# Supplementary material
Source: PubMed Central journal article supplement (PMC7204524)

**Supporting Information**  
**for**  
**Design, Synthesis, and Evaluation of Novel Anti-Trypanosomal**  
**Compounds**

Lance T. Lepovitz<sup>†</sup>, Alan R. Meis<sup>‡</sup>, Sarah M. Thomas<sup>§</sup>, Justin Wiedeman<sup>§</sup>, Alexandra Pham<sup>‡</sup>,  
Kojo Mensa-Wilmot<sup>§</sup>, and Stephen F. Martin<sup>‡,\*</sup>

<sup>†</sup>Department of Molecular Biosciences, The University of Texas, Austin, TX 78712, USA.

<sup>‡</sup>Department of Chemistry, The University of Texas, Austin, TX 78712, USA. <sup>§</sup> Department of Cellular Biology, and Center for Tropical and Emerging Global Diseases, University of Georgia, Athens, GA 30602

[sfmartin@mail.utexas.edu](mailto:sfmartin@mail.utexas.edu)

| <b>Table of contents</b>                                  | <b>Page</b> |
|-----------------------------------------------------------|-------------|
| General experimental                                      | 3           |
| Synthesis and characterization of other new compounds     | 4           |
| <i>T. brucei</i> proliferation inhibition assay           | 38          |
| Expression and purification of recombinant <i>TbMetRS</i> | 38          |
| <i>TbMetRS</i> aminoacylation assay                       | 38          |
| References                                                | 39          |
| <sup>1</sup> H and <sup>13</sup> C NMR Spectra            | 40          |

**General.** Tetrahydrofuran and diethyl ether were dried by filtration through two columns of activated, neutral alumina prior to use. Methanol, acetonitrile and dimethylformamide were dried by filtration through two columns of activated molecular sieves, and toluene was dried by filtration through one column of activated, neutral alumina followed by one column of Q5 reactant. Benzene was distilled from sodium and benzophenone. Methylene chloride, diisopropylamine, triethylamine, and diisopropylethylamine were distilled from calcium hydride immediately prior to use. Pyridine was distilled from potassium hydroxide (KOH) and calcium hydride and stored over KOH. Dioxane was distilled from sodium metal and benzophenone prior to use. All solvents were determined to have less than 50 ppm H<sub>2</sub>O by Karl Fischer coulometric moisture analysis. All reagents were reagent grade and used without purification unless otherwise noted. All reactions involving air or moisture sensitive reagents or intermediates were performed under an inert atmosphere of nitrogen or argon in glassware that was flame dried. Solutions were degassed using three freeze-thaw cycles under vacuum. Reaction temperatures refer to the temperature of the cooling/heating bath. Volatile solvents were removed under reduced pressure using a Büchi rotary evaporator at 25–30 °C. Thin layer chromatography was performed using run on pre-coated plates of silica gel with a 0.25 mm thickness containing 60F-254 indicator (Merck). Chromatography was performed using forced flow (flash chromatography) and the indicated solvent system on 230-400 mesh silica gel (E. Merck reagent silica gel 60) according to the method of Still,<sup>1</sup> unless otherwise noted.

Infrared (IR) spectra were obtained either neat on sodium chloride or as solutions in the solvent indicated and reported as wavenumbers (cm<sup>-1</sup>). Proton nuclear magnetic resonance (<sup>1</sup>H NMR) and carbon nuclear magnetic resonance (<sup>13</sup>C NMR) spectra were obtained at the specified field as solutions in CDCl<sub>3</sub> unless otherwise indicated. Chemical shifts are referenced to the deuterated solvent and are reported in parts per million (ppm,  $\delta$ ) downfield from tetramethylsilane (TMS,  $\delta$  = 0.00 ppm). Coupling constants (*J*) are reported in Hz and the splitting abbreviations used are: s, singlet; d, doublet; t, triplet; q, quartet; m, multiplet; comp, overlapping multiplets of magnetically nonequivalent protons; br, broad; app, apparent. In reporting the HRMS for compounds containing chlorine, the calculated and measured masses are for the isotope <sup>35</sup>Cl.

**(±)-(3R,4S)-1-(2-(1H-Indol-3-yl)ethyl)-4-((3-chloro-5-methoxybenzyl)(methyl)amino)-3-((R)-1-hydroxyethyl)piperidin-2-one (14b).** Prepared according to representative procedure for compound **14a**. The crude material was purified via flash column chromatography eluting with a gradient with hexanes : ethyl acetate (1 : 1) → ethyl acetate : methanol (20 : 1). To give 30 mg (27%) of **14b** as an amorphous white solid. <sup>1</sup>H NMR (400 MHz) δ 8.24 (s, 1 H), 7.57 (d, *J* = 7.6 Hz, 1 H), 7.33 (d, *J* = 7.6 Hz, 1 H), 7.18 (td, *J* = 7.2, 1.2 Hz, 1 H), 7.10 (td, *J* = 8.0, 1.2 Hz, 1 H), 7.01 (d, *J* = 2.4 Hz, 1 H), 6.80 (t, *J* = 1.6 Hz, 1 H), 6.78 (t, *J* = 1.6 Hz, 1 H), 6.67 (t, *J* = 1.6 Hz, 1 H), 4.33 (p, *J* = 6.4 Hz, 1 H), 3.79 - 3.72 (comp, 4 H), 3.61 (p, *J* = 6.4 Hz, 1 H), 3.47 - 3.30 (comp, 3 H), 3.23 (dt, *J* = 12.4, 4.8 Hz, 1 H), 3.10 (dt, *J* = 12.4, 9.2 Hz, 1 H), 3.02 - 2.90 (comp, 2 H), 2.38 (t, *J* = 6.0 Hz, 1 H), 2.06 (s, 3 H), 1.91 - 1.85 (comp, 2 H), 1.18 (d, *J* = 6.4 Hz, 3 H); <sup>13</sup>C NMR (100 MHz) δ 170.9, 160.5, 139.6, 136.2, 135.0, 127.3, 122.3, 122.1, 121.4, 119.3, 118.4, 113.6, 113.4, 112.4, 111.4, 66.3, 59.0, 58.0, 55.6, 48.5, 47.4, 45.0, 37.5, 23.1, 22.1, 20.5; HRMS (ESI) *m/z* calcd for C<sub>26</sub>H<sub>32</sub>ClN<sub>3</sub>O<sub>3</sub> (M+H)<sup>+</sup>, 470.2205; found, 470.2207.

**(3R,4S)-1-(2-(1H-Indol-3-yl)ethyl)-4-((3-chlorobenzyl)(methyl)amino)-3-((R)-1-hydroxyethyl)piperidin-2-one (14c).** Prepared according to representative procedure for compound **14a**. The crude material was purified via flash column chromatography eluting along a gradient with hexanes : ethyl acetate (3 : 1 → 0 : 1) to give 26 mg (37%) of **14c** as an amorphous white solid. <sup>1</sup>H NMR (400 MHz, CD<sub>3</sub>OD) δ 7.58 (d, *J* = 7.6 Hz, 1 H), 7.33 (d, *J* = 7.4 Hz, 1 H), 7.31 - 7.26 (comp, 3 H), 7.18 (dt, *J* = 6.8, 1.6 Hz, 1 H), 7.11 - 7.07 (comp, 2 H), 7.02 (ddd, *J* = 7.6, 6.8, 0.8 Hz, 1 H), 4.22 (dq, *J* = 8.8, 6.0 Hz, 1 H), 3.77 (dt, *J* = 13.2, 7.2 Hz, 1 H), 3.57 - 3.51 (comp, 2 H), 3.44 (d, *J* = 12.8 Hz, 1 H), 3.35 - 3.32 (m, 1 H), 3.18 - 2.90 (comp, 4 H), 2.59 (dd, *J* = 8.4, 5.2 Hz, 1 H), 2.07 (s, 3 H), 2.04 - 1.98 (m, 1 H), 1.94 - 1.87 (m, 1 H), 1.20 (d, *J* = 6.4 Hz, 3 H); <sup>13</sup>C NMR (100 MHz, CD<sub>3</sub>OD) δ 171.8, 141.6, 138.1, 135.5, 131.1, 130.0, 128.9, 128.5, 123.7, 122.4, 119.7, 119.3, 112.8, 112.3, 67.9, 61.2, 58.9, 51.0, 46.6, 38.3, 24.0, 22.8, 22.4; HRMS (ESI) *m/z* calcd for C<sub>25</sub>H<sub>30</sub>ClN<sub>3</sub>O<sub>2</sub> (M+H)<sup>+</sup>, 440.2099; found, 440.2099.

**(3R,4S)-1-(2-(1H-Indol-3-yl)ethyl)-4-((3,5-dimethoxybenzyl)(methyl)amino)-3-((R)-1-hydroxyethyl)piperidin-2-one (14d).** Prepared according to representative procedure for compound **14a**. The crude material was purified via flash column chromatography eluting with a gradient with hexanes : ethyl acetate (1 : 1 → 0 : 1) to give 37 mg (50%) of **14d** as an amorphous white solid. <sup>1</sup>H NMR (400 MHz, CD<sub>3</sub>OD) δ 7.58 (dt, *J* = 8.0, 0.8 Hz, 1 H), 7.33 (dt, *J* = 8.0, 0.8 Hz, 1 H), 7.11 - 7.07 (comp, 2 H), 7.01 (td, *J* = 8.0, 6.8, 1.2 Hz, 1 H), 6.42 (d, *J* = 2.4 Hz, 2 H), 6.38 (t, *J* = 2.4 Hz, 1 H), 4.23 (dq, *J* = 14.0, 6.0 Hz, 1 H), 3.81 - 3.71 (comp, 7 H), 3.57 - 3.51 (m, 1 H), 3.47, 3.41 (ABq, *J*<sub>AB</sub> = 12.8 Hz, 2 H), 3.34 - 3.30 (m, 1 H), 3.17 - 2.93 (comp, 4 H), 2.58 (dd, *J* = 8.8, 5.6 Hz, 1 H), 2.09 (s, 3 H), 2.04 - 1.98 (m, 1 H), 1.95 - 1.85 (m, 1 H), 1.19 (d, *J* = 6.0 Hz, 3 H); <sup>13</sup>C NMR (100 MHz, CD<sub>3</sub>OD) δ 171.9, 162.5, 141.4, 138.1, 128.9, 123.7, 122.4, 119.7, 119.3, 112.8, 112.3, 107.8, 100.3, 68.0, 61.0, 59.8, 55.7, 50.9, 46.7, 38.4, 24.0, 22.8, 22.3; HRMS (ESI) *m/z* calcd for C<sub>27</sub>H<sub>35</sub>N<sub>3</sub>O<sub>4</sub> (M+H)<sup>+</sup>, 466.2700; found, 466.2701.

**(3R,4S)-1-(2-(1H-Indol-3-yl)ethyl)-3-((R)-1-hydroxyethyl)-4-((3-methoxybenzyl)(methylamino)piperidin-2-one (14e).** Prepared according to representative procedure for compound **14a**. The crude material was purified via flash column chromatography eluting with a gradient with hexanes : ethyl acetate (1 : 1) → ethyl acetate : methanol (20 : 1) to give 18 mg (26%) of **14e** as an off-white, amorphous solid. <sup>1</sup>H NMR (400 MHz) δ 8.19 (s, 1 H), 7.58 (d, *J* = 8.0 Hz, 1 H), 7.34 (d, *J* = 8.0 Hz, 1 H), 7.24 – 7.16 (comp, 2 H), 7.10 (td, *J* = 8.0, 1.2 Hz, 1 H), 7.03 (d, *J* = 2.4 Hz, 1 H), 6.82 (d, *J* = 2.0 Hz, 1 H), 6.80 (d, *J* = 2.0 Hz, 1 H), 6.77 (t, *J* = 2.0 Hz, 1 H), 4.33 (p, *J* = 6.4 Hz, 1 H), 3.81 - 3.74 (comp, 4 H), 3.60 (p, *J* = 6.4 Hz, 1 H), 3.50, 3.43 (ABq, *J*<sub>AB</sub> = 12.8 Hz, 2 H), 3.37 - 3.32 (m, 1 H), 3.24 (dt, *J* = 12.0, 4.4 Hz, 1 H), 3.11 (dt, *J* = 12.0, 8.0 Hz, 1 H), 3.04 - 2.92 (comp, 2 H), 2.41 (t, *J* = 7.2 Hz, 1 H), 2.07 (s, 3 H), 1.95 - 1.89 (comp, 2 H), 1.19 (d, *J* = 6.4 Hz, 3 H); <sup>13</sup>C NMR (100 MHz, CD<sub>3</sub>OD) δ 171.8, 161.4, 140.3, 137.6, 130.6, 128.9, 123.7, 122.4, 122.3, 119.7, 119.3, 115.5, 114.2, 112.8, 112.3, 68.0, 61.2, 59.6, 55.6, 50.9, 46.6, 38.3, 24.0, 22.9, 22.3; HRMS (ESI) *m/z* calcd for C<sub>26</sub>H<sub>33</sub>N<sub>3</sub>O<sub>3</sub> (M+H)<sup>+</sup>, 436.2595; found, 436.2599.

**(3R,4S)-1-(2-(1H-Indol-3-yl)ethyl)-4-((benzo[*d*][1,3]dioxol-5-ylmethyl)(methylamino)-3-((R)-1-hydroxyethyl)piperidin-2-one (14f).** Prepared according to representative procedure for compound **14a**. The crude material was purified via flash column chromatography eluting with a gradient with hexanes : ethyl acetate (3 : 1 → 0 : 1) to give 30 mg (28%) of **14f** as an off-white, an amorphous solid; <sup>1</sup>H NMR (400 MHz) δ 8.35 (s, 1 H), 7.63 (d, *J* = 7.6 Hz, 1 H), 7.35 (d, *J* = 8.0 Hz, 1 H), 7.19 (t, *J* = 7.2 Hz, 1 H), 7.12 (t, *J* = 7.6 Hz, 1 H), 7.02 (d, *J* = 2.0 Hz, 1 H), 6.74 – 6.72 (comp, 2 H), 6.67 (d, *J* = 8.0 Hz, 1 H), 4.28 (dq *J* = 6.4, 6.0 Hz, 1 H), 3.81 (p, *J* = 7.6 Hz, 1 H), 3.54 (p, *J* = 6.4 Hz, 1 H), 3.48, 3.37 (ABq, *J*<sub>AB</sub> = 12.4 Hz, 2 H), 3.28 - 3.23 (m, 1 H), 3.16 - 3.10 (comp, 2 H), 3.07 - 2.98 (comp, 2 H), 2.65 (dd, *J* = 8.8, 5.2 Hz, 1 H), 2.10 (s, 3 H), 1.99 - 1.96 (comp, 2 H), 1.32 (d, *J* = 6.0 Hz, 3 H); <sup>13</sup>C NMR (100 MHz) δ 170.1, 148.0, 147.1, 136.4, 131.2, 127.5, 122.4, 122.2, 122.1, 119.4, 118.7, 112.8, 111.4, 109.4, 108.3, 101.1, 66.8, 59.8, 58.6, 50.1, 47.6, 45.6, 38.0, 23.3, 22.8, 21.6; HRMS (ESI) *m/z* calcd for C<sub>26</sub>H<sub>31</sub>N<sub>3</sub>O<sub>4</sub> (M+H)<sup>+</sup>, 450.2387; found, 450.2394.

**(3R,4S)-1-(2-(1H-Indol-3-yl)ethyl)-3-((R)-1-hydroxyethyl)-4-(methyl(3-(methylthio)benzyl)amino)piperidin-2-one (14g).** Prepared according to representative procedure for compound **14a**. The crude material was purified via flash column chromatography eluting with a gradient with hexanes : ethyl acetate (1 : 1 → 0 : 1) to give 45 mg (49%) of **14g** as a fluffy white solid. <sup>1</sup>H NMR (400 MHz, CD<sub>3</sub>OD) δ 7.58 (d, *J* = 7.6 Hz, 1 H), 7.33 (d, *J* = 8.0 Hz, 1 H), 7.26 (td, *J* = 7.6, 0.8 Hz, 1 H), 7.17 - 7.15 (comp, 2 H), 7.09 (ddd, *J* = 8.0, 7.6, 0.8 Hz, 1 H), 7.07 (s, 1 H), 7.03 - 6.99 (comp, 2 H), 4.22 (dq, *J* = 8.8, 6.0 Hz, 1 H), 3.77 (dt, *J* = 13.2, 7.6 Hz, 1 H), 3.56 - 3.49 (comp, 2 H), 3.43 (d, *J* = 12.8, 1 H), 3.34 - 3.28 (m, 1 H), 3.17 - 2.92 (comp, 4 H), 2.58 (dd, *J* = 8.8, 5.6 Hz, 1 H), 2.45 (s, 3 H), 2.07 (s, 3 H), 2.02 - 1.86 (comp, 2 H), 1.19 (d, *J* = 6.4 Hz, 3 H); <sup>13</sup>C NMR (100 MHz, CD<sub>3</sub>OD) δ 171.8, 140.6, 139.7,

138.1, 130.0, 128.8, 127.8, 126.7, 125.4, 123.7, 122.4, 119.7, 119.3, 112.8, 112.3, 67.9, 61.1, 59.4, 50.9, 46.5, 38.3, 24.0, 22.9, 22.3, 15.5; HRMS (ESI)  $m/z$  calcd for  $C_{26}H_{33}N_3O_2S$  (M+Na)<sup>+</sup>, 474.2186; found, 474.2187.

(±)-(3*R*,4*S*)-1-(2-(1*H*-Indol-3-yl)ethyl)-4-(benzyl(methyl)amino)-3-((*R*)-1-hydroxyethyl)piperidin-2-one (**14h**). Prepared according to representative procedure for compound **14a**. The crude material was purified via flash column chromatography eluting with a gradient with hexanes : ethyl acetate (1 : 1) → ethyl acetate : methanol (20 : 1). To give 31 mg (48%) of **14h** as an off-white, amorphous solid. <sup>1</sup>H NMR (500 MHz) δ 8.13 (brs, 1 H), 7.58 (d,  $J = 7.9$  Hz, 1 H), 7.35 (d,  $J = 7.9$  Hz, 1 H), 7.33 – 7.26 (comp, 3 H), 7.21 (d,  $J = 6.6$  Hz, 2 H), 7.19 (t,  $J = 7.1$  Hz, 1 H), 7.11 (t,  $J = 7.1$  Hz, 1 H), 7.03 (d,  $J = 2.2$  Hz, 1 H), 4.34 (p,  $J = 6.1$  Hz, 1 H), 3.76 (p,  $J = 7.6$  Hz, 1 H), 3.64 (p,  $J = 6.4$  Hz, 1 H), 3.52, 3.47 (ABq,  $J_{AB} = 12.7$  Hz, 2 H), 3.42 (q,  $J = 7.6$  Hz, 1 H), 3.26 (ddd,  $J = 13.7, 6.6, 3.4$  Hz, 1 H), 3.16 - 3.10 (m, 1 H), 3.04 - 2.93 (comp, 2 H), 2.35 (t,  $J = 5.6$  Hz, 1 H), 2.06 (s, 3 H), 1.96 - 1.90 (comp, 2 H), 1.16 (d,  $J = 6.4$  Hz, 3 H); <sup>13</sup>C NMR (125 MHz) δ 171.7, 136.7, 136.3, 129.3, 128.7, 127.9, 127.3, 122.3, 122.1, 119.4, 118.4, 112.4, 111.4, 66.4, 60.0, 48.3, 47.4, 45.1, 37.2, 29.7, 23.2, 21.9, 20.1; HRMS (ESI)  $m/z$  calcd for  $C_{25}H_{31}N_3O_2$  (M+H)<sup>+</sup>, 406.2489; found, 406.2490.

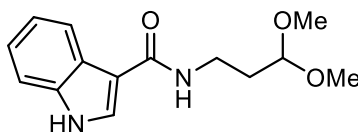

**S1**

**N-(3,3-Dimethoxypropyl)-1*H*-indole-3-carboxamide (S1)**. Freshly distilled thionyl chloride (0.37 g, 3.2 mmol) was added dropwise over 10 min, followed by addition of DMF (3 drops), to a solution of indole-3-carboxylic acid (0.42 g, 2.6 mmol) in THF (13 mL) at 0 °C. The reaction was stirred for 1.5 h at 0 °C and for an additional 0.5 h at room temperature. The solvent was removed *in vacuo*, whereupon the crude material was taken up in  $CH_2Cl_2$  (5 mL), and added dropwise over 10 min to a solution of **9** (0.52 g, 2.6 mmol) and triethylamine (0.79 g, 7.8 mmol) in  $CH_2Cl_2$  (50 mL) at 0 °C. The reaction was stirred for 1 h at 0 °C, then warmed to room temperature and stirred for an additional 1 h. The mixture was diluted with  $CH_2Cl_2$  (100 mL), and successively washed with saturated aqueous  $NH_4Cl$  (100 mL), saturated aqueous  $Na_2CO_3$  (100 mL), water (100 mL) and brine (100 mL). The organic fraction was dried ( $Na_2SO_4$ ), filtered, and concentrated *in vacuo* to give 0.60 g (88%) of **S1** as a viscous oil (>95% purity, by <sup>1</sup>H NMR): <sup>1</sup>H NMR (400 MHz) δ 9.94 (brs, 1 H), 7.95 - 7.93 (m, 1 H), 7.72 (d,  $J = 2.9$  Hz, 1 H), 7.44 - 7.42 (m, 1 H), 7.25 - 7.20 (comp, 2 H), 6.85 (t,  $J = 4.9$  Hz, 1 H), 4.54 (t,  $J = 5.4$  Hz, 1 H), 3.64 (q,  $J = 5.4$  Hz, 2 H), 3.40 (s, 6 H), 1.98 (q,  $J = 5.4$  Hz, 2 H); <sup>13</sup>C NMR (100 MHz) δ 165.7, 136.8, 128.9, 124.5, 122.7, 121.5, 119.5, 112.4,

112.2, 104.9, 53.8, 35.6, 32.2; HRMS (ESI)  $m/z$  calcd for  $C_{14}H_{18}N_2O_3$  ( $M+Na$ )<sup>+</sup>, 285.1210; found, 285.1212.

**(E)-N-((1H-Indol-3-yl)methyl)-N-(3,3-dimethoxypropyl)but-2-enamide (16a).** A solution of **S1** (140 mg, 0.53 mmol) in THF (3 mL) was added dropwise over 10 min to a stirred suspension of lithium aluminum hydride (100 mg, 2.7 mmol) in THF (10 mL) at 0 °C. The reaction heated to 65 °C for 48 h, then cooled to 0 °C, and the Fieser work-up was performed by successive addition of water (0.1 mL), aqueous NaOH (15%, 0.1 mL), and water (1 mL). The suspension was warmed to room temperature and  $MgSO_4$  was added, followed by removal of solids by vacuum filtration through a fritted funnel, and washing with copious amounts of ether and  $CH_2Cl_2$ . The filtrate was concentrated *in vacuo* to give 132 mg (quant.) of crude *N*-((1H-indol-3-yl)methyl)-3,3-dimethoxypropan-1-amine as an opaque viscous oil which was found to be unstable to acid/base extraction and chromatographic conditions, and was immediately carried on to the next step without further purification.

Crotonoyl chloride (66 mg, 0.64 mmol) was added dropwise over 5 min to a stirred solution of crude *N*-((1H-indol-3-yl)methyl)-3,3-dimethoxypropan-1-amine (130 mg, 0.53 mmol) and Hünig's base (165 mg, 1.28 mmol) in  $CH_2Cl_2$  (5 mL) at -78 °C. The solution was stirred for 2 h at -78 °C, then partitioned between saturated aqueous  $NaHCO_3$  (10 mL) and  $CH_2Cl_2$  (10 mL). The phases were separated, and the aqueous phase extracted with  $CH_2Cl_2$  (2 x 10 mL). The combined organic fractions were successively washed with water (10 mL) and brine (10 mL), dried ( $Na_2SO_4$ ), filtered, and concentrated *in vacuo* to give crude **16a** as a viscous yellow oil. The crude material was purified via silica gel flash column chromatography eluting with hexanes : ethyl acetate (2 : 1 → 1 : 1 along a gradient) to give 141 mg (86%, two-steps) of **16a** as a yellow amorphous solid:  $^1H$  NMR (400 MHz) (1:1 rotamer mixture)  $\delta$  9.04 (brs, 0.5 H), 8.85 (brs, 0.5 H), 7.69 (d,  $J = 7.8$  Hz, 0.5 H), 7.53 (d,  $J = 7.8$  Hz, 0.5 H), 7.38 (d,  $J = 8.1$  Hz, 0.5 H), 7.34 (d,  $J = 8.1$  Hz, 0.5 H), 7.23 - 6.96 (comp, 4 H), 6.41 (dd,  $J = 14.9, 1.2$  Hz, 0.5 H), 6.34 (dd,  $J = 14.9, 1.2$  Hz, 0.5 H), 4.85 (s, 1 H), 4.75 (s, 1 H), 4.40 (t,  $J = 5.5$  Hz, 0.5 H), 4.30 (t,  $J = 5.5$  Hz, 0.5 H), 3.53 (t,  $J = 7.4$  Hz, 1 H), 3.40 (t,  $J = 7.4$  Hz, 1 H) 3.28 (s, 6 H), 1.97 - 1.81 (comp, 5 H);  $^{13}C$  NMR (100 MHz) (1 : 1 rotamer mixture)  $\delta$  166.0, 165.4, 141.0, 140.9, 135.7, 135.3, 125.9, 124.9, 123.2, 121.5, 121.3, 121.1, 121.1, 120.9, 118.6, 118.2, 117.3, 111.0, 110.6, 110.2, 101.9, 101.3, 52.2, 51.9, 43.5, 41.5, 41.0, 38.9, 31.1, 29.8, 17.3, 17.2; HRMS (ESI)  $m/z$  calcd for  $C_{18}H_{24}N_2O_3$  ( $M+Na$ )<sup>+</sup>, 339.1679; found, 339.1680.

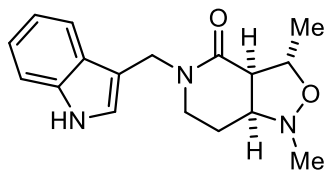

**S2**

**(3R,3aR,7aS)-5-((1H-Indol-3-yl)methyl)-1,3-dimethylhexahydroisoxazolo[4,3-c]pyridin-4(1H)-one (S2).** A solution of trifluoroacetic acid (36 mg, 0.32 mmol) and **16a** (100 mg, 0.32 mmol) in a mixture of acetone/water (2 : 1, 6 mL) was stirred for 3 h at room temperature. Saturated aqueous NaHCO<sub>3</sub> (20 mL) was added, the layers were separated, and the aqueous layer was extracted with CH<sub>2</sub>Cl<sub>2</sub> (3 x 30 mL). The combined organic fractions were dried (Na<sub>2</sub>SO<sub>4</sub>), filtered, and concentrated *in vacuo*. The resulting residue was dissolved in toluene (5 mL), followed by the addition of *N*-methylhydroxylamine hydrochloride (40 mg, 0.47 mmol) and triethylamine (81 mg, 0.80 mmol). The resulting solution was heated under reflux for 1 h, at which point the solution was cooled to room temperature, and partitioned between saturated aqueous NaHCO<sub>3</sub> (20 mL), ethyl acetate (20 mL) and methanol (1 mL). The phases were separated, and the aqueous phase was extracted with ethyl acetate (3 x 20 mL). The combined organic fractions were washed successively with water (50 mL) and brine (50 mL), dried (Na<sub>2</sub>SO<sub>4</sub>), filtered, and concentrated *in vacuo* to give 76 mg (81%, two-steps) of **S2** as a colorless oil (>95% purity, by <sup>1</sup>H NMR): <sup>1</sup>H NMR (400 MHz, CD<sub>3</sub>OD) δ 7.57 (dt, *J* = 8.0, 1.0 Hz, 1 H), 7.35 (dt, *J* = 8.2, 0.8 Hz, 1 H), 7.26 (s, 1 H), 7.11 (ddd, *J* = 8.2, 7.1, 1.2 Hz, 1 H), 7.00 (ddd, *J* = 8.0, 7.1, 1.0 Hz, 1 H), 4.78 (s, 2 H), 3.93 - 3.87 (m, 1 H), 3.40 - 3.33 (m, 1 H), 3.20 (dt, *J* = 12.8, 4.3 Hz, 1 H), 2.97 - 2.88 (comp, 2 H), 2.62 (s, 3 H), 1.79 (tt, *J* = 14.4, 4.0 Hz, 1 H), 1.63 (dq, *J* = 14.4, 3.9 Hz, 1 H), 1.45 (d, *J* = 6.0 Hz, 3 H); <sup>13</sup>C NMR (100 MHz, CD<sub>3</sub>OD) δ 169.2, 136.9, 126.5, 124.5, 121.4, 118.7, 118.4, 111.0, 109.8, 77.3, 66.2, 54.9, 41.4, 41.1, 24.1, 24.1, 18.1; HRMS (ESI) *m/z* calcd for C<sub>17</sub>H<sub>21</sub>N<sub>3</sub>O<sub>2</sub> (M+Na)<sup>+</sup>, 322.1526; found, 322.1529.

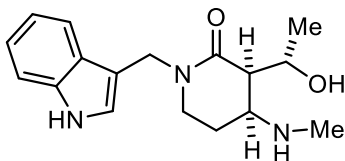

**S3**

**(3R,4S)-1-((1H-Indol-3-yl)methyl)-3-((R)-1-hydroxyethyl)-4-(methylamino)piperidin-2-one (S3).** A mixture of **S2** (100 mg, 0.35 mmol) and zinc (dust, 680 mg, 10.4 mmol) in acetic acid (aq 80%, 21 mL) was stirred for 48 h at room temperature. Excess zinc was removed via vacuum filtration, and washed with ethyl acetate (150 mL), whereupon zinc acetate immediately precipitated out of solution as a fluffy



white solid. The zinc acetate was removed by vacuum filtration and washed with ethyl acetate. The combined filtrate and washes were concentrated *in vacuo*, and the residue dissolved in aqueous HCl (1 M, 50 mL). The resulting solution was washed with ether (50 mL), and basified to pH ~14 with solid NaOH. The basic solution was extracted with CH<sub>2</sub>Cl<sub>2</sub> (3 x 75 mL). The combined organic fractions were washed with brine (100 mL), dried (Na<sub>2</sub>SO<sub>4</sub>), filtered, and concentrated *in vacuo* to give 150 mg (quant) of crude **S3** as the acetate salt with residual acetic acid. The crude material was taken up in aqueous HCl (1 M, 50 mL) and washed with ether (2 x 50 mL). The aqueous fraction was basified to pH ~14 with solid NaOH, and extracted with CH<sub>2</sub>Cl<sub>2</sub> (3 x 75 mL). The combined organic fractions were successively washed with aqueous NaOH (1 M, 100 mL), saturated aqueous NaHCO<sub>3</sub> (100 mL), water (100 mL), and brine (100 mL). The organic fraction was dried (Na<sub>2</sub>SO<sub>4</sub>), filtered, and concentrated *in vacuo* to give 69 mg (66%) of pure **S3** as an off-white, amorphous solid: <sup>1</sup>H NMR (400 MHz, CD<sub>3</sub>OD) δ 7.59 (dt, *J* = 7.9, 0.9 Hz, 1 H), 7.35 (dt, *J* = 8.1, 0.9 Hz, 1 H), 7.24 (s, 1 H), 7.09 (ddd, *J* = 8.1, 7.0, 1.1 Hz, 1 H), 6.98 (ddd, *J* = 7.9, 7.0, 1.0 Hz, 1 H), 4.89 (d, *J* = 14.4 Hz, 1 H), 4.56 (d, *J* = 14.4, 1 H), 4.42 (p, *J* = 6.4 Hz, 1 H), 3.38 (dt, *J* = 12.9, 6.6 Hz, 1 H), 3.28 - 3.21 (comp, 2 H), 2.55 (dd, *J* = 6.5, 4.1 Hz, 1 H), 2.43 (s, 3 H), 2.10 - 2.02 (m, 1 H), 1.88 - 1.83 (m, 1 H), 1.33 (d, *J* = 6.4 Hz, 3 H); <sup>13</sup>C NMR (100 MHz, CD<sub>3</sub>OD) δ 169.7, 136.8, 126.7, 124.4, 121.3, 118.7, 118.4, 110.9, 110.1, 66.3, 54.8, 50.1, 42.1, 40.8, 32.4, 23.8, 21.0; HRMS (ESI) *m/z* calcd for C<sub>17</sub>H<sub>23</sub>N<sub>3</sub>O<sub>2</sub> (M+Na)<sup>+</sup>, 324.1682; found, 324.1686.

**(3R,4S)-1-((1H-Indol-3-yl)methyl)-4-((3,5-dichlorobenzyl)(methyl)amino)-3-((R)-1-hydroxyethyl)piperidin-2-one (14i)**. A solution of **S3** (75 mg, 0.25 mmol) and 3,5-dichlorobenzaldehyde (130 mg, 0.75 mmol) in acetonitrile (2 mL) was heated under reflux for 5 h. The reaction was cooled to room temperature, and sodium borohydride (28 mg, 0.75 mmol) was added. The solution was stirred at room temperature for 14 h, at which point, LC/MS analysis showed no trace of the desired product. Methanol (1 mL) and acetic acid (0.2 mL) were added, and the solution was stirred for 24 h at room temperature, no product detected by LC/MS. Acetic acid (0.1 mL) and NaBH<sub>3</sub>CN (62 mg, 1.0 mmol) were added, and the solution was stirred for an additional 24 h at room temperature. LC/MS analysis showed complete conversion to product and the reaction mixture was partitioned between aqueous NaOH (1 M, 20 mL) and CH<sub>2</sub>Cl<sub>2</sub> (25 mL). The two phases were separated, and the aqueous phase extracted with CH<sub>2</sub>Cl<sub>2</sub> (2 x 25 mL). The combined organic fractions were washed with water (50 mL), brine (50 mL), dried (Na<sub>2</sub>SO<sub>4</sub>), filtered, and concentrated *in vacuo* to give crude **14i** as an amorphous solid. The crude material was purified via silica gel flash column chromatography eluting with CH<sub>2</sub>Cl<sub>2</sub> : methanol (1 : 0 → 95 : 5 along a gradient) to give 59 mg (51%) of **14i** as an amorphous white solid: <sup>1</sup>H NMR (400 MHz) δ 8.54 (brs, 1 H), 7.68 (d, *J* = 8.0 Hz, 1 H), 7.38 (d, *J* = 8.4 Hz, 1 H), 7.25 - 7.18 (comp, 3 H), 7.09 (ddd, *J* = 8.0, 7.2, 0.8 Hz, 1 H), 7.06 (d, *J* = 2.0 Hz, 2 H), 4.96 (d, *J* = 14.4 Hz, 1 H), 4.51 (d, *J* = 14.4 Hz, 1 H), 4.36 (dq, *J* = 8.4, 5.6 Hz, 1 H), 3.42 - 3.35 (comp, 3 H), 3.23 - 3.11 (comp, 2 H), 2.75 (dd, *J* = 8.8, 6.0 Hz, 1 H), 2.06 (s, 3 H), 1.99 - 1.92

(m, 1 H), 1.86 - 1.78 (m, 1 H), 1.41 (d,  $J = 6.0$  Hz, 3 H);  $^{13}\text{C}$  NMR (100 MHz)  $\delta$  169.7, 141.2, 136.3, 135.1, 127.7, 127.0, 126.8, 124.3, 122.4, 119.9, 119.3, 111.5, 111.3, 66.5, 60.4, 57.5, 50.3, 43.5, 40.8, 38.6, 22.6, 21.6; HRMS (ESI)  $m/z$  calcd for  $\text{C}_{26}\text{H}_{31}\text{Cl}_2\text{N}_3\text{O}_3$  ( $\text{M}+\text{Na}$ ) $^+$ , 482.1373 and 484.1348; found, 482.1373 and 484.1349.

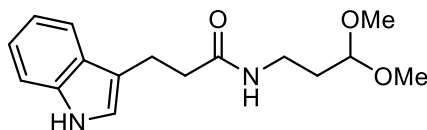

**S4**

***N*-(3,3-Dimethoxypropyl)-3-(1*H*-indol-3-yl)propanamide (S4).** Thionyl chloride (1.1 g, 9.6 mmol) was added dropwise over 10 min to a solution of **15b** (1.5 g, 8.0 mmol) and DMF (3 drops) in THF (40 mL) at 0 °C. The reaction was stirred for 2 h at 0 °C, whereupon all volatiles were removed *in vacuo*. The crude material was dissolved in  $\text{CH}_2\text{Cl}_2$  (20 mL) and added dropwise over 20 min to a solution of **9** (1.46 g, 7.3 mmol) and triethylamine (3.30 g, 32.8 mmol) in  $\text{CH}_2\text{Cl}_2$  (120 mL) at 0 °C. The reaction was stirred for 1 h at 0 °C, followed by stirring for 2 h at room temperature. The solution was diluted with  $\text{CH}_2\text{Cl}_2$  (300 mL) and washed successively with saturated aqueous  $\text{NH}_4\text{Cl}$  (150 mL), aqueous  $\text{Na}_2\text{CO}_3$  (5% w/v, 150 mL), and brine (150 mL). The organic fraction was dried ( $\text{Na}_2\text{SO}_4$ ), filtered, and concentrated *in vacuo* to give crude **S4** as a viscous yellow oil. The crude material was purified via silica gel flash column chromatography eluting with hexanes : ethyl acetate (1 : 1  $\rightarrow$  1 : 3 along a gradient) to give 2.05 g (97%) of **S4** as a viscous yellow oil.  $^1\text{H}$  NMR (400 MHz)  $\delta$  8.42 (brs, 1 H), 7.59 (d,  $J = 8.0$  Hz, 1 H), 7.33 (d,  $J = 8.0$  Hz, 1 H), 7.18 (td,  $J = 8.0, 1.2$  Hz, 1 H), 7.11 (ddd,  $J = 8.0, 7.2, 0.8$  Hz, 1 H), 6.96 (d,  $J = 2.4$  Hz, 1 H), 5.94 (brs, 1 H), 4.26 (t,  $J = 5.2$  Hz, 1 H), 3.30 - 3.25 (comp, 8 H), 3.10 (t,  $J = 7.2$  Hz, 2 H), 2.55 (t,  $J = 7.2$  Hz, 2 H), 1.69 (q,  $J = 7.2$  Hz, 2H);  $^{13}\text{C}$  NMR (100 MHz)  $\delta$  172.7, 136.4, 127.1, 121.9, 121.8, 119.2, 118.6, 114.7, 111.3, 103.9, 53.3, 37.4, 35.3, 31.9, 21.4; HRMS (ESI)  $m/z$  calcd for  $\text{C}_{16}\text{H}_{22}\text{N}_2\text{O}_3$  ( $\text{M}+\text{Na}$ ) $^+$ , 313.1523; found, 313.1524.

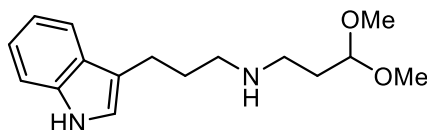

**S5**

***N*-(3-(1*H*-Indol-3-yl)propyl)-3,3-dimethoxypropan-1-amine (S5).** A solution of **S4** (400 mg, 1.4 mmol) in THF (5 mL) was added dropwise over 15 min to a suspension of lithium aluminum hydride (120 mg, 3.0 mmol) in THF (30 mL) at 0 °C. The reaction was heated at 65 °C for 14 h, at which point the

reaction was cooled to 0 °C, and the Fieser work-up was performed by successive addition of water (0.1 mL), aqueous NaOH (15% w/v, 0.1 mL), and water (1 mL). The suspension was warmed to room temperature and MgSO<sub>4</sub> was added. The solids were removed by filtration through a fritted funnel, and washed with copious amounts of CH<sub>2</sub>Cl<sub>2</sub>. The filtrate was concentrated *in vacuo* to give crude **S5** as an opaque viscous oil. The crude material was taken up into aqueous HCl (0.2 M, 150 mL) and washed with ether (2 x 100 mL). The aqueous fraction was basified to pH ~ 12-14 by dropwise addition of aqueous NaOH (40% w/v), and extracted with CH<sub>2</sub>Cl<sub>2</sub> (4 x 150 mL). The combined organic fractions were washed with saturated aqueous NaHCO<sub>3</sub> (200 mL), water (200 mL), and brine (200 mL). The organic fraction was dried (Na<sub>2</sub>SO<sub>4</sub>), filtered, and concentrated *in vacuo* to give 331 mg (87%) of **S5** as an oil (>95% purity, by <sup>1</sup>H NMR). <sup>1</sup>H NMR (400 MHz) δ 8.43 (brs, 1 H), 7.60 (d, *J* = 7.6 Hz, 1 H), 7.33 (dt, *J* = 8.0, 1.2 Hz, 1 H), 7.18 (td, *J* = 6.8, 1.2 Hz, 1 H), 7.10 (td, *J* = 6.8, 1.2 Hz, 1 H), 6.94 (d, *J* = 2.0 Hz, 1 H), 4.46 (t, *J* = 5.6 Hz, 1 H), 3.33 (s, 6 H), 2.80 (t, *J* = 7.6 Hz, 2 H), 2.72 - 2.68 (comp, 4 H), 1.92 (p, *J* = 7.6 Hz, 2 H), 1.82 (q, *J* = 6.0 Hz, 2 H); <sup>13</sup>C NMR (100 MHz) δ 136.4, 127.5, 121.8, 121.2, 119.0, 118.8, 116.1, 111.1, 103.6, 52.9, 49.9, 45.5, 32.8, 30.4, 22.9; HRMS (ESI) *m/z* calcd for C<sub>16</sub>H<sub>24</sub>N<sub>2</sub>O<sub>2</sub> (M+H)<sup>+</sup>, 277.1911; found 277.1912.

**(E)-N-(3-(1H-Indol-3-yl)propyl)-N-(3,3-dimethoxypropyl)but-2-enamide (16b)**. Crotonoyl chloride (200 mg, 1.9 mmol) was added dropwise over 10 min to a stirred solution of **S5** (440 mg, 1.6 mmol) and Hünig's base (500 mg, 3.8 mmol) in CH<sub>2</sub>Cl<sub>2</sub> (16 mL) at -78 °C. The solution was stirred for 2 h at -78 °C, then partitioned between saturated aqueous NaHCO<sub>3</sub> solution (50 mL) and CH<sub>2</sub>Cl<sub>2</sub> (50 mL). The two phases were separated and the aqueous phase extracted with CH<sub>2</sub>Cl<sub>2</sub> (2 x 50 mL). The combined organic fractions were successively washed with water (50 mL), brine (50 mL), dried (Na<sub>2</sub>SO<sub>4</sub>), filtered, and concentrated *in vacuo* to give crude **16b** as a colorless oil. The crude material was purified via silica gel flash column chromatography eluting with a gradient hexanes : ethyl acetate (3 : 1 → 1 : 1 along a gradient) to give 340 mg (62%) of **16b** as an opaque viscous oil. <sup>1</sup>H NMR (400 MHz) (1:1 rotamer mixture) δ 8.69 (brs, 0.5 H), 8.54 (brs, 0.5 H), 7.57 (dd, *J* = 8.0, 0.4 Hz, 1 H), 7.35 (d, *J* = 8.0 Hz, 0.5 H), 7.32 (d, *J* = 8.0 Hz, 0.5 H), 7.20 - 7.06 (comp, 2 H), 7.00 - 6.95 (comp, 1.5 H), 6.85 (dq, *J* = 14.2, 6.8 Hz, 0.5 H), 6.32 (dd, *J* = 14.2, 1.6 Hz, 0.5 H), 5.98 (dd, *J* = 14.2, 1.6 Hz, 0.5 H), 4.38 (t, *J* = 6.0 Hz, 0.5 H), 4.33 (t, *J* = 6.0 Hz, 0.5 H), 3.50 - 3.39 (comp, 3 H), 3.36 - 3.28 (comp, 7 H), 2.77 (app q, *J* = 7.2 Hz, 2 H), 2.01 (q, *J* = 7.2 Hz, 2 H), 1.90 - 1.83 (comp, 3.5 H), 1.68 (dd, *J* = 6.8, 1.6 Hz, 1.5 H); <sup>13</sup>C NMR (400 MHz) (1:1 rotamer mixture) δ 166.5, 166.4, 141.8, 141.5, 136.6, 136.4, 127.4, 127.2, 121.9, 121.8, 121.6, 121.5, 119.1, 118.9, 118.7, 118.6, 115.3, 114.6, 111.3, 111.2, 102.9, 102.2, 53.2, 53.0, 48.0, 46.5, 43.6, 42.3, 32.5, 31.0, 29.6, 28.0, 22.6, 22.3, 18.3, 18.0; HRMS (ESI) *m/z* calcd for C<sub>20</sub>H<sub>28</sub>N<sub>2</sub>O<sub>2</sub> (M+Na)<sup>+</sup>, 367.1992; found, 367.1994.

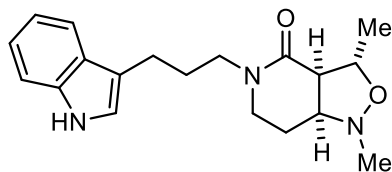

**S6**

**(3R,3aR,7aS)-5-(3-(1H-Indol-3-yl)propyl)-1,3-dimethylhexahydroisoxazolo[4,3-c]pyridin-4(1H)-one (S6).** A solution of trifluoroacetic acid (5 drops) and **16b** (50 mg, 0.14 mmol) in TFE/water (3 : 1, 4 mL) was stirred for 1 h at room temperature. Saturated aqueous NaHCO<sub>3</sub> (10 mL) was added, the layers were separated, and the aqueous layer was extracted with CH<sub>2</sub>Cl<sub>2</sub> (3 x 20 mL). The combined organic fractions were dried (Na<sub>2</sub>SO<sub>4</sub>), filtered, and concentrated *in vacuo*. The crude mixture was dissolved in toluene (2 mL), followed by the addition of N-methylhydroxylamine hydrochloride (18 mg, 0.22 mmol) and triethylamine (37 mg, 0.36 mmol). The reaction was heated under reflux for 1.5 h. After cooling the to room temperature, the reaction was partitioned between saturated aqueous NaHCO<sub>3</sub> (10 mL), ethyl acetate (20 mL), and methanol (1 mL). The layers were separated, and the aqueous layer was extracted with ethyl acetate (3 x 20 mL). The combined organic fractions were washed successively with water (40 mL) and brine (40 mL), dried (Na<sub>2</sub>SO<sub>4</sub>), filtered, and concentrated *in vacuo* to give 49 mg (quant) of **16b** as an oil of ~80 – 90% purity, as judged by <sup>1</sup>H NMR. The crude material was taken up in aqueous HCl (1 M, 10 mL), and washed with ether (2 x 10 mL). The aqueous fraction was basified to pH 12-14 by dropwise addition of aqueous NaOH (40% w/v), as judged by pH paper. The basic solution was extracted with CH<sub>2</sub>Cl<sub>2</sub> (2 x 30 mL) and ethyl acetate (2 x 30 mL). The combined organic fractions were dried (Na<sub>2</sub>SO<sub>4</sub>), filtered, and concentrated *in vacuo* to give 33 mg (68%) of **16b** as a colorless oil. <sup>1</sup>H NMR (400 MHz) δ 8.24 (brs, 1 H), 7.57 (d, *J* = 7.6 Hz, 1 H), 7.35 (dt, *J* = 8.4, 1.2 Hz, 1 H), 7.18 (ddd, *J* = 8.4, 7.2, 1.2, 1 H), 7.10 (ddd, *J* = 8.0, 7.2, 1.2 Hz, 1 H), 7.03 (d, *J* = 2.0 Hz, 1 H), 3.94 (dq, *J* = 7.2, 6.0 Hz, 1 H), 3.68 - 3.55 (comp, 2 H), 3.44 - 3.37 (m, 1 H), 3.07 (dt, *J* = 12.4, 4.0 Hz, 1 H), 2.91 - 2.87 (m, 1 H), 2.84 - 2.70 (comp, 3 H), 2.69 (s, 3 H), 2.00 - 1.85 (comp, 3 H), 1.71 (dq, *J* = 14.4, 3.6 Hz, 1 H), 1.47 (d, *J* = 6.0 Hz, 3 H); <sup>13</sup>C NMR (100 MHz) δ 169.0, 136.4, 127.3, 121.8, 121.5, 119.1, 118.7, 115.4, 111.1, 77.6, 66.1, 55.4, 47.3, 46.0, 43.2, 27.6, 25.2, 22.4, 19.2; HRMS (ESI) *m/z* calcd for C<sub>19</sub>H<sub>25</sub>N<sub>3</sub>O<sub>2</sub> (M+Na)<sup>+</sup>, 350.1839; found, 350.1845.

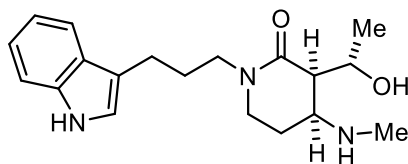

**S7**

**(3R,4S)-1-(3-(1H-Indol-3-yl)propyl)-3-((R)-1-hydroxyethyl)-4-(methylamino)piperidin-2-one (S7).** A suspension of zinc (dust, 7.0 g, 84 mmol) and **S6** (1.4 g, 4.2 mmol) in acetic acid (aq 80%, 200 mL)

was stirred for 3 h at 65 °C, at which point the reaction was cooled to room temperature. Excess zinc was removed via vacuum filtration and washed with ethyl acetate (200 mL), whereupon zinc acetate immediately precipitated out of solution as a fluffy white solid. The zinc acetate was removed by vacuum filtration and washed with ethyl acetate. The combined filtrate and washes were concentrated *in vacuo*. The resulting residue was dissolved in aqueous HCl (1 M, 300 mL), and washed with ether (150 mL). The aqueous fraction was basified to pH ~14 with solid NaOH, and extracted with CH<sub>2</sub>Cl<sub>2</sub> (3 x 300 mL). The combined organic fractions were washed with brine (200 mL), dried (Na<sub>2</sub>SO<sub>4</sub>), filtered, and concentrated *in vacuo*. The crude mixture was purified via silica gel flash column chromatography eluting with CH<sub>2</sub>Cl<sub>2</sub> : methanol (98 : 2 → 9 : 1 along a gradient) to give 791 mg (57%) of **S7** as a yellow oil. <sup>1</sup>H NMR (500 MHz, CD<sub>3</sub>OD) δ 7.51 (dt, *J* = 8.0, 1.5 Hz, 1 H), 7.30 (dt, *J* = 8.5, 1.0 Hz, 1 H), 7.06 (ddd, *J* = 8.5, 7.0, 1.5 Hz, 1 H), 7.03 (s, 1 H), 6.97 (ddd, *J* = 8.0, 7.0, 1.5 Hz, 1 H), 4.41 (t, *J* = 6.2 Hz, 1 H), 3.54 (ddd, *J* = 13.4, 8.4, 6.8 Hz, 1 H), 3.38 (ddd, *J* = 12.7, 7.5, 6.3 Hz, 1 H), 3.28 - 3.20 (comp, 2 H), 3.16 (p, *J* = 3.8 Hz, 1 H), 2.75 (t, *J* = 7.4 Hz, 2 H), 2.37 (s, 3 H), 2.34 (dd, *J* = 5.9, 4.1 Hz, 1 H), 2.09 - 2.02 (m, 1 H), 1.99 - 1.93 (comp, 2 H), 1.79 (dtd, *J* = 14.3, 7.4, 3.6 Hz, 1 H), 1.25 (d, *J* = 6.2 Hz, 3 H); <sup>13</sup>C NMR (125 MHz, CD<sub>3</sub>OD) δ 171.2, 138.2, 128.7, 122.8, 122.2, 119.4, 119.3, 115.7, 112.2, 67.4, 56.1, 51.4, 48.3, 45.0, 33.7, 28.4, 25.2, 23.7, 22.3; HRMS (ESI) *m/z* calcd for C<sub>19</sub>H<sub>27</sub>N<sub>3</sub>O<sub>2</sub> (M+Na)<sup>+</sup>, 352.1995; found, 352.2000.

**(3*R*,4*S*)-1-(3-(1*H*-Indol-3-yl)propyl)-4-((3,5-dichlorobenzyl)(methylamino)-3-((*R*)-1-hydroxyethyl)piperidin-2-one (14j)**. A solution of **S7** (100 mg, 0.30 mmol) and 3,5-dichlorobenzaldehyde (159 mg, 0.91 mmol) in acetonitrile (2 mL) was heated under reflux for 2 h. The reaction was cooled to room temperature, at which time NaBH<sub>3</sub>CN (22 mg, 0.35 mmol) and acetic acid (glacial, 53 μL, 0.89 mmol) were added. The reaction was stirred for 20 h at room temperature, then partitioned between aqueous NaOH (1 M, 15 mL) and CH<sub>2</sub>Cl<sub>2</sub> (30 mL). The two phases were separated, and the aqueous phase was extracted with CH<sub>2</sub>Cl<sub>2</sub> (2 x 15 mL). The combined organic fractions were washed with brine (15 mL), dried (Na<sub>2</sub>SO<sub>4</sub>), filtered, and concentrated *in vacuo*. The crude material was purified via silica gel flash column chromatography eluting with hexanes : ethyl acetate (1 : 1 → 0 : 1 along a gradient) to give 30 mg (20%) of **14j** as an amorphous white solid. <sup>1</sup>H NMR (400 MHz) δ 8.10 (brs, 1 H), 7.57 (d, *J* = 7.6 Hz, 1 H), 7.36 (dt, *J* = 8.4, 0.8 Hz, 1 H), 7.27 (t, *J* = 2.0 Hz, 1 H), 7.21 - 7.17 (m, 1 H), 7.14 (d, *J* = 2.0 Hz, 2 H), 7.11 (ddd, *J* = 8.0, 7.2, 0.8 Hz, 1 H), 7.04 (d, *J* = 2.0 Hz, 1 H), 7.33 (dq, *J* = 8.8, 6.4 Hz, 1 H), 3.62 - 3.55 (comp, 2 H), 3.45 (d, *J* = 13.2 Hz, 1 H), 3.39 - 3.24 (comp, 3 H), 3.14 (dt, *J* = 10.4, 5.6 Hz, 1 H), 2.77 (t, *J* = 7.2 Hz, 2 H), 2.70 (dd, *J* = 8.4, 5.6 Hz, 1 H), 2.16 (s, 3 H), 2.13 - 2.05 (comp, 2 H), 1.99 - 1.92 (comp, 2 H), 1.34 (d, *J* = 6.0 Hz, 3 H); <sup>13</sup>C NMR (100 MHz) δ 169.9, 141.2, 136.3, 135.2, 127.8, 127.3, 127.1, 121.9, 121.4, 119.2, 118.7, 115.4, 111.2, 66.5, 60.3, 57.9, 50.2, 46.6, 44.9, 39.5, 27.5, 22.5, 22.5, 21.8; HRMS (ESI) *m/z* calcd for C<sub>26</sub>H<sub>31</sub>Cl<sub>2</sub>N<sub>3</sub>O<sub>2</sub> (M+Na)<sup>+</sup>, 510.1686 and 512.1662; found, 510.1690 and 512.1695.

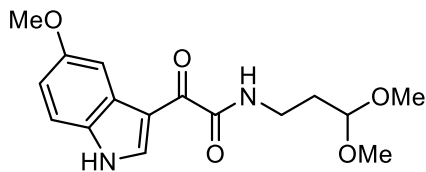

**S8**

***N*-(3,3-Dimethoxypropyl)-2-(5-methoxy-1*H*-indol-3-yl)-2-oxoacetamide (S8).** Oxalyl chloride (0.95 g, 7.5 mmol) was added dropwise over 10 min to a solution of 5-methoxyindole (1.0 g, 6.8 mmol) in ether (15 mL) at 0 °C, whereupon a red precipitate immediately crashed out of solution and the resulting suspension was stirred for 1 h at room temperature. The precipitate was collected via vacuum filtration, and dried *in vacuo* to give 1.21 g (75%) of 5-methoxyindole-3-glyoxal chloride as a red powder. A slurry of 5-methoxyindole-3-glyoxal chloride (1.20 g, 5.1 mmol) in CH<sub>2</sub>Cl<sub>2</sub> (10 mL) was added dropwise over 10 min to a solution of **9** (1.0 g, 5.1 mmol) and triethylamine (1.3 g, 13 mmol) in CH<sub>2</sub>Cl<sub>2</sub> (50 mL) at 0 °C, and the reaction was stirred for 2 h at room temperature. Saturated aqueous NaHCO<sub>3</sub> (50 mL) was added, the two phases were separated, and the aqueous phase extracted with CH<sub>2</sub>Cl<sub>2</sub> (3 x 100 mL). The combined organic fractions were washed with water (100 mL), brine (100 mL), dried (Na<sub>2</sub>SO<sub>4</sub>), filtered, and concentrated *in vacuo* to give 1.59 g (98%) of **S8** as a pale-yellow, amorphous solid of (>95% purity, by <sup>1</sup>H NMR). <sup>1</sup>H NMR (400 MHz) δ 9.10 (brs, 1 H), 9.03 (d, *J* = 3.2 Hz, 1 H), 7.93 (d, *J* = 2.5 Hz, 1 H), 7.87 (t, *J* = 5.3 Hz, 1 H), 7.32 (d, *J* = 8.8 Hz, 1 H), 6.93 (dd, *J* = 8.8, 2.5 Hz, 1 H) 4.50 (t, *J* = 5.4 Hz, 1 H), 3.90 (s, 3 H), 3.49 (t, *J* = 6.1 Hz, 2 H), 3.39 (s, 6 H), 1.92 (q, *J* = 5.8 Hz, 2 H); <sup>13</sup>C NMR (125 MHz) δ 180.6, 162.5, 156.9, 138.2, 130.4, 127.6, 114.3, 113.2, 112.4, 103.9, 103.6, 55.8, 53.4, 35.2, 31.8; HRMS (ESI) *m/z* calcd for C<sub>16</sub>H<sub>20</sub>N<sub>2</sub>O<sub>5</sub> (M+Na)<sup>+</sup>, 343.1264; found, 343.1264.

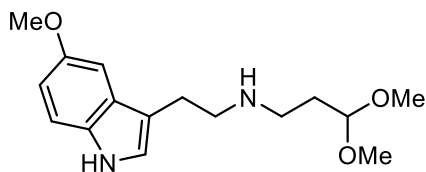

**S9**

**3,3-Dimethoxy-*N*-(2-(5-Methoxy-1*H*-indol-3-yl)ethyl)propan-1-amine (S9).**

A solution of **S8** (200 mg, 0.62 mmol) in THF (5 mL) was added dropwise over 5 min to a suspension of lithium aluminum hydride (230 mg, 6.2 mmol) in THF (15 mL) at 0 °C. The reaction heated to 65 °C for 14 h. The reaction was then cooled to 0 °C, and the Fieser work-up was performed by successive addition of water (0.25 mL), aqueous NaOH (15%, 0.25 mL), and water (1 mL). The suspension was warmed to room temperature, and MgSO<sub>4</sub> was added. The solids were removed by vacuum filtration through a fritted funnel and washed with copious amounts of CH<sub>2</sub>Cl<sub>2</sub>. The filtrate was concentrated *in vacuo* to give crude

**S9** as an opaque viscous oil. The crude material was purified via acid/base extraction. The crude oil was taken up into aqueous HCl (0.2 M, 100 mL) and washed with ether (2 x 75 mL). The aqueous fraction was basified to pH 12 - 14 by dropwise addition of aqueous NaOH (40% w/v). The basic solution was extracted with CH<sub>2</sub>Cl<sub>2</sub> (4 x 100 mL). The combined organic fractions were washed with saturated aqueous NaHCO<sub>3</sub> (200 mL), water (200 mL), brine (200 mL), dried (Na<sub>2</sub>SO<sub>4</sub>), filtered, and concentrated *in vacuo* to give 164 mg (90%) of **S9** as an oil (>95% purity, by <sup>1</sup>H NMR). <sup>1</sup>H NMR (400 MHz) δ 8.58 (brs, 1 H), 7.23 (dd, *J* = 8.0, 0.5 Hz, 1 H), 7.05 (d, *J* = 2.4 Hz, 1 H), 6.99 (d, *J* = 2.4 Hz, 1 H), 6.83 (dd, *J* = 8.0, 2.4 Hz, 1 H), 4.38 (t, *J* = 5.6 Hz, 1 H), 3.85 (s, 3 H), 3.24 (s, 6 H), 2.95 (app s, 4 H), 2.72 (t, *J* = 7.2 Hz, 2 H), 1.80 (td, *J* = 7.2, 5.6 Hz, 2 H); <sup>13</sup>C NMR (100 MHz) δ 153.8, 131.6, 127.7, 123.0, 113.0, 112.1, 111.9, 103.6, 100.6, 55.9, 53.0, 49.8, 45.2, 32.5, 25.4; HRMS (ESI) *m/z* calcd for C<sub>16</sub>H<sub>24</sub>N<sub>2</sub>O<sub>3</sub> (M+H)<sup>+</sup>, 293.1860; found, 293.1870.

**(E)-N-(3,3-Dimethoxypropyl)-N-(2-(5-methoxy-1H-indol-3-yl)ethyl)but-2-enamide (18a).**

Crotonoyl chloride (0.53 g, 5.1 mmol) was added dropwise over 5 min to a solution of **S9** (1.2 g, 4.2 mmol) and Hünig's base (1.3 g, 11 mmol) in CH<sub>2</sub>Cl<sub>2</sub> (42 mL) at -78 °C. The reaction was stirred for 2 h at -78 °C. Saturated aqueous NaHCO<sub>3</sub> (40 mL) was added and the mixture was stirred for 20 min at room temperature. The phases were separated, and the aqueous phase was extracted with CH<sub>2</sub>Cl<sub>2</sub> (3 x 40 mL). The combined organic fractions were washed with saturated aqueous NH<sub>4</sub>Cl (100 mL), water (100 mL), brine (100 mL), dried (Na<sub>2</sub>SO<sub>4</sub>), filtered, and concentrated *in vacuo*. The crude material was purified via silica gel flash column chromatography eluting with hexanes : ethyl acetate (1 : 1 → 1 : 2 along a gradient) to give 1.08 g (71%) of **18a** as an oil: <sup>1</sup>H NMR (400 MHz) (1:1 mixture of rotamers) δ 8.78 (brs, 0.5 H), 8.65 (brs, 0.5 H), 7.21 (app t, *J* = 8.9 Hz, 1H), 7.11 (d, *J* = 2.2 Hz, 0.5 H), 7.05 - 6.74 (comp, 3.5 H), 6.30 (dd, *J* = 14.9, 1.6 Hz, 0.5 H), 6.02 (dd, *J* = 14.9, 1.6 Hz, 0.5 H), 4.39 (t, *J* = 5.6 Hz, 0.5 H), 4.31 (t, *J* = 5.6 Hz, 0.5 H), 3.87 (s, 1.5 H), 3.84 (s, 1.5 H), 3.66 (t, *J* = 7.1 Hz, 1 H), 3.61 (t, *J* = 7.1 Hz, 1 H), 3.44 (t, *J* = 7.3 Hz, 1 H), 3.35 (t, *J* = 7.3 Hz, 1 H), 3.30 (s, 3 H), 3.28 (s, 3 H), 3.01 (t, *J* = 7.1 Hz, 1 H), 2.96 (t, *J* = 7.1 Hz, 1 H) 1.94 - 1.79 (comp, 3.5 H), 1.66 (dd, *J* = 6.8, 1.4 Hz, 1.5 H); <sup>13</sup>C NMR (100 MHz) (1:1 mixture of rotamers) δ 166.7, 166.5, 154.0, 153.8, 141.9, 141.0, 131.6, 131.5, 127.8, 127.5, 123.3, 122.9, 121.8, 121.7, 112.7, 112.2, 112.1, 112.0, 111.4, 102.9, 102.1, 100.5, 100.1, 55.9, 55.9, 53.1, 53.0, 48.6, 47.7, 44.2, 42.9, 32.5, 30.9, 25.4, 23.7, 18.3, 18.0; HRMS (ESI) *m/z* calcd for C<sub>20</sub>H<sub>28</sub>N<sub>2</sub>O<sub>4</sub> (M+Na)<sup>+</sup>, 383.1941; found, 383.1943.

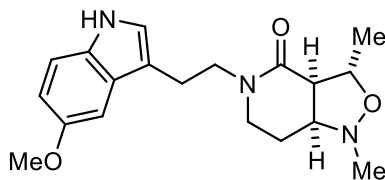

**S10**

**(3R,3aR,7aS)-5-(2-(5-Methoxy-1H-indol-3-yl)ethyl)-1,3-dimethylhexahydroisoxazolo[4,3-c]pyridin-4(1H)-one (S10).** A solution of **18a** (250 mg, 0.69 mmol) and TFA (5 drops) in a mixture of TFE/water (3 : 1, 12 mL) was stirred for 1 h at room temperature. The reaction was poured into saturated aqueous NaHCO<sub>3</sub> (30 mL), and extracted with CH<sub>2</sub>Cl<sub>2</sub> (3 x 50 mL). The combined organic fractions were washed with water (50 mL), dried (Na<sub>2</sub>SO<sub>4</sub>), filtered, and concentrated *in vacuo*. The resulting residue was dissolved in toluene (10 mL), followed by the addition of *N*-methylhydroxylamine hydrochloride (86 mg, 1.0 mmol) and triethylamine (175 mg, 1.73 mmol). The reaction was heated under reflux for 2 h, whereupon the mixture was cooled to room temperature, and partitioned between saturated aqueous NaHCO<sub>3</sub> (50 mL), ethyl acetate (50 mL) and methanol (2 mL). The phases were separated, and the aqueous phase was extracted with ethyl acetate (3 x 50 mL). The combined organic fractions were washed with water (100 mL), brine (100 mL), dried (Na<sub>2</sub>SO<sub>4</sub>), filtered, and concentrated *in vacuo* to give 202 mg (85%) of **S10** as a viscous oil (>95% purity, by <sup>1</sup>H NMR). <sup>1</sup>H NMR (400 MHz) δ 8.11 (brs, 1 H), 7.25 (d, *J* = 8.8 Hz, 1 H), 7.07 (d, *J* = 2.4 Hz, 1 H), 7.01 (d, *J* = 2.1 Hz, 1 H), 6.85 (dd, *J* = 8.8, 2.4 Hz, 1 H), 3.92 - 3.87 (comp, 4 H), 3.76 (dt, *J* = 13.3, 7.7 Hz, 1 H), 3.65 (dt, *J* = 13.3, 7.0 Hz, 1 H), 3.56 (td, *J* = 11.8, 3.0 Hz, 1 H), 3.01 - 2.95 (comp, 3 H), 2.87 - 2.79 (comp, 2 H), 2.66 (s, 3 H), 1.79 (tt, *J* = 11.2, 4.2 Hz, 1 H), 1.61 (dq, *J* = 11.2, 3.4 Hz, 1 H), 1.46 (d, *J* = 6.1 Hz, 3 H); <sup>13</sup>C NMR (100 MHz) δ 169.1, 154.0, 131.6, 127.8, 123.0, 112.5, 112.13, 112.06, 100.7, 77.5, 66.2, 56.1, 55.4, 48.5, 44.1, 43.3, 25.1, 23.5, 19.4; HRMS (ESI) *m/z* calcd for C<sub>19</sub>H<sub>25</sub>N<sub>3</sub>O<sub>3</sub> (M+Na)<sup>+</sup>, 366.1788; found, 266.1794.

**(3R,4S)-3-((R)-1-Hydroxyethyl)-1-(2-(5-methoxy-1H-indol-3-yl)ethyl)-4-(methylamino)piperidin-2-one (19a).** Zinc (powder, 588 mg, 9.00 mmol) was added in three portions over 1.5 h to a solution of **S10** (100 mg, 0.30 mmol) in acetic acid (aq 80%, 20 mL) at 60 °C. The reaction was stirred for 1 h at 60 °C. The suspension was cooled to room temperature, excess zinc was filtered and washed with ethyl acetate. To the filtrate was added ethyl acetate (100 mL), upon which zinc acetate immediately precipitated out of solution as a fluffy white solid. The zinc acetate was filtered and washed with ethyl acetate, and the solvent was removed *in vacuo*. The crude material was taken up in aqueous HCl (1 M, 30 mL), and washed with ether (2 x 30 mL). The aqueous fraction was basified to pH ~14 with aqueous NaOH (40% w/v), and extracted with CH<sub>2</sub>Cl<sub>2</sub> (4 x 50 mL). The organic fractions were washed with saturated aqueous NaHCO<sub>3</sub> (100 mL), water (100 mL), and brine (1 x 100 mL). The organic fractions were dried (Na<sub>2</sub>SO<sub>4</sub>), filtered, and concentrated *in vacuo* to give 86 mg (85%) of **19a** as an oil (>95% purity, by <sup>1</sup>H



NMR).  $^1\text{H}$  NMR (400 MHz,  $\text{CD}_3\text{OD}$ )  $\delta$  7.22 (d,  $J = 8.8$  Hz, 1 H), 7.08 (d,  $J = 2.3$  Hz, 1 H), 7.04 (s, 1 H), 6.75 (dd,  $J = 8.8, 2.3$  Hz, 1 H), 4.40 (p,  $J = 6.2$  Hz, 1 H), 3.83 (s, 3 H), 3.71 - 3.65 (m, 1 H), 3.52 (dt,  $J = 13.2, 7.2$  Hz, 1 H), 3.14 - 2.92 (comp, 5 H), 2.38 (dd,  $J = 5.8, 4.1$  Hz, 1 H), 2.33 (s, 3 H), 1.97 (dq,  $J = 13.7, 6.1$  Hz, 1 H), 1.70 (dtd,  $J = 13.7, 6.9, 3.5$  Hz, 1 H), 1.23 (d,  $J = 6.4$  Hz, 3 H);  $^{13}\text{C}$  NMR (100 MHz,  $\text{CD}_3\text{OD}$ )  $\delta$  169.7, 135.6, 131.9, 127.8, 123.0, 111.6, 111.4, 111.2, 99.9, 66.1, 54.9, 54.6, 50.0, 48.2, 44.3, 32.2, 23.6, 22.3, 21.0; HRMS (ESI)  $m/z$  calcd for  $\text{C}_{19}\text{H}_{27}\text{N}_3\text{O}_3$  ( $\text{M}+\text{H}$ ) $^+$ , 346.2125; found, 346.2124.

**(3*R*,4*S*)-4-((3,5-Dichlorobenzyl)(methyl)amino)-3-((*R*)-1-hydroxyethyl)-1-(2-(5-methoxy-1*H*-indol-3-yl)ethyl)piperidin-2-one (14k)**. Prepared according to the representative procedure for compound **14a**. The crude material was purified via silica gel flash column chromatography eluting with hexanes : ethyl acetate (3 : 1  $\rightarrow$  1 : 3 along a gradient) to give 97 mg (89%) of **14k** as a white solid.  $^1\text{H}$  NMR (600 MHz,  $\text{CD}_3\text{OD}$ )  $\delta$  7.34 (t,  $J = 1.9$  Hz, 1 H), 7.22 - 7.21 (comp, 3 H), 7.07 (d,  $J = 2.1$  Hz, 1 H), 7.04 (s, 1 H), 6.76 (ddd,  $J = 8.7, 2.4, 0.3$  Hz, 1 H), 4.22 (dq,  $J = 8.7, 6.1$ , 1 H), 3.82 (s, 3 H), 3.76 (dt,  $J = 13.3, 7.6$  Hz, 1 H), 3.55 (ddd,  $J = 13.4, 7.7, 5.8$  Hz, 1 H), 3.50 (d,  $J = 13.4$  Hz, 1 H), 3.41 (d,  $J = 13.4$  Hz, 1 H), 3.36 - 3.32 (m, 1 H), 3.17 - 3.08 (comp, 2 H), 3.02 (p,  $J = 7.2$  Hz, 1 H), 2.93 (ddd,  $J = 13.7, 7.8, 5.9$  Hz, 1 H), 2.58 (dd,  $J = 8.4, 5.7$  Hz, 1 H), 2.07 (s, 3 H), 1.99 (dt,  $J = 12.3, 5.7$  Hz, 1 H), 1.96 - 1.91 (m, 1 H), 1.21 (d,  $J = 6.1$  Hz, 3 H);  $^{13}\text{C}$  NMR (150 MHz,  $\text{CD}_3\text{OD}$ )  $\delta$  172.0, 155.0, 143.7, 136.2, 133.4, 129.2, 128.5, 128.5, 124.5, 113.0, 112.6, 112.6, 101.5, 67.7, 61.2, 58.4, 56.4, 51.2, 48.8, 46.6, 38.5, 24.0, 22.8, 22.5; HRMS (ESI)  $m/z$  calcd for  $\text{C}_{26}\text{H}_{31}\text{Cl}_2\text{N}_3\text{O}_3$  ( $\text{M}+\text{H}$ ) $^+$ , 504.1815 and 506.1792; found, 504.1815 and 506.1795.

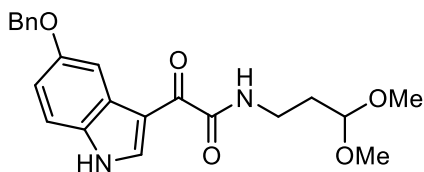

**S11**

**2-(5-(Benzyloxy)-1*H*-indol-3-yl)-*N*-(3,3-dimethoxypropyl)-2-oxoacetamide (S11)**. Oxalyl chloride (1.3 g, 9.9 mmol) was added dropwise over 10 min to a solution of 5-benzyloxyindole (2.0 g, 9.0 mmol) in ether (18 mL) at 0 °C. The solution was stirred for 2 h at 0 °C, whereupon a red precipitate was isolated via vacuum filtration, and dried *in vacuo* to give 2.37 g (84%) of 5-benzyloxyindole-3-glyoxal chloride. A suspension of 5-benzyloxyindole-3-glyoxal chloride (0.97 g, 3.1 mmol) in  $\text{CH}_2\text{Cl}_2$  (10 mL) was added dropwise over 10 min to a solution of **9** (0.62 g, 3.1 mmol) and triethylamine (0.78 g, 7.8 mmol) in  $\text{CH}_2\text{Cl}_2$  (30 mL) at 0 °C. The reaction was stirred for 2 h at 0 °C. The reaction was poured into saturated aqueous  $\text{NaHCO}_3$  (40 mL), the phases were separated, and the aqueous phase was extracted with  $\text{CH}_2\text{Cl}_2$  (3 x 40 mL). The combined organic fractions were washed with water (100 mL) and brine (100 mL), dried ( $\text{Na}_2\text{SO}_4$ ), filtered, and concentrated *in vacuo* to give 1.16 (95%) of **S11** as a yellow amorphous solid (>95%

purity, by  $^1\text{H}$  NMR).  $^1\text{H}$  NMR (400 MHz)  $\delta$  9.16 (brs, 1 H), 9.03 (d,  $J = 2.8$  Hz, 1 H), 8.05 (d,  $J = 2.5$  Hz, 1 H), 7.88 (t,  $J = 5.6$  Hz, 1 H), 7.50 (d,  $J = 7.1$  Hz, 2 H), 7.40 (t,  $J = 7.1$  Hz, 2 H), 7.35 - 7.32 (comp, 2 H), 7.02 (dd,  $J = 8.7, 2.5$  Hz, 1 H), 5.16 (s, 2 H), 4.51 (t,  $J = 5.4$  Hz, 1 H), 3.59 (q,  $J = 6.7$  Hz, 2 H), 3.39 (s, 6 H), 1.93 (q,  $J = 6.7$  Hz, 2 H);  $^{13}\text{C}$  NMR (100 MHz,  $\text{CD}_3\text{CN}$ )  $\delta$  181.5, 162.9, 155.9, 139.2, 138.0, 131.3, 128.7, 128.1, 127.9, 126.3, 114.4, 113.4, 112.7, 105.2, 103.7, 70.3, 53.0, 35.1, 32.3; HRMS (ESI)  $m/z$  calcd for  $\text{C}_{22}\text{H}_{24}\text{N}_2\text{O}_5$  ( $\text{M}+\text{Na}$ ) $^+$ , 419.1577; found, 419.1575.

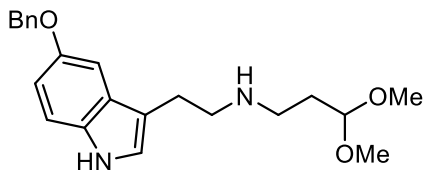

**S12**

***N*-(2-(5-(Benzyloxy)-1*H*-indol-3-yl)ethyl)-3,3-dimethoxypropan-1-amine (S12).** A solution of **S11** (1.16 g, 2.93 mmol) in THF (15 mL) was added dropwise over 20 min to a suspension of lithium aluminum hydride (1.10 g, 29.3 mmol) in THF (70 mL) at 0 °C. The reaction heated under reflux for 14 h, whereupon the reaction was cooled to 0 °C, and the Fieser work-up was performed by successive addition of water (1.1 mL), aqueous NaOH (15%, 1.1 mL), and water (3.3 mL). The suspension was warmed to room temperature and  $\text{MgSO}_4$  was added. The solids were removed by vacuum filtered through a fritted funnel, and washed with copious amounts of  $\text{CH}_2\text{Cl}_2$ . The filtrate was concentrated *in vacuo* to give crude **S12** as an opaque viscous oil. The crude oil was taken up into aqueous HCl (0.2 M, 200 mL) and washed with ether (2 x 150 mL). The aqueous fraction was basified to pH 12-14 by addition of solid NaOH, as judged by pH paper. The basic solution was extracted with  $\text{CH}_2\text{Cl}_2$  (4 x 200 mL). The combined organic fractions were washed with saturated aqueous  $\text{NaHCO}_3$  (400 mL), water (400 mL), brine (400 mL), dried ( $\text{Na}_2\text{SO}_4$ ), filtered, and concentrated *in vacuo* to give 1.02 g (94%) of **S12** as an oil (>95% purity, by  $^1\text{H}$  NMR).  $^1\text{H}$  NMR (400 MHz)  $\delta$  8.41 (brs, 1 H), 7.49 (d,  $J = 7.2$  Hz, 2 H), 7.34 (td,  $J = 7.2, 1.6$  Hz, 2 H), 7.33 (tt,  $J = 7.2, 1.6$  Hz, 1 H), 7.23 (d,  $J = 8.8$  Hz, 1 H), 7.16 (d,  $J = 2.4$  Hz, 1 H), 6.97 (d,  $J = 2.0$  Hz, 1 H), 6.94 (dd,  $J = 8.8, 2.4$  Hz, 1 H), 5.11 (s, 2 H), 4.41 (t,  $J = 5.6$  Hz, 1 H), 3.28 (s, 6 H), 2.94 (app s, 4 H), 2.72 (t,  $J = 7.2$  Hz, 2 H), 1.82 (td,  $J = 7.2, 5.6$  Hz, 2 H);  $^{13}\text{C}$  NMR (100 MHz)  $\delta$  153.0, 137.7, 131.8, 128.5, 127.82, 127.77, 127.6, 123.0, 113.5, 112.8, 111.9, 103.6, 102.5, 71.0, 52.9, 49.9, 45.3, 32.8, 25.7; HRMS (CI)  $m/z$  calcd for  $\text{C}_{22}\text{H}_{28}\text{N}_2\text{O}_3$  ( $\text{M}+\text{H}$ ) $^+$ , 369.2178; found, 369.2181.

***(E)*-*N*-(2-(5-(Benzyloxy)-1*H*-indol-3-yl)ethyl)-*N*-(3,3-dimethoxypropyl)but-2-enamide (18b).** Crotonoyl chloride (0.35 g, 3.3 mmol) was added dropwise over 5 min to a solution of **S12** (1.0 g, 2.8 mmol) and Hünig's base (0.85 g, 6.6 mmol) in  $\text{CH}_2\text{Cl}_2$  (30 mL) at -78 °C. The reaction was stirred for 2 h at -78 °C, whereupon saturated aqueous  $\text{NaHCO}_3$  (30 mL) was added, and the resulting solution was stirred

for 20 min at room temperature. The phases were separated, and the aqueous phase was extracted with CH<sub>2</sub>Cl<sub>2</sub> (3 x 30 mL). The combined organic fractions were washed with, water (50 mL), brine (50 mL), dried (Na<sub>2</sub>SO<sub>4</sub>), filtered, and concentrated *in vacuo*. The crude material was purified via silica gel flash column chromatography eluting with hexanes : ethyl acetate (2 : 1 → 1 : 1 along a gradient) to give 0.73 g (61%) of **18b** as an oil. <sup>1</sup>H NMR (400 MHz) (1:1 mixture of rotamers) δ 8.65 (brs, 0.5 H), 8.53 (brs, 0.5), 7.50 - 7.48 (comp, 2 H), 7.41 - 7.37 (comp, 2 H), 7.34 - 7.30 (m, 1 H), 7.26 - 7.23 (comp, 1.5 H), 7.11 (d, *J* = 2.2 Hz, 0.5), 7.02 (dq, *J* = 13.8, 6.9 Hz, 0.5 H), 6.96 - 6.88 (comp, 2 H), 6.78 (dq, *J* = 13.8, 6.9 Hz, 0.5 H), 6.32 (dd, *J* = 14.9, 1.6 Hz, 0.5 H), 5.98 (dd, *J* = 14.9, 1.6 Hz, 0.5 H), 5.13 (s, 1 H), 5.10 (s, 1 H), 4.41 (t, *J* = 5.6 Hz, 0.5 H), 4.33 (t, *J* = 5.6 Hz, 0.5 H), 3.67 (t, *J* = 7.3 Hz, 1 H), 3.60 (t, *J* = 7.3 Hz, 1 H), 3.45 (t, *J* = 7.5 Hz, 1 H), 3.37 - 3.30 (comp, 7 H), 3.03 (t, *J* = 7.3 Hz, 1 H), 2.96 (t, *J* = 7.3 Hz, 1 H), 1.96 - 1.90 (comp, 2 H), 1.85 - 1.80 (comp, 1.5 H), 1.66 (dd, *J* = 6.8, 1.5 Hz, 1.5); <sup>13</sup>C NMR (100 MHz) (1:1 mixture of rotamers) δ 166.7, 166.6, 153.1, 153.1, 141.9, 141.0, 137.7, 137.6, 131.8, 131.7, 128.5, 128.5, 127.8, 127.7, 127.6, 127.5, 123.4, 123.0, 121.8, 121.8, 112.9, 112.8, 112.7, 112.0, 111.4, 102.9, 102.1, 102.0, 71.1, 70.9, 53.2, 53.0, 48.6, 47.8, 44.2, 42.9, 32.5, 31.0, 25.4, 23.7, 18.3, 18.1; HRMS (ESI) *m/z* calcd for C<sub>26</sub>H<sub>32</sub>N<sub>2</sub>O<sub>4</sub> (M+Na)<sup>+</sup>, 459.2254; found, 459.2253.

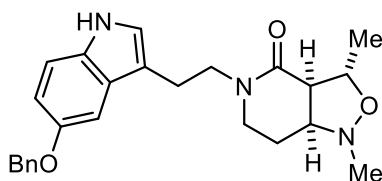

**S13**

**(3R,3aR,7aS)-5-(2-(5-(Benzyloxy)-1H-indol-3-yl)ethyl)-1,3-dimethylhexahydroisoxazolo[4,3-c]pyridin-4(1H)-one (S13).** A solution of **18b** (250 mg, 0.57 mmol) and TFA (65 mg, 0.57 mmol) in TFE/water (3 : 1, 12 mL) was stirred for 1 h at room temperature. The reaction was poured into saturated aqueous NaHCO<sub>3</sub> (30 mL), and extracted with CH<sub>2</sub>Cl<sub>2</sub> (3 x 50 mL). The combined organic fractions were washed with water (50 mL), dried (Na<sub>2</sub>SO<sub>4</sub>), filtered, and concentrated *in vacuo*. The resulting residue was dissolved in toluene (8 mL), followed by addition of *N*-methylhydroxylamine hydrochloride (71 mg, 0.86 mmol) and triethylamine (130 mg, 1.30 mmol). The reaction was heated under reflux for 2 h, then cooled to room temperature, and partitioned between saturated aqueous NaHCO<sub>3</sub> (50 mL), ethyl acetate (50 mL) and methanol (2 mL). The phases were separated, and the aqueous phase was extracted with ethyl acetate (3 x 50 mL). The combined organic fractions were washed with water (100 mL), brine (100 mL), dried (Na<sub>2</sub>SO<sub>4</sub>), filtered, and concentrated *in vacuo*. The crude material was purified via silica gel flash column chromatography eluting with hexanes : ethyl acetate (1 : 1 → 0 : 1 along a gradient) to give 163 mg (68%, two-steps) of **S13** as a viscous oil. <sup>1</sup>H NMR (400 MHz) δ 8.52 (brs, 1 H), 7.50 - 7.48 (comp, 2 H), 7.41 -

7.35 (comp, 2 H), 7.32 (tt,  $J = 7.2, 1.4$  Hz, 1 H), 7.22 (d,  $J = 8.8$  Hz, 1 H), 7.16 (d,  $J = 2.3$  Hz, 1 H), 6.95 (s, 1 H), 5.11 (s, 2 H), 3.93 (p,  $J = 6.2$  Hz, 1 H), 3.74 (dt,  $J = 13.3, 7.5$  Hz, 1 H), 3.61 (dt,  $J = 13.3, 7.2$  Hz, 1 H), 3.52 (td,  $J = 11.6, 2.5$  Hz, 1 H), 2.99 - 2.92 (comp, 3 H), 2.83 - 2.79 (comp, 2 H), 2.66 (s, 3 H), 1.76 (tt,  $J = 11.1, 4.0$  Hz, 1 H), 1.58 (dq,  $J = 11.1, 2.9$  Hz, 1 H), 1.47 (d,  $J = 6.0$  Hz, 3 H);  $^{13}\text{C}$  NMR (100 MHz)  $\delta$  169.0, 153.0, 137.7, 131.7, 128.5, 127.8, 127.7, 127.7, 123.1, 112.7, 112.4, 112.0, 102.3, 77.5, 71.0, 66.1, 55.3, 48.4, 44.0, 43.2, 25.1, 23.5, 19.3; HRMS (ESI)  $m/z$  calcd for  $\text{C}_{25}\text{H}_{29}\text{N}_3\text{O}_3$  ( $\text{M}+\text{Na}$ ) $^+$ , 442.2101; found, 442.2106.

**(3R,4S)-1-(2-(5-(Benzyloxy)-1H-indol-3-yl)ethyl)-3-((R)-1-hydroxyethyl)-4-(methylamino)piperidin-2-one (19b).** Zinc (dust, 590 mg, 9.0 mmol) was slowly added to a solution of **S13** (130 mg, 0.30 mmol) in acetic acid (aq, 80%, 18 mL), and the mixture was stirred for 48 h at room temperature. Excess zinc was filtered, and washed with ethyl acetate. To the filtrate was added ethyl acetate (200 mL), at which point zinc acetate immediately precipitated out of solution as a fluffy white solid. The zinc acetate was removed by vacuum filtration, and the solvent was removed *in vacuo*. The resulting residue was dissolved in aqueous HCl (1 M, 30 mL), and washed with ether (30 mL). The aqueous fraction was basified to pH ~12-14 by addition of solid NaOH, as judged by pH paper. The basic solution was extracted with  $\text{CH}_2\text{Cl}_2$  (3 x 50 mL), and the combined organic fractions were washed with brine (100 mL), dried ( $\text{Na}_2\text{SO}_4$ ), filtered, and concentrated *in vacuo*. The crude material was purified via silica gel flash column chromatography eluting with  $\text{CH}_2\text{Cl}_2$  : methanol (1 : 0  $\rightarrow$  9 : 1 along a gradient) to give 106 mg (85%) of **19b** as an off white solid.  $^1\text{H}$  NMR (400 MHz,  $\text{CD}_3\text{OD}$ )  $\delta$  7.48 - 7.46 (comp, 2 H), 7.38 - 7.34 (comp, 2 H), 7.29 (tt,  $J = 7.4, 1.4$  Hz, 1 H), 7.24 (dd,  $J = 8.8, 0.4$  Hz, 1 H), 7.17 (d,  $J = 2.1$  Hz, 1 H), 7.04 (s, 1 H), 6.85 (dd,  $J = 8.8, 2.1$  Hz, 1 H), 5.09 (s, 2 H), 4.27 (dq,  $J = 7.3, 6.4$  Hz, 1 H), 3.62 - 3.52 (comp, 2 H), 3.31 - 3.26 (comp, 2 H), 3.14 - 3.06 (m, 1 H), 3.03 - 2.88 (comp, 2 H), 2.54 (dd,  $J = 6.8, 3.4$  Hz, 1 H), 2.50 (s, 3 H), 2.07 - 2.01 (m, 1 H), 1.91 - 1.81 (m, 1 H), 1.24 (d,  $J = 6.3$  Hz, 3H);  $^{13}\text{C}$  NMR (100 MHz,  $\text{CD}_3\text{OD}$ )  $\delta$  169.4, 154.0, 139.4, 133.6, 129.4, 129.1, 128.7, 124.6, 113.4, 113.1, 112.6, 103.3, 72.1, 67.2, 56.6, 51.0, 49.3, 45.5, 32.5, 23.6, 23.0, 23.0; HRMS (ESI)  $m/z$  calcd for  $\text{C}_{25}\text{H}_{31}\text{N}_3\text{O}_3$  ( $\text{M}+\text{H}$ ) $^+$ , 422.2438; found, 422.2447.

**(3R,4S)-1-(2-(5-(Benzyloxy)-1H-indol-3-yl)ethyl)-4-((3,5-dichlorobenzyl)(methyl)amino)-3-((R)-1-hydroxyethyl)piperidin-2-one (14I).** Prepared according to representative procedure for compound **14a**. The crude material was purified via silica gel flash column chromatography eluting with hexanes : ethyl acetate (2 : 1  $\rightarrow$  0 : 1 along a gradient) to give 50 mg (37%) of **14I** as a white solid.  $^1\text{H}$  NMR (600 MHz)  $\delta$  8.07 (brs, 1 H), 7.47 (d,  $J = 7.5$  Hz, 2 H), 7.38 - 7.35 (comp, 2 H), 7.31 - 7.28 (m, 1 H), 7.25 - 7.23 (comp, 2 H), 7.13 (d,  $J = 2.4$  Hz, 1 H), 7.08 (d,  $J = 1.9$  Hz, 2 H), 6.99 (d,  $J = 2.3$  Hz, 1 H), 6.93 (dd,  $J = 8.7, 2.3$  Hz, 1 H), 5.11 (s, 2 H), 4.26 (dq,  $J = 8.8, 6.1$  Hz, 1 H), 3.77 (dt,  $J = 13.4, 7.7$  Hz, 1 H), 3.49 (dq,  $J = 7.8, 6.1$  Hz, 1 H), 3.42 (d,  $J = 13.3, 1$  Hz), 3.34 (d,  $J = 13.3, 1$  Hz), 3.21 (ddd,  $J = 12.8, 6.7, 2.3$  Hz, 1 H), 3.12 - 3.03 (comp, 2 H), 2.99 (p,  $J = 7.3$  Hz, 1 H), 2.91 (p,  $J = 7.3$  Hz, 1 H) 2.65 (dd,  $J = 8.7, 5.8$  Hz, 1 H), 2.07

(s, 3 H), 1.96 - 1.84 (comp, 2 H), 1.31 (d,  $J = 6.1$  Hz, 3 H);  $^{13}\text{C}$  NMR (150 MHz)  $\delta$  169.8, 153.1, 141.2, 137.6, 135.1, 131.6, 128.5, 127.8, 127.8, 127.7, 127.6, 127.1, 123.0, 112.7, 112.5, 111.9, 102.4, 71.0, 66.5, 60.3, 57.6, 50.1, 47.2, 45.3, 38.6, 23.1, 22.5, 21.8; HRMS (ESI)  $m/z$  calcd for  $\text{C}_{32}\text{H}_{35}\text{Cl}_2\text{N}_3\text{O}_3$  ( $\text{M}+\text{Na}$ ) $^+$ , 602.1948 and 604.1927; found, 602.1950 and 604.1931.

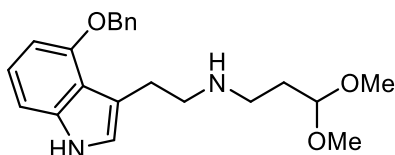

**S14**

***N*-(2-(4-(Benzyloxy)-1*H*-indol-3-yl)ethyl)-3,3-dimethoxypropan-1-amine (S14).** A solution of oxalyl chloride (0.57 g, 4.5 mmol) in ether (1 mL) was added dropwise over 20 min to a solution of 4-benzyloxyindole (1.40 g, 4.5 mmol) in ether (10 mL) at 0 °C. The reaction was stirred for 2 h at 0 °C, at which point the solution was transferred dropwise over 20 min via cannula into a solution of **9** (0.73 g, 3.7 mmol) and triethylamine (1.9 g, 19 mmol) in  $\text{CH}_2\text{Cl}_2$  (50 mL) at 0 °C. During the transfer, HCl gas was removed from the reaction through intermittent ventilation with a stream of nitrogen. The reaction was warmed to room temperature and stirred for 1 h. Saturated aqueous  $\text{NaHCO}_3$  (100 mL) was added, and the solution was stirred for 20 min at room temperature. The mixture was extracted with  $\text{CH}_2\text{Cl}_2$  (3 x 100 mL). The combined organic fractions were washed with aqueous NaOH (1 M, 100 mL), water (100 mL), brine (100 mL), dried ( $\text{Na}_2\text{SO}_4$ ), filtered, and concentrated *in vacuo* to give crude 2-(4-(benzyloxy)-1*H*-indol-3-yl)-*N*-(3,3-dimethoxypropyl)-2-oxoacetamide as a thick orange semi-solid, which was carried onto the next step without further purification.

A solution of crude 2-(4-(benzyloxy)-1*H*-indol-3-yl)-*N*-(3,3-dimethoxypropyl)-2-oxoacetamide (0.37 g, 0.93 mmol) in THF (5 mL) was added dropwise over 10 min to a suspension of lithium aluminum hydride (0.35 g, 9.3 mmol) in THF (20 mL) at 0 °C. The reaction was heated to 60 °C for 14 h. The reaction was then cooled to 0 °C, and the Fieser work-up was performed by successive addition of water (0.3 mL), aqueous NaOH (15%, 0.3 mL), and water (1 mL). The suspension was warmed to room temperature, and  $\text{MgSO}_4$  was added. The solids were removed by vacuum filtration through a fritted funnel and washed with copious amounts of  $\text{CH}_2\text{Cl}_2$ . The filtrate was concentrated *in vacuo* to give crude **S14** as an opaque viscous oil. The crude residue was taken up into aqueous HCl (0.2 M, 100 mL), and washed with ether (2 x 50 mL). The aqueous fraction was basified to pH 12-14 by dropwise addition of aqueous NaOH (40% w/v), as judged by pH paper. The basic solution was extracted with  $\text{CH}_2\text{Cl}_2$  (4 x 100 mL). The combined organic fractions were washed with saturated aqueous  $\text{NaHCO}_3$  (100 mL), water (100 mL), brine (100 mL), dried ( $\text{Na}_2\text{SO}_4$ ), filtered, and concentrated *in vacuo* to give 230 mg (67%) of **S14** as a viscous oil (>95% purity,

by  $^1\text{H}$  NMR).  $^1\text{H}$  NMR (400 MHz)  $\delta$  8.31 (brs, 1 H), 7.51 (d,  $J = 6.8$  Hz, 2 H), 7.40 (td,  $J = 6.8, 1.4$  Hz, 2 H), 7.34 (tt,  $J = 6.8, 1.4$  Hz, 1 H), 7.06 (t,  $J = 7.8$  Hz, 1 H), 6.98 (dd,  $J = 7.8$  Hz, 0.7 Hz, 1 H), 6.91 (d,  $J = 2.1$  Hz, 1 H), 6.55 (dd,  $J = 7.8, 0.7$  Hz, 1 H), 5.17 (s, 2 H), 4.38 (t,  $J = 5.6$  Hz, 1 H), 3.27 (s, 6 H), 3.06 (t,  $J = 6.8$  Hz, 2 H), 2.89 (t,  $J = 6.8$  Hz, 2 H), 2.58 (t,  $J = 7.2$  Hz, 2 H), 1.71 (td,  $J = 7.2, 5.6$  Hz, 2 H);  $^{13}\text{C}$  NMR (100 MHz)  $\delta$  153.8, 138.4, 137.5, 128.5, 127.8, 127.4, 122.7, 121.0, 117.4, 114.5, 104.7, 103.5, 100.4, 69.8, 52.7, 51.1, 45.1, 33.0, 27.4; HRMS (CI)  $m/z$  calcd for  $\text{C}_{22}\text{H}_{28}\text{N}_2\text{O}_3$  (M+H) $^+$ , 369.2178 found, 369.2180.

**(*E*)-*N*-(2-(4-(Benzyloxy)-1*H*-indol-3-yl)ethyl)-*N*-(3,3-dimethoxypropyl)but-2-enamide (18c).** Crotonoyl chloride (200 mg, 1.90 mmol) was added dropwise over 5 min to a solution of **S14** (588 mg, 1.60 mmol) and Hünig's base (495 mg, 3.80 mmol) in  $\text{CH}_2\text{Cl}_2$  (16 mL) at  $-78$  °C. The reaction was stirred for 1 h at  $-78$  °C. Saturated aqueous  $\text{NaHCO}_3$  (20 mL) was added, and the resulting solution was stirred for 20 min at room temperature. The aqueous phase was extracted with  $\text{CH}_2\text{Cl}_2$  (3 x 20 mL). The combined organic fractions were washed with water (25 mL), brine (25 mL), dried ( $\text{Na}_2\text{SO}_4$ ), filtered, and concentrated *in vacuo*. The crude material was purified via silica gel flash column chromatography eluting with hexanes : ethyl acetate (2 : 1  $\rightarrow$  1 : 1 along a gradient) to give 590 mg (86%) of **18c** as an oil.  $^1\text{H}$  NMR (400 MHz) (1:1 mixture of rotamers)  $\delta$  8.51 (brs, 1 H), 7.50 - 7.47 (comp, 2 H), 7.39 (app td,  $J = 7.0, 1.4$  Hz, 2 H), 7.35 - 7.31 (m, 1 H), 7.06 - 7.02 (comp, 1 H), 6.98 - 6.94 (comp, 1 H), 6.84 (d,  $J = 1.9$  Hz, 0.5), 6.73 (d,  $J = 1.9$  Hz, 0.5 H), 6.64 (dq,  $J = 13.6, 6.7$  Hz, 1 H), 6.57 - 6.53 (comp, 1 H), 6.26 (dd,  $J = 13.6, 1.6$  Hz, 0.5 H), 5.92 (dd,  $J = 13.6, 1.6$  Hz, 0.5 H), 5.25 (s, 1 H), 5.22 (s, 1 H), 4.32 (t,  $J = 5.7$  Hz, 0.5 H), 4.09 (t,  $J = 5.7$  Hz, 0.5 H), 3.63 - 3.59 (comp, 2 H), 3.31 - 3.27 (comp, 4 H), 3.19 (s, 3 H), 3.17 - 3.04 (comp, 3 H), 1.88 (dd,  $J = 6.8, 1.5$  Hz, 1.5 H), 1.82 (q,  $J = 7.0$  Hz, 1 H), 1.58 (q,  $J = 7.0$  Hz, 1 H), 1.50 (dd,  $J = 6.8, 1.5$  Hz, 1.5 H);  $^{13}\text{C}$  NMR (100 MHz) (1 : 1 mixture of rotamers)  $\delta$  166.8, 166.3, 153.6, 153.5, 141.3, 140.3, 138.3, 138.2, 137.5, 137.3, 128.6, 128.6, 127.9, 127.9, 127.5, 127.3, 122.8, 122.5, 121.8, 121.8, 117.4, 117.3, 113.4, 112.3, 105.0, 102.8, 101.9, 100.6, 100.4, 70.0, 69.9, 52.9, 52.8, 49.7, 48.8, 43.8, 42.7, 32.2, 30.8, 27.0, 25.2, 18.3, 18.2, 17.8; HRMS (ESI)  $m/z$  calcd for  $\text{C}_{26}\text{H}_{32}\text{N}_2\text{O}_4$  (M+Na) $^+$ , 459.2254; found, 459.2262

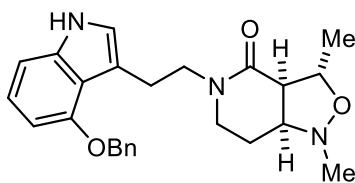

**S15**

**(3*R*,3*aR*,7*aS*)-5-(2-(4-(Benzyloxy)-1*H*-indol-3-yl)ethyl)-1,3-dimethylhexahydroisoxazolo[4,3-*c*]pyridin-4(1*H*)-one (S15).** A solution of **18c** (150 mg, 0.34 mmol) and TFA (5 drops) in TFE/water (3 : 1, 6 mL) was stirred for 1 h at room temperature. The reaction was poured into saturated aqueous  $\text{NaHCO}_3$

(20 mL), and extracted with CH<sub>2</sub>Cl<sub>2</sub> (3 x 20 mL). The combined organic fractions were washed with water (20 mL), dried (Na<sub>2</sub>SO<sub>4</sub>), filtered, and concentrated *in vacuo*. The resulting residue was dissolved in toluene (4 mL), followed by addition of *N*-methylhydroxylamine hydrochloride (34 mg, 0.41 mmol) and triethylamine (70 mg, 0.69 mmol). The reaction was heated under reflux for 1 h, at which point the reaction was cooled to room temperature, and portioned between saturated aqueous NaHCO<sub>3</sub> (20 mL), ethyl acetate (20 mL) and methanol (1 mL). The phases were separated, and the aqueous phase was extracted with ethyl acetate (3 x 20 mL). The combined organic fractions were washed with water (40 mL), brine (40 mL), dried (Na<sub>2</sub>SO<sub>4</sub>), filtered, and concentrated *in vacuo* to give 133 mg (93%) of **S15** as an oil (>95% purity, by <sup>1</sup>H NMR). <sup>1</sup>H NMR (600 MHz) δ 8.12 (brs, 1 H), 7.49 - 7.47 (comp, 2 H), 7.40 - 7.38 (comp, 2 H), 7.32 (tt, *J* = 7.4, 1.3 Hz, 1 H), 7.06 (t, *J* = 8.0 Hz, 1 H), 6.98 (dd, *J* = 8.0, 0.6 Hz, 1 H), 6.90 (d, *J* = 2.3 Hz, 1 H), 5.57 (d, *J* = 8.0 Hz, 1 H), 5.14 (s, 2 H), 3.94 (p, *J* = 6.2 Hz, 1 H), 3.62 (ddd, *J* = 12.9, 9.7, 5.9 Hz, 1 H), 3.45 (ddd, *J* = 12.9, 9.7, 5.6 Hz, 1 H), 3.09 - 3.02 (comp, 2 H), 2.95 (ddd, *J* = 13.7, 9.5, 5.8 Hz, 1 H), 2.78 - 2.69 (comp, 2 H), 2.62 (s, 3 H), 2.41 (dt, *J* = 12.9, 4.2 Hz, 1 H), 1.57 - 1.52 (m, 1 H), 1.41 (d, *J* = 6.1 Hz, 3 H), 1.29 (dq, *J* = 14.3, 3.6 Hz, 1 H); <sup>13</sup>C NMR (150 MHz) δ 168.7, 153.8, 138.2, 137.2, 128.6, 128.4, 128.0, 122.7, 121.6, 117.2, 113.3, 104.9, 100.3, 77.5, 77.4, 70.2, 66.2, 55.2, 49.7, 43.2, 25.1, 25.0, 19.2; HRMS (ESI) *m/z* calcd for C<sub>25</sub>H<sub>29</sub>N<sub>3</sub>O<sub>3</sub> (M+H)<sup>+</sup>, 420.2282; found, 420.2289

**(3*R*,4*S*)-1-(2-(4-(Benzyloxy)-1*H*-indol-3-yl)ethyl)-3-((*R*)-1-hydroxyethyl)-4-(methylamino)piperidin-2-one (19c)**. Zinc (powder, 584 mg, 9.00 mmol) was added in three portions over 1.5 h to a solution of **S15** (130 mg, 0.30 mmol) in acetic acid (aq 80%, 18 mL) at 60 °C. The suspension was stirred for 1 h at 60 °C. The suspension was cooled to room temperature, followed by the removal of excess zinc by filtration. Ethyl acetate (100 mL) was added to the filtrate, upon which zinc acetate immediately precipitated out of solution as a fluffy white solid. The zinc acetate was filtered and washed with ethyl acetate. The filtrate was concentrated *in vacuo* to give crude **19c**. The crude material was taken up in aqueous HCl (1 M, 30 mL), and washed with ether (2 x 30 mL). The aqueous fraction was basified to pH ~14 with aqueous NaOH (40% w/v). The basic solution was extracted with CH<sub>2</sub>Cl<sub>2</sub> (4 x 50 mL). The combined organic fractions were washed with saturated aqueous NaHCO<sub>3</sub> (100 mL), water (100 mL), and brine (1 x 100 mL). The organic fractions were dried (Na<sub>2</sub>SO<sub>4</sub>), filtered, and concentrated *in vacuo* to give 72 mg (57%) of **19c** as an oil (>95% purity, by <sup>1</sup>H NMR). <sup>1</sup>H NMR (500 MHz, CD<sub>3</sub>OD) δ 7.47 (d, *J* = 7.0 Hz, 2 H) 7.39 – 7.33 (comp, 3 H), 7.03 (t, *J* = 8.0 Hz, 1 H), 6.98 (dd, *J* = 8.0, 0.5 Hz, 1 H), 6.90 (s, 1 H), 6.55 (dd, *J* = 8.0, 0.5 Hz, 1 H), 5.13 (s, 2 H), 4.39 (p, *J* = 6.0 Hz, 1 H), 3.48 – 3.44 (comp, 2 H), 3.03 – 2.98 (comp, 3 H), 2.80 – 2.78 (m, 1 H), 2.63 – 2.58 (m, 1 H), 2.27 – 2.23 (comp, 4 H), 1.73 (dq, *J* = 13.5, 6.0 Hz, 1 H), 1.46 – 1.40 (m, 1 H), 1.20 (d, *J* = 6.0 Hz, 3 H); <sup>13</sup>C NMR (125 MHz, CD<sub>3</sub>OD) δ 169.5, 153.6,

138.3, 137.3, 128.5, 128.3, 128.0, 122.2, 122.0, 117.1, 112.2, 105.1, 99.9, 70.1, 66.4, 54.4, 50.0, 43.6, 33.3, 24.4, 23.3, 20.9; HRMS (ESI)  $m/z$  calcd for  $C_{25}H_{31}N_3O_3$  (M+H)<sup>+</sup>, 422.2438; found, 422.2442.

**(3R,4S)-1-(2-(4-(Benzyloxy)-1H-indol-3-yl)ethyl)-4-((3,5-dichlorobenzyl)(methyl)amino)-3-((R)-1-hydroxyethyl)piperidin-2-one (14m).** Prepared according to the representative procedure for compound **14a**. The crude material was purified via flash column chromatography eluting with  $CH_2Cl_2$  : acetone : methanol (9 : 1 : 0 → 5 : 4 : 1 along a gradient) to give 26 mg (19%) of **14m** as a white solid. <sup>1</sup>H NMR (400 MHz) δ 9.14 (brs, 1 H), 7.38 (dd,  $J$  = 8.4, 1.6 Hz, 2 H), 7.30 - 7.28 (comp, 2 H), 7.23 (d,  $J$  = 7.2 Hz, 1 H), 7.13 (s, 1 H), 7.01 (s, 2 H), 6.94 - 6.87 (comp, 2 H), 6.77 (d,  $J$  = 2.4 Hz, 1 H), 6.44 (dd,  $J$  = 7.2, 0.8 Hz, 1 H), 5.01 (s, 2 H), 4.09 (dq,  $J$  = 9.2, 6.8 Hz, 1 H), 3.55 - 3.48 (m, 1 H), 3.36 (d,  $J$  = 12.4 Hz, 1 H), 3.28 - 3.1 (comp, 2 H), 2.90 - 2.84 (comp, 3 H), 2.59 - 2.54 (m, 1 H), 1.97 (s, 3 H), 1.55 - 1.50 (comp, 2 H), 1.22 (d,  $J$  = 6.0 Hz, 3 H); <sup>13</sup>C NMR (125 MHz) δ 169.6, 153.8, 141.4, 138.2, 137.3, 135.2, 128.6, 128.5, 128.1, 127.8, 126.6, 122.8, 121.6, 117.2, 113.1, 105.0, 100.3, 70.2, 66.4, 60.4, 57.7, 50.1, 48.7, 44.6, 24.7, 22.5, 21.9; HRMS (ESI)  $m/z$  calcd for  $C_{32}H_{35}Cl_2N_3O_3$  (M+Na)<sup>+</sup>, 602.1948 and 604.1945; found, 602.1927 and 604.1954.

**(3R,4S)-4-((3,5-Dichlorobenzyl)(methyl)amino)-1-(2-(5-hydroxy-1H-indol-3-yl)ethyl)-3-((R)-1-hydroxyethyl)piperidin-2-one (14n).** A solution of **S13** (150 mg, 0.36 mmol) in ethanol (2 mL) was added over 5 min to a degassed of ethanol (12 mL) and Pd/C (10% w/w, 150 mg) at room temperature. A balloon of hydrogen gas was bubbled through the suspension, followed immediately by addition of TFA (3 drops), and the reaction was stirred for 5 h at 60 °C. The suspension was then cooled to room temperature and filtered through a pad of Celite, washing with copious amounts of methanol. The solvent was removed *in vacuo*, followed by azeotropic removal of water with toluene. The crude mixture was dissolved in acetonitrile (10 mL), and 3,5-dichlorobenzaldehyde (190 mg, 1.1 mmol) was added in one portion. The reaction was held under reflux for 2 h, after which the solution was cooled to room temperature. NaBH<sub>3</sub>CN (68 mg, 1.1 mmol) and acetic acid (glacial, 130 μL, 2.2 mmol) were added, and the reaction was stirred for 14 h at room temperature. Saturated aqueous NaHCO<sub>3</sub> (30 mL) was added to the mixture, followed by extraction with  $CH_2Cl_2$  (3 x 30 mL). The combined organic fractions were washed with water (30 mL), dried (Na<sub>2</sub>SO<sub>4</sub>), filtered, and concentrated *in vacuo*. The crude material was purified via flash column chromatography eluting with hexanes : ethyl acetate (1 : 1 → 0 : 1 along a gradient) to give 48 mg (28%, two-steps) of **14n** as an amorphous white solid. <sup>1</sup>H NMR (600 MHz, CD<sub>3</sub>OD) δ 7.32 (t,  $J$  = 1.9 Hz, 1 H), 7.20 (d,  $J$  = 1.9 Hz, 1 H), 7.15 (dd,  $J$  = 8.6, 0.4 Hz, 1 H), 7.00 (s, 1 H), 6.94 (d,  $J$  = 2.0 Hz, 1 H), 6.67 (dd,  $J$  = 8.6, 2.3 Hz, 1 H), 4.20 (dq,  $J$  = 8.6, 6.1 Hz, 1 H), 3.67 (dt,  $J$  = 13.2, 7.6 Hz, 1 H), 3.52 (ddd,  $J$  = 13.3, 7.6, 5.8 Hz, 1 H), 3.46 (d,  $J$  = 13.4 Hz, 1 H), 3.36 (d,  $J$  = 13.4 Hz, 1 H), 3.28 - 3.25 (m, 1 H), 3.09 - 3.01 (comp, 2 H), 2.96 (p,  $J$  = 7.1 Hz, 1 H), 2.88 - 2.84 (m, 1 H), 2.57 (dd,  $J$  = 8.0, 5.2 Hz, 1 H), 2.03 (s, 3 H), 1.94 - 1.91 (m, 1 H), 1.86 - 1.80 (m, 1 H), 1.21 (d,  $J$  = 6.1 Hz, 3 H); <sup>13</sup>C NMR (150 MHz, CD<sub>3</sub>OD) δ 171.9,



151.3, 143.7, 136.2, 133.0, 129.6, 128.5, 128.4, 124.5, 112.8, 112.5, 112.1, 103.5, 67.7, 61.2, 58.4, 51.1, 49.8, 46.6, 38.5, 24.0, 22.8, 22.5; HRMS (ESI)  $m/z$  calcd for  $C_{25}H_{29}Cl_2N_3O_3$  (M+H)<sup>+</sup>, 512.1478 and 514.1455; found, 512.1483 and 514.1459.

**1-(2-(1H-Indol-3-yl)ethyl)-4-((3-chloro-5-methoxybenzyl)(methylamino)piperidin-2-one (25b).** The title compound was prepared following the general procedure of **25a**. The crude material was purified via flash column chromatography, eluting with EtOAc:Et<sub>3</sub>N (99:1) to furnish 19 mg (64%) of **25b** as a pale yellow amorphous solid. <sup>1</sup>H NMR (400 MHz)  $\delta$  8.16 (s, 1 H), 7.65 (d,  $J$  = 7.8 Hz, 1 H), 7.36 (dt,  $J$  = 8.1, 0.9 Hz, 1 H), 7.19 (ddd,  $J$  = 8.1, 7.0, 1.2 Hz, 1 H), 7.11 (ddd,  $J$  = 7.8, 7.0, 1.1 Hz, 1 H), 7.03 (d,  $J$  = 2.4 Hz, 1 H), 6.90 (app s, 1 H), 6.79 (t,  $J$  = 2.1 Hz, 1 H), 6.75 (app s, 1 H), 3.79 (s, 3 H), 3.73 – 3.59 (comp, 2 H), 3.47 (s, 2 H), 3.22 – 2.99 (comp, 4 H), 2.79 (tdd,  $J$  = 11.0, 5.2, 3.1 Hz, 1 H), 2.62 (ddd,  $J$  = 17.0, 5.2, 2.2 Hz, 1 H), 2.43 (dd,  $J$  = 17.0, 10.8 Hz, 1 H), 2.17 (s, 3 H), 1.90 (dt,  $J$  = 9.8, 3.6 Hz, 1 H), 1.60 (dtd,  $J$  = 12.8, 11.1, 5.7 Hz, 1 H); <sup>13</sup>C NMR (100 MHz)  $\delta$  169.1, 160.3, 142.6, 136.2, 134.7, 127.5, 122.03, 121.94, 120.8, 119.3, 118.8, 113.2, 112.73, 112.69, 111.2, 57.6, 56.7, 55.5, 48.1, 46.7, 37.4, 34.9, 26.3, 23.0; IR (NaCl, film) 3262, 3056, 2933, 2853, 2361, 1623, 1576, 1498, 1459, 1431, 1344, 1312, 1271, 1233, 1150, 1097, 1053, 980, 845, 743, 679, 621 cm<sup>-1</sup>; HRMS (ESI)  $m/z$  calc'd for  $C_{24}H_{28}ClN_3O_2$  (M+Na)<sup>+</sup> 448.1762; found, 448.1758.

**1-(2-(1H-Indol-3-yl)ethyl)-4-((3-chlorobenzyl)(methylamino)piperidin-2-one (25c).** The title compound was prepared following the general procedure of **25c**. The crude material was purified via flash column chromatography, eluting with hexanes:EtOAc:Et<sub>3</sub>N (50:50:1) to furnish 29 mg (81%) **25c** as a pale yellow amorphous solid. <sup>1</sup>H NMR (400 MHz)  $\delta$  8.15 (s, 0.89 H), 7.65 (d,  $J$  = 8 Hz, 1.24 H), 7.27 (m, 4.76 H), 7.21 (t,  $J$  = 7 Hz, 1.59 H), 7.13 (t,  $J$  = 7 Hz, 1.37 H), 7.05 (d,  $J$  = 2 Hz, 1.31 H), 3.74 (comp, 3.96 H), 3.12 (comp, 5.07 H), 2.69 (d,  $J$  = 18 Hz, 0.99 H), 2.53 (m, 0.83 H), 2.25 (s, 2.93 H), 2.10 (m, 1.21 H), 1.69 (m, 1.49 H); <sup>13</sup>C NMR (100 MHz)  $\delta$  135.2, 133.3, 128.6, 127.6, 126.4, 123.8, 121.0, 120.9, 118.3, 117.7, 112.2, 110.2, 56.4, 55.8, 47.1, 45.6, 36.2, 33.7, 25.3, 22.0; IR (NaCl, film) 3251, 3055, 2925, 2853, 1742, 1626, 1575, 1497, 1456, 1433, 1344, 1303, 1260, 1231, 1161, 1097, 1075, 1030, 784, 742, 684 cm<sup>-1</sup>; HRMS (ESI)  $m/z$  calcd for  $C_{23}H_{26}ClN_3O$  (M+Na)<sup>+</sup> 418.1657; found 418.1649.

**1-(2-(1H-Indol-3-yl)ethyl)-4-((3,5-dimethoxybenzyl)(methylamino)piperidin-2-one (25d).** The title compound was prepared following the general procedure of **25a**. The crude material was purified via flash column chromatography, eluting with hexanes:EtOAc:Et<sub>3</sub>N (50:50:1 → 0:99:1) to furnish 31 mg (67%) of **25d** as an amorphous white solid. <sup>1</sup>H NMR (400 MHz)  $\delta$  8.31 (s, 1 H), 7.64 (d,  $J$  = 7.9 Hz, 1 H), 7.35 (dt,  $J$  = 8.1, 1.0 Hz, 1 H), 7.18 (ddd,  $J$  = 8.2, 7.0, 1.2 Hz, 1 H), 7.11 (ddd,  $J$  = 8.0, 7.0, 1.1 Hz, 1 H), 6.99 (d,  $J$  = 2.4 Hz, 1 H), 6.49 (d,  $J$  = 2.3 Hz, 2 H), 6.37 (t,  $J$  = 2.3 Hz, 1 H), 3.79 (s, 6 H), 3.73 – 3.57 (comp, 2 H), 3.49 (s, 2 H), 3.16 (ddd,  $J$  = 12.1, 5.5, 3.1 Hz, 1 H), 3.11 – 2.95 (comp, 3 H), 2.81 (tdd,  $J$  = 10.9, 5.0, 3.0 Hz, 1 H), 2.62 (ddd,  $J$  = 17.0, 5.2, 2.2 Hz, 1 H), 2.45 (dd,  $J$  = 17.0, 10.8 Hz, 1 H), 2.20 (s, 3

H), 1.94 – 1.86 (m, 1 H), 1.61 (dtd,  $J = 12.8, 11.2, 5.6$  Hz, 1 H);  $^{13}\text{C}$  NMR (100 MHz)  $\delta$  170.1, 161.6, 137.0, 128.1, 122.64, 122.58, 119.9, 119.3, 113.7, 111.8, 107.0, 99.5, 58.5, 56.7, 55.6, 48.3, 46.9, 37.6, 35.1, 26.2, 23.1; IR (NaCl, film) 3261, 3057, 2936, 2840, 2792, 2243, 1613, 1498, 1457, 1430, 1344, 1299, 1234, 1204, 1154, 1101, 1065, 983, 910, 836, 739  $\text{cm}^{-1}$ ; HRMS (ESI)  $m/z$  calcd for  $\text{C}_{25}\text{H}_{31}\text{N}_3\text{O}_3$  (M+Na) $^{+}$  444.2258; found 444.2252.

**1-(2-(1H-Indol-3-yl)ethyl)-4-((3-methoxybenzyl)(methyl)amino)piperidin-2-one (25e).** The title compound was prepared following the general procedure of **25a**. The crude material was purified via flash column chromatography, eluting with EtOAc:Et<sub>3</sub>N (99:1) to furnish 26 mg (60%) of **25e** as an amorphous white solid.  $^1\text{H}$  NMR (400 MHz)  $\delta$  8.28 (s, 1 H), 7.64 (d,  $J = 7.6$  Hz, 1 H), 7.35 (dt,  $J = 8.1, 0.9$  Hz, 1 H), 7.23 (t,  $J = 8.0$  Hz, 1 H), 7.18 (ddd,  $J = 8.1, 7.0, 1.3$  Hz, 1 H), 7.11 (ddd,  $J = 8.0, 7.0, 1.1$  Hz, 1 H), 7.00 (d,  $J = 2.4$  Hz, 1 H), 6.92 – 6.84 (comp, 2 H), 6.81 (ddd,  $J = 8.2, 2.6, 1.1$  Hz, 1 H), 3.81 (s, 3 H), 3.72 – 3.58 (comp, 2 H), 3.53 (s, 2 H), 3.16 (ddd,  $J = 12.1, 5.6, 3.1$  Hz, 1 H), 3.13 – 2.95 (comp, 3 H), 2.81 (tdd,  $J = 11.0, 5.1, 3.1$  Hz, 1 H), 2.64 (ddd,  $J = 16.9, 5.2, 2.2$  Hz, 1 H), 2.46 (dd,  $J = 16.9, 10.8$  Hz, 1 H), 2.19 (s, 3 H), 1.92 (d,  $J = 12.7$  Hz, 1 H), 1.62 (dtd,  $J = 12.8, 11.2, 5.6$  Hz, 1 H);  $^{13}\text{C}$  NMR (100 MHz)  $\delta$  169.2, 159.7, 136.3, 129.3, 127.5, 122.02, 121.97, 121.0, 119.3, 118.7, 114.2, 113.1, 112.5, 111.2, 58.0, 56.5, 55.2, 48.1, 46.7, 37.3, 34.9, 26.2, 23.0; IR (NaCl, film) 3261, 3055, 2935, 2852, 2791, 2360, 2242, 1624, 1491, 1456, 1344, 1304, 1268, 1152, 1011, 1043, 978, 910, 784, 743, 695  $\text{cm}^{-1}$ ; HRMS (ESI)  $m/z$  calcd for  $\text{C}_{24}\text{H}_{29}\text{N}_3\text{O}_2$  (M+H) $^{+}$  392.2333; found 392.2329.

**1-(2-(1H-Indol-3-yl)ethyl)-4-((benzo[d][1,3]dioxol-5-ylmethyl)(methyl)amino)piperidin-2-one (25f).** The title compound was prepared following the general procedure of **25a**. The crude material was purified by flash column chromatography, eluting with hexanes:EtOAc:Et<sub>3</sub>N (33:66:1) to furnish 14 mg (58%) of **25f** as an amorphous white solid.  $^1\text{H}$  NMR (400 MHz)  $\delta$  8.16 (s, 1 H), 7.65 (d,  $J = 7.8$  Hz, 1 H), 7.36 (d,  $J = 8.2$  Hz, 1 H), 7.19 (ddd,  $J = 8.2, 7.0, 1.3$  Hz, 1 H), 7.11 (ddd,  $J = 7.8, 7.0, 1.1$  Hz, 1 H), 7.03 (d,  $J = 2.3$  Hz, 1 H), 6.82 (d,  $J = 1.5$  Hz, 1 H), 6.77 – 6.69 (comp, 2 H), 5.94 (s, 2 H), 3.74 – 3.58 (comp, 2 H), 3.45 (s, 2 H), 3.21 – 3.09 (comp, 2 H), 3.09 – 2.99 (comp, 2 H), 2.80 (dtd,  $J = 11.0, 5.8, 5.2, 3.5$  Hz, 1 H), 2.62 (ddd,  $J = 16.9, 5.2, 2.2$  Hz, 1 H), 2.44 (dd,  $J = 17.0, 10.8$  Hz, 1 H), 2.16 (s, 3 H), 1.91 (d,  $J = 12.7$  Hz, 1 H), 1.61 (dtd,  $J = 12.8, 11.1, 5.7$  Hz, 1 H);  $^{13}\text{C}$  NMR (100 MHz)  $\delta$  169.4, 148.0, 146.9, 136.5, 127.8, 122.3, 122.2, 122.0, 119.6, 119.0, 113.5, 111.5, 109.3, 108.2, 101.2, 58.0, 56.7, 48.4, 47.0, 37.4, 35.1, 26.6, 23.3; IR (film, NaCl) 3260, 2927, 1625, 1489, 1442, 1343, 1302, 1240, 1096, 1038, 929, 807, 741  $\text{cm}^{-1}$ ; HRMS (ESI)  $m/z$  calc'd for  $\text{C}_{24}\text{H}_{27}\text{N}_3\text{O}_3$  (M+Na) $^{+}$  428.1945; found 428.1939.

**1-(2-(1H-Indol-3-yl)ethyl)-4-(methyl(3-(methylthio)benzyl)amino)piperidin-2-one (25g).** The title compound was prepared following the general procedure of **25a**. The crude material was purified via flash column chromatography, eluting with EtOAc:Et<sub>3</sub>N (99:1) to furnish 32 mg (71%) of **25g** as an amorphous, off-white solid.  $^1\text{H}$  NMR (400 MHz)  $\delta$  8.28 (s, 1 H), 7.64 (d,  $J = 7.8$  Hz, 1 H), 7.35 (dt,  $J = 8.1,$

1.0 Hz, 1 H), 7.26 – 7.08 (comp, 5 H), 7.06 (dt,  $J = 7.5, 1.4$  Hz, 1 H), 6.99 (d,  $J = 2.4$  Hz, 1 H), 3.66 (t,  $J = 7.5$  Hz, 2 H), 3.51 (s, 2 H), 3.16 (ddd,  $J = 12.1, 5.5, 3.1$  Hz, 1 H), 3.12 – 2.96 (comp, 3 H), 2.80 (tdd,  $J = 11.0, 5.1, 3.1$  Hz, 1 H), 2.63 (ddd,  $J = 16.9, 5.2, 2.2$  Hz, 1 H), 2.48 (comp, 4 H), 2.18 (s, 3 H), 1.90 (dt,  $J = 12.8, 3.4$  Hz, 1 H), 1.61 (dtd,  $J = 12.8, 11.2, 5.6$  Hz, 1 H);  $^{13}\text{C}$  NMR (100 MHz)  $\delta$  169.2, 140.0, 138.4, 136.3, 128.8, 127.4, 126.6, 125.4, 125.1, 121.96, 119.26, 118.7, 113.1, 111.2, 57.8, 56.5, 48.1, 46.7, 37.3, 34.9, 26.3, 23.0, 15.8; IR (NaCl, film) 3261, 3054, 2922, 2854, 1622, 1498, 1456, 1344, 1303, 1232, 1158, 1100, 1030, 780, 743, 686  $\text{cm}^{-1}$ ; HRMS (ESI)  $m/z$  calcd for  $\text{C}_{24}\text{H}_{29}\text{N}_3\text{OS}$  ( $\text{M}+\text{Na}$ ) $^+$  430.1924; found 430.1920.

**1-(2-(1H-Indol-3-yl)ethyl)-4-(benzyl(methyl)amino)piperidin-2-one (25h).** The title compound was prepared following the general procedure of **25a**. The crude material was purified via flash column chromatography, eluting with EtOAc:Et<sub>3</sub>N (99:1) to furnish 23 mg (70%) of **25h** as an amorphous white solid.  $^1\text{H}$  NMR (400 MHz)  $\delta$  8.03 (s, 1 H), 7.65 (d,  $J = 7.8$  Hz, 1 H), 7.36 (d,  $J = 8.2$  Hz, 1 H), 7.34 – 7.26 (comp, 5 H), 7.19 (ddd,  $J = 8.2, 7.0, 1.2$  Hz, 1 H), 7.12 (ddd,  $J = 8.0, 7.0, 1.1$  Hz, 1 H), 7.03 (d,  $J = 2.3$  Hz, 1 H), 3.66 (hept,  $J = 6.8, 6.1$  Hz, 2 H), 3.56 (s, 2 H), 3.21 – 2.99 (comp, 4 H), 2.87 – 2.77 (m, 1 H), 2.69 – 2.61 (m, 1 H), 2.47 (dd,  $J = 17.0, 10.8$  Hz, 1 H), 2.19 (s, 3 H), 1.98 – 1.89 (m, 1 H), 1.63 (qd,  $J = 11.5, 5.6$  Hz, 1 H);  $^{13}\text{C}$  NMR (100 MHz)  $\delta$  136.2, 128.9, 128.4, 127.5, 122.05, 121.91, 119.4, 118.8, 113.2, 111.2, 57.9, 56.6, 48.1, 46.7, 26.3, 23.0; IR (NaCl, film) 2923, 2851, 2793, 2242, 1625, 1496, 1456, 1343, 1302, 1260, 1233, 1159, 1101, 1074, 1025, 909, 813, 741, 700  $\text{cm}^{-1}$ ; HRMS (ESI)  $m/z$  calcd for  $\text{C}_{23}\text{H}_{27}\text{N}_3\text{O}$  ( $\text{M}+\text{Na}$ ) $^+$  384.2046; found 384.2039.

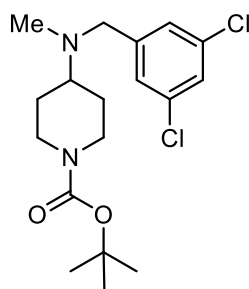

**S16**

**tert-Butyl 4-((3,5-dichlorobenzyl)(methyl)amino)piperidine-1-carboxylate (S16).** A solution of **26** (44 mg, 0.2 mmol), 3,5-dichlorobenzaldehyde (50 mg, 0.3 mmol), acetic acid (10 mg, 0.2 mmol), and sodium triacetoxyborohydride (90 mg, 0.4 mmol) in 1,2-dichloroethane (2 mL) was stirred at room temperature for 18 h, whereupon the solution was diluted with 1 M NaOH (15 mL) and extracted with Et<sub>2</sub>O (3 x 15 mL). The combined organic extracts were dried ( $\text{Na}_2\text{SO}_4$ ) and concentrated via rotary evaporation. The crude material was purified by flash chromatography eluting with hexane:EtOAc:Et<sub>3</sub>N (95:5:1) to give 48 mg (64%) of **S16** as an opaque white oil.  $^1\text{H}$  NMR (400 MHz)  $\delta$  7.23 – 7.19 (comp, 3 H), 4.16 (s, 2 H),

3.50 (s, 2 H), 2.75 – 2.61 (comp, 2 H), 2.55 (tt,  $J = 11.5, 3.6$  Hz, 1 H), 2.17 (s, 3 H), 1.83 – 1.70 (comp, 2 H), 1.45 (comp, 11 H).  $^{13}\text{C}$  NMR (101 MHz)  $\delta$  154.7, 143.9, 134.7, 126.9, 126.7, 79.4, 61.1, 57.0, 43.1, 37.7, 28.4, 27.9; IR (NaCl, film) 2975, 2940, 2854, 2788, 1694, 1590, 1569, 1451, 1425, 1365, 1330, 1275, 1244, 1159, 1111, 1046, 1004  $\text{cm}^{-1}$ . HRMS (ESI)  $m/z$  calcd for  $\text{C}_{18}\text{H}_{26}\text{Cl}_2\text{N}_2\text{O}_2$  (M+H) $^+$  373.1444; found 373.1454.

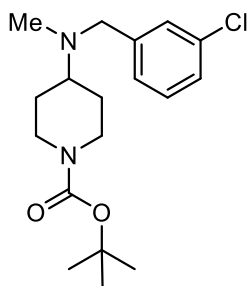

**S17**

**tert-Butyl 4-((3-chlorobenzyl)(methyl)amino)piperidine-1-carboxylate (S17).** The title compound was prepared following the general procedure of **S16**. The crude material was dissolved in hexanes and a solution of HCl in 1,4-dioxane was added until the HCl salt of **S17** precipitated out of solution. The suspension was decanted and washed with additional hexanes (2 x 10 mL), and the resultant residue was resuspended in 1M aq. NaOH (20 mL). The aqueous layer was extracted with Et<sub>2</sub>O (3 x 15 mL), dried (Na<sub>2</sub>SO<sub>4</sub>) and concentrated via rotary evaporation to give 48 mg (71%) of **S17** as a clear oil.  $^1\text{H}$  NMR (300 MHz)  $\delta$  7.33 (s, 1 H), 7.25 – 7.16 (comp, 3 H), 4.17 (s, 2 H), 3.54 (s, 2 H), 2.82 – 2.45 (comp, 3 H), 2.19 (s, 3 H), 1.79 (d,  $J = 12.6$  Hz, 2 H), 1.46 (comp, 11 H);  $^{13}\text{C}$  NMR (101 MHz)  $\delta$  154.7, 142.2, 134.1, 129.4, 128.5, 127.0, 126.6, 79.4, 60.9, 57.4, 43.4 37.6, 28.4, 28.0; IR (NaCl, film) 2937, 2853, 2788, 1694, 1598, 1574, 1475, 1452, 1424, 1365, 1330, 1275, 1243, 1158, 1111, 1075, 1043, 1001  $\text{cm}^{-1}$ . HRMS (ESI)  $m/z$  calcd for  $\text{C}_{18}\text{H}_{27}\text{ClN}_2\text{O}_2$  (M+H) $^+$  339.1834; found 339.1842.

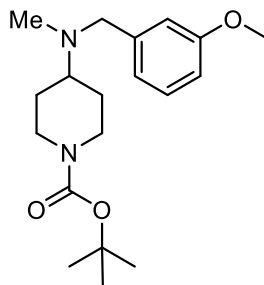

**S18**

**tert-Butyl 4-((3-methoxybenzyl)(methyl)amino)piperidine-1-carboxylate (S18).** The title compound was prepared following the general procedure of **S16**. The crude material was purified by flash chromatography eluting with hexane/EtOAc/Et<sub>3</sub>N (90:10:1) to give 44 mg (69%) of **S18** as a clear oil. <sup>1</sup>H NMR (400 MHz) δ 7.22 (t, *J* = 8.0 Hz, 1 H), 6.89 (dt, *J* = 3.6, 1.5 Hz, 2 H), 6.78 (ddd, *J* = 8.1, 2.6, 1.0 Hz, 1 H), 4.15 (s, 2 H), 3.80 (s, 3 H), 3.55 (s, 2 H), 2.67 (d, *J* = 13.4 Hz, 2 H), 2.62 – 2.51 (m, 1 H), 2.20 (s, 3 H), 1.79 (d, *J* = 12.6 Hz, 2H), 1.46 (s, 11 H); <sup>13</sup>C NMR (101 MHz) δ 159.6, 154.7, 141.6, 129.1, 120.9, 114.0, 112.2, 79.3, 60.6, 57.9, 55.1, 43.4, 37.6, 28.4, 27.9; IR (NaCl, film) 2940, 2853, 2787, 1695, 1601, 1587, 1488, 1454, 1425, 1365, 1330, 1274, 1243, 1158, 1110, 1046, 1003 cm<sup>-1</sup>. HRMS (ESI) *m/z* calcd for C<sub>19</sub>H<sub>30</sub>N<sub>2</sub>O<sub>3</sub> (M+H)<sup>+</sup> 335.2329; found 335.2324.

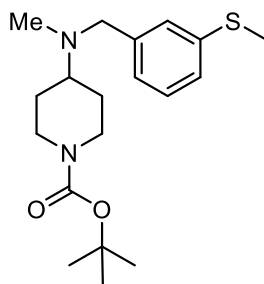

**S19**

**tert-Butyl 4-(methyl(3-(methylthio)benzyl)amino)piperidine-1-carboxylate (S19).** The title compound was prepared following the general procedure of **S16**. The crude material was purified by flash chromatography eluting with hexane/EtOAc/Et<sub>3</sub>N (90:10:1) to give 45 mg (967%) of **S19** as an off-white oil. <sup>1</sup>H NMR (400 MHz) δ 7.22 (s, 2 H), 7.12 (dt, *J* = 7.9, 1.3 Hz, 1 H), 7.10 – 7.05 (m, 1 H), 4.16 (s, 2 H), 3.53 (s, 2 H), 2.68 (t, *J* = 12.5 Hz, 2 H), 2.56 (tt, *J* = 11.3, 3.6 Hz, 1 H), 2.48 (s, 3 H), 2.19 (s, 3 H), 1.79 (d, *J* = 12.8 Hz, 2 H) 1.46 (comp, 11 H). <sup>13</sup>C NMR (101 MHz) δ 154.7, 140.7, 138.2, 128.6, 126.7, 125.4, 124.9, 79.3, 60.8, 57.8, 43.4, 37.6, 28.4, 27.9, 15.8. IR (NaCl, film) 2975, 2929, 2854, 2787, 1695, 1592, 1574, 1474, 1425, 1365, 1330, 1275, 1243, 1159, 1110, 1082, 1043, 1001 cm<sup>-1</sup>. HRMS (ESI) *m/z* calcd for C<sub>19</sub>H<sub>30</sub>N<sub>2</sub>O<sub>2</sub>S (M+Na)<sup>+</sup> 373.1920; found 373.1934.

**N-(3,5-Dichlorobenzyl)-N-methylpiperidin-4-amine (27a).** A solution of **S16** (52 mg, 0.14 mmol) and trifluoroacetic acid (160 mg, 1.4 mmol) in CH<sub>2</sub>Cl<sub>2</sub> (2.8 mL) was stirred at room temperature for 24 h, whereupon the solvent was removed by rotary evaporation. The resulting solid was resuspended in 1 M HCl (20 mL) and washed with Et<sub>2</sub>O (20 mL). 3 M NaOH was added to the aqueous layer until the solution became cloudy, whereupon it was extracted with CH<sub>2</sub>Cl<sub>2</sub> (3 x 20 mL), dried (Na<sub>2</sub>SO<sub>4</sub>) and concentrated via rotary evaporation to give 29 mg (76%) of **27a** as a yellow paste. <sup>1</sup>H NMR (400 MHz) δ 7.22 (t, *J* = 0.6 Hz, 3 H), 3.52 (s, 2 H), 3.18 (d, *J* = 12.2 Hz, 2 H), 2.66 – 2.46 (m, 4 H), 2.19 (s, 3 H), 1.51 (qd, *J* = 12.1, 4.1 Hz, 3 H); <sup>13</sup>C NMR (100 MHz) δ 144.1, 134.7, 126.9, 126.8, 61.1, 56.9, 46.1, 37.7, 29.0; IR (NaCl, film) 2941, 2851, 2791, 1589, 1568, 1449, 1432, 1384, 1353, 1273, 1208, 1045 cm<sup>-1</sup>; HRMS (ESI) *m/z* calcd for C<sub>13</sub>H<sub>18</sub>Cl<sub>2</sub>N<sub>2</sub> (M+H)<sup>+</sup> 273.0920; found 273.0923.

**N-(3-Chlorobenzyl)-N-methylpiperidin-4-amine (27b).** The title compound was prepared following the general procedure of **27a** to give 15 mg (79%) of **27b** as a yellow oil. <sup>1</sup>H NMR (400 MHz) δ 7.34 – 7.31 (m, 1 H), 7.25 – 7.16 (comp, 3 H), 3.54 (s, 2 H), 3.15 (dt, *J* = 12.7, 3.4 Hz, 2 H), 2.64 – 2.46 (comp, 3 H), 2.19 (s, 3 H), 1.82 (dt, *J* = 12.7, 2.7 Hz, 2 H), 1.49 (qd, *J* = 12.3, 4.3 Hz, 2 H). <sup>13</sup>C NMR (101 MHz) δ 142.5, 134.1, 129.4, 128.6, 126.9, 126.6, 61.2, 57.2, 46.3, 37.6, 29.3. IR (NaCl, film) 3291, 3061, 2939, 2850, 2789, 1597, 1574, 1472, 1451, 1429, 1356, 1324, 1260, 1209, 1147, 1075, 1043, 1003 cm<sup>-1</sup>. HRMS (ESI) *m/z* calcd for C<sub>13</sub>H<sub>19</sub>ClN<sub>2</sub> (M+H)<sup>+</sup> 239.1310; found 239.1313.

**N-(3-Methoxybenzyl)-N-methylpiperidin-4-amine (27c).** The title compound was prepared following the general procedure of **27a** to give 15 mg (79%) of **27c** as a yellow oil. <sup>1</sup>H NMR (400 MHz) δ 7.21 (t, *J* = 8.0 Hz, 1 H), 6.92 – 6.87 (comp, 2 H), 6.78 (ddd, *J* = 8.3, 2.6, 1.0 Hz, 1 H), 3.80 (s, 3 H), 3.55 (s, 2 H), 3.19 – 3.09 (d, *J* = 12.3 Hz, 2 H), 2.62 – 2.47 (comp, 3 H), 2.21 (s, 3 H), 1.87 – 1.79 (br, 2 H), 1.51 (td, *J* = 12.1, 4.0 Hz, 2 H). <sup>13</sup>C NMR (101 MHz) δ 159.6, 141.8, 129.1, 121.0, 114.1, 112.2, 61.0, 57.7, 55.1, 46.4, 37.6, 29.3. IR (NaCl, film) 3306, 2939, 2839, 2788, 1691, 1600, 1488, 1454, 1361, 1318, 1269, 1150, 1046 cm<sup>-1</sup>. HRMS (ESI) *m/z* calcd for C<sub>14</sub>H<sub>22</sub>N<sub>2</sub>O (M+H)<sup>+</sup> 235.1805; found 235.1805.

**N-Methyl-N-(3-(methylthio)benzyl)piperidin-4-amine (27d).** The title compound was prepared following the general procedure of **27c** to give 23 mg (87%) of **27d** as a pale yellow oil. <sup>1</sup>H NMR (400 MHz) δ 7.25 – 7.19 (comp, 2 H), 7.12 (ddd, *J* = 7.8, 2.0, 1.2 Hz, 1 H), 7.10 – 7.06 (m, 1 H), 3.54 (s, 2 H), 3.19 – 3.08 (comp, 2 H), 2.62 – 2.45 (comp, 6 H), 2.19 (s, 3 H), 1.85 (d, *J* = 8.8 Hz, 2 H), 1.56 – 1.42 (comp, 2 H); <sup>13</sup>C NMR (101 MHz) δ 140.9, 138.1, 128.6, 126.8, 125.5, 124.9, 61.0, 57.6, 46.4, 37.6, 29.3, 15.8; IR (NaCl, film) 3292, 2938, 2850, 2790, 1591, 1572, 1471, 1422, 1356, 1325, 1273, 1213, 1147, 1084, 1042 cm<sup>-1</sup>. HRMS (ESI) *m/z* calcd for C<sub>14</sub>H<sub>22</sub>N<sub>2</sub>S (M+H)<sup>+</sup> 251.1576; found 251.1584.

**1-(4-((3,5-Dichlorobenzyl)(methyl)amino)piperidin-1-yl)-2-(1H-indol-3-yl)ethan-1-one (28a).** A solution **27a** (33 mg, 0.12 mmol), indole-3-acetic acid (32 mg, 0.18 mmol), EDCI·HCl (35 mg, 0.18 mmol), and iPr<sub>2</sub>NEt (0.8 mL, 0.5 mmol) in THF (1.2 mL) was stirred at rt for 2 h. The reaction was then

diluted with 1 M aq. NaOH (20 mL) and extracted with CH<sub>2</sub>Cl<sub>2</sub> (3 x 15 mL). The combined organic extracts were dried (Na<sub>2</sub>SO<sub>4</sub>) and concentrated via rotary evaporation. The crude material was purified by flash chromatography, eluting with hexanes:EtOAc:Et<sub>3</sub>N (40:60:1) to give **28a** (40 mg, 78%) as an amorphous white solid. <sup>1</sup>H NMR (400 MHz) δ 8.17 (s, 1 H), 7.65 (dq, *J* = 7.9, 0.9 Hz, 1 H), 7.35 (dt, *J* = 8.1, 1.0 Hz, 1 H), 7.22 (t, *J* = 2.0 Hz, 1 H), 7.19 (ddd, *J* = 8.2, 7.0, 1.2 Hz, 1 H), 7.16 - 7.14 (m, 2 H), 7.13 (ddd, *J* = 8.0, 7.1, 1.1 Hz, 1 H), 7.09 (dd, *J* = 2.3, 1.1 Hz, 1 H), 4.74 (d, *J* = 13.7 Hz, 1 H), 4.05 - 3.93 (m, 1 H), 3.86 (dd, *J* = 4.4, 1.0 Hz, 2 H), 3.37 (s, 2 H), 2.93 (td, *J* = 12.9, 2.7 Hz, 1 H), 2.55 (td, *J* = 11.2, 10.6, 3.0 Hz, 2 H), 2.07 (s, 3 H), 1.80 (d, *J* = 13.0 Hz, 1 H), 1.58 (d, *J* = 13.0 Hz, 1 H), 1.40 (qd, *J* = 12.3, 4.4 Hz, 1 H), 1.12 (qd, *J* = 12.3, 4.3 Hz, 1 H) ppm; <sup>13</sup>C NMR (126 MHz) δ 170.1, 144.0, 136.4, 135.0, 127.3, 127.3, 126.9, 122.6, 122.5, 119.9, 119.1, 111.4, 109.8, 61.1, 57.1, 46.1, 41.8, 37.9, 31.9, 28.7, 27.7 ppm; IR (NaCl, film) 3058, 2926, 2857, 2790, 1624, 1568, 1454, 1434, 1353, 1268, 1227, 1149, 1125, 1098, 1047 cm<sup>-1</sup>; HRMS (ESI) *m/z* calcd for C<sub>23</sub>H<sub>25</sub>Cl<sub>2</sub>N<sub>3</sub>O (M+Na)<sup>+</sup> 452.1267; found, 452.1268.

**1-(4-((2-Chlorobenzyl)(methyl)amino)piperidin-1-yl)-2-(5-methoxy-1H-indol-3-yl)ethan-1-one (28b)**. The title compound was prepared following a procedure analogous to that of **28a**. The crude material was purified by flash chromatography eluting with EtOAc/Et<sub>3</sub>N (100:1) to give 40 mg (70%) of **28b** as an amorphous yellow solid. <sup>1</sup>H NMR (400 MHz) δ 8.00 (s, 1 H), 7.29 - 7.27 (m, 1 H), 7.24 (dd, *J* = 8.8, 0.6 Hz, 1 H), 7.22 - 7.19 (m, 2 H), 7.15 - 7.11 (m, 1 H), 7.10 (d, *J* = 2.5 Hz, 1 H), 7.07 (d, *J* = 2.2 Hz, 1 H), 6.89 - 6.82 (m, 1 H), 4.73 (d, *J* = 13.5 Hz, 1 H), 4.02 (d, *J* = 16.7 Hz, 1 H), 3.86 (s, 3 H), 3.83 (dd, *J* = 2.9, 1.0 Hz, 2 H), 3.42 (s, 2 H), 2.93 (s, 1 H), 2.63 - 2.50 (m, 2 H), 2.08 (s, 3 H), 1.82 (d, *J* = 13.1 Hz, 1 H), 1.64 (d, *J* = 12.8 Hz, 1 H), 1.43 (qd, *J* = 12.1, 4.3 Hz, 1 H), 1.22 - 1.10 (m, 1 H). <sup>13</sup>C NMR (101 MHz) δ 169.8, 154.1, 142.1, 134.2, 131.3, 129.5, 128.5, 127.4, 127.0, 126.6, 123.0, 112.5, 111.9, 109.2, 100.5, 60.6, 57.3, 55.9, 45.9, 41.6, 37.6, 31.8, 28.5, 27.4. IR (NaCl, film) 3267, 3056, 2941, 2858, 2244, 2127, 1625, 1486, 1451, 1357, 1332, 1302, 1267, 1216, 1171, 1097, 1055 cm<sup>-1</sup>. HRMS (ESI) *m/z* calcd for C<sub>24</sub>H<sub>28</sub>ClN<sub>3</sub>O<sub>2</sub> (M+Na)<sup>+</sup> 448.1762; found 448.1774.

**3-(1H-Benzo[d]imidazol-2-yl)-1-(4-((3,5-dichlorobenzyl)(methyl)amino)piperidin-1-yl)propan-1-one (28c)**. The title compound was prepared following a procedure analogous to that of **28a**. The crude material was purified by flash chromatography eluting with EtOAc/Et<sub>3</sub>N (100:1) to give 82 mg (87%) of **28c** as an amorphous white solid. <sup>1</sup>H NMR (400 MHz) δ 10.31 (s, 1 H), 7.74 - 7.38 (m, 2 H), 7.24 - 7.17 (comp, 5 H), 4.71 (d, *J* = 13.1 Hz, 1 H), 3.90 (d, *J* = 13.6 Hz, 1 H), 3.48 (s, 2 H), 3.32 - 3.23 (comp, 2 H), 3.06 - 2.94 (m, 1 H), 2.84 (dd, *J* = 7.3, 4.2 Hz, 2 H), 2.70 - 2.57 (comp, 2 H), 2.15 (s, 3 H), 1.91 - 1.81 (comp, 2 H), 1.45 (qd, *J* = 14.2, 12.9, 6.2 Hz, 2 H). <sup>13</sup>C NMR (101 MHz) δ 170.6, 154.6, 143.6, 134.8, 127.1, 126.7, 122.0, 60.7, 57.0, 45.0, 41.6, 37.6, 31.6, 28.4, 27.7, 24.5; IR (NaCl, film) 3200, 3057, 2945, 2857, 2789, 2360, 2344, 1631, 1568, 1538, 1450, 1353, 1271, 1226, 1152, 1098, 1046 cm<sup>-1</sup>. HRMS (ESI) *m/z* calcd for C<sub>23</sub>H<sub>26</sub>Cl<sub>2</sub>N<sub>4</sub>O (M+Na)<sup>+</sup> 467.1376; found 467.1385.

**1-(2-(1H-Indol-3-yl)ethyl)-N-(3,5-dichlorobenzyl)-N-methylpiperidin-4-amine (29a).** To a solution of **28a** (20 mg, 0.05 mmol) in THF (1 mL) was added a 0.5 M solution of alane in toluene (0.15 mmol, 0.30 mL) and stirred for 3 h at rt. The reaction was then diluted with 1 M NaOH (20 mL) and extracted with CH<sub>2</sub>Cl<sub>2</sub> (3 x 15 mL). The combined organic extracts were dried (Na<sub>2</sub>SO<sub>4</sub>) and concentrated via rotary evaporation. The crude material purified by flash chromatography eluting with hexanes/EtOAc/Et<sub>3</sub>N (40:60:1) to give 15 mg (70%) of **29a** as a yellow paste. <sup>1</sup>H NMR (400 MHz) δ 8.13 – 8.05 (s, 1 H), 7.61 (d, *J* = 7.8 Hz, 1 H), 7.34 (dt, *J* = 8.0, 0.9 Hz, 1 H), 7.23 (s, 3 H), 7.21 – 7.16 (m, 1 H), 7.15 – 7.09 (m, 1 H), 7.01 (d, *J* = 2.2 Hz, 1 H), 3.80 – 3.71 (m, 1 H), 3.53 (s, 2 H), 3.21 – 3.11 (comp, 2 H), 3.02 – 2.93 (comp, 2 H), 2.75 – 2.65 (comp, 2 H), 2.46 (tt, *J* = 11.5, 3.8 Hz, 1 H), 2.21 (s, 3 H), 2.05 (td, *J* = 11.8, 2.4 Hz, 2 H), 1.85 (comp, 3 H), 1.70 (qd, *J* = 12.0, 3.8 Hz, 2 H). <sup>13</sup>C NMR (101 MHz) δ 144.2, 136.2, 134.7, 127.4, 126.9, 126.8, 122.0, 121.4, 119.2, 118.8, 114.5, 111.1, 61.3, 59.3, 57.0, 53.4, 37.9, 27.9, 23.2. IR (NaCl, film) 3412, 3179, 3057, 2943, 2853, 2808, 2360, 1620, 1589, 1568, 1455, 1433, 1376, 1353, 1303, 1228, 1145, 1097, 1049, 1014 cm<sup>-1</sup>. HRMS (ESI) *m/z* calcd for C<sub>23</sub>H<sub>27</sub>Cl<sub>2</sub>N<sub>3</sub> (M+H)<sup>+</sup> 416.1655; found 416.1656.

**N-(3-Chlorobenzyl)-1-(2-(5-methoxy-1H-indol-3-yl)ethyl)-N-methylpiperidin-4-amine (29b).** The title compound was prepared following a procedure analogous to that of **29a**. The crude material was purified by flash chromatography eluting with EtOAc/Et<sub>3</sub>N (100:1) to give 13 mg (62%) of **29b** as a yellow paste. <sup>1</sup>H NMR (400 MHz) δ 7.97 (s, 1 H), 7.34 (t, *J* = 1.8 Hz, 1 H), 7.25 – 7.17 (comp, 4 H), 7.05 (d, *J* = 2.4 Hz, 1 H), 6.99 (d, *J* = 2.2 Hz, 1 H), 6.84 (dt, *J* = 8.9, 2.3 Hz, 1 H), 3.85 (s, 3 H), 3.56 (s, 2 H), 3.18 (d, *J* = 11.3 Hz, 2 H), 2.99 – 2.90 (comp, 2 H), 2.74 – 2.65 (comp, 2 H), 2.56 – 2.40 (m, 1 H), 2.21 (s, 3 H), 2.12 – 2.02 (comp, 2 H), 1.85 (d, *J* = 12.5 Hz, 2 H), 1.80 – 1.66 (comp, 2 H). <sup>13</sup>C NMR (101 MHz) δ 153.9, 142.5, 134.1, 131.3, 129.4, 128.6, 127.8, 126.9, 126.7, 122.3, 114.1, 112.1, 111.8, 100.7, 61.0, 59.2, 57.4, 56.0, 53.4, 37.8, 27.8, 23.2. IR (NaCl, film) 3156, 3049, 2939, 2853, 2808, 2249, 1625, 1581, 1484, 1453, 1356, 1301, 1261, 1216, 1172, 1144, 1119, 1068, 1040 cm<sup>-1</sup>. HRMS (ESI) *m/z* calcd for C<sub>24</sub>H<sub>30</sub>ClN<sub>3</sub>O (M+Na)<sup>+</sup> 434.1970; found 434.1977.

**1-(3-(1H-Benzo[d]imidazol-2-yl)propyl)-N-(3,5-dichlorobenzyl)-N-methylpiperidin-4-amine (29c).** To a stirred suspension of NaBH<sub>4</sub> (32 mg, 0.85 mmol) in THF (0.7 mL) was added a solution of I<sub>2</sub> (99 mg, 0.39 mmol) in THF (0.7 mL) while cooling at 0 °C. Once the solution turned clear, **28c** (40 mg, 0.09 mmol) was added, and the solution was warmed to room temperature and stirred overnight, whereupon the reaction was quenched via the slow addition of MeOH (1 mL). The mixture was concentrated via rotary evaporation, resuspended in 3 M HCl (3 mL), and heated under reflux for an additional 6 h. The reaction was then cooled to room temperature, 1 M NaOH (20 mL) was added, and the aqueous solution was extracted with CH<sub>2</sub>Cl<sub>2</sub> (3 x 15 mL). The combined organic layers were dried (Na<sub>2</sub>SO<sub>4</sub>) and concentrated via rotary evaporation, and the crude material was purified via column chromatography, eluting with



EtOAc:MeOH:Et<sub>3</sub>N (100:0:1 → 95:5:1) to give 32 mg (82%) of **29c** as a white solid. <sup>1</sup>H NMR (400 MHz) δ 7.52 (dd, *J* = 6.0, 3.2 Hz, 2 H), 7.26 – 7.24 (comp, 3 H), 7.19 (dd, *J* = 6.0, 3.2 Hz, 2 H), 3.57 (s, 2 H), 3.17 – 3.04 (comp, 4 H), 2.61 – 2.54 (comp, 2 H), 2.50 (ddt, *J* = 11.4, 7.6, 3.8 Hz, 1 H), 2.27 (s, 3 H), 2.07 (td, *J* = 12.0, 2.4 Hz, 2 H), 2.02 – 1.95 (comp, 2 H), 1.91 (d, *J* = 13.0, 2.8 Hz, 2 H), 1.81 – 1.68 (comp, 2 H); <sup>13</sup>C NMR (101 MHz) δ 155.7, 143.9, 134.8, 127.1, 126.8, 121.7, 114.6, 60.7, 59.0, 57.4, 53.3, 37.8, 29.5, 28.2, 23.7; IR (NaCl, film) 3056, 2944, 2785, 2248, 2192, 1622, 1590, 1568, 1541, 1451, 1431, 1379, 1352, 1304, 1272, 1211, 1123, 1098, 1051, 1026 cm<sup>-1</sup>; HRMS (ESI) *m/z* calcd for C<sub>23</sub>H<sub>28</sub>Cl<sub>2</sub>N<sub>4</sub> (M+H)<sup>+</sup> 431.1764; found 431.1785.

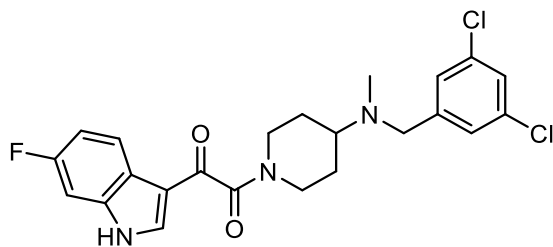

**S20**

**1-(4-((3,5-Dichlorobenzyl)(methylamino)piperidin-1-yl)-2-(6-fluoro-1H-indol-3-yl)ethane-1,2-dione (S20).** To a solution of **28a** (30 mg, 0.09 mmol) and iPr<sub>2</sub>NEt (0.03 mL, 0.2 mmol) in CH<sub>2</sub>Cl<sub>2</sub> (1 mL) was added 2-(5-fluoro-1H-indol-3-yl)-2-oxoacetyl chloride (29 mg, 0.13 mmol), and the reaction was stirred at rt for 48 h. The reaction was then diluted with 1 M aq. NaOH (20 mL) and extracted with CH<sub>2</sub>Cl<sub>2</sub> (3 x 15 mL). The combined organic extracts were dried (Na<sub>2</sub>SO<sub>4</sub>) and concentrated via rotary evaporation. The crude material was purified by flash chromatography, eluting with hexanes:EtOAc:Et<sub>3</sub>N (50:50:1) to give 36 mg (86%) of **S20** as a white paste. <sup>1</sup>H NMR (500 MHz) δ 10.14 (s, 1 H), 8.24 (dd, *J* = 8.5, 5.3 Hz, 1 H), 7.76 (s, 1 H), 7.25 – 7.18 (comp, 3 H), 7.09 – 6.96 (comp, 2 H), 4.69 (ddt, *J* = 13.3, 4.7, 2.5 Hz, 1 H), 3.91 (ddt, *J* = 13.6, 5.0, 2.6 Hz, 1 H), 3.52 (s, 2 H), 3.10 – 2.99 (m, 1 H), 2.84 – 2.75 (m, 1 H), 2.70 (tt, *J* = 11.4, 3.6 Hz, 1 H), 2.18 (s, 3 H), 1.97 – 1.93 (m, 1 H), 1.85 – 1.78 (m, 1 H), 1.59 (pd, *J* = 12.5, 4.3 Hz, 2 H); <sup>13</sup>C NMR (126 MHz) δ 185.9, 166.1, 161.6, 159.7, 143.6, 136.9, 136.8, 135.8, 135.8, 134.8, 127.2, 126.7, 125.5, 123.0, 123.0, 121.6, 114.5, 111.9, 111.7, 98.7, 98.5, 60.8, 57.1, 56.0, 45.8, 45.6, 41.1, 37.7, 34.6, 34.2, 30.3, 29.7, 28.6, 27.9, 23.4, 22.7, 21.2, 14.8, 14.2, 14.1; IR (NaCl, film) 2926, 2855, 1623, 1595, 1568, 1525, 1504, 1446, 1432, 1372, 1268, 1232, 1150, 1091, 1046 cm<sup>-1</sup>; HRMS (ESI) *m/z* calcd C<sub>23</sub>H<sub>22</sub>Cl<sub>2</sub>FN<sub>3</sub>O<sub>2</sub> (M+H)<sup>+</sup> 462.1146; found 462.1156.

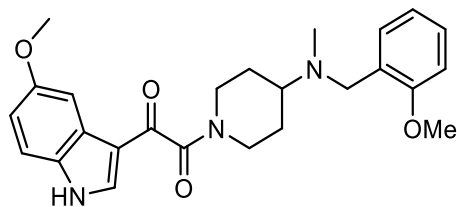

**S21**

**1-(5-Methoxy-1H-indol-3-yl)-2-(4-((2-methoxybenzyl)(methyl)amino)piperidin-1-yl)ethane-1,2-dione (S21).** The title compound was prepared following a procedure analogous to that of **S20**. The crude material was purified by flash chromatography eluting with EtOAc/Et<sub>3</sub>N (100:1) to give 82 mg (75%) of **S21** as a white foam. <sup>1</sup>H NMR (400 MHz) δ 10.12 (s, 1 H), 7.78 (d, *J* = 2.5 Hz, 1 H), 7.65 (s, 1 H), 7.22 (t, *J* = 8.3 Hz, 2 H), 6.91 – 6.85 (comp, 3 H), 6.78 (ddd, *J* = 8.2, 2.5, 1.1 Hz, 1 H), 4.66 (d, *J* = 13.4 Hz, 1 H), 3.87 (comp, 4 H), 3.79 (s, 3 H), 3.55 (s, 2 H), 3.02 (td, *J* = 13.8, 13.0, 2.7 Hz, 1 H), 2.83 – 2.64 (comp, 2 H), 2.20 (s, 3 H), 1.97 (dd, *J* = 10.1, 5.7 Hz, 1 H), 1.81 (d, *J* = 12.7 Hz, 1 H), 1.61 (dtd, *J* = 16.1, 12.3, 4.2 Hz, 2 H). <sup>13</sup>C NMR (101 MHz) δ 186.1, 166.4, 159.7, 156.7, 141.2, 135.5, 131.4, 129.3, 126.1, 121.0, 114.7, 114.3, 114.1, 112.9, 112.3, 103.1, 60.2, 58.0, 55.8, 55.2, 45.88, 41.1, 37.7, 28.6, 27.8. IR (NaCl, film) 3231, 2949, 2362, 2249, 1628, 1519, 1487, 1439, 1364, 1299, 1211, 1179, 1149, 1089, 1042 cm<sup>-1</sup>. HRMS (ESI) *m/z* calcd C<sub>25</sub>H<sub>29</sub>N<sub>3</sub>O<sub>4</sub> (M+H)<sup>+</sup> 436.2231; found 436.2232.

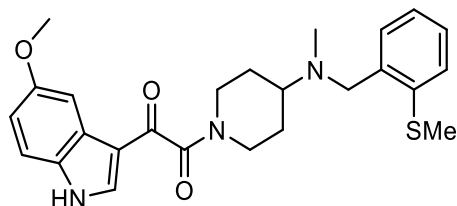

**S22**

**1-(5-Methoxy-1H-indol-3-yl)-2-(4-(methyl(3-(methylthio)benzyl)amino)piperidin-1-yl)ethane-1,2-dione (S22).** The title compound was prepared following a procedure analogous to that of **S20**. The crude material was purified by flash chromatography eluting with EtOAc/Et<sub>3</sub>N (100:1) to give 32 mg (79%) of **S22** as a light tan foam. <sup>1</sup>H NMR (400 MHz) δ 8.99 (s, 1 H), 7.85 (d, *J* = 3.0 Hz, 2 H), 7.14 (d, *J* = 7.5 Hz, 1 H), 7.08 (d, *J* = 7.6 Hz, 1 H), 6.95 (dd, *J* = 8.9, 2.5 Hz, 1 H), 4.71 (d, *J* = 13.4 Hz, 1 H), 3.91 (d, *J* = 1.8 Hz, 4 H), 3.56 (s, 2 H), 3.06 (t, *J* = 11.7 Hz, 1 H), 2.84 – 2.67 (comp, 2 H), 2.49 (d, *J* = 0.6 Hz, 3 H), 2.21 (s, 3 H), 2.01 – 1.94 (m, 1 H), 1.84 (d, *J* = 13.0 Hz, 1 H), 1.68-1.52 (comp, 2 H). <sup>13</sup>C NMR (101 MHz) δ 186.1, 166.3, 156.8, 140.3, 138.4, 131.4, 128.8, 126.6, 126.1, 125.4, 125.0, 114.7, 114.3, 112.8, 103.2, 60.4, 57.8, 55.8, 45.9, 41.1, 37.7, 28.6, 27.8, 15.8. IR (NaCl, film) 3225, 2947, 2248, 1627, 1518, 1474, 1439, 1367, 1298, 1268, 1243, 1211, 1179, 1128, 1088, 1033 cm<sup>-1</sup>. HRMS (ESI) *m/z* calcd for C<sub>25</sub>H<sub>29</sub>N<sub>3</sub>O<sub>3</sub>S (M+H)<sup>+</sup> 452.2002; found 452.2019.

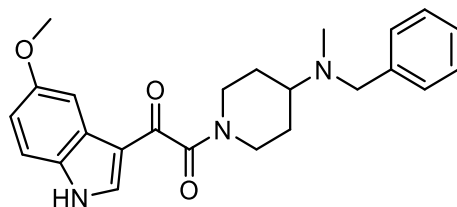

**S23**

**1-(4-(Benzyl(methyl)amino)piperidin-1-yl)-2-(5-methoxy-1H-indol-3-yl)ethane-1,2-dione**

**(S23).** The title compound was prepared following a procedure analogous to that of **S20**. The crude material was purified by flash chromatography eluting with EtOAc/Et<sub>3</sub>N (100:1) to give 80 mg (80%) of **S23** as a white foam. <sup>1</sup>H NMR (400 MHz) δ 9.85 (s, 1 H), 7.80 (d, *J* = 2.5 Hz, 1 H), 7.70 (d, *J* = 1.9 Hz, 1 H), 7.33 – 7.27 (comp, 4 H), 7.26 – 7.21 (comp, 2 H), 6.89 (ddd, *J* = 8.9, 2.5, 0.3 Hz, 1 H), 3.88 (comp, 4 H), 3.57 (s, 2 H), 3.03 (ddd, *J* = 13.8, 12.1, 2.8 Hz, 1 H), 2.83 – 2.65 (comp, 2 H), 2.20 (s, 3 H), 2.03 – 1.93 (m, 1 H), 1.83 (d, *J* = 12.7 Hz, 1 H), 1.71 – 1.53 (comp, 2 H). <sup>13</sup>C NMR (101 MHz) δ 186.08, 166.27, 156.77, 139.46, 135.33, 131.34, 128.64, 128.30, 126.96, 126.11, 114.72, 114.44, 112.73, 103.24, 60.33, 58.04, 55.76, 45.84, 41.06, 37.58, 28.67, 27.83. IR (NaCl, film) 3216, 2948, 1627, 1518, 1487, 1442, 1365, 1299, 1268, 1243, 1211, 1179, 1129, 1089, 1030, 958 cm<sup>-1</sup>. HRMS (ESI) *m/z* calcd C<sub>24</sub>H<sub>27</sub>N<sub>3</sub>O<sub>3</sub> (M+Na)<sup>+</sup> 428.1945; found 428.1960.

**N-(3,5-Dichlorobenzyl)-1-(2-(6-fluoro-1H-indol-3-yl)ethyl)-N-methylpiperidin-4-amine**

**(29d).** To a stirred suspension of NaBH<sub>4</sub> (20 mg, 0.53 mmol) in THF (2 mL) was added I<sub>2</sub> (63 mg, 0.25 mmol) while cooling at 0 °C. Once the solution turned clear, **S20** (46 mg, 0.10 mmol) was added at 0 °C, and the solution was then heated under reflux overnight, whereupon saturated aq. NaHCO<sub>3</sub> (10 mL) was added and the solution was extracted with CH<sub>2</sub>Cl<sub>2</sub> (3 x 15 mL). The combined organic layers were dried (Na<sub>2</sub>SO<sub>4</sub>) to give a white paste which was then dissolved in EtOH (5 mL) and treated with CsF (60 mg, 0.39 mmol) and Na<sub>2</sub>CO<sub>3</sub> (60 mg, 0.57 mmol), and the resulting solution was heated under reflux for 24 h, whereupon it was cooled to room temperature and filtered over celite, rinsing with EtOAc. The solution was concentrated via rotary evaporation and the resultant crude material was purified via column chromatography, eluting with hexanes:EtOAc:Et<sub>3</sub>N (20:80:1) to give 19 mg (44%) of the title compound as a clear paste. <sup>1</sup>H NMR (500 MHz) δ 8.02 (s, 1 H), 7.50 (dd, *J* = 8.7, 5.3 Hz, 1 H), 7.23 (s, 3 H), 7.06 – 6.98 (comp, 2 H), 6.88 (td, *J* = 9.2, 2.2 Hz, 1 H), 3.53 (s, 2 H), 3.15 (d, *J* = 10.8 Hz, 2 H), 2.98 – 2.92 (comp, 2 H), 2.69 (dd, *J* = 9.8, 6.6 Hz, 2 H), 2.47 (tt, *J* = 11.4, 3.7 Hz, 1 H), 2.21 (s, 3 H), 2.07 (t, *J* = 11.6 Hz, 2 H), 1.87 – 1.80 (comp, 2 H), 1.71 (qd, *J* = 12.2, 3.6 Hz, 2 H); <sup>13</sup>C NMR (126 MHz) δ 161.0, 159.1, 144.2, 136.2, 136.1, 134.7, 127.0, 126.8, 124.1, 121.7, 121.6, 119.6, 119.5, 114.6, 108.1, 107.9, 97.5, 97.3, 61.2, 59.2, 57.0, 53.4, 37.9, 27.9, 23.1; IR (NaCl, film) 2918, 2849, 1567, 1457, 1432, 1245, 1140 cm<sup>-1</sup>. HRMS (ESI) *m/z* calcd C<sub>23</sub>H<sub>26</sub>Cl<sub>2</sub>FN<sub>3</sub> (M+H)<sup>+</sup> 434.1561; found 434.1571.

**4-((3,5-Dichlorobenzyl)(methyl)amino)-N-phenylpiperidine-1-carboxamide (29e).** A solution of **27a** (28 mg, 0.10 mmol), phenyl isocyanate (24 mg, 0.20 mmol) and (*i*-Pr)<sub>2</sub>NEt (13 mg, 0.10 mmol) in CH<sub>2</sub>Cl<sub>2</sub> was stirred overnight at room temperature, and the solvent was removed via rotary evaporation. The crude material was resuspended in 1 M aq. HCl (10 mL) and washed with Et<sub>2</sub>O (2 x 20 mL). The aqueous layer was then made basic via the addition of 3 M aq. NaOH (10 mL) and extracted with CH<sub>2</sub>Cl<sub>2</sub> (5 x 15 mL). The combined organic layers were dried (Na<sub>2</sub>SO<sub>4</sub>) and concentrated via rotary evaporation to give 22 mg (56%) of the title compound as a white solid. <sup>1</sup>H NMR (400 MHz, CD<sub>3</sub>OD) δ 7.37 – 7.29 (comp, 5 H), 7.29 – 7.20 (comp, 2 H), 7.04 – 6.97 (m, 1 H), 4.24 (d, *J* = 13.2 Hz, 2 H), 3.61 (s, 2 H), 2.87 (td, *J* = 13.7, 2.5 Hz, 2 H), 2.69 (tt, *J* = 11.5, 3.7 Hz, 1 H), 2.21 (s, 3 H), 1.90 (d, *J* = 12.9 Hz, 2 H), 1.57 (qd, *J* = 12.4, 4.2 Hz, 2 H); <sup>13</sup>C NMR (101 MHz, CD<sub>3</sub>OD) δ 156.4, 144.0, 139.6, 134.6, 128.1, 126.9, 126.5, 122.6, 120.8, 60.9, 56.5, 43.5, 36.6, 27.7; IR (NaCl, film) 3625, 3127, 3054, 2944, 2855, 2796, 2360, 1636, 1595, 1569, 1536, 1501, 1447, 1353, 1329, 1306, 1243, 1160, 1100, 1041 cm<sup>-1</sup>. HRMS (ESI) *m/z* calcd for C<sub>20</sub>H<sub>23</sub>Cl<sub>2</sub>N<sub>3</sub>O (M+Na)<sup>+</sup> 414.1110; found 414.1121.

**1-(2-(1H-Pyrrolo[2,3-b]pyridin-3-yl)ethyl)-N-(3,5-dichlorobenzyl)-N-methylpiperidin-4-amine (29f).** A solution of **27a** (50 mg, 0.18 mmol) and **31** (25 mg, 0.11 mmol) in MeCN (1 mL) was stirred under reflux and stirred for 8 h, whereupon the reaction was cooled to room temperature and stirred for an additional 72 h. The reaction mixture was concentrated via rotary evaporation, and the crude material was purified by flash chromatography eluting with Et<sub>2</sub>O/CH<sub>2</sub>Cl<sub>2</sub>/Et<sub>3</sub>N (100:0:1 → 66:33:1) to give 15 mg (33%) of **29f** as an amorphous white solid. <sup>1</sup>H NMR (400 MHz, CD<sub>3</sub>OD) δ 8.20 (d, *J* = 4.3 Hz, 1 H), 8.09 (dd, *J* = 7.9, 1.5 Hz, 1 H), 7.35 (comp, 4 H), 7.14 (dd, *J* = 7.9, 4.8 Hz, 1 H), 4.60 (s, 3 H), 3.65 (s, 3 H), 3.38 (s, 1 H), 3.27 – 3.18 (comp, 4 H), 3.06 (s, 2 H), 2.80 (s, 1 H), 2.25 (s, 3 H), 2.12 (d, *J* = 13.2 Hz, 2 H), 1.88 (s, 2 H). <sup>13</sup>C NMR (101 MHz, (CD<sub>3</sub>)<sub>2</sub>SO) δ 198.2, 170.8, 148.9, 143.0, 134.3, 127.3, 127.0, 126.8, 123.9, 119.5, 115.3, 60.2, 56.4, 52.4, 37.8, 21.2, 14.5, 7.6. IR (NaCl, film) 3144, 3096, 3036, 2928, 2856, 2477, 2632, 1570, 1459, 1422, 1344, 1288, 1203, 1126, 1103, 1044 cm<sup>-1</sup>. HRMS (ESI) *m/z* calcd for C<sub>22</sub>H<sub>26</sub>Cl<sub>2</sub>N<sub>4</sub> (M+H)<sup>+</sup> 417.1607; found 417.1623.

**1-(2-(5-Methoxy-1H-indol-3-yl)ethyl)-N-methyl-N-(3-(methylthio)benzyl)piperidin-4-amine (29h).** A solution of **S22** (68 mg, 0.15 mmol) in THF (0.5 mL) was added to a stirred suspension of LiAlH<sub>4</sub> (57 mg, 1.5 mmol) in THF (1.0 mL) while cooling at 0 °C. The reaction vessel was removed from the ice bath and stirred while heating under reflux for 19 hours. The reaction vessel was then cooled to 0 °C, whereupon H<sub>2</sub>O (0.06 mL) was added, followed by 3M NaOH (0.06 mL) and H<sub>2</sub>O (0.18 mL). The mixture was stirred at room temperature for 30 min, during which time the visible precipitate turned from grey to white. MgSO<sub>4</sub> was added, and the mixture was stirred for an additional 30 minutes, and then filtered over a pad of celite, washing with EtOAc. The solution was concentrated via rotary evaporation, and the crude material was purified by flash chromatography eluting with hexanes/EtOAc/Et<sub>3</sub>N (25:75:1 → 0:100:1) to

give 42 mg (66%) of **29h** as an amorphous off-white solid. <sup>1</sup>H NMR (400 MHz) δ 7.87 (s, 1 H), 7.25 – 7.20 (comp, 2 H), 7.11 (comp, 2 H), 7.05 (d, *J* = 2.4 Hz, 1 H), 7.00 (d, *J* = 2.4 Hz, 1 H), 6.85 (dd, *J* = 8.8, 2.4 Hz, 1 H), 3.86 (d, *J* = 0.6 Hz, 3 H), 3.56 (s, 2 H), 3.15 (d, *J* = 11.3 Hz, 2 H), 2.98 – 2.90 (comp, 2 H), 2.71 – 2.63 (comp, 2 H), 2.49 (comp, 4 H), 2.25 – 2.19 (s, 3 H), 2.04 (t, *J* = 11.2 Hz, 2 H), 1.85 (d, *J* = 12.1 Hz, 2 H), 1.74 (td, *J* = 12.0, 3.9 Hz, 2 H). <sup>13</sup>C NMR (101 MHz) δ 153.9, 140.9, 138.2, 131.3, 128.7, 127.8, 126.8, 125.5, 124.9, 122.3, 114.2, 112.1, 111.8, 110.0, 100.7, 59.2, 57.8, 56.0, 53.5, 37.8, 27.8, 23.2, 15.8. IR (NaCl, film) 3415, 3163, 3047, 2926, 2854, 2807, 1624, 1587, 1484, 1452, 1356, 1301, 1261, 1216, 1172, 1144, 1099, 1037 cm<sup>-1</sup>. LRMS (ESI) *m/z* calcd for C<sub>25</sub>H<sub>33</sub>N<sub>3</sub>OS (M+Na)<sup>+</sup> 446.2237; found 446.2249.

**1-(2-(5-Methoxy-1H-indol-3-yl)ethyl)-N-(3-methoxybenzyl)-N-methylpiperidin-4-amine**

**(29g)**. The title compound was prepared following the procedure described for **29h**. The crude material purified by flash chromatography eluting with hexanes/EtOAc/Et<sub>3</sub>N (25:75:1 → 0:100:1) to give 23 mg (62%) of **29g** as a yellow paste. <sup>1</sup>H NMR (400 MHz) δ 7.85 (s, 1 H), 7.25 – 7.20 (comp, 2 H), 7.05 (d, *J* = 2.4 Hz, 1 H), 7.01 (d, *J* = 2.3 Hz, 1 H), 6.94 – 6.89 (comp, 2 H), 6.85 (dd, *J* = 8.8, 2.5 Hz, 1 H), 6.79 (dd, *J* = 8.1, 2.6 Hz, 1 H), 3.86 (s, 3 H), 3.81 (s, 3 H), 3.58 (s, 2 H), 3.16 (d, *J* = 11.2 Hz, 2 H), 2.98 – 2.91 (comp, 2 H), 2.72 – 2.63 (comp, 2 H), 2.56-2.44 (m, 1 H), 2.24 (s, 3 H), 2.10 – 2.00 (comp, 2 H), 1.86 (d, *J* = 12.6 Hz, 2 H), 1.80 – 1.68 (comp, 2 H). <sup>13</sup>C NMR (101 MHz) δ 159.7, 153.9, 141.9, 131.4, 129.1, 127.9, 122.3, 121.1, 114.1, 112.3, 112.1, 111.8, 100.7, 60.8, 59.2, 57.9, 56.0, 55.2, 53.5, 37.8, 27.8, 23.2. IR (NaCl, film) 3415, 3154, 3046, 2941, 2831, 1587, 1487, 1455, 1357, 1308, 1267, 1216, 1170, 1147, 1120, 1045 cm<sup>-1</sup>. LRMS (ESI) *m/z* calcd for C<sub>25</sub>H<sub>33</sub>N<sub>3</sub>O<sub>2</sub> (M+H)<sup>+</sup> 408.2646; found 408.2643.

**N-Benzyl-1-(2-(5-methoxy-1H-indol-3-yl)ethyl)-N-methylpiperidin-4-amine (29i)**. The title compound was prepared following the procedure described for **29h**. The crude material purified by flash chromatography eluting with hexanes/EtOAc/Et<sub>3</sub>N (25:75:1 → 0:100:1) to give 43 mg (96%) of **29i** as a yellow paste. <sup>1</sup>H NMR (400 MHz) δ 7.85 (s, 1 H), 7.35 – 7.29 (comp, 5 H), 7.24 – 7.21 (m, 1 H), 7.05 (d, *J* = 2.5 Hz, 1 H), 7.00 (d, *J* = 2.4 Hz, 1 H), 6.85 (dd, *J* = 8.8, 2.4 Hz, 1 H), 3.86 (s, 3 H), 3.60 (s, 2 H), 3.16 (d, *J* = 11.2 Hz, 2 H), 2.98 – 2.90 (comp, 2 H), 2.71 – 2.63 (comp, 2 H), 2.55-2.45 (m, 1 H), 2.22 (s, 3 H), 2.09 – 2.00 (comp, 2 H), 1.86 (d, *J* = 12.6 Hz, 2 H), 1.79 – 1.73 (comp, 2 H). <sup>13</sup>C NMR (101 MHz) δ 153.9, 140.0, 131.4, 128.8, 128.2, 127.9, 126.8, 122.3, 114.1, 112.1, 111.8, 100.7, 60.8, 59.2, 57.9, 56.0, 53.5, 37.8, 27.8, 23.2. IR (NaCl, film) 3416, 3155, 3030, 2942, 2801, 1625, 1584, 1487, 1452, 1360, 1305, 1261, 1216, 1173, 1143, 1118, 1035 cm<sup>-1</sup>. HRMS (ESI) *m/z* calcd for C<sub>24</sub>H<sub>31</sub>N<sub>3</sub>O (M+H)<sup>+</sup> 378.2540; found 378.2550.

### ***T. brucei* proliferation inhibition assay**

High-throughput proliferation assays were performed as described with minor alterations.<sup>2</sup> Bloodstream form Lister 427 *T. brucei* was maintained in log phase growth ( $<10^6$  cells/mL) in HMI-9 medium. Cultures for proliferation assays were inoculated at  $4 \times 10^3$  trypanosomes/mL and 50  $\mu$ L was dispensed into a black 384-well microplate with a MultiDrop Combi (Thermo Scientific). An additional 50  $\mu$ L of cell culture was manually added to each well of the first row of the plate. Solvent (50% DMSO) or 10 mM compound was added to each well of the first row of the plate to a final concentration of 0.5% or 100  $\mu$ M, respectively. Two technical replicates were prepared for each sample. Using an Eppendorf Xplorer automated multi-channel pipette, 50  $\mu$ L was taken from each well of the first row and transferred to the corresponding well in the second row. This was repeated down the rows of the plate, and 50  $\mu$ L was discarded from the last row. DNA content in each well was measured and plotted as a function of compound concentration.

### **Expression and purification of recombinant *TbMetRS***

A 30 mL solution of LB-ampicillin (100 mg/L) was inoculated with one colony of BL21 (de3) transformed with his-tagged *T. brucei* MetRS plasmid (plasmid was a generous gift from Prof. Wim J. G. Hol). The inoculated solution was cultured overnight at 30 °C, 150 RPM in a shaking incubator. The saturated culture was then diluted 100 x (10 mL : 1000 mL) in 3 x 1 L sterile LB and cultured at 37 °C, 200 RPM until an OD<sub>600</sub> of 0.6 was reached. At this time, IPTG was added to a final concentration of 0.5 mM, and the temperature of the incubator was reduced to 15 °C. Expression continued for 24 h, at which time the cells were harvested via centrifugation (15 min, 4000 x g) and the resulting cell pellet was stored at -80 °C until further use. Frozen cell pellets from 3 L culture were thawed and re-suspended in 30 mL of lysis buffer (25 mM HEPES pH 7.0, 500 mM NaCl, 5% glycerol, 10 mM imidazole, 10 mM MgCl<sub>2</sub>, 10 mM L-Met, 0.025% NaN<sub>3</sub>), DNase I (240  $\mu$ L) and phenylmethylsulfonyl fluoride (4 mg) were added, and the cells were lysed 2x in a cell press at 1200 psi and 1 drop/secflow rate. The lysate was clarified via centrifugation for 45 min at 12000 RPM, and the supernatant was purified on an NiNTA FPLC column (10  $\rightarrow$  30  $\rightarrow$  250 mM imidazole step gradient). Peak fractions were pooled and dialyzed into anion exchange buffer (25 mM HEPES pH 7.0, 5% glycerol, 10 mM L-Met, 0.025% NaN<sub>3</sub>), and then ran on an SP/HP FPLC column (0  $\rightarrow$  1M NaCl anion exchange buffer gradient). Peak fractions were concentrated via centrifugation, diluted (1:1) with glycerol and stored at -80 °C until use.

### ***TbMetRS* aminoacylation assay**

Protocol was adapted from the procedure of Cestari and Stuart.<sup>3</sup> Reactions were performed in 25 mM HEPES pH 9, 100 mM NaCl, 10 mM MgCl, 50 mM KCl, 1 mM DTT and 3% glycerol with 0.8 mg/mL yeast tRNA (Sigma), 0.2 mM L-methionine, 0.2 mM ATP, 0.1  $\mu$ M recombinant *TbMetRS*, and 2 U/mL pyrophosphatase (Sigma) in 50  $\mu$ L total volume. The reactions were performed in clear, flat-bottom 96-

well plates and incubated for 2 h at room temperature, whereupon 75  $\mu$ L of a 2:1 mixture of H<sub>2</sub>O and freshly prepared malachite green reagent<sup>4</sup> was added, and the mixture was incubated for 20 min. Absorbances were measured at 620 nM using a plate reader.

## References

---

1. Still, W. C.; Kahn, M.; Mitra, A. Rapid Chromatographic Technique for Preparative Separations with Moderate Resolution. *J. Org. Chem.* **1978**, *43*, 2923–2925.
2. Thomas, S. M.; Purmal, A.; Pollastri, M.; Mensa-Wilmot, K. Discovery of a Carbazole-Derived Lead Drug for Human African Trypanosomiasis. *Sci. Rep.* **2016**, *6*, 32083.
3. Cestari, I.; Stuart, K. A Spectrophotometric Assay for Quantitative Measurement of Aminoacyl-TRNA Synthetase Activity. *J Biomol Screen* **2012**, 1087057112465980.
4. Baykov, A. A.; Evtushenko, O. A.; Avaeva, S. M. A Malachite Green Procedure for Orthophosphate Determination and Its Use in Alkaline Phosphatase-Based Enzyme Immunoassay. *Anal. Biochem.* **1988**, *171*, 266–270.

PROTON\_01  
ARMVII133a

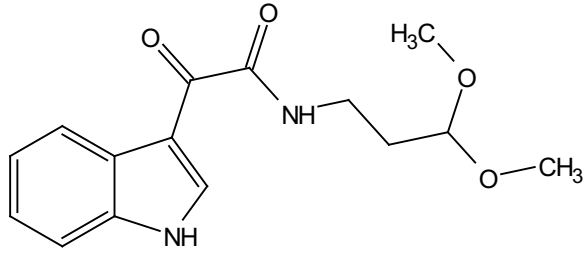

9.99  
9.01  
8.43  
8.43  
8.41  
8.40  
7.99  
7.97  
7.96  
7.40  
7.40  
7.40  
7.40  
7.38  
7.38  
7.38  
7.38  
7.32  
7.32  
7.31  
7.30  
7.30  
7.29  
7.28  
7.27  
7.27  
7.26  
7.26  
7.25  
7.25  
7.24  
7.23  
4.49  
4.48  
4.47  
3.50  
3.49  
3.49  
3.47  
3.47  
3.46  
3.36  
1.94  
1.92  
1.91  
1.91  
1.91  
1.89

10000  
9000  
8000  
7000  
6000  
5000  
4000  
3000  
2000  
1000  
0

13 12 11 10 9 8 7 6 5 4 3 2 1 0 -1

f1 (ppm)

1.00  
1.09  
1.09  
1.04  
1.12  
2.43  
1.16  
2.19  
6.56  
2.31

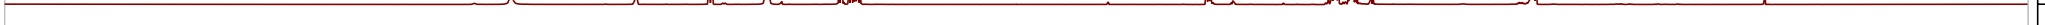



ARMV149aa\_01

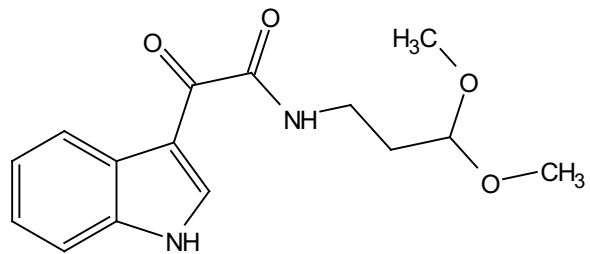

181.66

163.00

139.07

136.49

126.90

124.01

123.11

121.96

117.68

112.84

112.55

103.67

53.07

35.11

32.28

1.24

1.03

0.82 cd3cn

0.62 cd3cn

0.41 cd3cn

0.20

-0.00

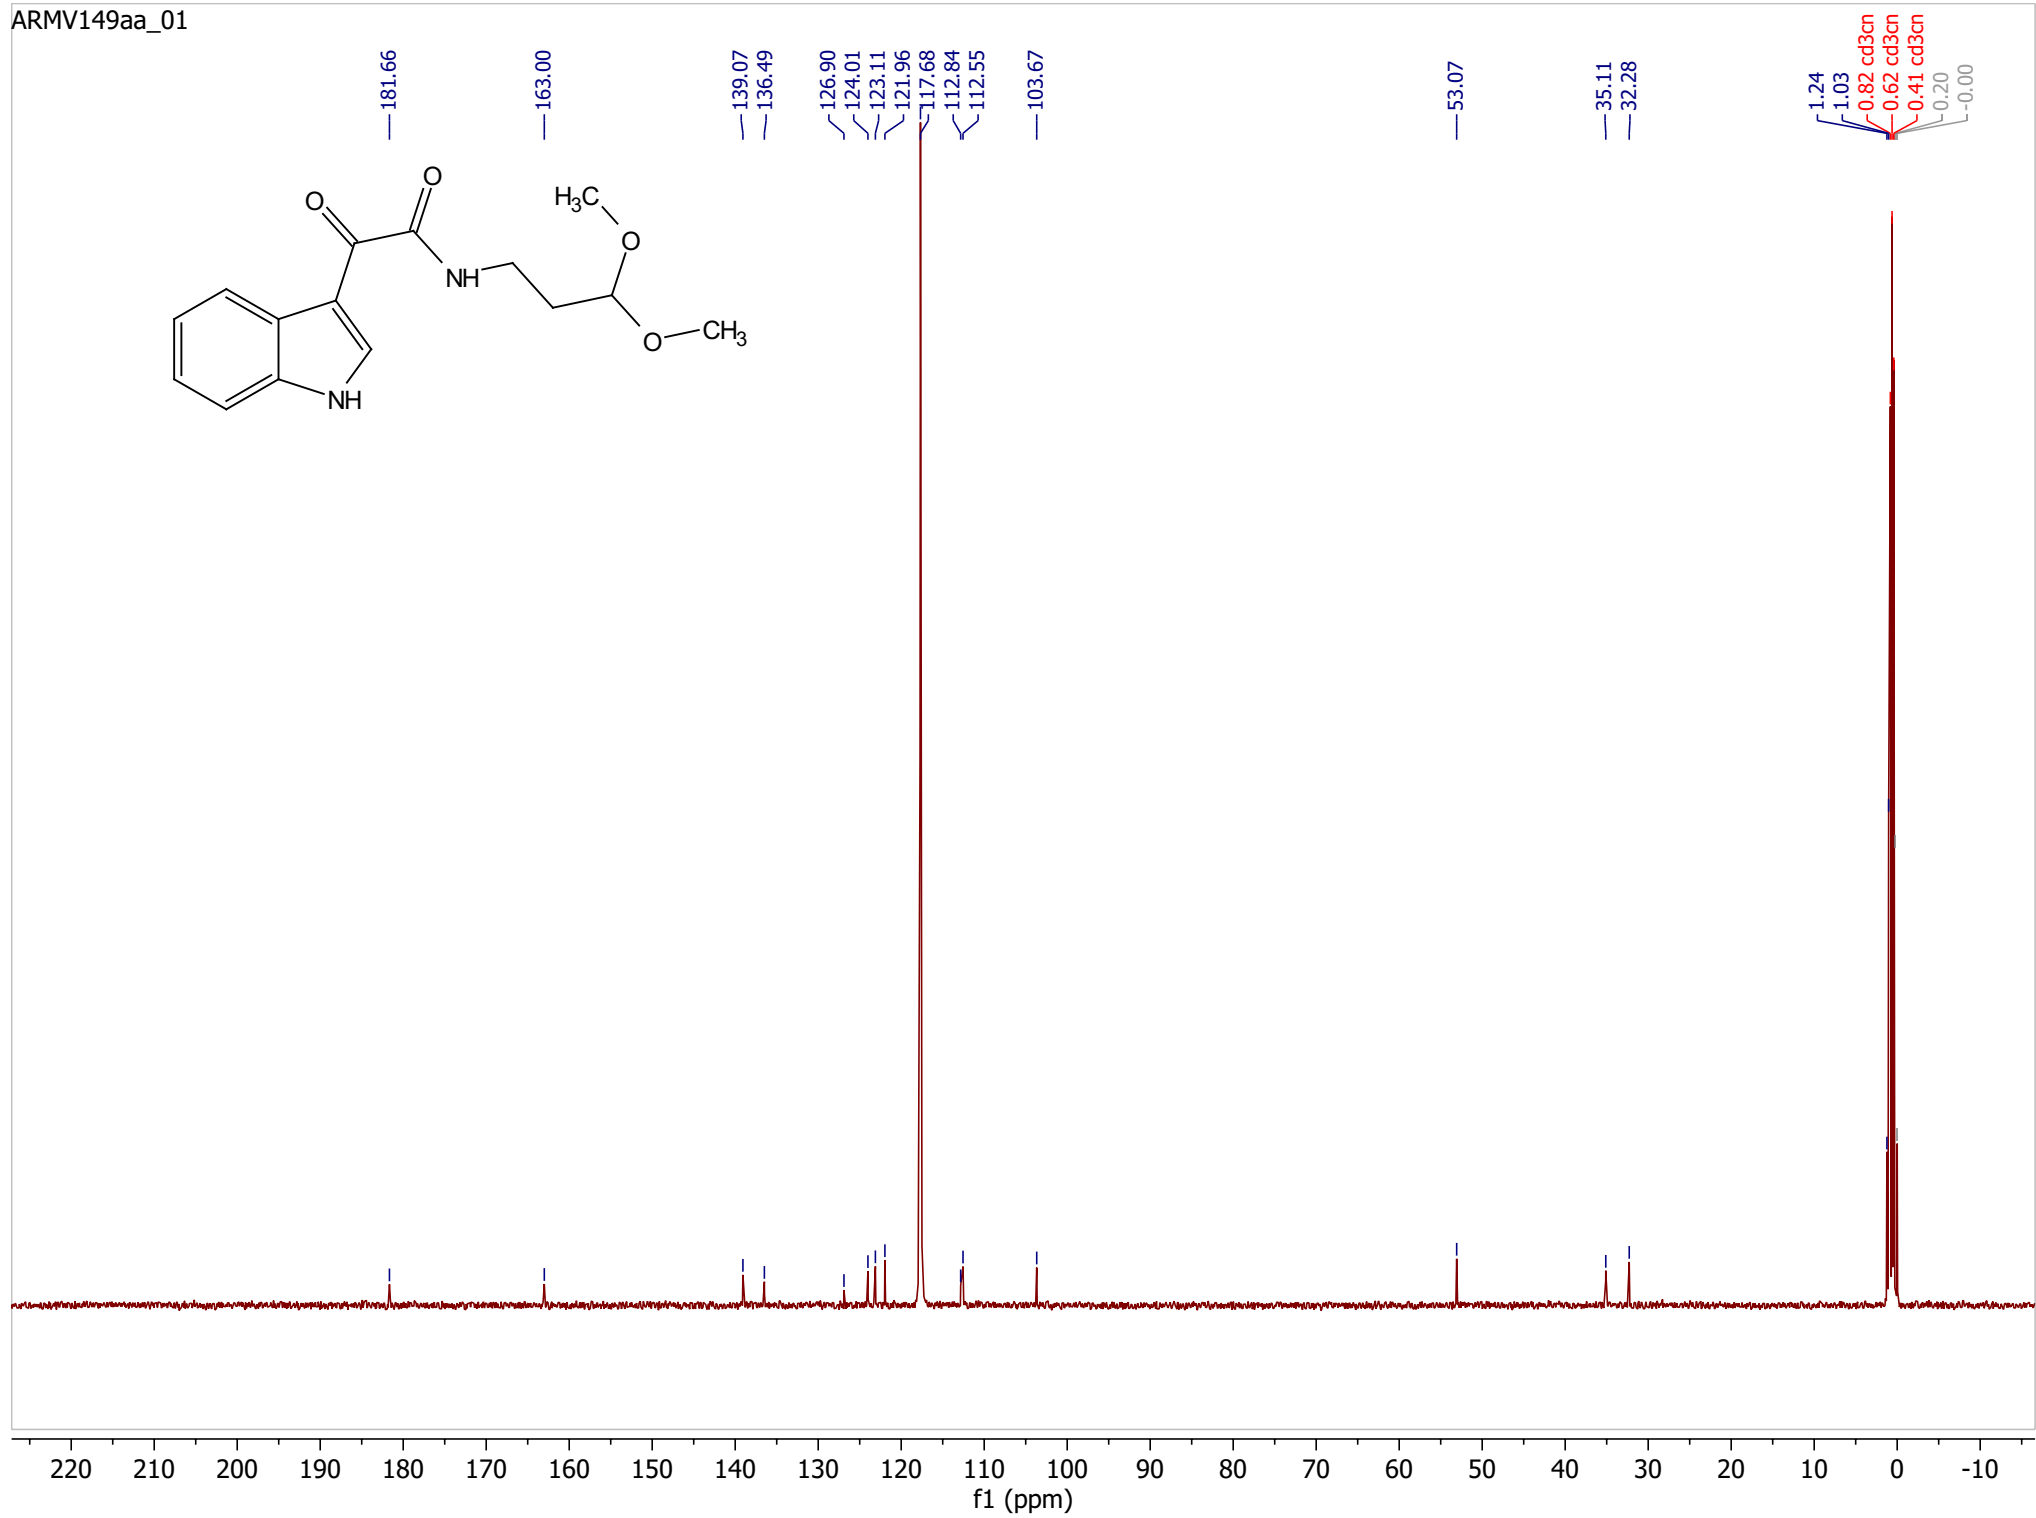

ARMV121C  
STANDARD 1H OBSERVE

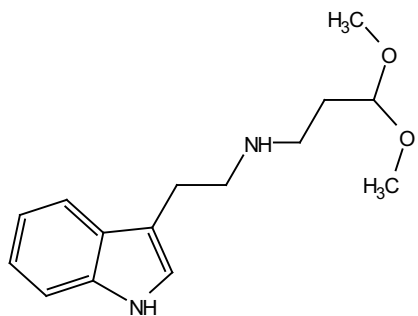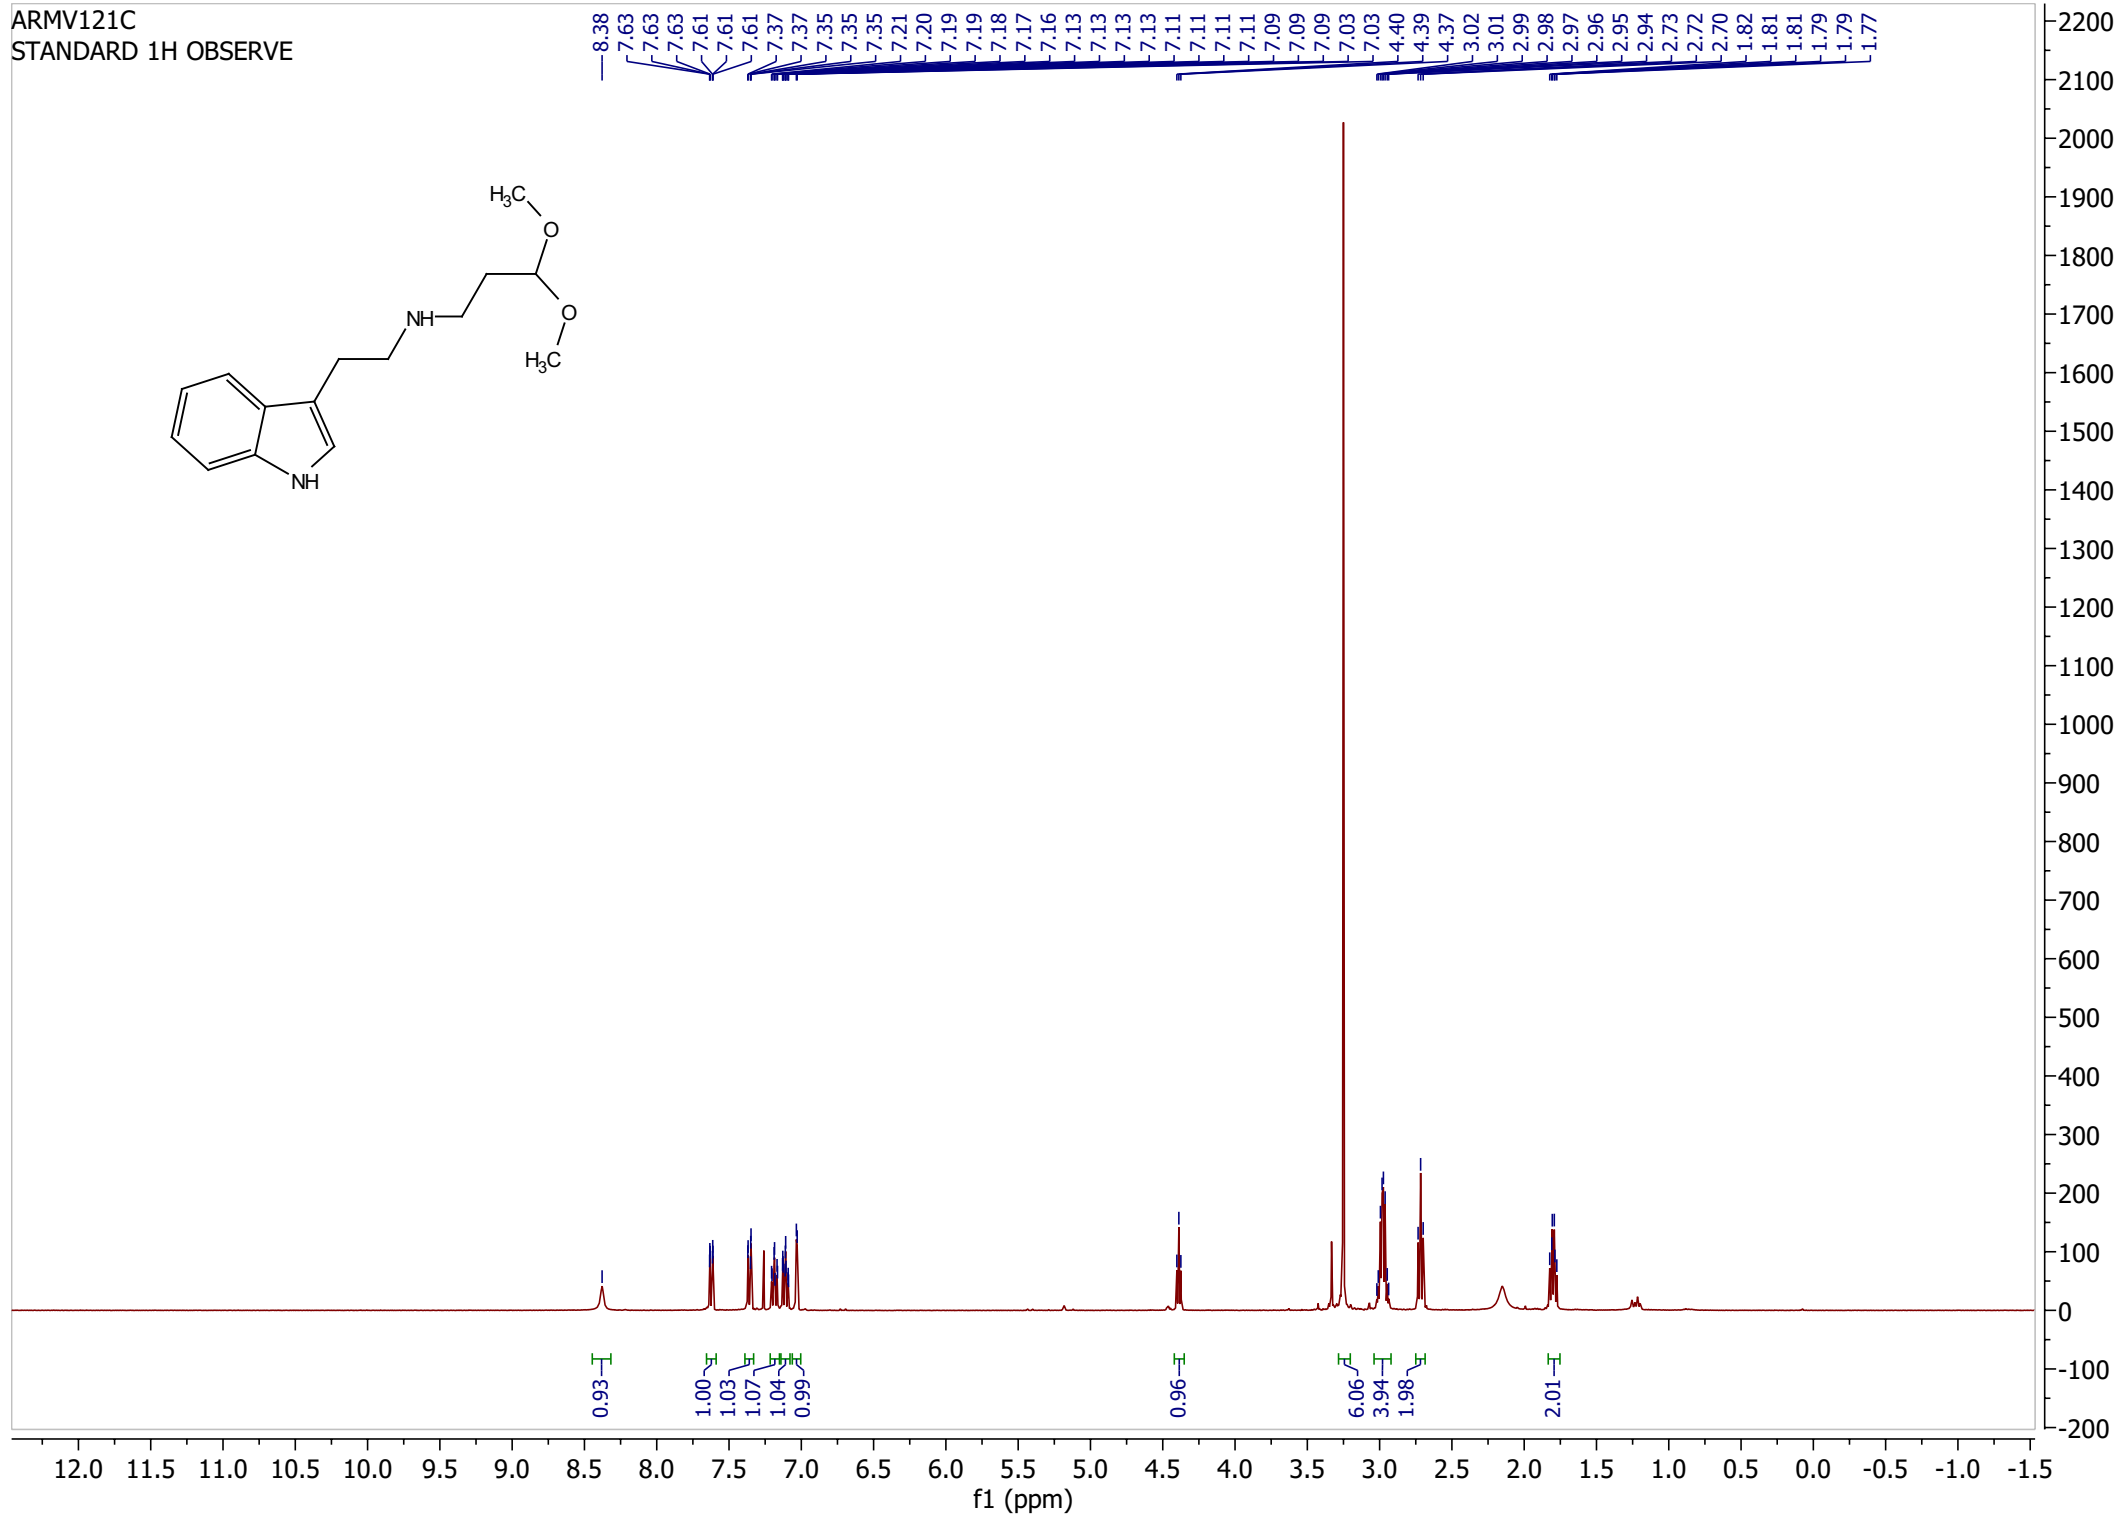

ARMVII\_02

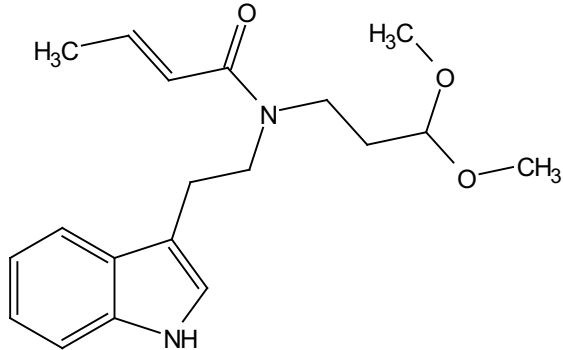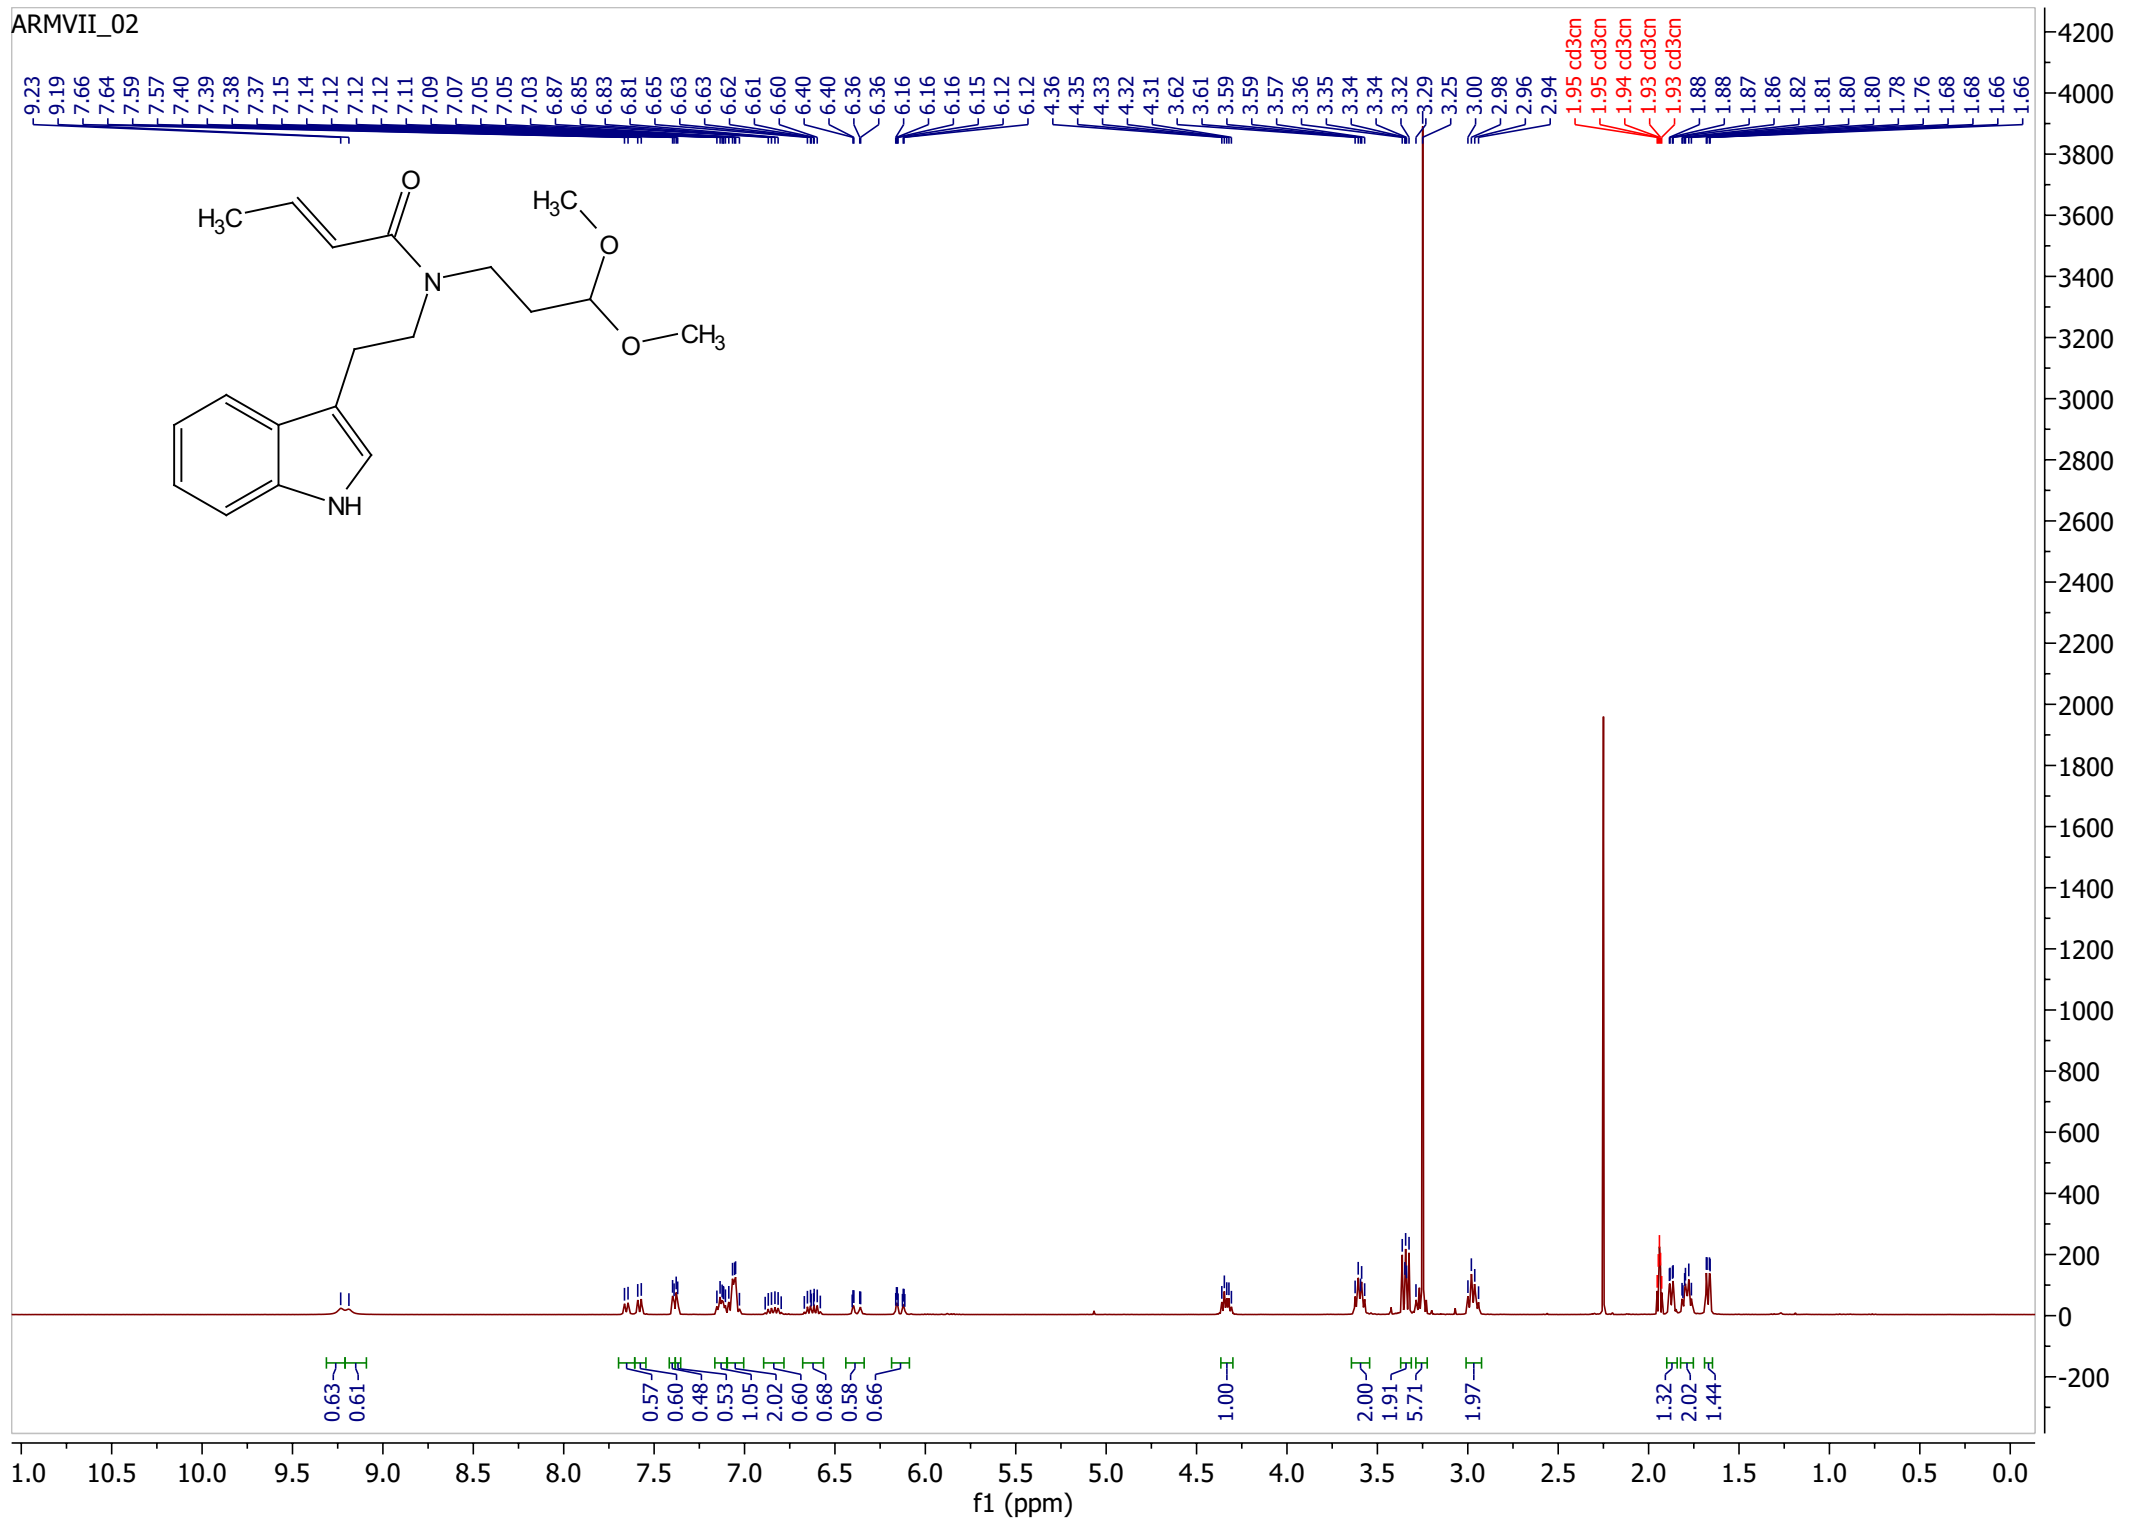

ARMVII\_01

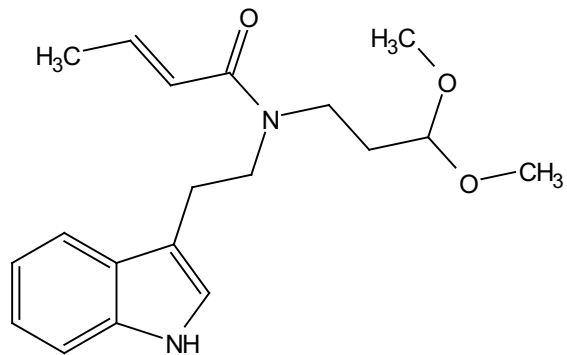

166.93  
166.73  
141.65  
140.80  
137.52  
128.52  
128.41  
124.08  
123.47  
123.38  
123.31  
122.47  
119.87  
119.73  
119.58  
119.18  
118.33  
113.64  
112.66  
112.38  
112.28  
103.79  
103.29

53.54  
53.24  
49.46  
48.25  
44.66  
43.26

33.46  
31.78  
25.96  
24.40  
18.22  
18.00

1.94  
1.73  
1.53 cd3cn  
1.32 cd3cn  
1.11 cd3cn  
0.91  
0.70

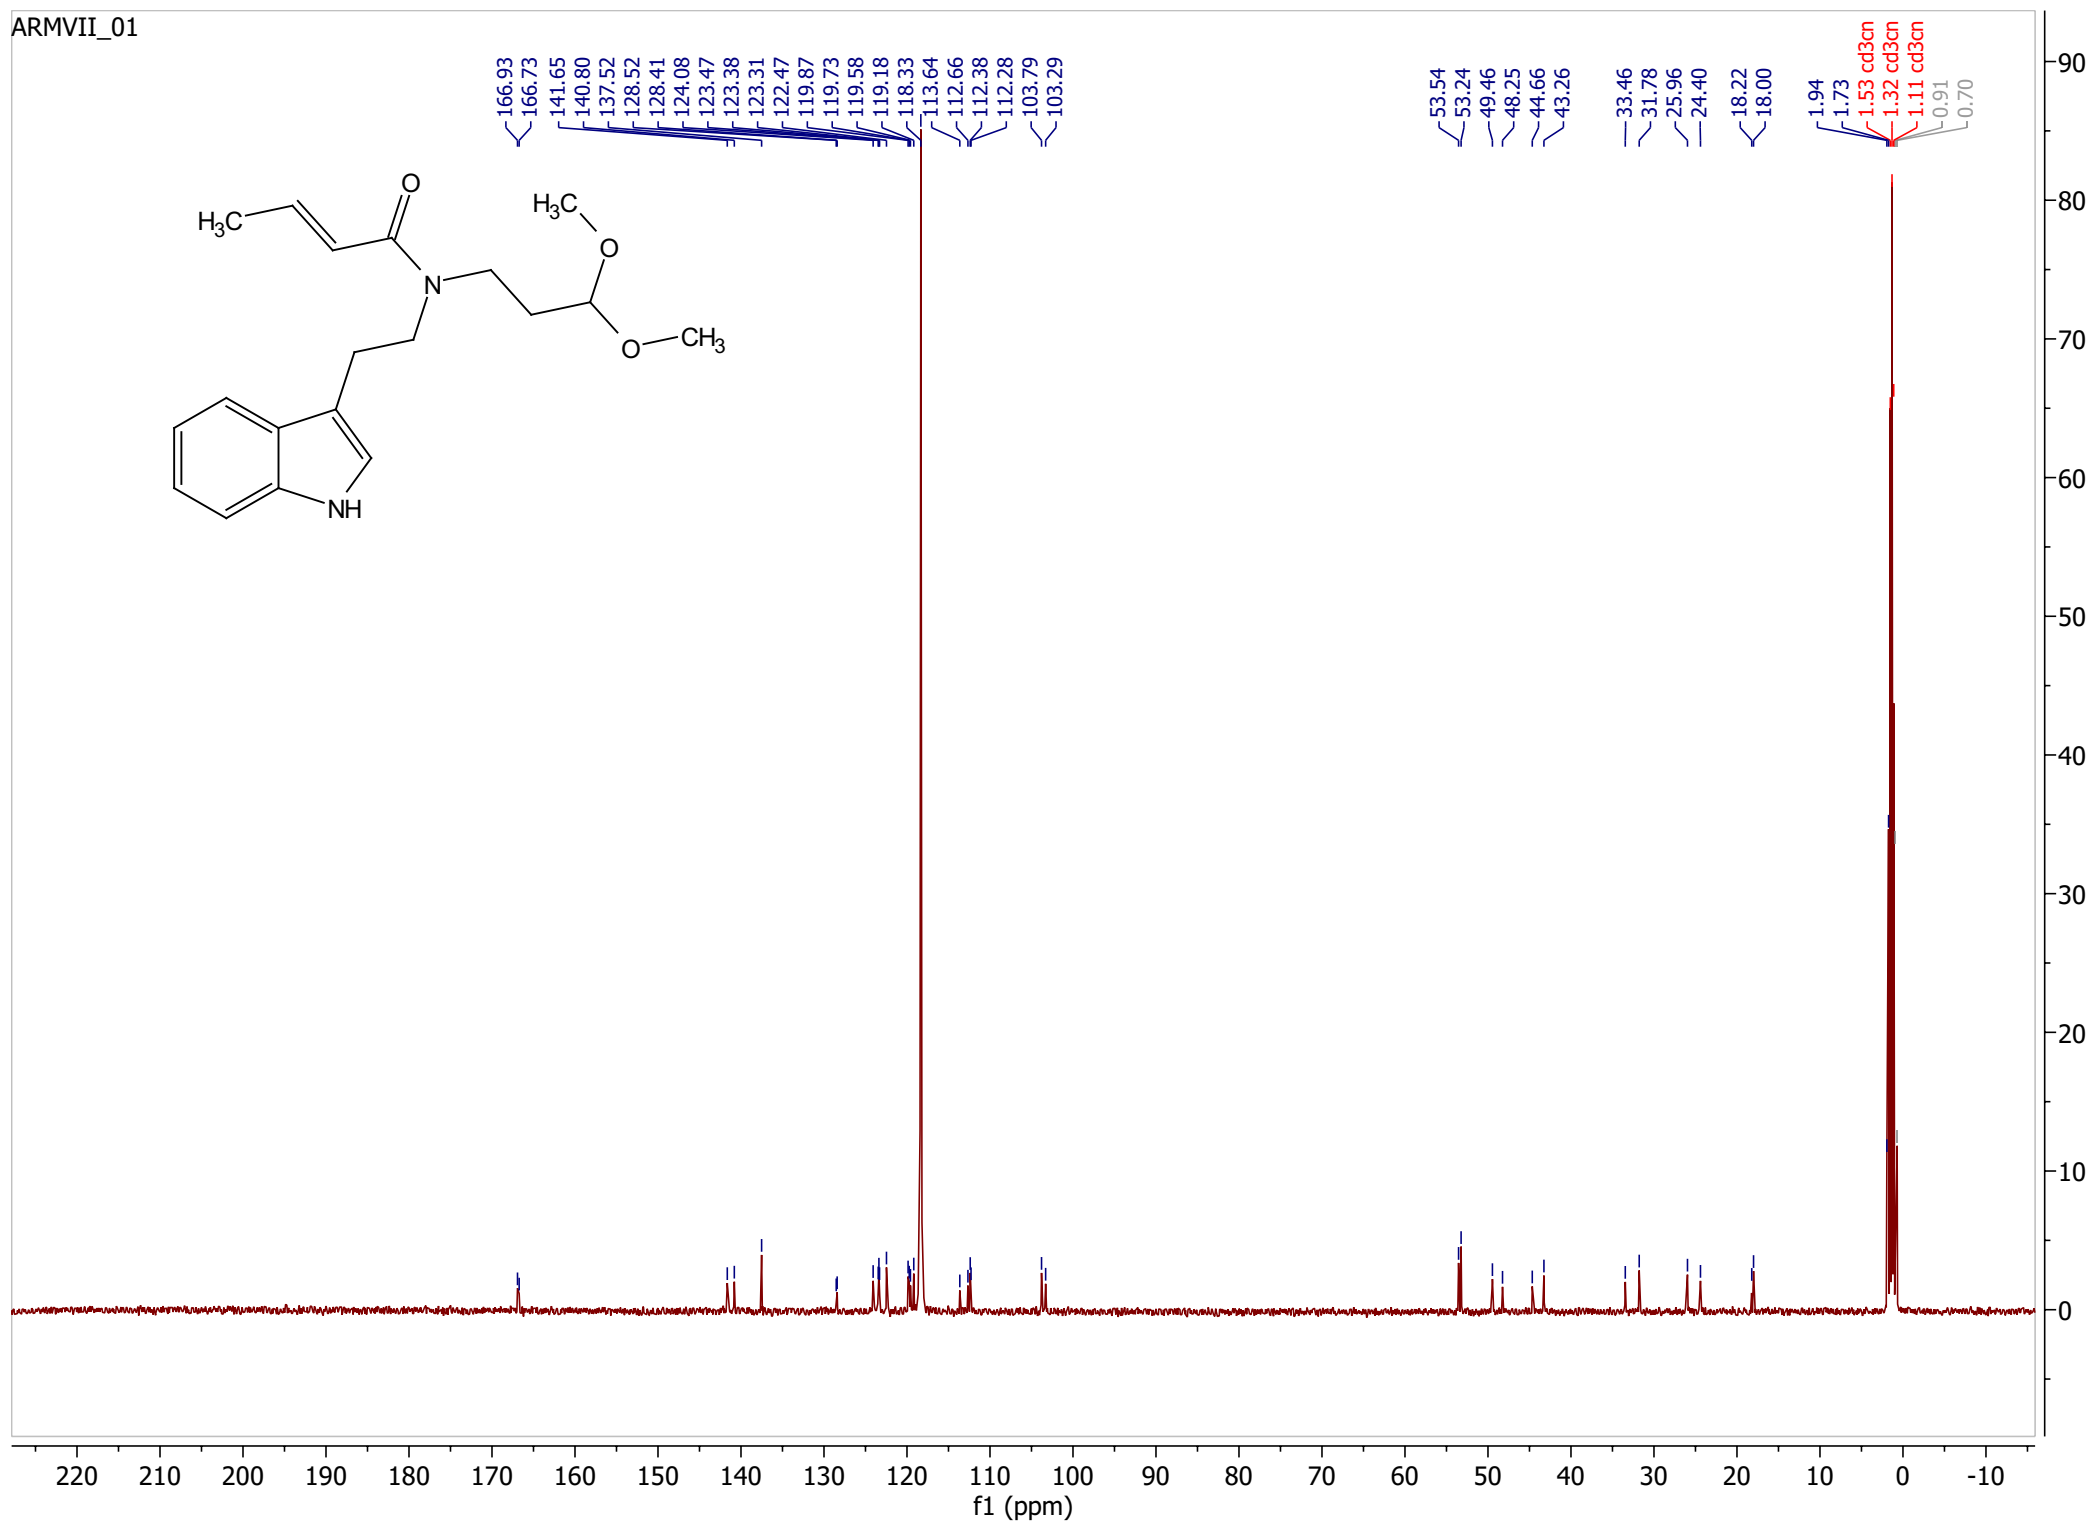

armv87a\_h1\_h1  
armv87a\_h1

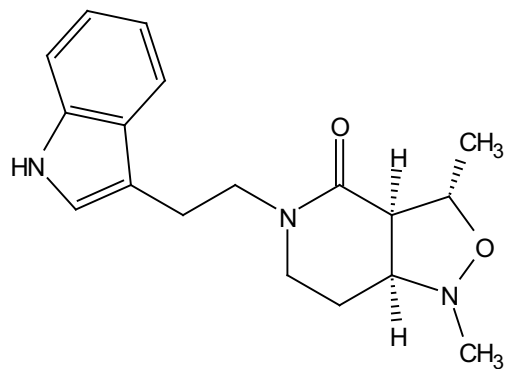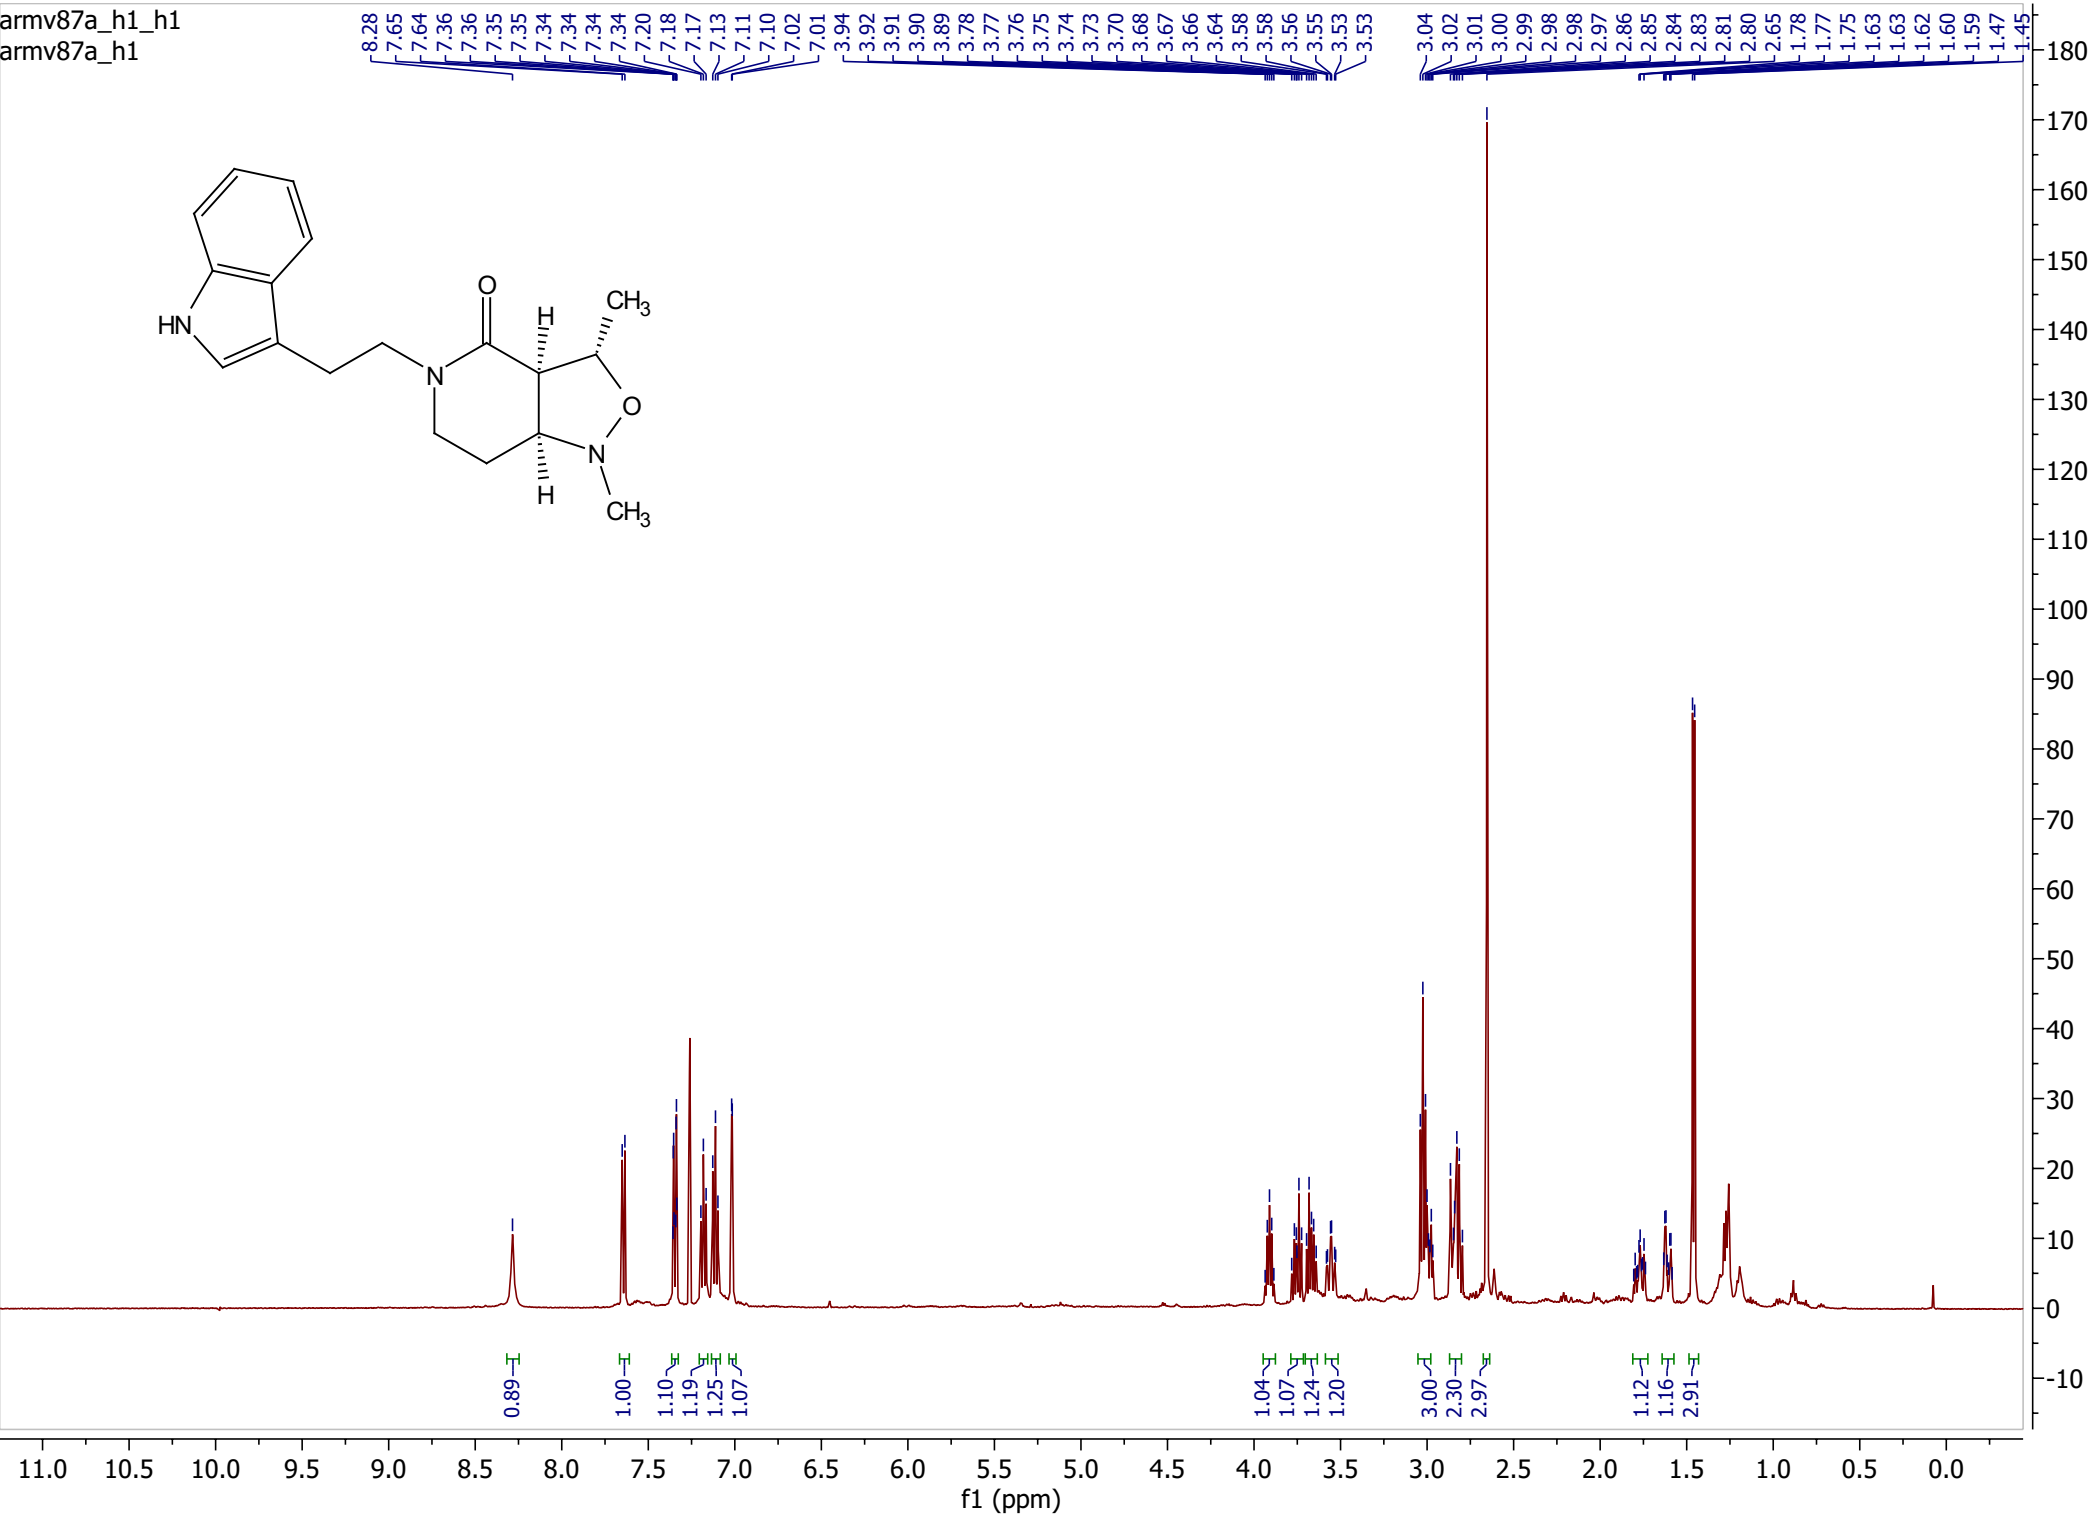

armv87a\_h1\_c13  
armv87a\_c13

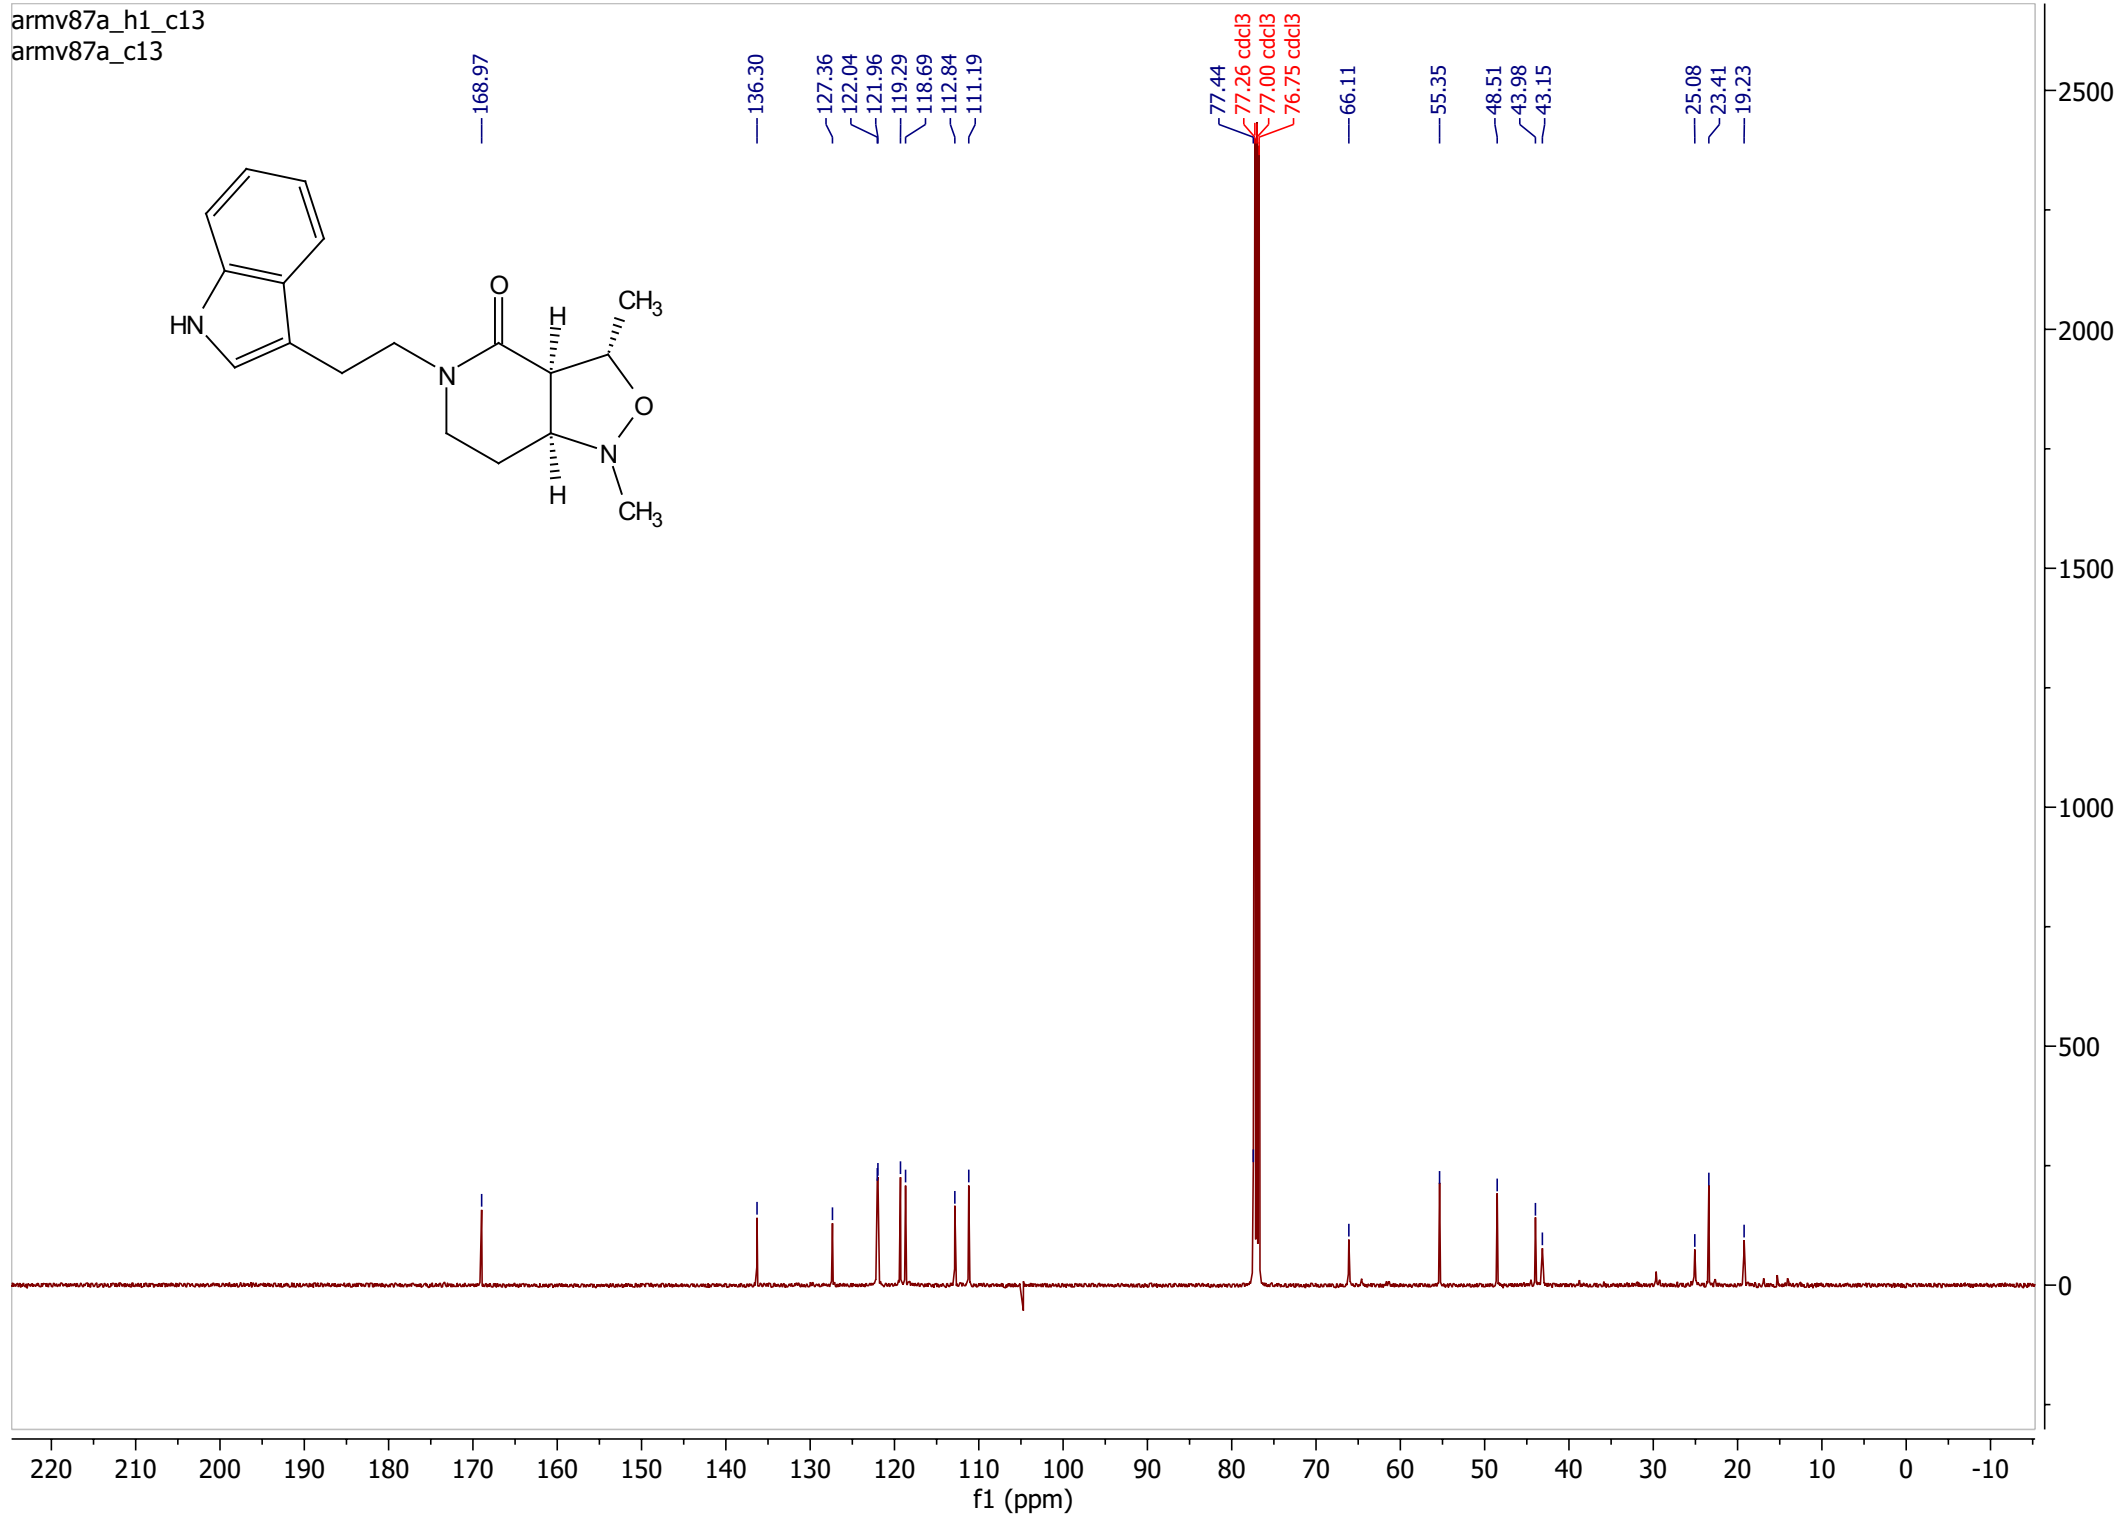

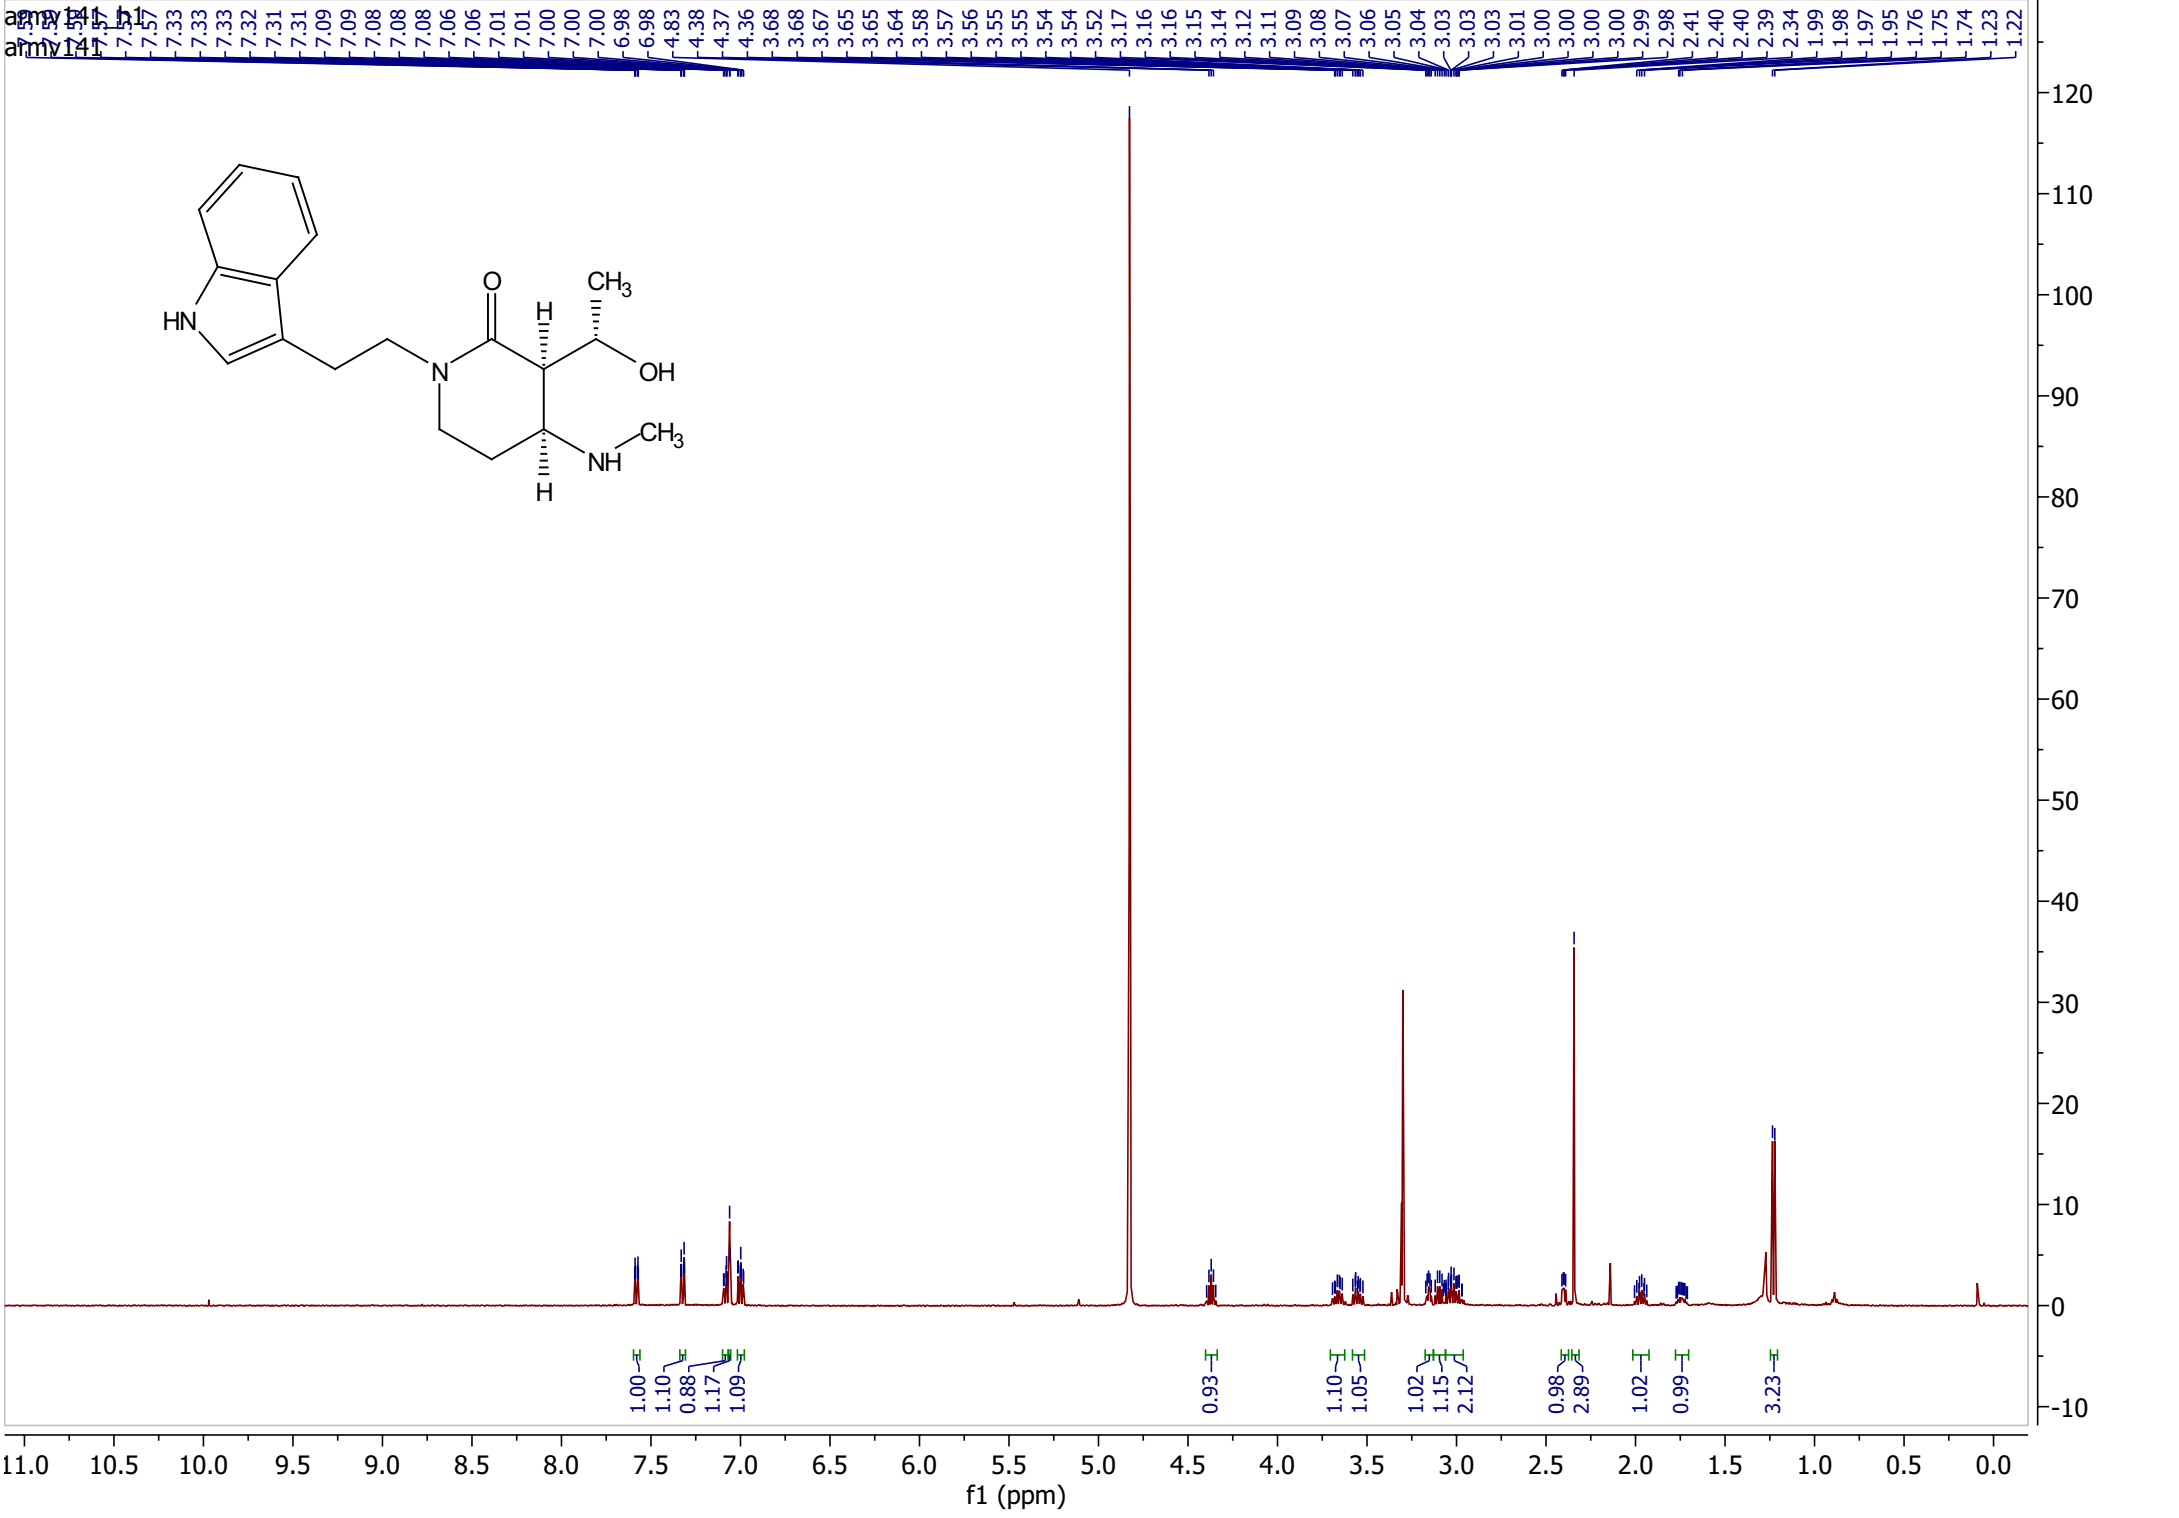

armv141\_c13  
armv141

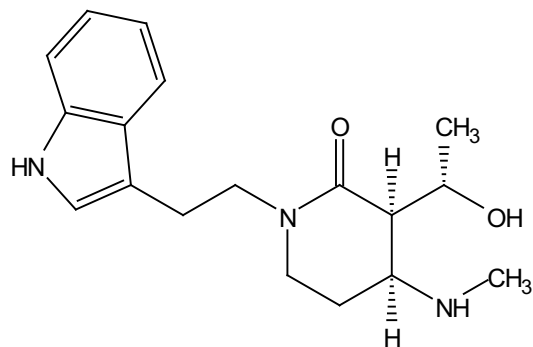

— 170.96

— 138.12

— 128.89

— 123.64

— 122.40

— 119.67

— 119.31

— 113.09

— 112.32

— 67.50

— 56.11

— 51.37

— 49.69

— 49.51 cd30d

— 49.34 cd30d

— 49.17 cd30d

— 49.00 cd30d

— 48.83 cd30d

— 48.66 cd30d

— 48.49 cd30d

— 45.69

— 33.48

— 30.77

— 24.81

— 23.73

— 22.46

220 210 200 190 180 170 160 150 140 130 120 110 100 90 80 70 60 50 40 30 20 10 0 -10

f1 (ppm)

24000  
22000  
20000  
18000  
16000  
14000  
12000  
10000  
8000  
6000  
4000  
2000  
0  
-2000



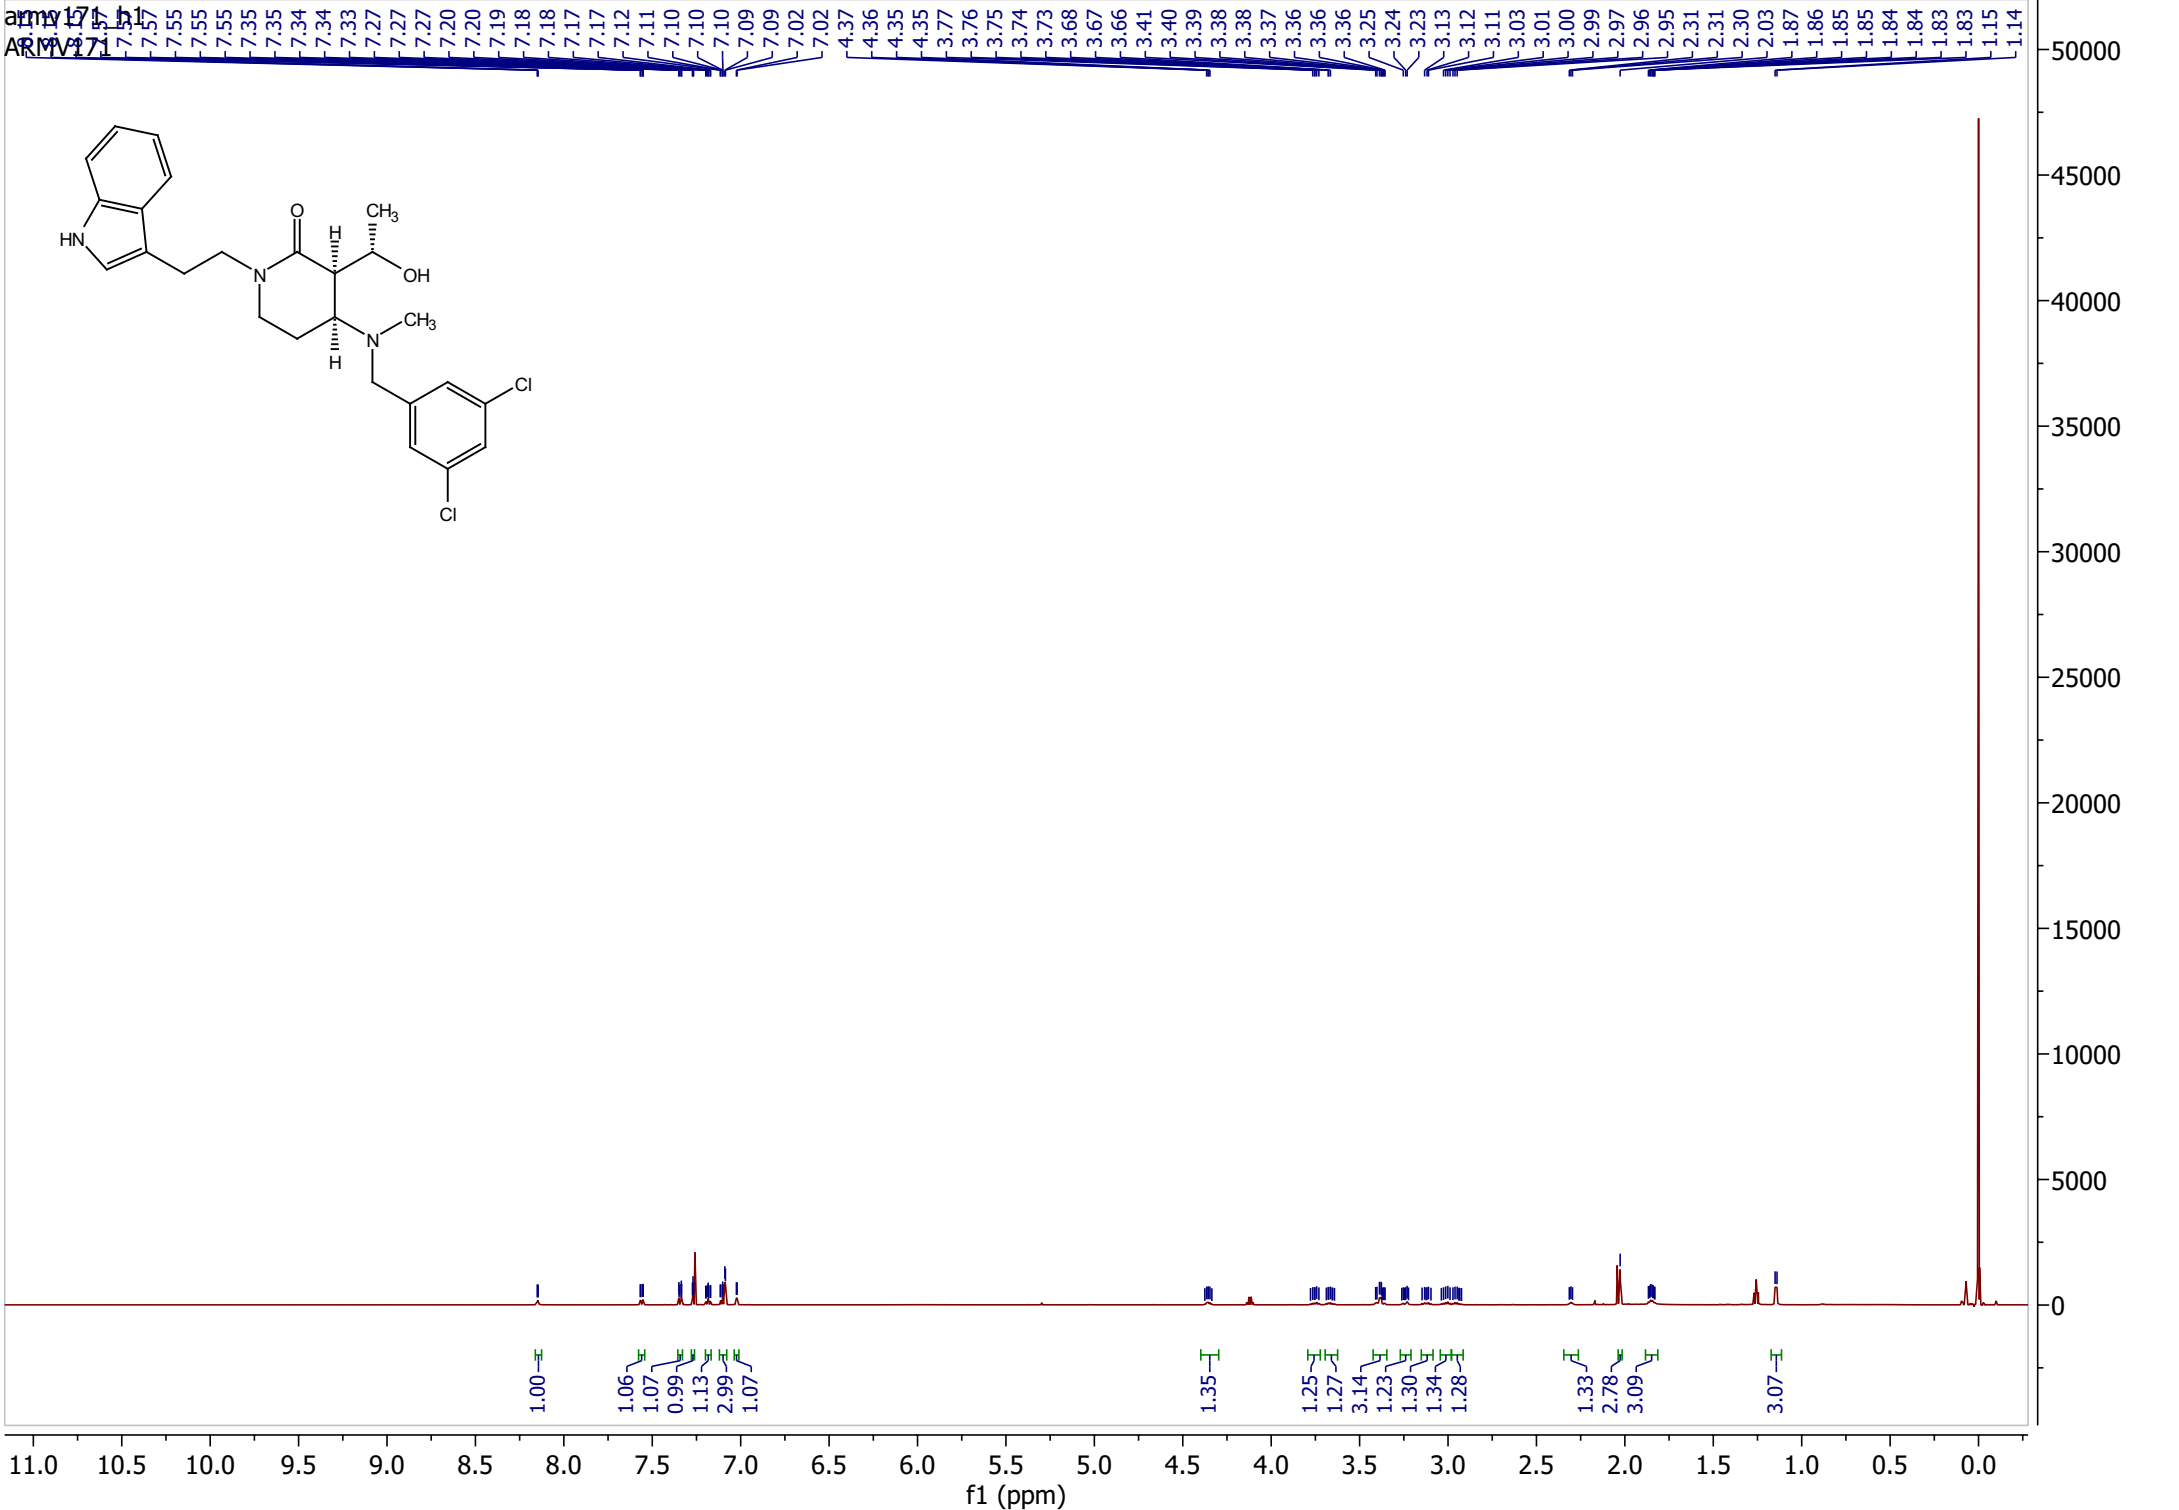

armv171\_c13 1  
ARMV171

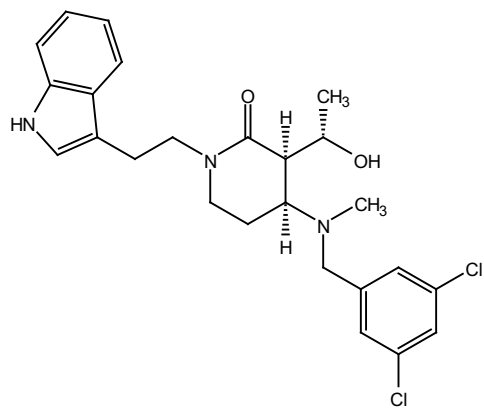

171.73

140.60  
136.25  
135.21  
128.08  
127.58  
127.25  
122.36  
122.14  
119.40  
118.36  
112.29  
111.53

77.23 cdcl3  
77.02 cdcl3  
76.81 cdcl3

66.15  
60.44  
58.93

47.96  
47.39  
44.92

37.33

29.71

23.18  
21.74  
21.07

14.20

-0.00

230 220 210 200 190 180 170 160 150 140 130 120 110 100 90 80 70 60 50 40 30 20 10 0 -10

f1 (ppm)

1100  
1000  
900  
800  
700  
600  
500  
400  
300  
200  
100  
0  
-100

ARM-75D-01

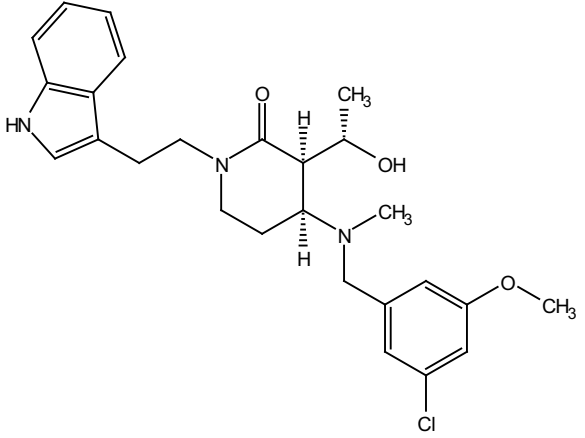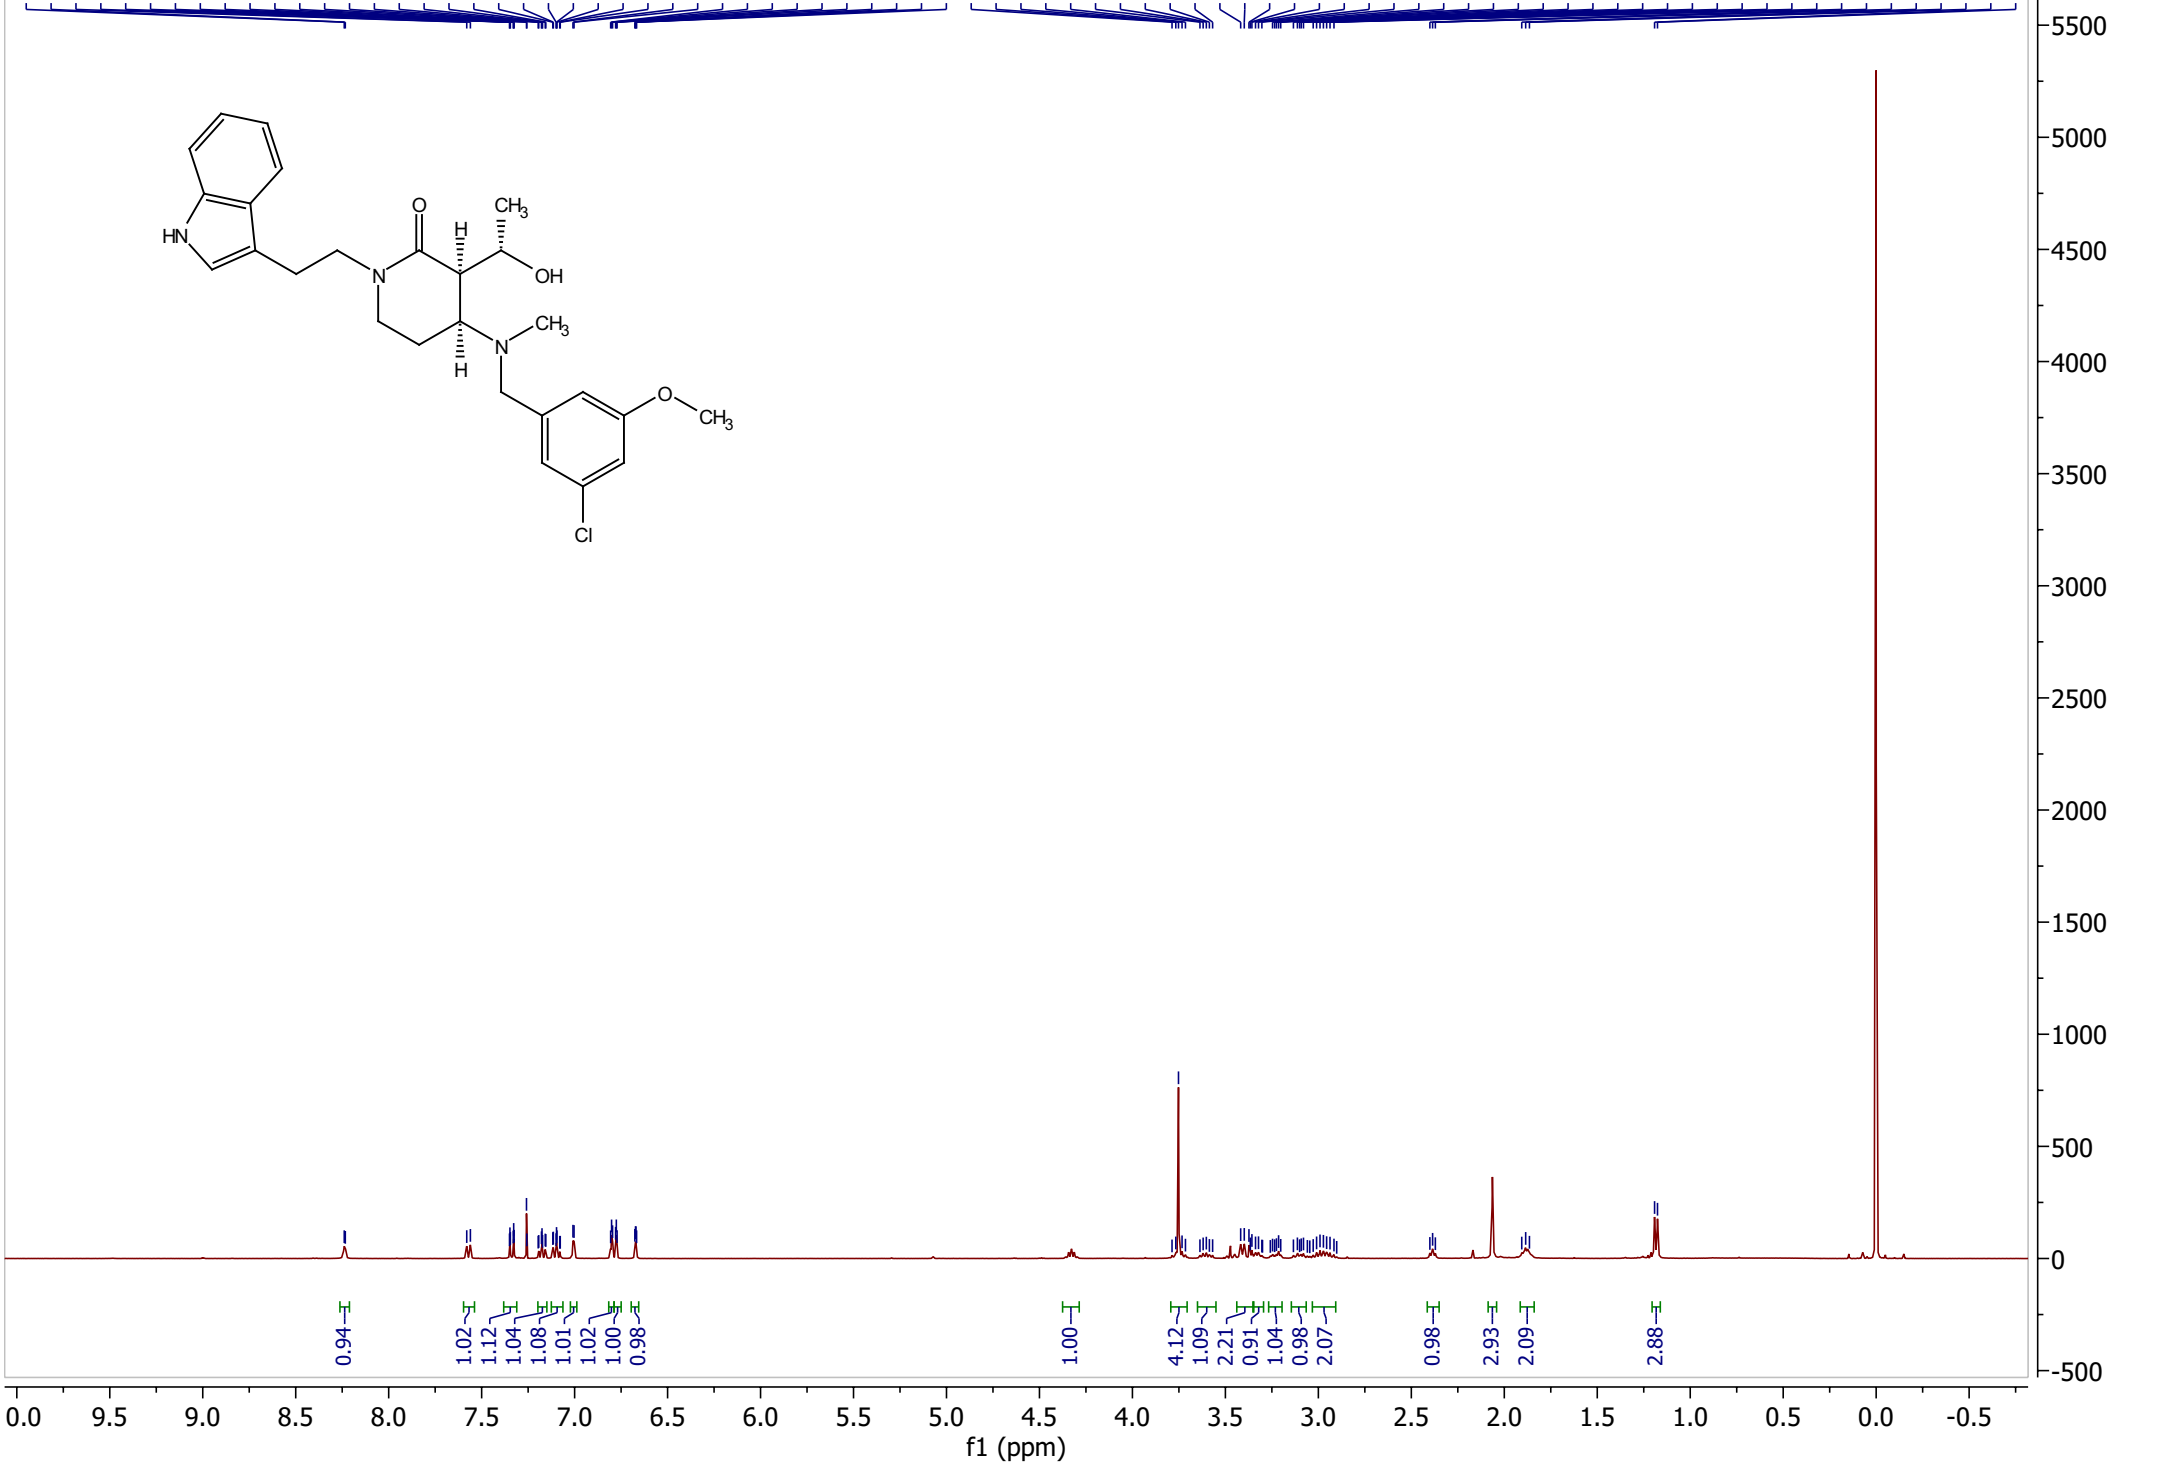

ARMV175D\_01 1

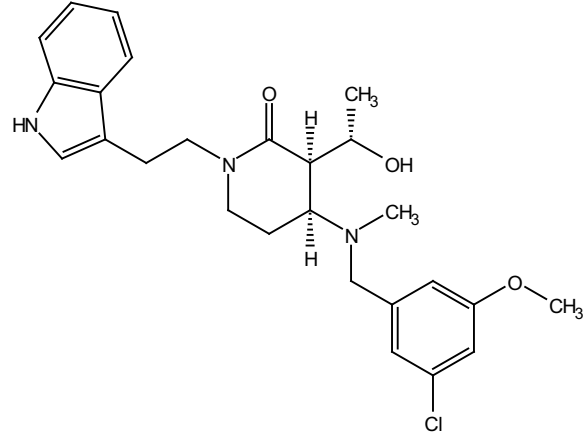

170.97  
160.48  
139.65  
136.24  
135.04  
127.31  
122.30  
122.07  
121.40  
119.36  
118.43  
113.65  
113.44  
112.38  
111.45

66.31  
59.05  
57.97  
55.56  
48.46  
47.43  
45.04  
37.54

23.13  
22.08  
20.48

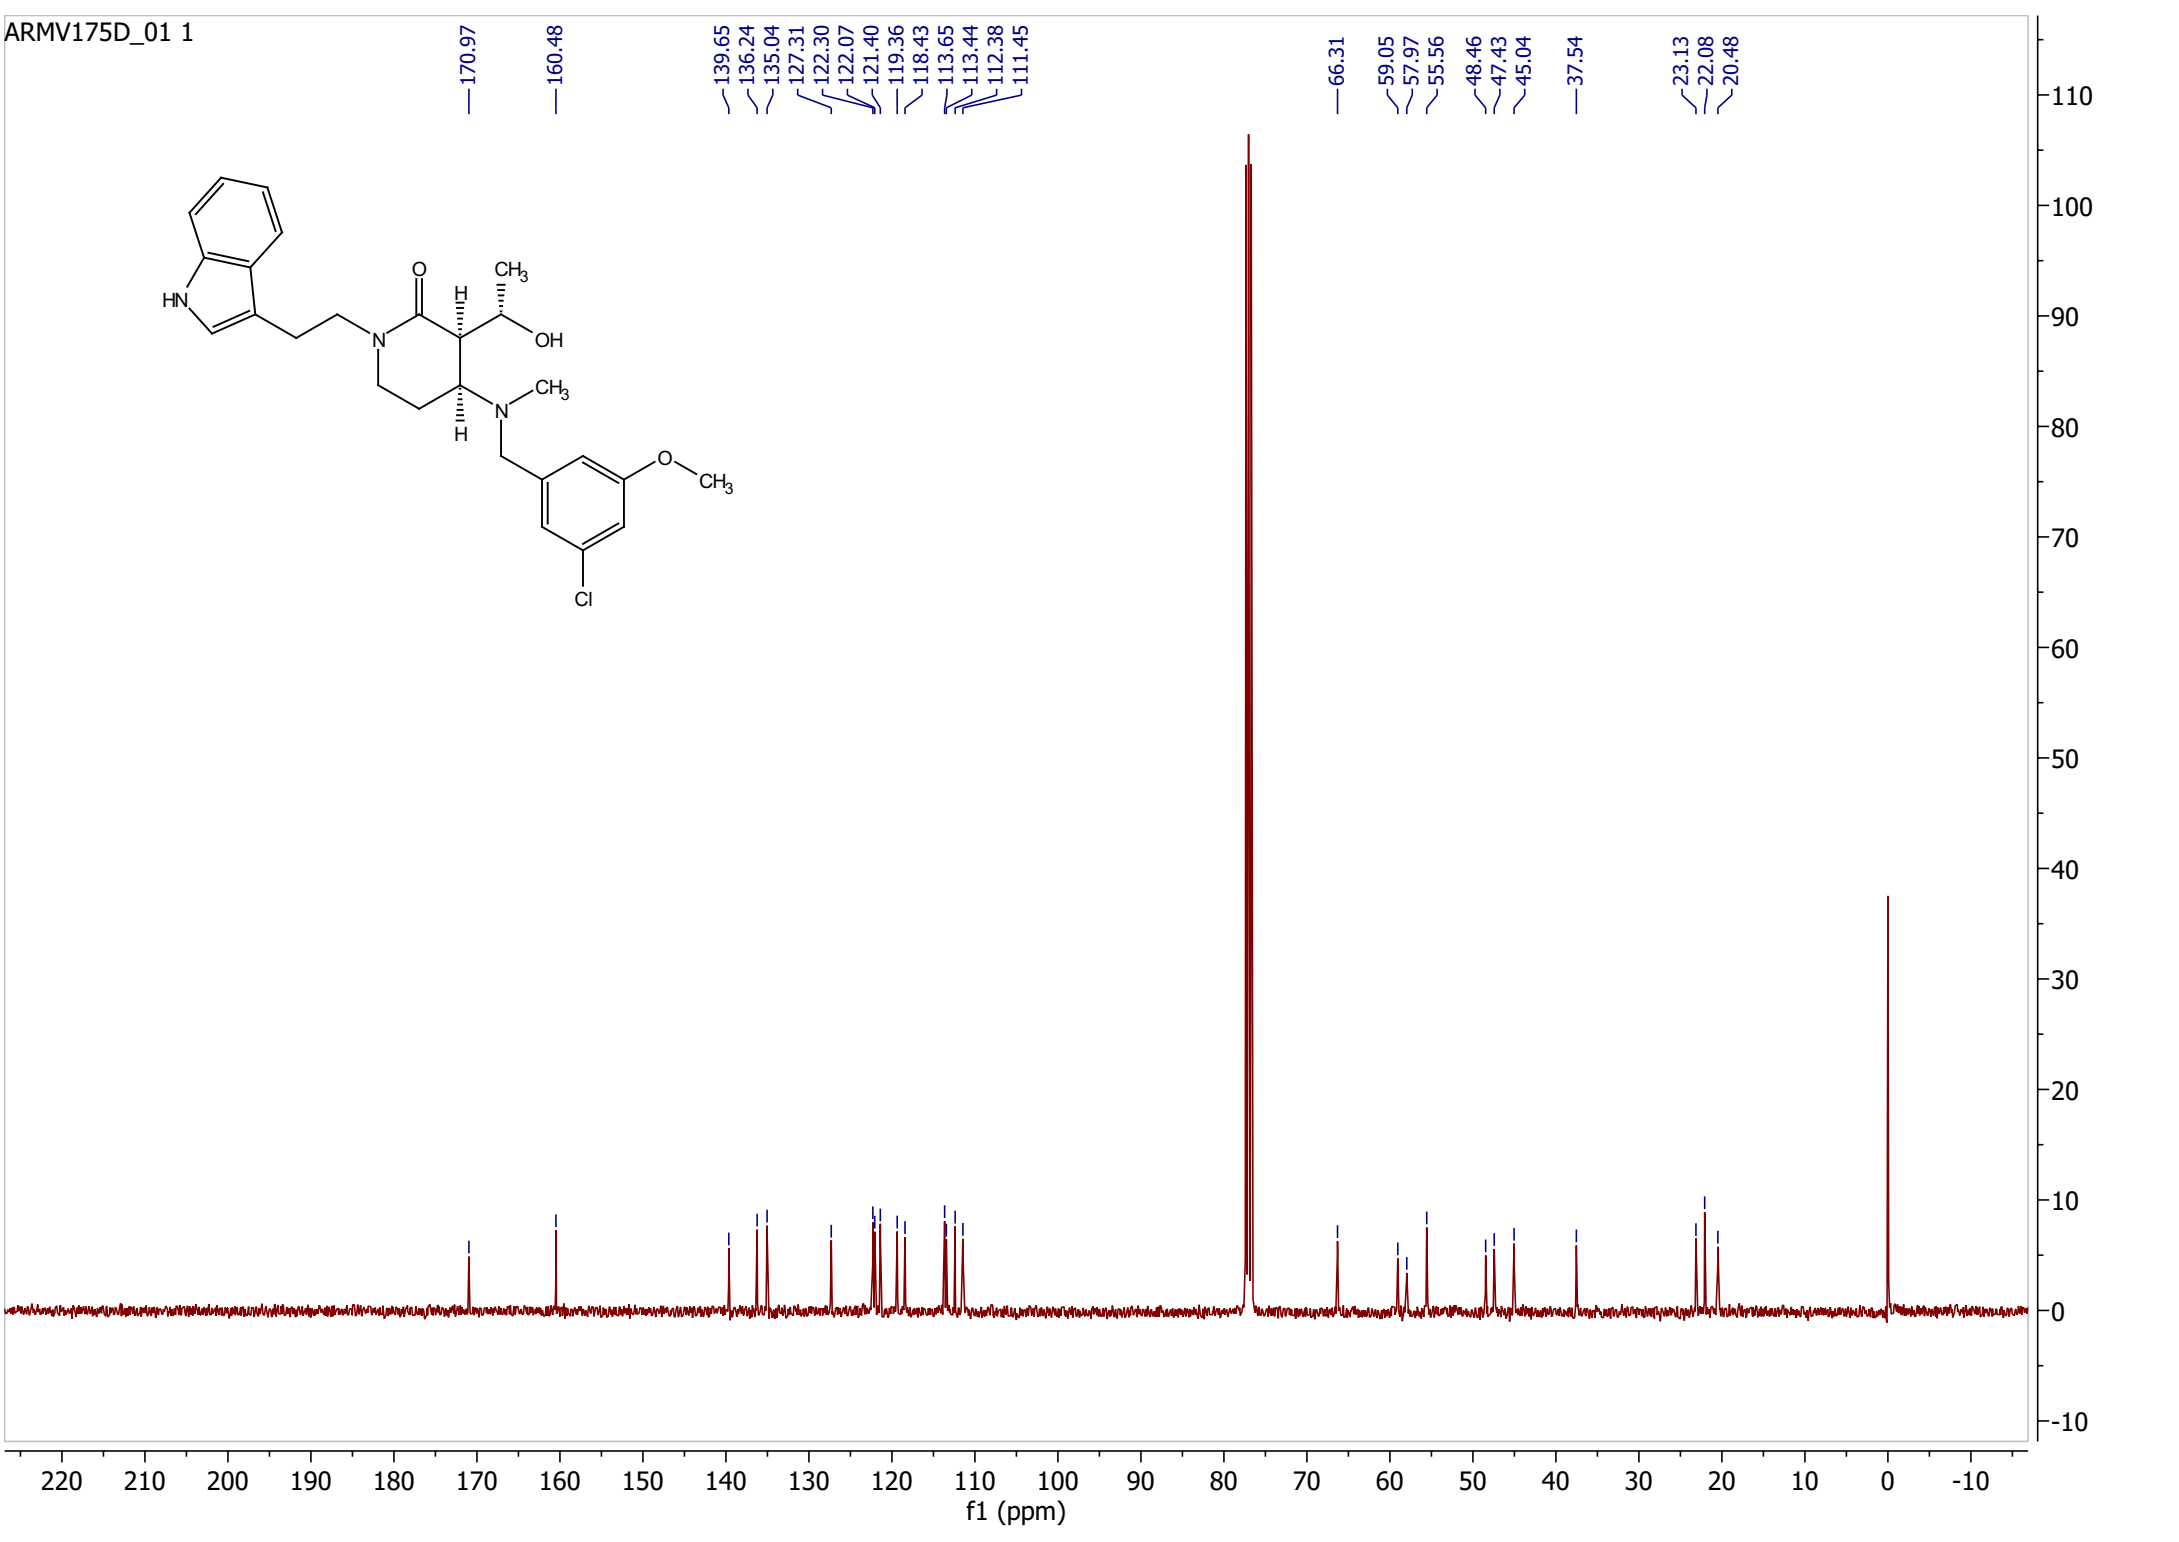

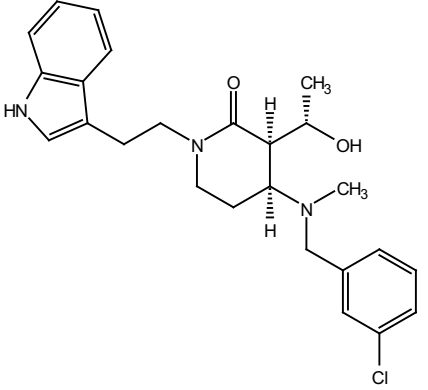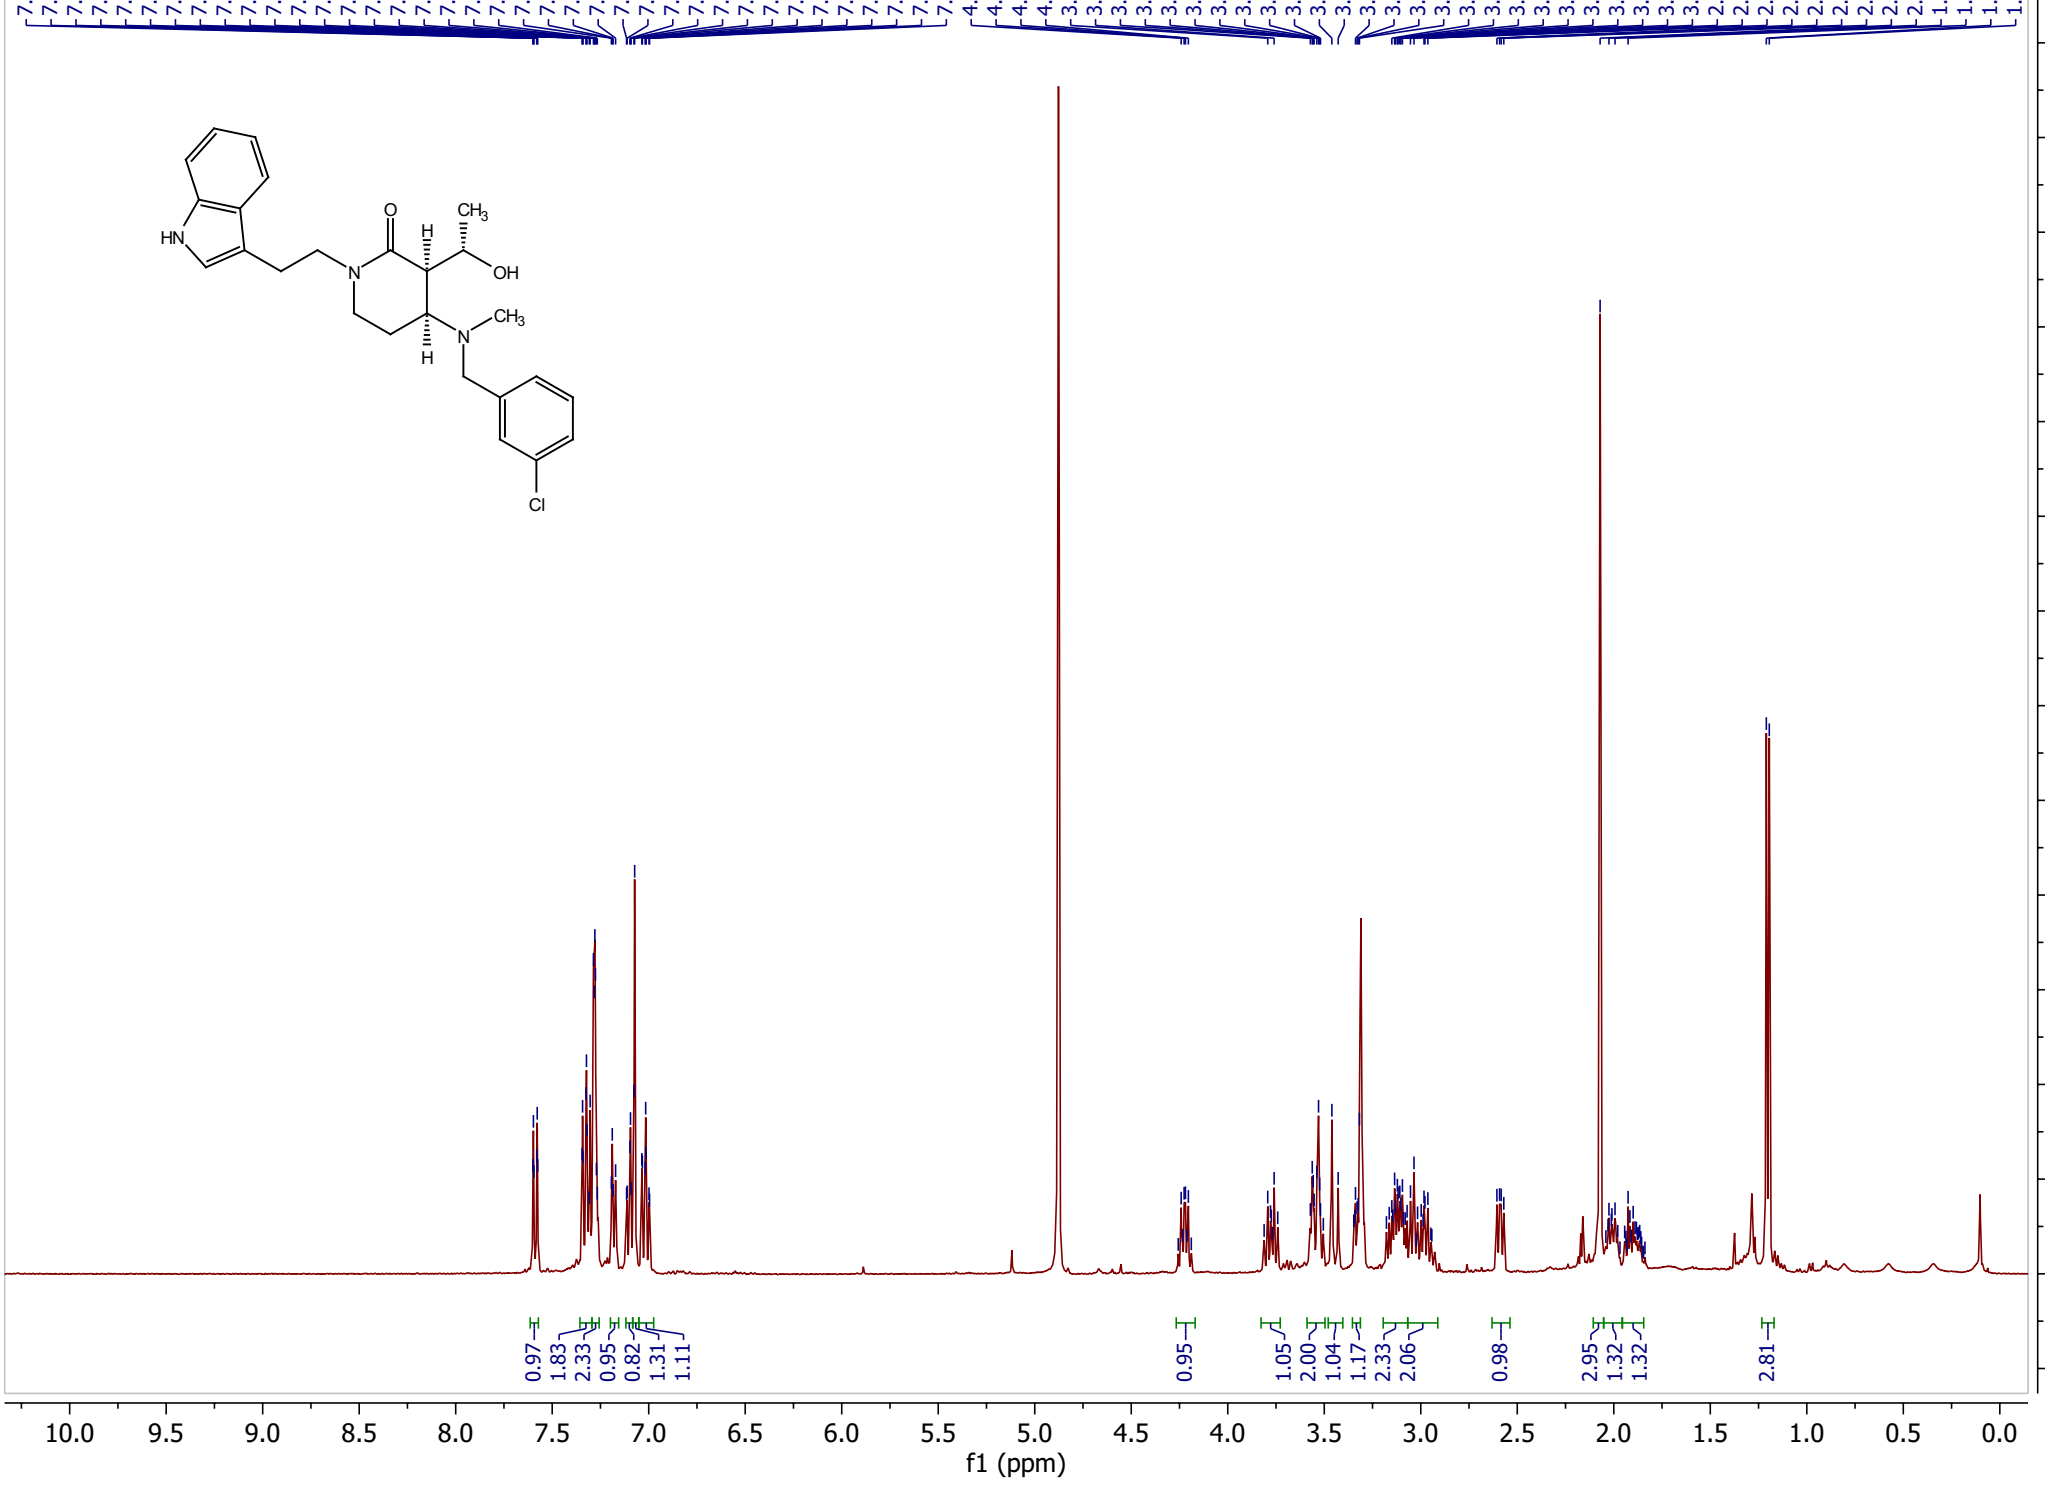

ARMV199car\_01

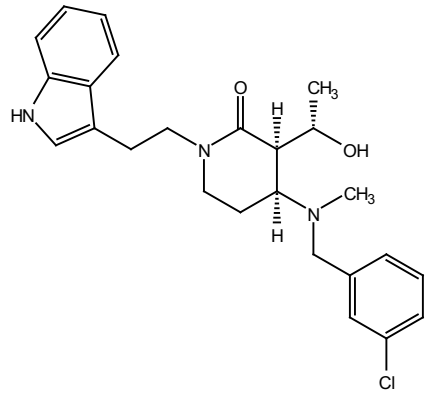

170.44

140.18

136.70

134.06

129.73

128.62

127.46

127.27

127.07

122.29

120.99

118.31

117.88

111.43

110.94

66.45

59.77

57.48

36.90

22.55

21.42

20.96

220 210 200 190 180 170 160 150 140 130 120 110 100 90 80 70 60 50 40 30 20 10 0 -10

f1 (ppm)

150  
140  
130  
120  
110  
100  
90  
80  
70  
60  
50  
40  
30  
20  
10  
0  
-10

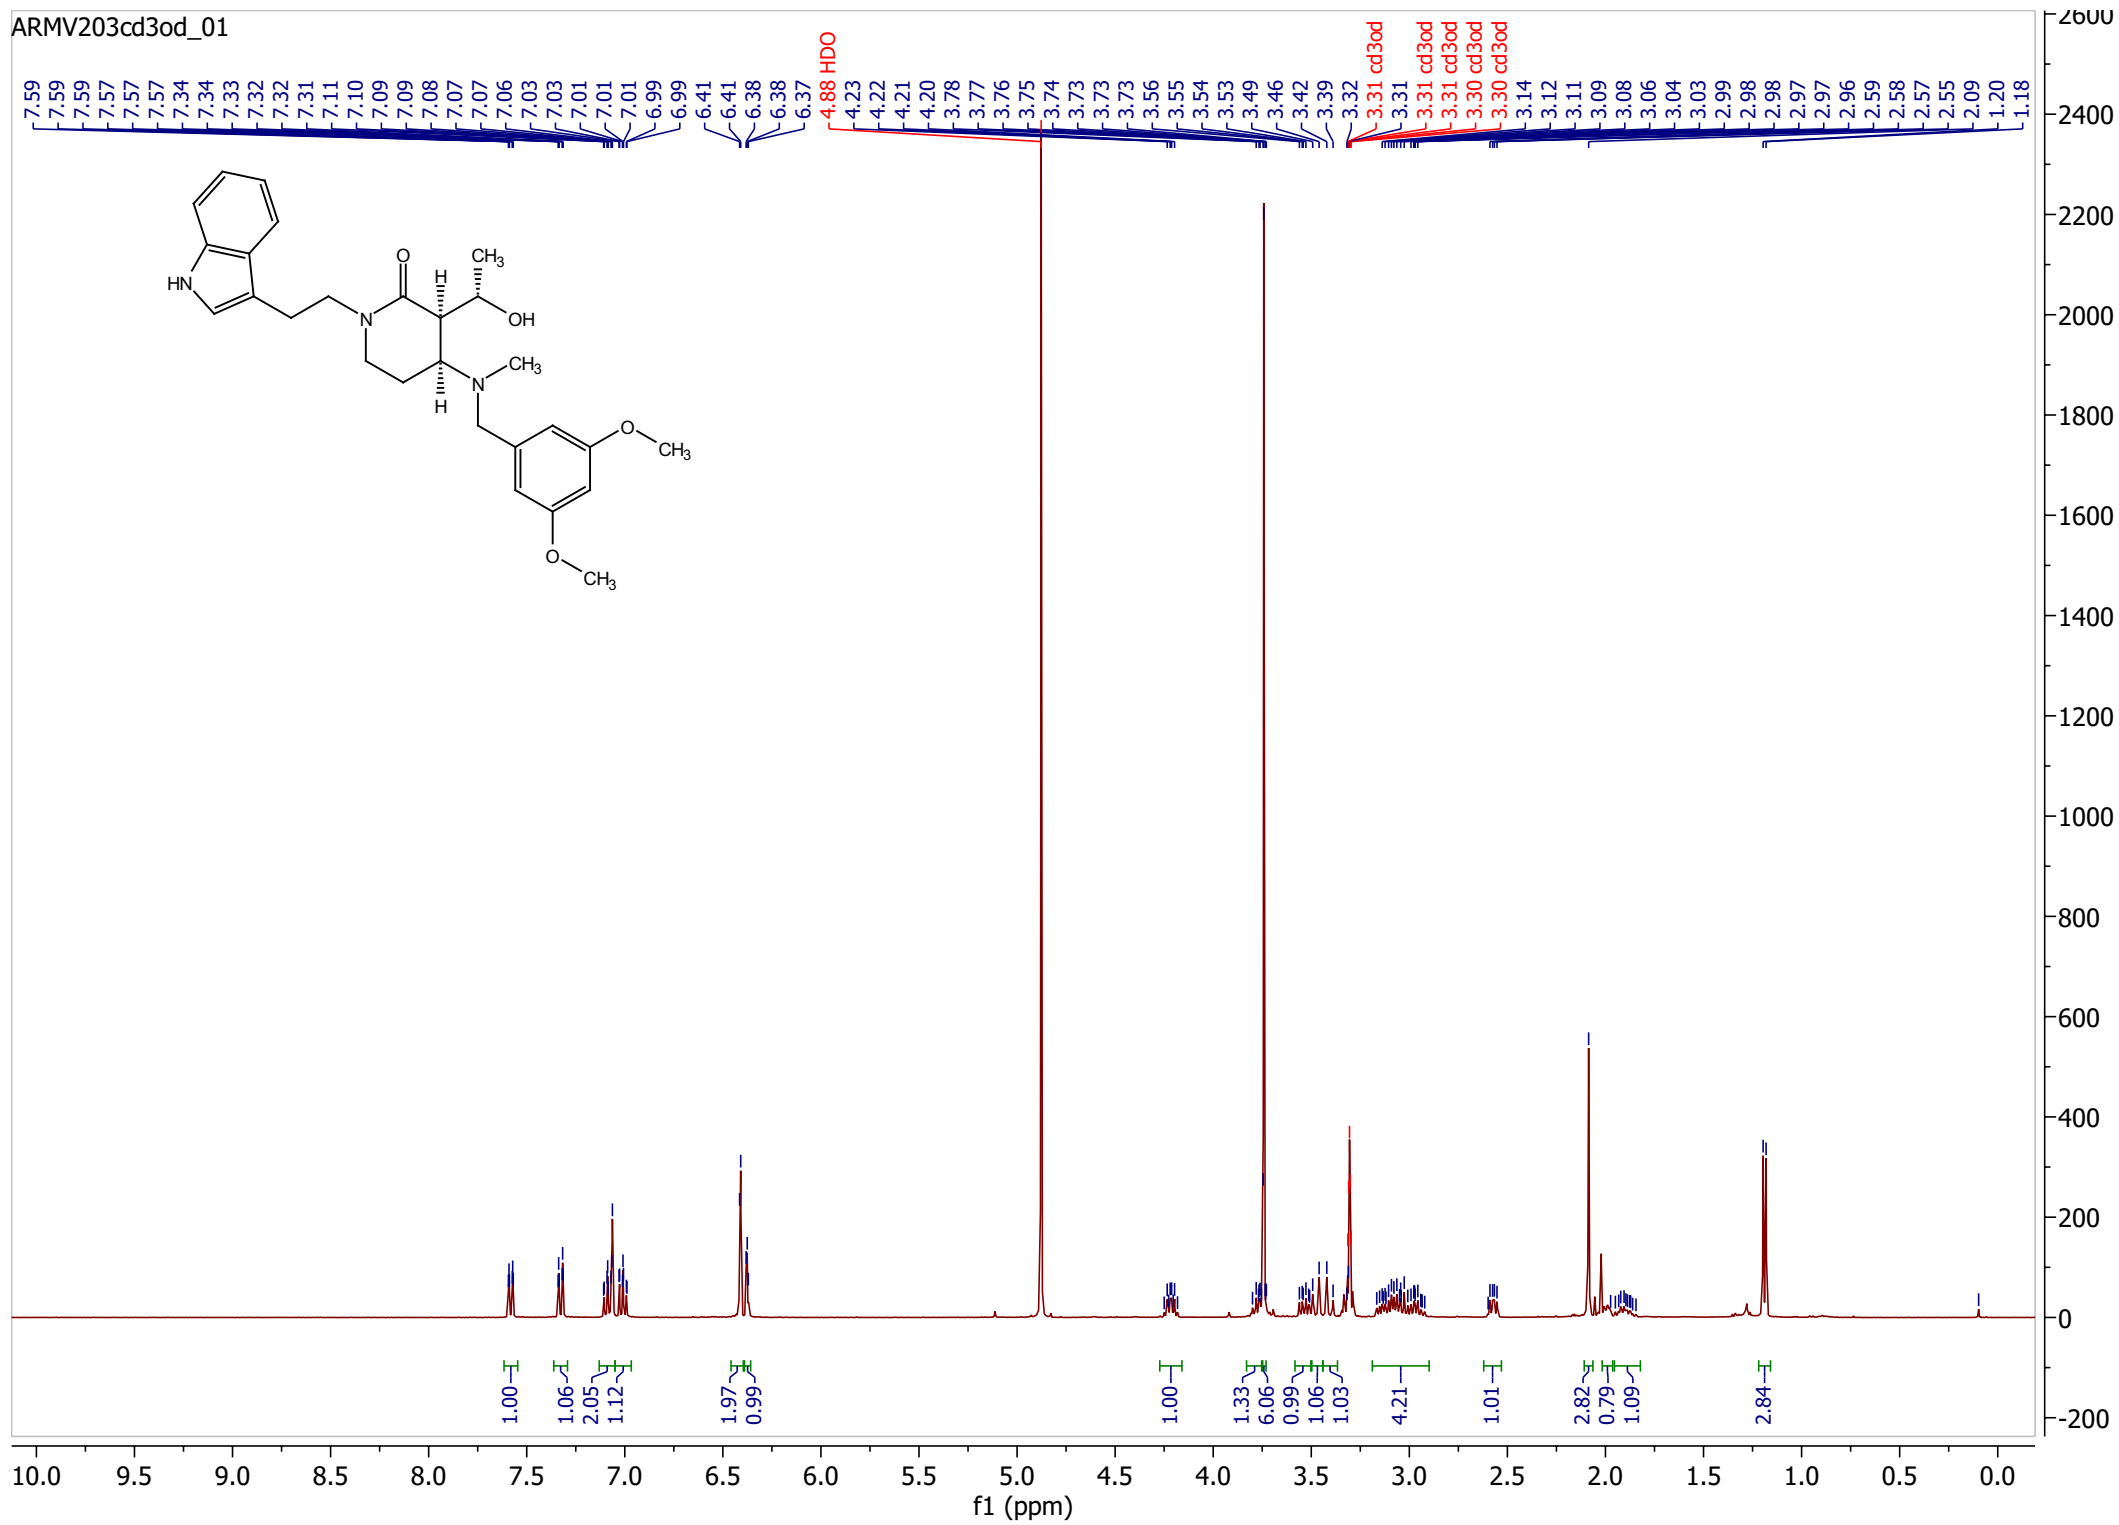

ARMV203cd3od\_02

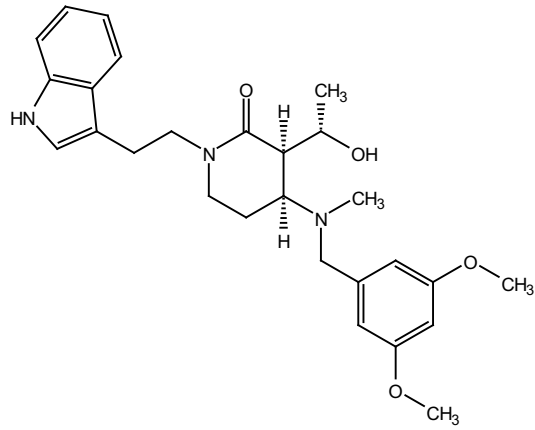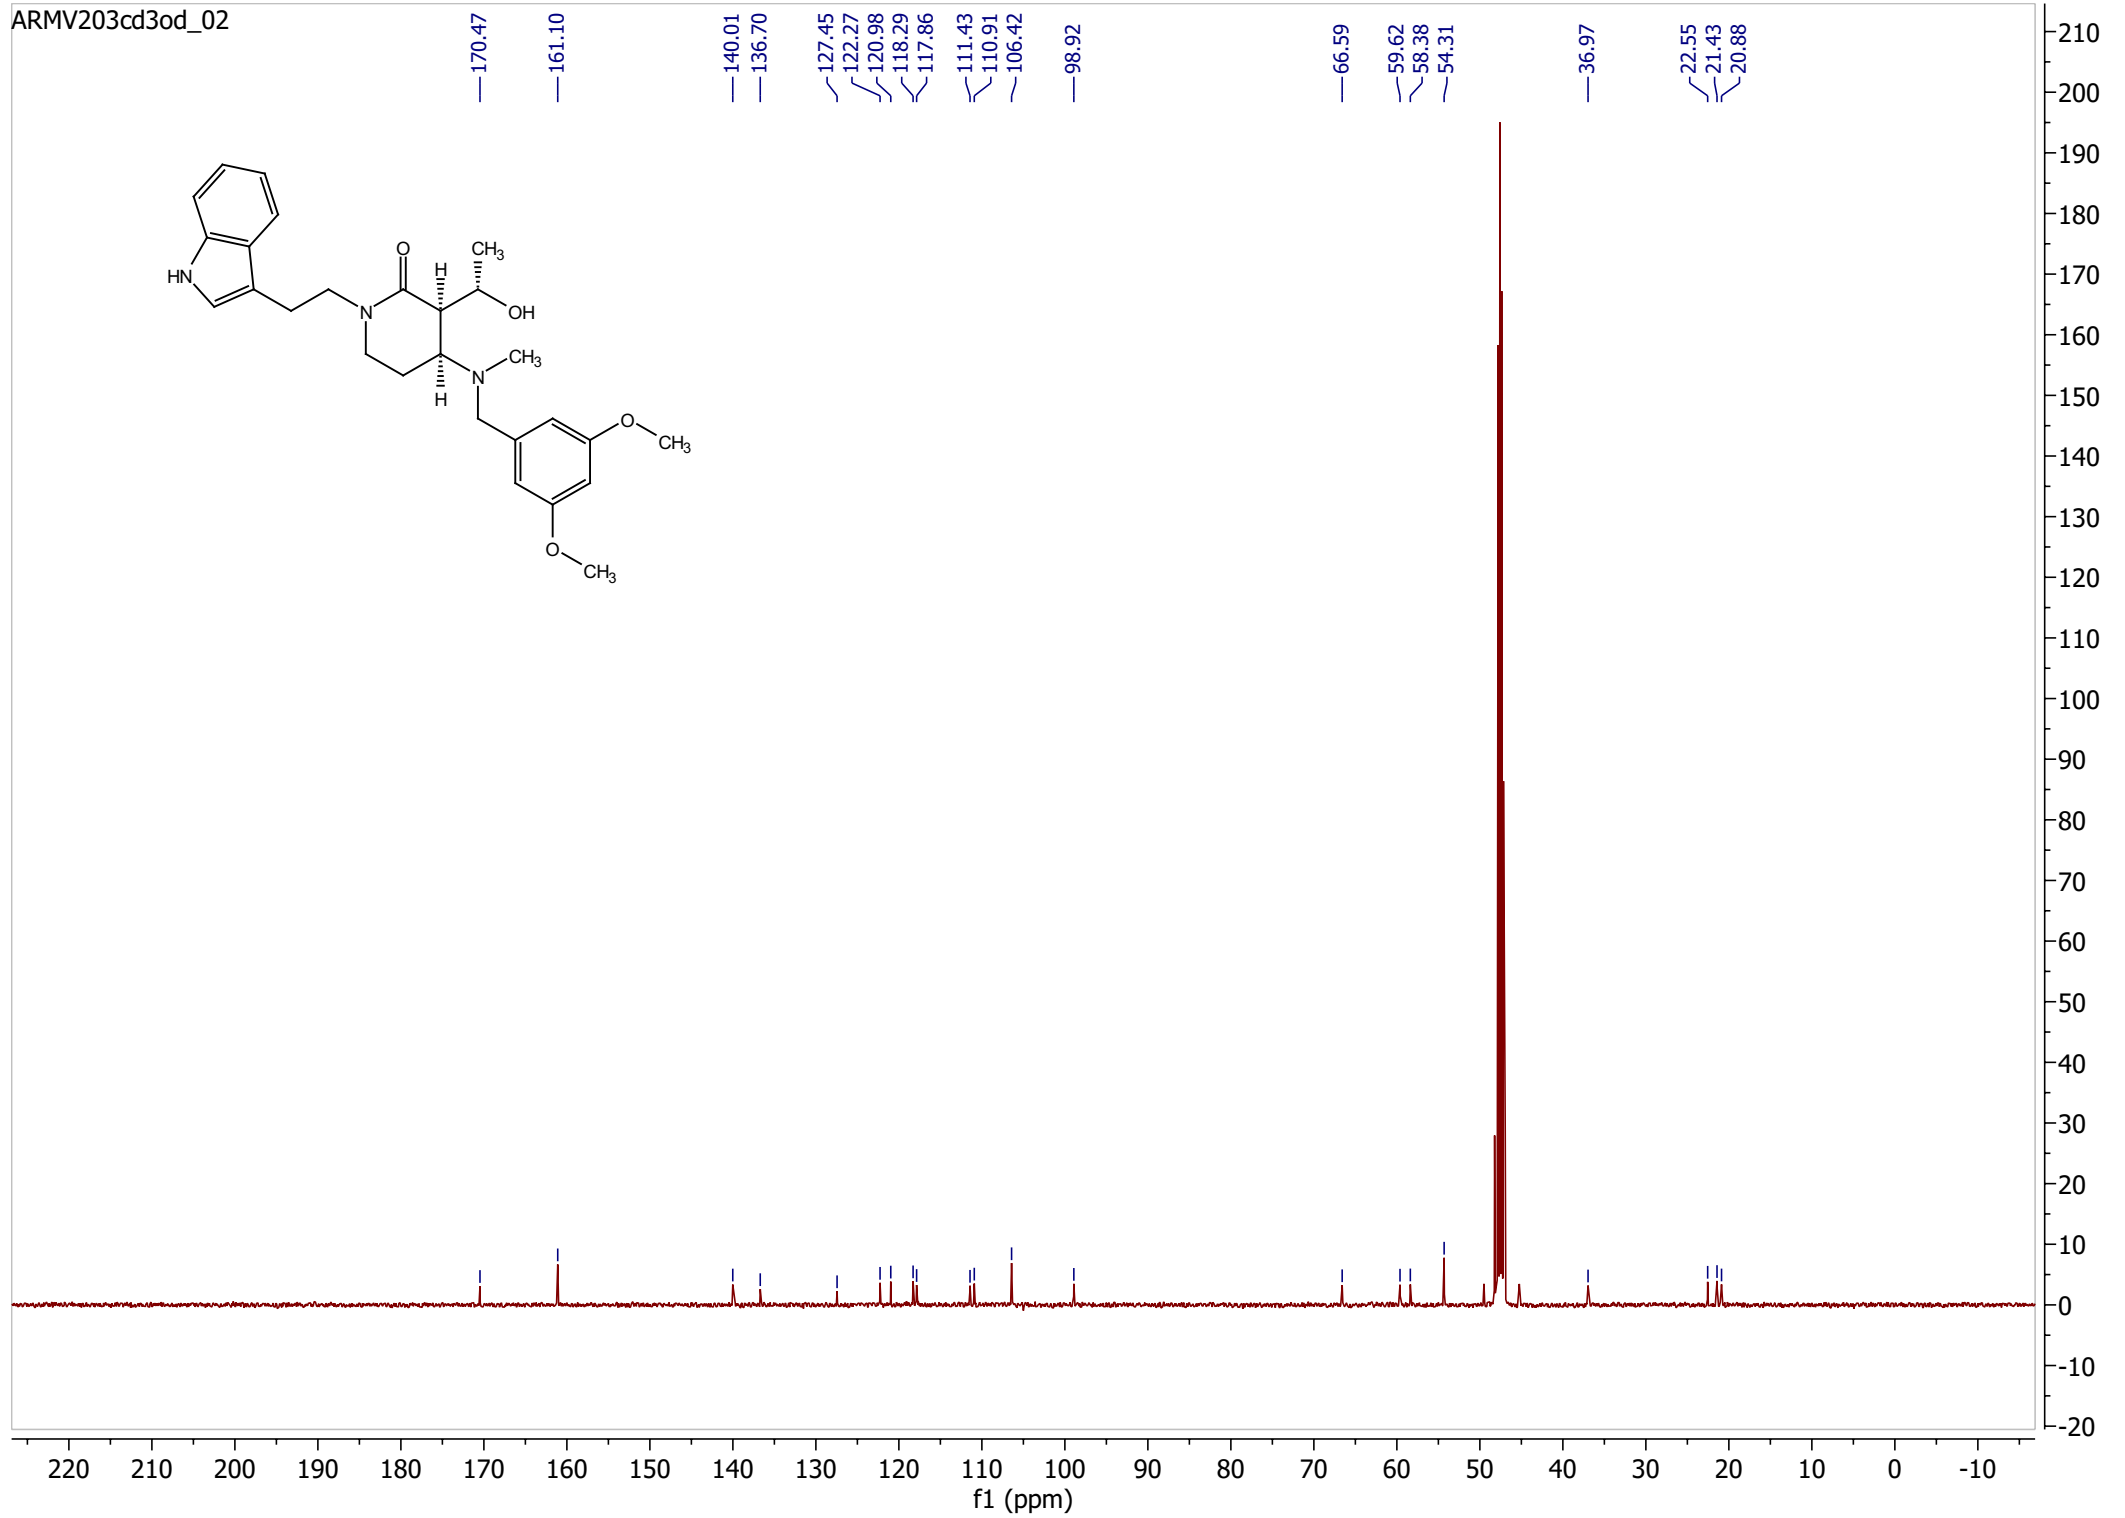



ARMV198  
STANDARD 1H OBSERV

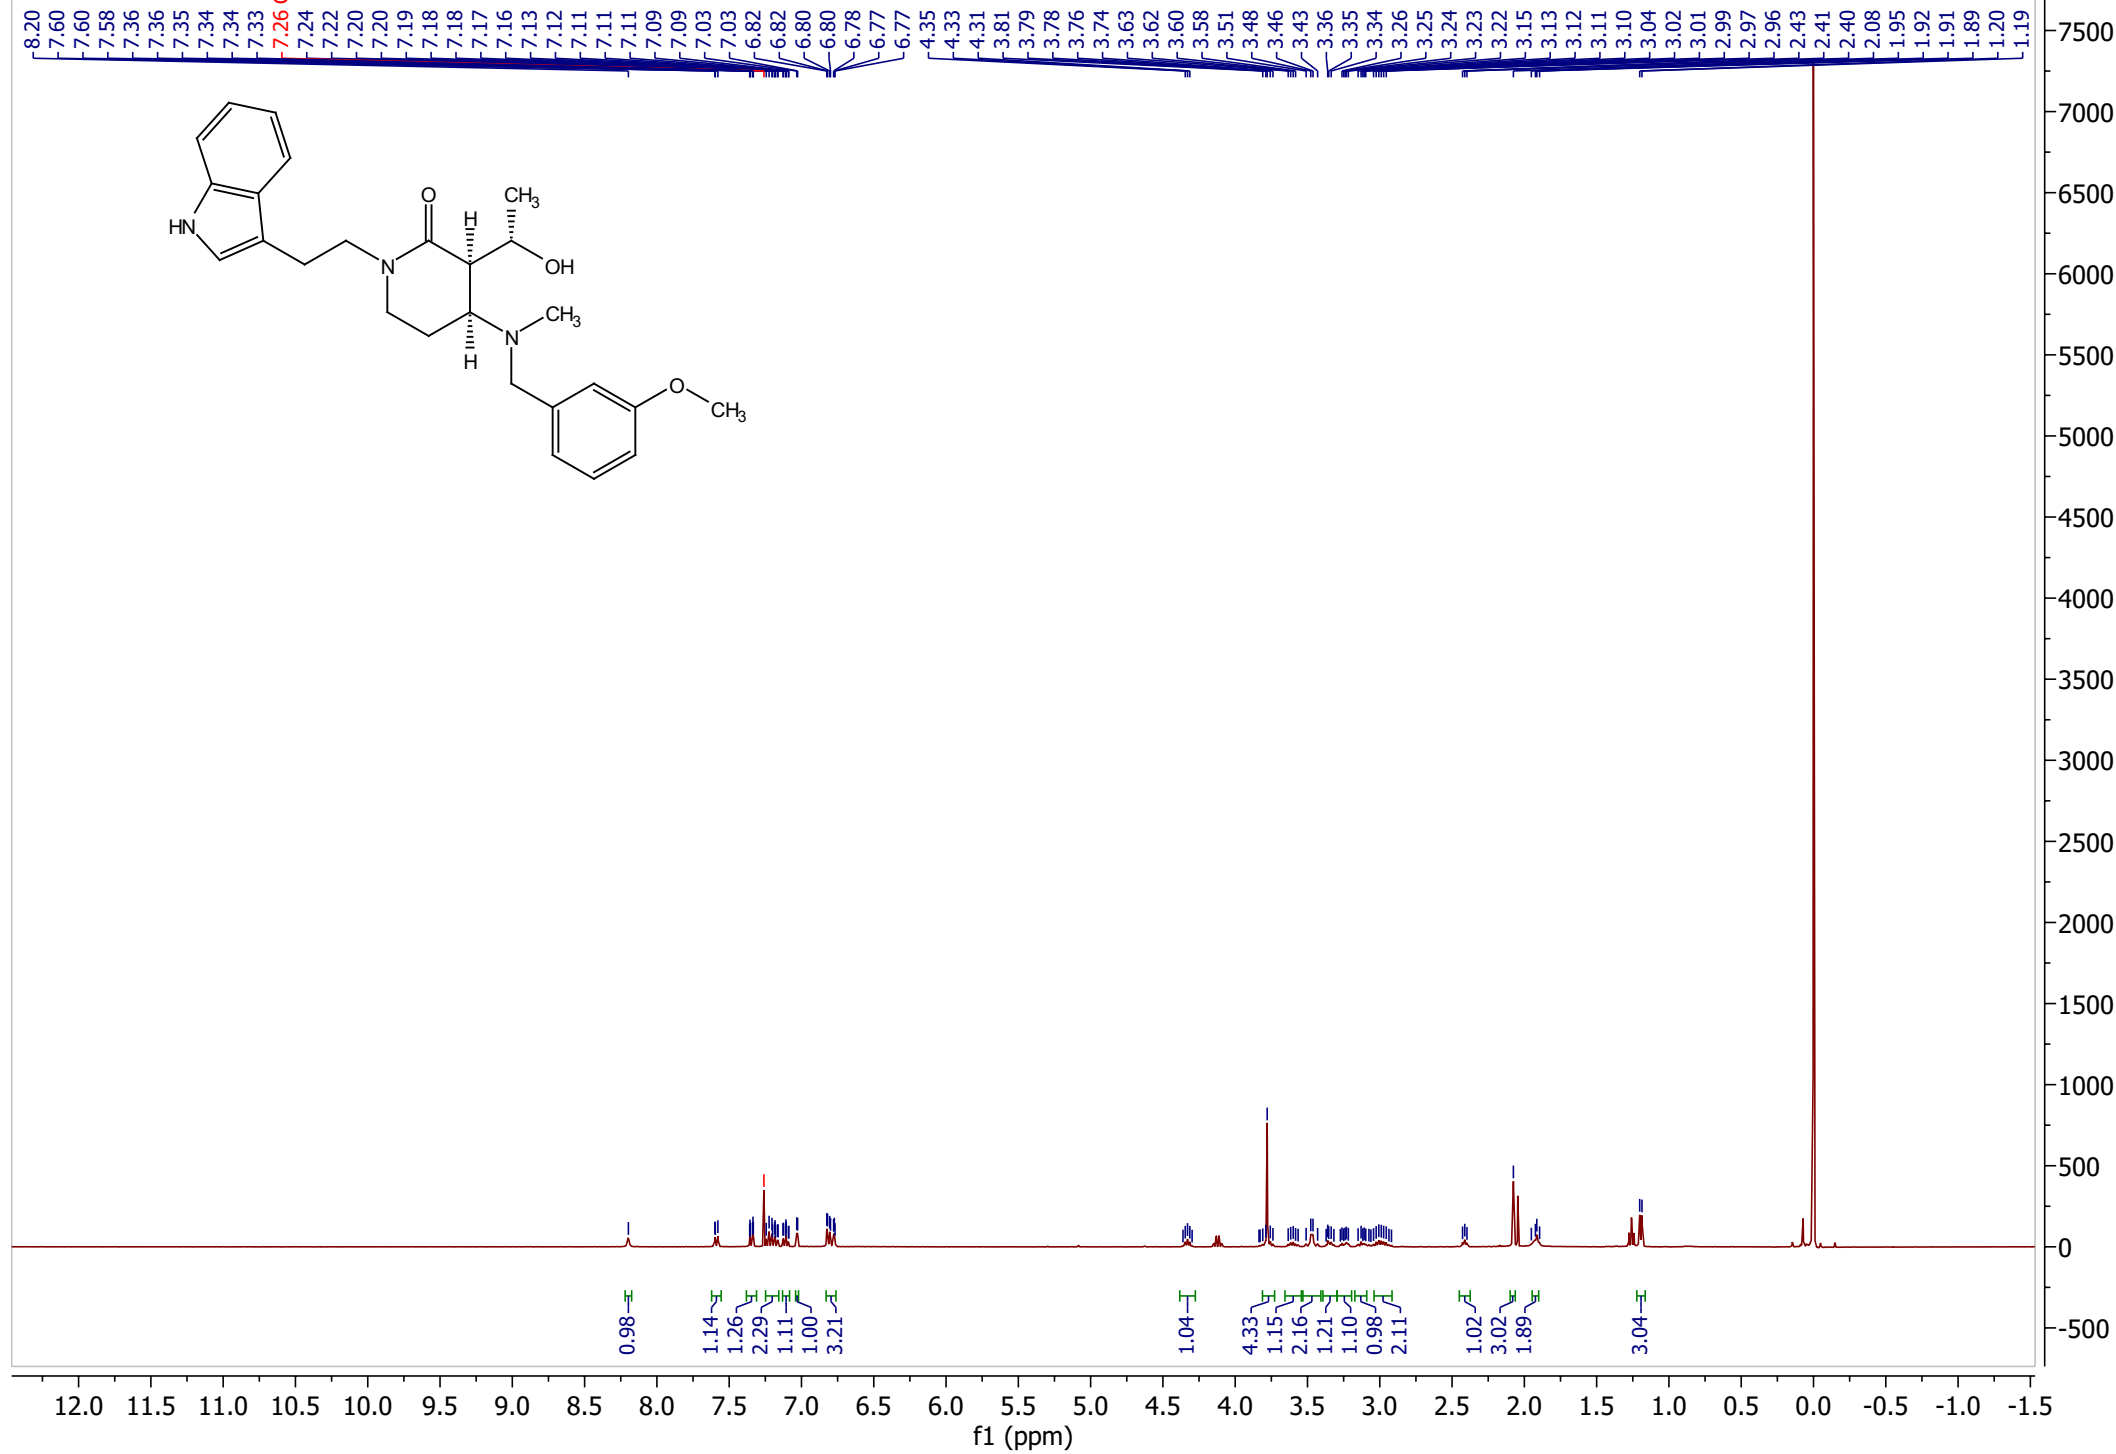

ARMV198carb\_01

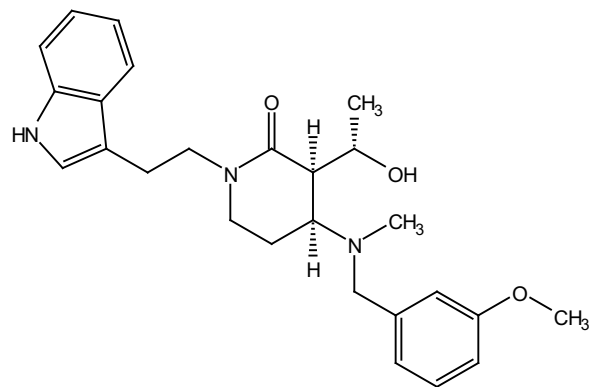

160.01

138.92

136.71

129.22

127.45

122.27

120.97

118.28

117.86

114.12

112.74

111.42

110.91

66.57

59.73

58.16

54.20

36.86

21.44

20.88

220 210 200 190 180 170 160 150 140 130 120 110 100 90 80 70 60 50 40 30 20 10 0 -10

f1 (ppm)

250  
240  
230  
220  
210  
200  
190  
180  
170  
160  
150  
140  
130  
120  
110  
100  
90  
80  
70  
60  
50  
40  
30  
20  
10  
0  
-10  
-20

ARMV184

STANDARD 1H OBSERVE

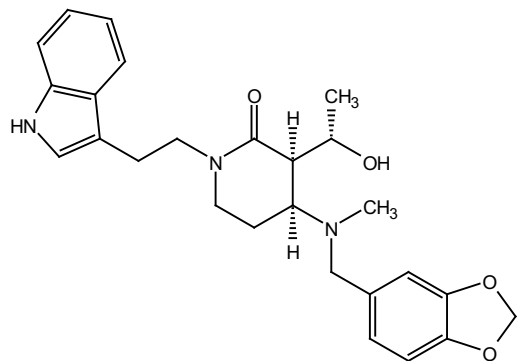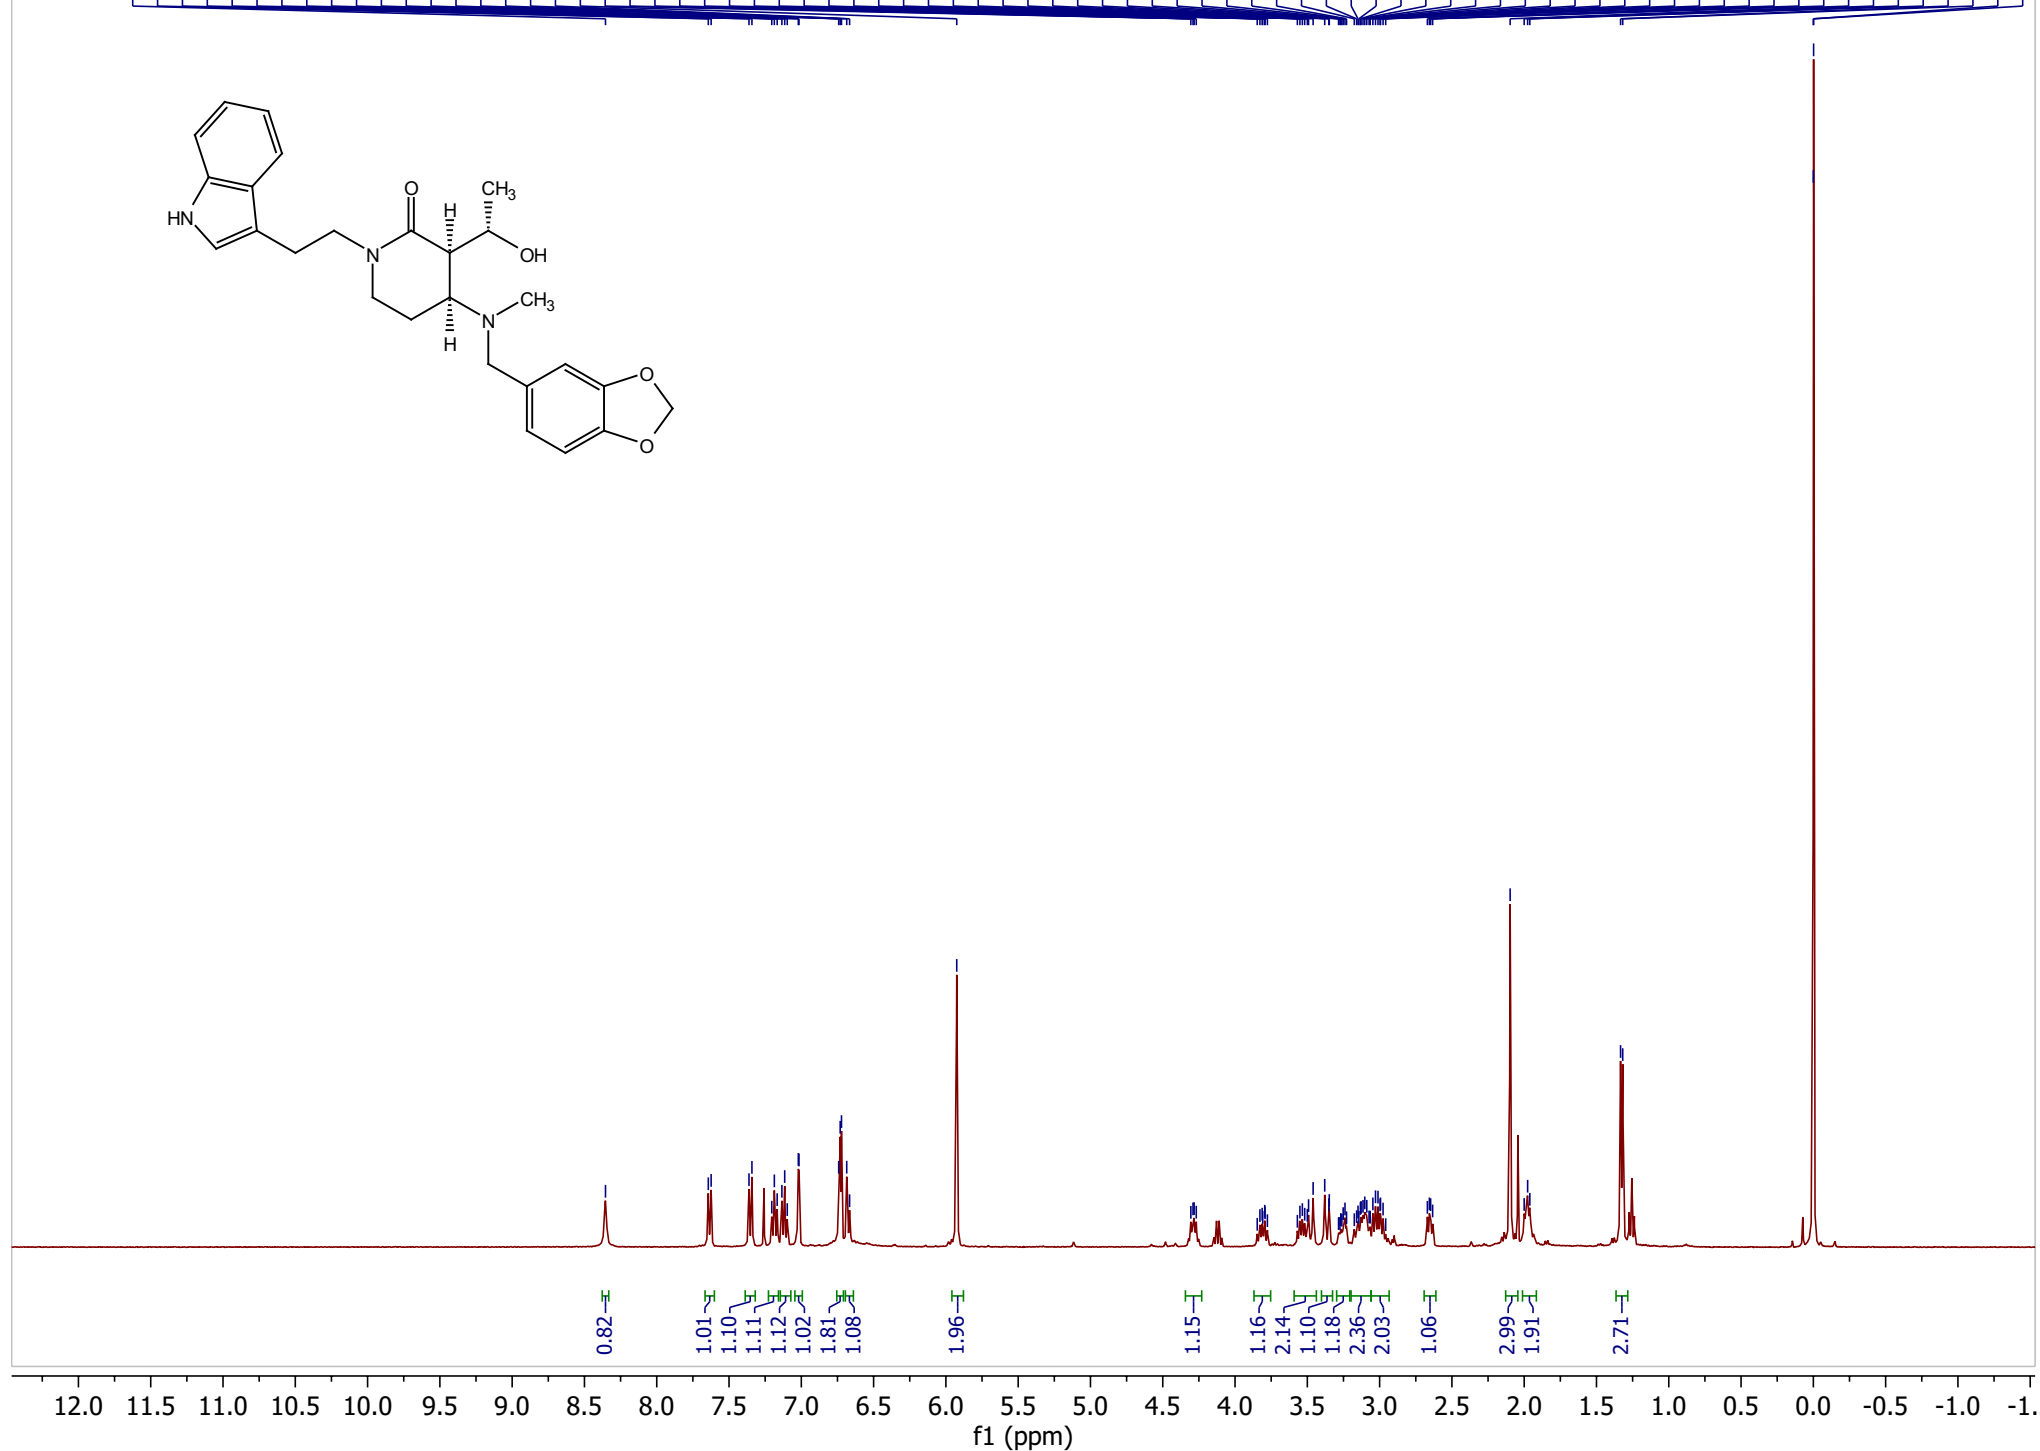

ARMV184\_01

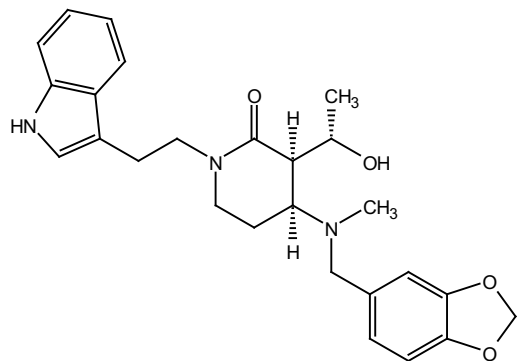

169.97  
147.87  
146.99  
136.29  
131.09  
127.41  
122.32  
122.13  
122.01  
119.34  
118.59  
112.73  
111.29  
109.29  
108.22  
101.04

66.69  
59.70  
58.51  
50.04  
47.52  
45.52  
37.92  
23.20  
22.70  
21.51

0.00

220 210 200 190 180 170 160 150 140 130 120 110 100 90 80 70 60 50 40 30 20 10 0 -10  
f1 (ppm)

100  
90  
80  
70  
60  
50  
40  
30  
20  
10  
0  
-10

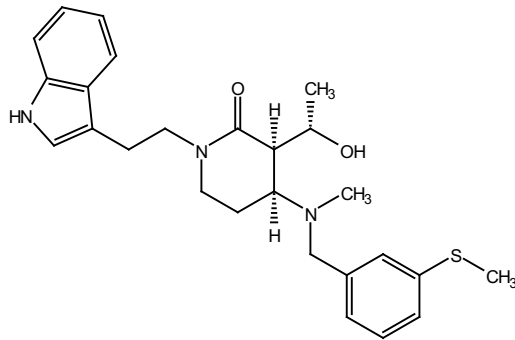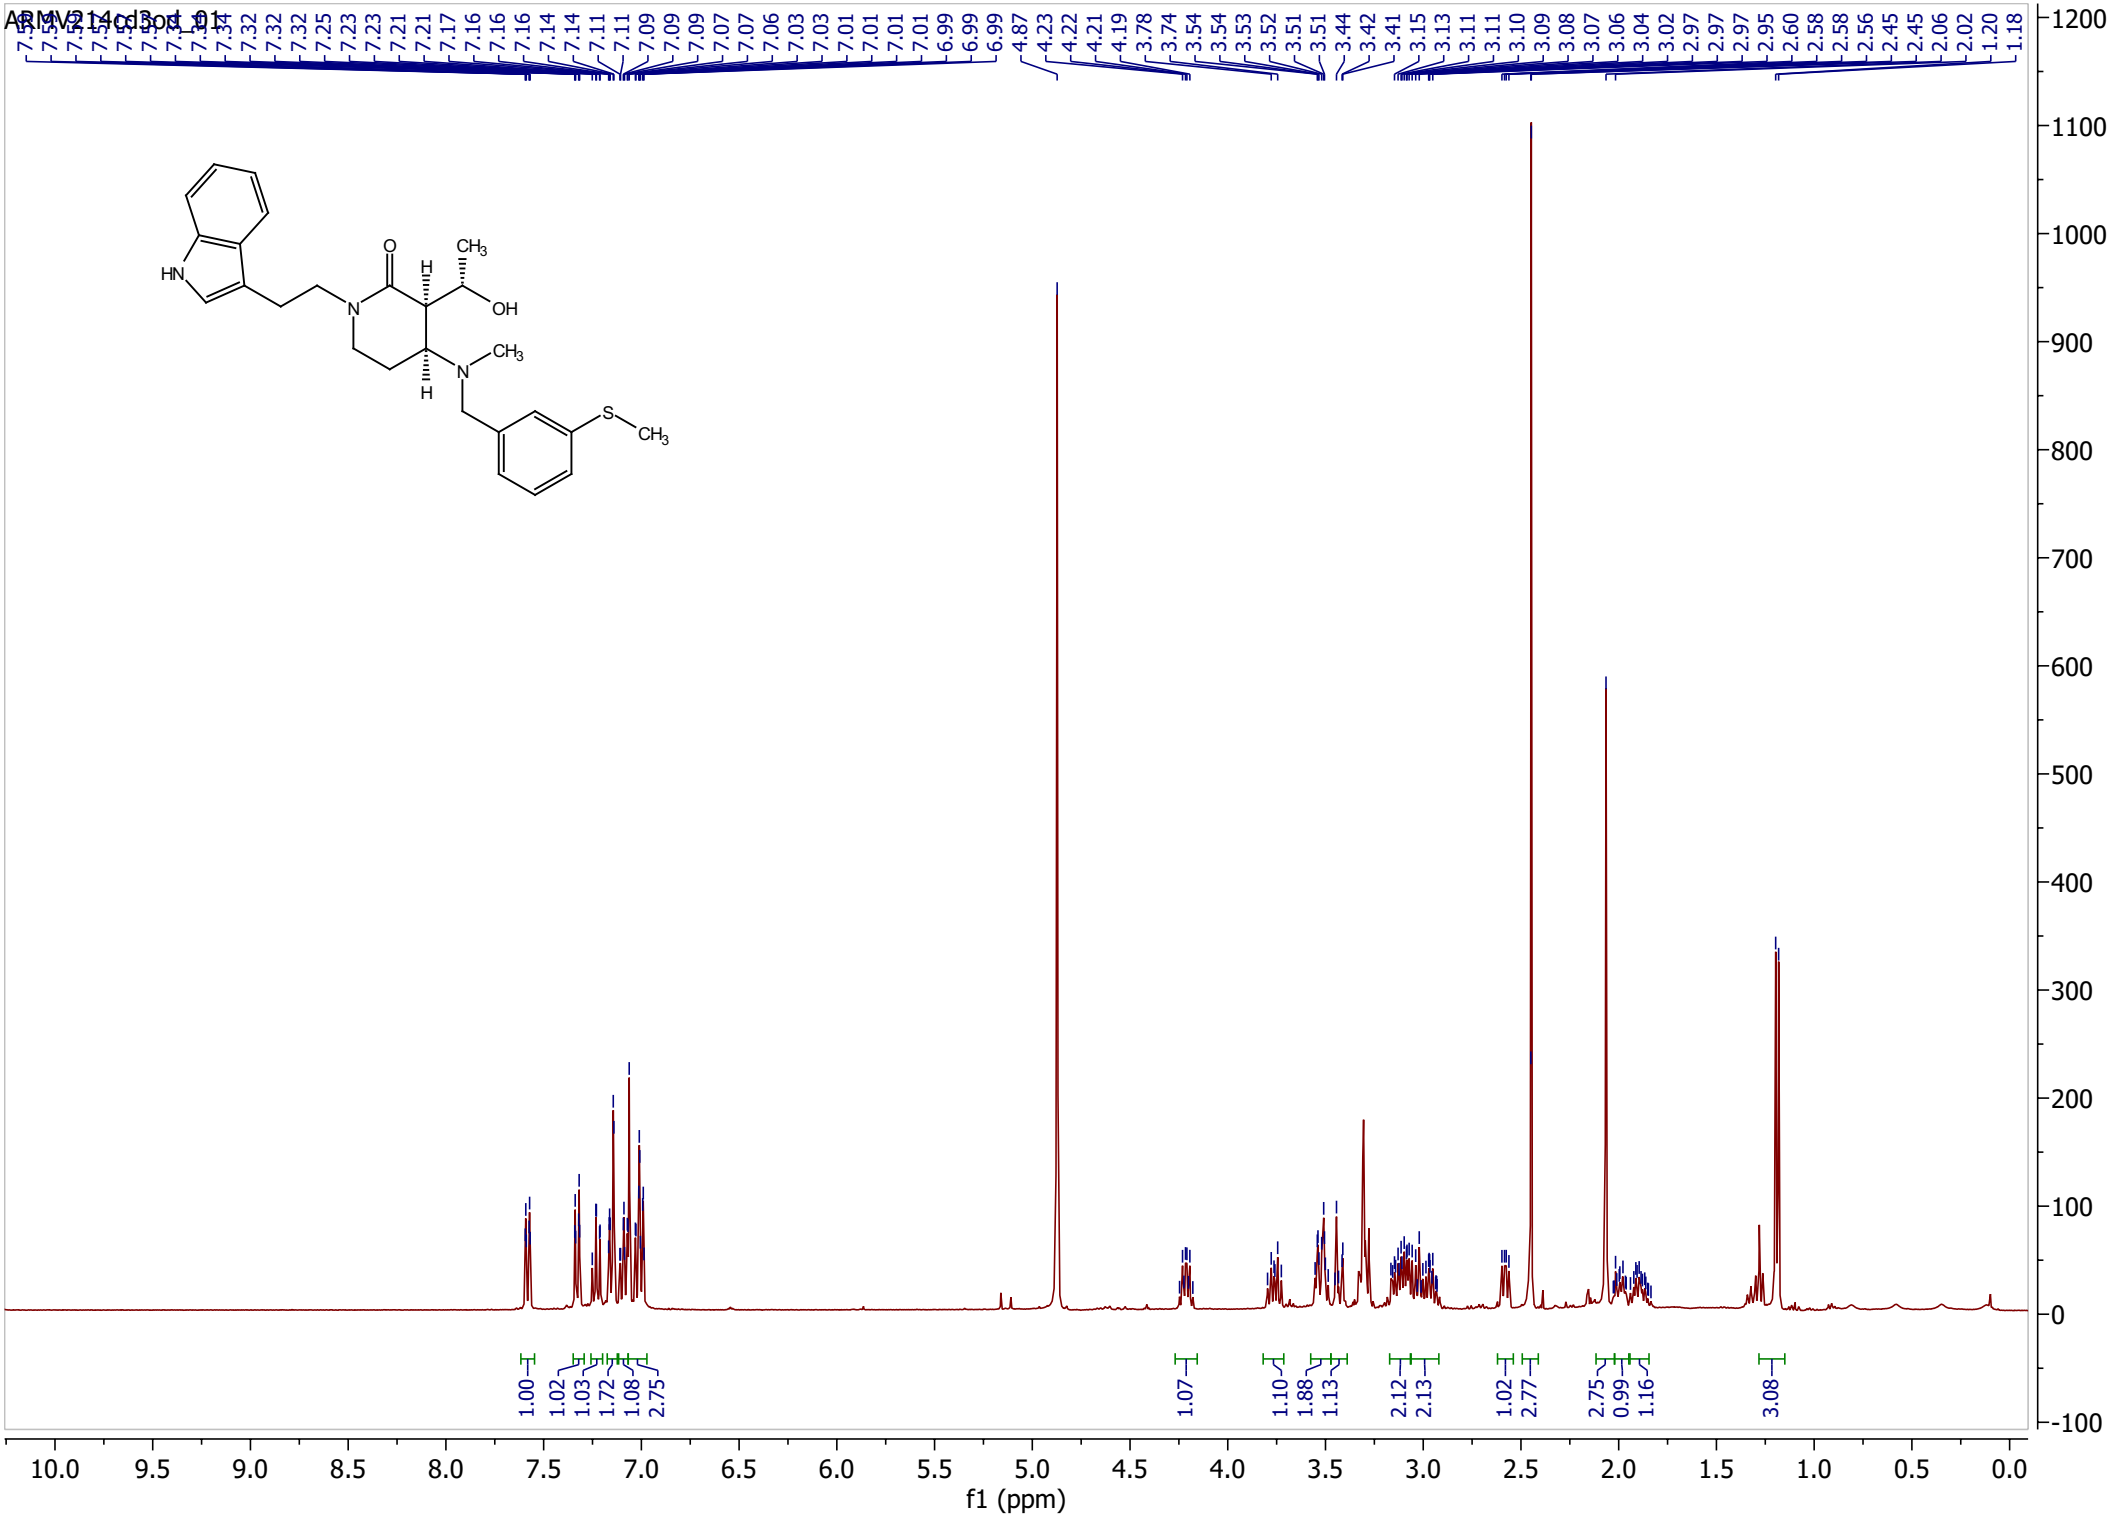

ARMV214carb\_01

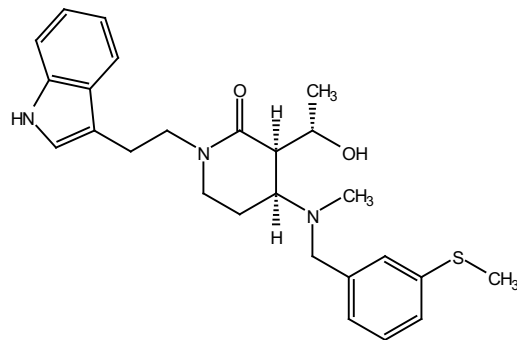

170.39

139.23

138.35

136.70

128.65

127.46

126.38

125.27

122.29

121.01

118.32

117.89

111.43

110.94

66.55

59.74

57.97

36.86

22.55

21.46

20.91

14.12

220 210 200 190 180 170 160 150 140 130 120 110 100 90 80 70 60 50 40 30 20 10 0 -10

f1 (ppm)

150  
140  
130  
120  
110  
100  
90  
80  
70  
60  
50  
40  
30  
20  
10  
0  
-10

ARMV175D\_01

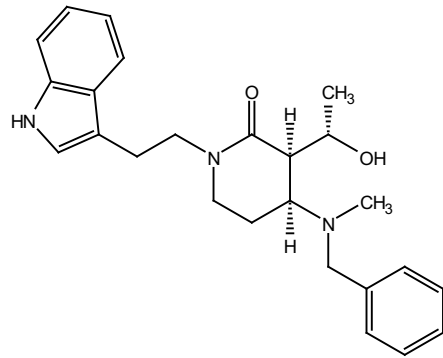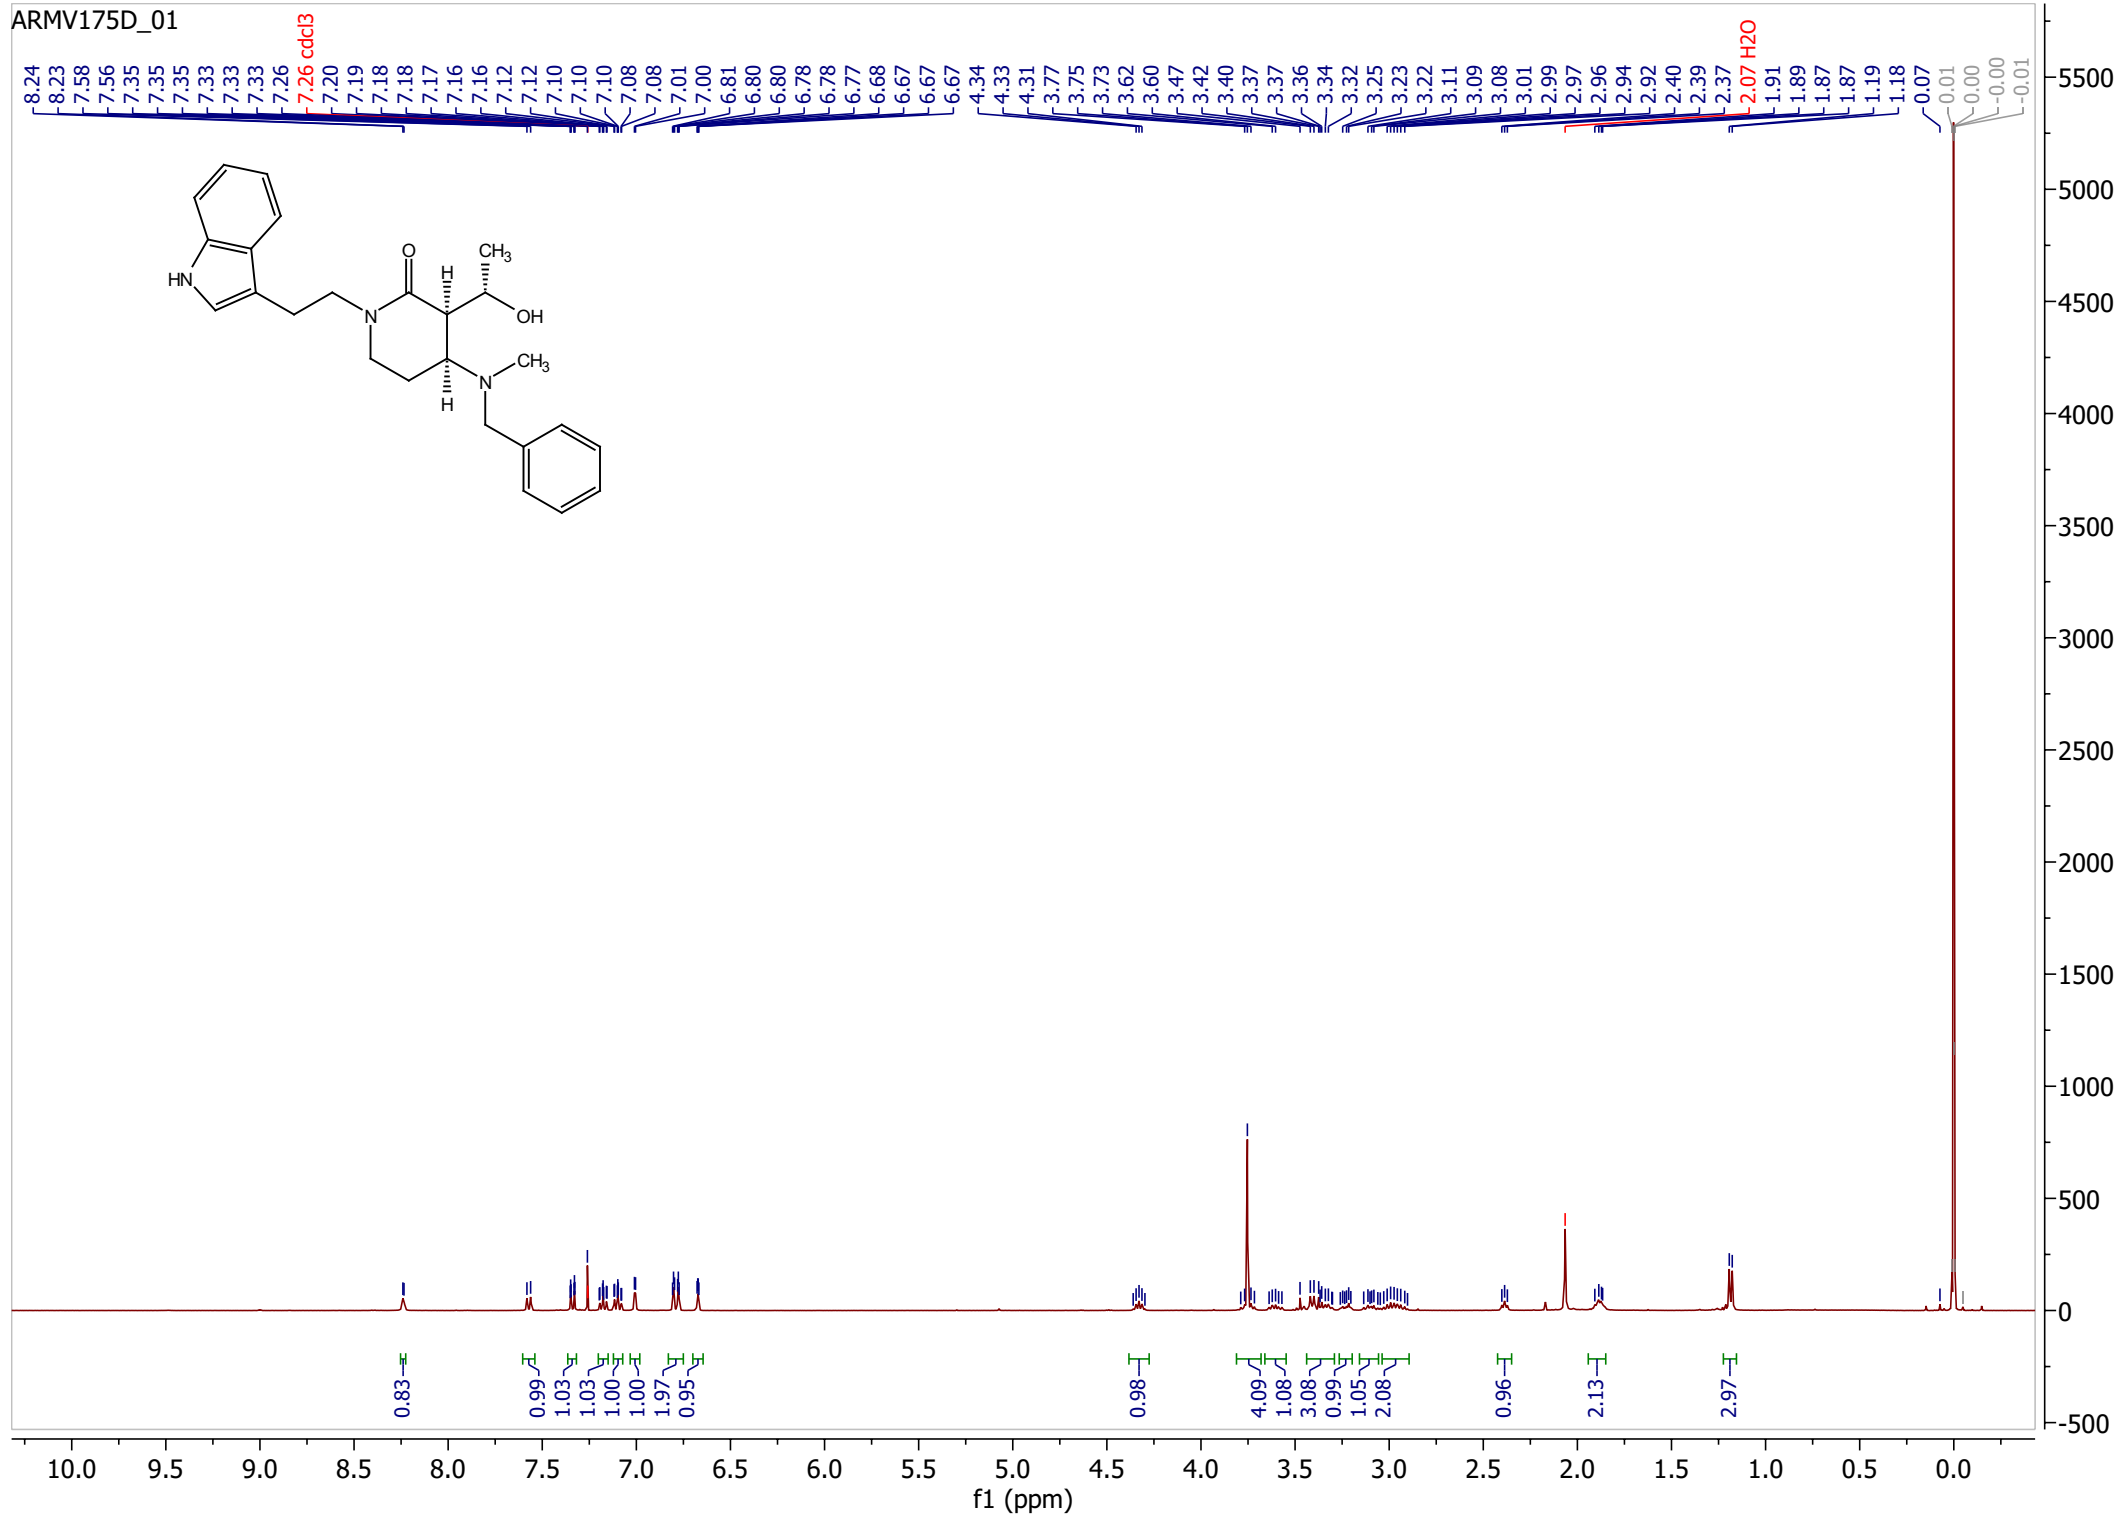

ARMV175D\_01 1

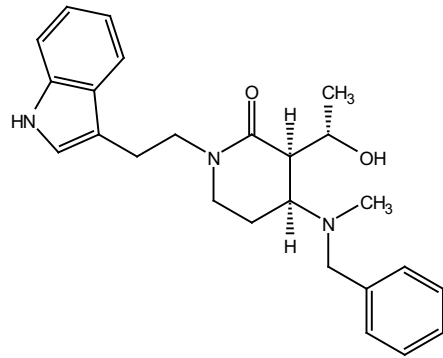

170.97

160.48

139.65

136.24

135.04

127.31

122.30

122.07

121.40

119.36

118.43

113.65

113.44

112.38

111.45

66.31

59.05

57.97

55.56

48.46

47.43

45.04

37.54

23.13

22.08

20.48

220 210 200 190 180 170 160 150 140 130 120 110 100 90 80 70 60 50 40 30 20 10 0 -10

f1 (ppm)

110 100 90 80 70 60 50 40 30 20 10 0 -10



PROTON\_01  
ARMVII143crude

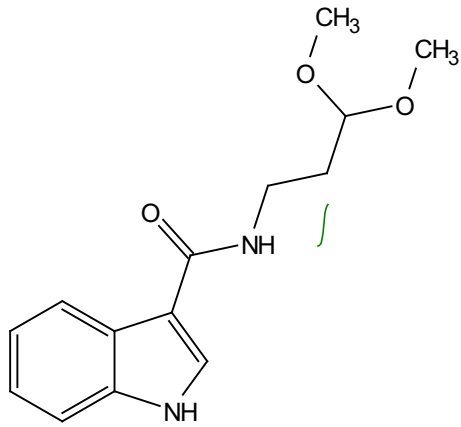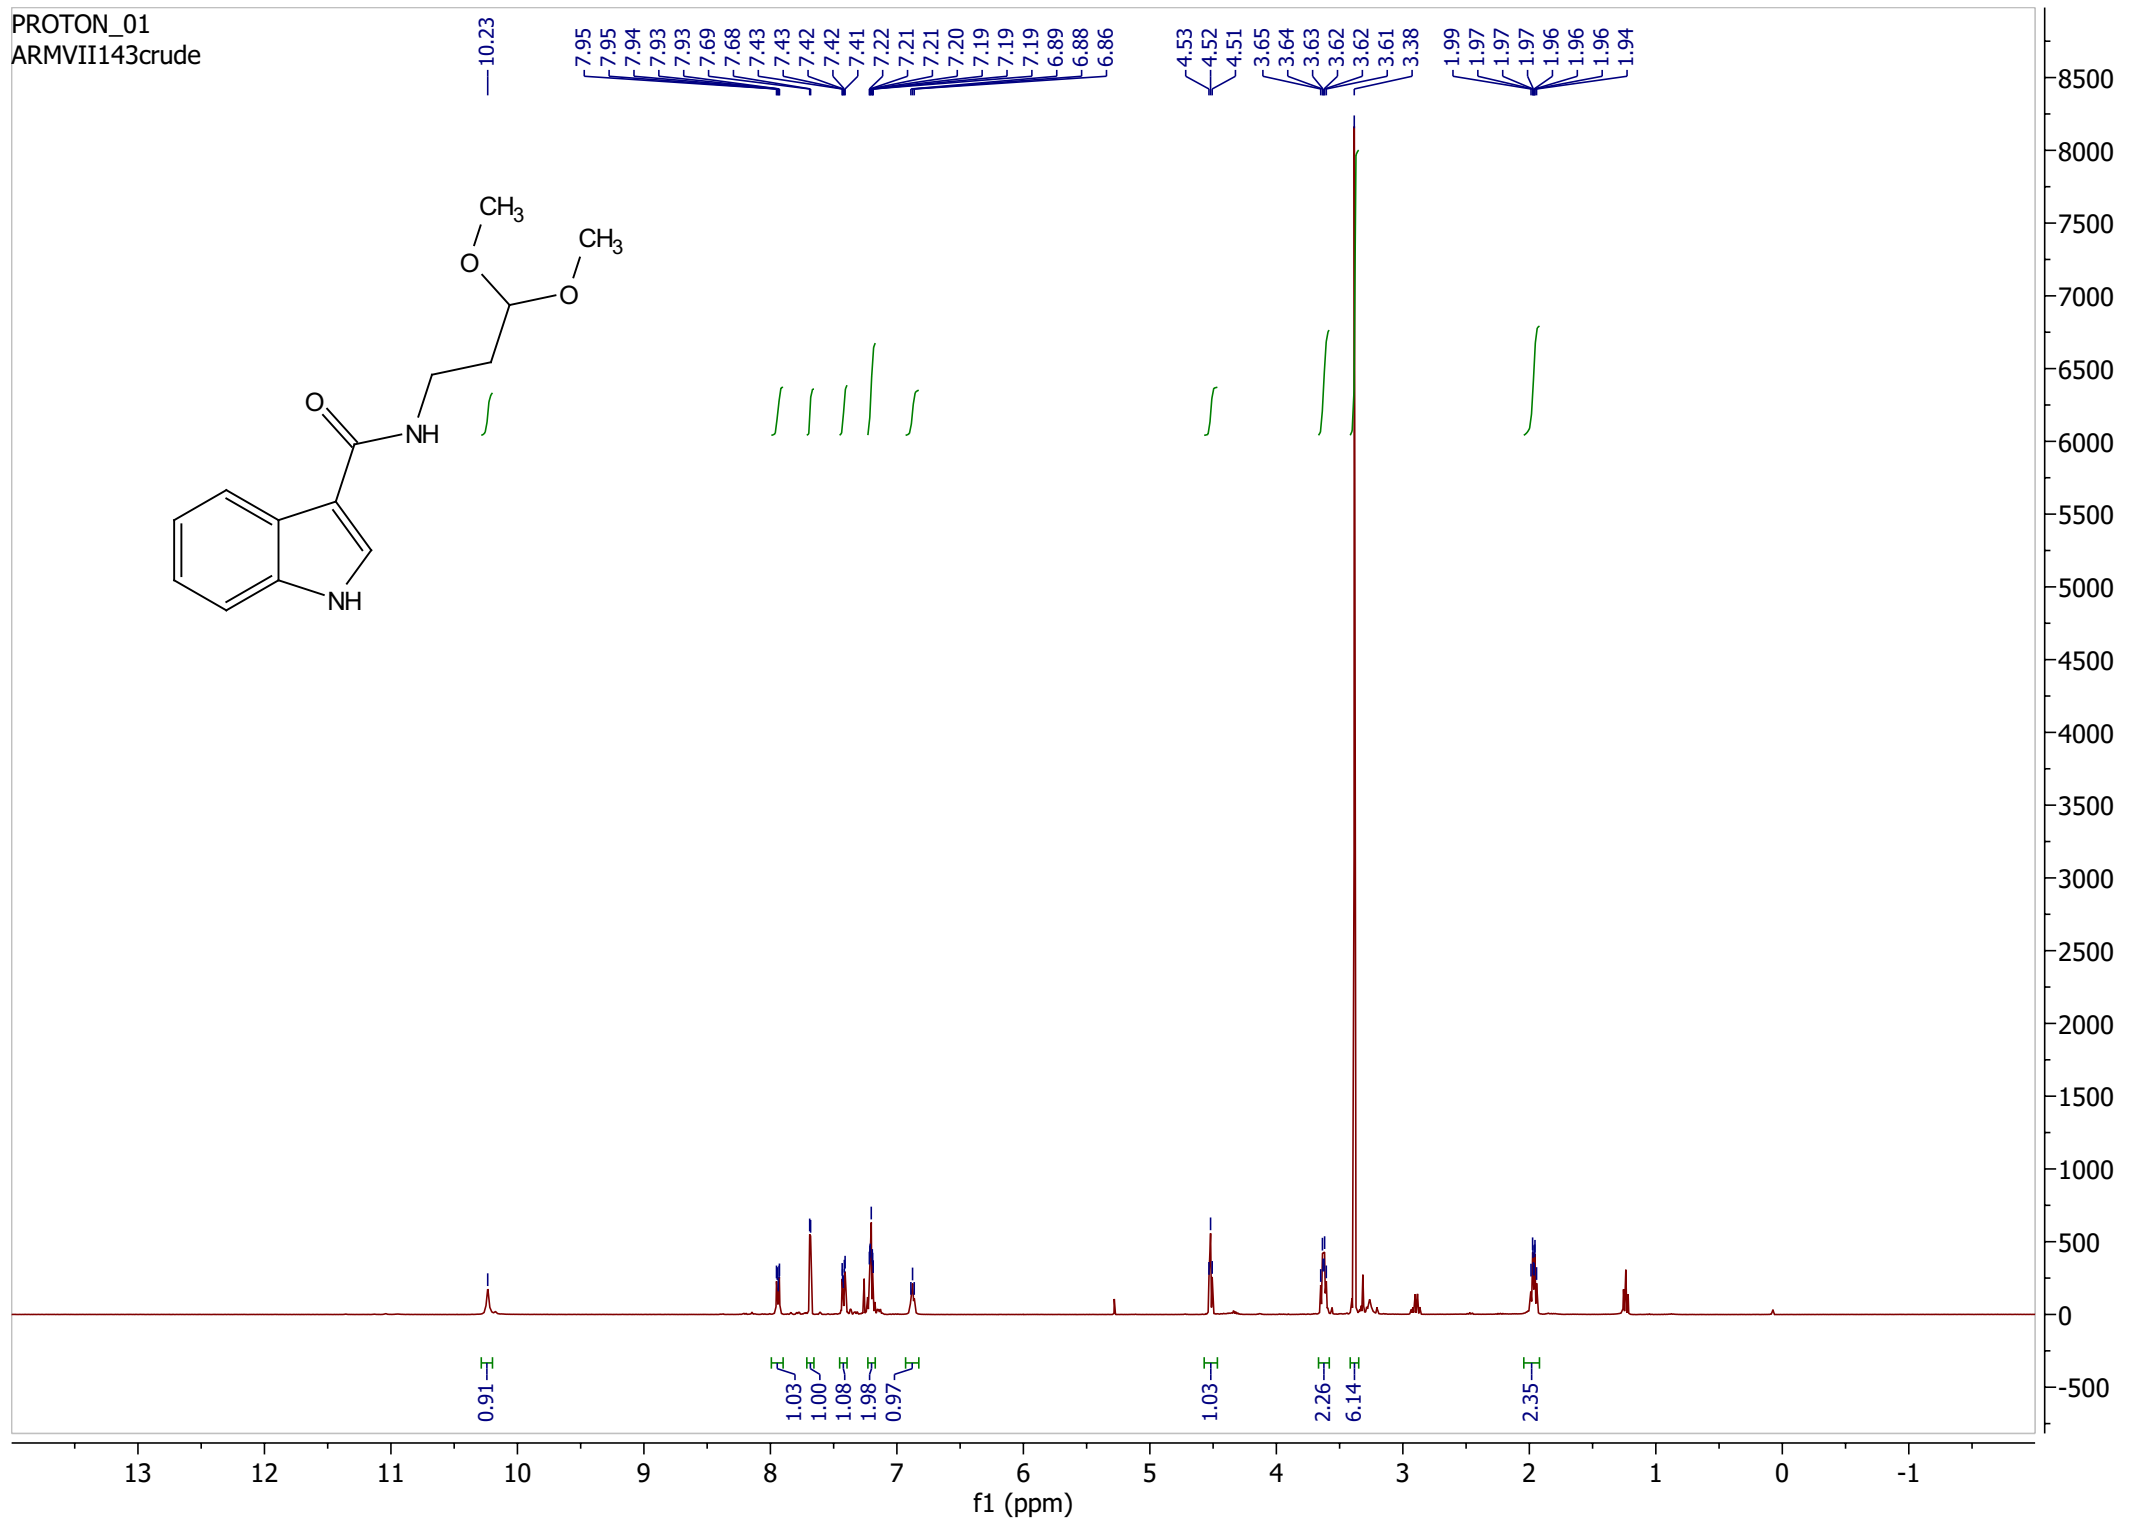

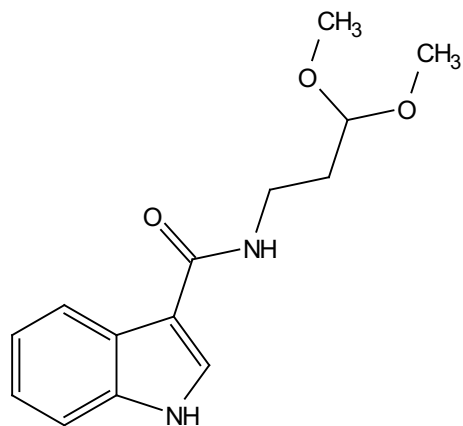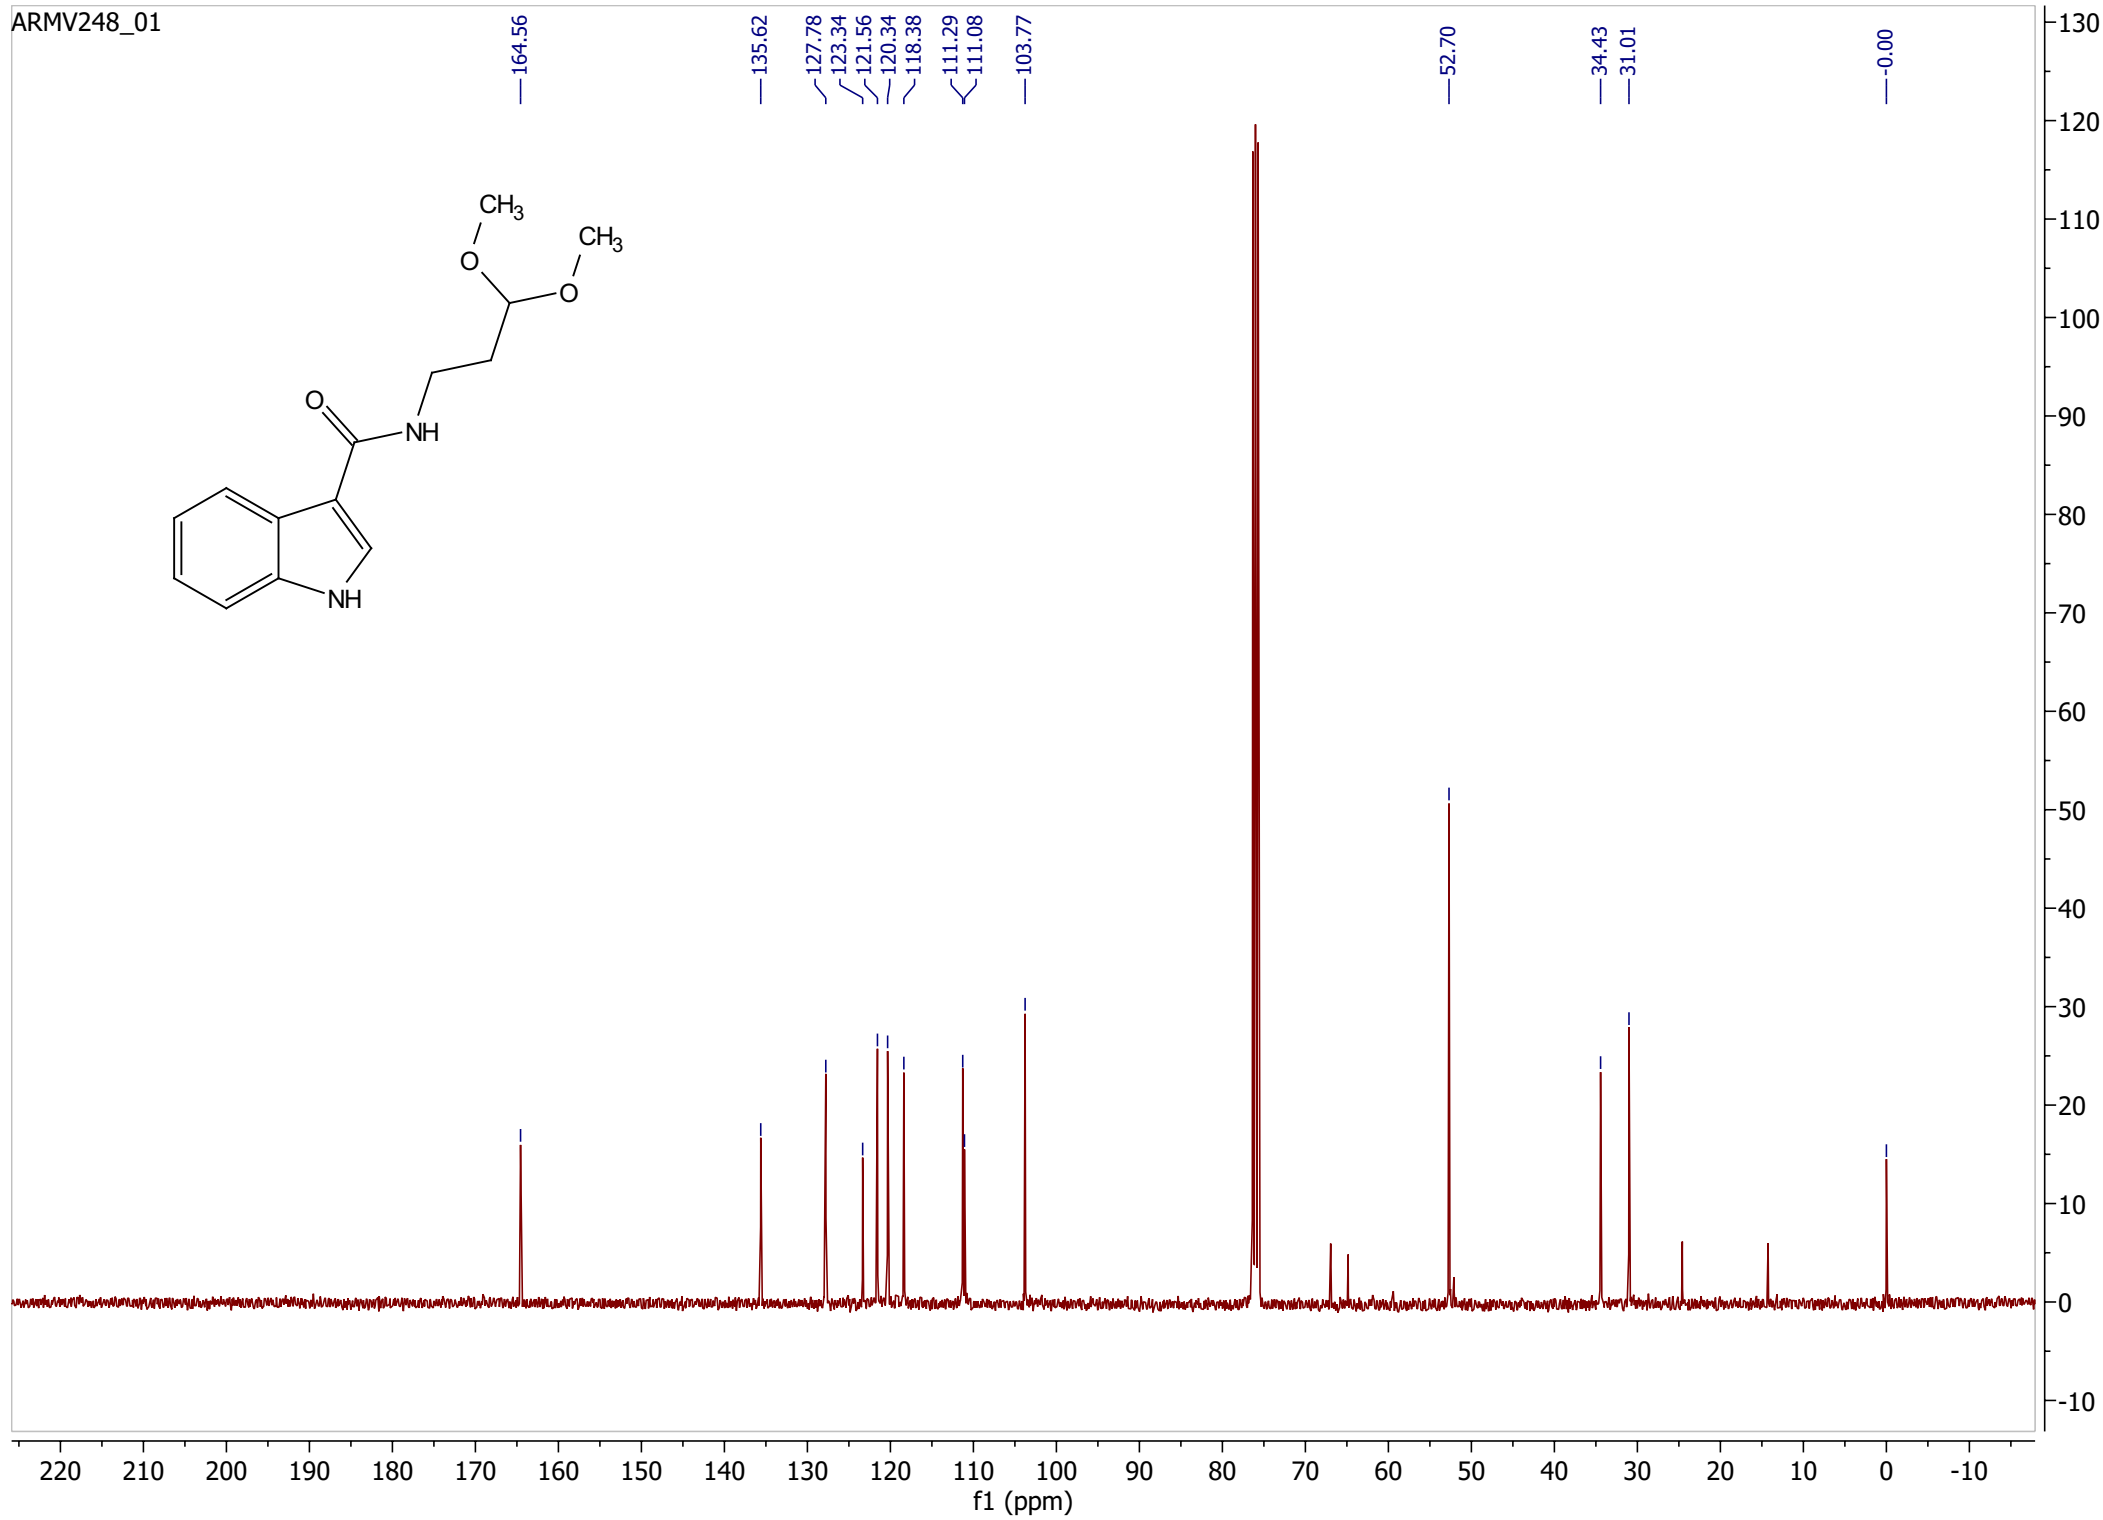

PROTON\_01  
ARMVII111A

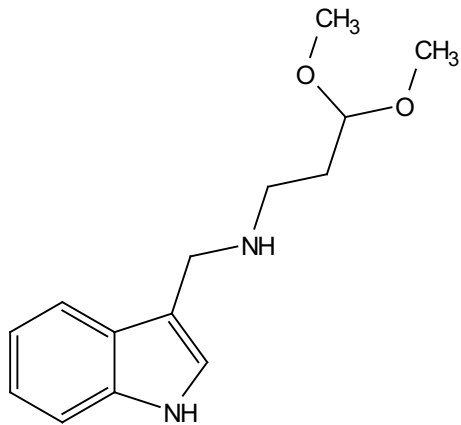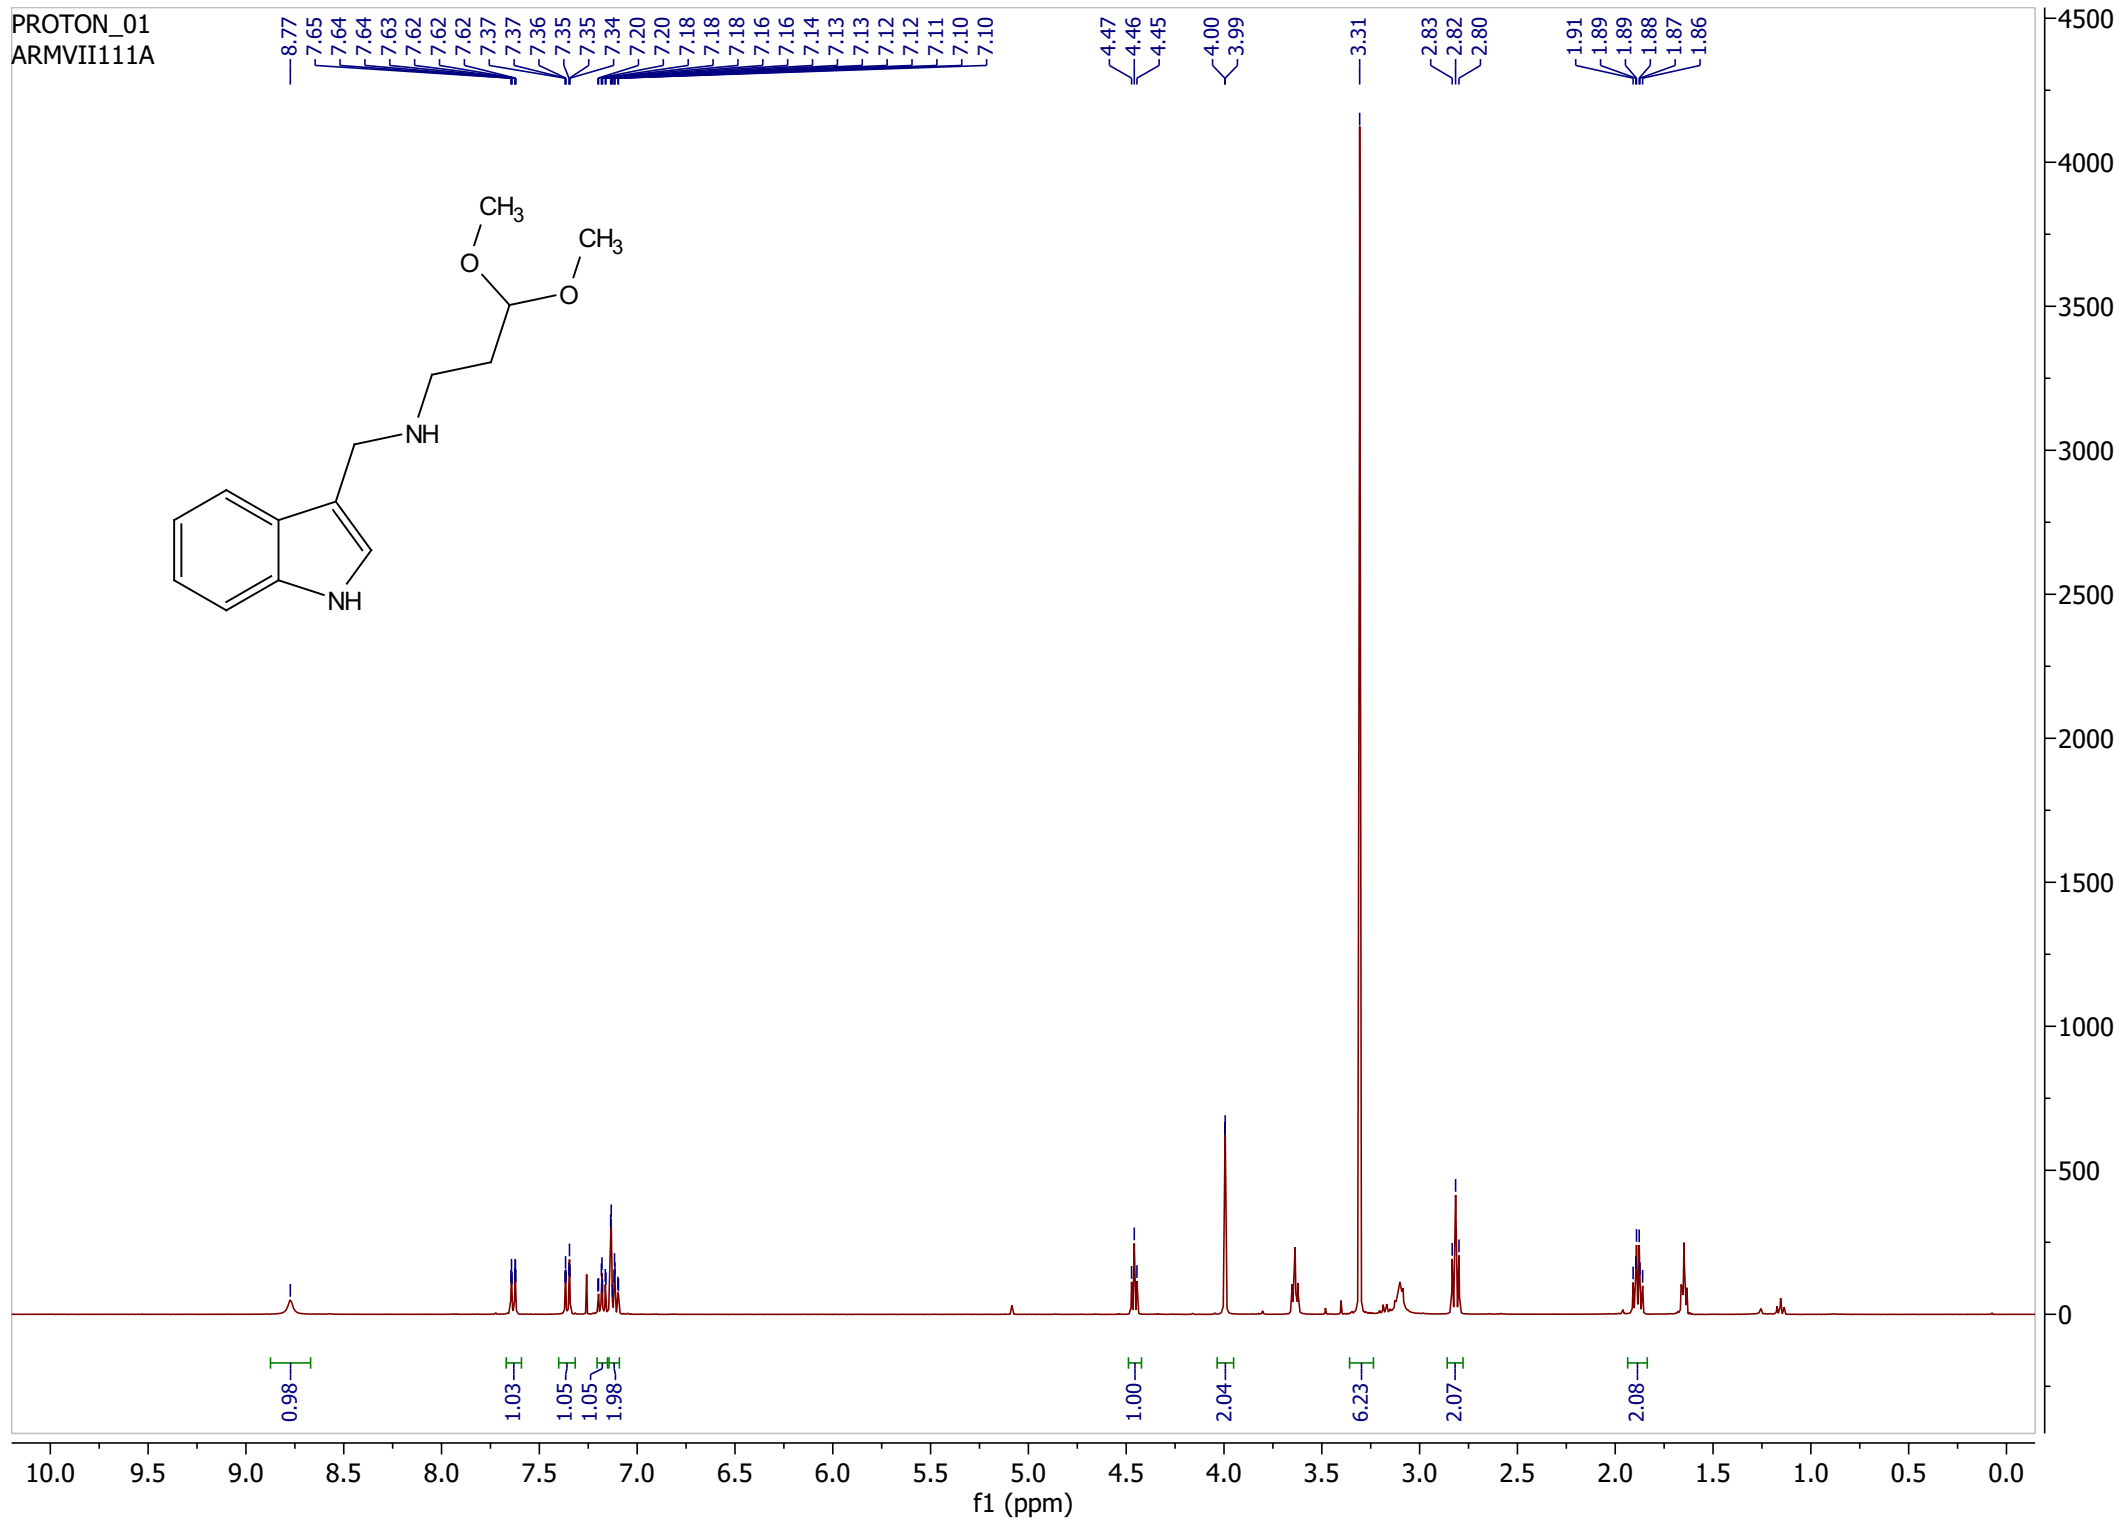

CARBON\_01  
ARMVII111A

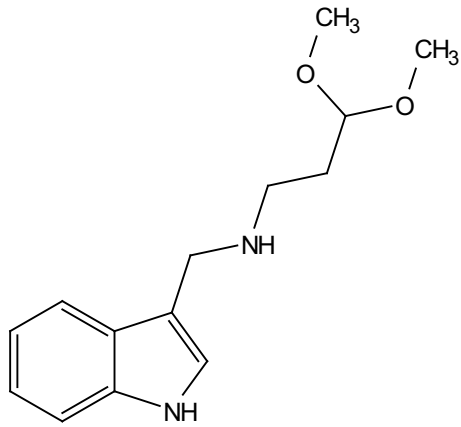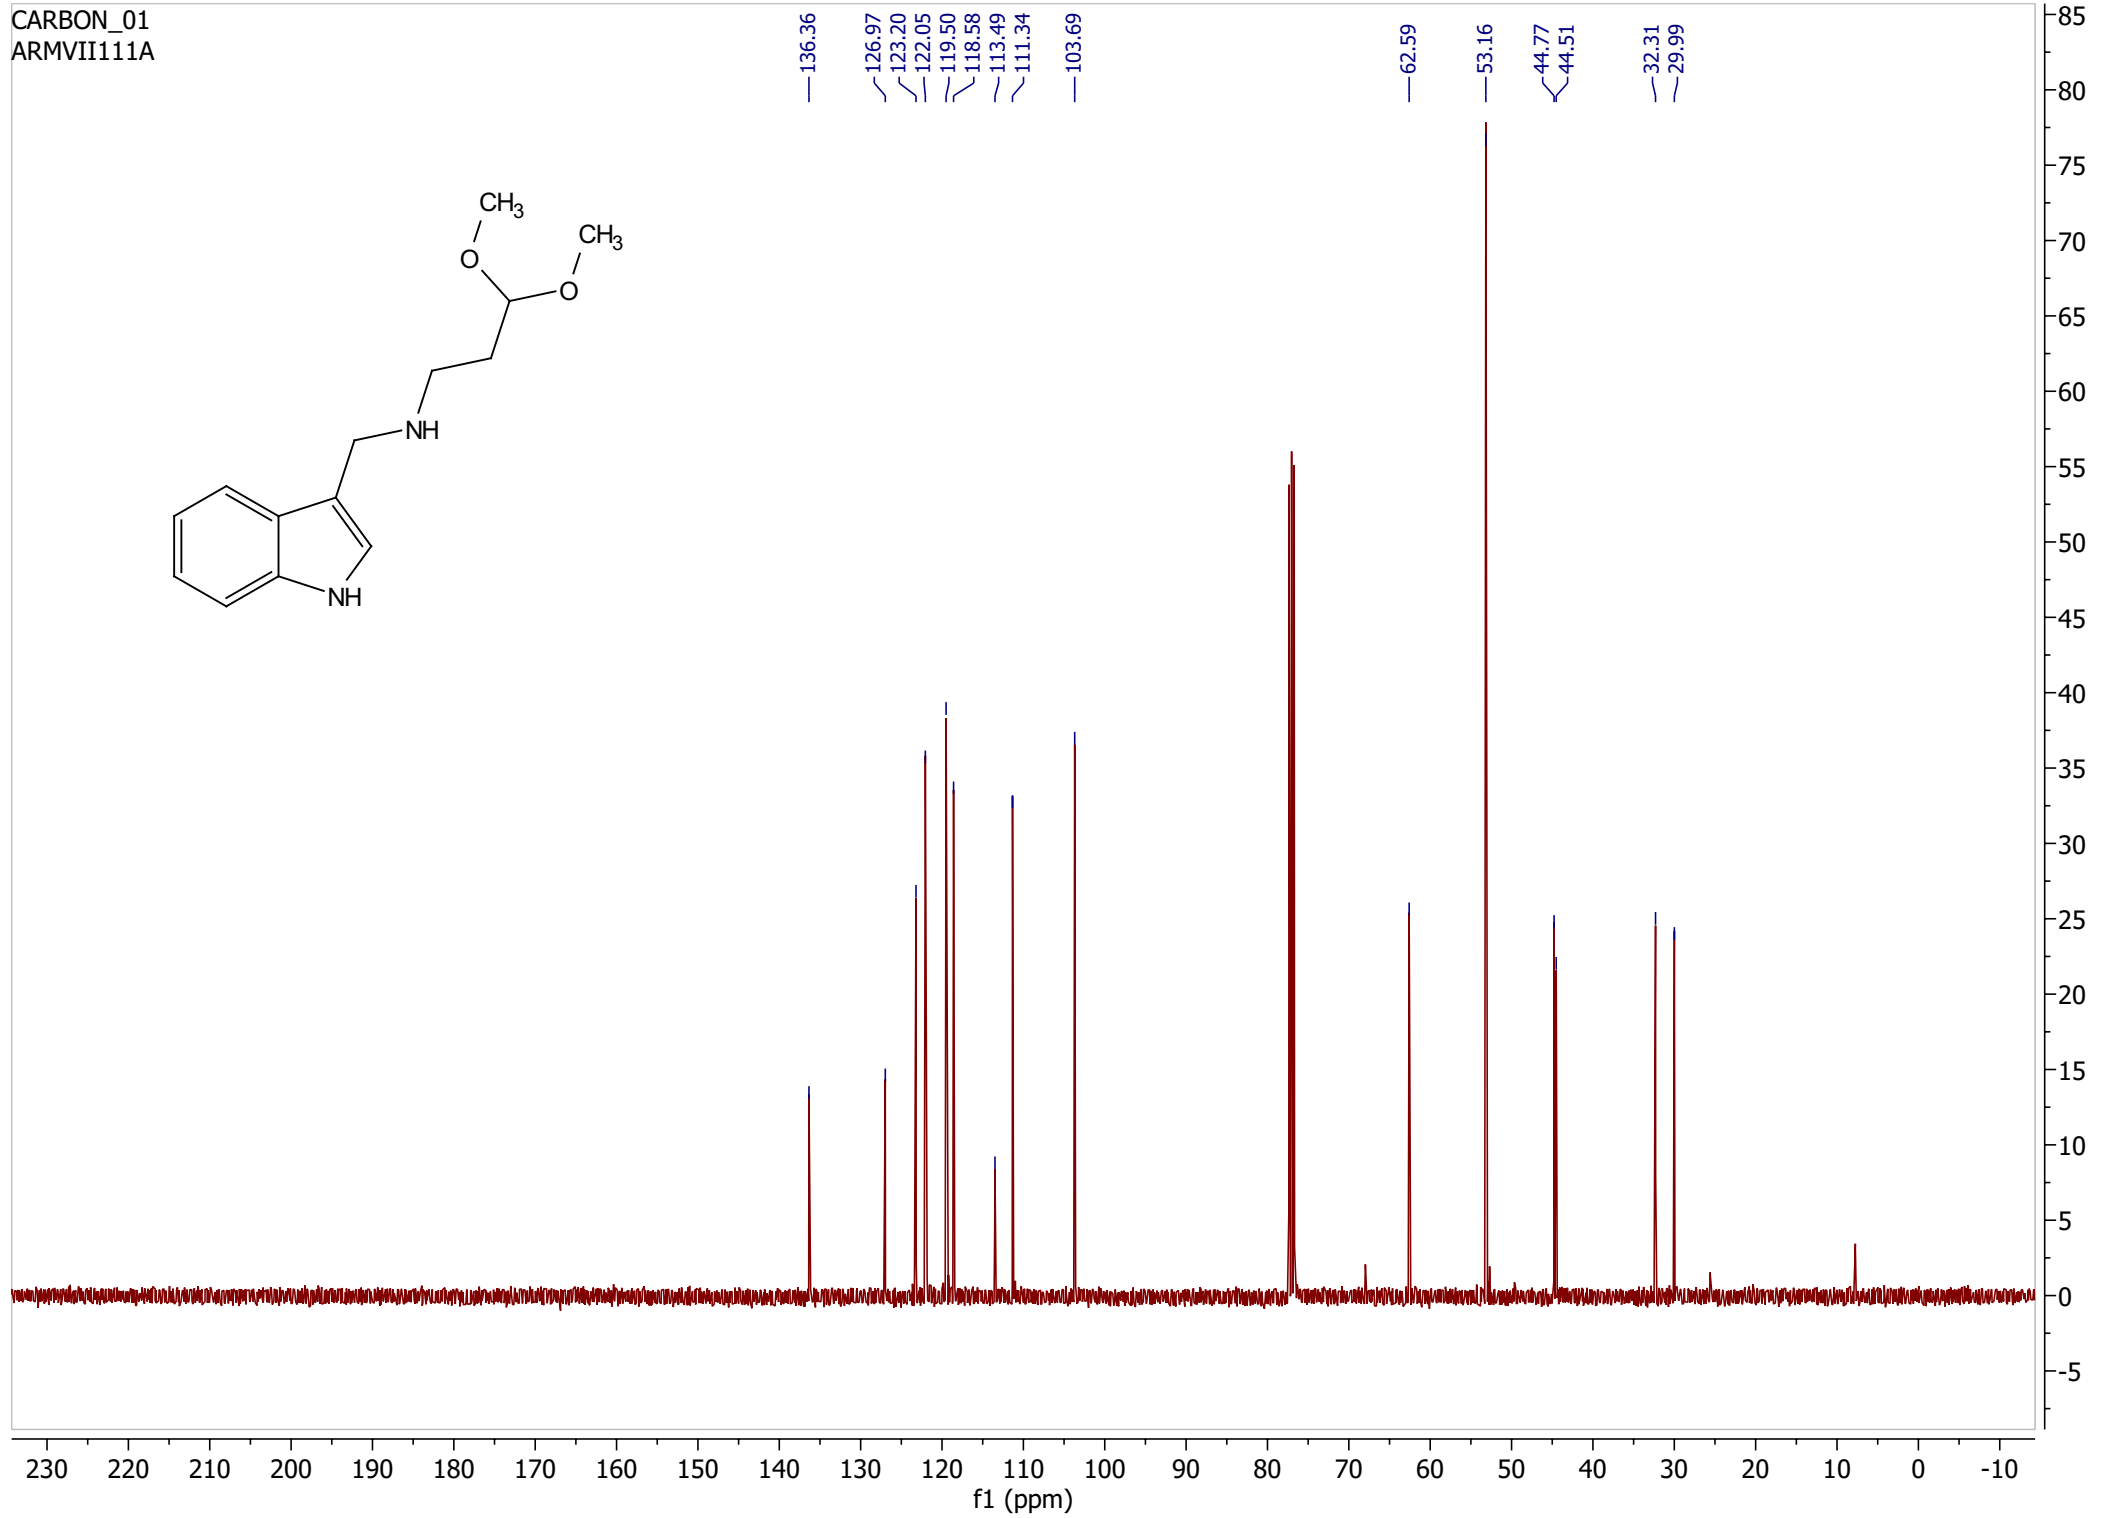

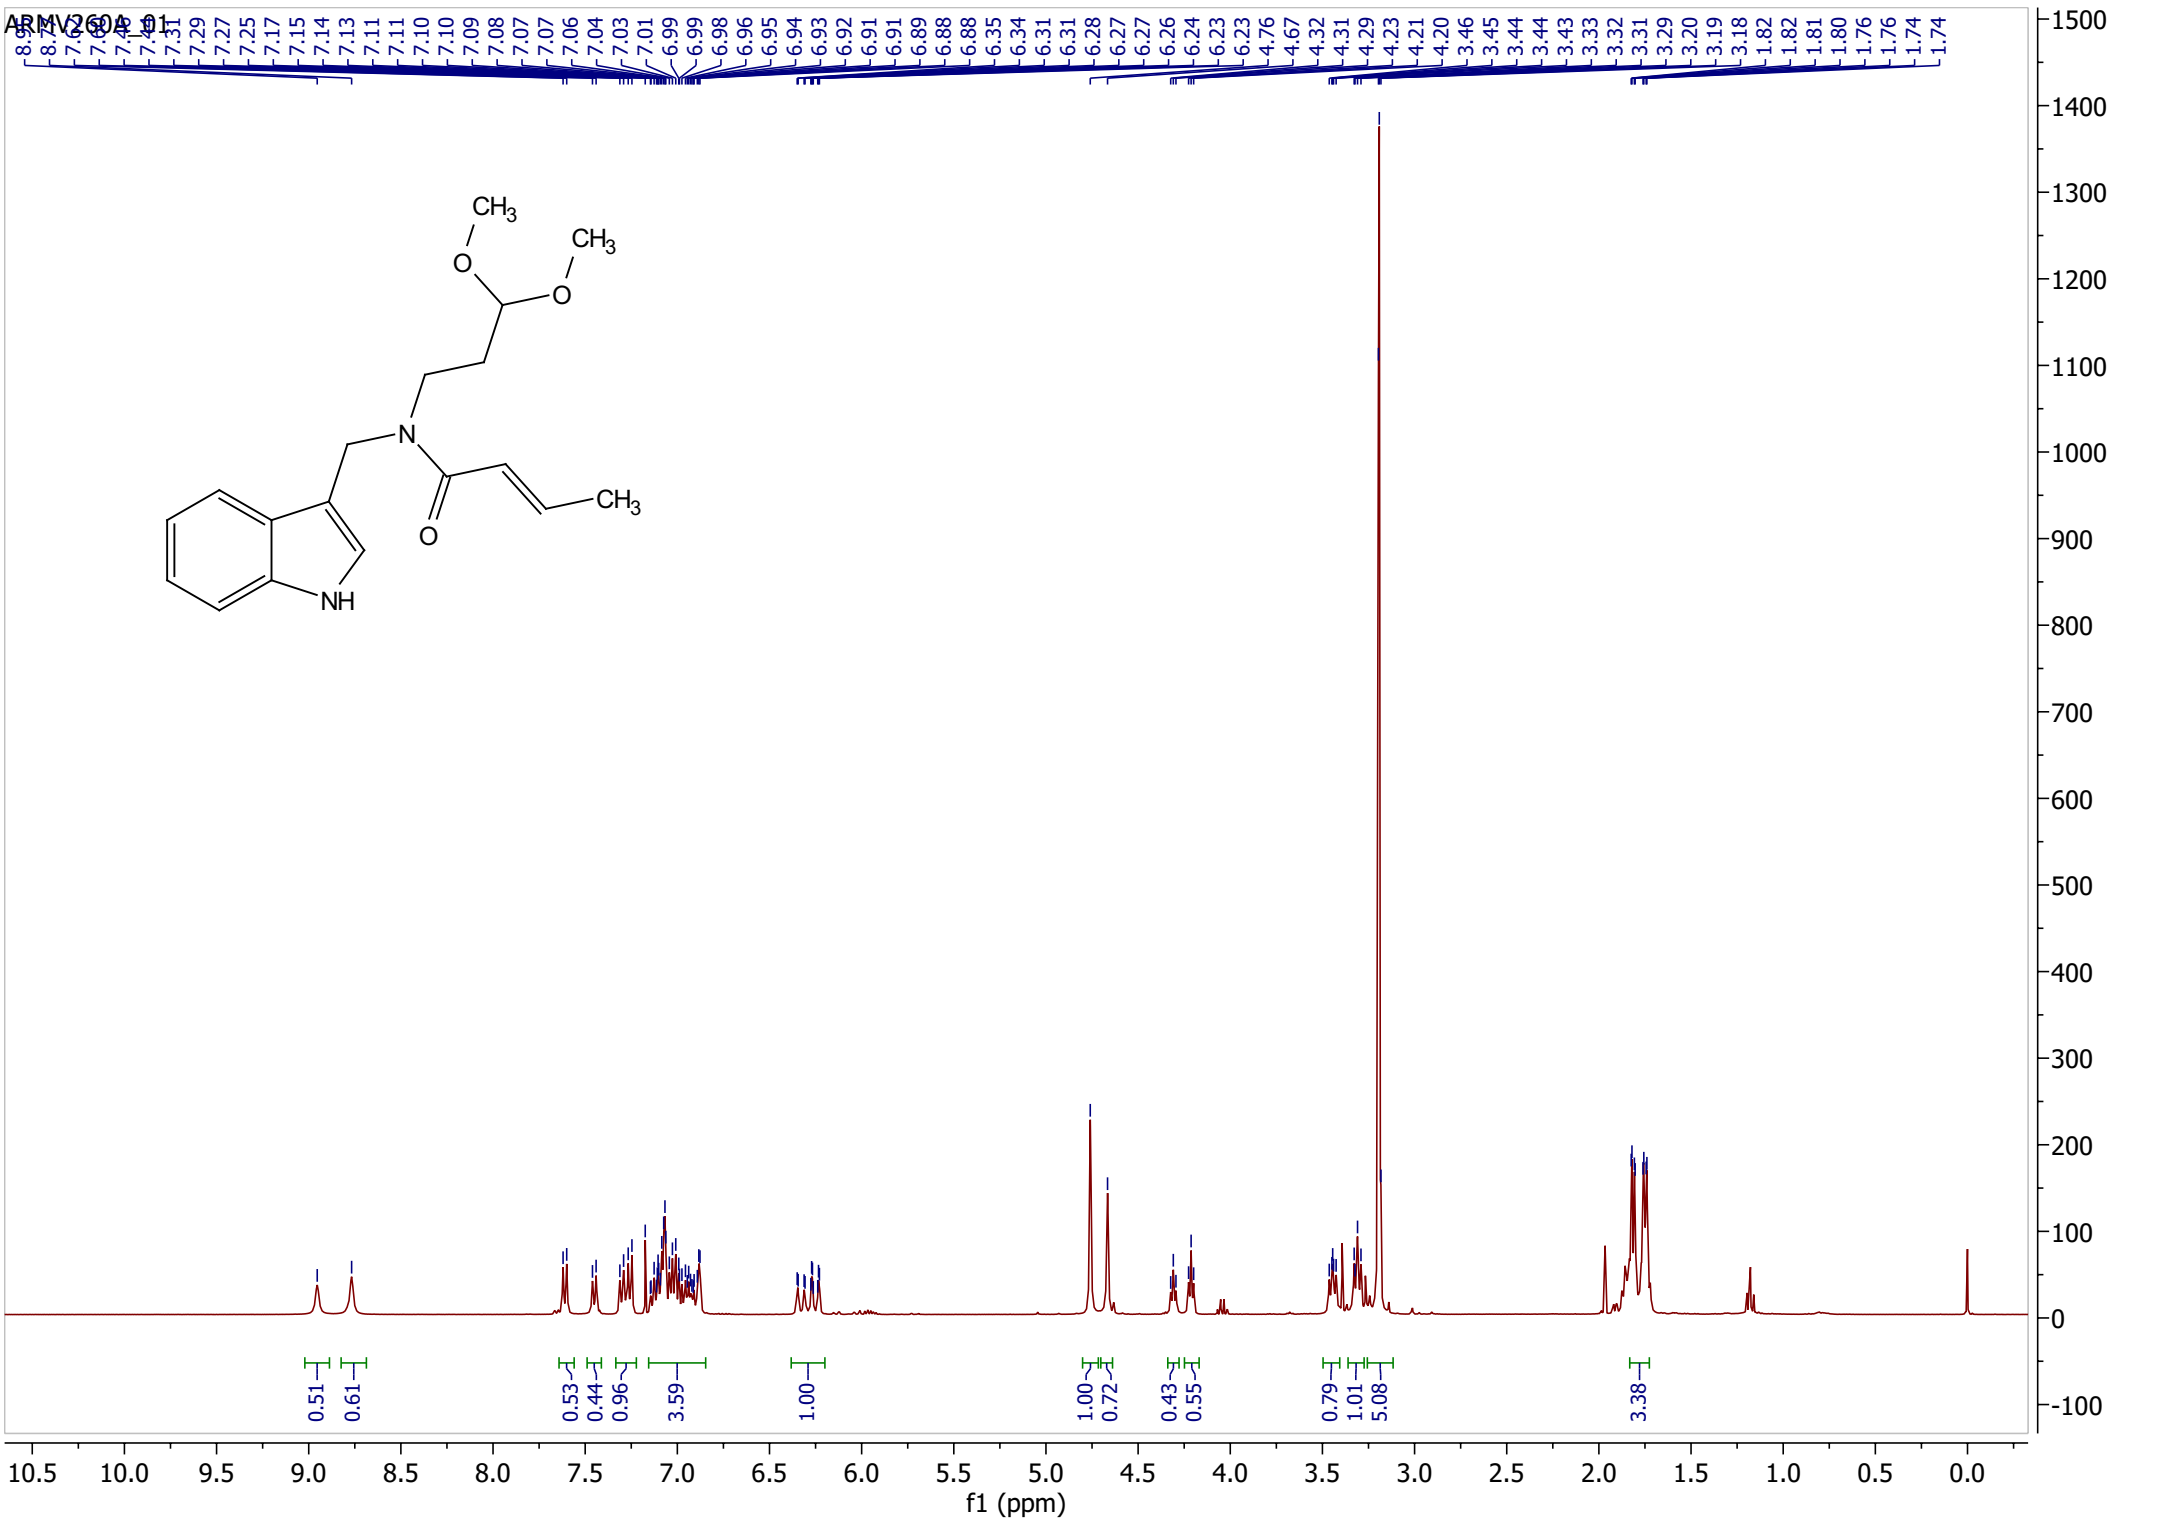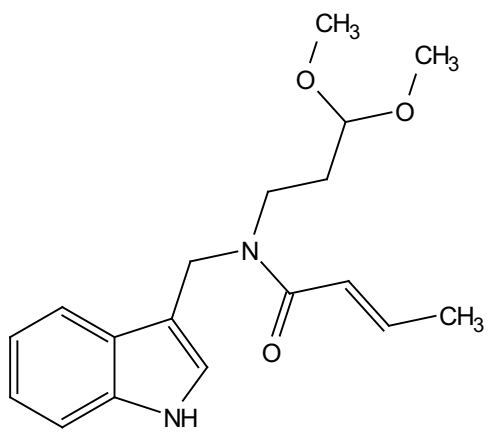

ARMV260A\_02

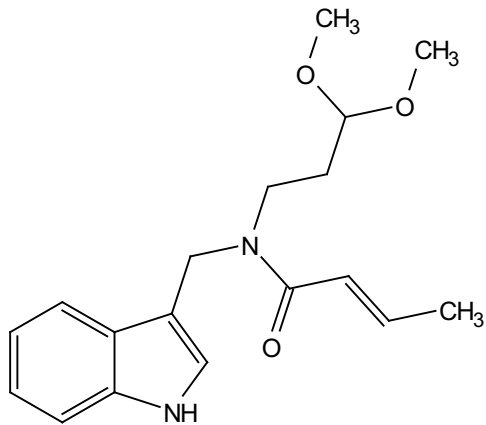

166.00  
165.48  
141.05  
140.92  
135.73  
135.35  
125.91  
124.94  
123.23  
121.52  
121.31  
121.14  
121.08  
120.94  
118.65  
118.62  
118.25  
117.36  
110.98  
110.60  
110.24  
101.87  
101.36

52.18  
51.87  
43.47  
41.52  
40.98  
38.95  
31.06  
29.85  
17.27  
17.18

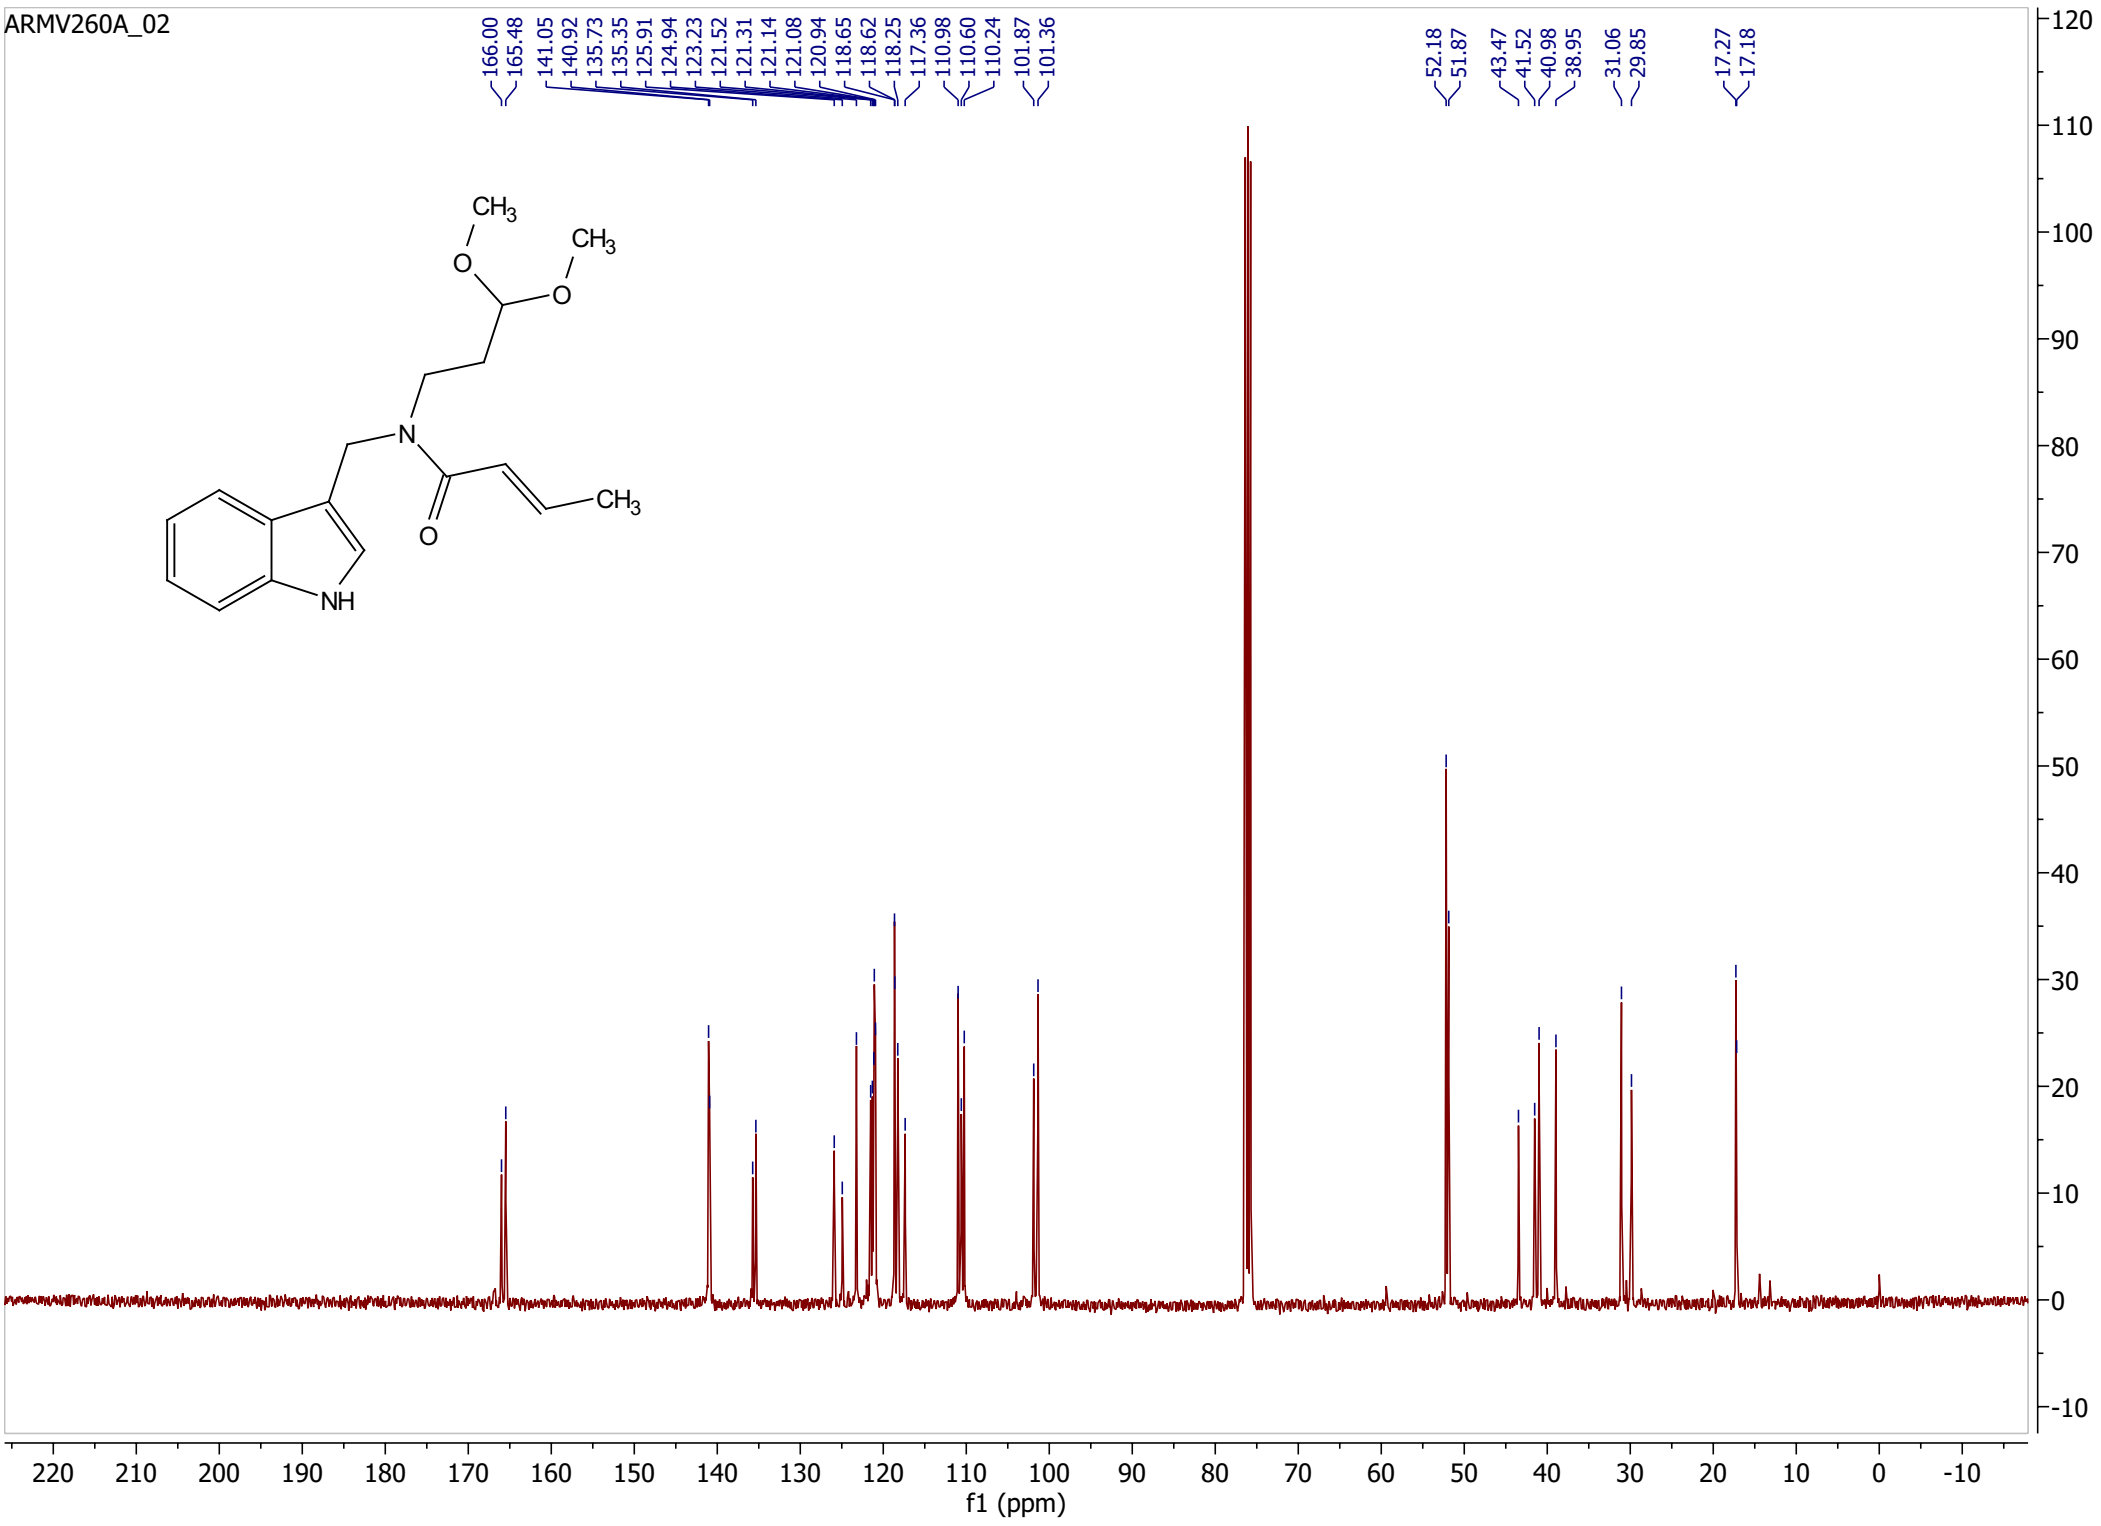

ARMV287a\_01

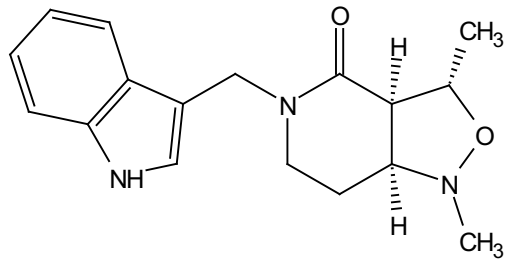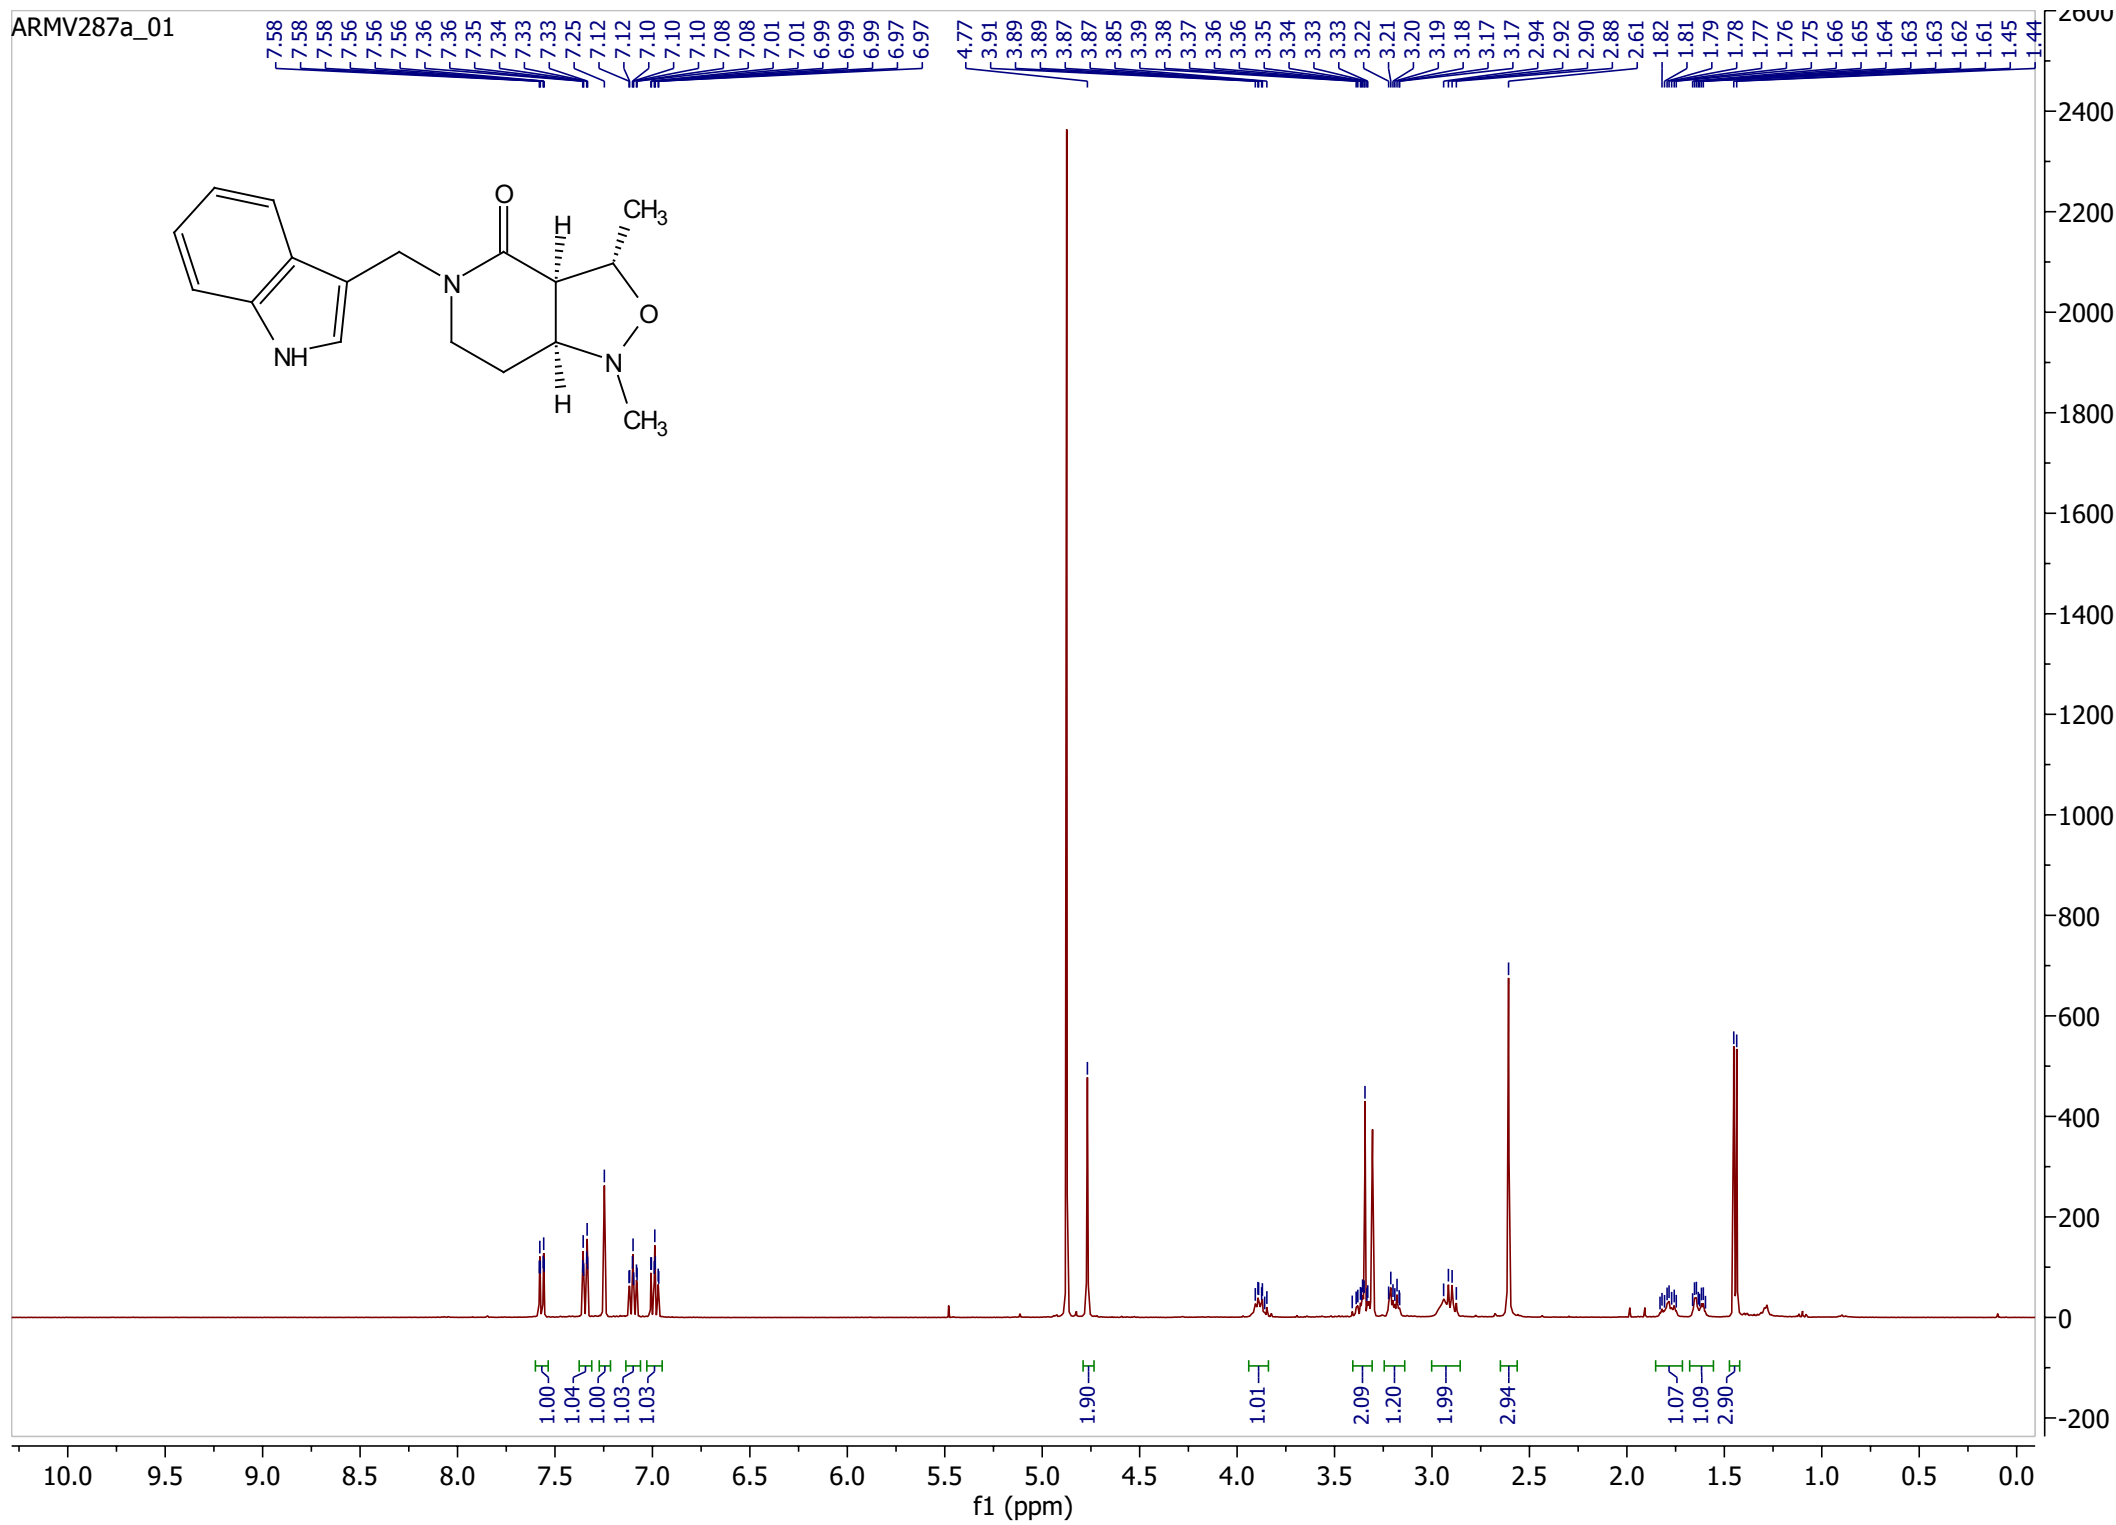

ARMV287a\_02

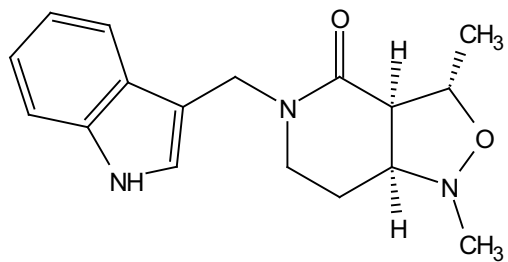

169.26

136.94

126.52

124.52

121.38

118.72

118.44

111.01

109.80

77.36

66.19

54.91

41.39

41.12

24.10

18.09

220 210 200 190 180 170 160 150 140 130 120 110 100 90 80 70 60 50 40 30 20 10 0 -10

f1 (ppm)

250  
200  
150  
100  
50  
0



7.67, 7.66, 7.65, 7.58, 7.56, 7.35, 7.35, 7.35, 7.33, 7.33, 7.22, 7.11, 7.11, 7.09, 7.09, 7.07, 7.07, 7.00, 7.00, 6.99, 6.98, 6.98, 6.97, 6.96, 4.98, 4.94, 4.94, 4.51, 4.48, 4.48, 3.39, 3.38, 3.37, 3.36, 3.36, 3.35, 3.34, 3.33, 3.33, 3.24, 3.23, 3.23, 3.21, 3.20, 3.20, 3.18, 3.15, 3.14, 3.13, 3.12, 3.11, 3.11, 2.46, 2.45, 2.44, 2.44, 2.43, 2.33, 2.33, 2.05, 2.03, 2.03, 2.02, 2.01, 2.01, 2.00, 1.99, 1.98, 1.98, 1.75, 1.75, 1.74, 1.74, 1.74, 1.73, 1.73, 1.72, 1.71, 1.71, 1.70, 1.30, 1.29

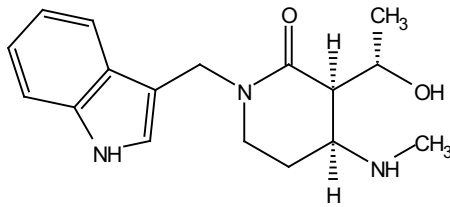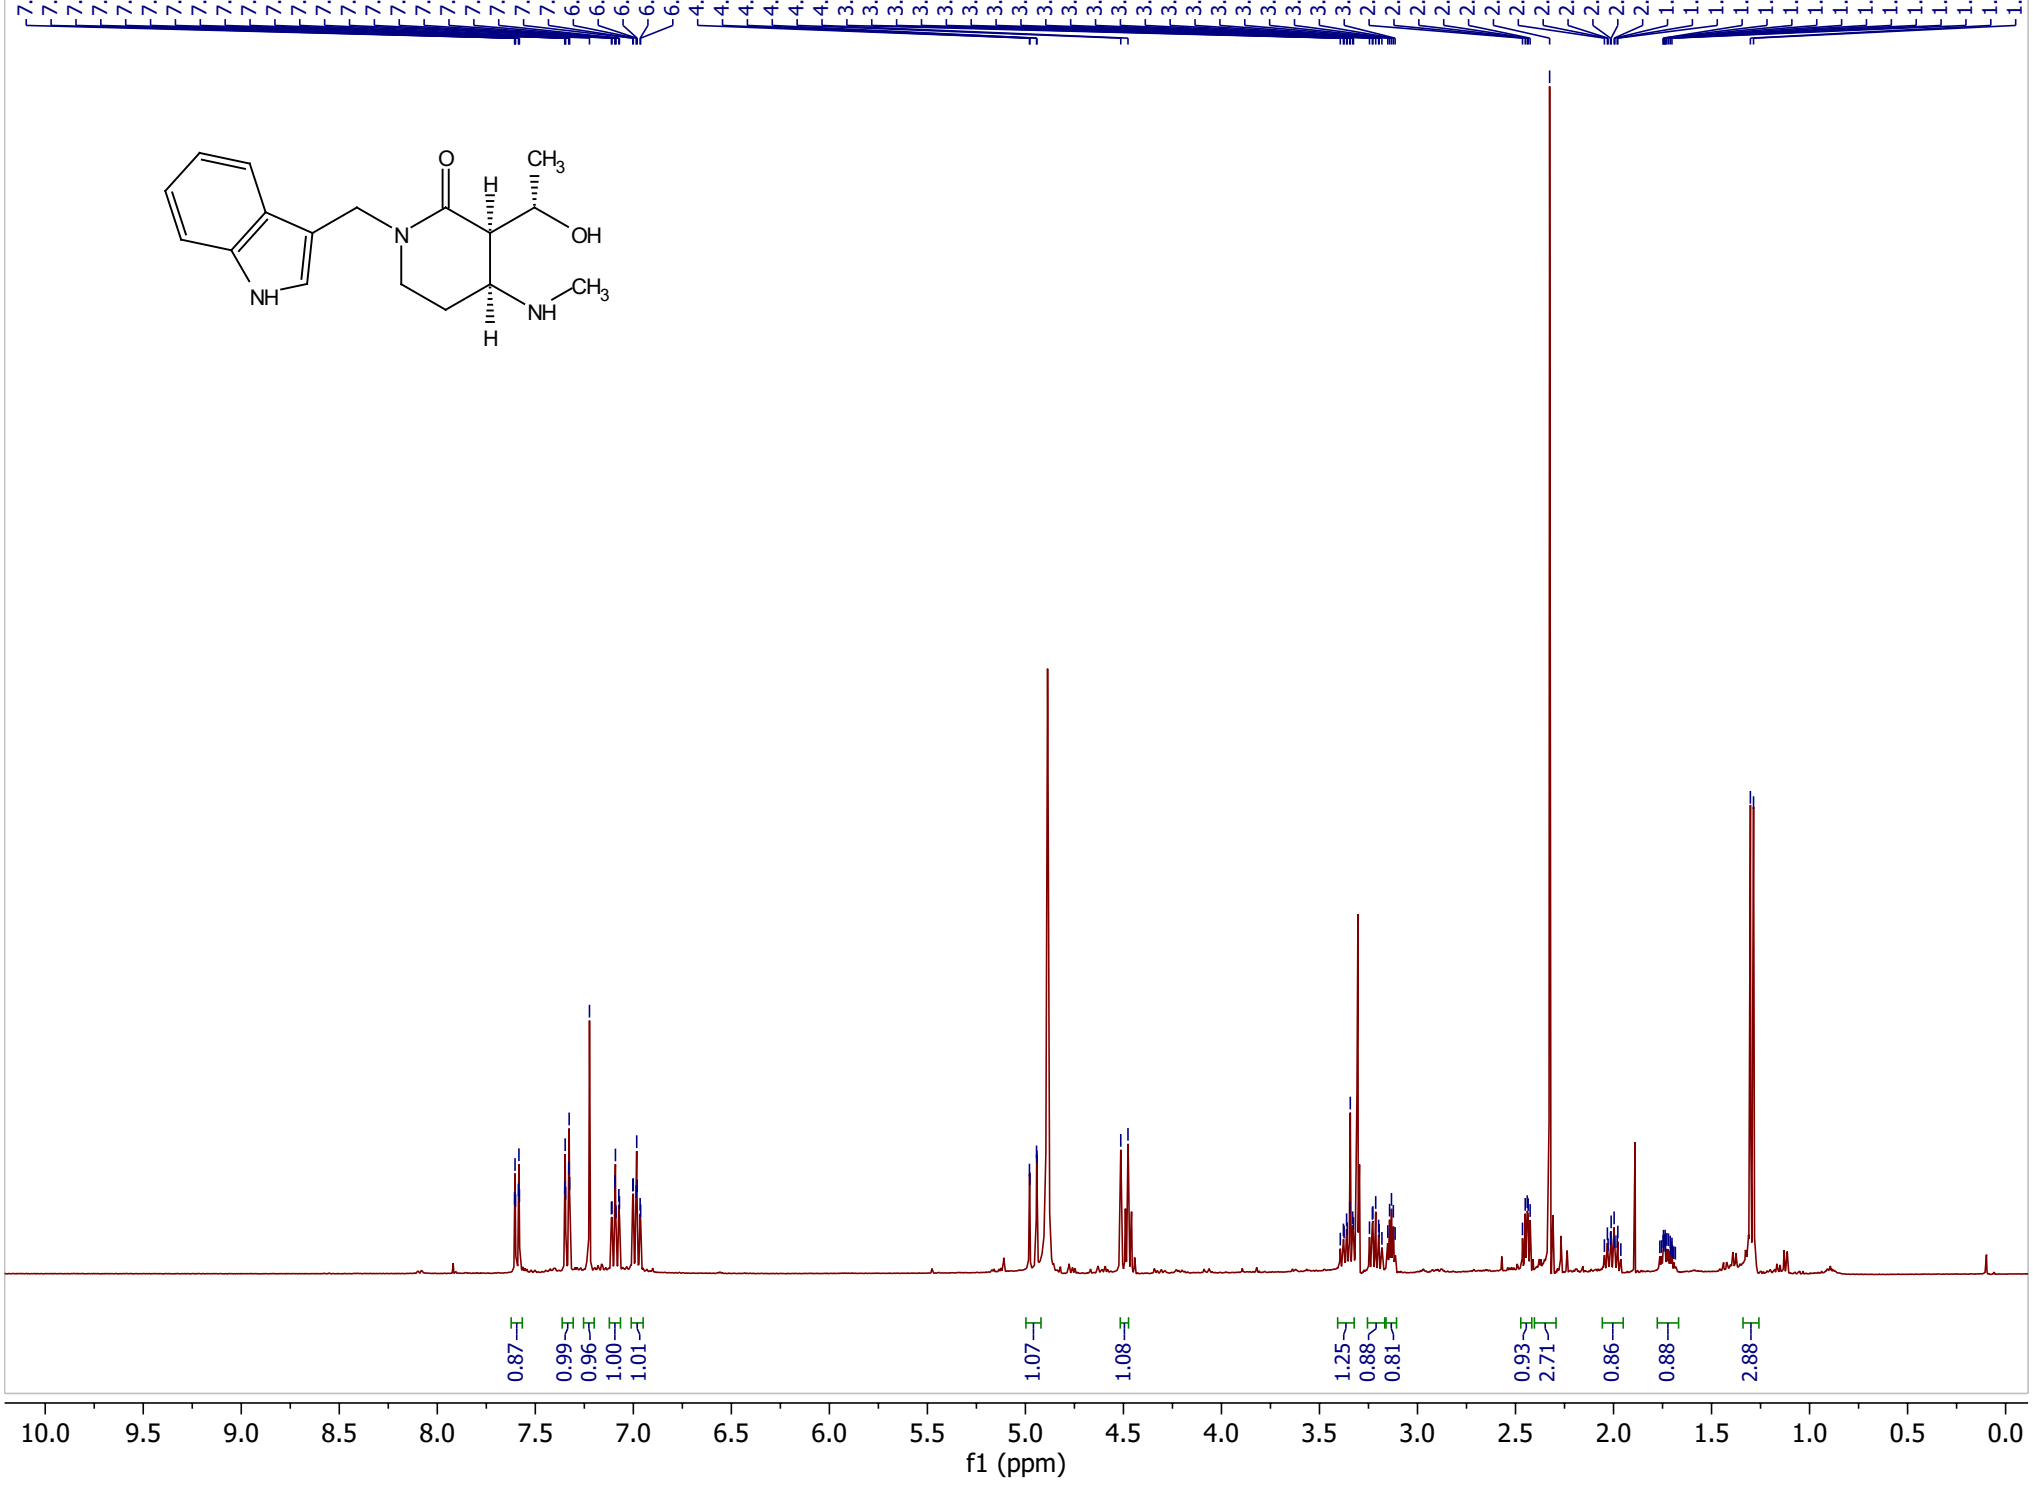

ARMV298\_01 1

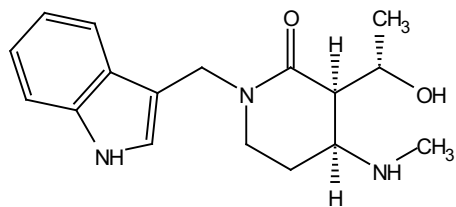

169.73  
136.83  
126.67  
124.44  
121.29  
118.67  
118.43  
110.95  
110.13  
66.29  
54.86  
50.15  
42.11  
40.77  
32.45  
23.85  
20.98

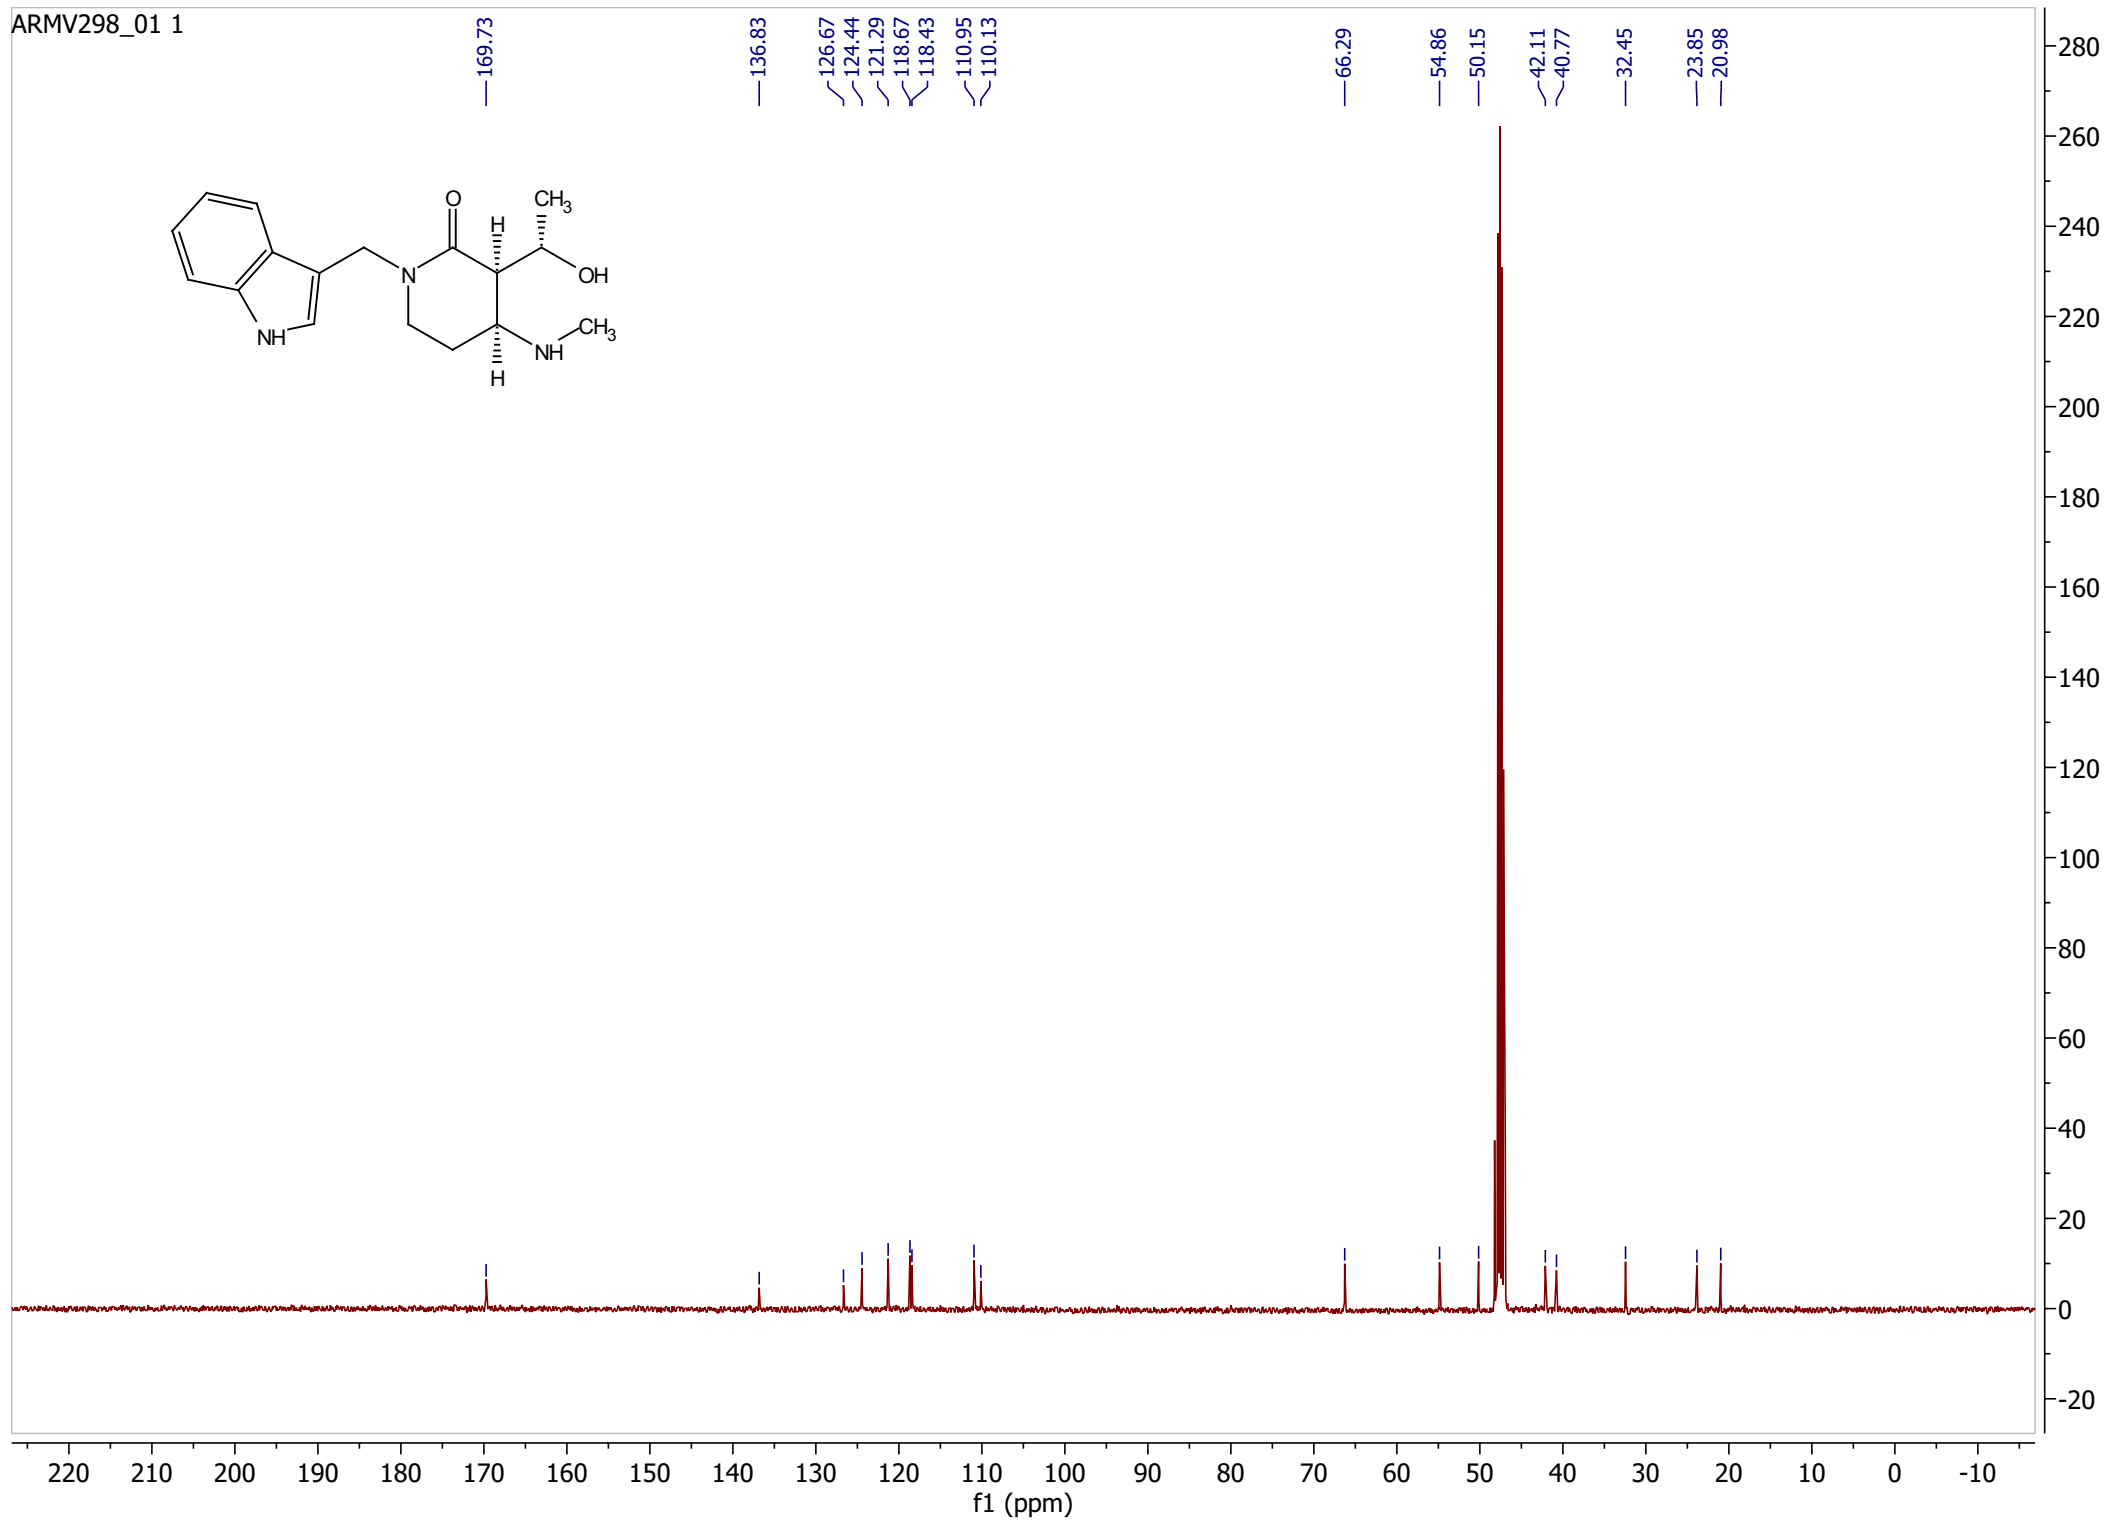

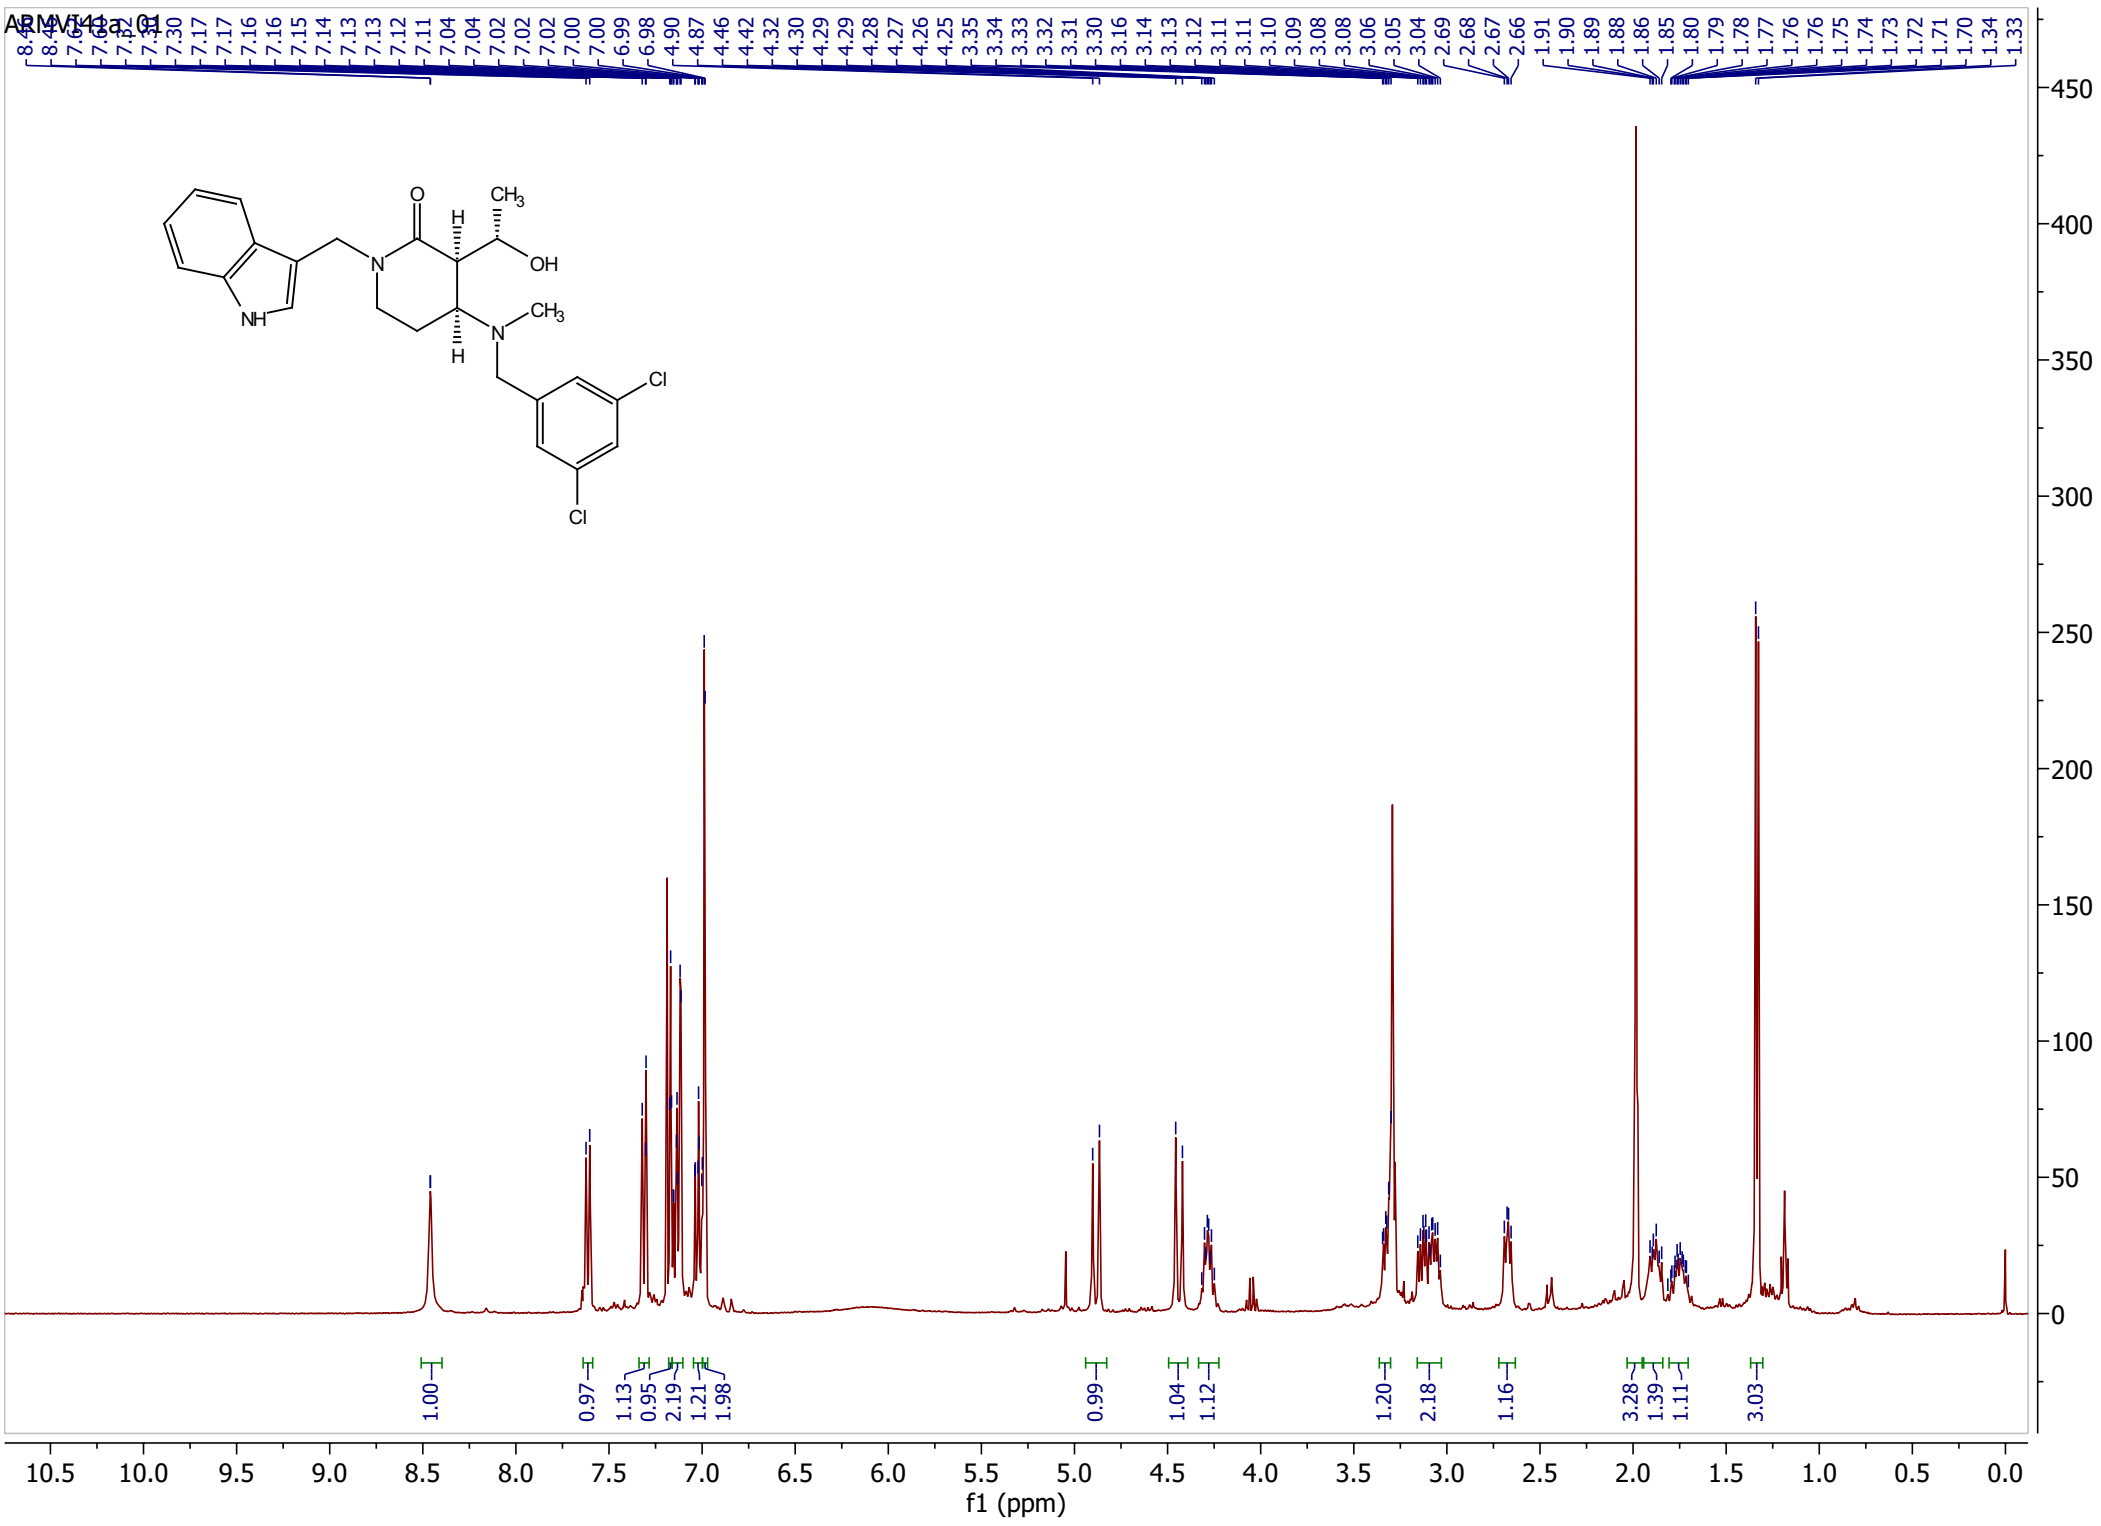

APM 400

7.30  
7.17  
7.16  
7.15  
7.14  
7.13  
7.12  
7.11  
7.04  
7.02  
7.02  
7.00  
7.00  
6.99  
6.98  
4.90  
4.87  
4.46  
4.42  
4.32  
4.30  
4.29  
4.28  
4.27  
4.26  
4.25  
3.35  
3.34  
3.33  
3.32  
3.31  
3.30  
3.16  
3.14  
3.13  
3.12  
3.11  
3.10  
3.09  
3.08  
3.08  
3.06  
3.05  
3.04  
2.69  
2.68  
2.67  
2.66  
1.91  
1.90  
1.89  
1.88  
1.86  
1.85  
1.80  
1.79  
1.78  
1.77  
1.76  
1.76  
1.75  
1.74  
1.73  
1.72  
1.71  
1.70  
1.34  
1.33

ARMVI41a\_02

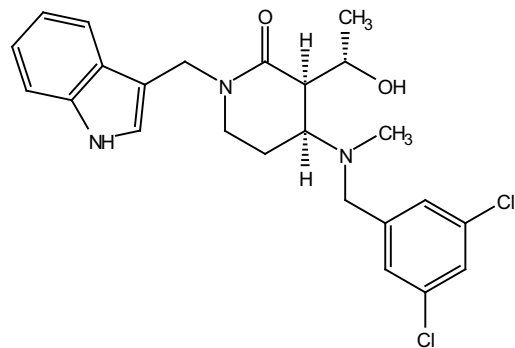

169.75

141.21  
136.33  
135.12  
127.73  
127.06  
126.79  
124.30  
122.44  
119.94  
119.36  
111.51  
111.28

66.50

60.46

57.49

50.28

43.54

40.81

38.65

22.65

21.62

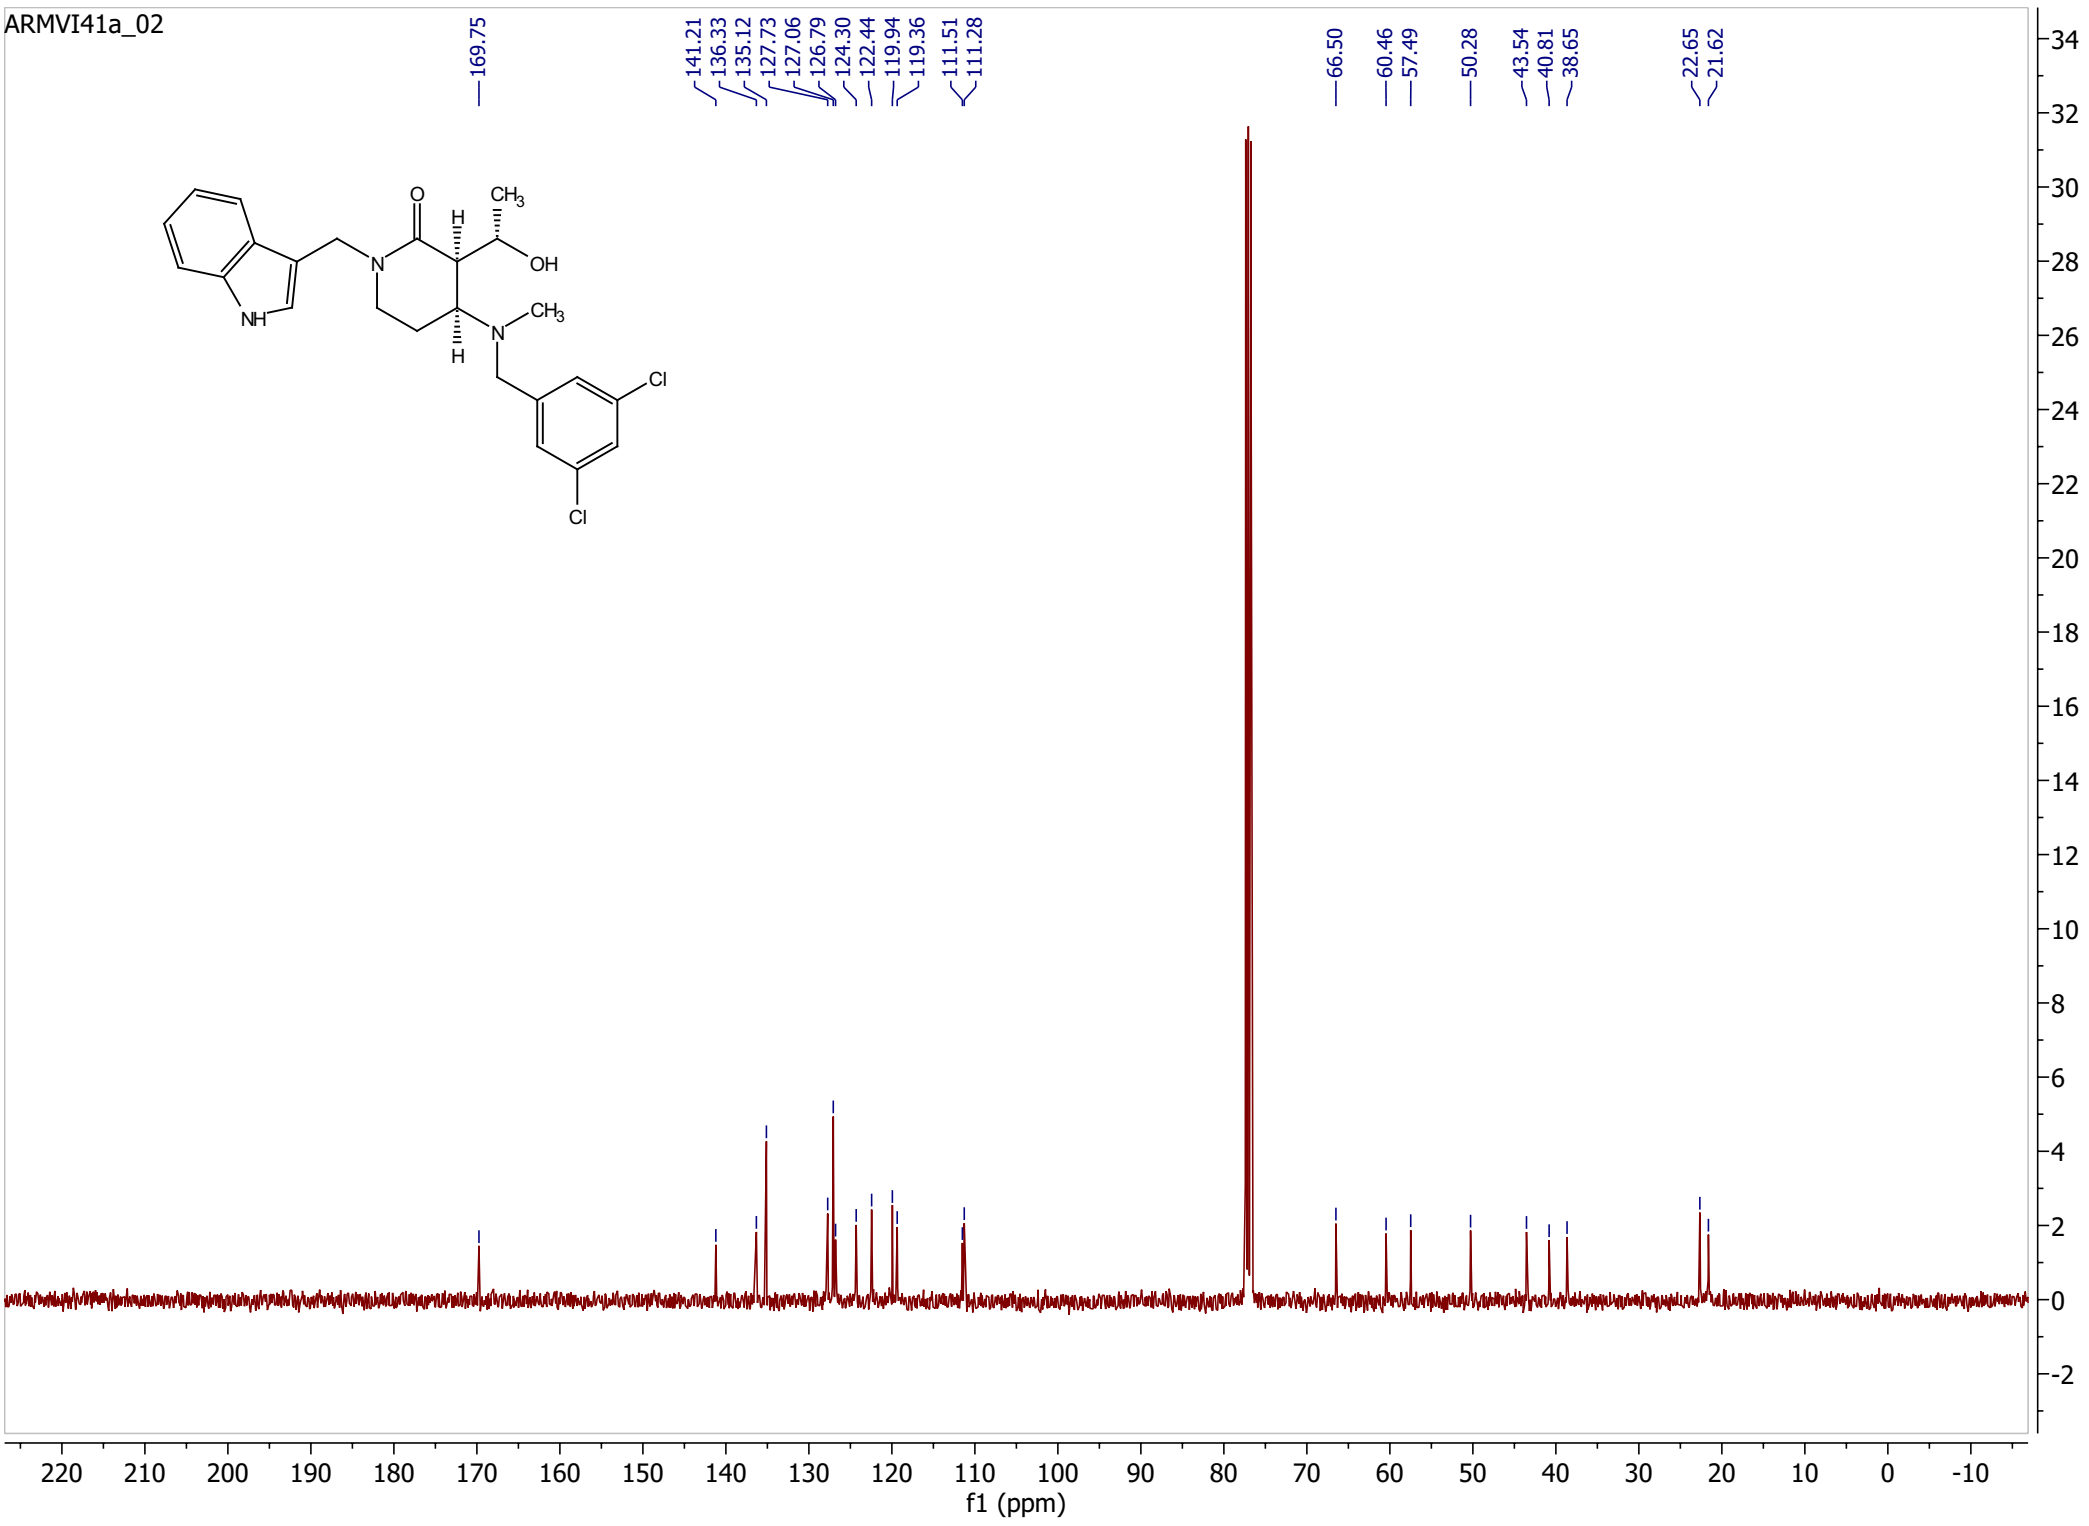

ARMV245B  
STANDARD 1H OBSERVE

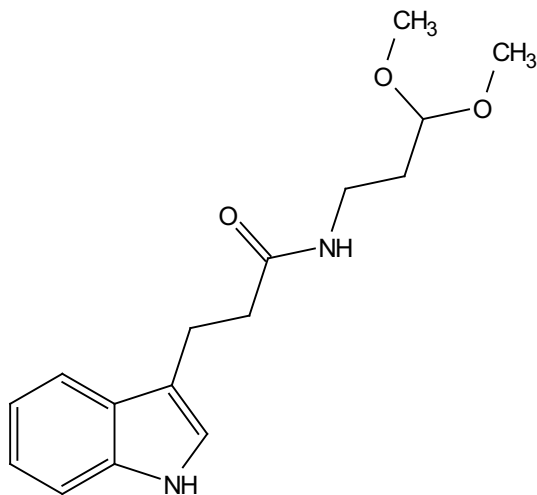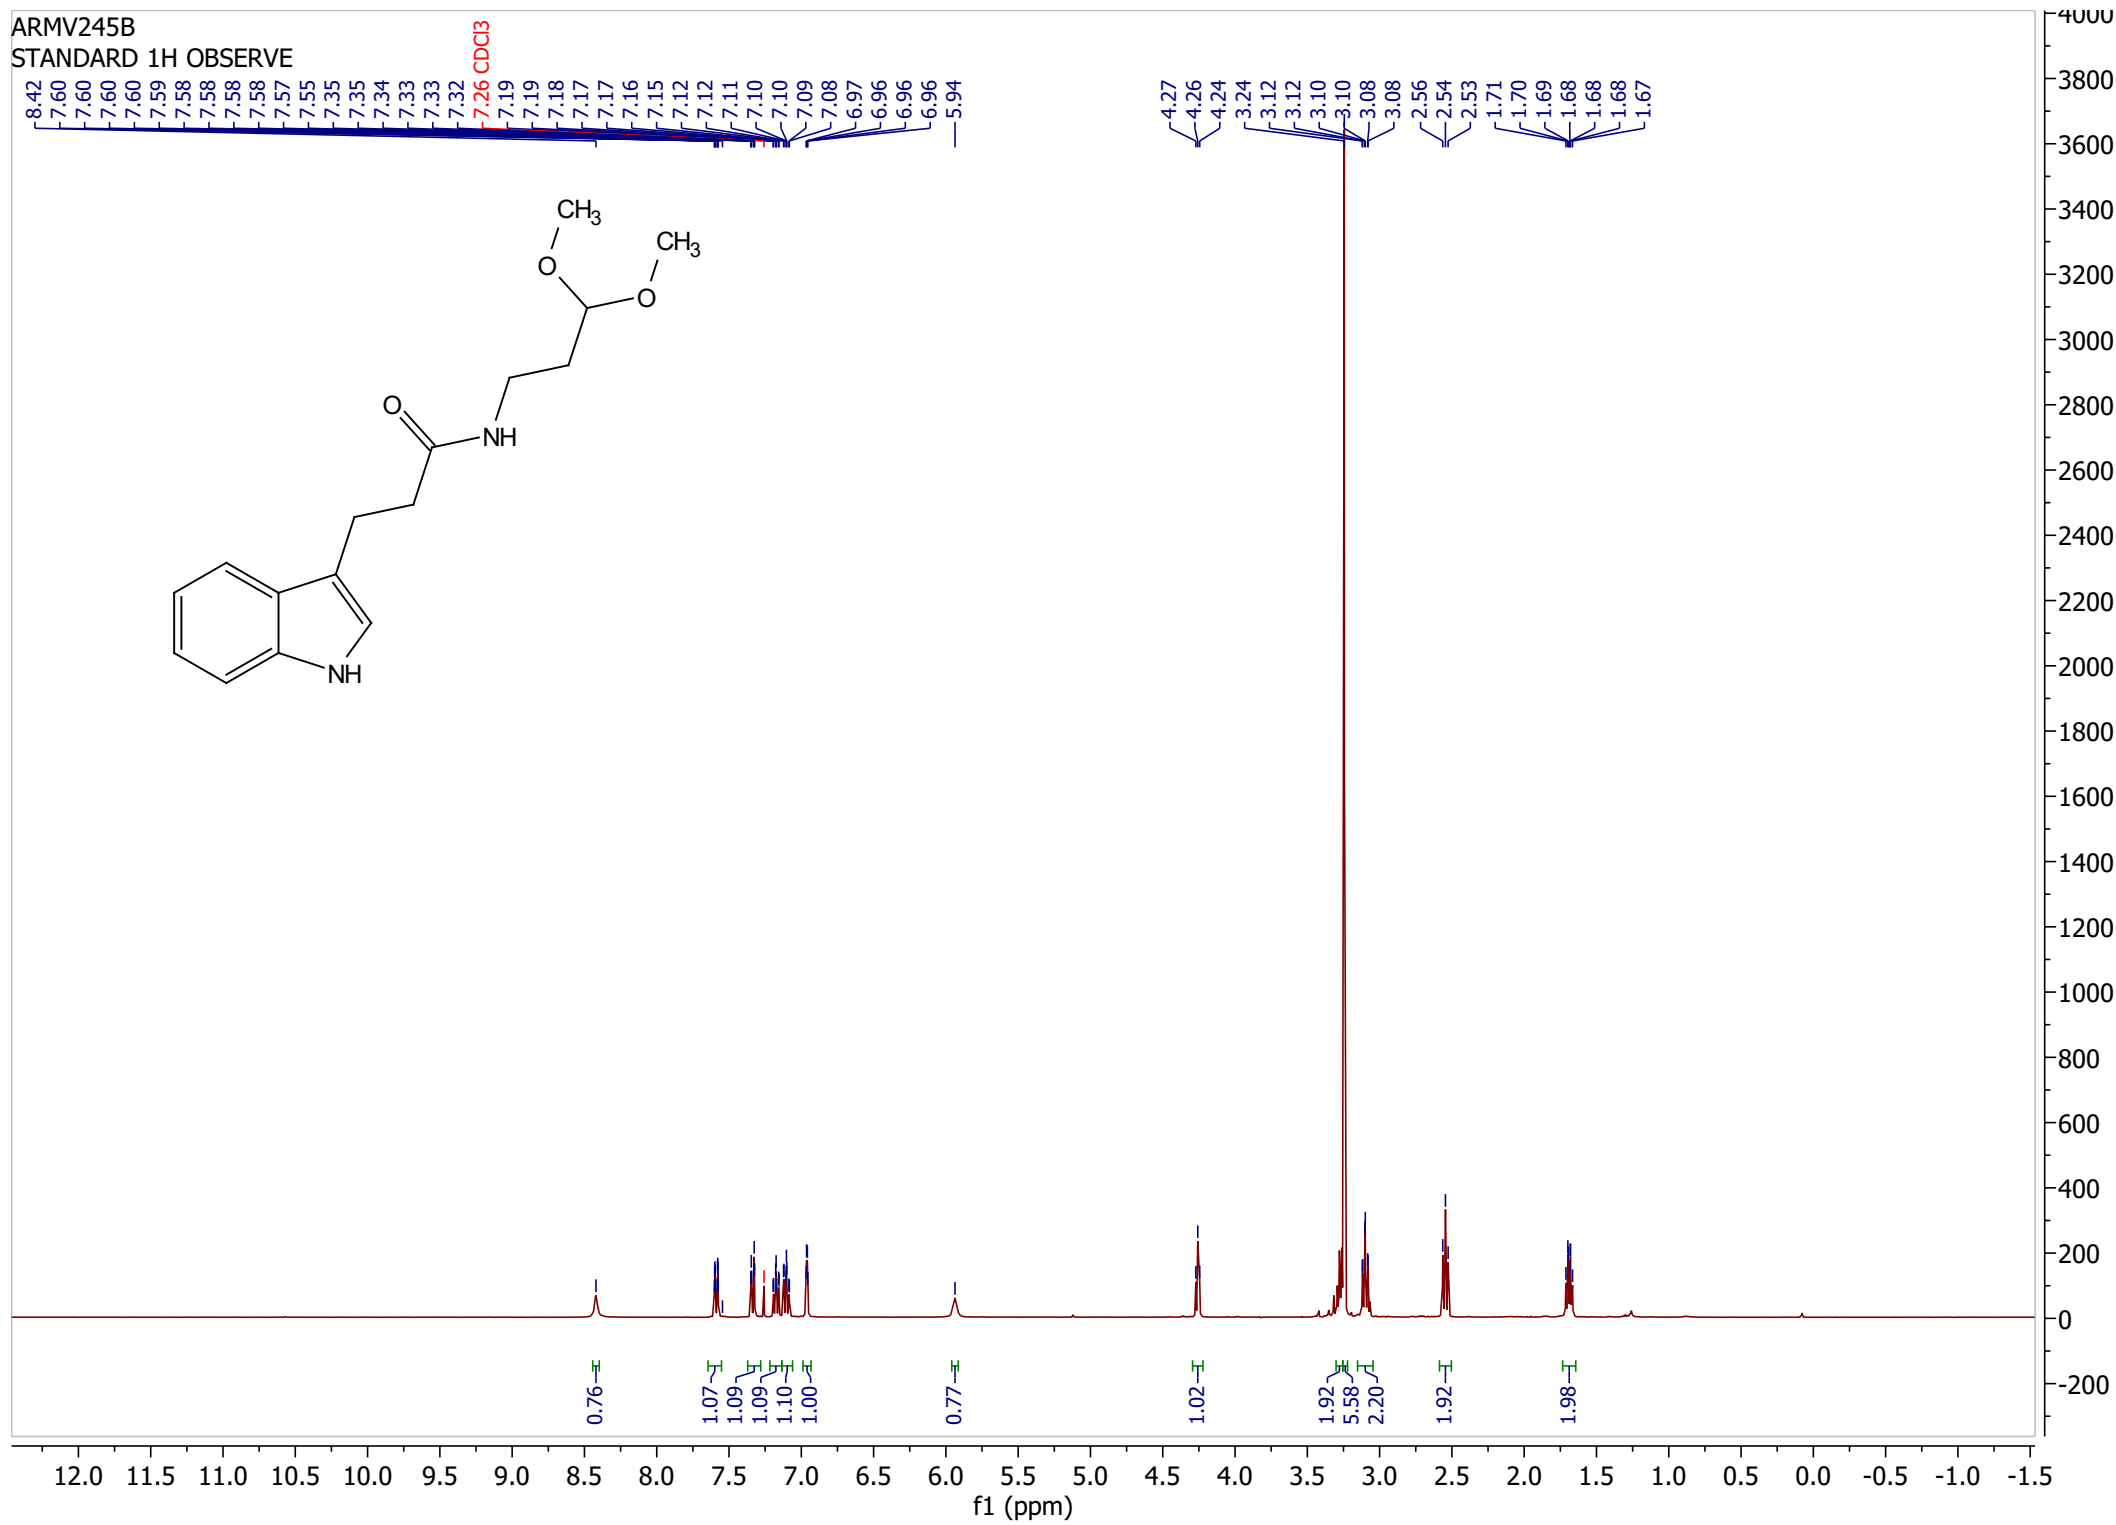

ARMV245B\_01

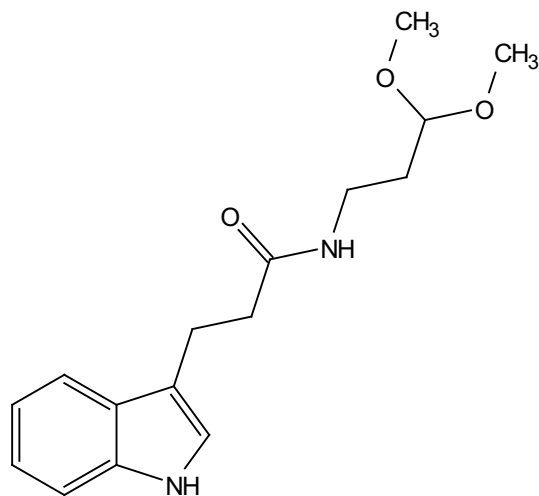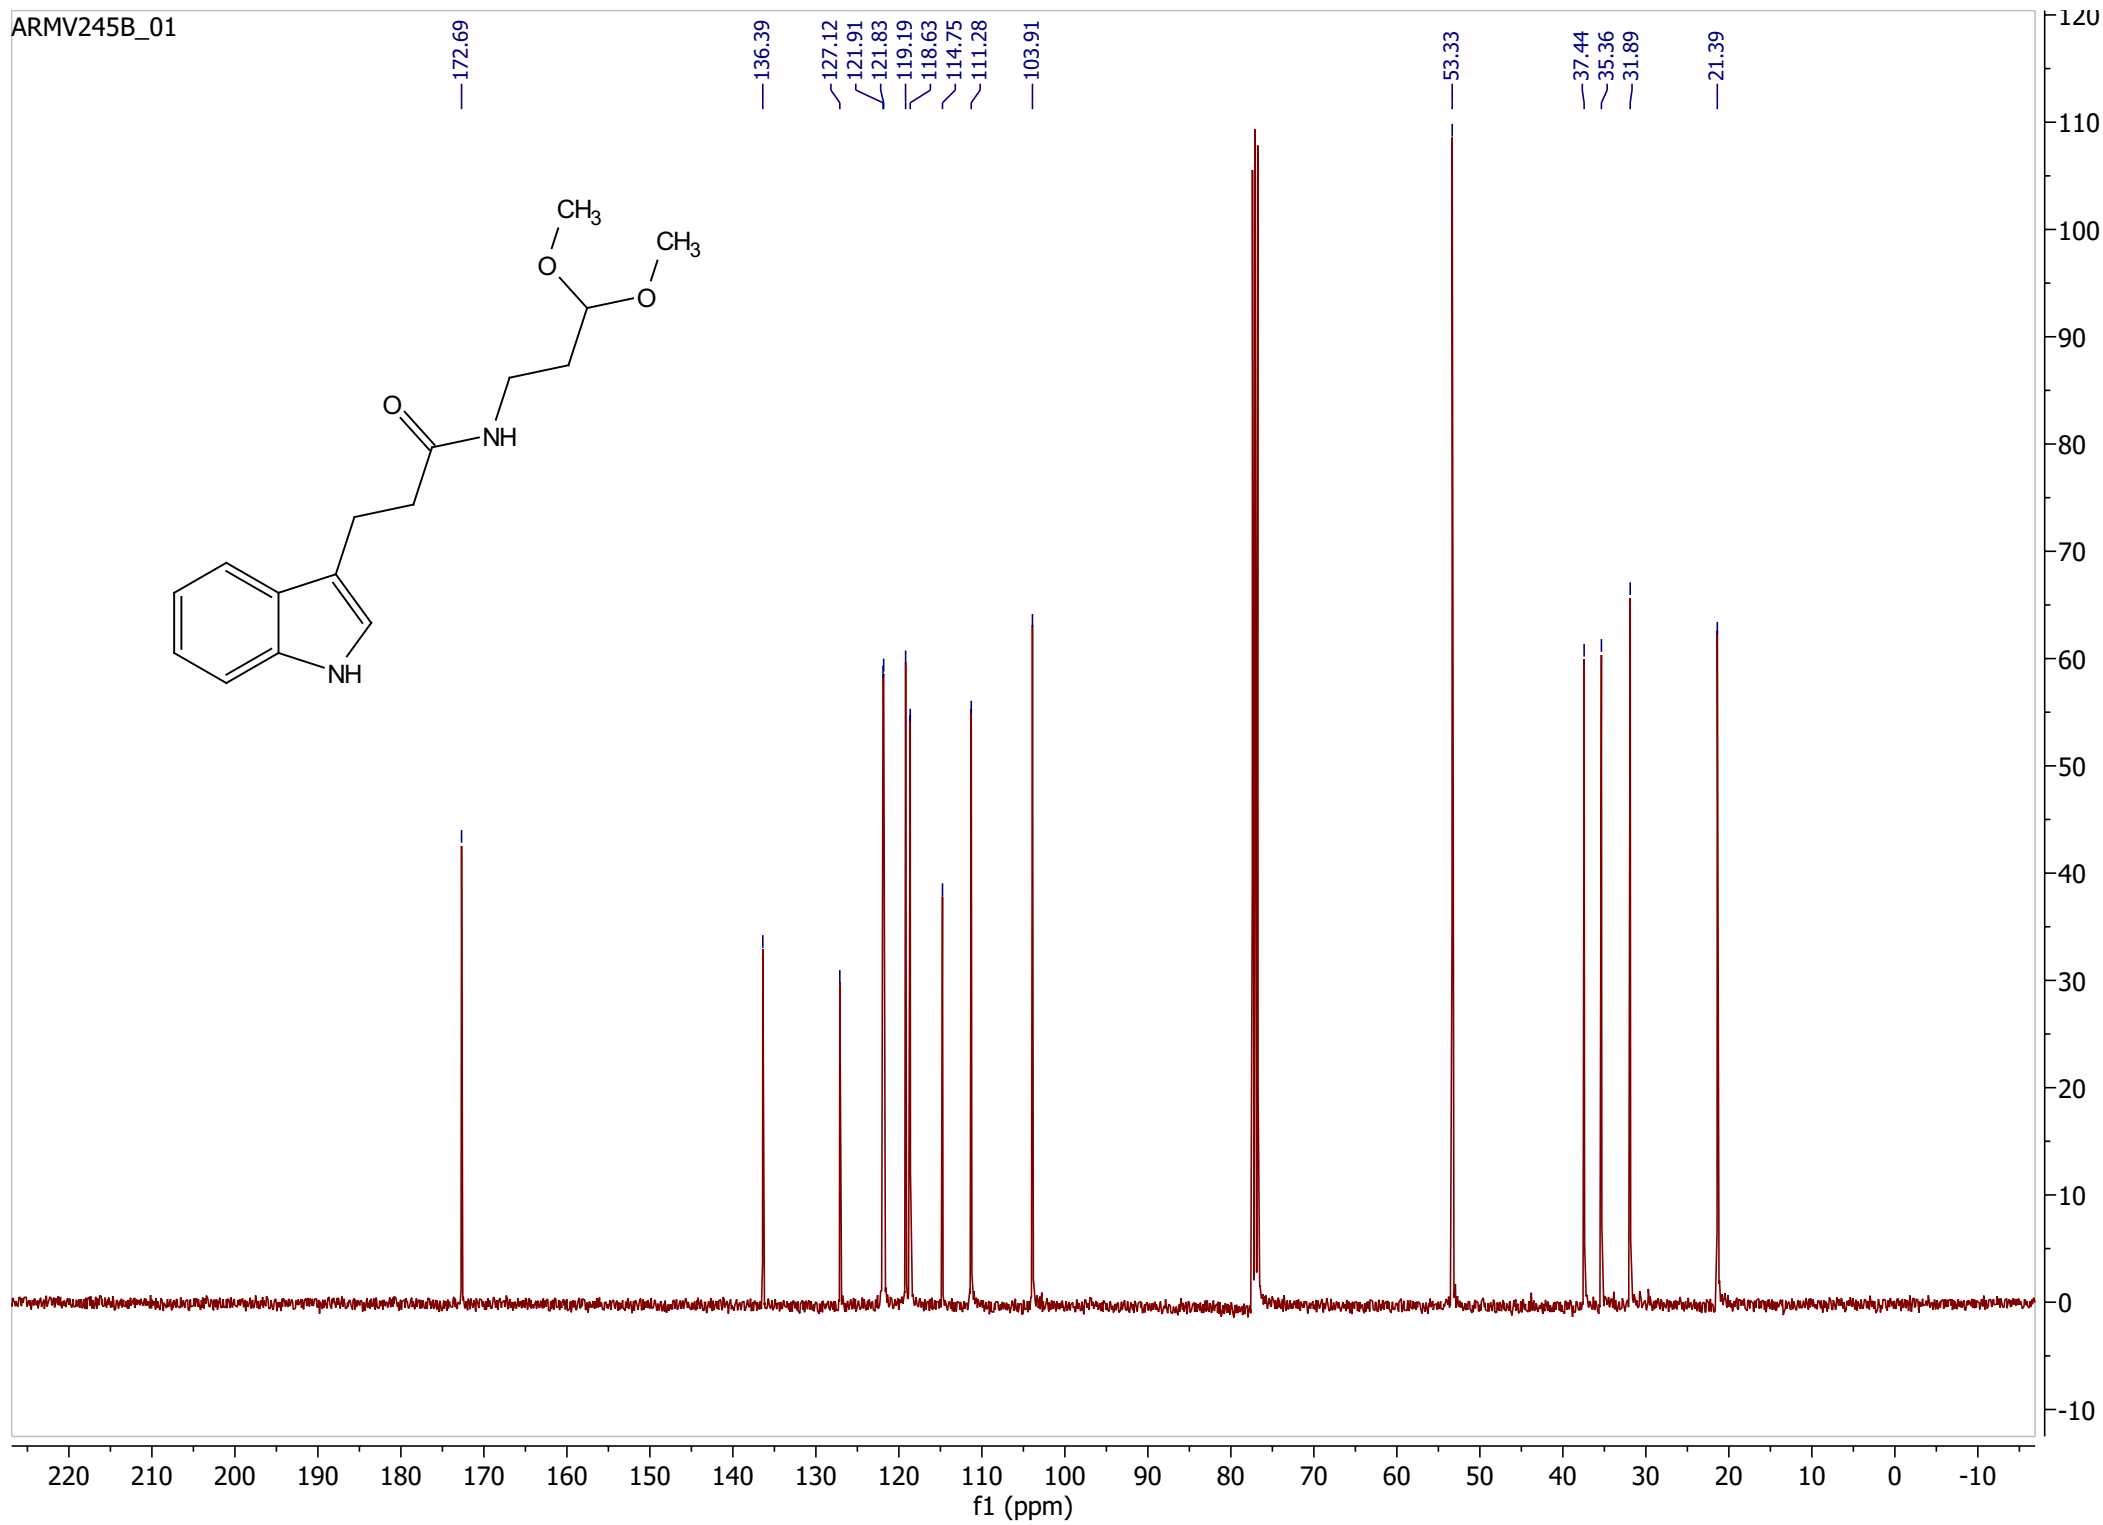

ARMV254\_01

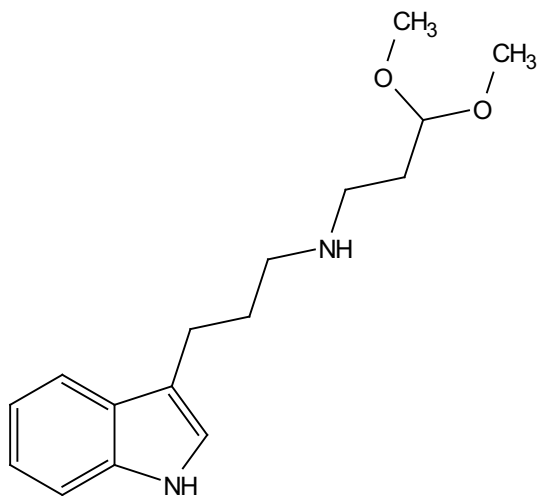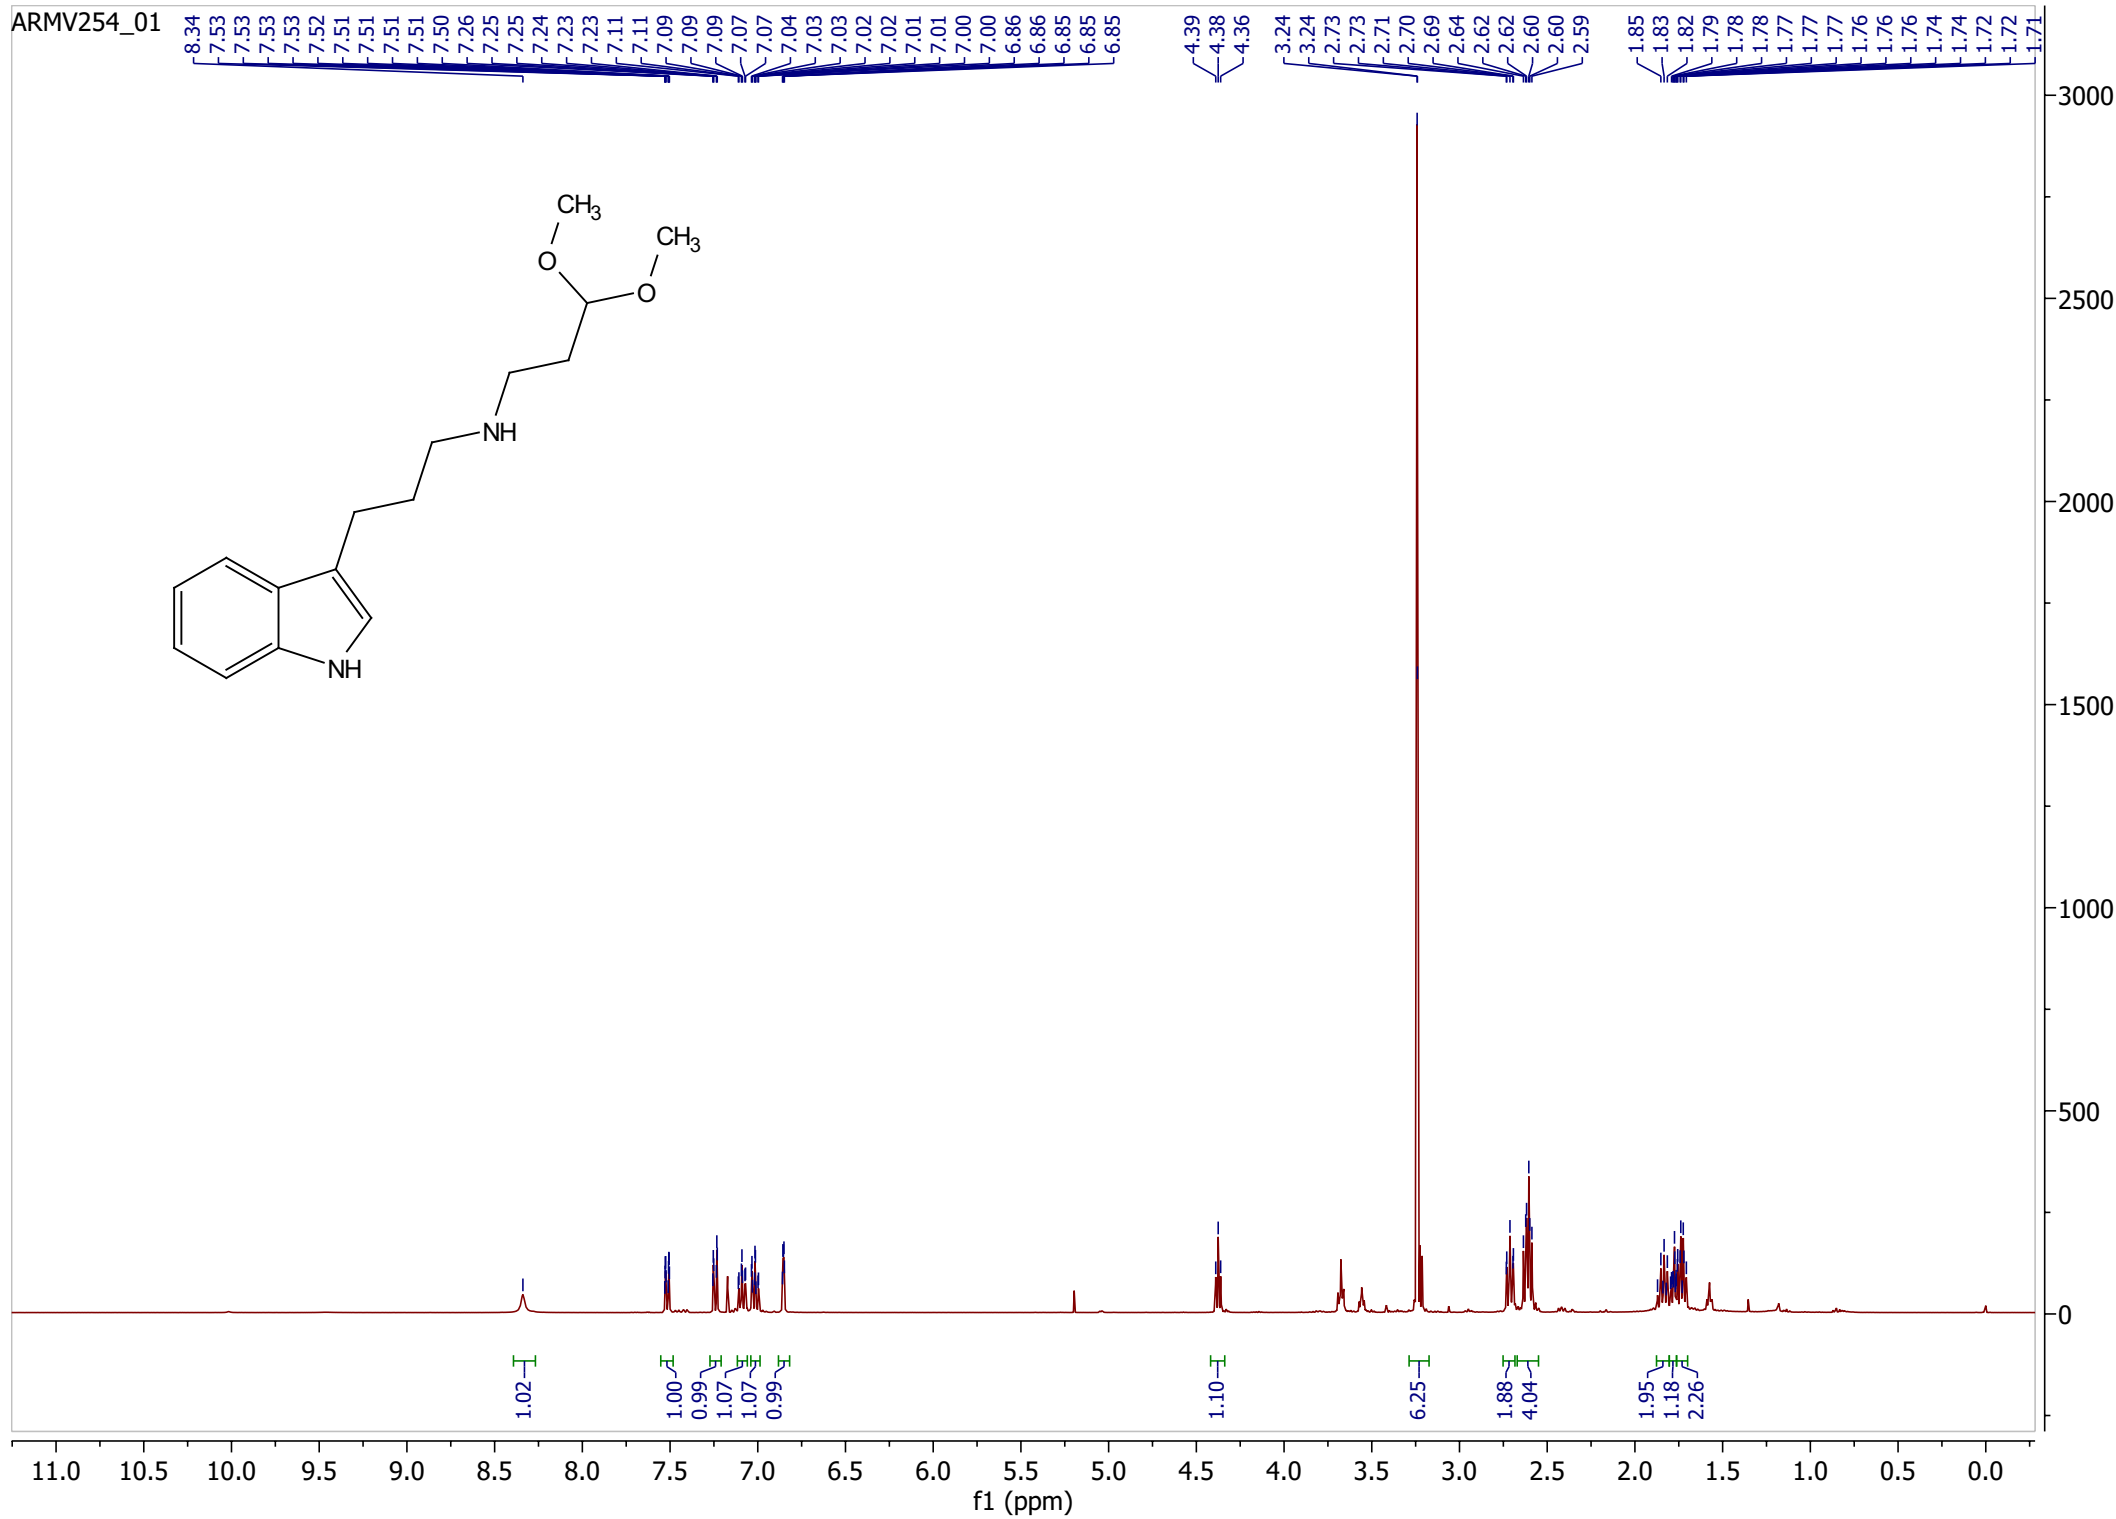

ARMV254carb\_01 1

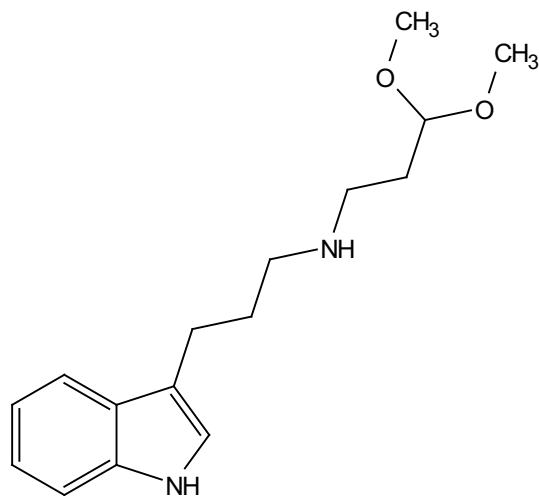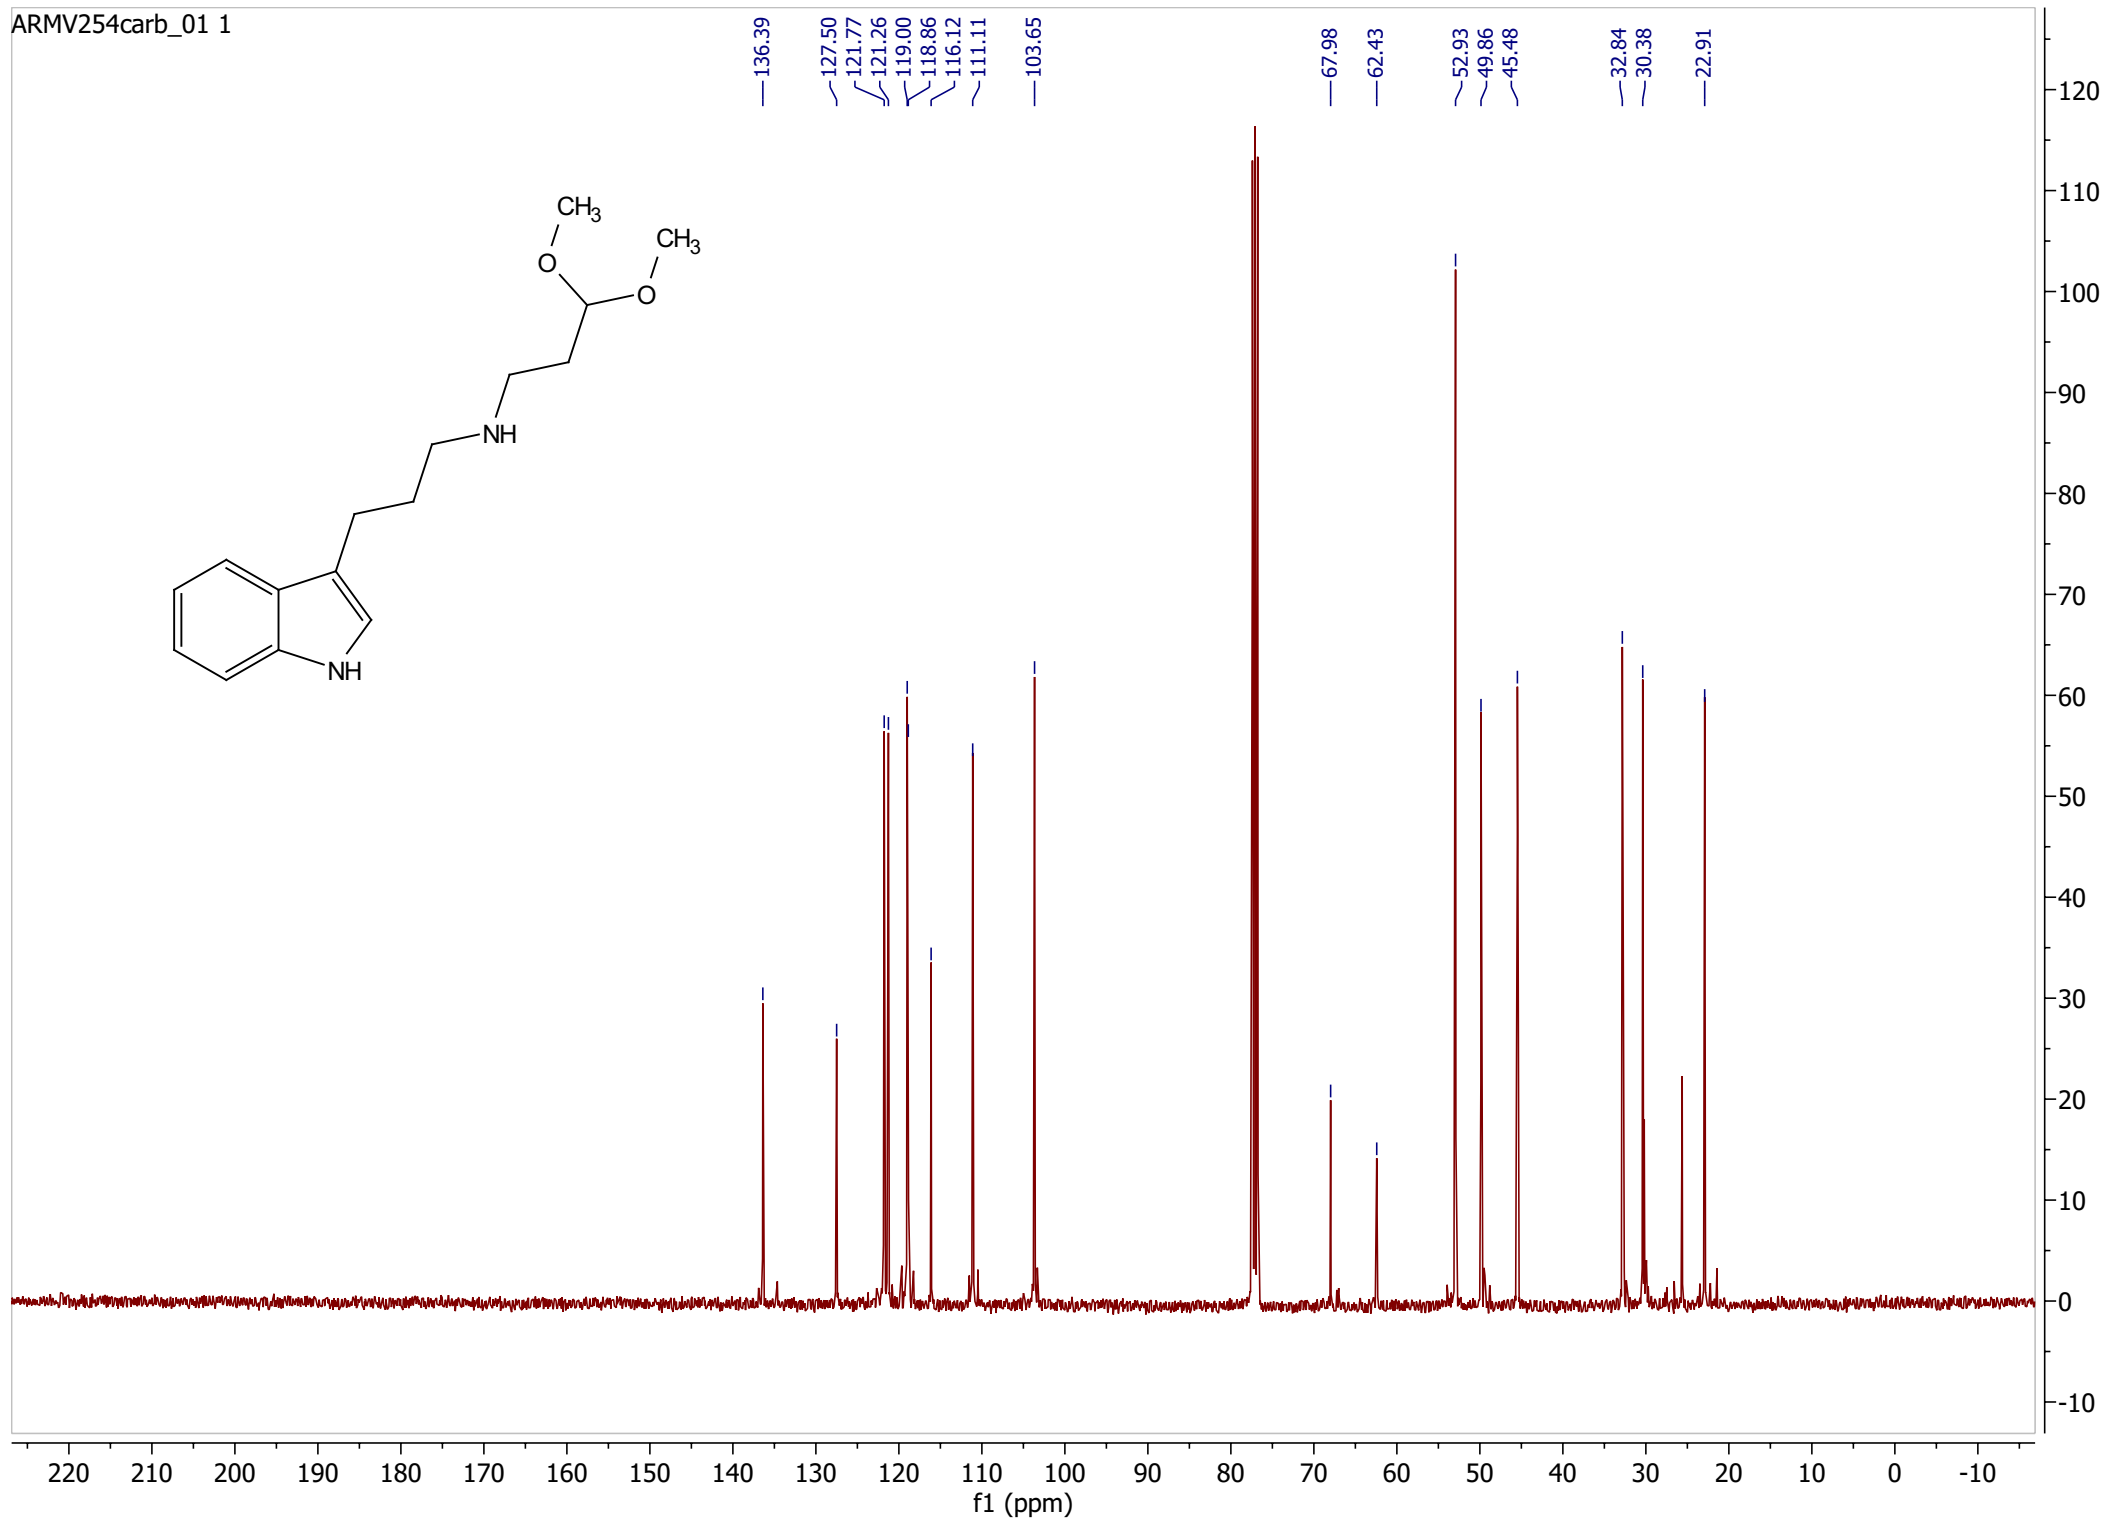



ARMV257A  
STANDARD 1H OBSERVE

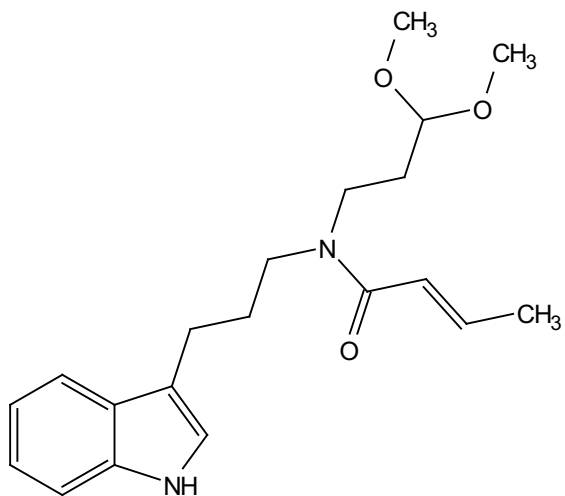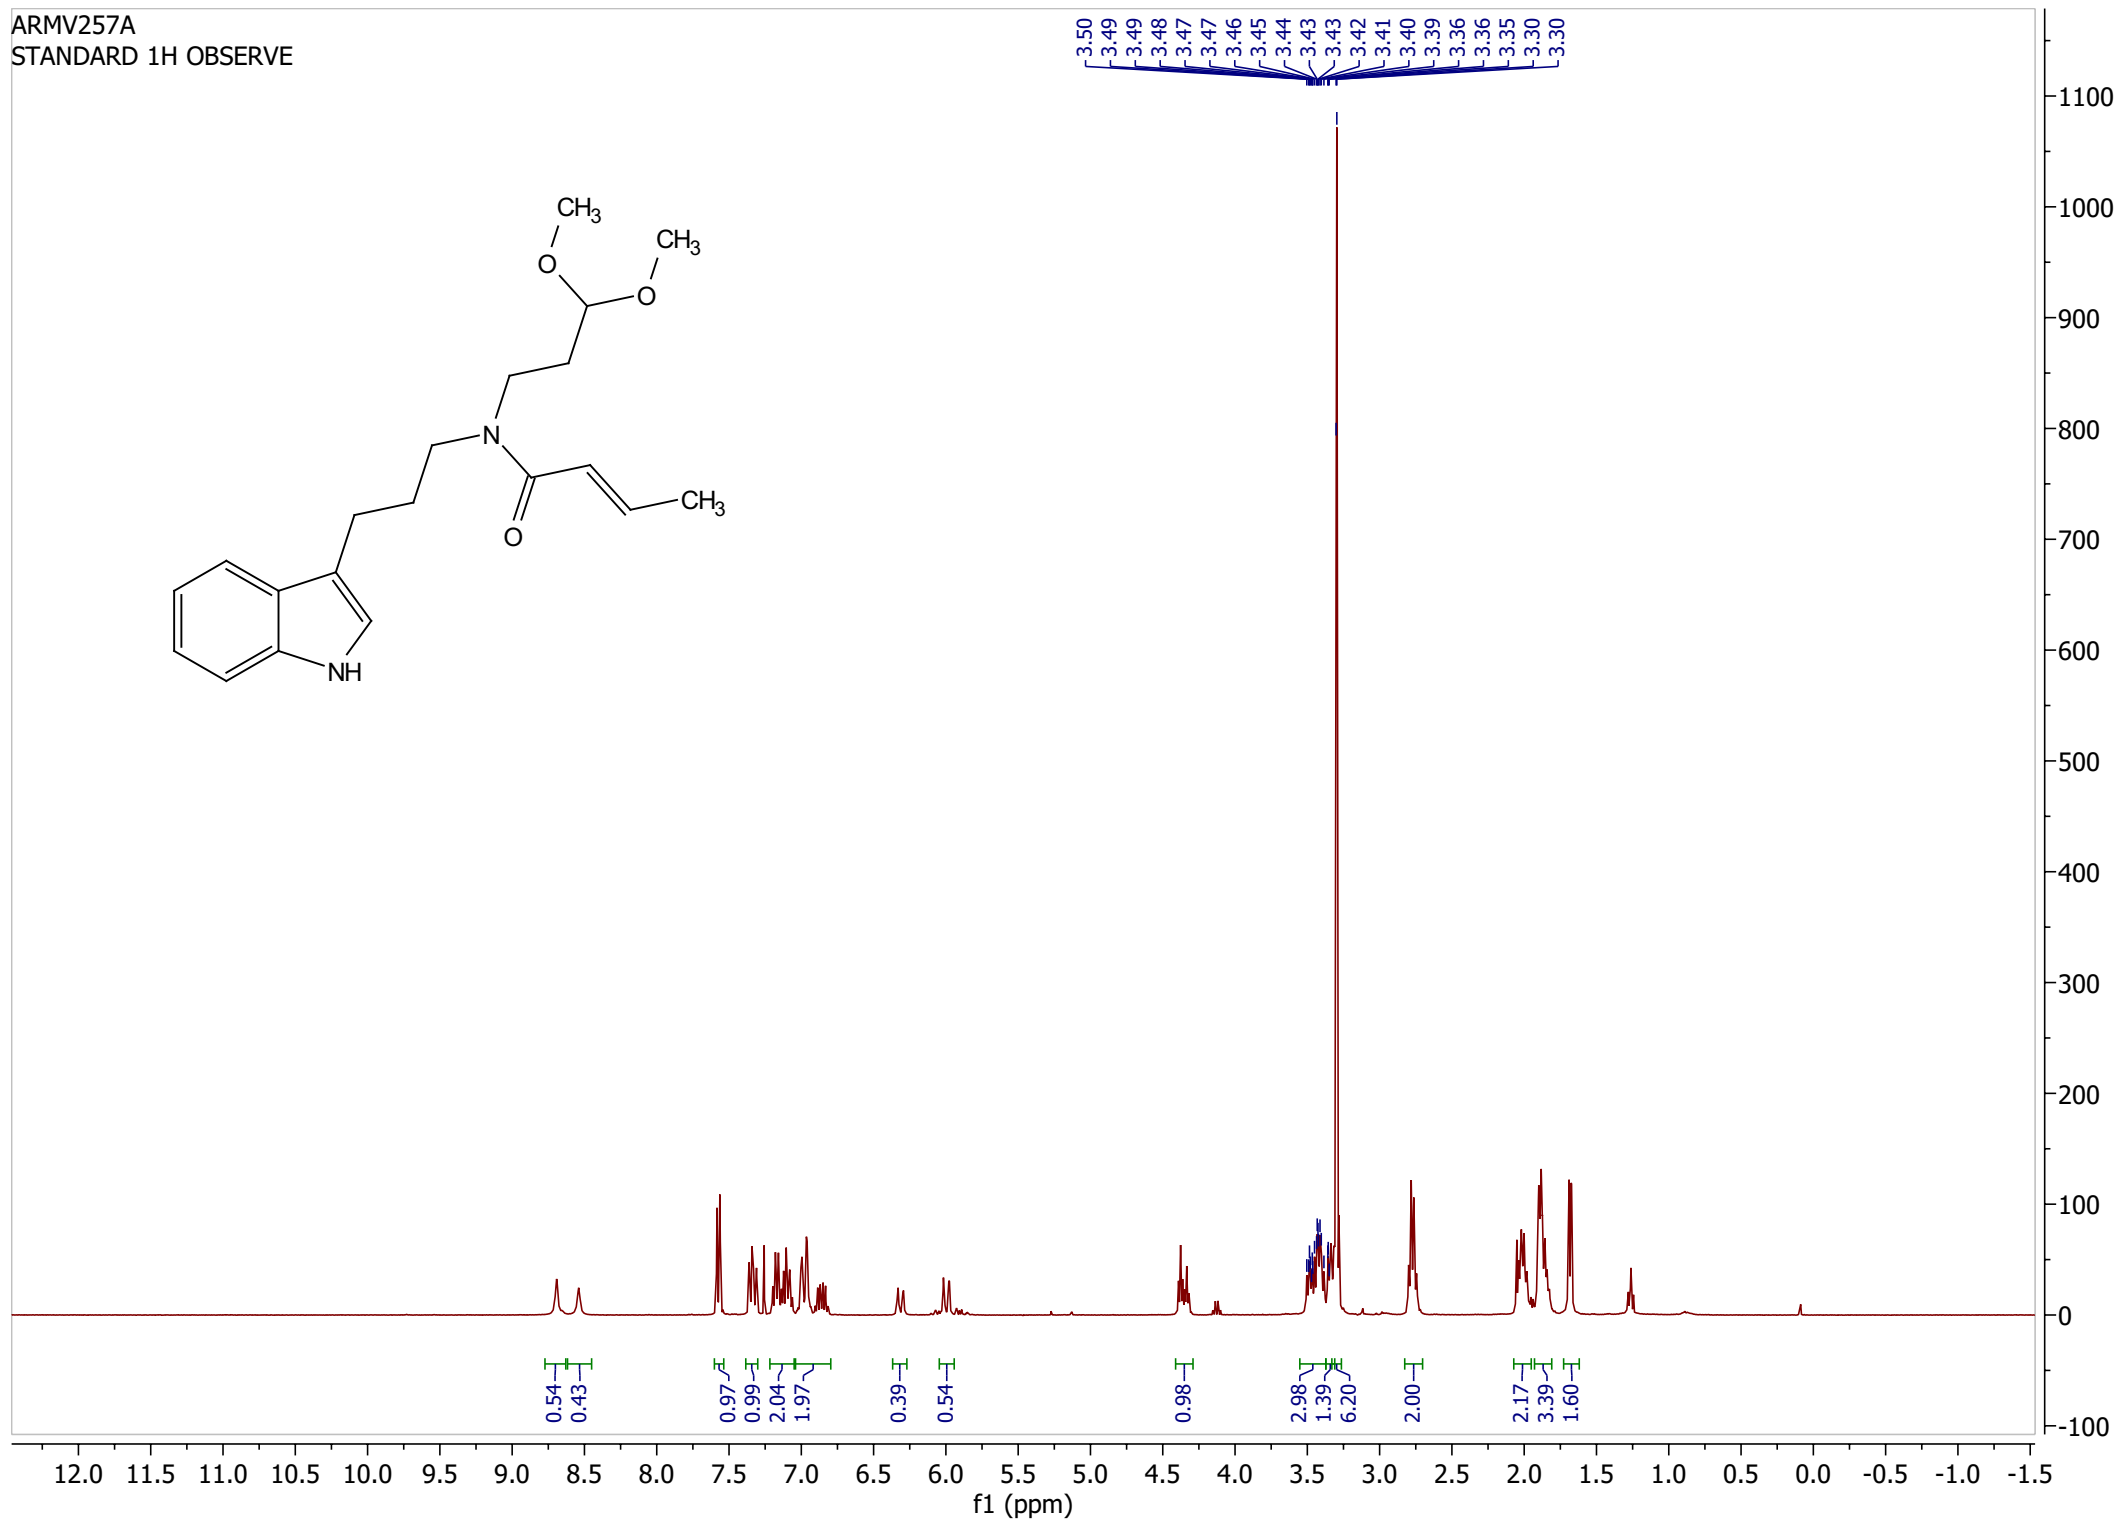

ARMV257carb\_01

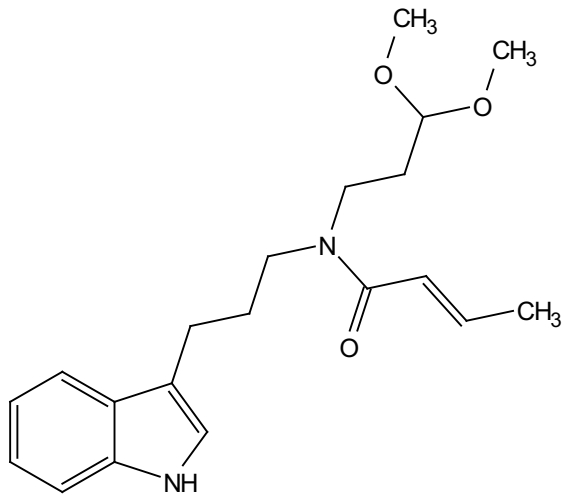

166.50  
166.45  
141.82  
141.50  
136.58  
136.44  
127.42  
127.18  
121.92  
121.81  
121.65  
121.56  
119.16  
118.91  
118.70  
118.65  
115.37  
114.57  
111.36  
111.20  
102.89  
102.23

53.25  
53.05  
53.00  
48.05  
46.47  
43.57  
42.95  
32.56  
31.00  
29.60  
28.00  
22.61  
22.34  
18.28  
18.02

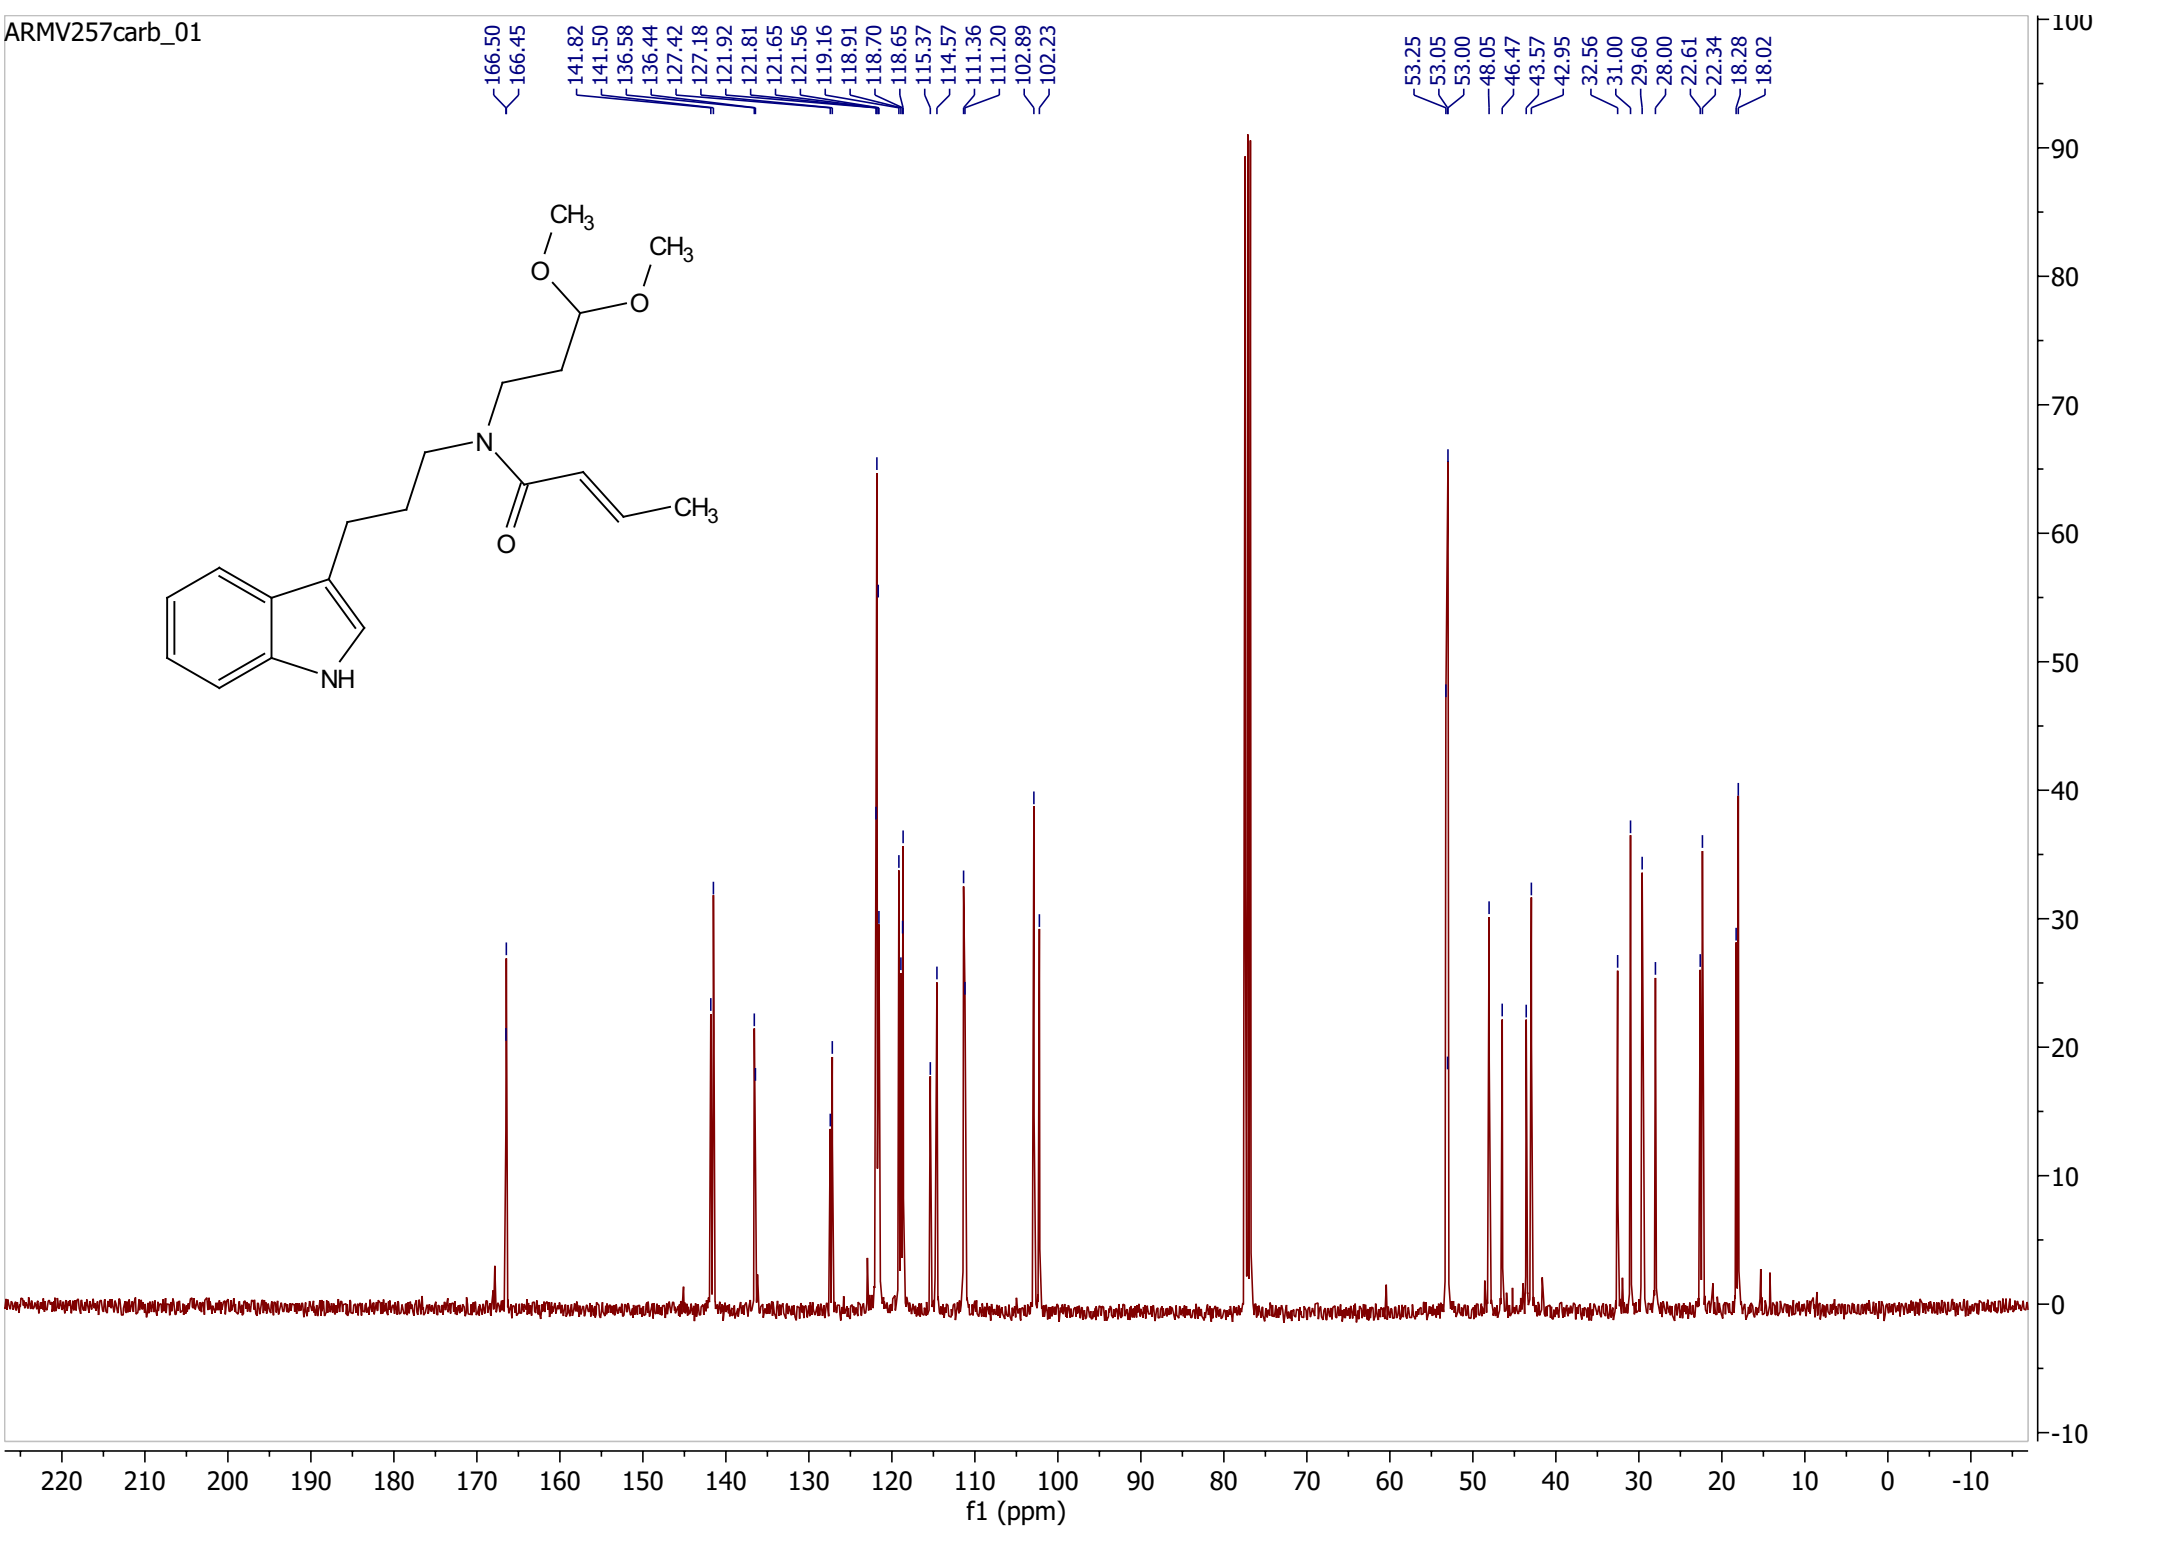

ARMV264a\_01

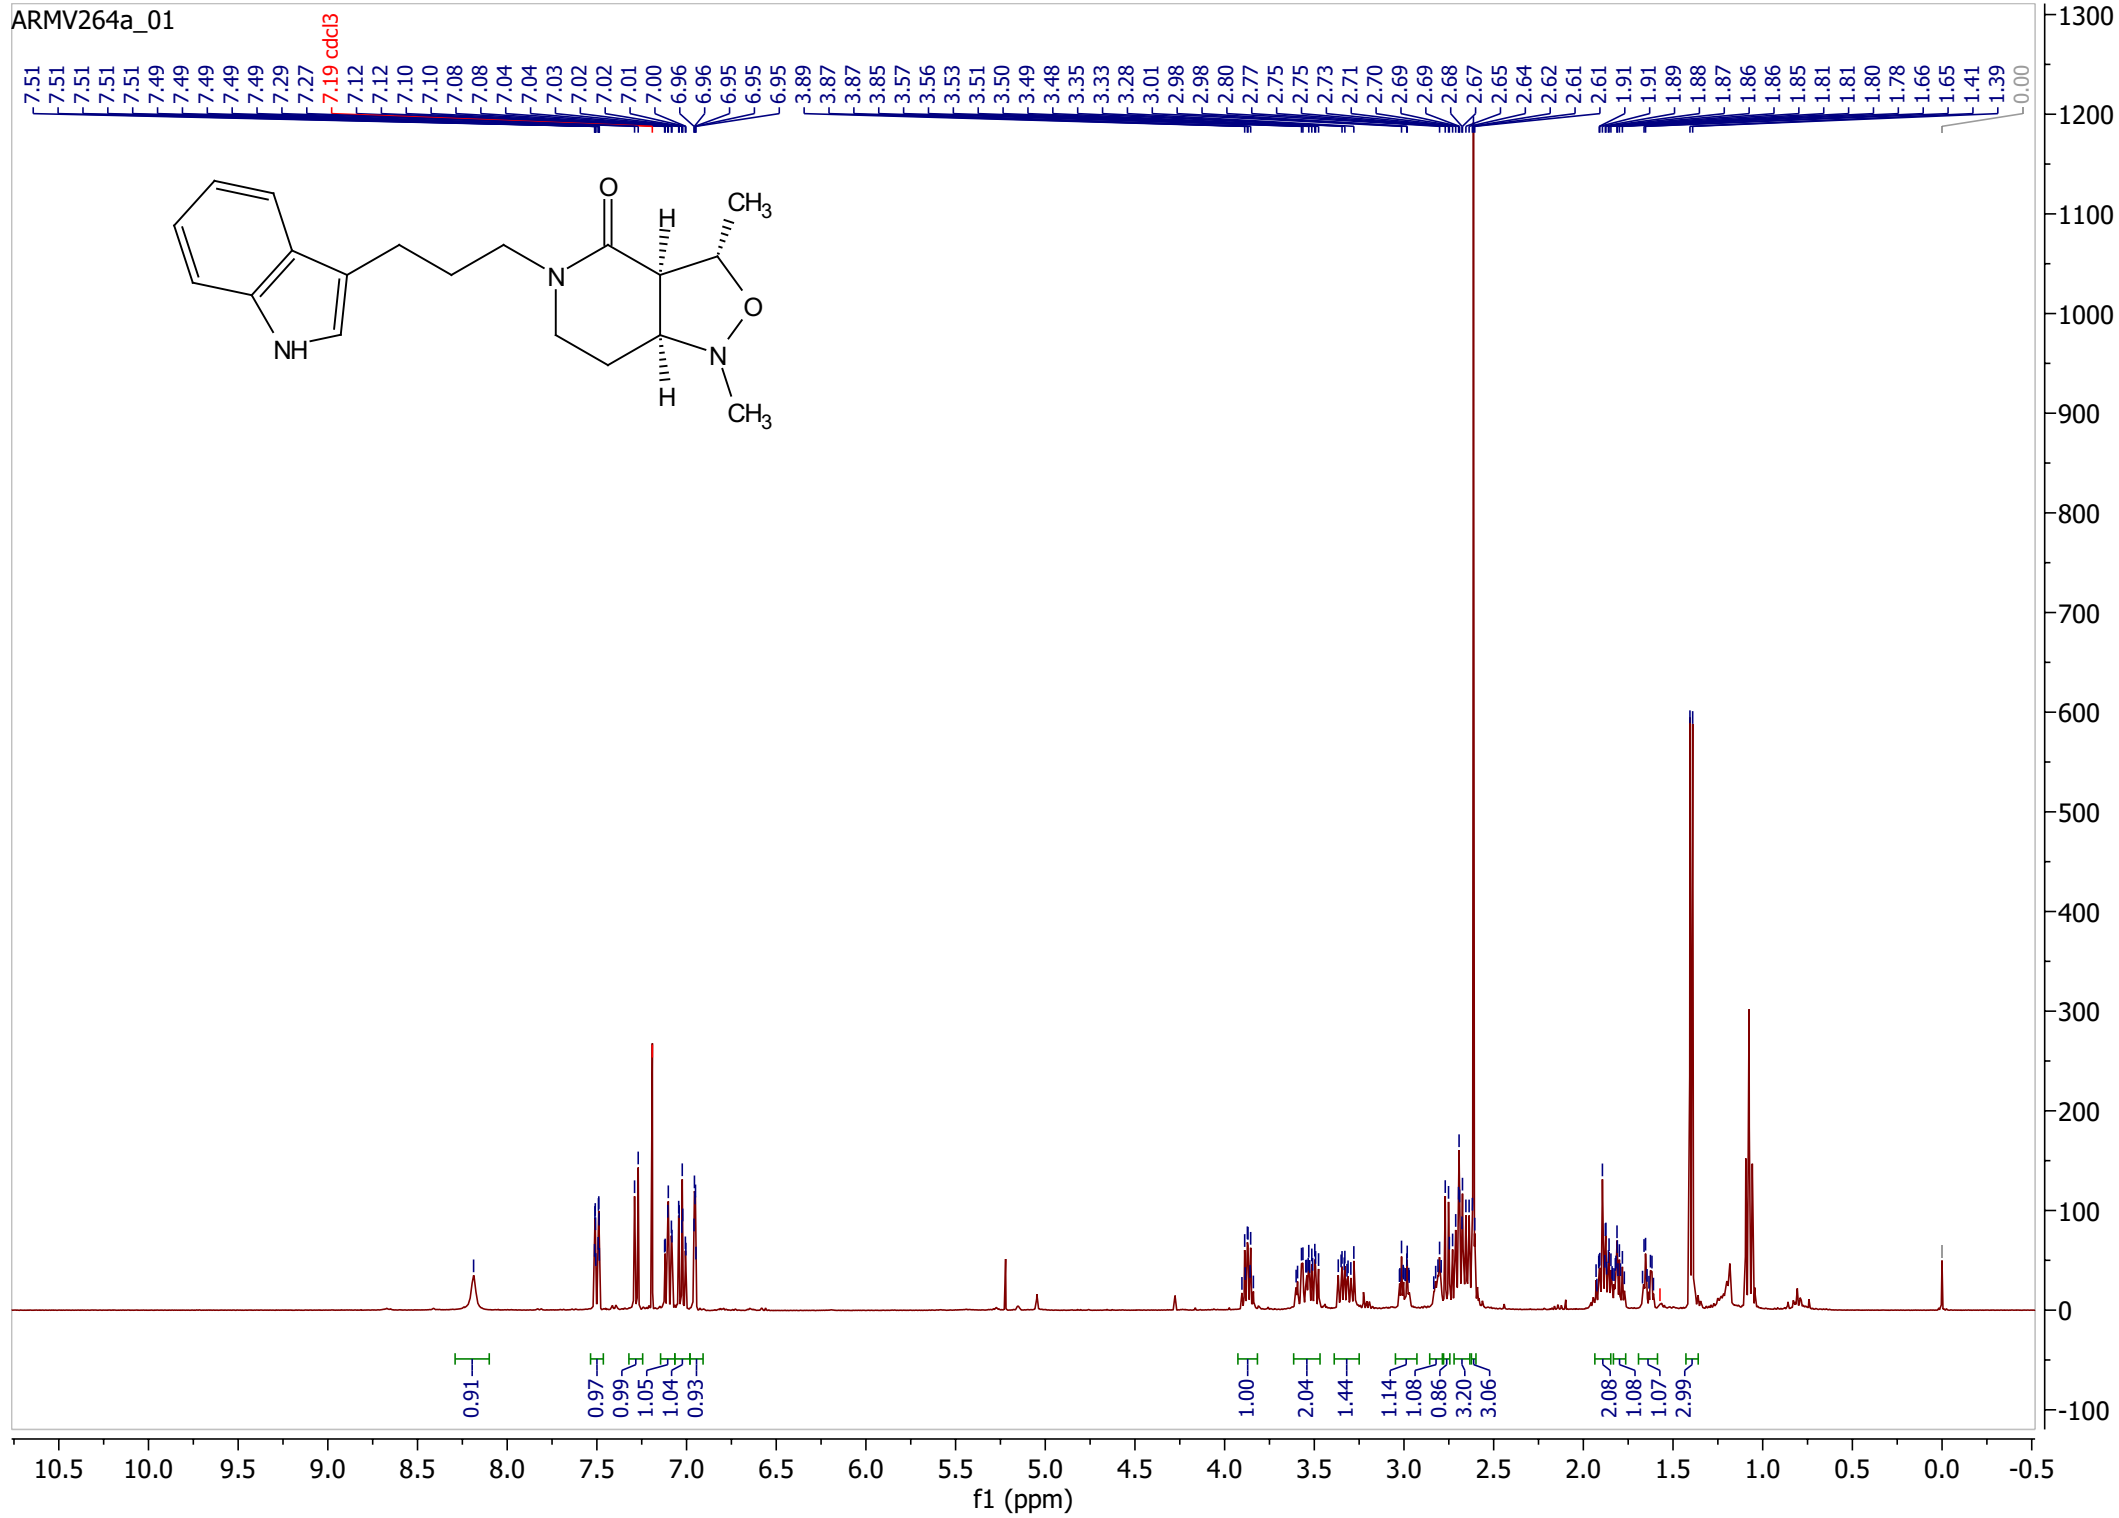

ARMV264a\_02

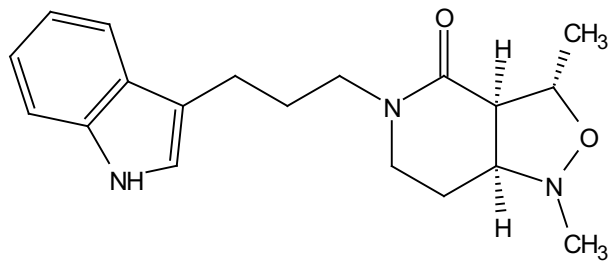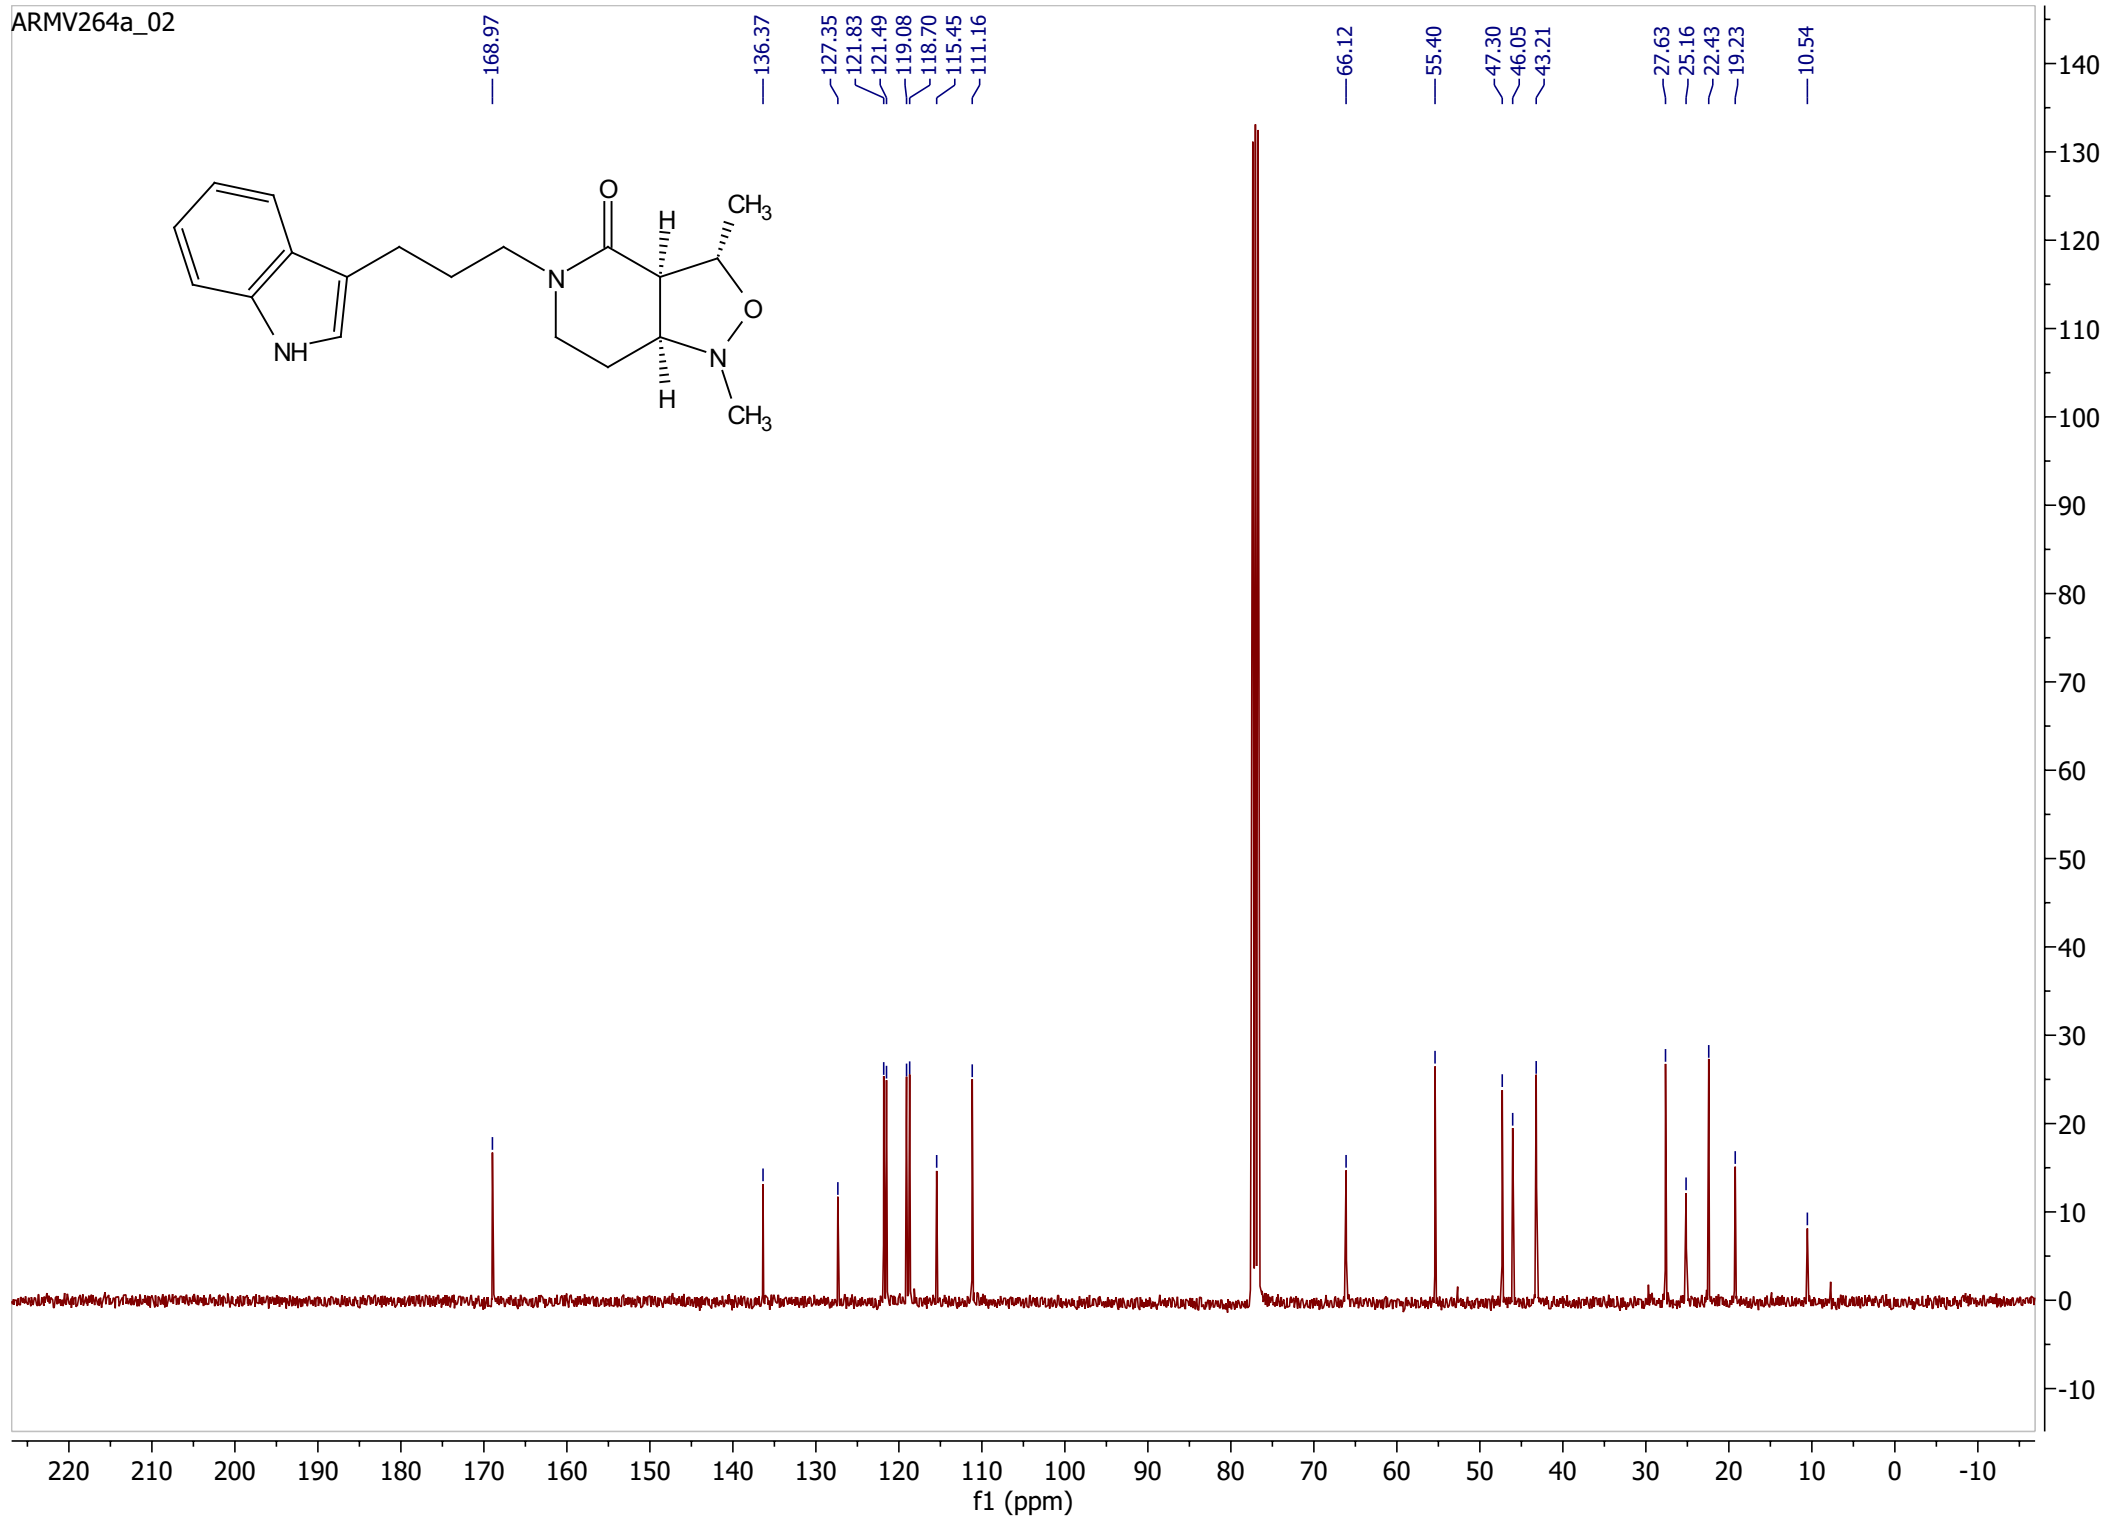

army29 f1  
army29 f1

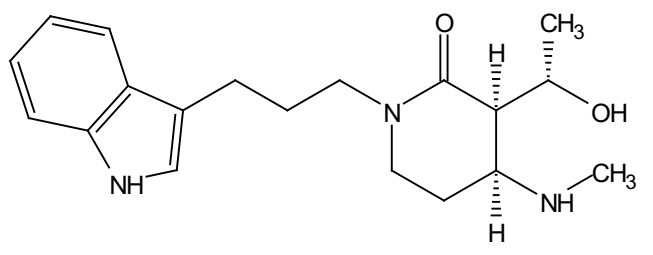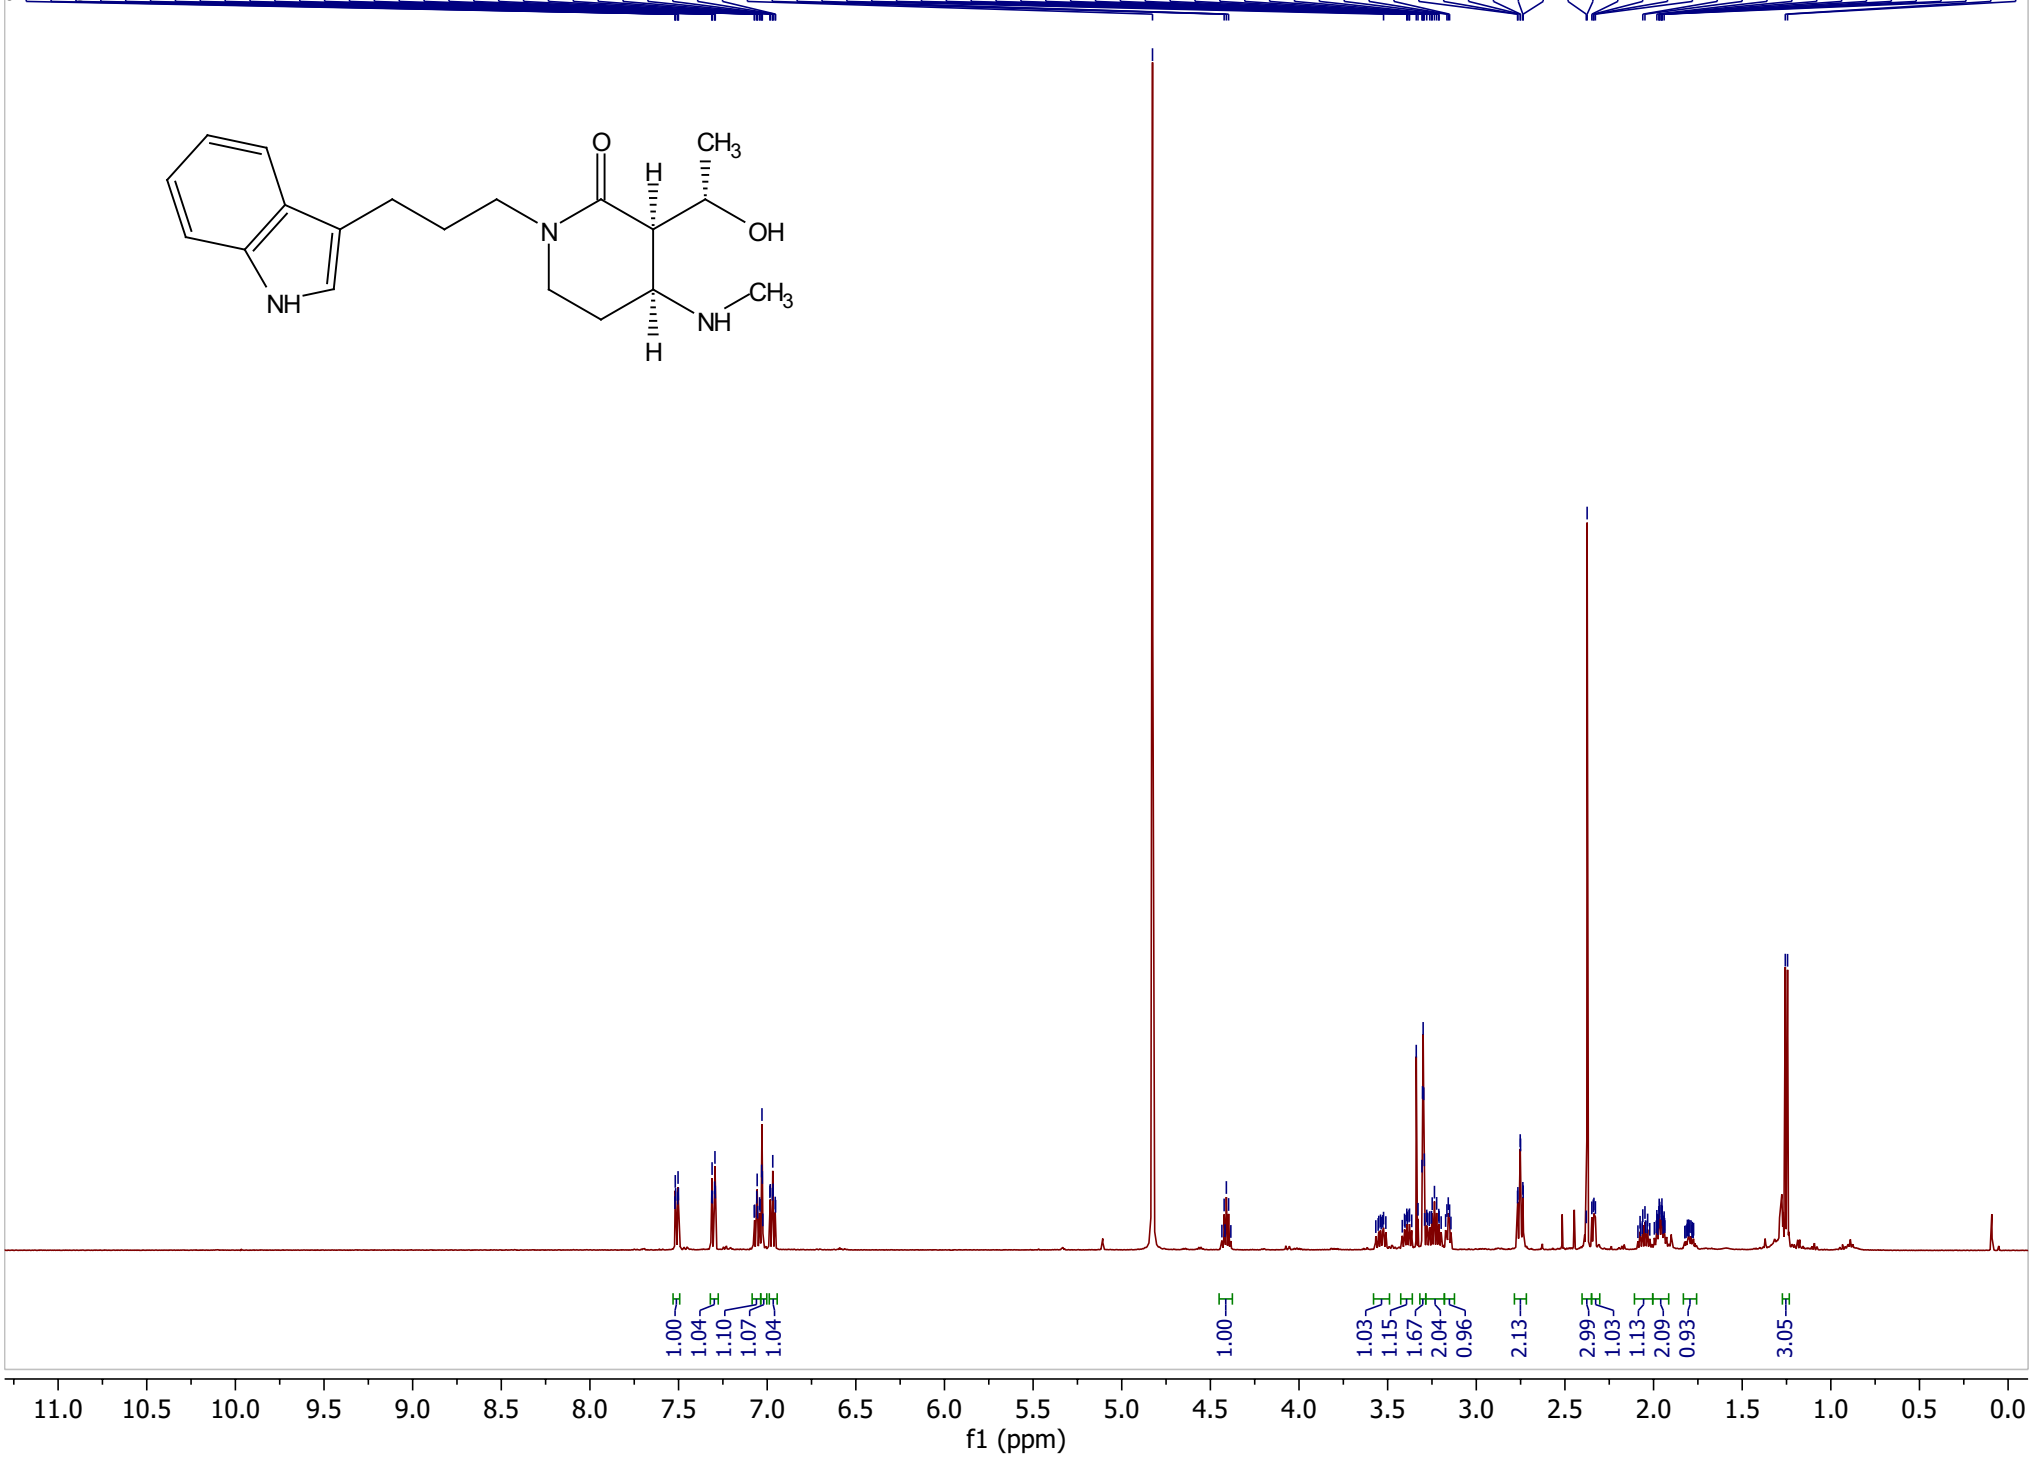

11.0 10.5 10.0 9.5 9.0 8.5 8.0 7.5 7.0 6.5 6.0 5.5 5.0 4.5 4.0 3.5 3.0 2.5 2.0 1.5 1.0 0.5 0.0

f1 (ppm)

armv291\_c13  
armv291

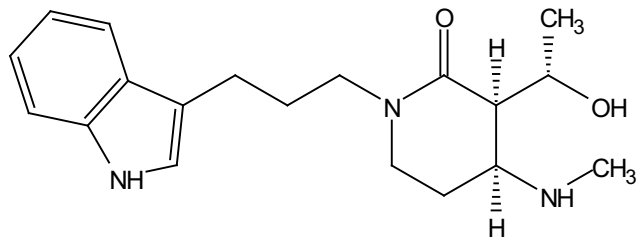

—171.24

—138.21

—128.73

122.81

122.21

119.41

119.35

115.70

112.17

—67.43

—56.08

—51.41

—44.97

—33.71

28.44

25.18

23.69

—22.31

220 210 200 190 180 170 160 150 140 130 120 110 100 90 80 70 60 50 40 30 20 10 0 -10

f1 (ppm)

7000  
6500  
6000  
5500  
5000  
4500  
4000  
3500  
3000  
2500  
2000  
1500  
1000  
500  
0  
-500

APRM156A-01

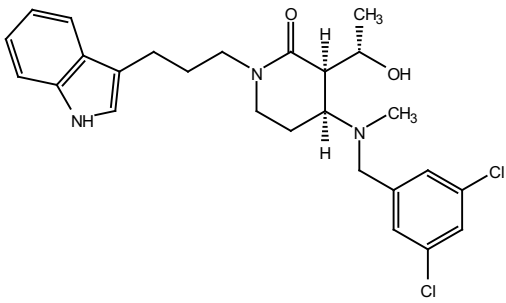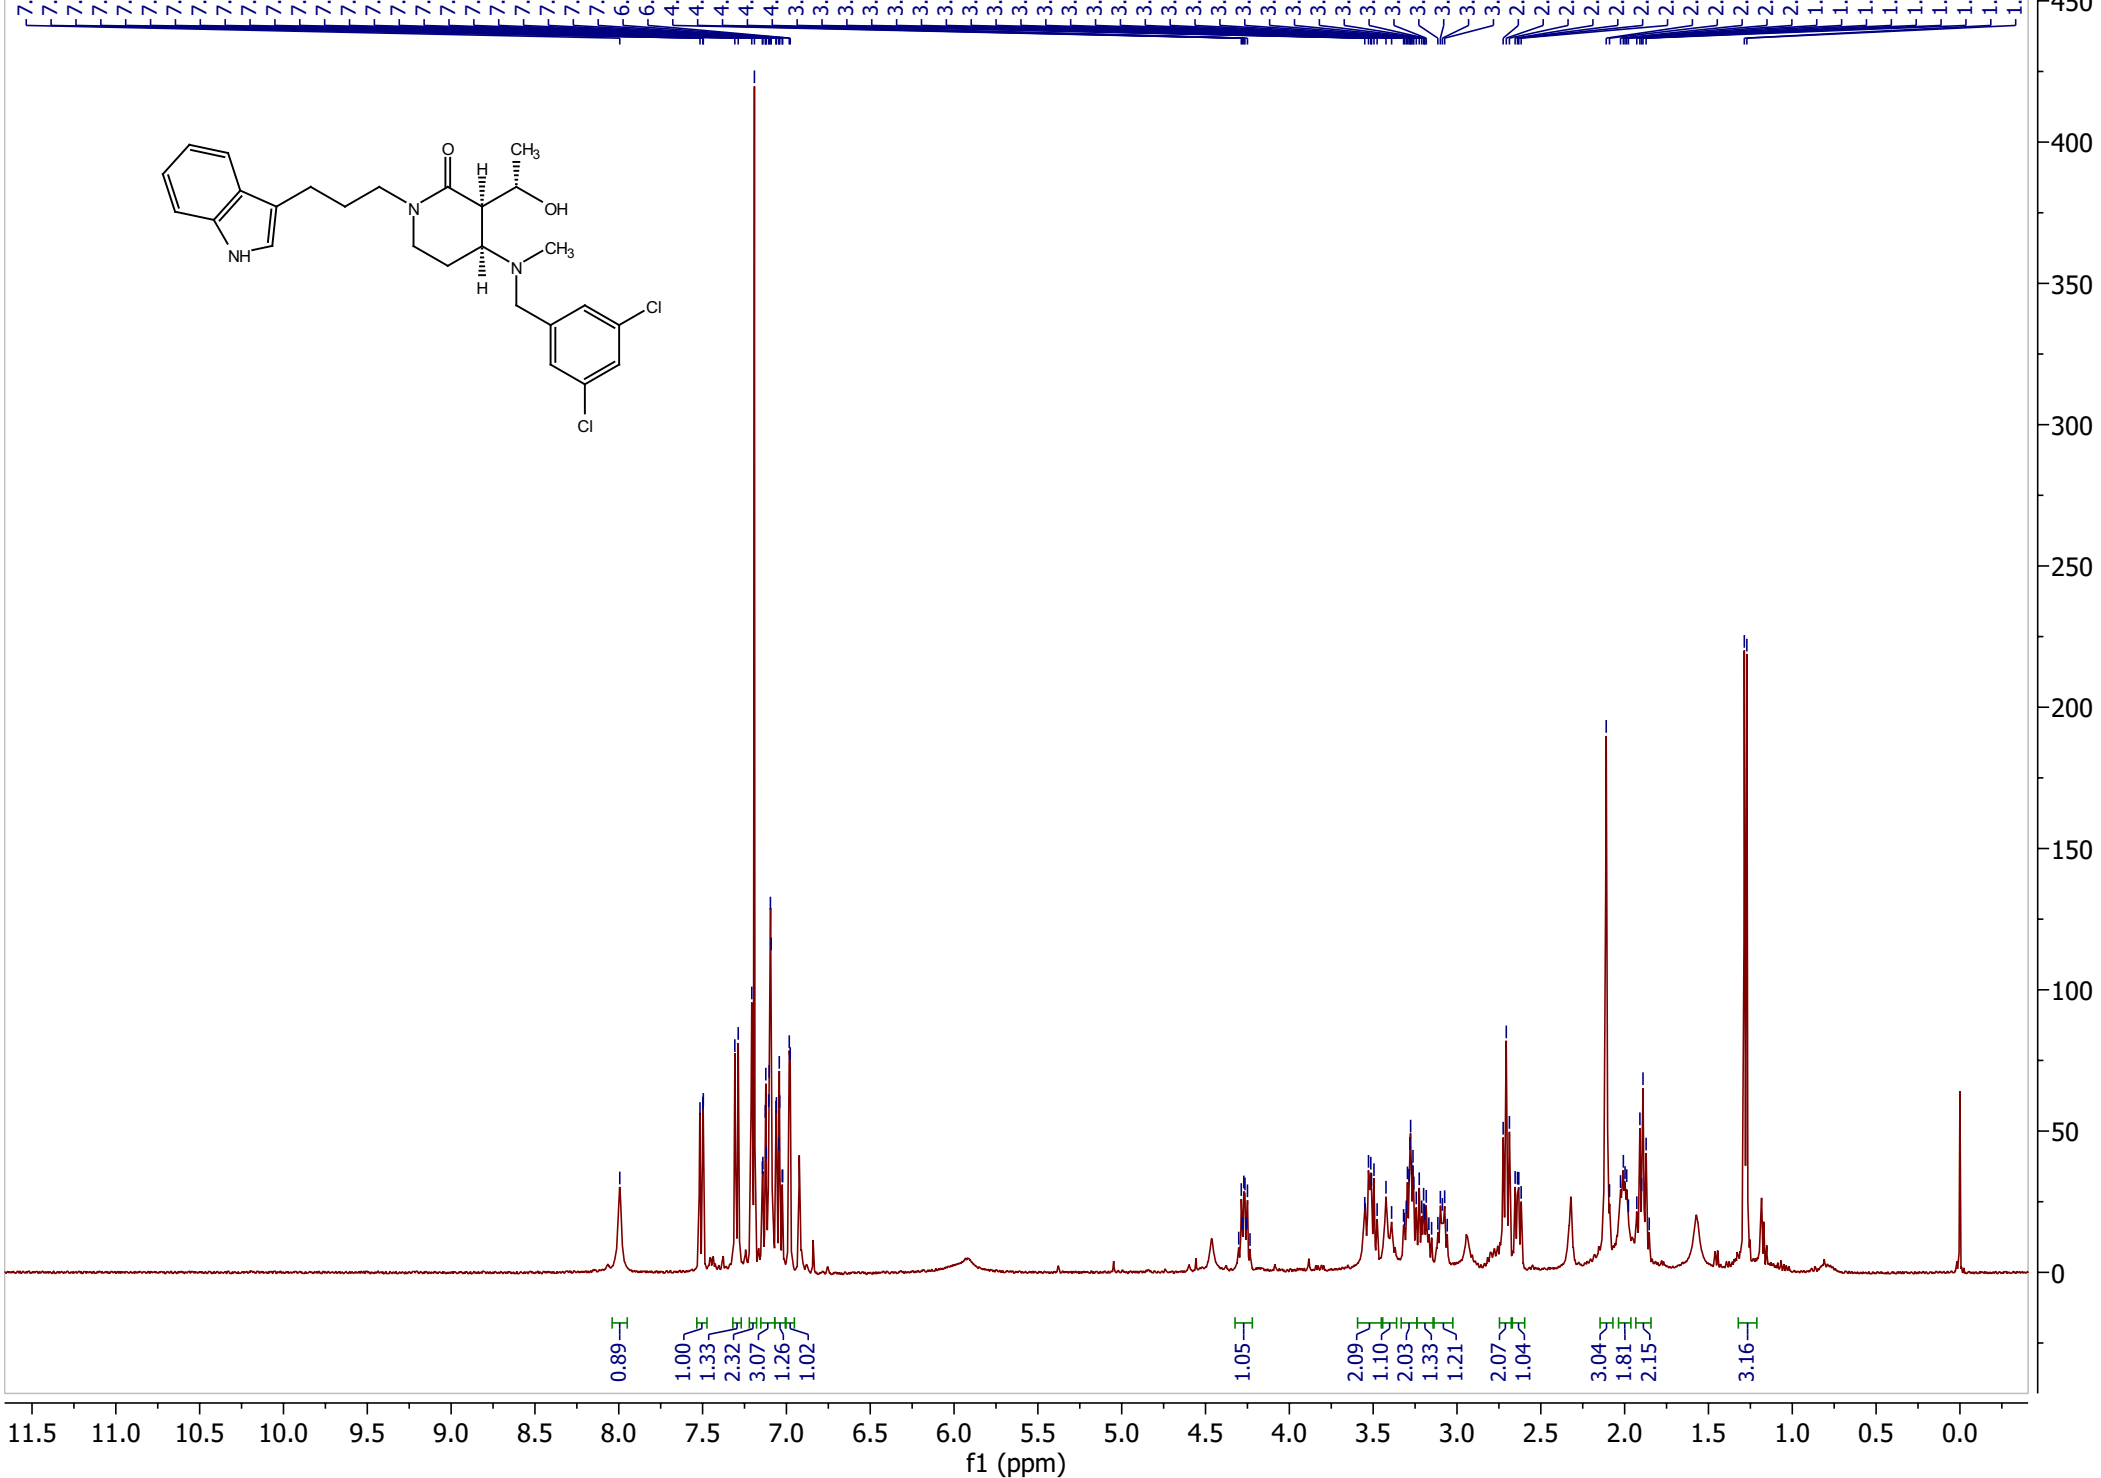

ARMVI56B\_02

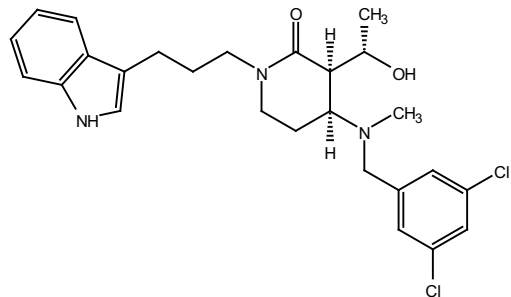

169.92

141.20  
136.35  
135.20  
127.84  
127.33  
127.16  
121.96  
121.43  
119.21  
118.68  
115.45  
111.18

66.47  
60.33  
57.86  
50.18  
46.64  
44.90  
38.56  
27.52  
22.50  
21.86

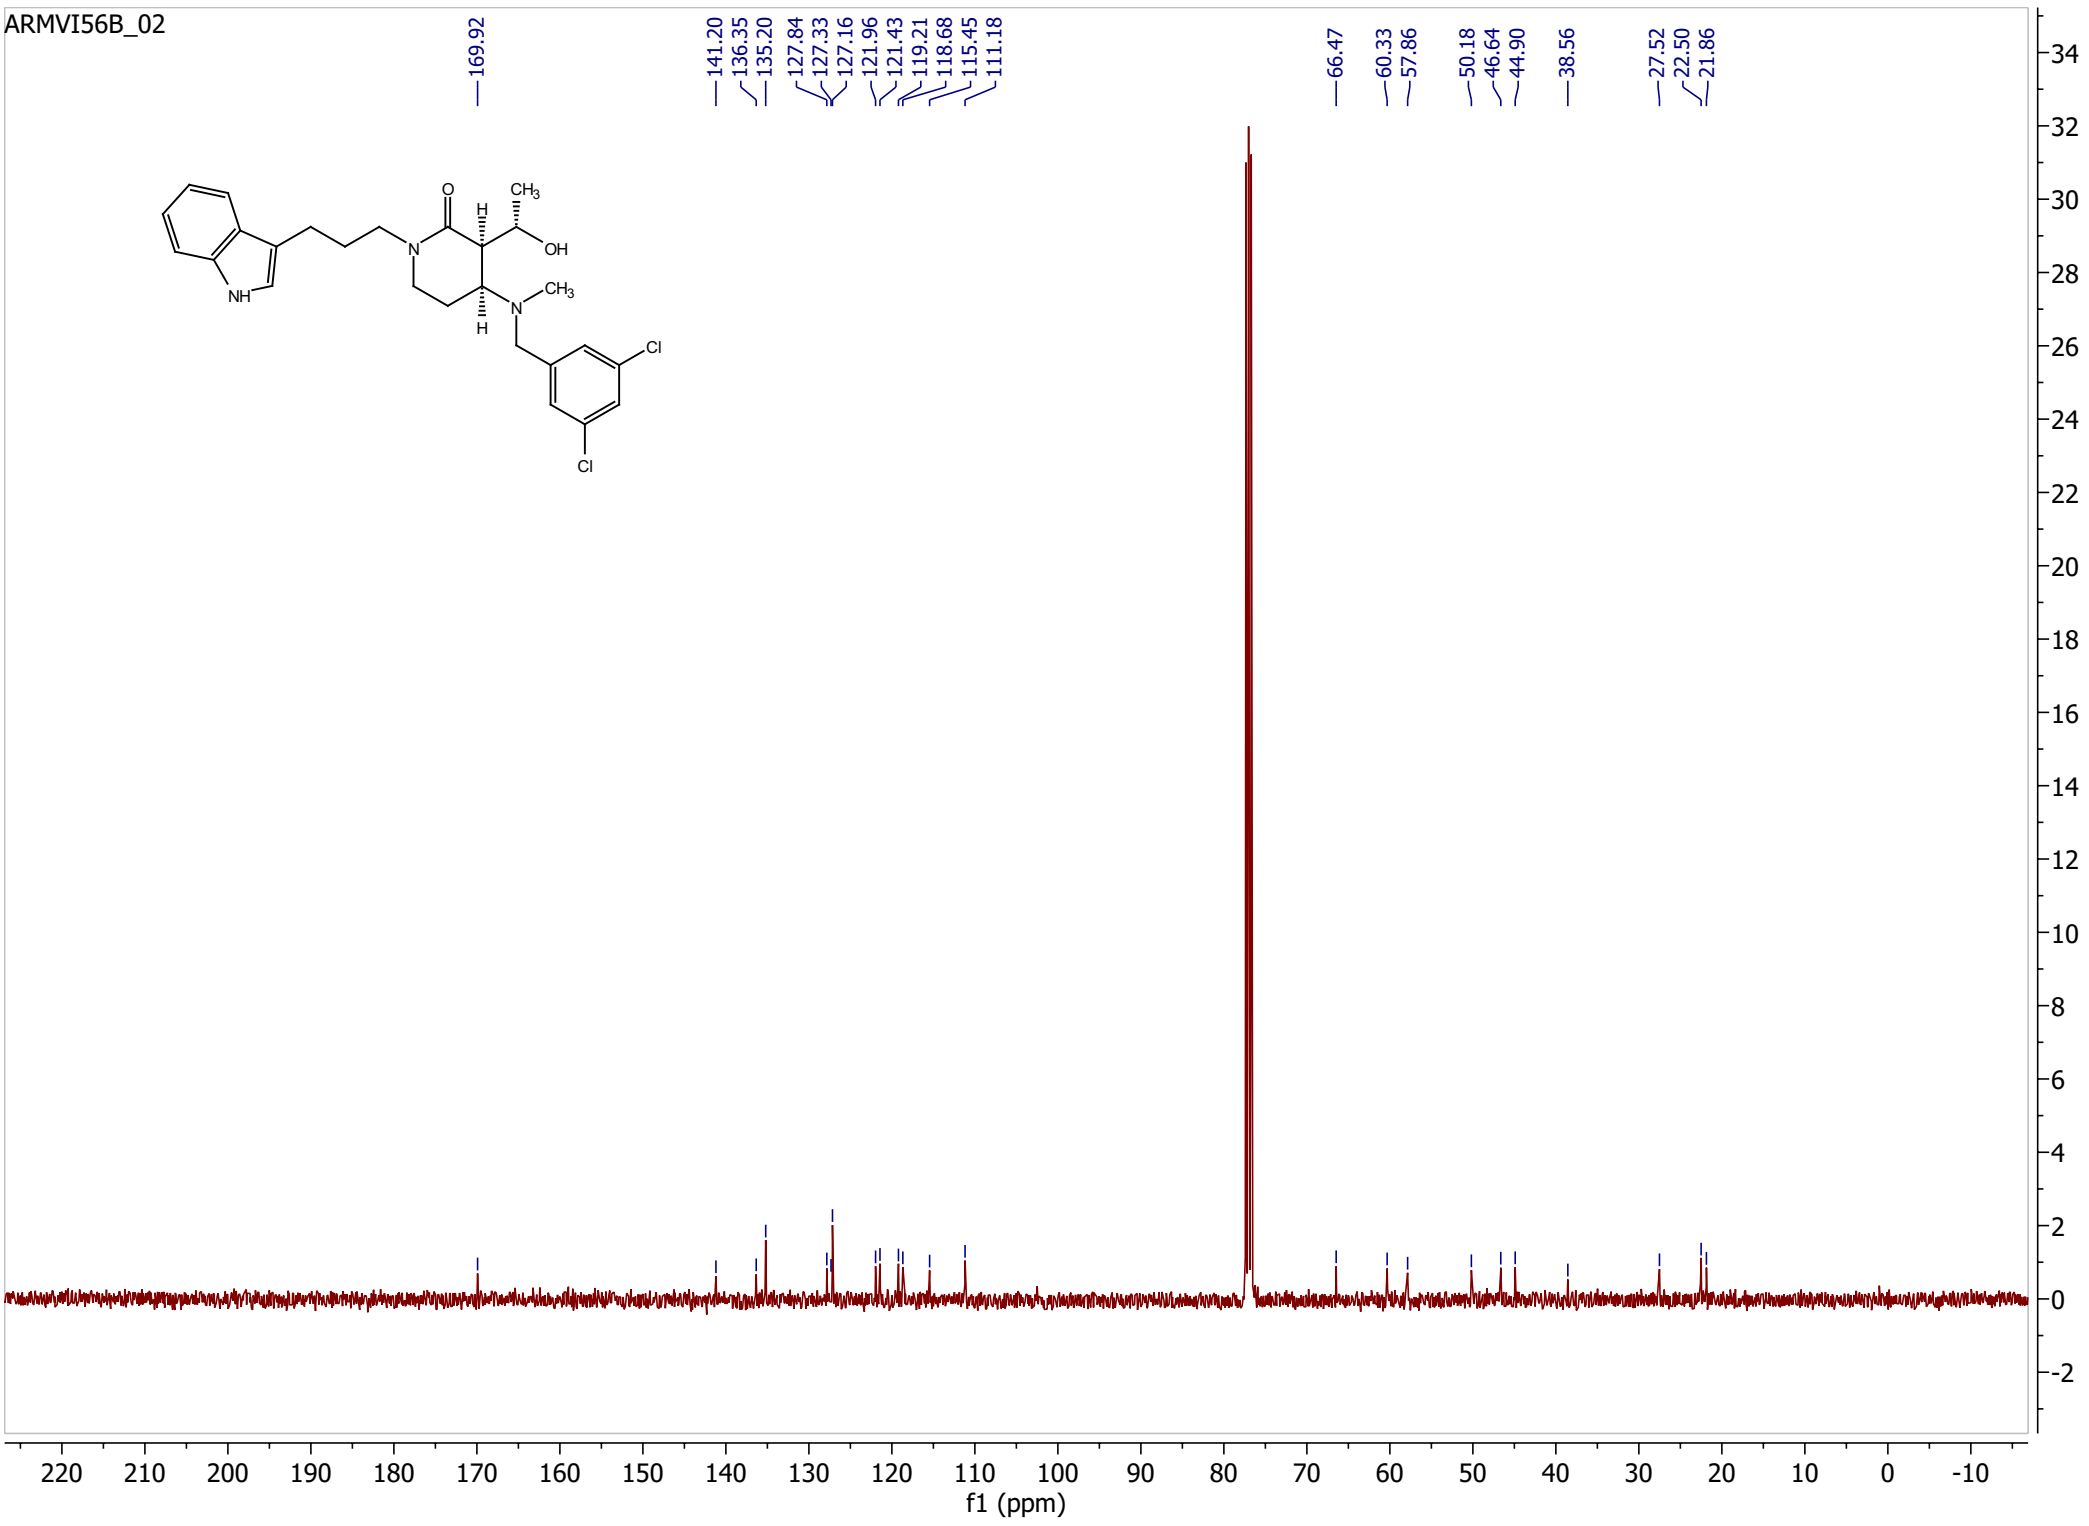



ARMV236  
STANDARD 1H OBSERVE

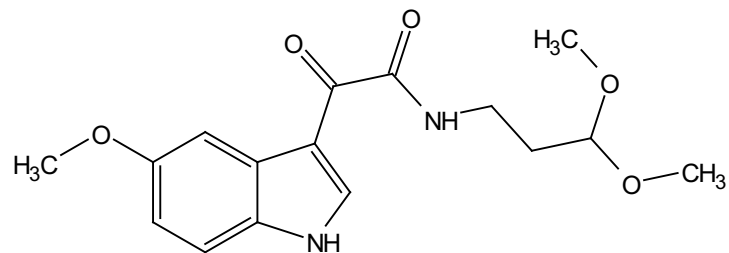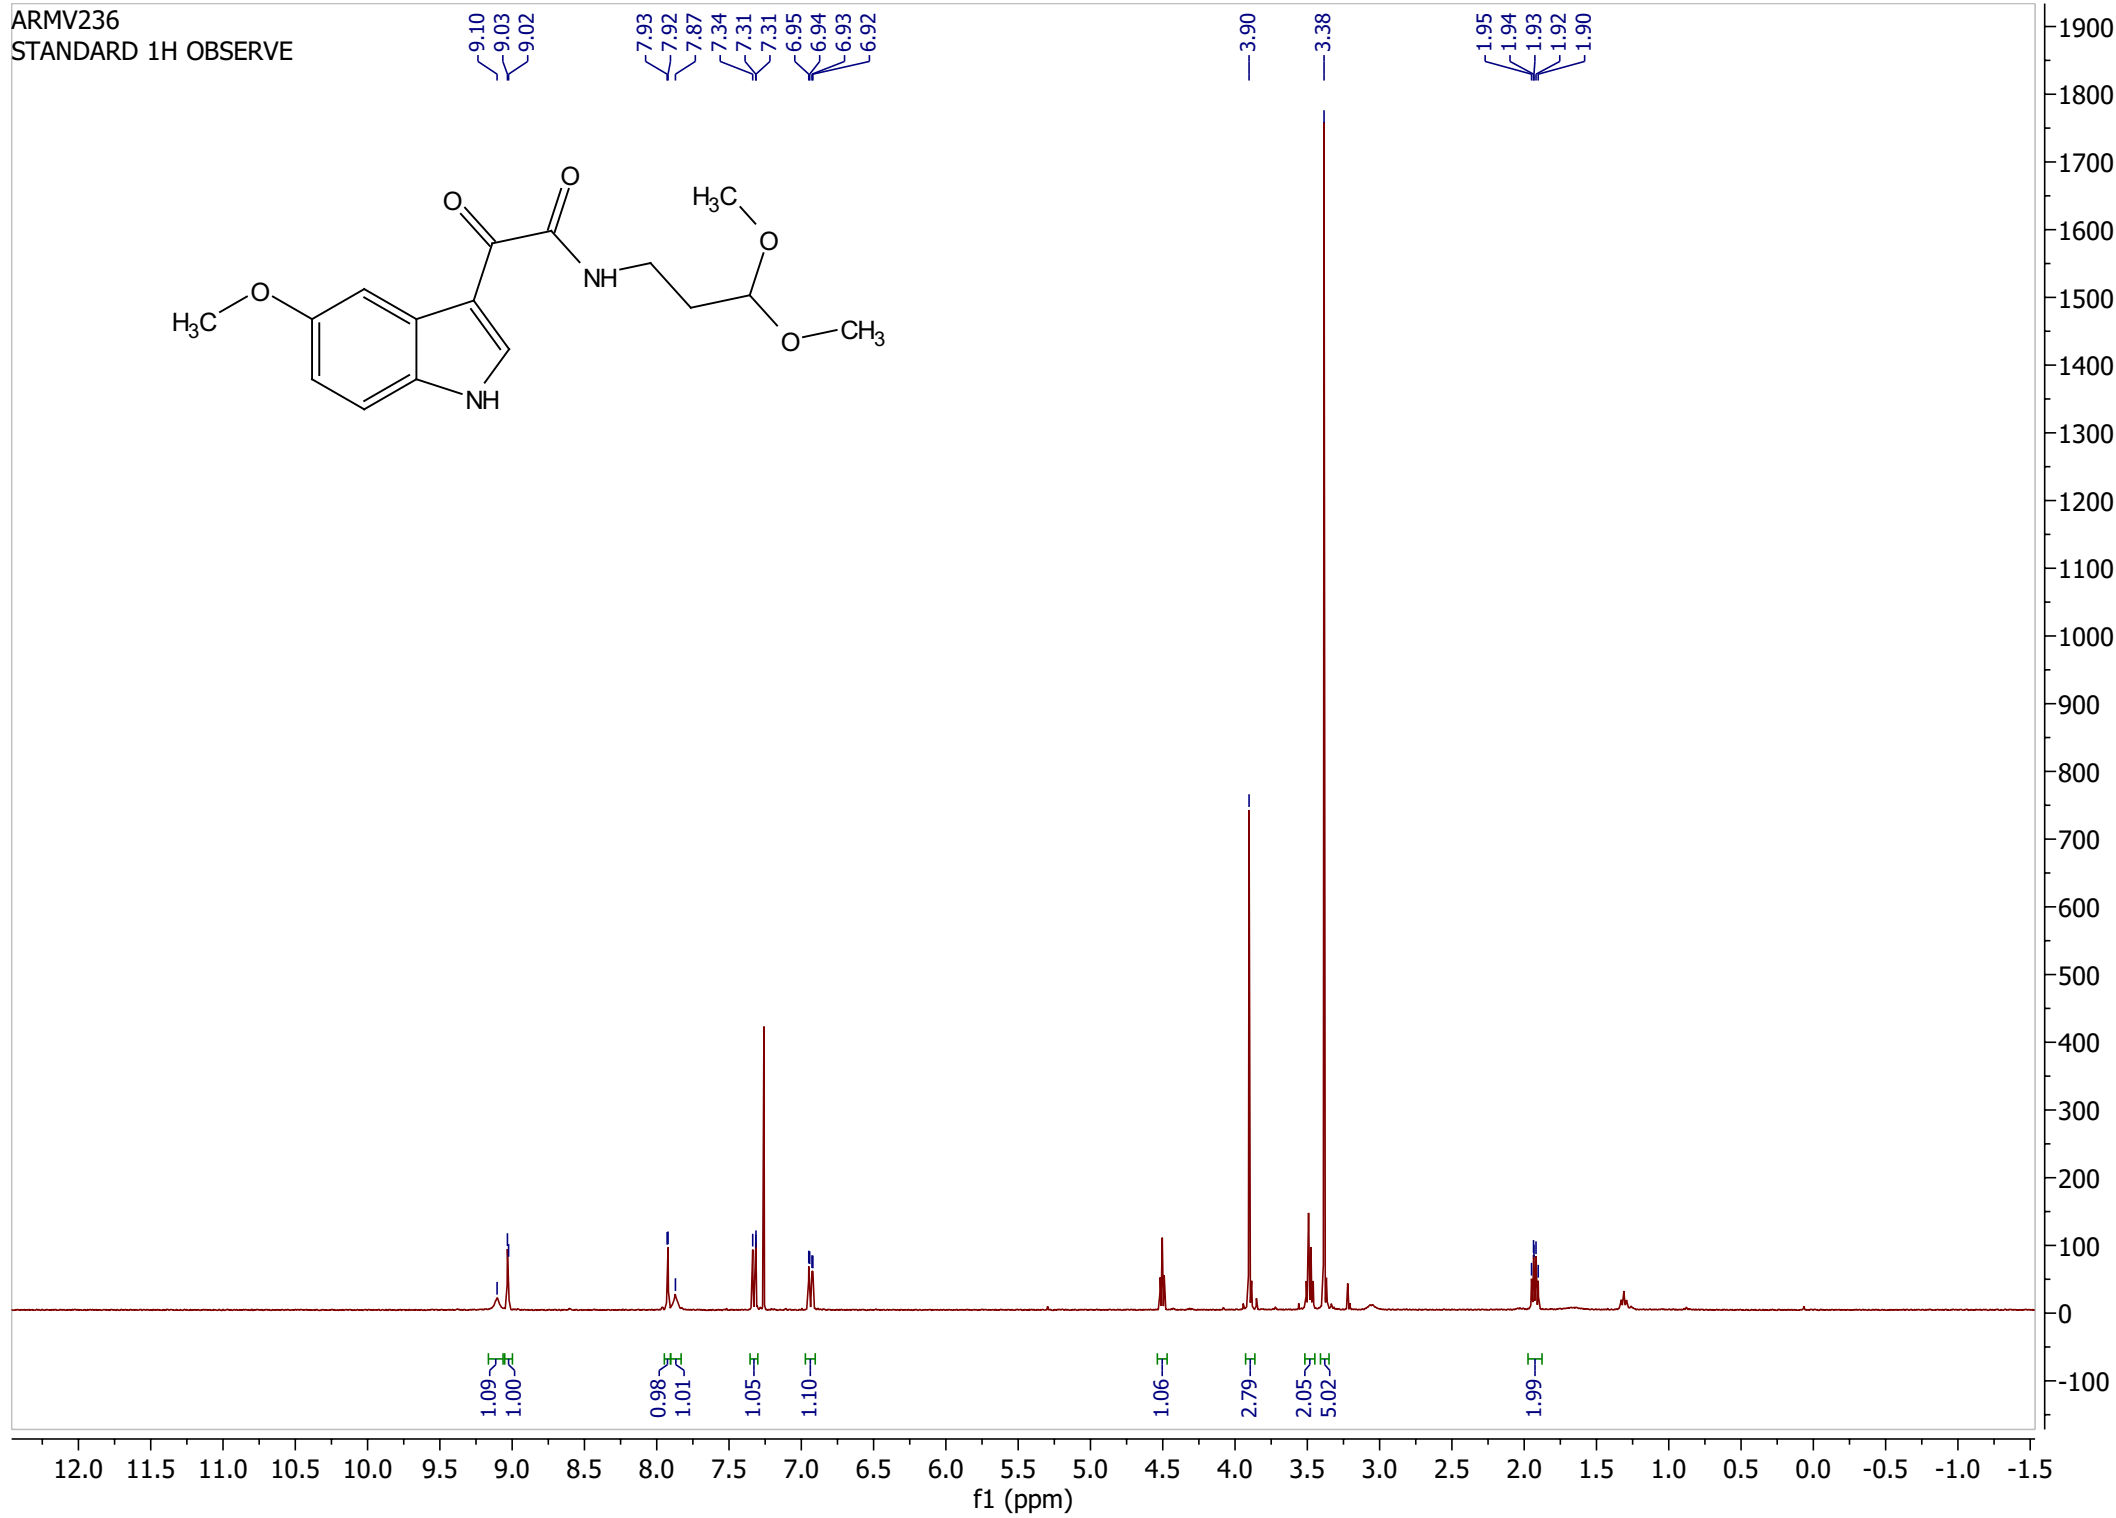

PROTON\_01  
ARMVII110B

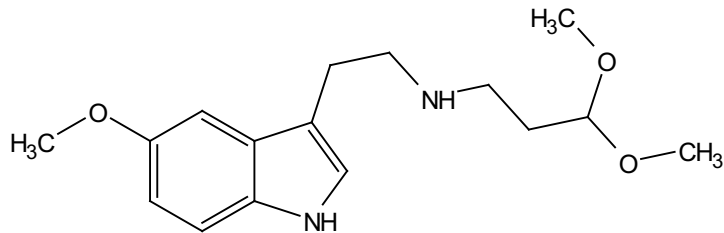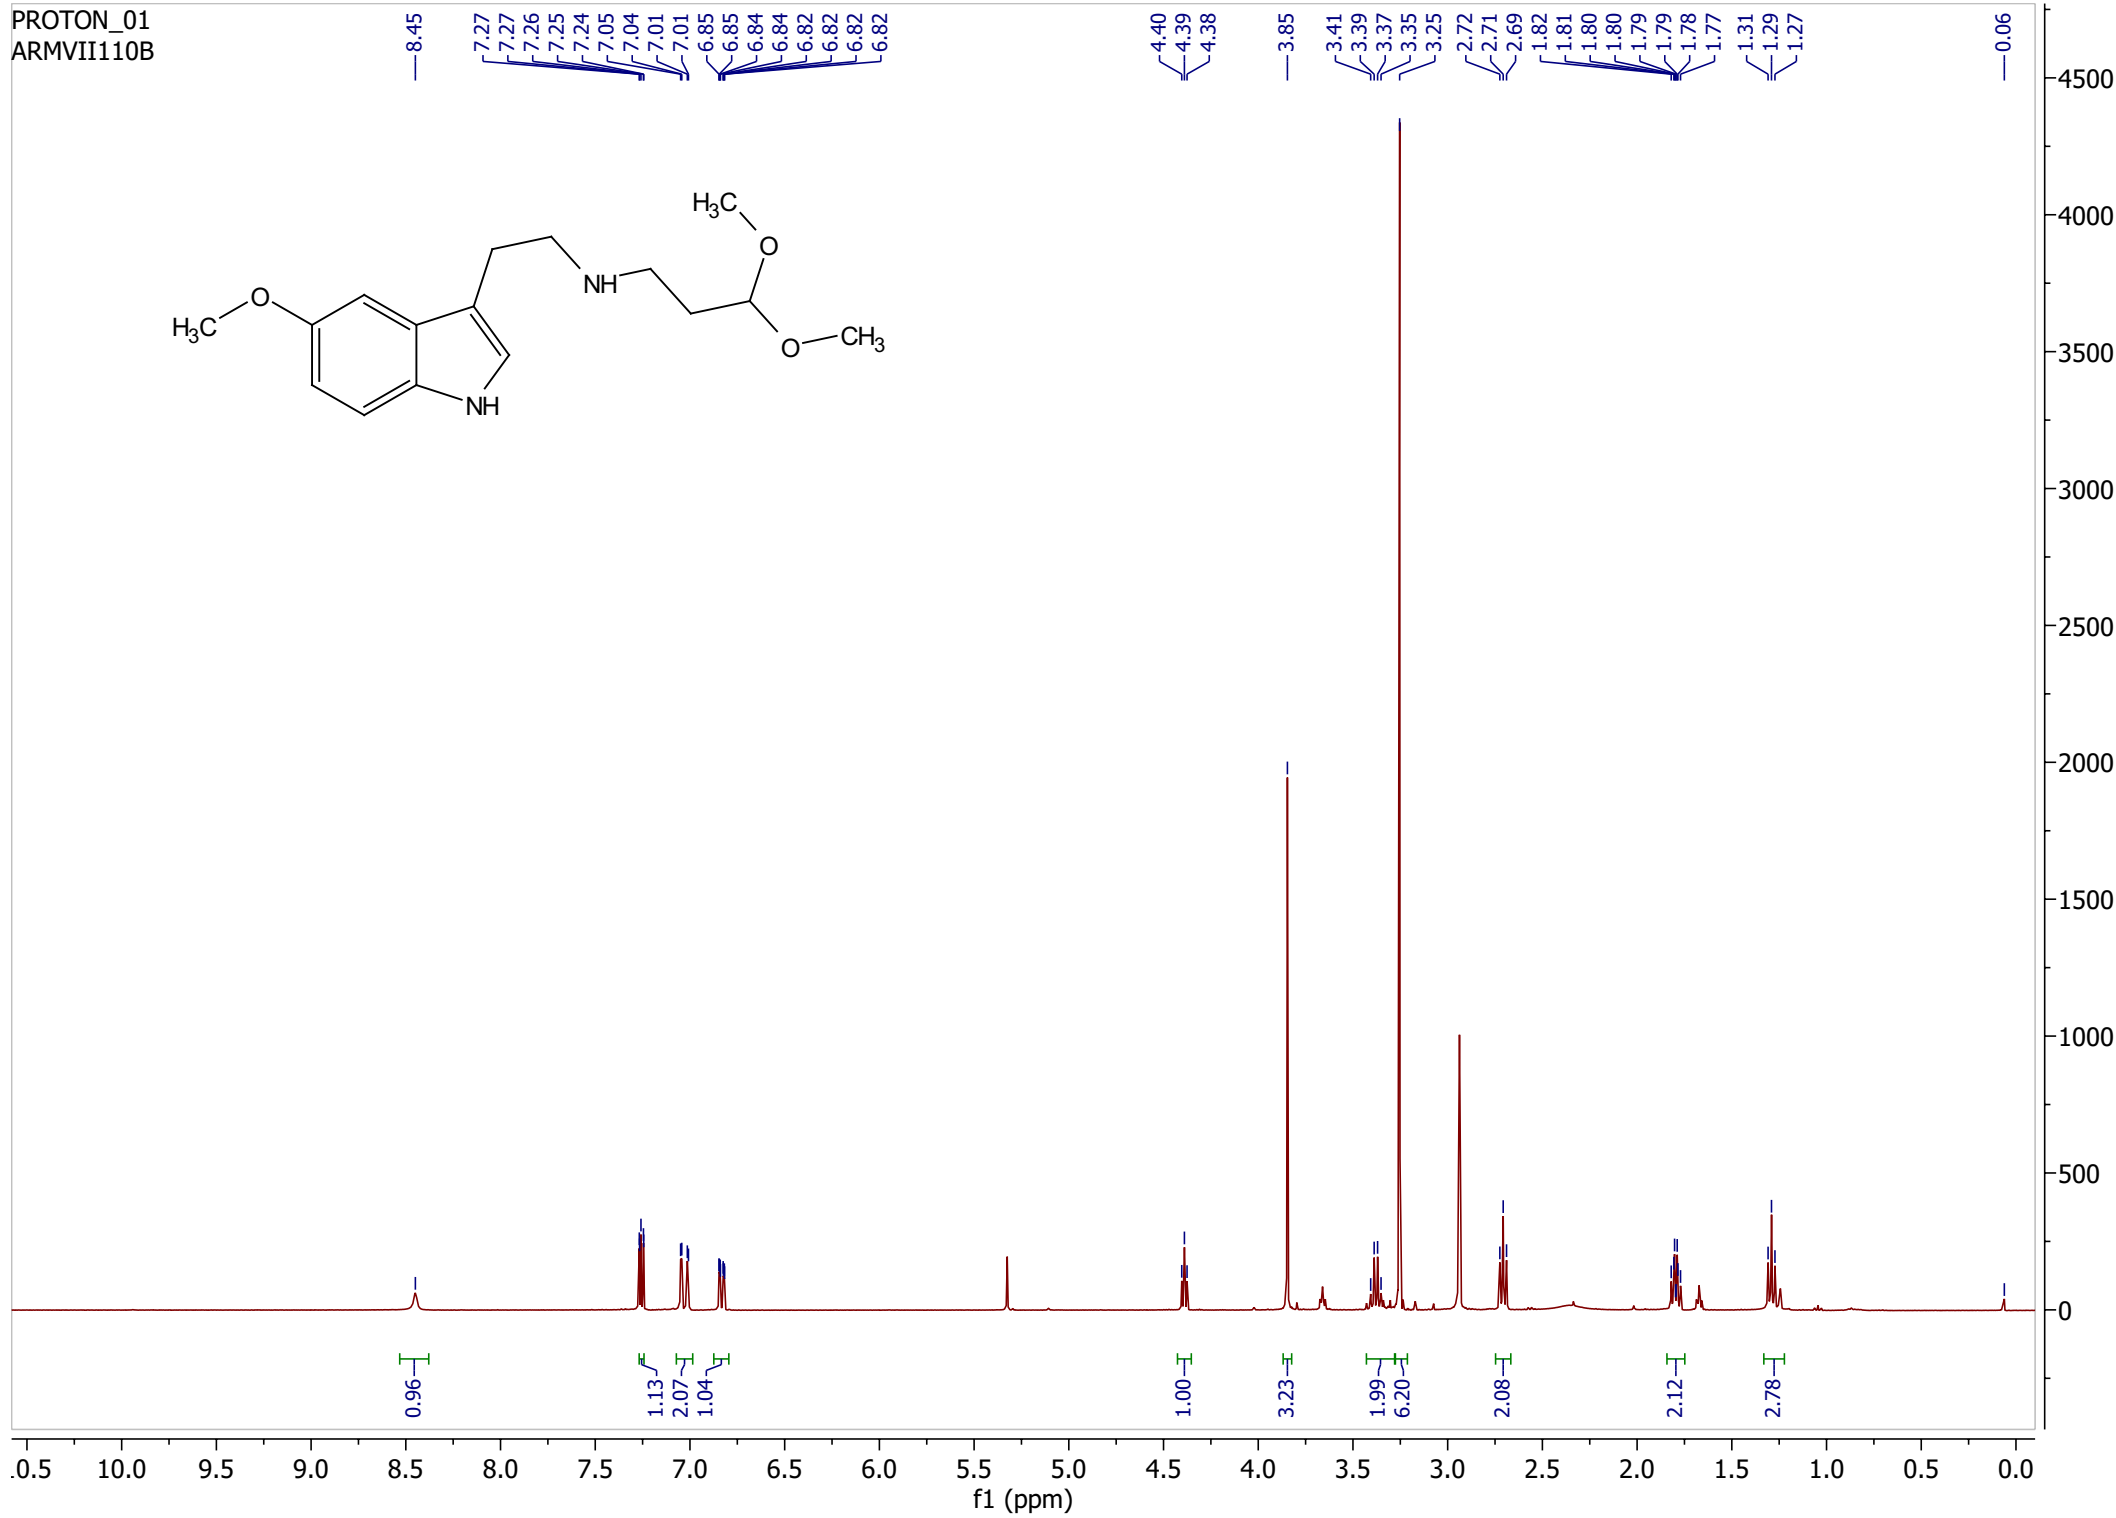

CARBON\_01  
ARMVII110A\_1

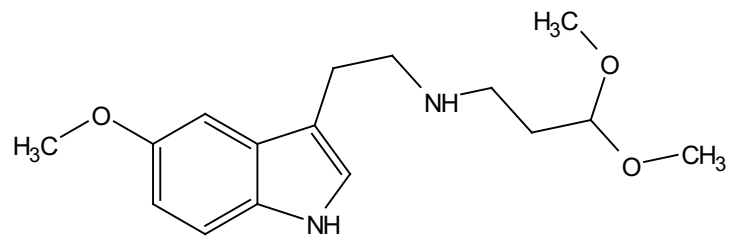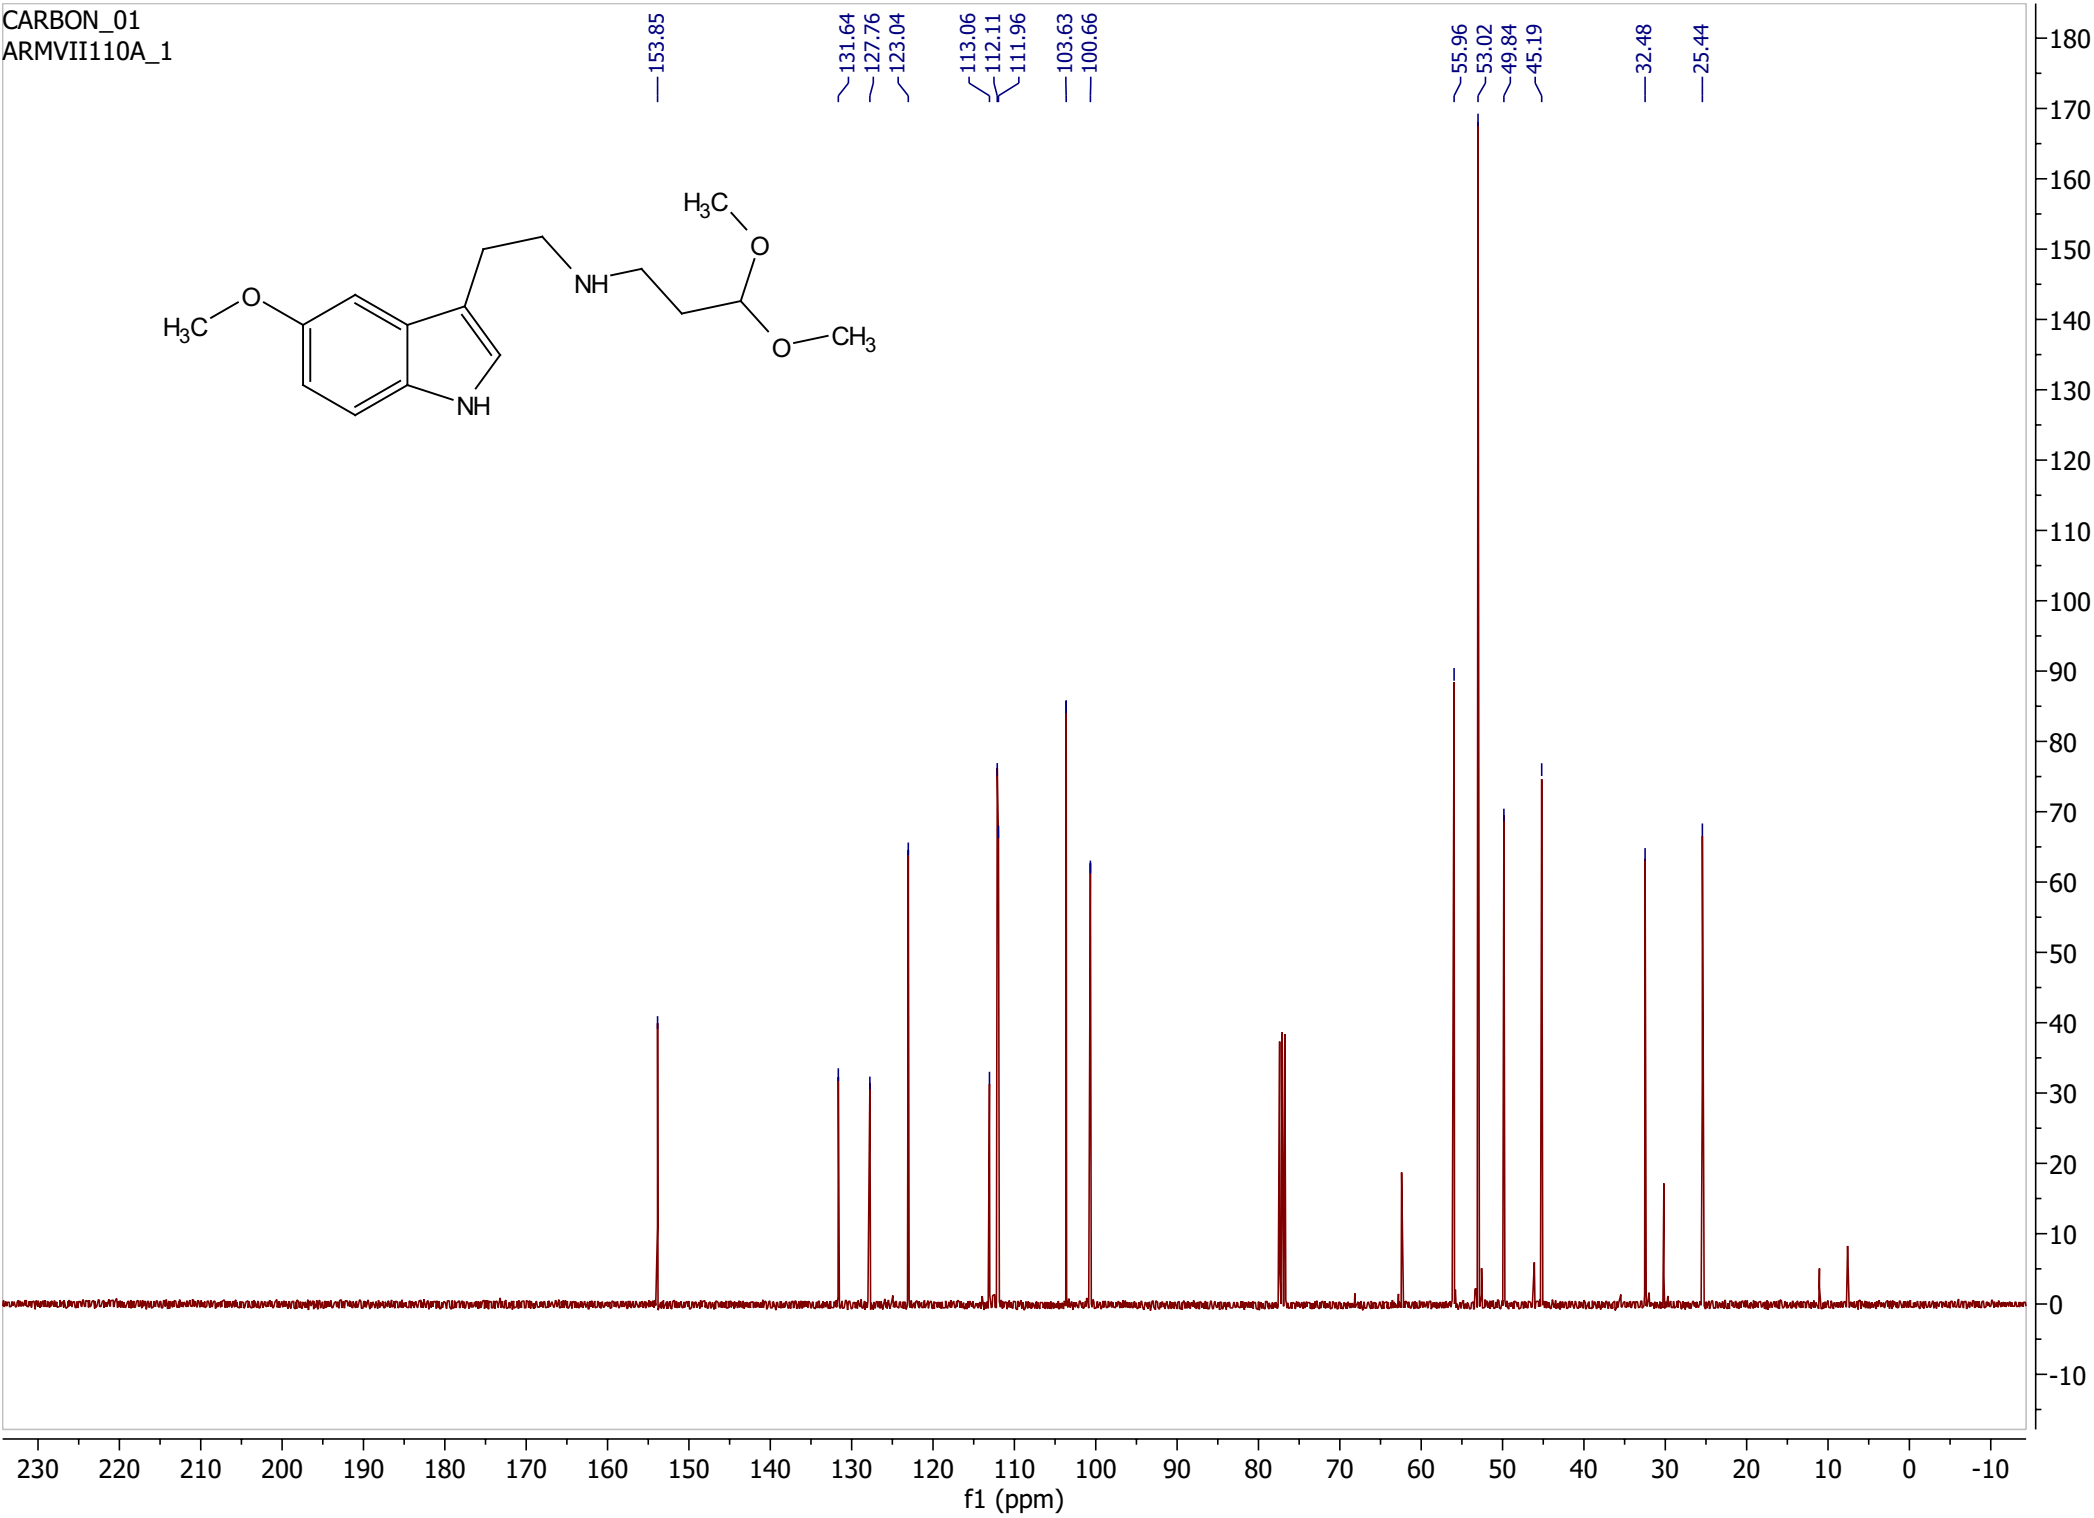

ARM 261  
7.26  
7.11  
7.11  
7.00  
7.00  
6.94  
6.94  
6.88  
6.88  
6.86  
6.85  
6.84  
6.83  
6.82  
6.81  
4.40  
4.32  
3.87  
3.86  
3.85  
3.84  
3.84  
3.69  
3.68  
3.67  
3.67  
3.66  
3.65  
3.63  
3.61  
3.61  
3.59  
3.47  
3.45  
3.45  
3.44  
3.43  
3.37  
3.36  
3.35  
3.35  
3.34  
3.34  
3.33  
3.32  
3.32  
3.32  
3.30  
3.29  
3.29  
3.27  
3.03  
3.02  
3.01  
3.00  
2.99  
2.97  
2.95  
1.93  
1.93  
1.92  
1.91  
1.91  
1.90  
1.89  
1.89  
1.88  
1.85  
1.84  
1.83  
1.83  
1.81  
1.81  
1.68  
1.67  
1.66

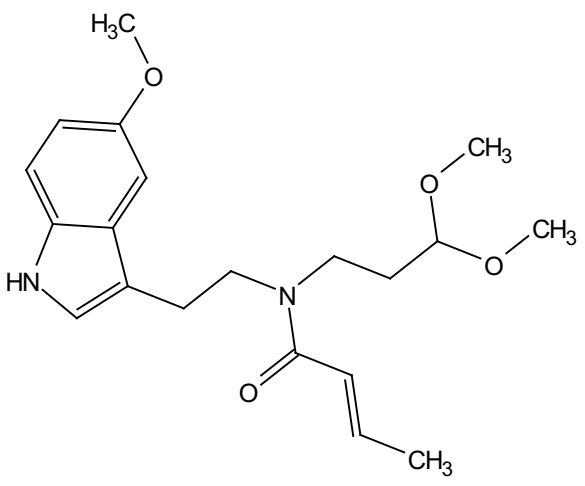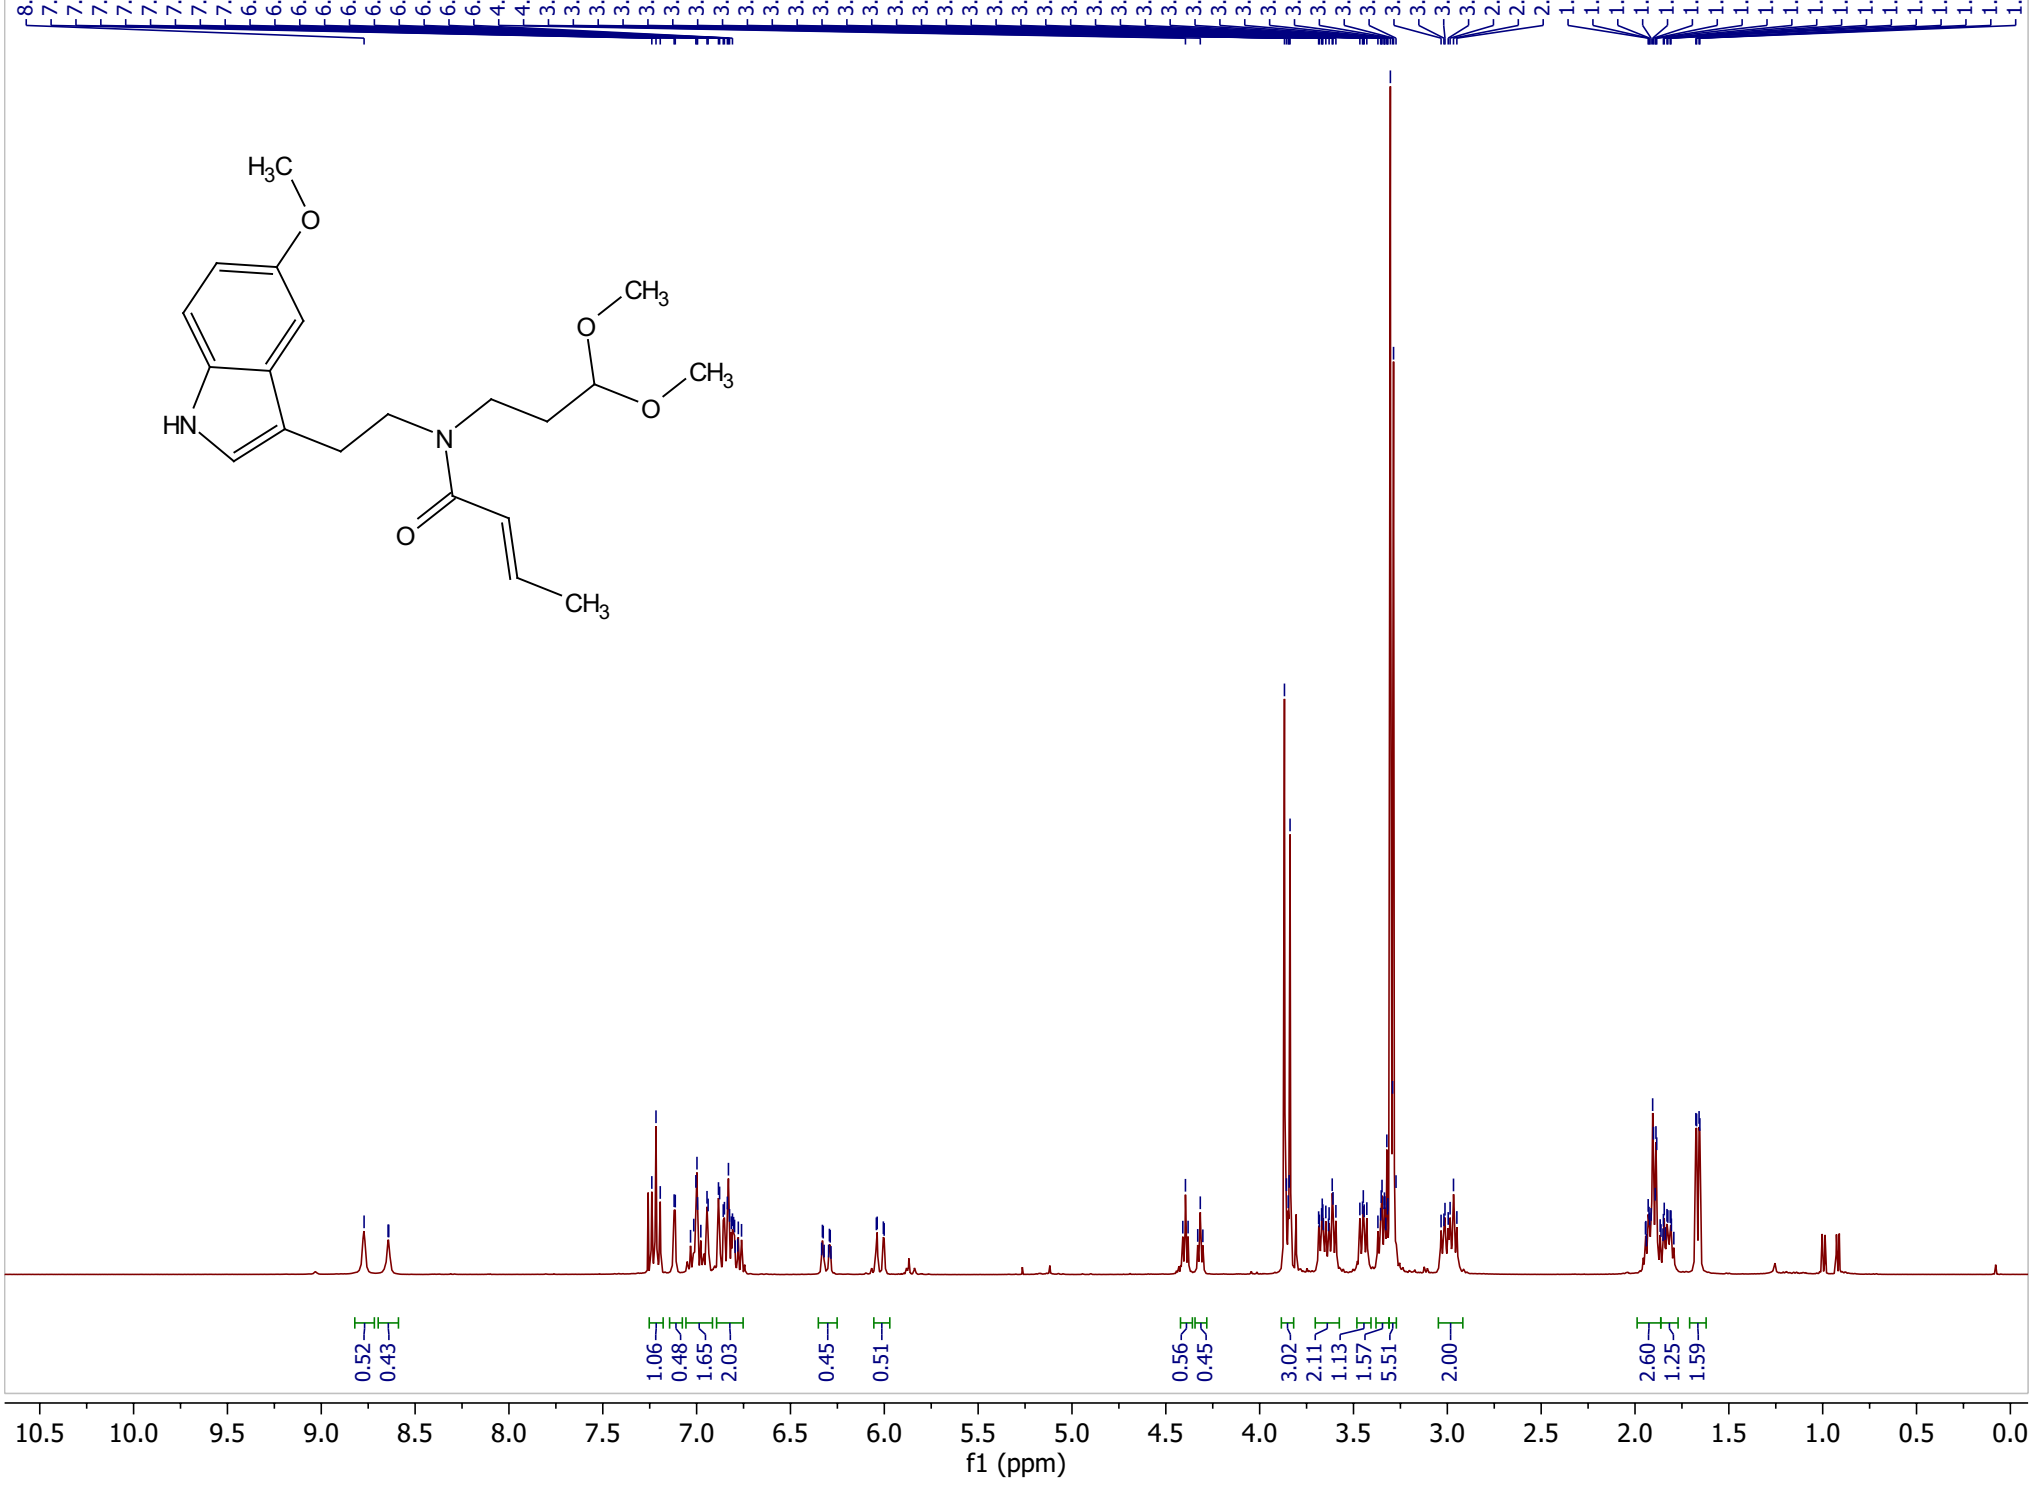

ARMV261a\_04

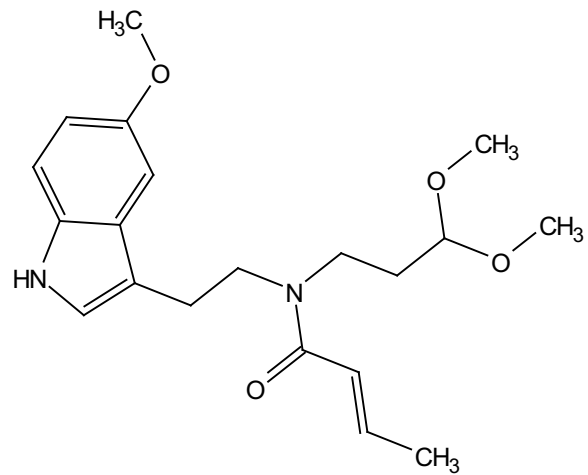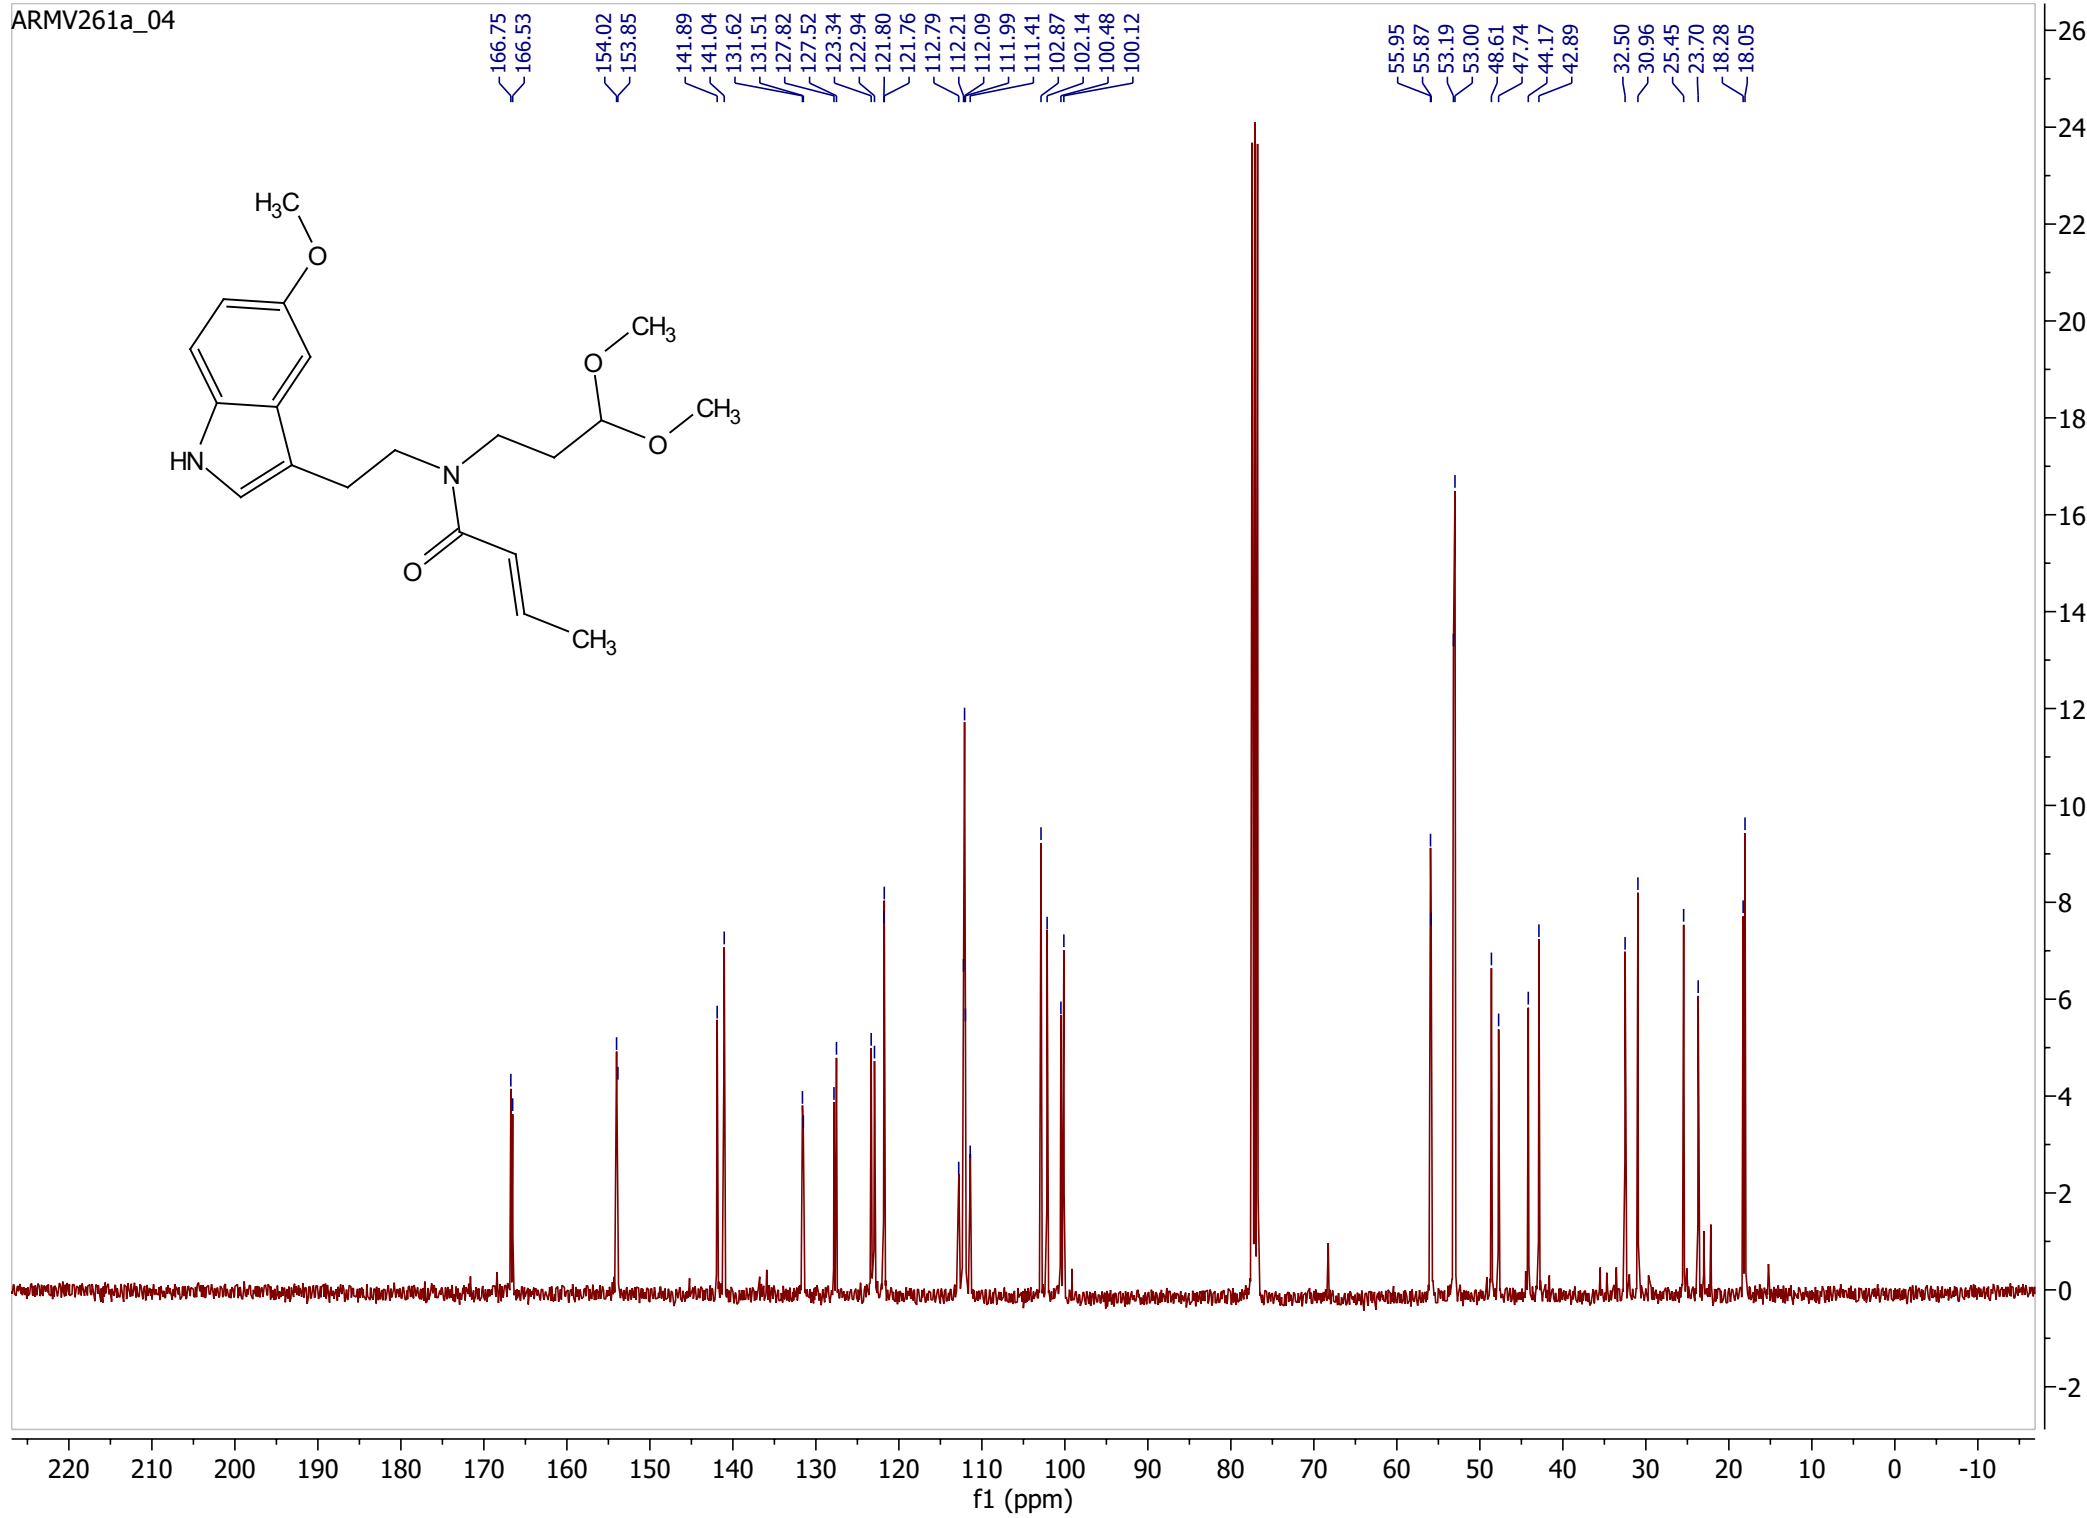

PROTON 01  
ARMV1114

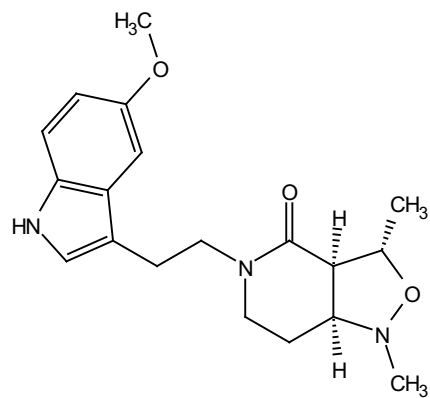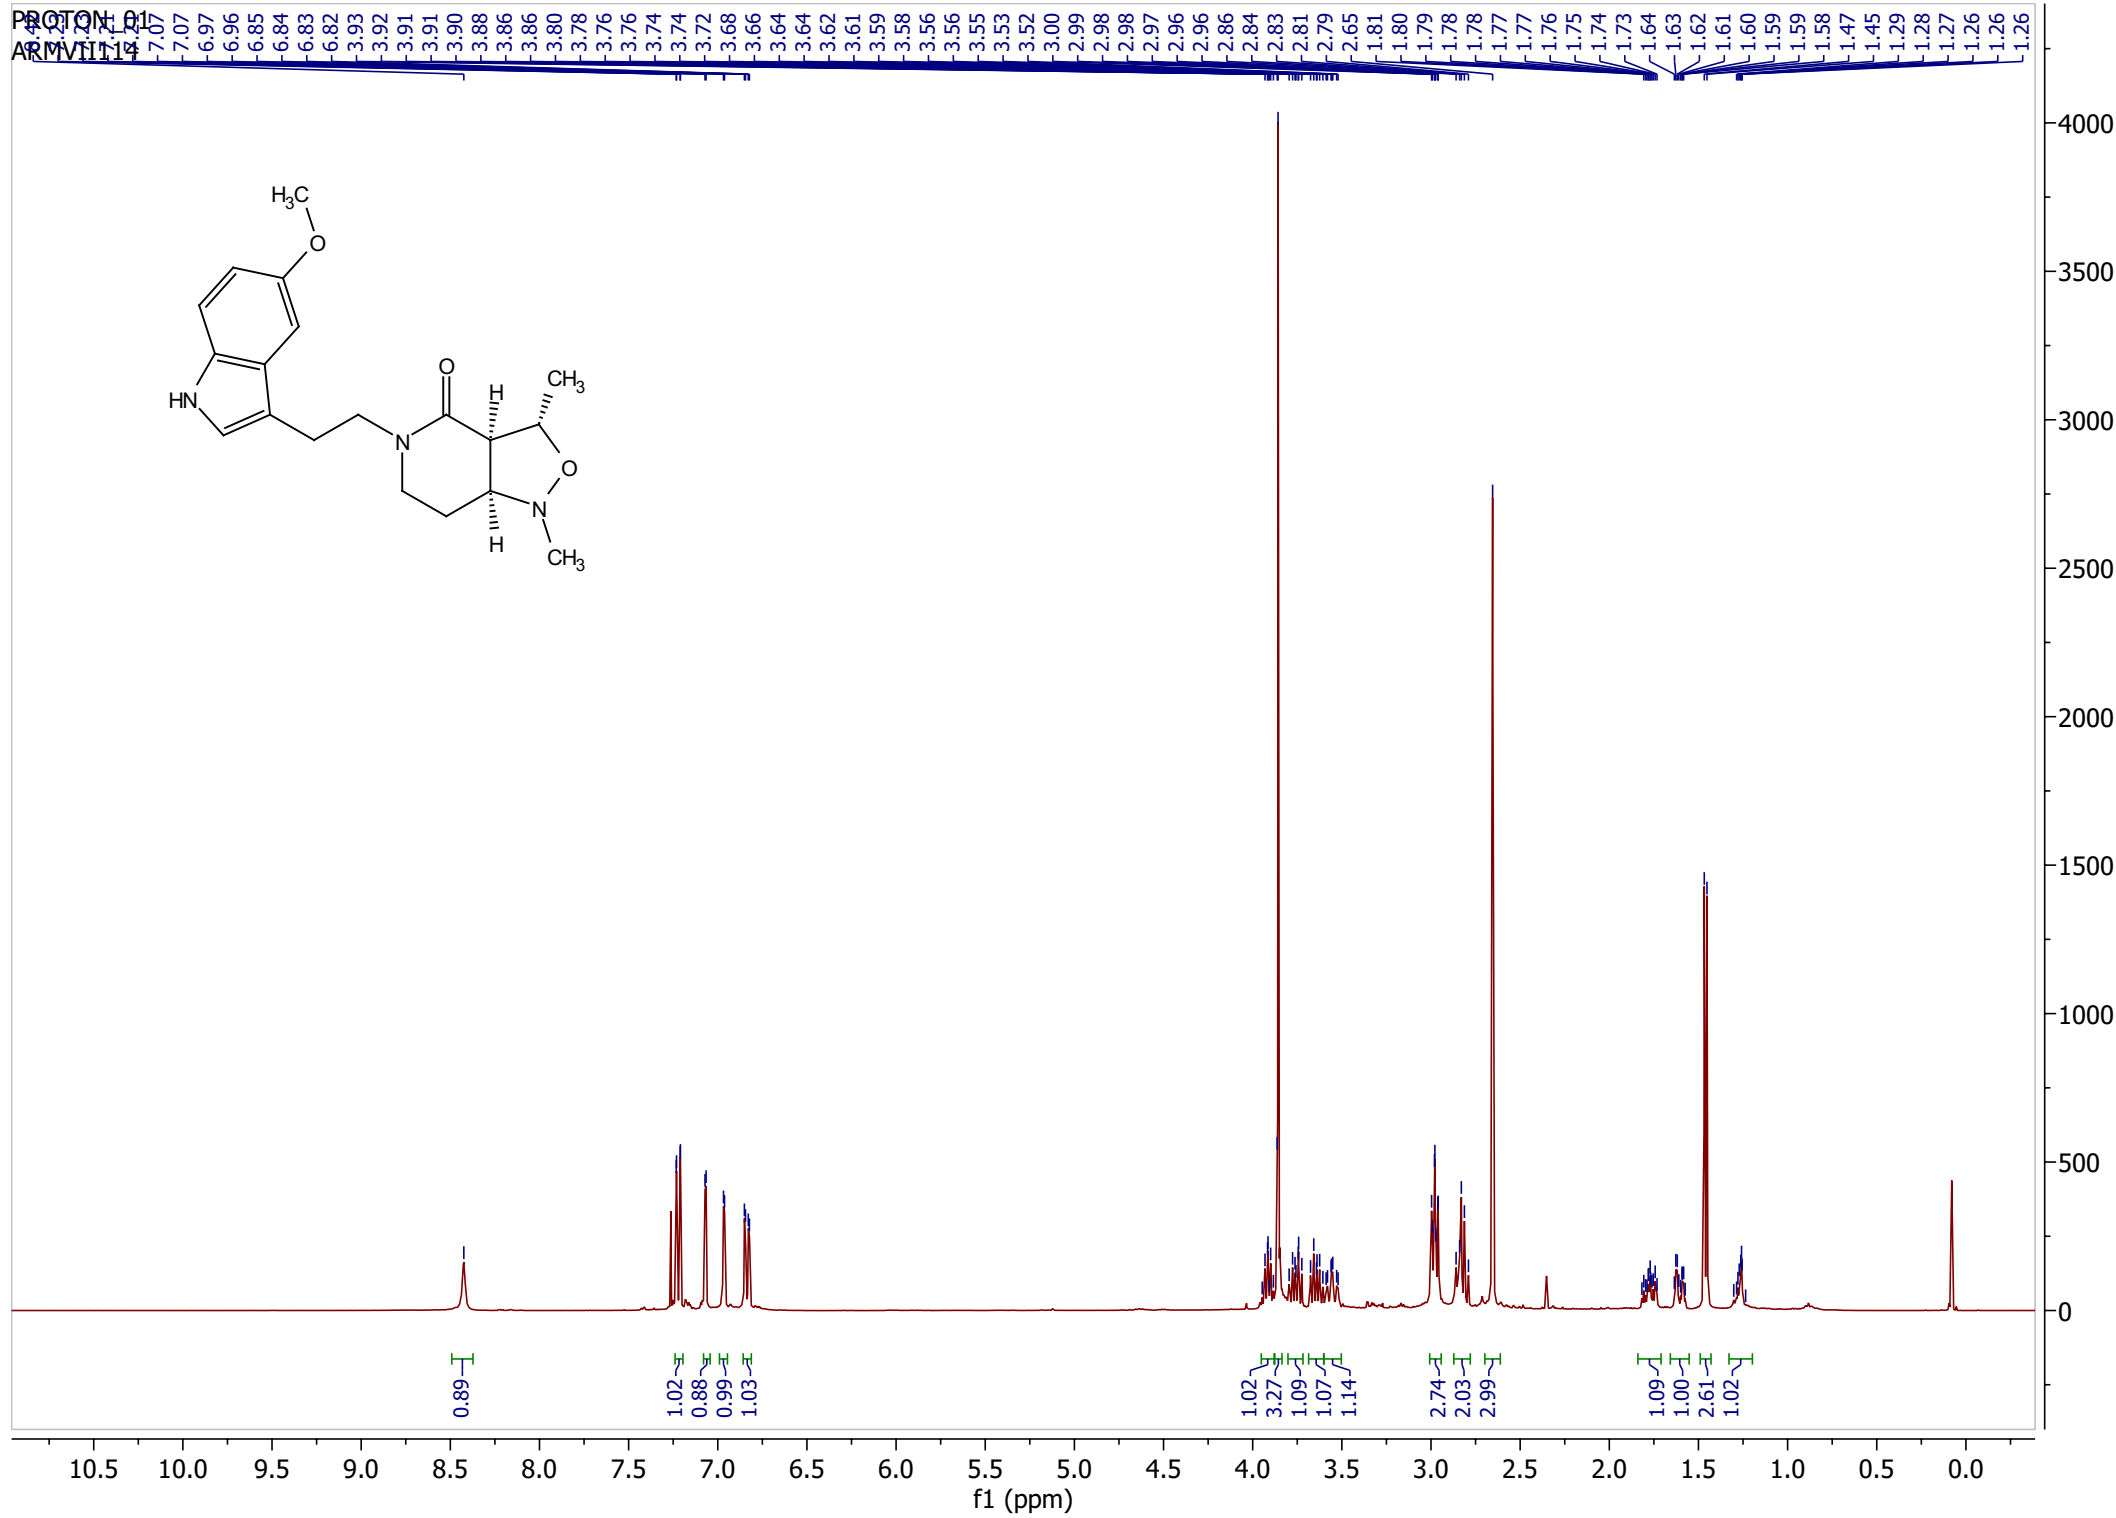

CARBON\_01  
ARMVII114

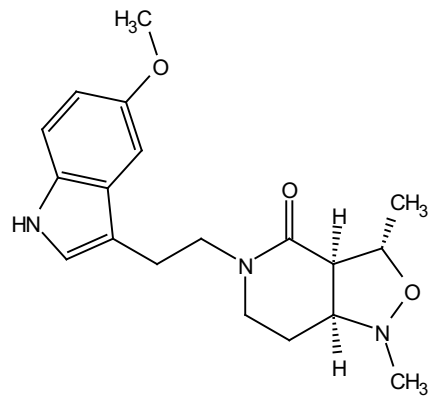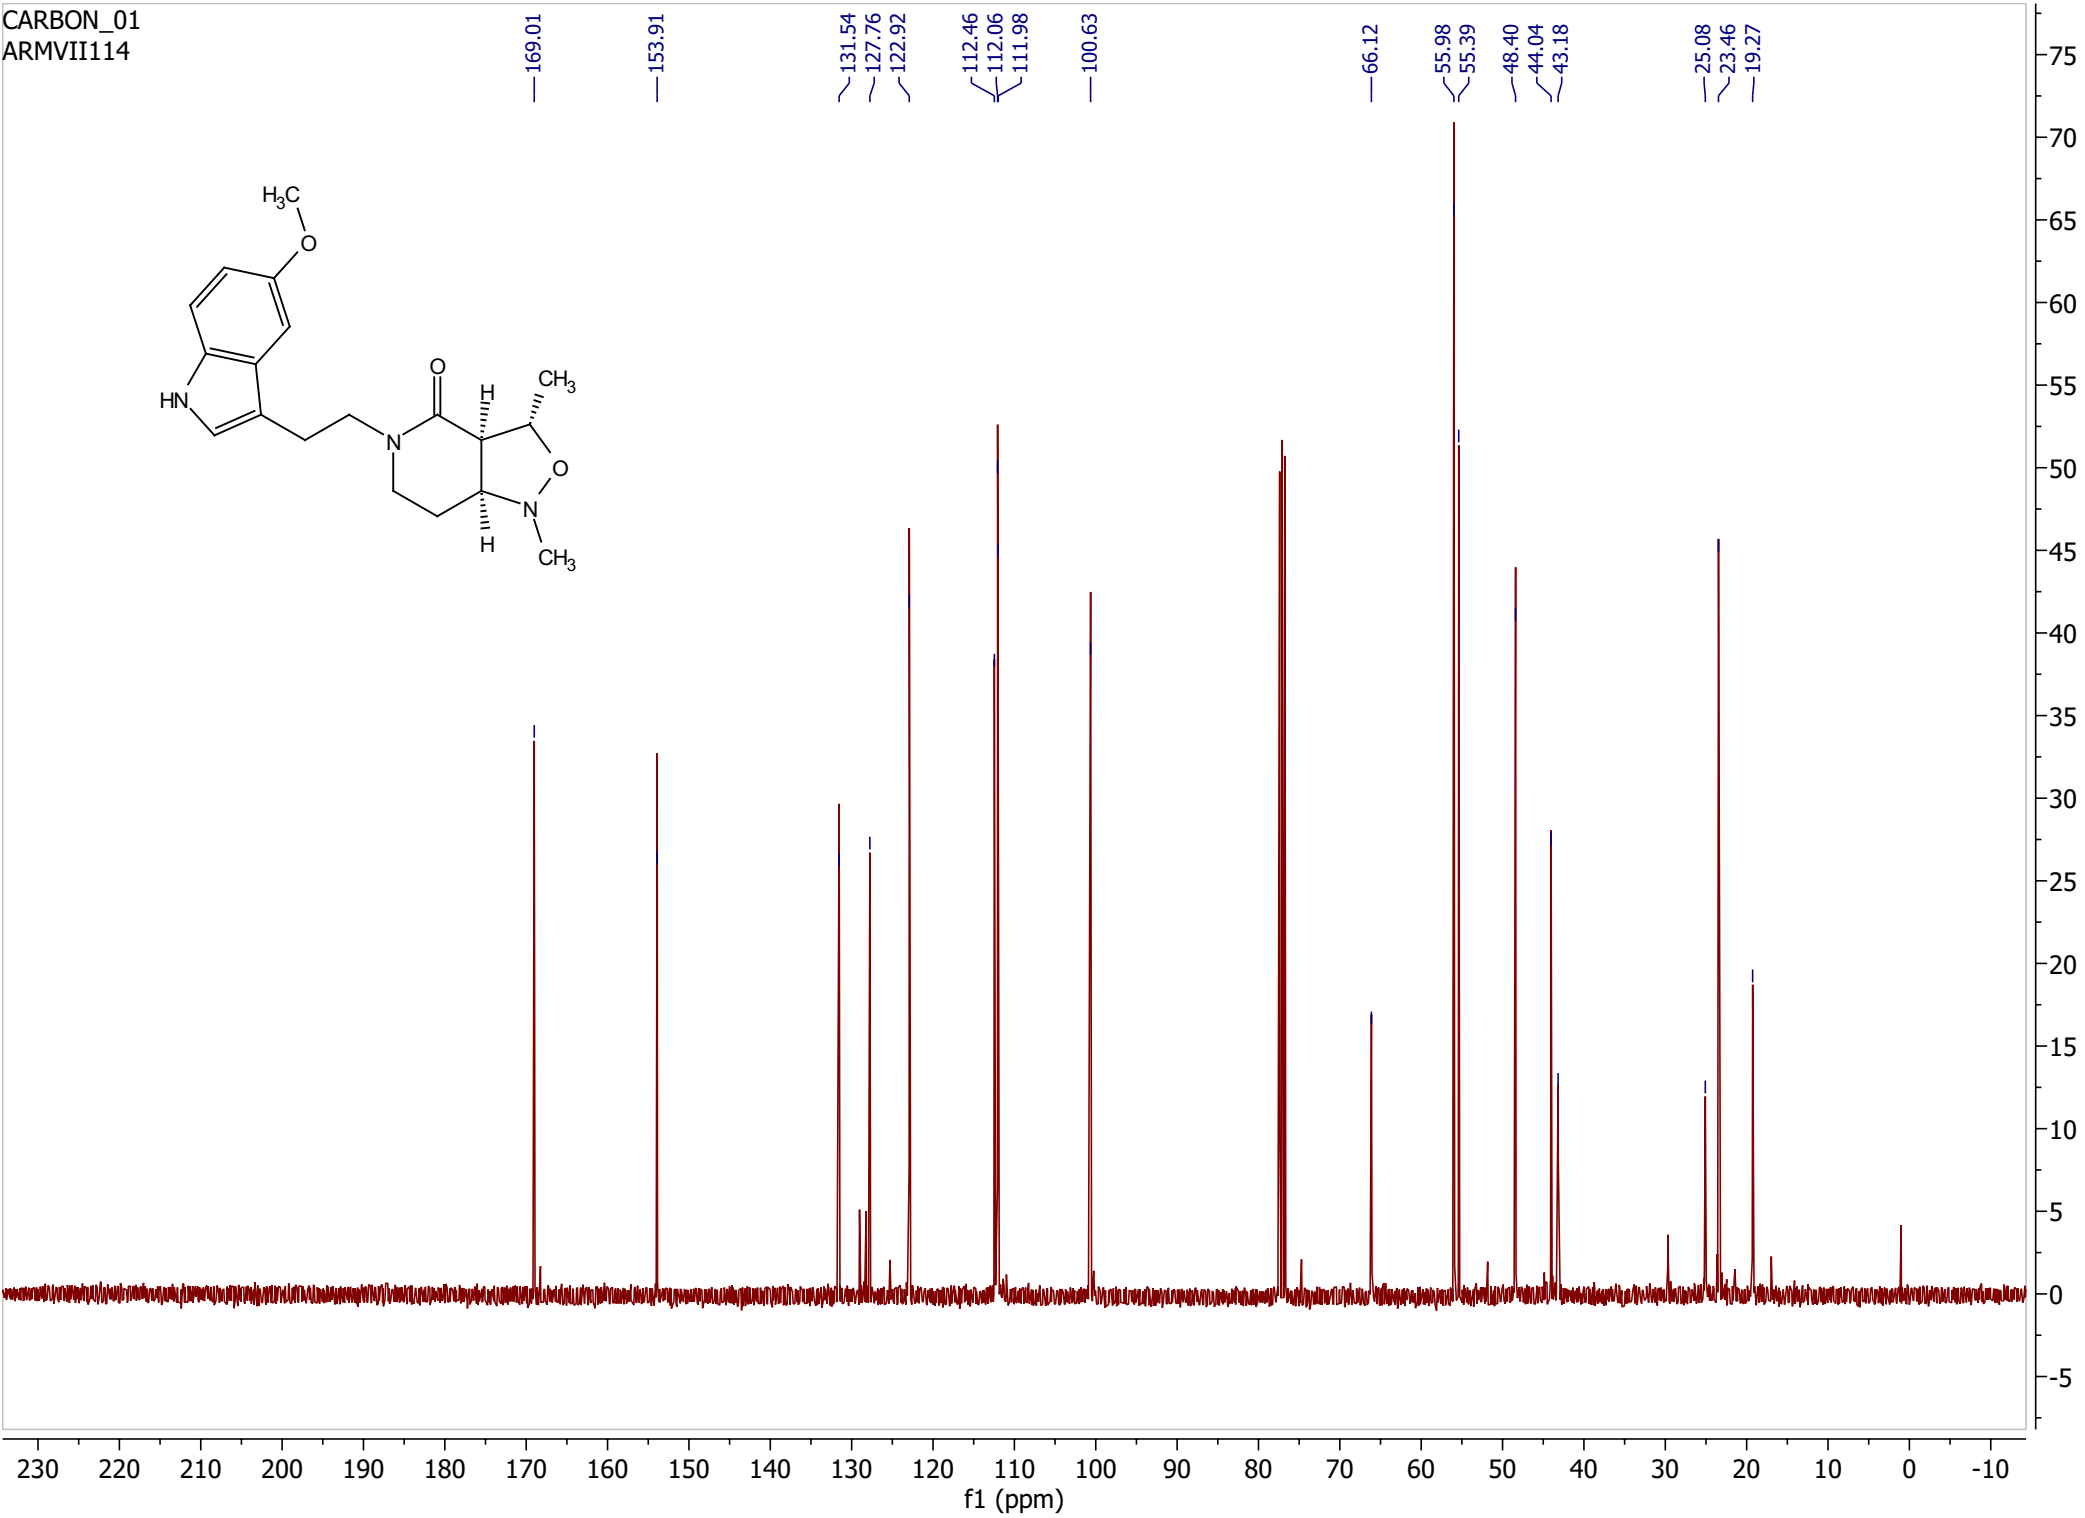

ARMV230BCd3od  
STANDARD 1H OBSERVE

-4.89 HDO  
-4.88 HDO

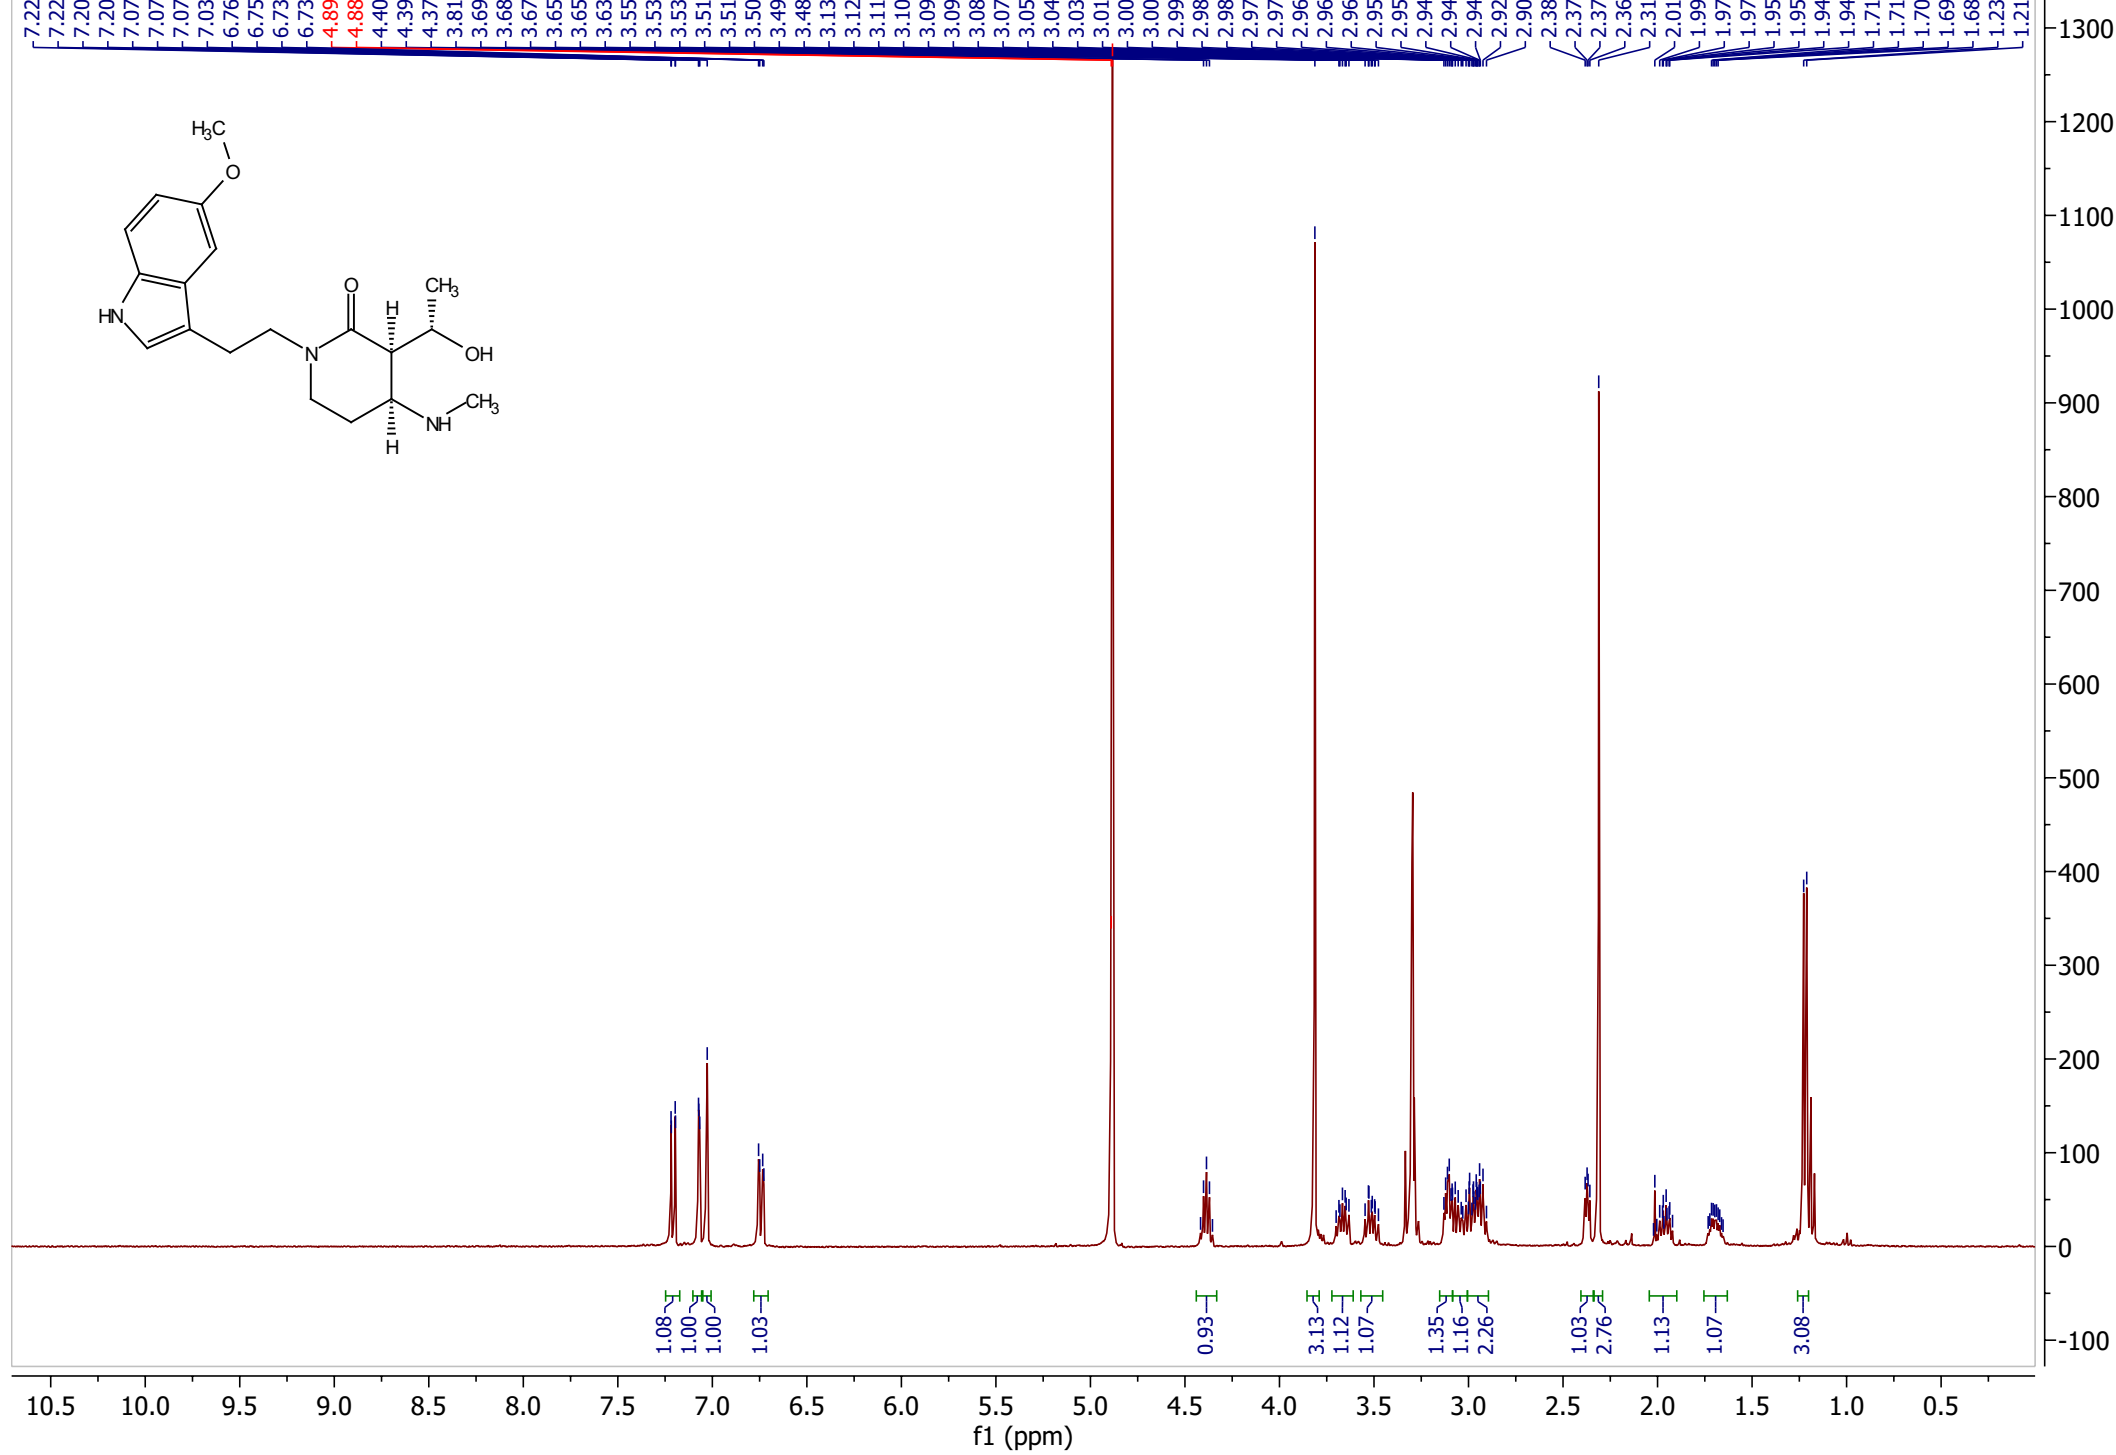



ARMV230B3\_01

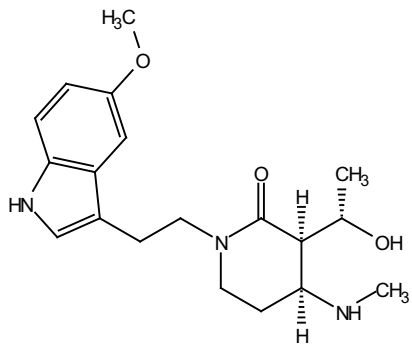

169.75

153.59

131.91

127.77

123.00

111.57

111.45

111.18

99.93

66.14

54.91

54.59

32.21

23.61

22.31

21.01

220 210 200 190 180 170 160 150 140 130 120 110 100 90 80 70 60 50 40 30 20 10 0 -10 -20

f1 (ppm)

220 210 200 190 180 170 160 150 140 130 120 110 100 90 80 70 60 50 40 30 20 10 0 -10 -20

ARM 253A  
STANDARD 1H OBSERVE

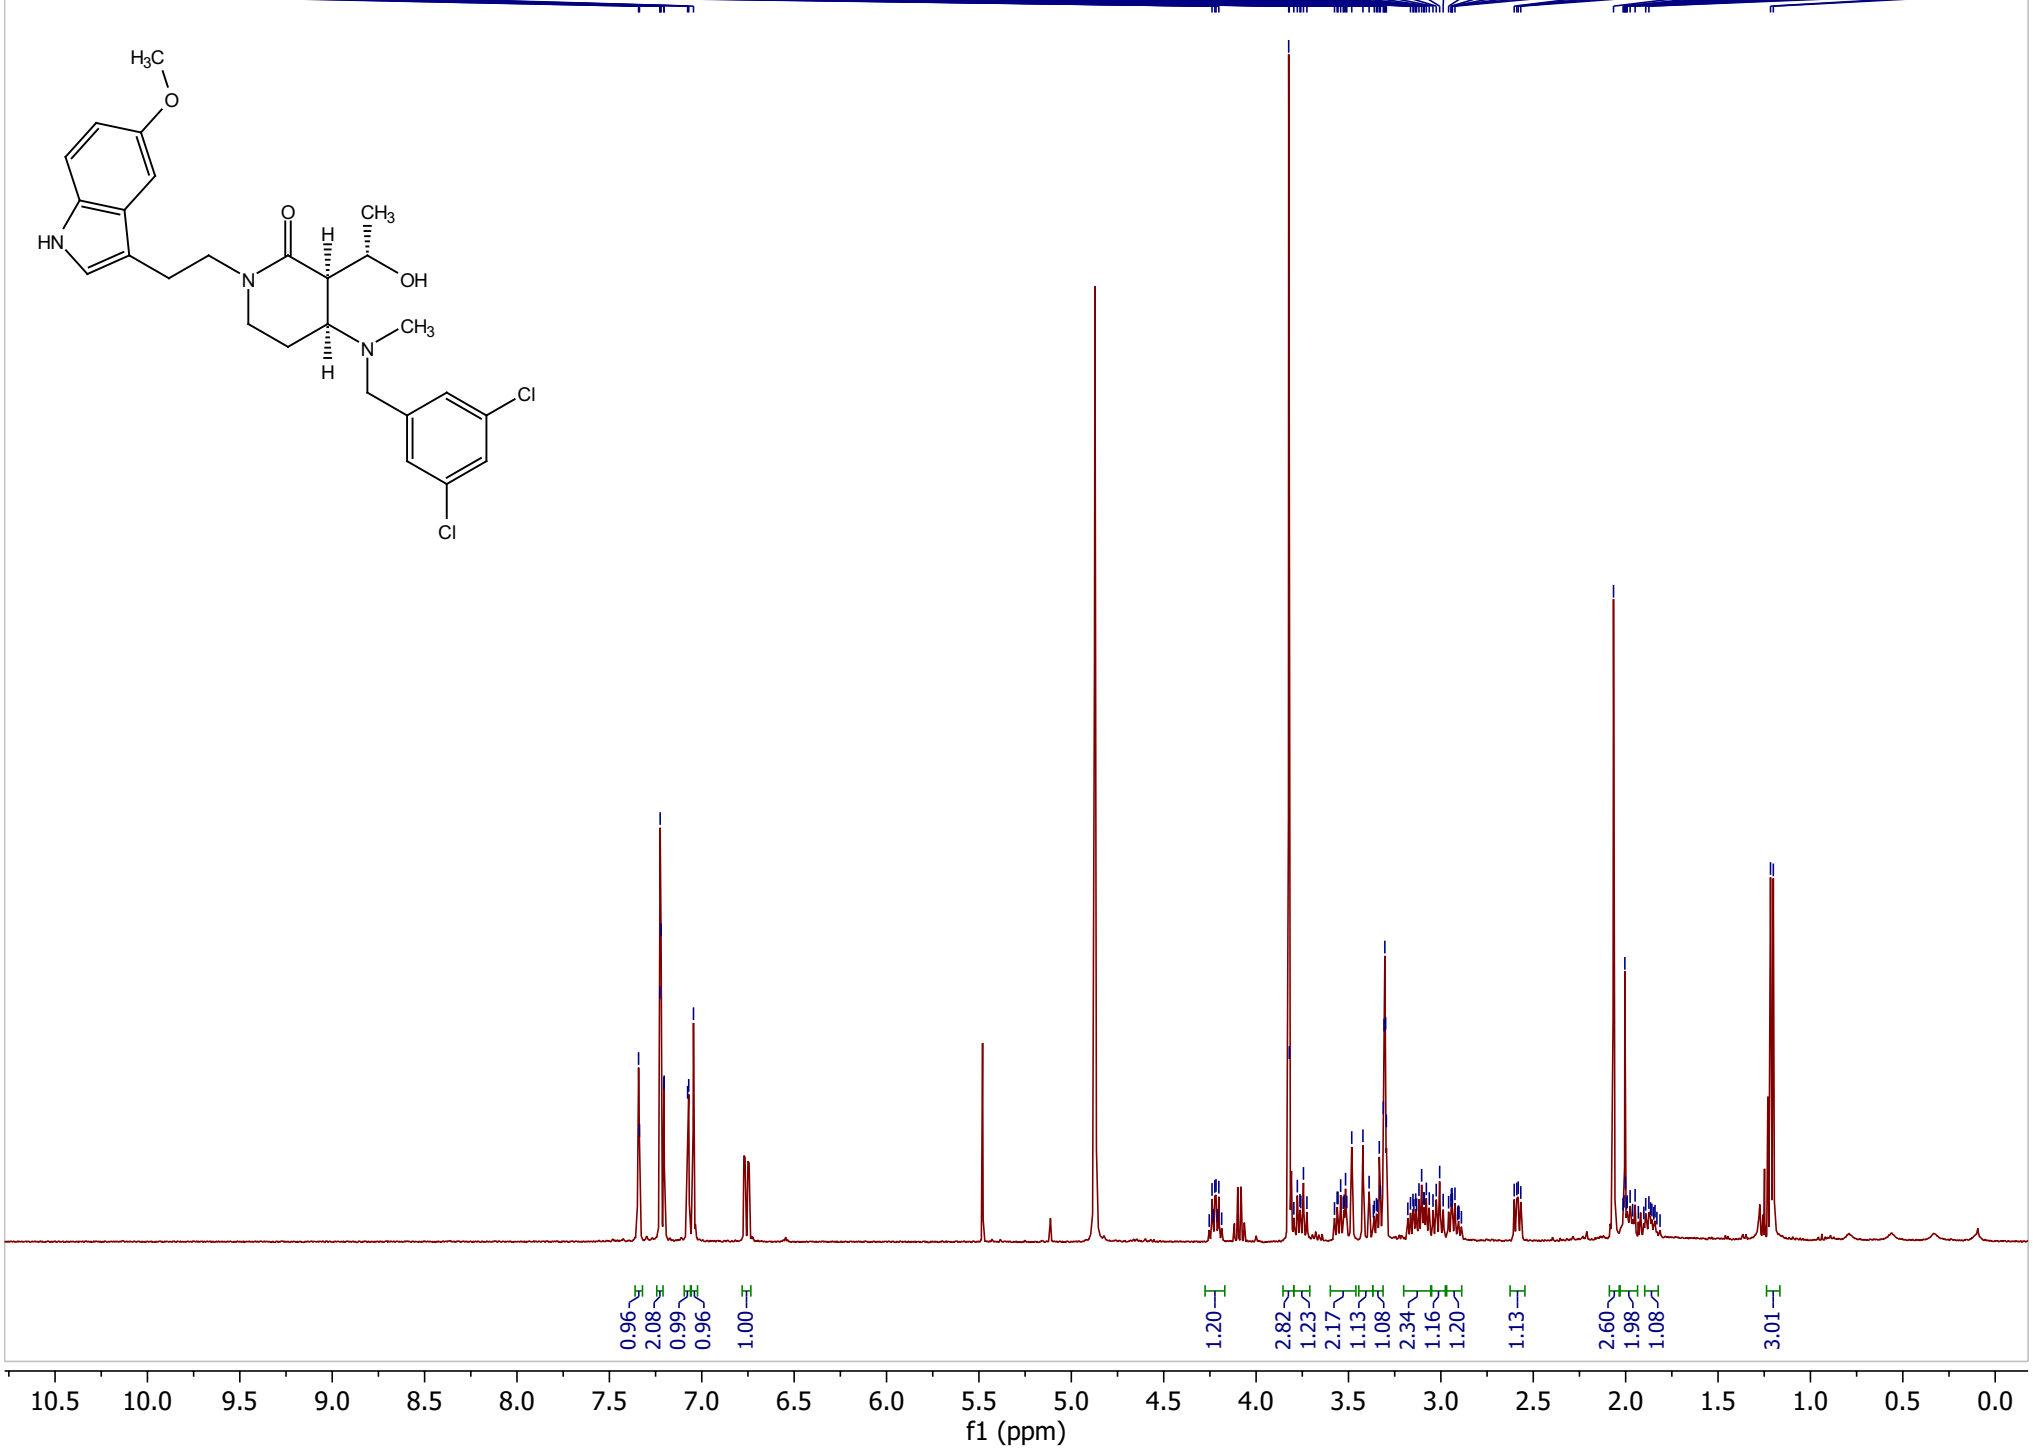

10.5 10.0 9.5 9.0 8.5 8.0 7.5 7.0 6.5 6.0 5.5 5.0 4.5 4.0 3.5 3.0 2.5 2.0 1.5 1.0 0.5 0.0

ARMV252\_01

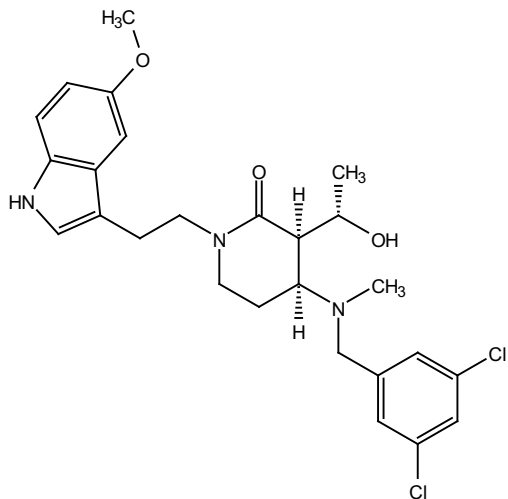

166.43  
166.21  
136.36  
136.33  
128.18  
127.67  
127.56  
127.53  
127.42  
127.07  
122.40  
122.13  
121.91  
119.49  
119.30  
118.81  
118.16  
113.03  
111.76  
111.48  
111.23  
102.82  
102.09

53.22  
53.01  
48.96  
47.80  
44.16  
42.95  
32.49  
30.87  
25.47  
23.63

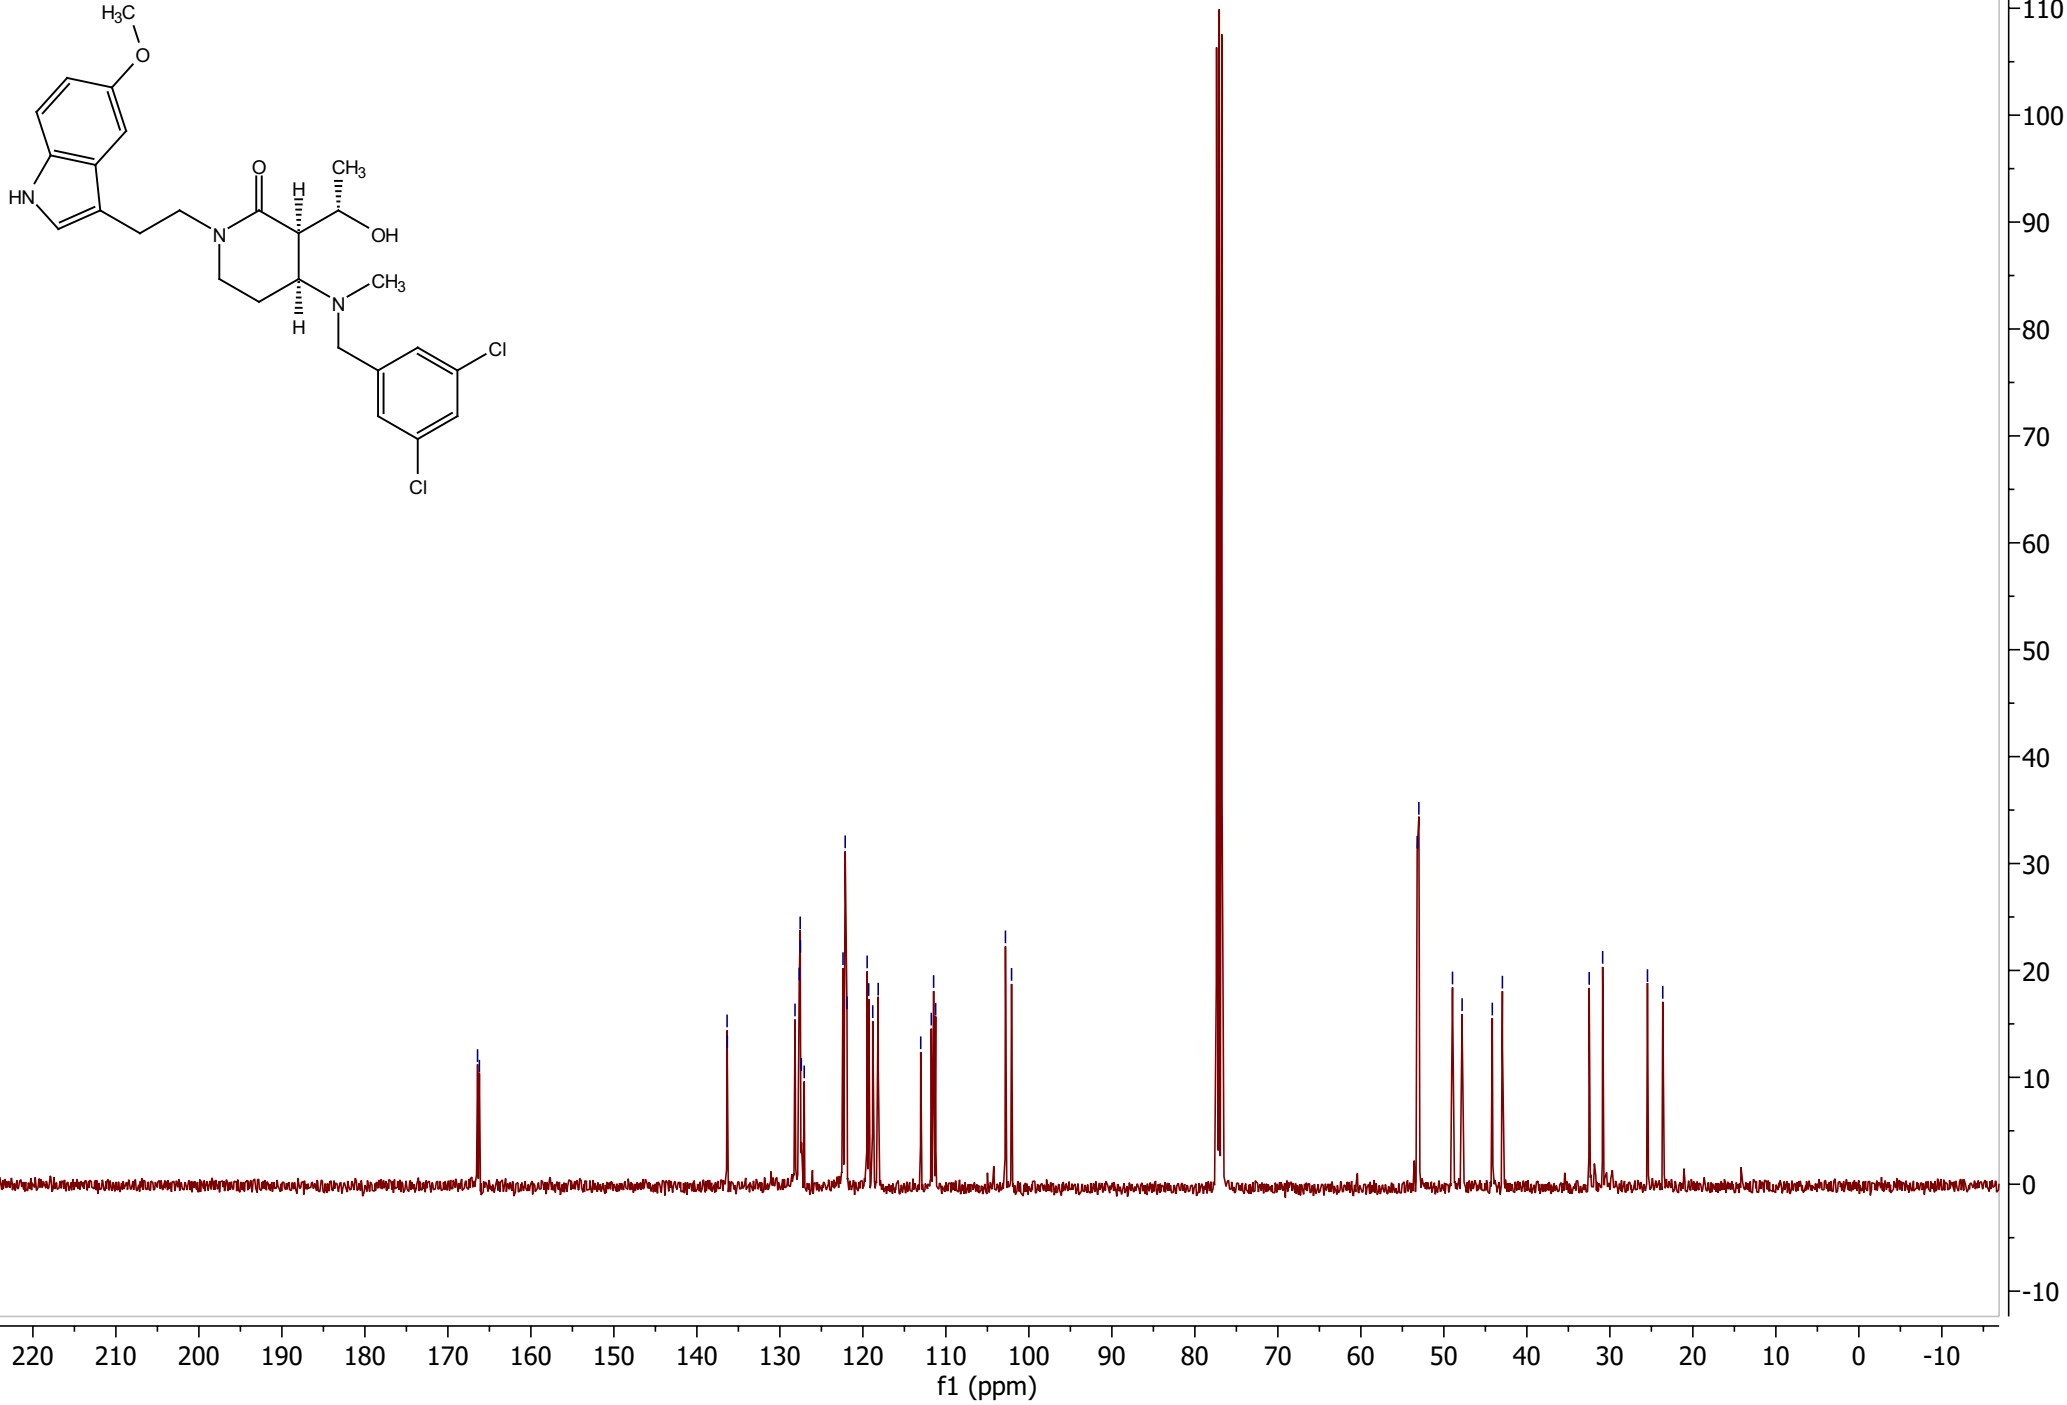

ARMV237  
STANDARD 1H OBSERVE

9.15  
9.03  
9.02

8.04  
8.04  
7.87  
7.86  
7.50  
7.50  
7.48  
7.48  
7.42  
7.41  
7.40  
7.40  
7.39  
7.38  
7.38  
7.35  
7.34  
7.34  
7.33  
7.33  
7.32  
7.31  
7.26  
7.02  
7.02  
7.00  
7.00

5.15  
4.52  
4.50  
4.49

3.51  
3.49  
3.48  
3.46  
3.39  
3.37  
3.36

1.95  
1.94  
1.92  
1.92  
1.90

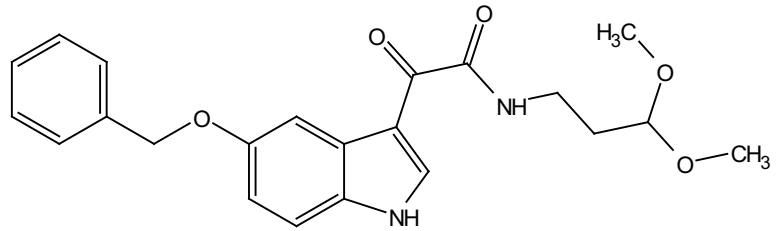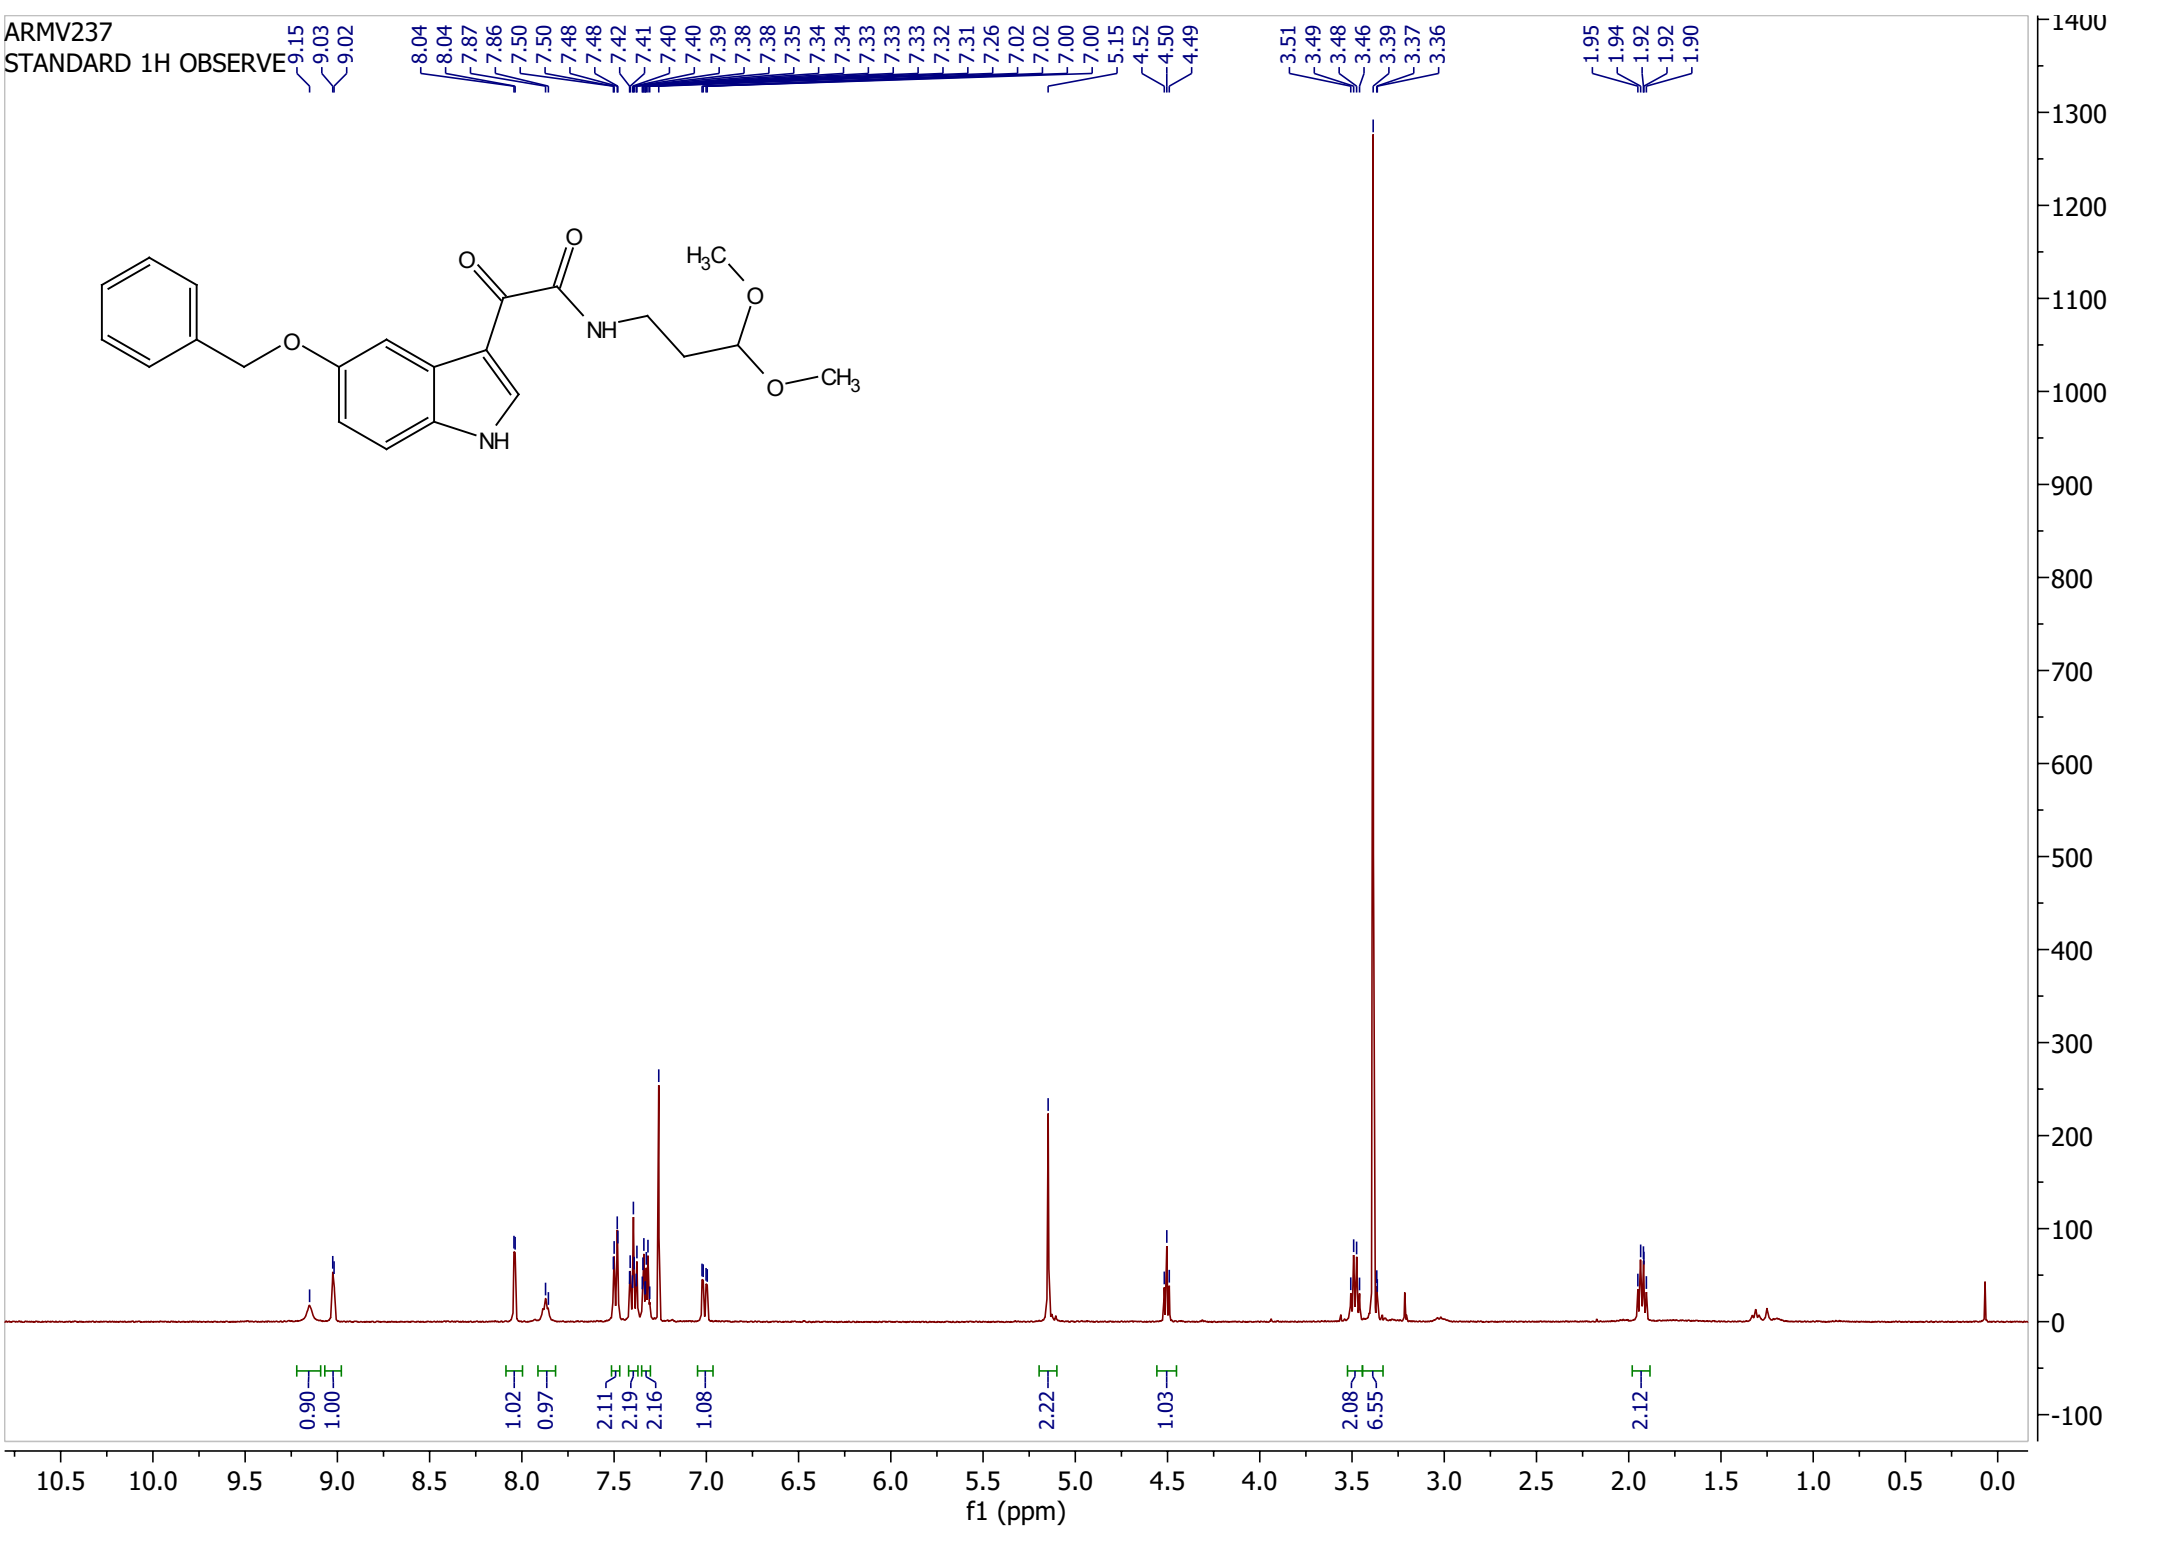

ARMV227B\_01

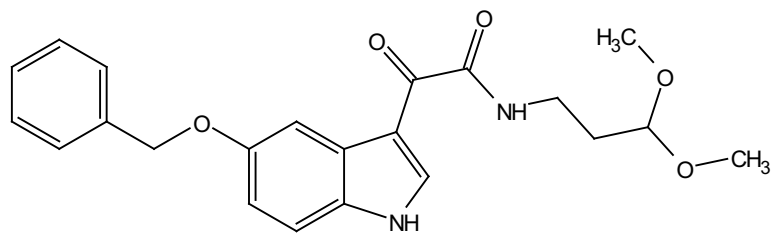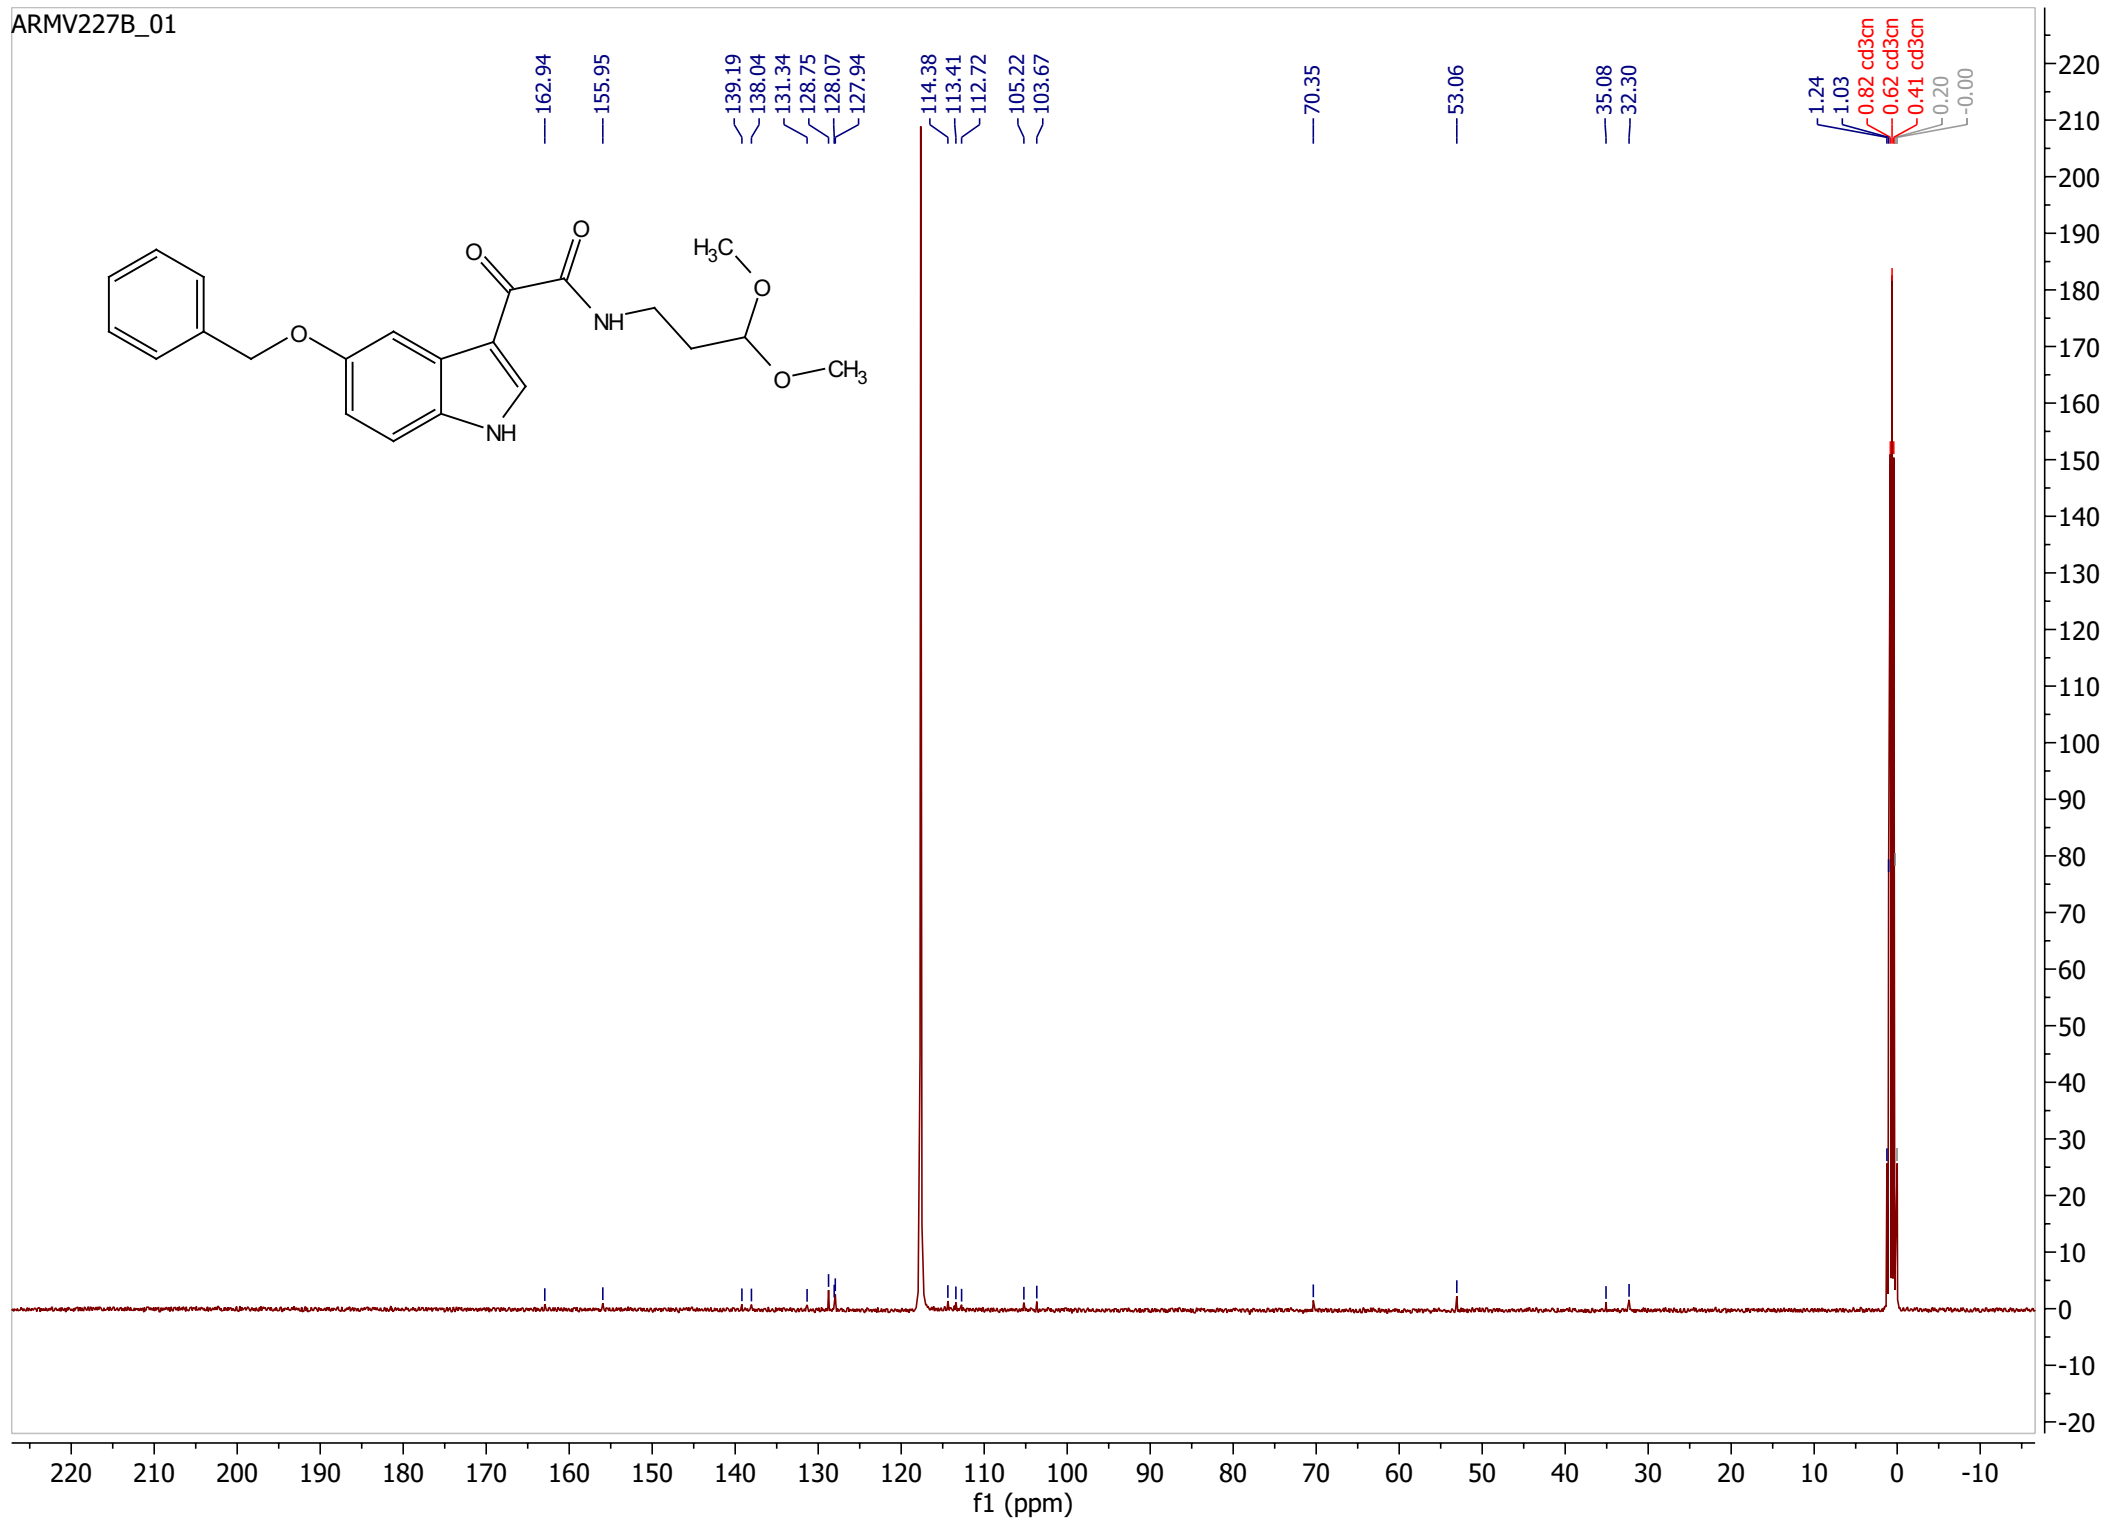

PROTON\_01  
ARMVII119

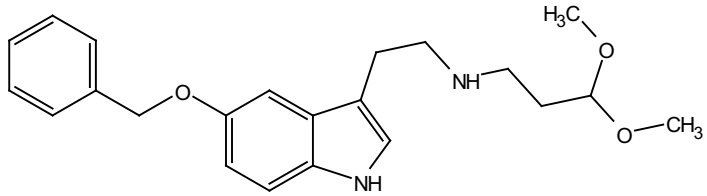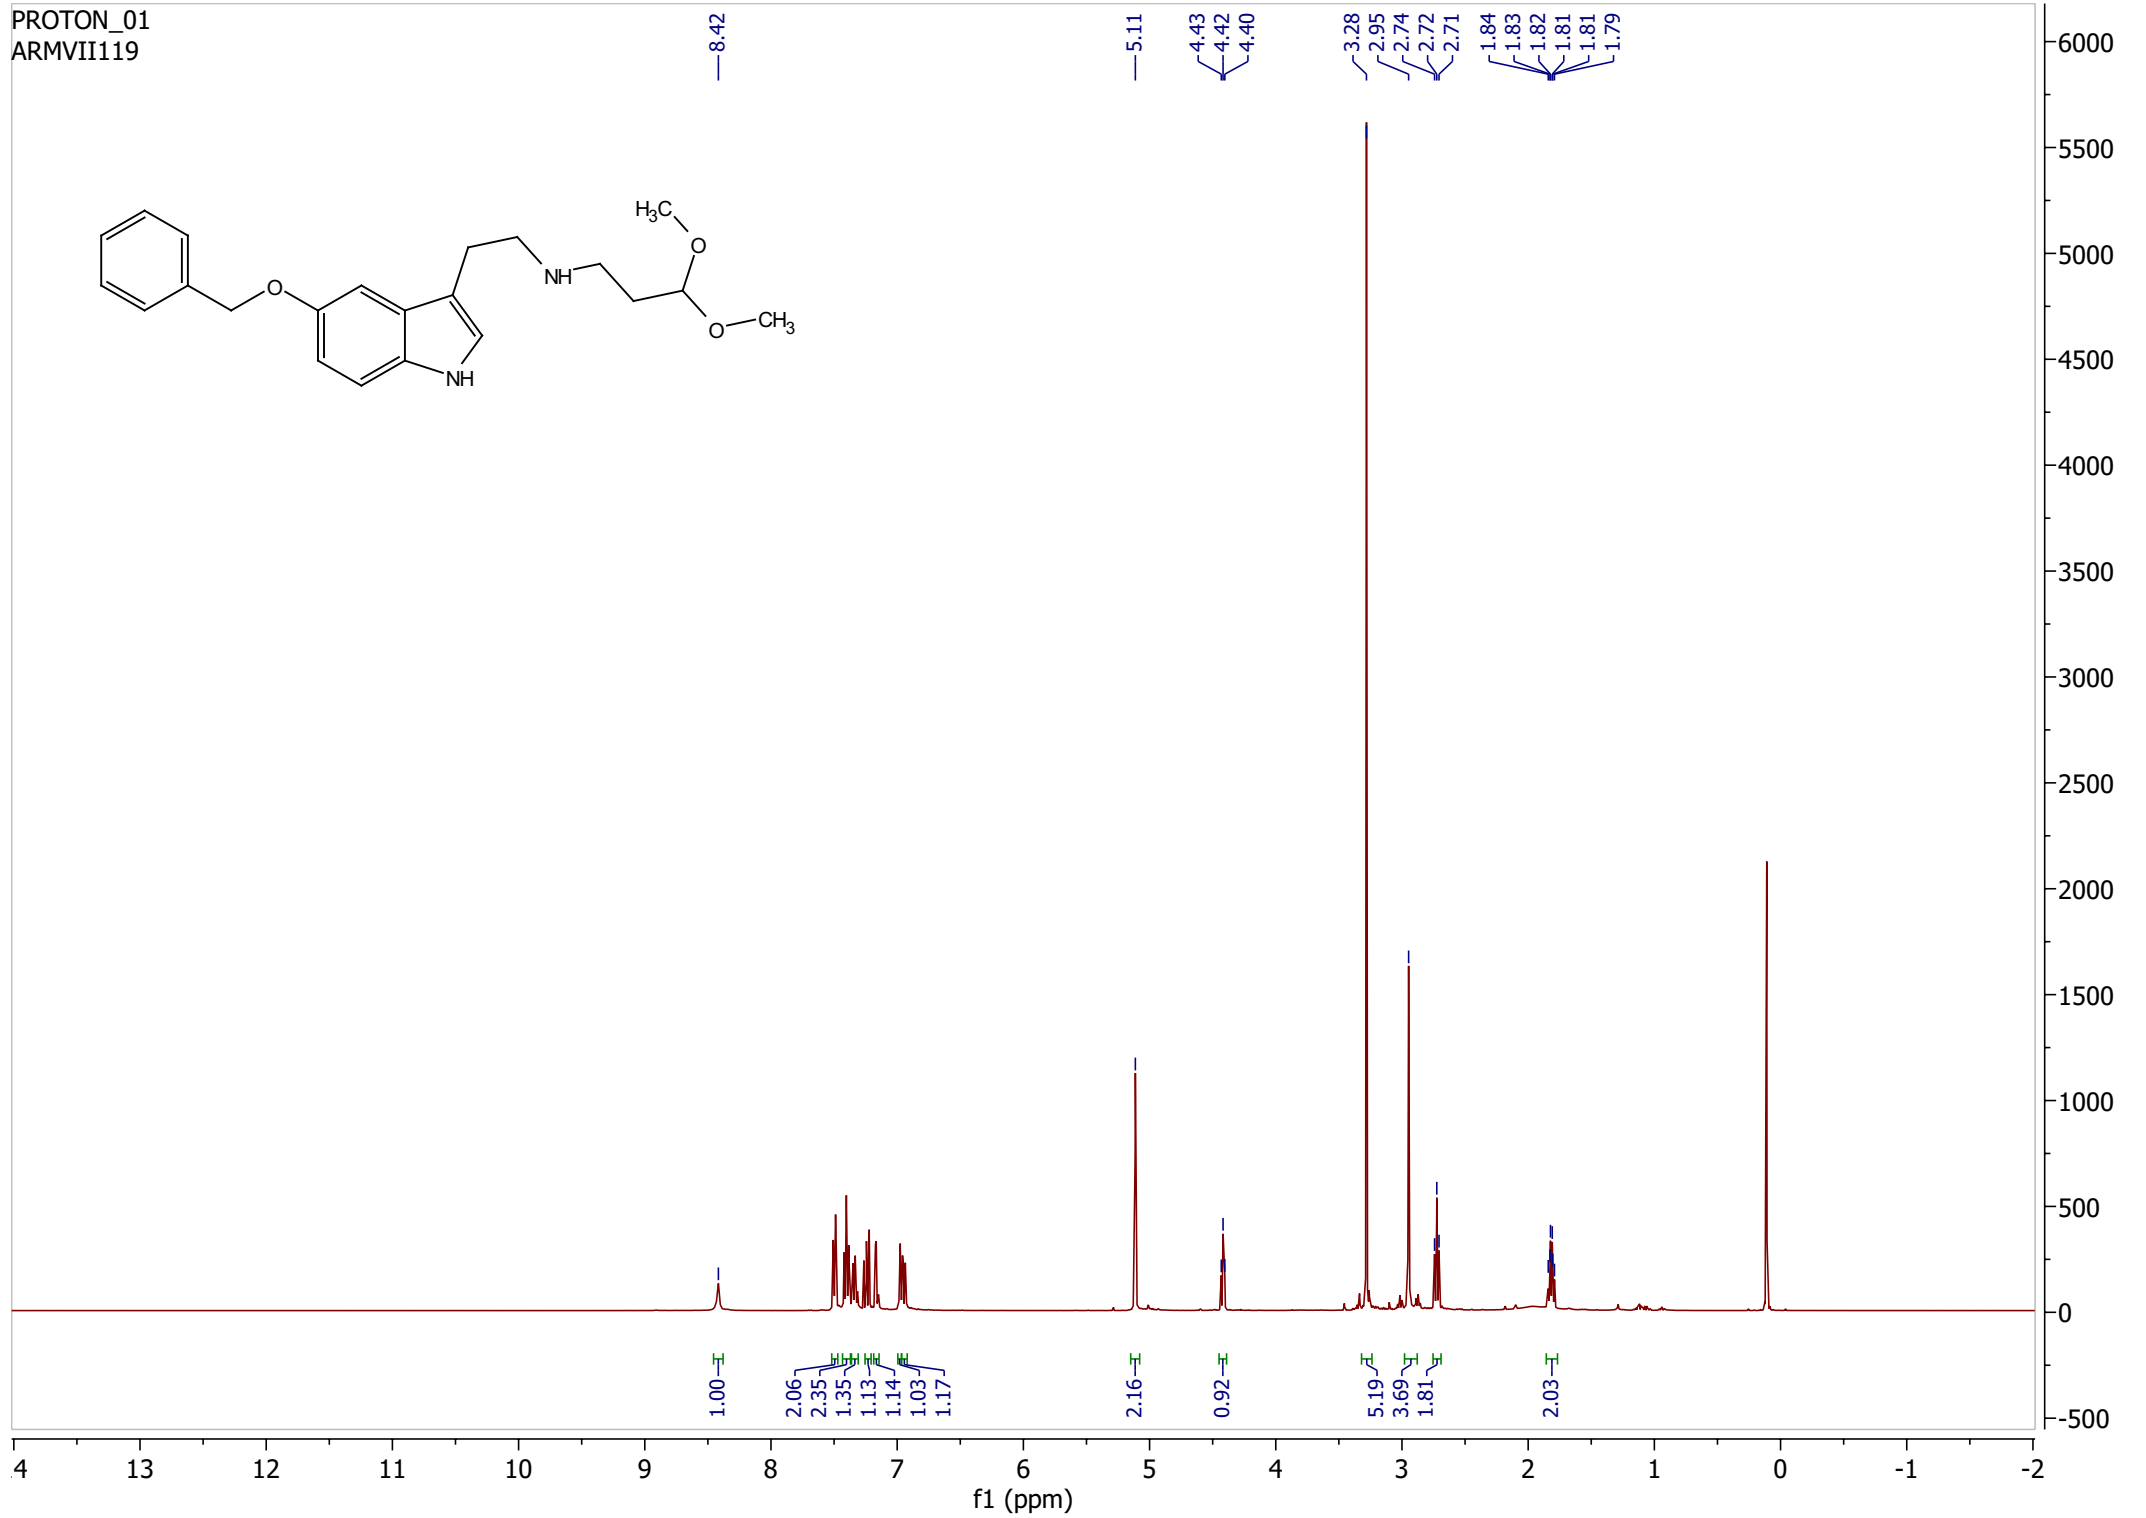

CARBON\_01  
ARMVII119

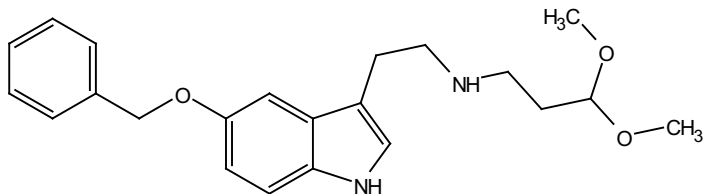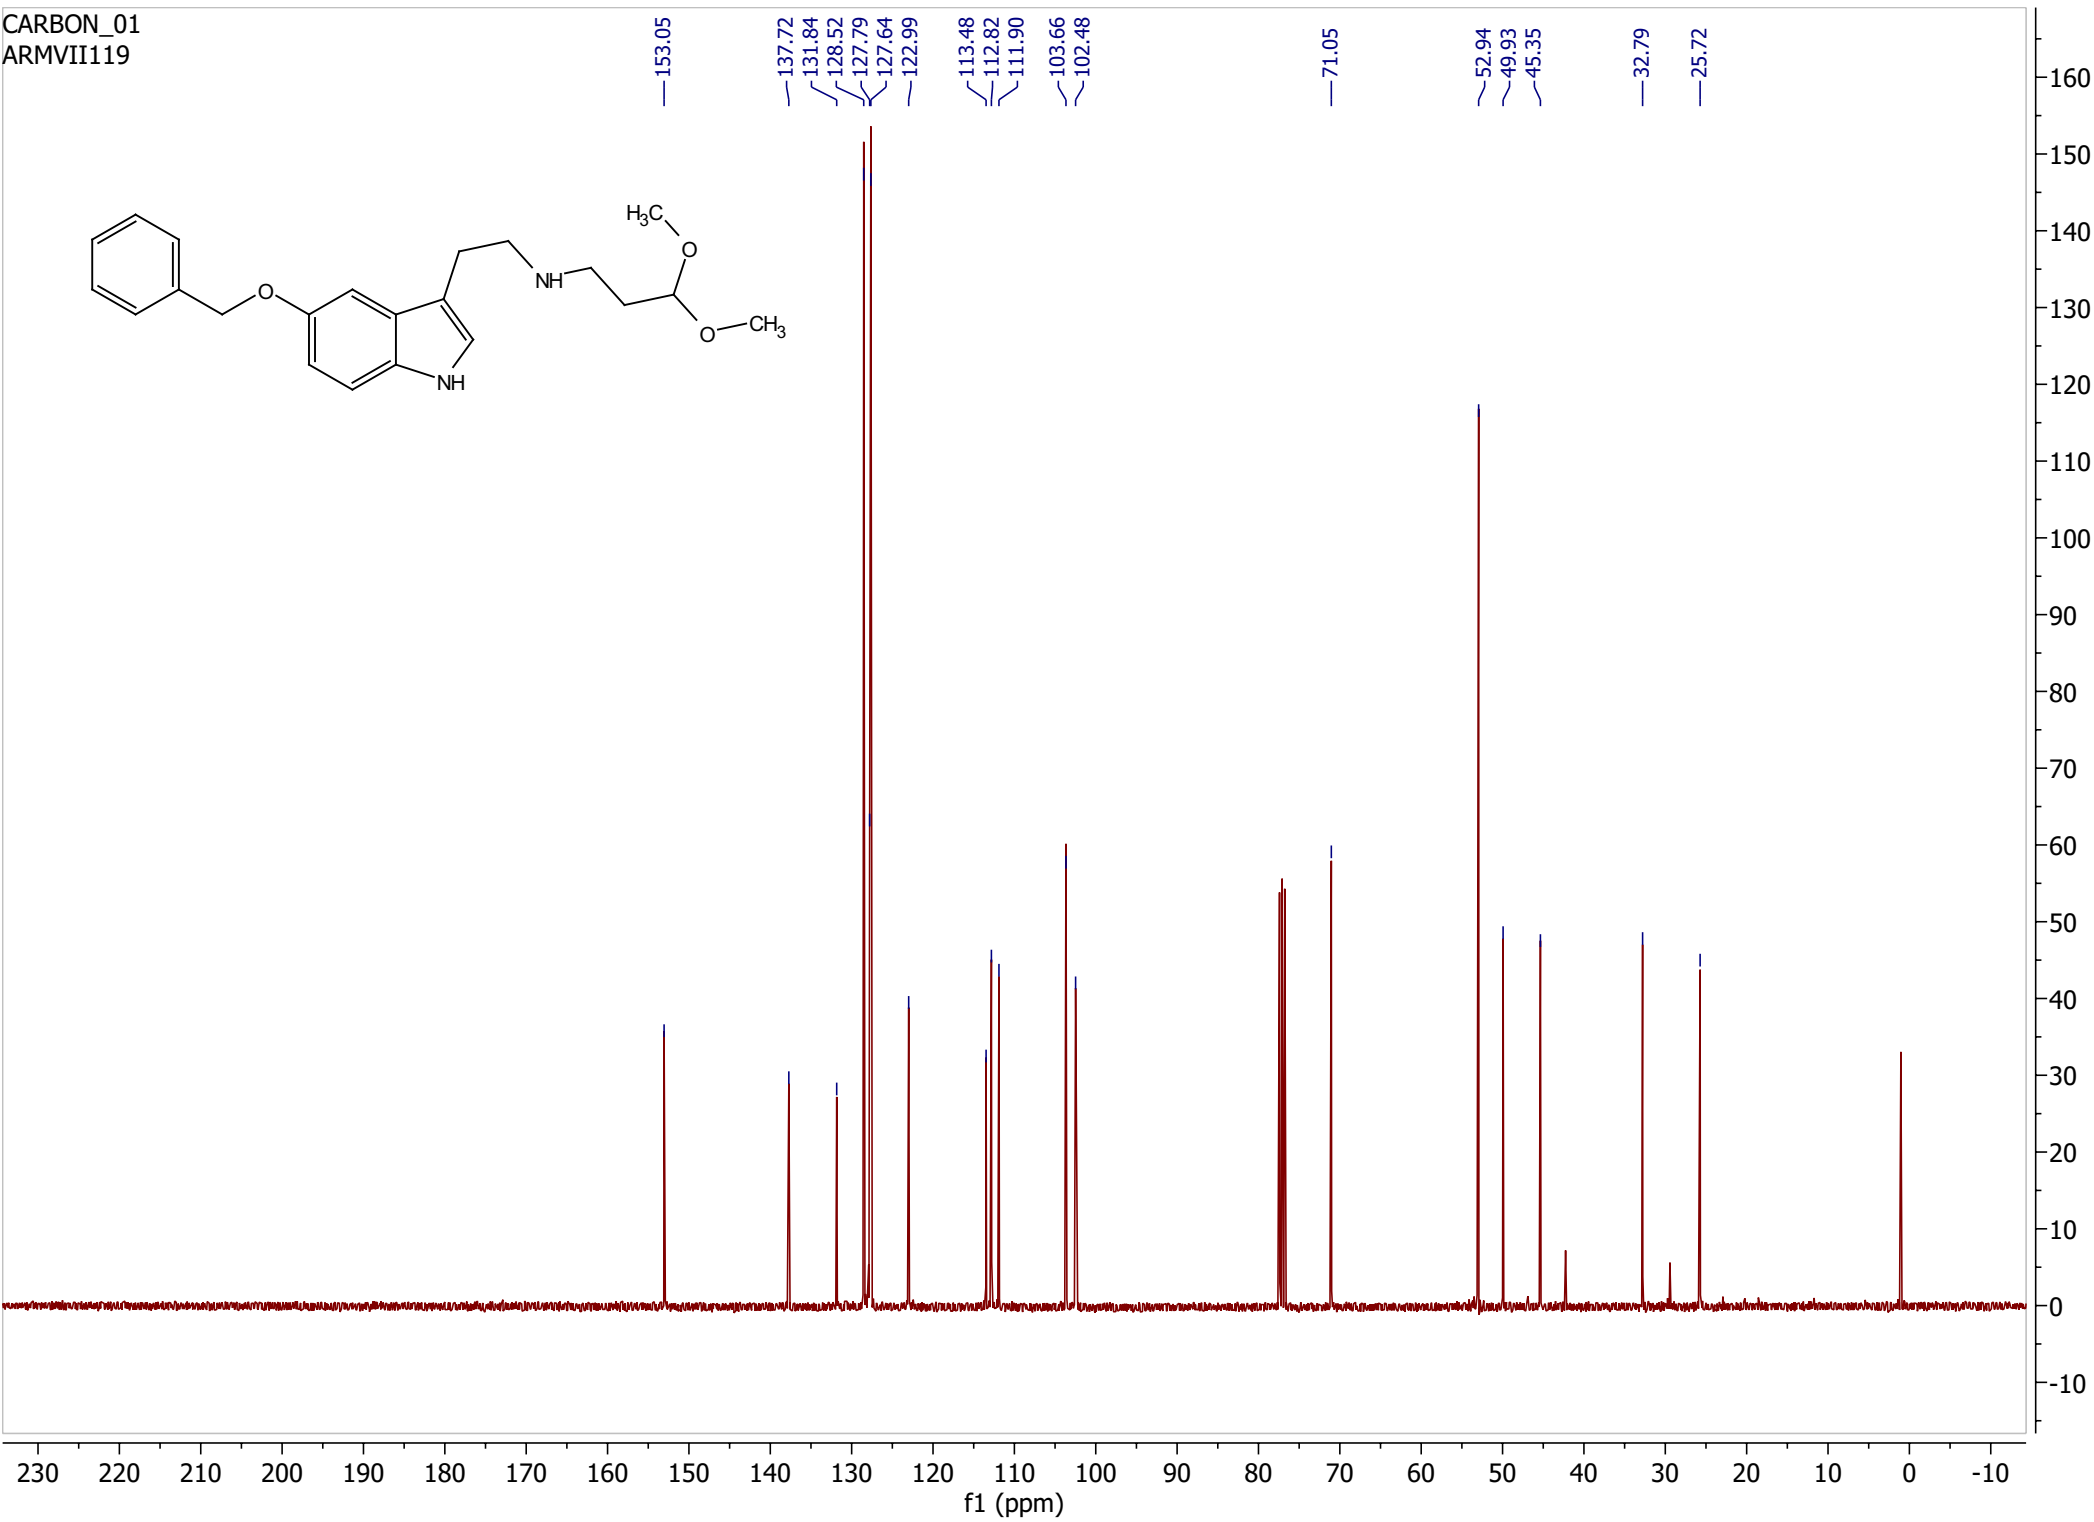

ARMV259A\_01

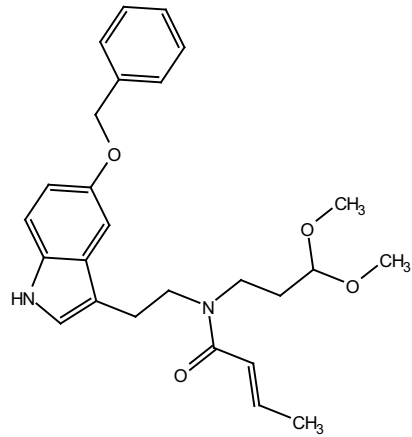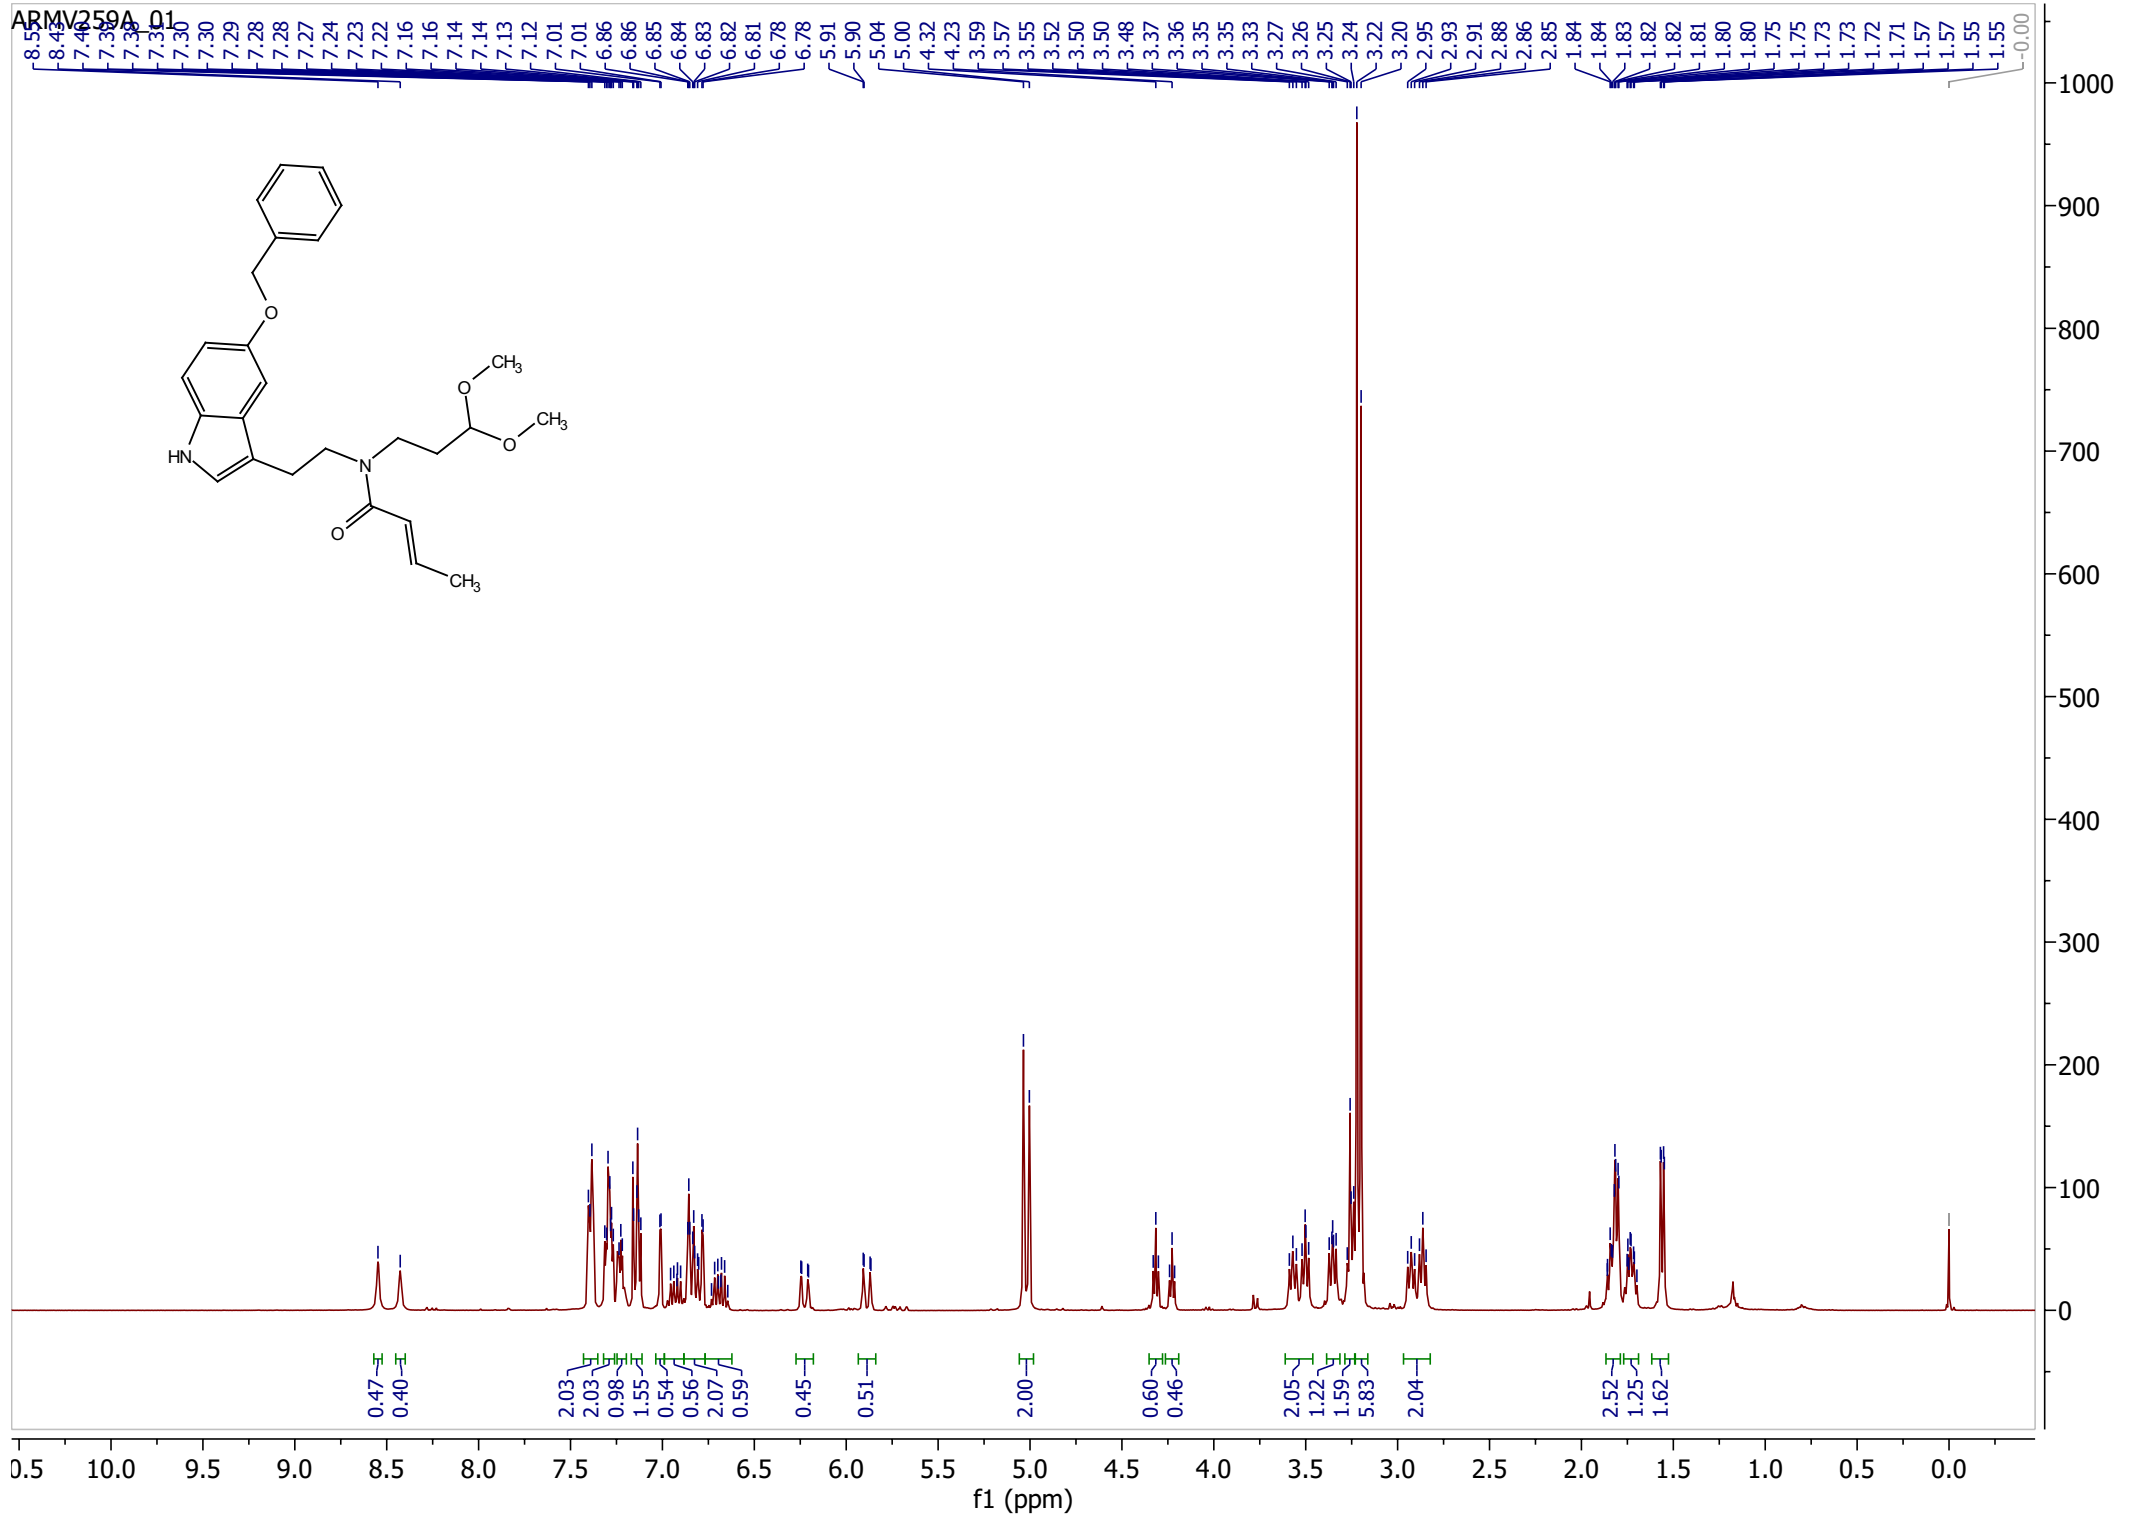



ARMV259A\_02

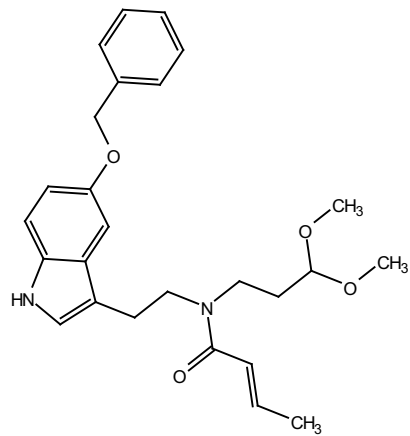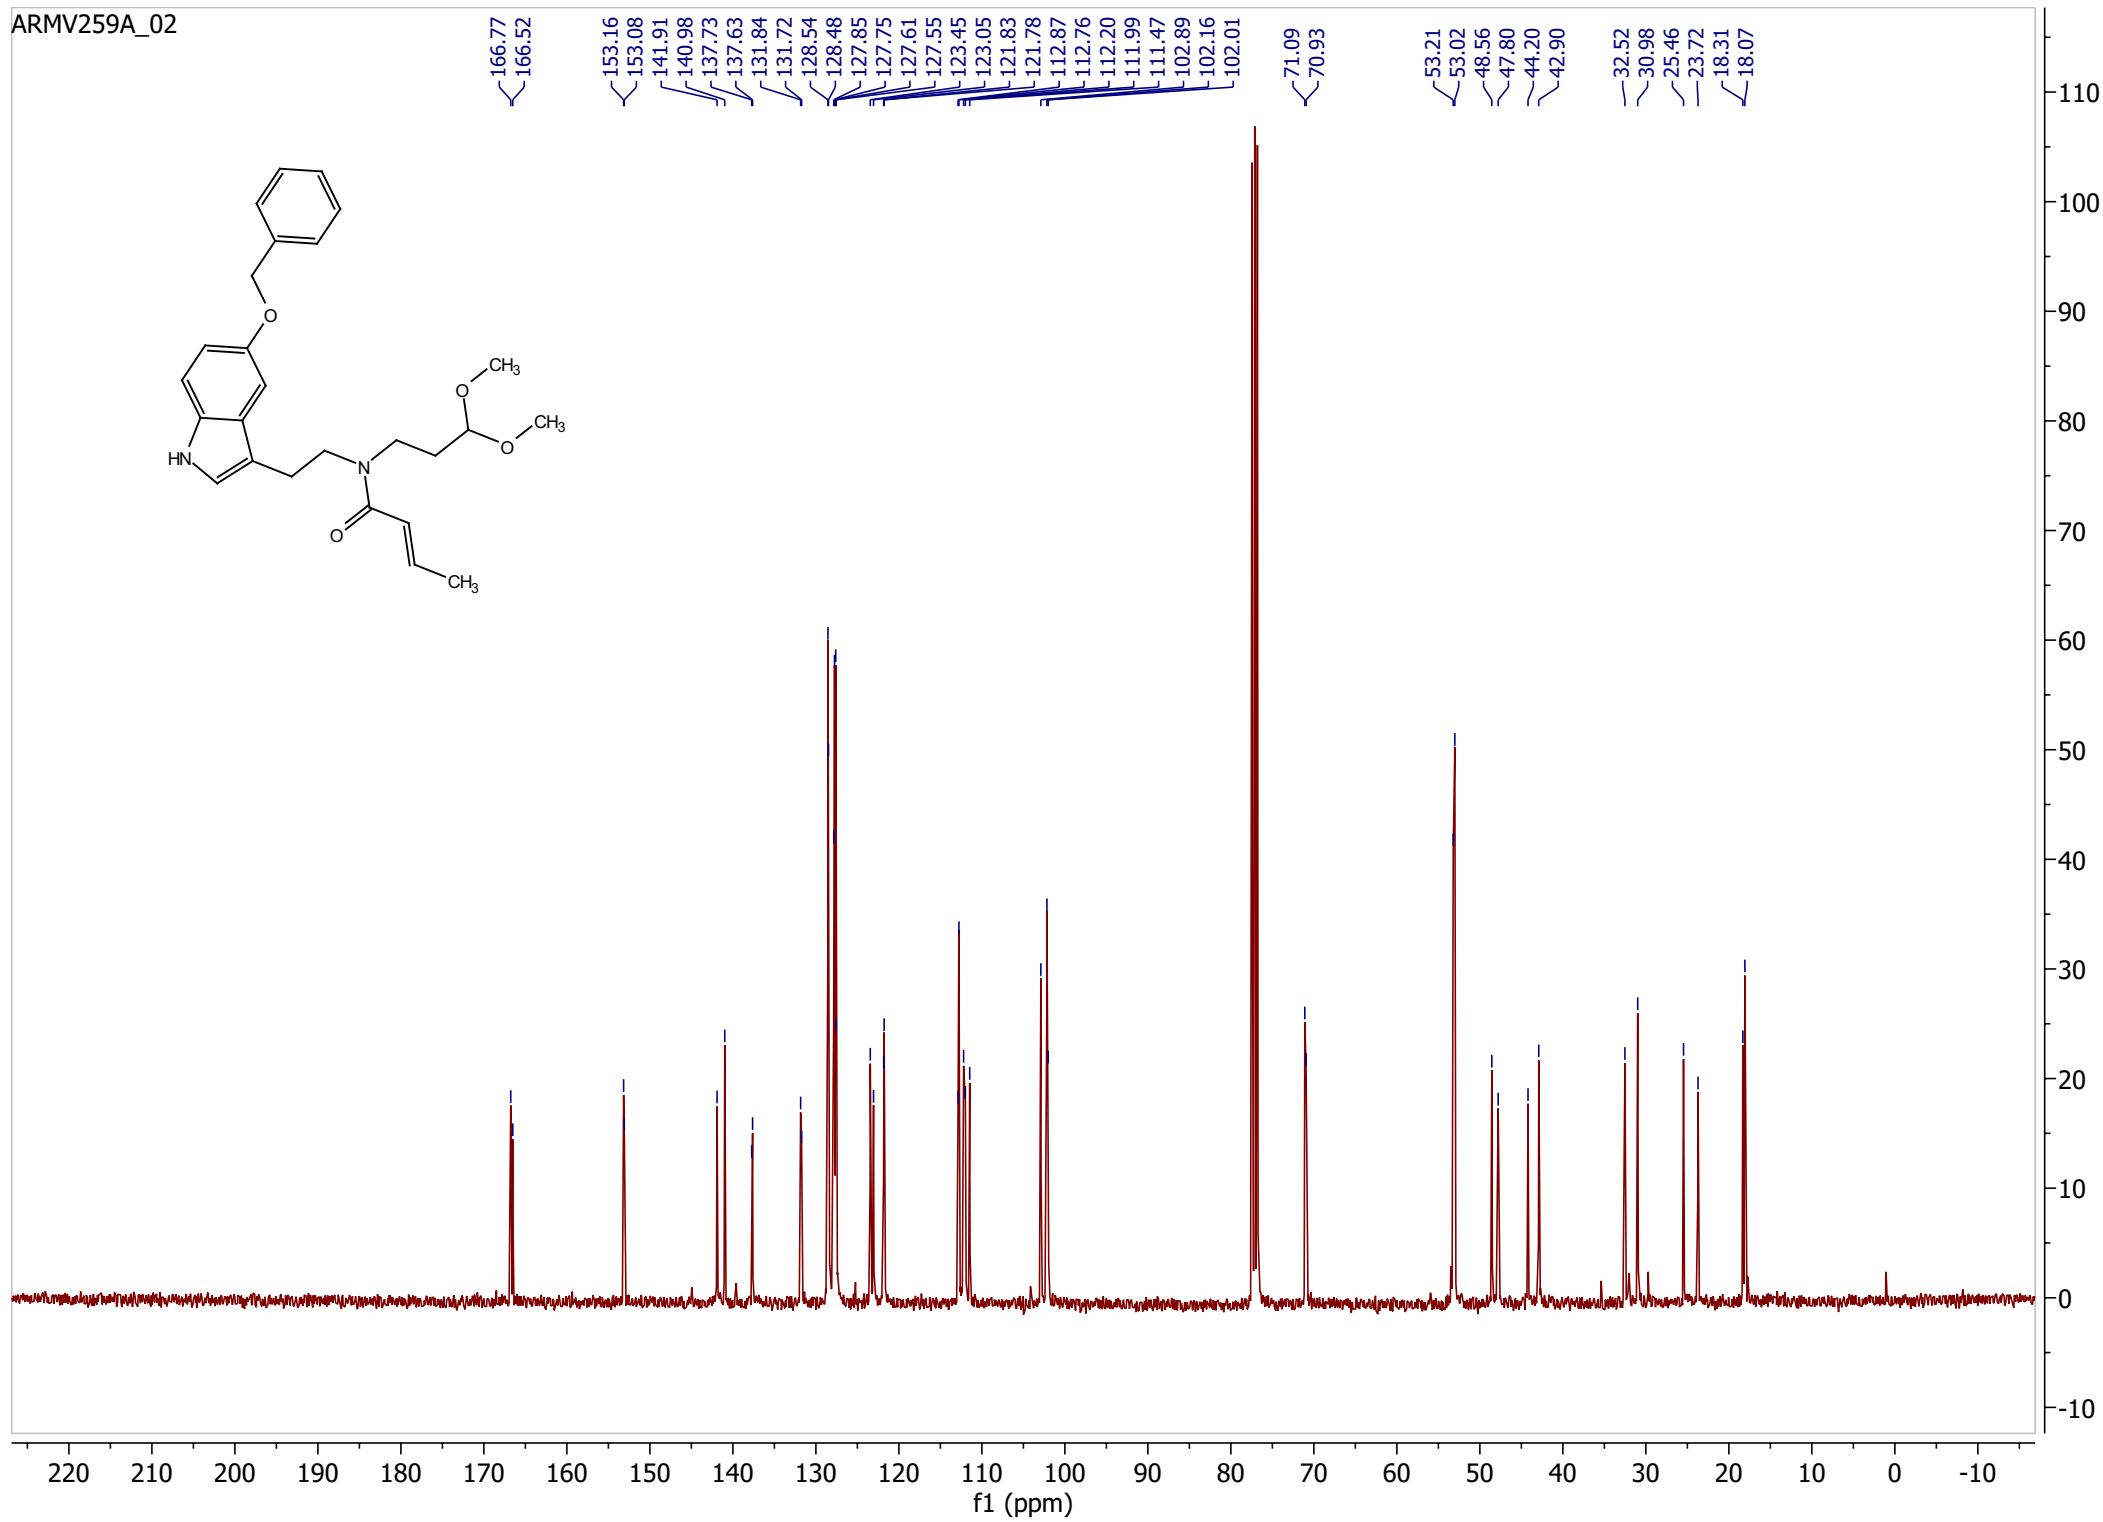

ARMV268  
STANDARD 1H OBSERVE

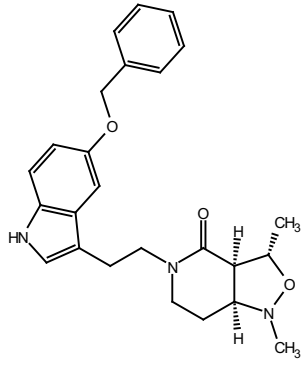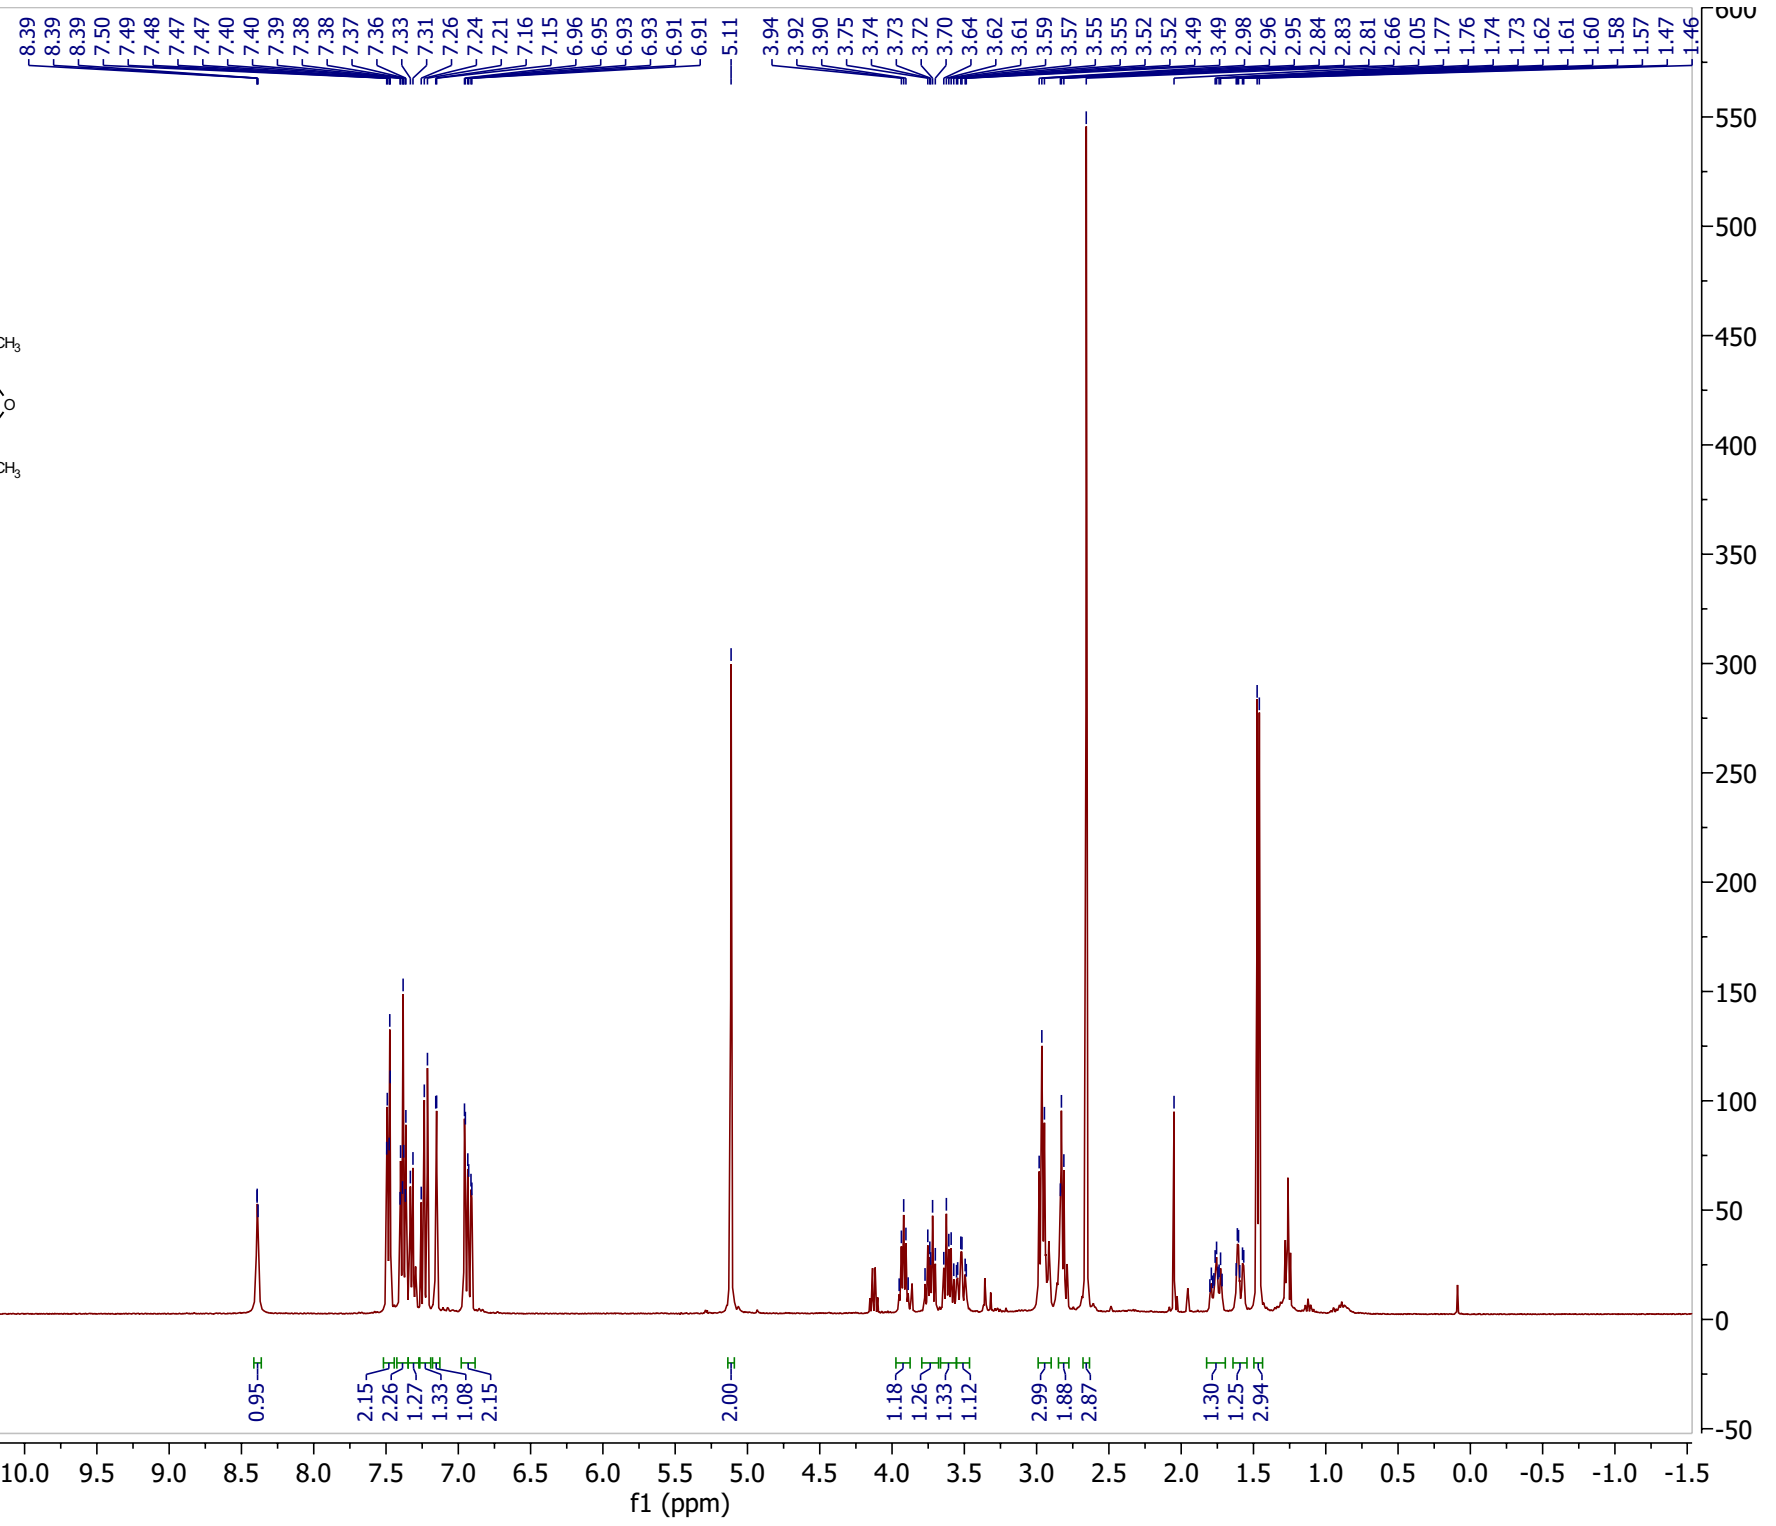

ARMV268\_02 1

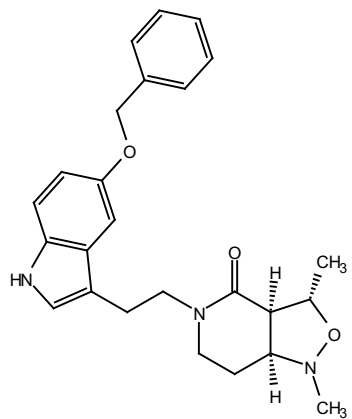

— 169.04

— 153.02

— 137.72

— 131.75

— 128.50

— 127.78

— 127.72

— 127.68

— 123.10

— 112.71

— 112.38

— 112.03

— 102.33

— 71.02

— 66.11

— 55.35

— 48.45

— 44.05

— 43.20

— 25.06

— 23.47

— 19.29

220 210 200 190 180 170 160 150 140 130 120 110 100 90 80 70 60 50 40 30 20 10 0 -10

f1 (ppm)

90  
80  
70  
60  
50  
40  
30  
20  
10  
0  
-10

APM 29301

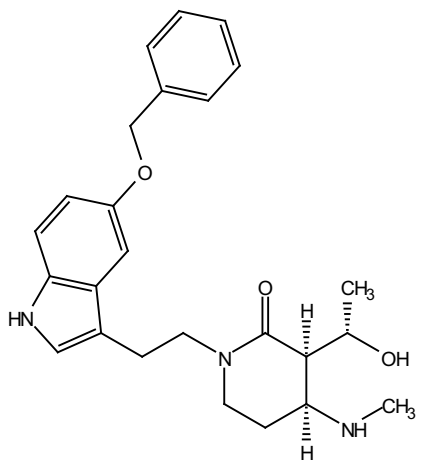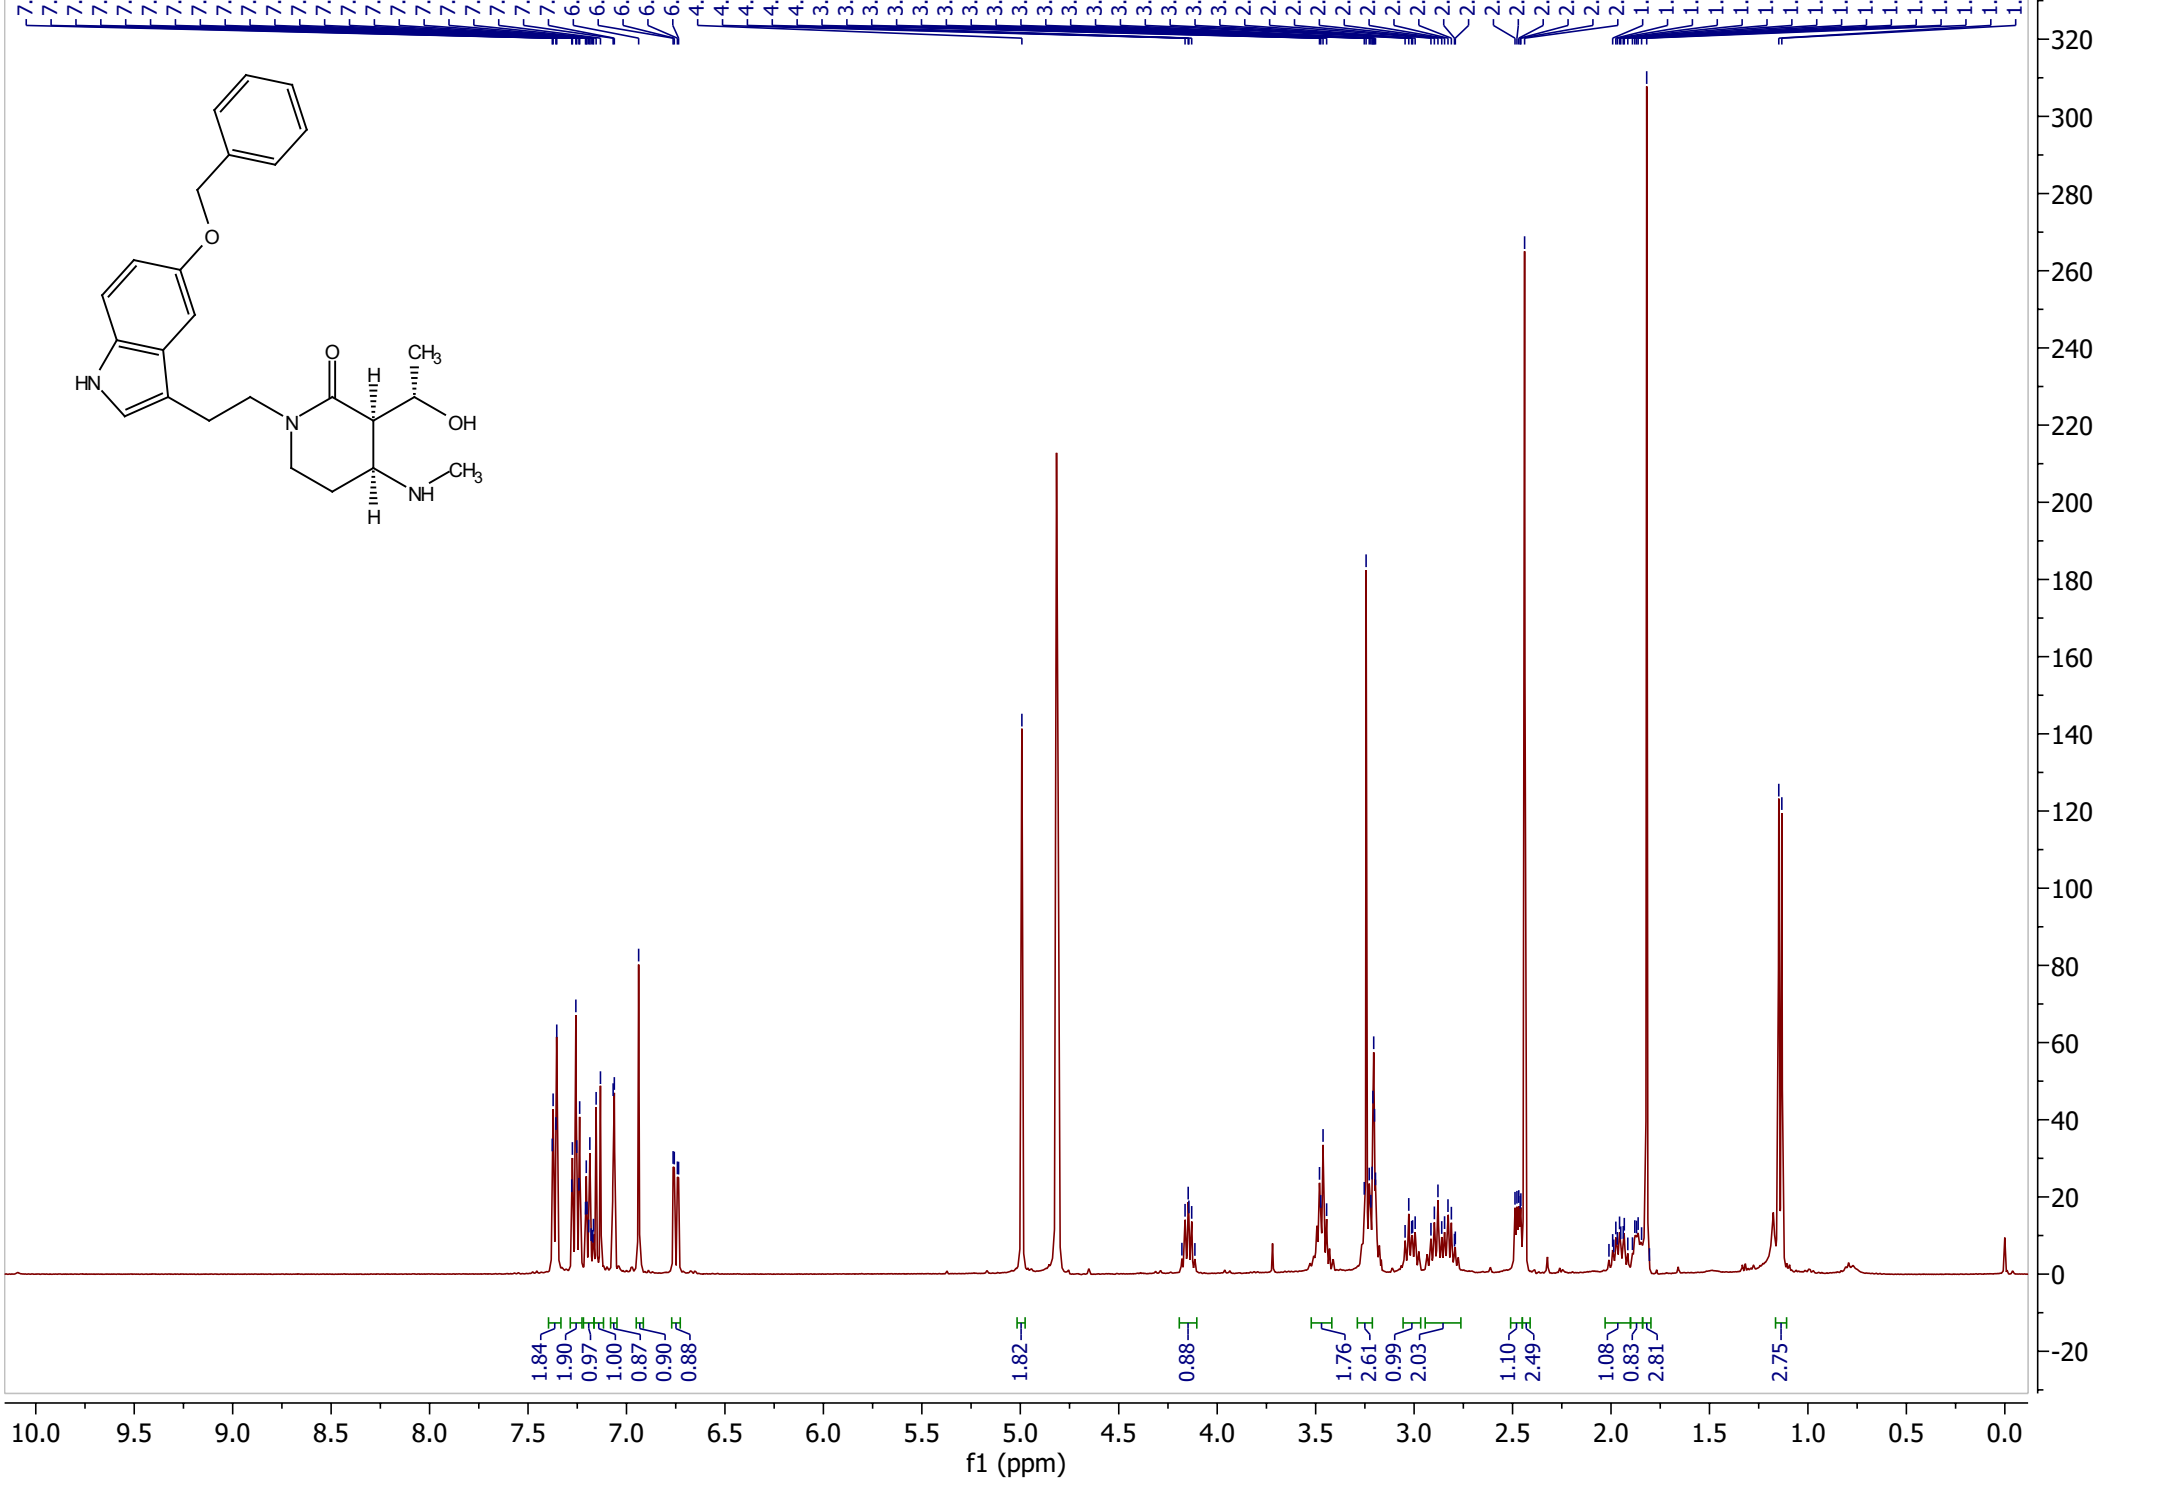

ARMV293\_03

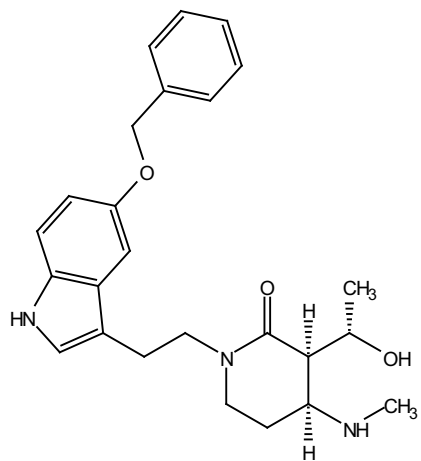

—168.03

—152.62

—138.01

132.16

128.03

127.75

127.32

—123.21

111.96

111.69

111.20

—101.90

—70.70

—65.76

—55.25

—31.08

22.22

21.63

21.55

220 210 200 190 180 170 160 150 140 130 120 110 100 90 80 70 60 50 40 30 20 10 0 -10

f1 (ppm)

110  
100  
90  
80  
70  
60  
50  
40  
30  
20  
10  
0  
-10

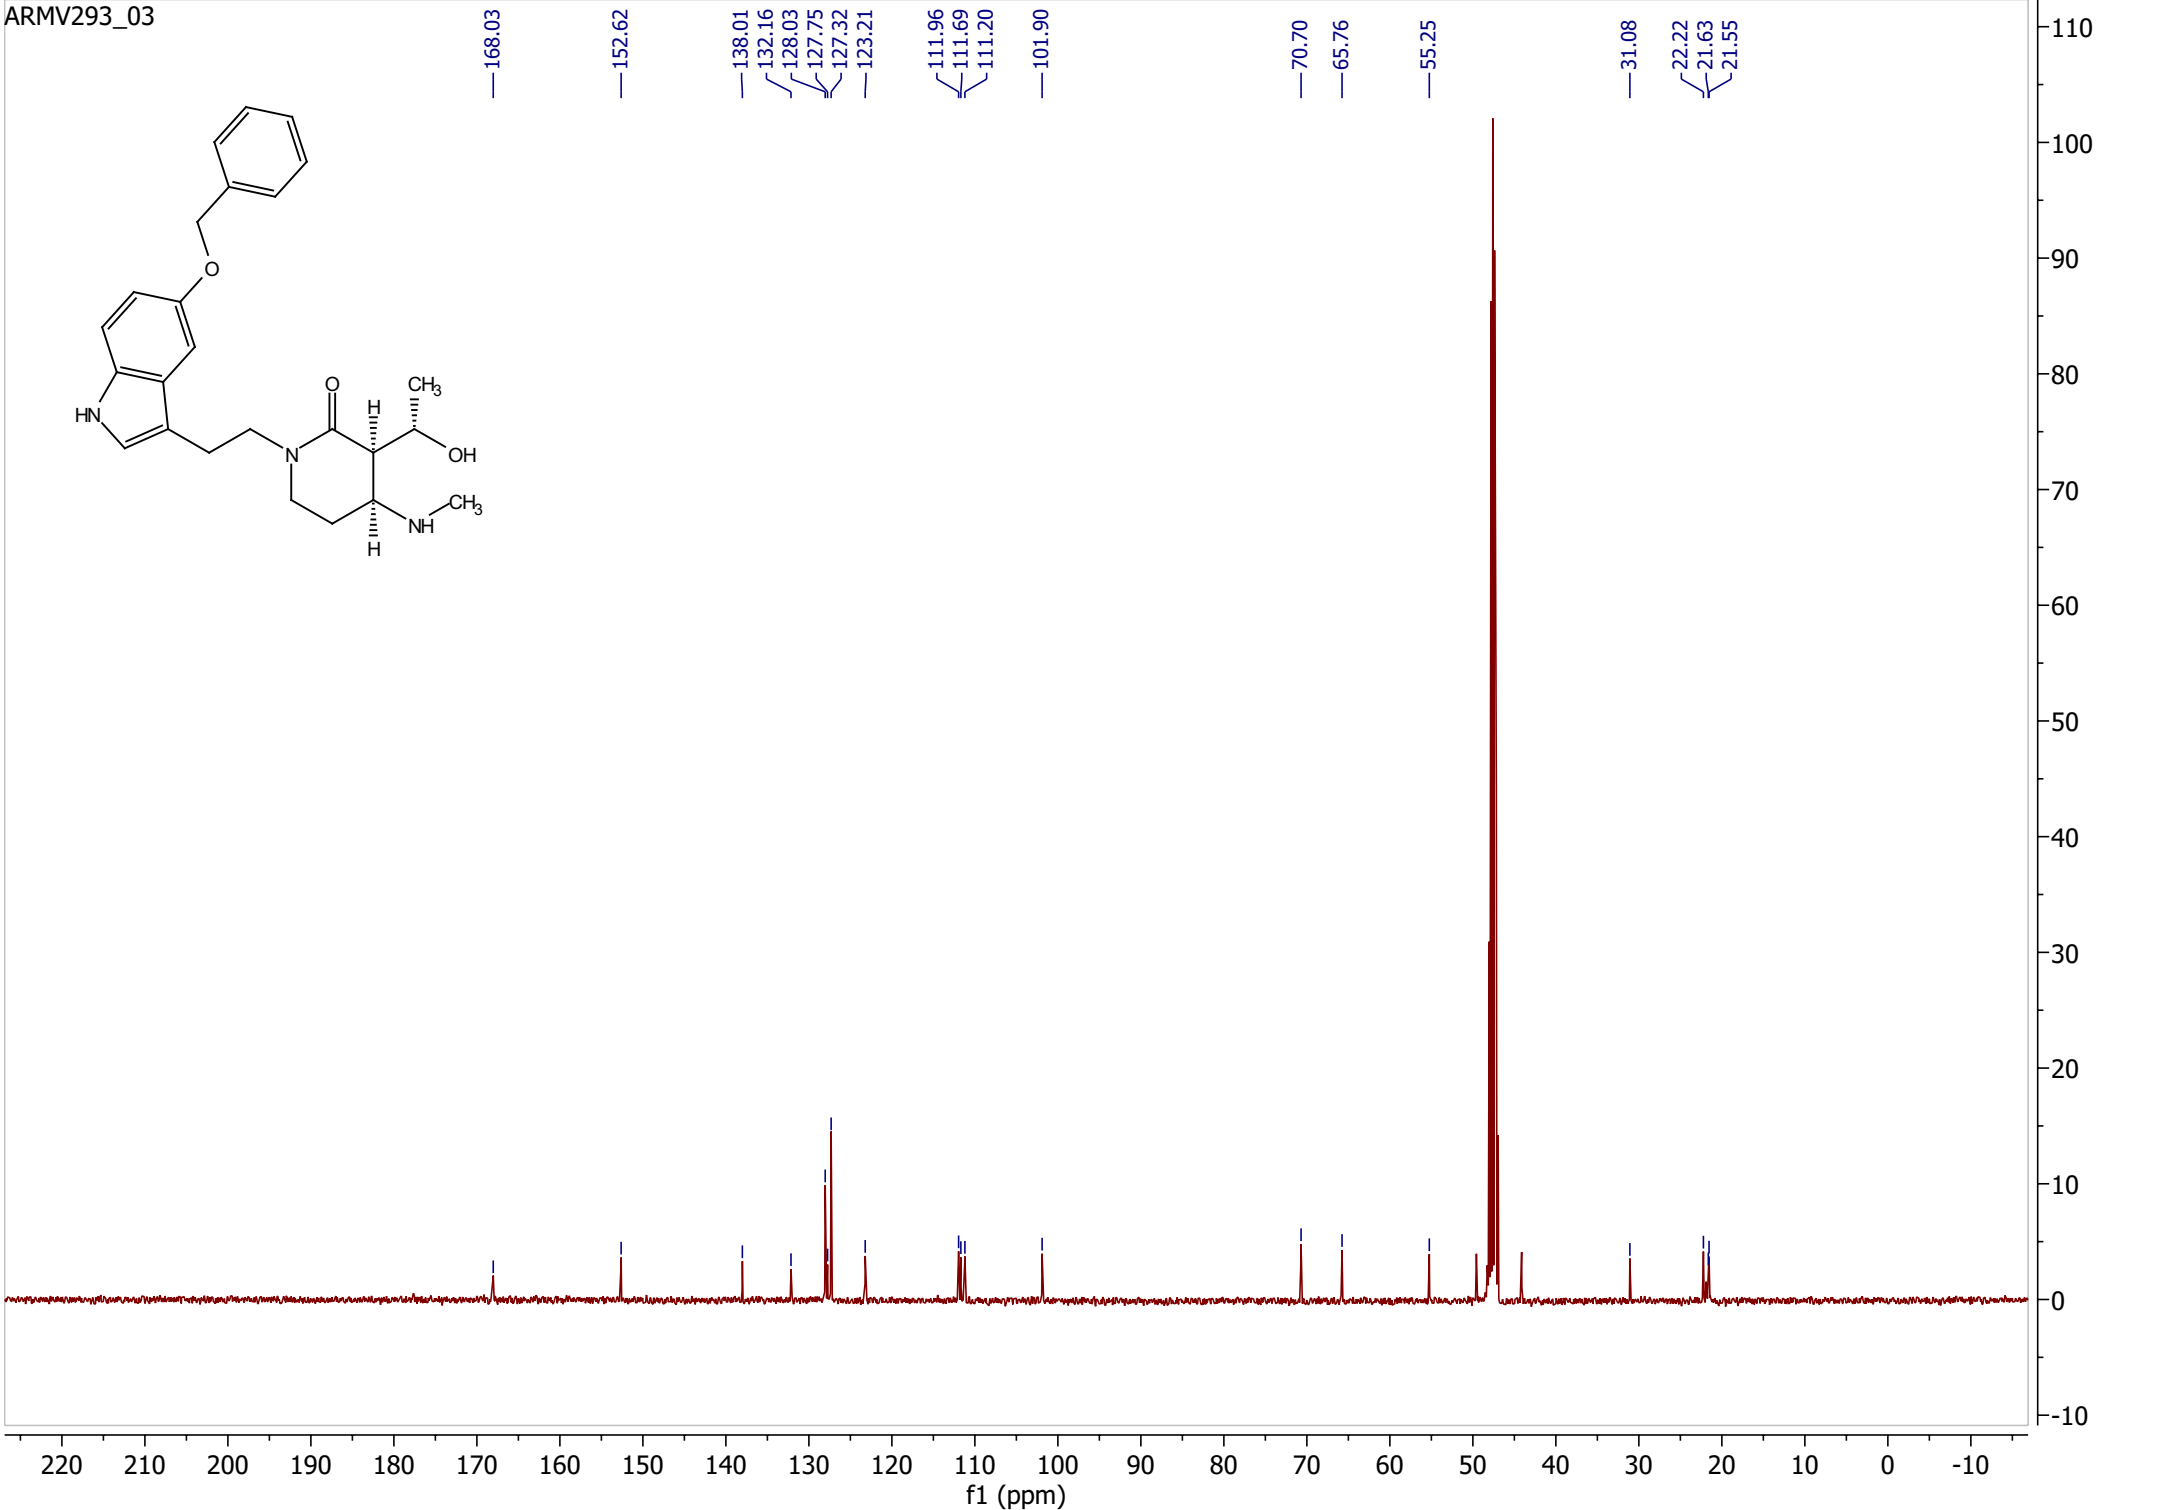

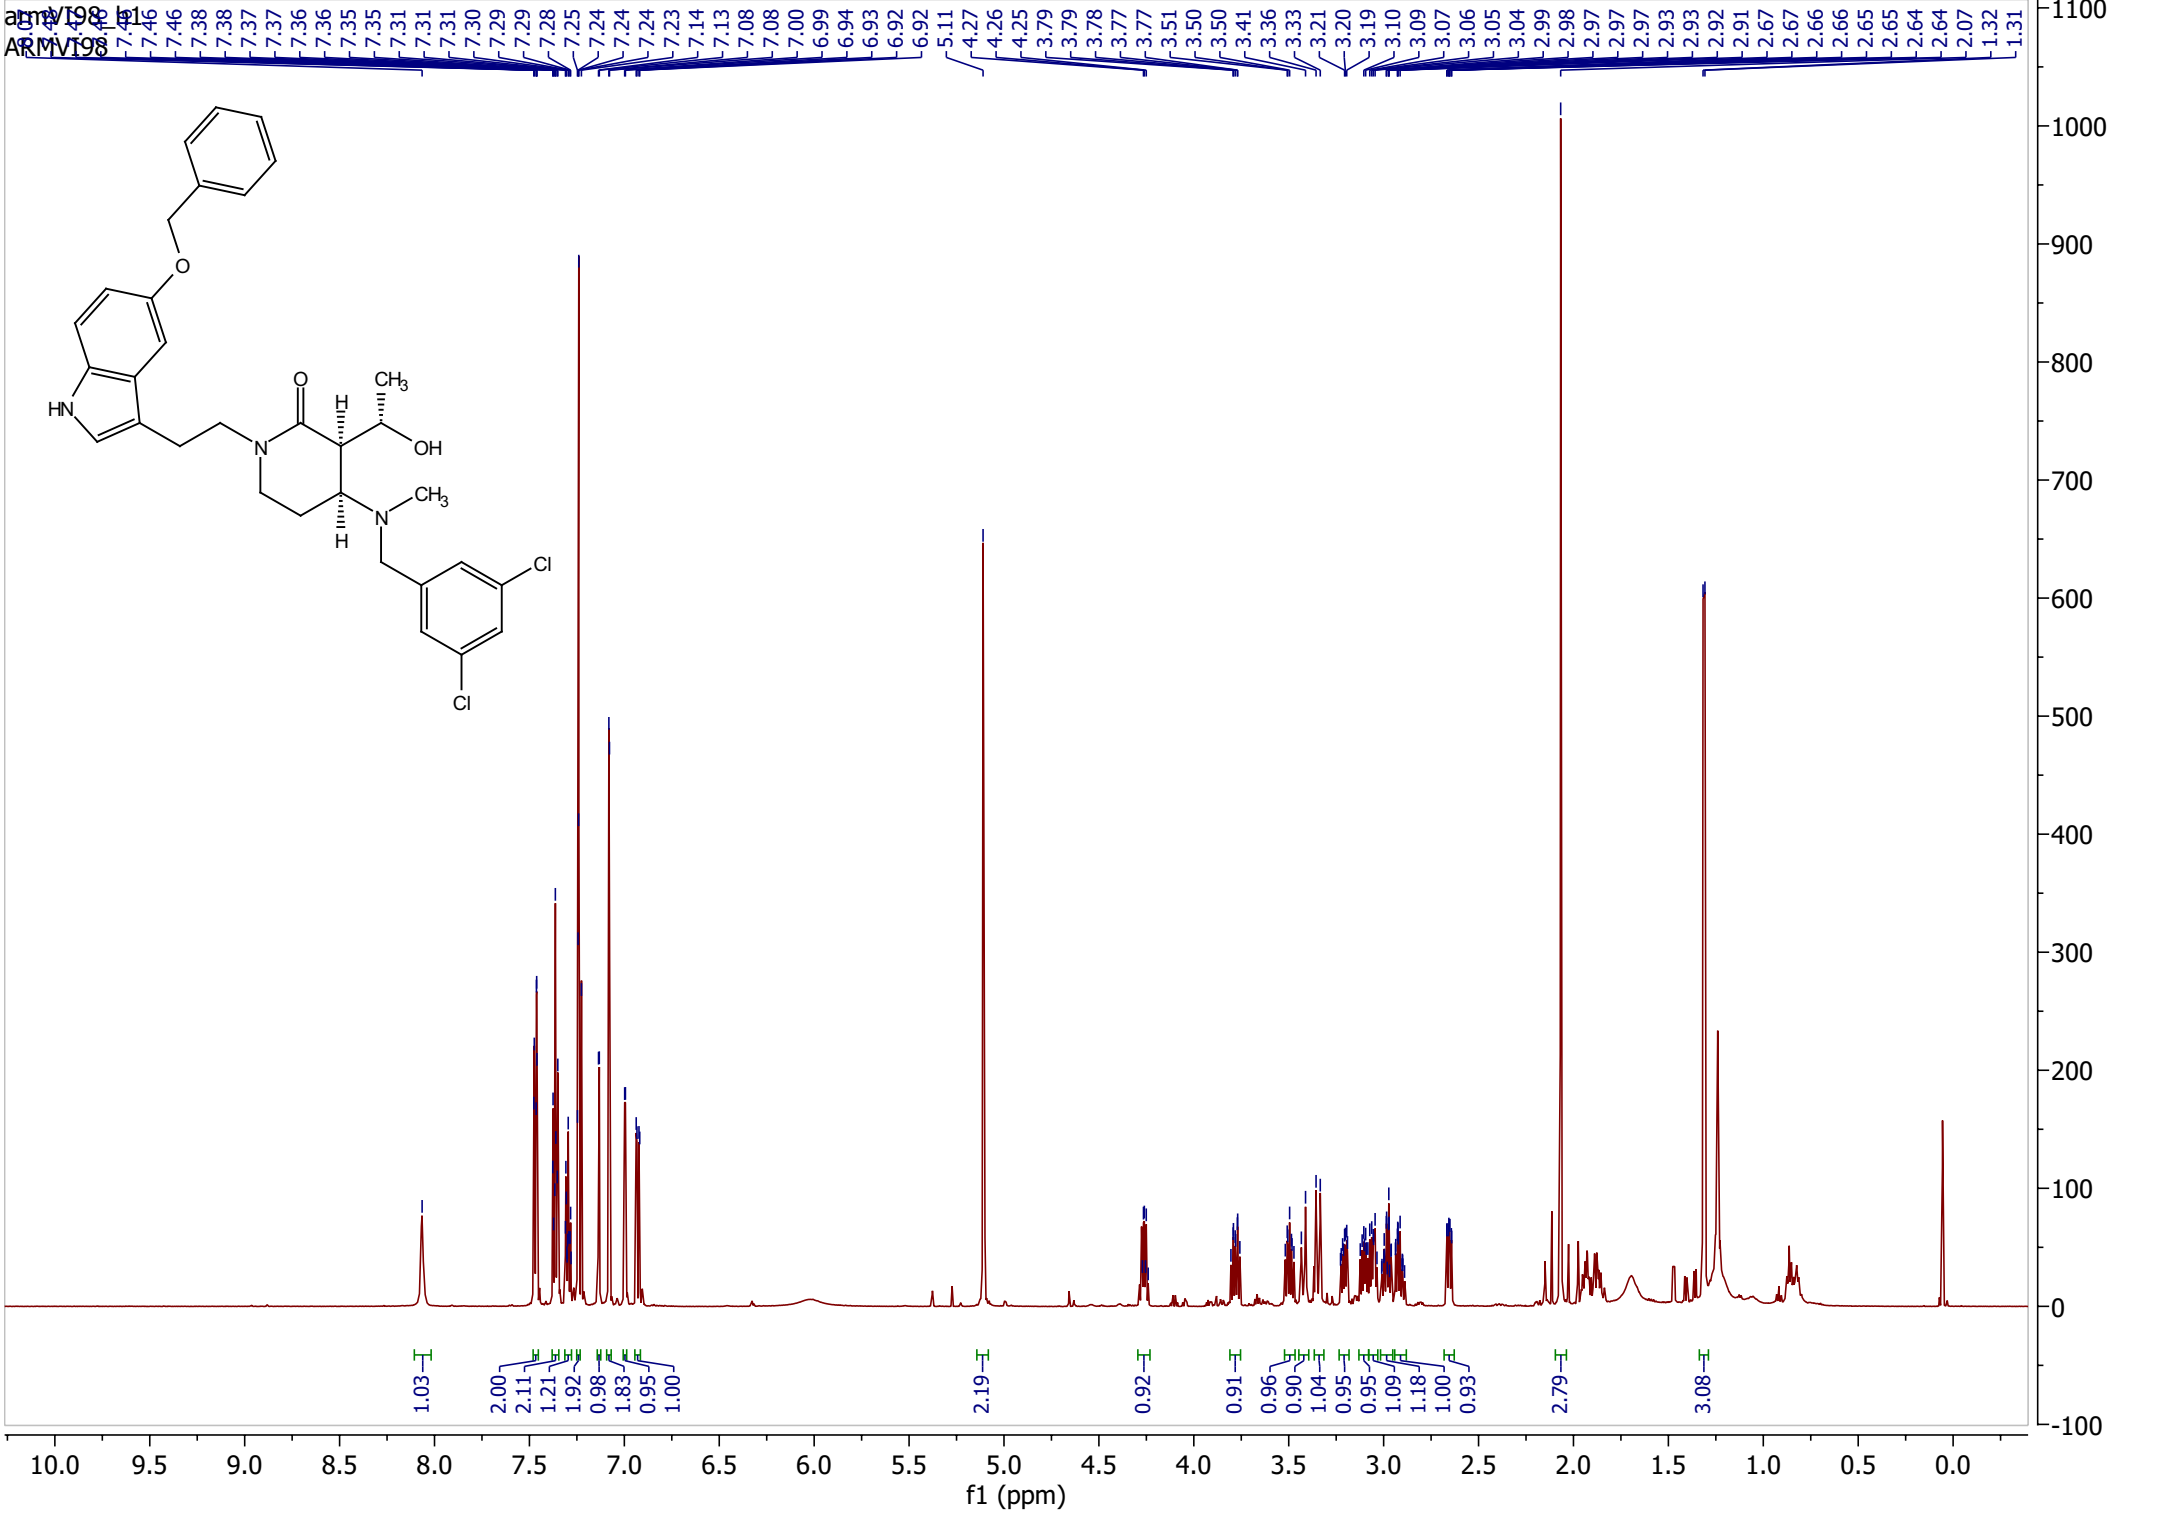

armVI98\_c13  
ARMVI98

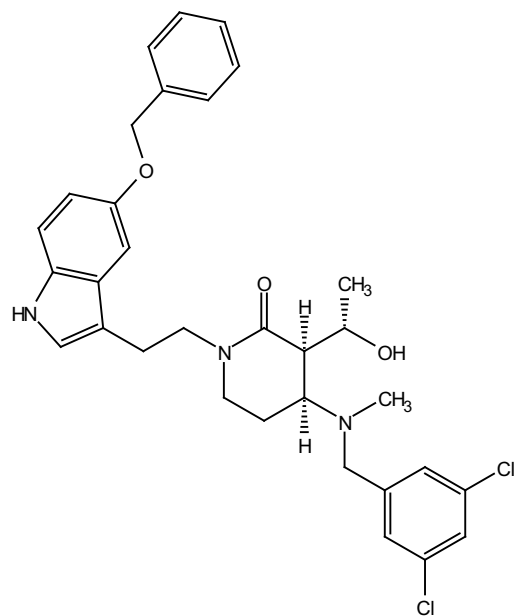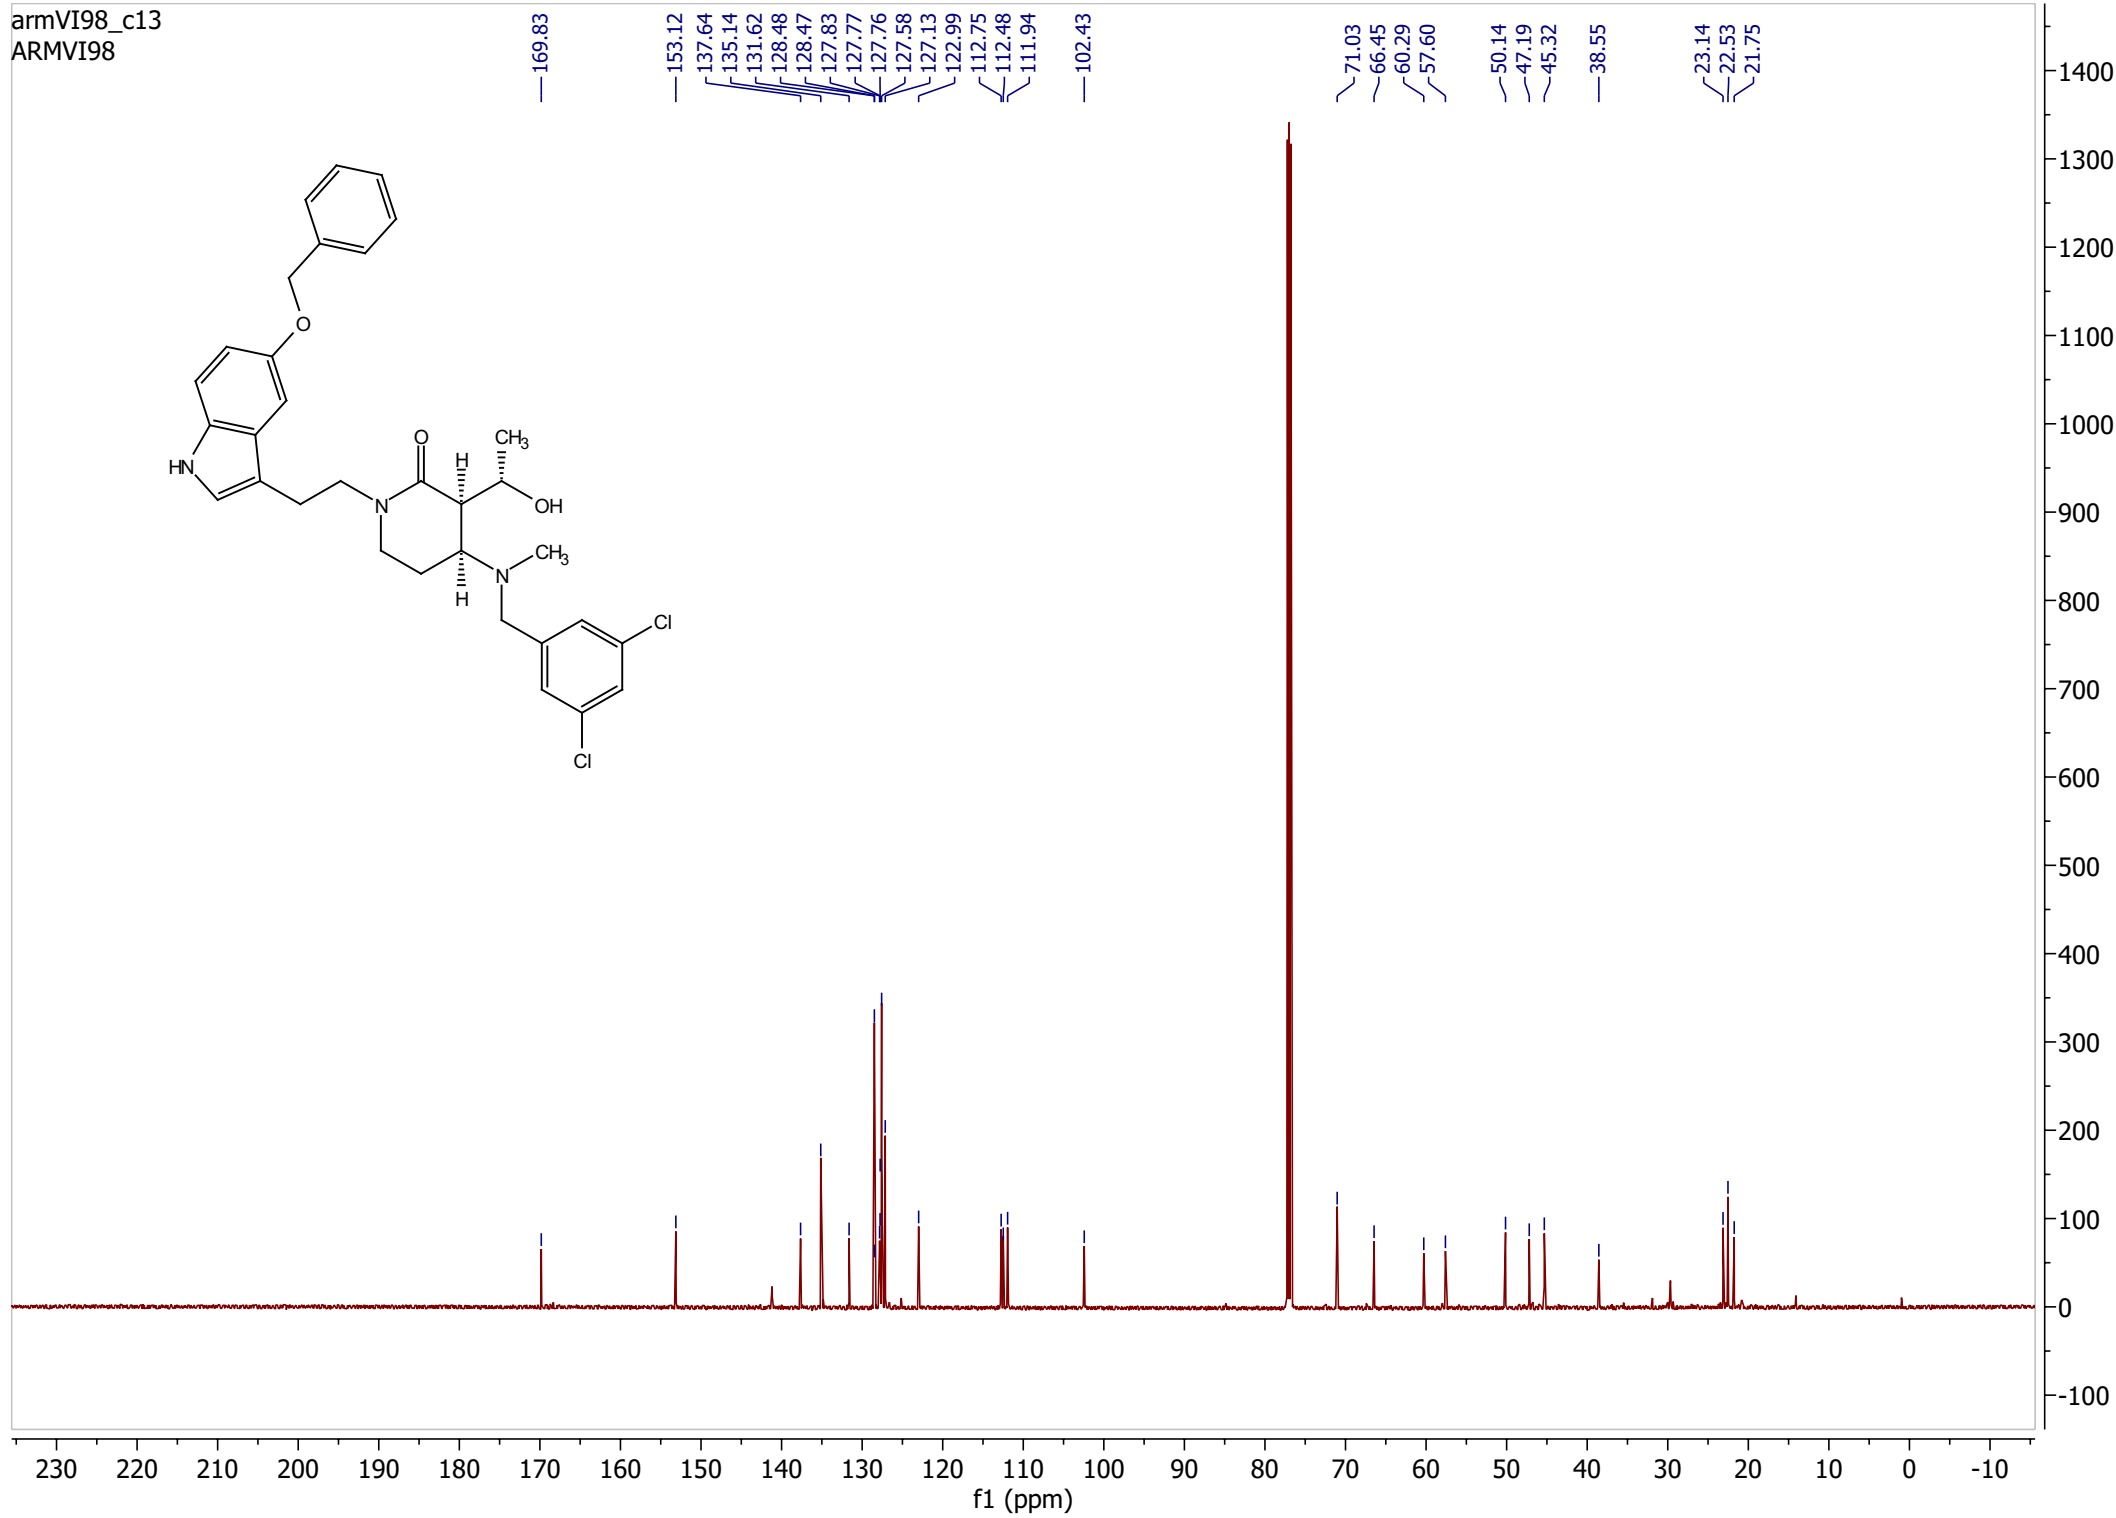

PROTON\_01  
ARMVII105A2

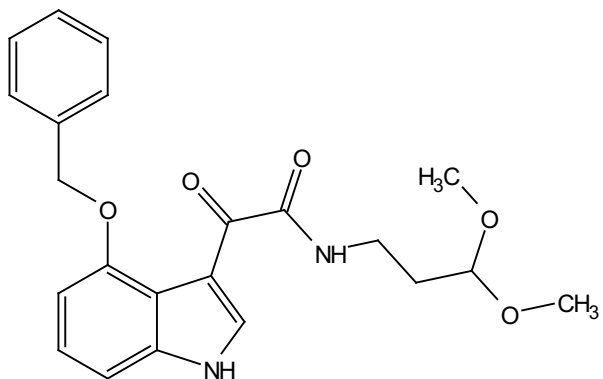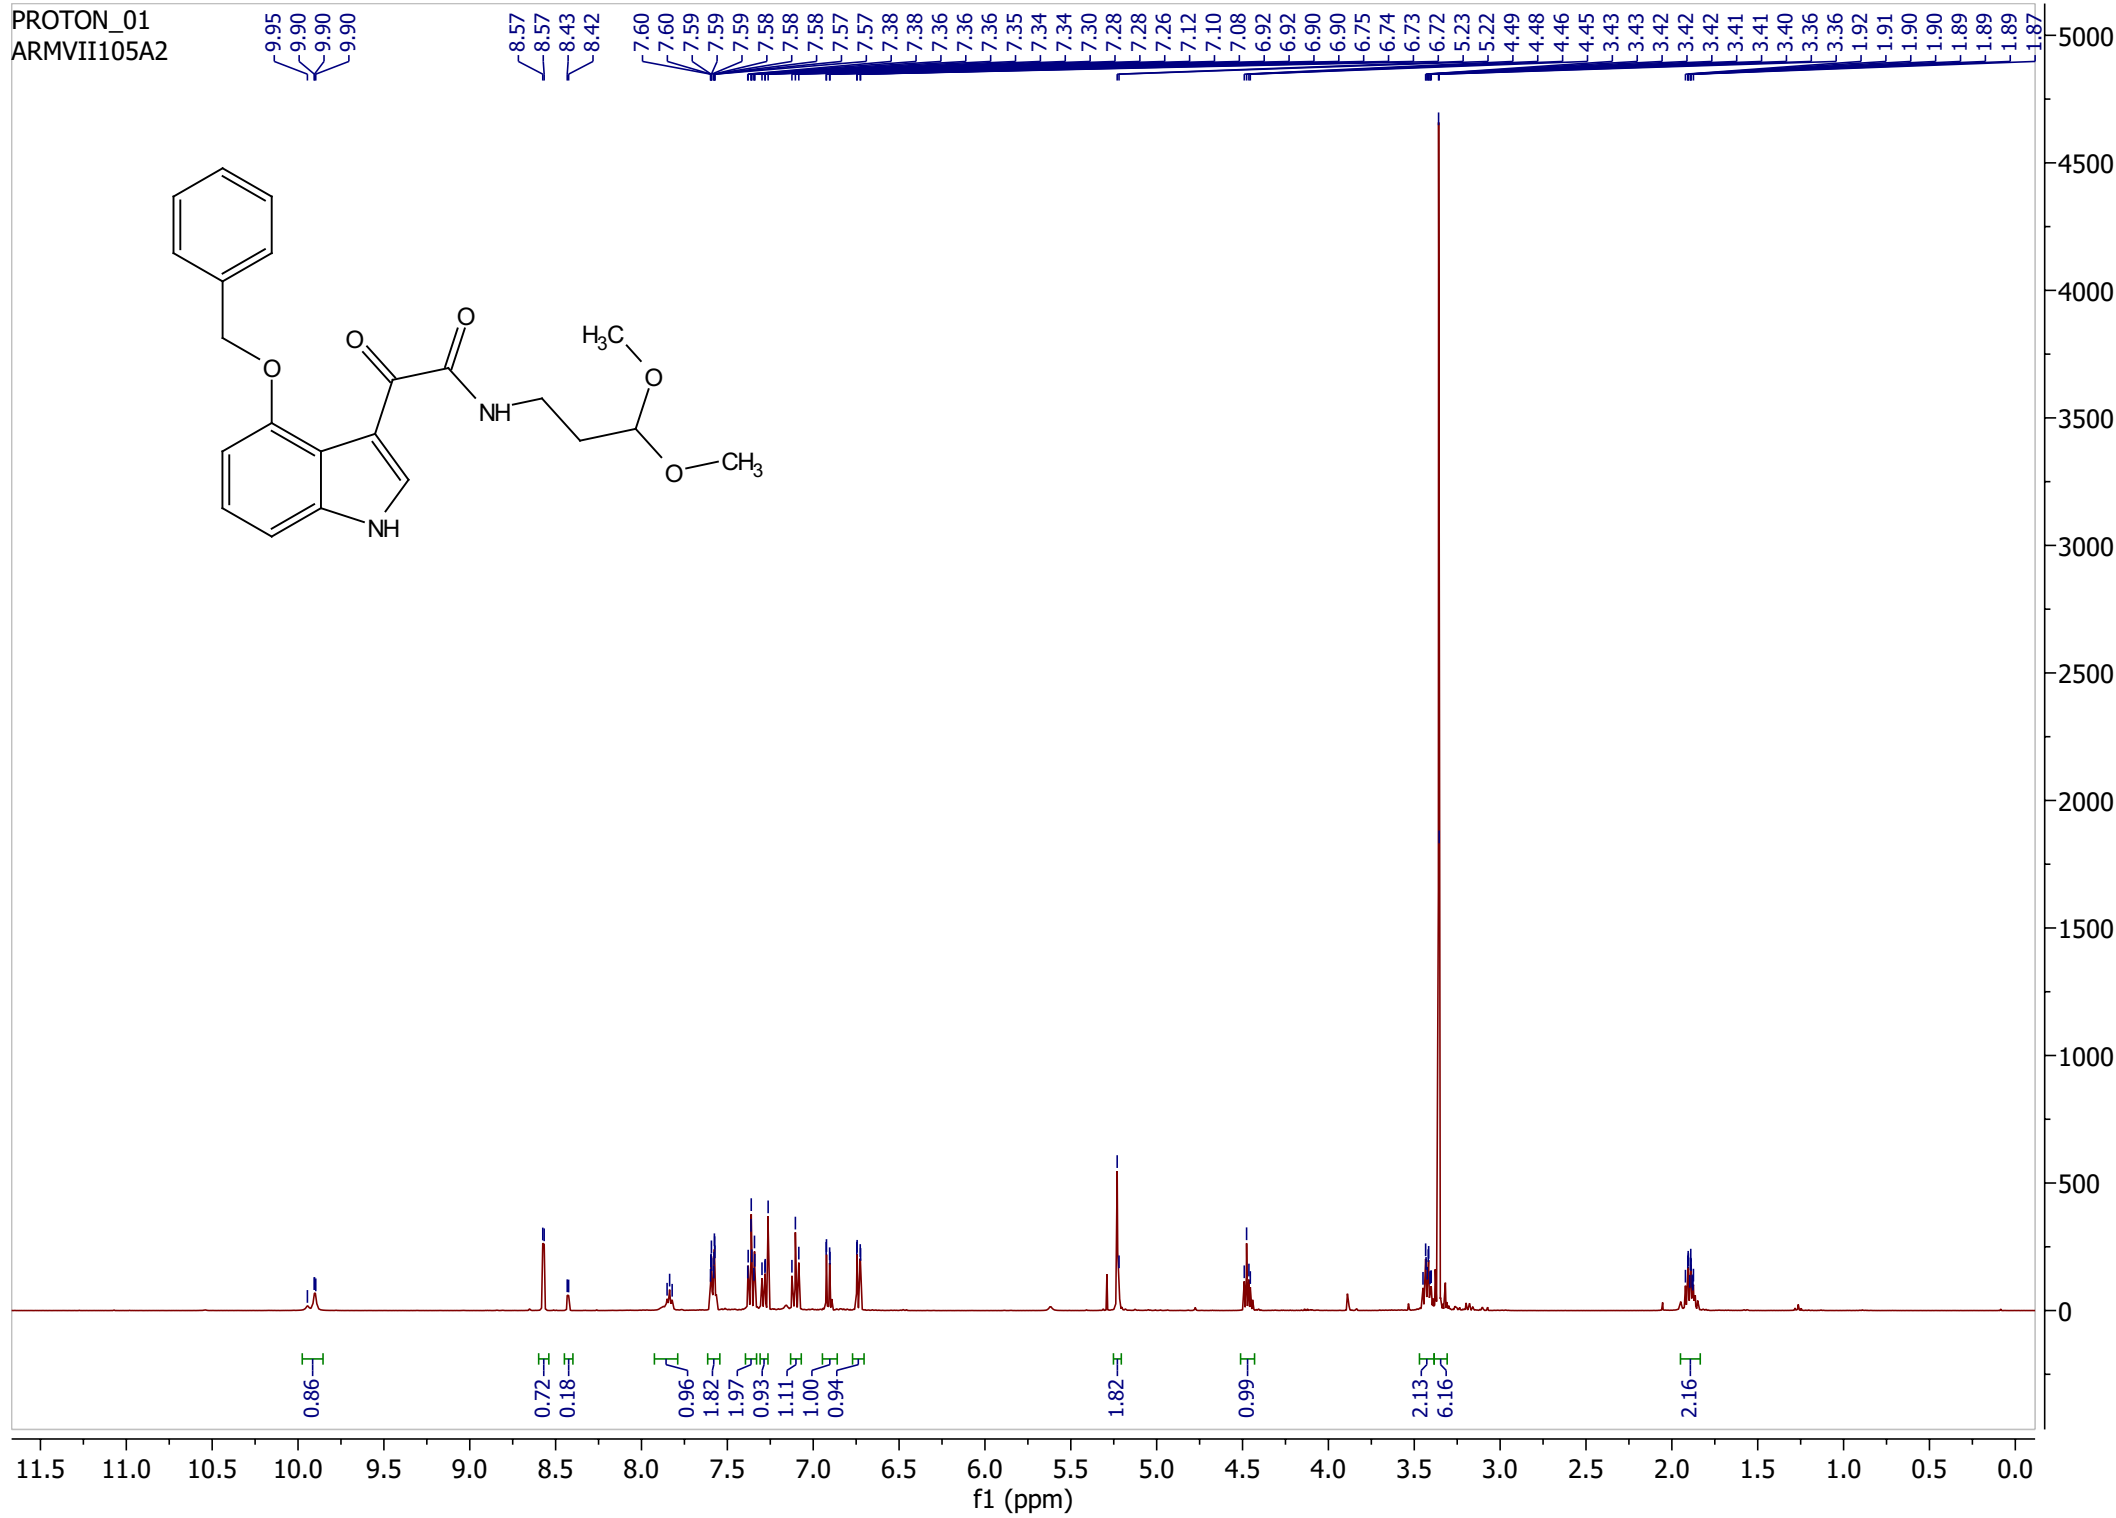



CARBON\_01  
ARMVII105A2

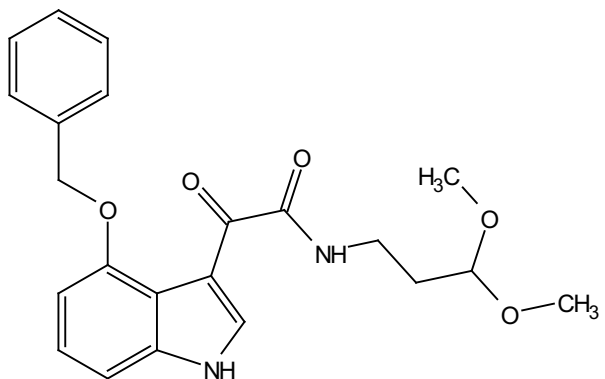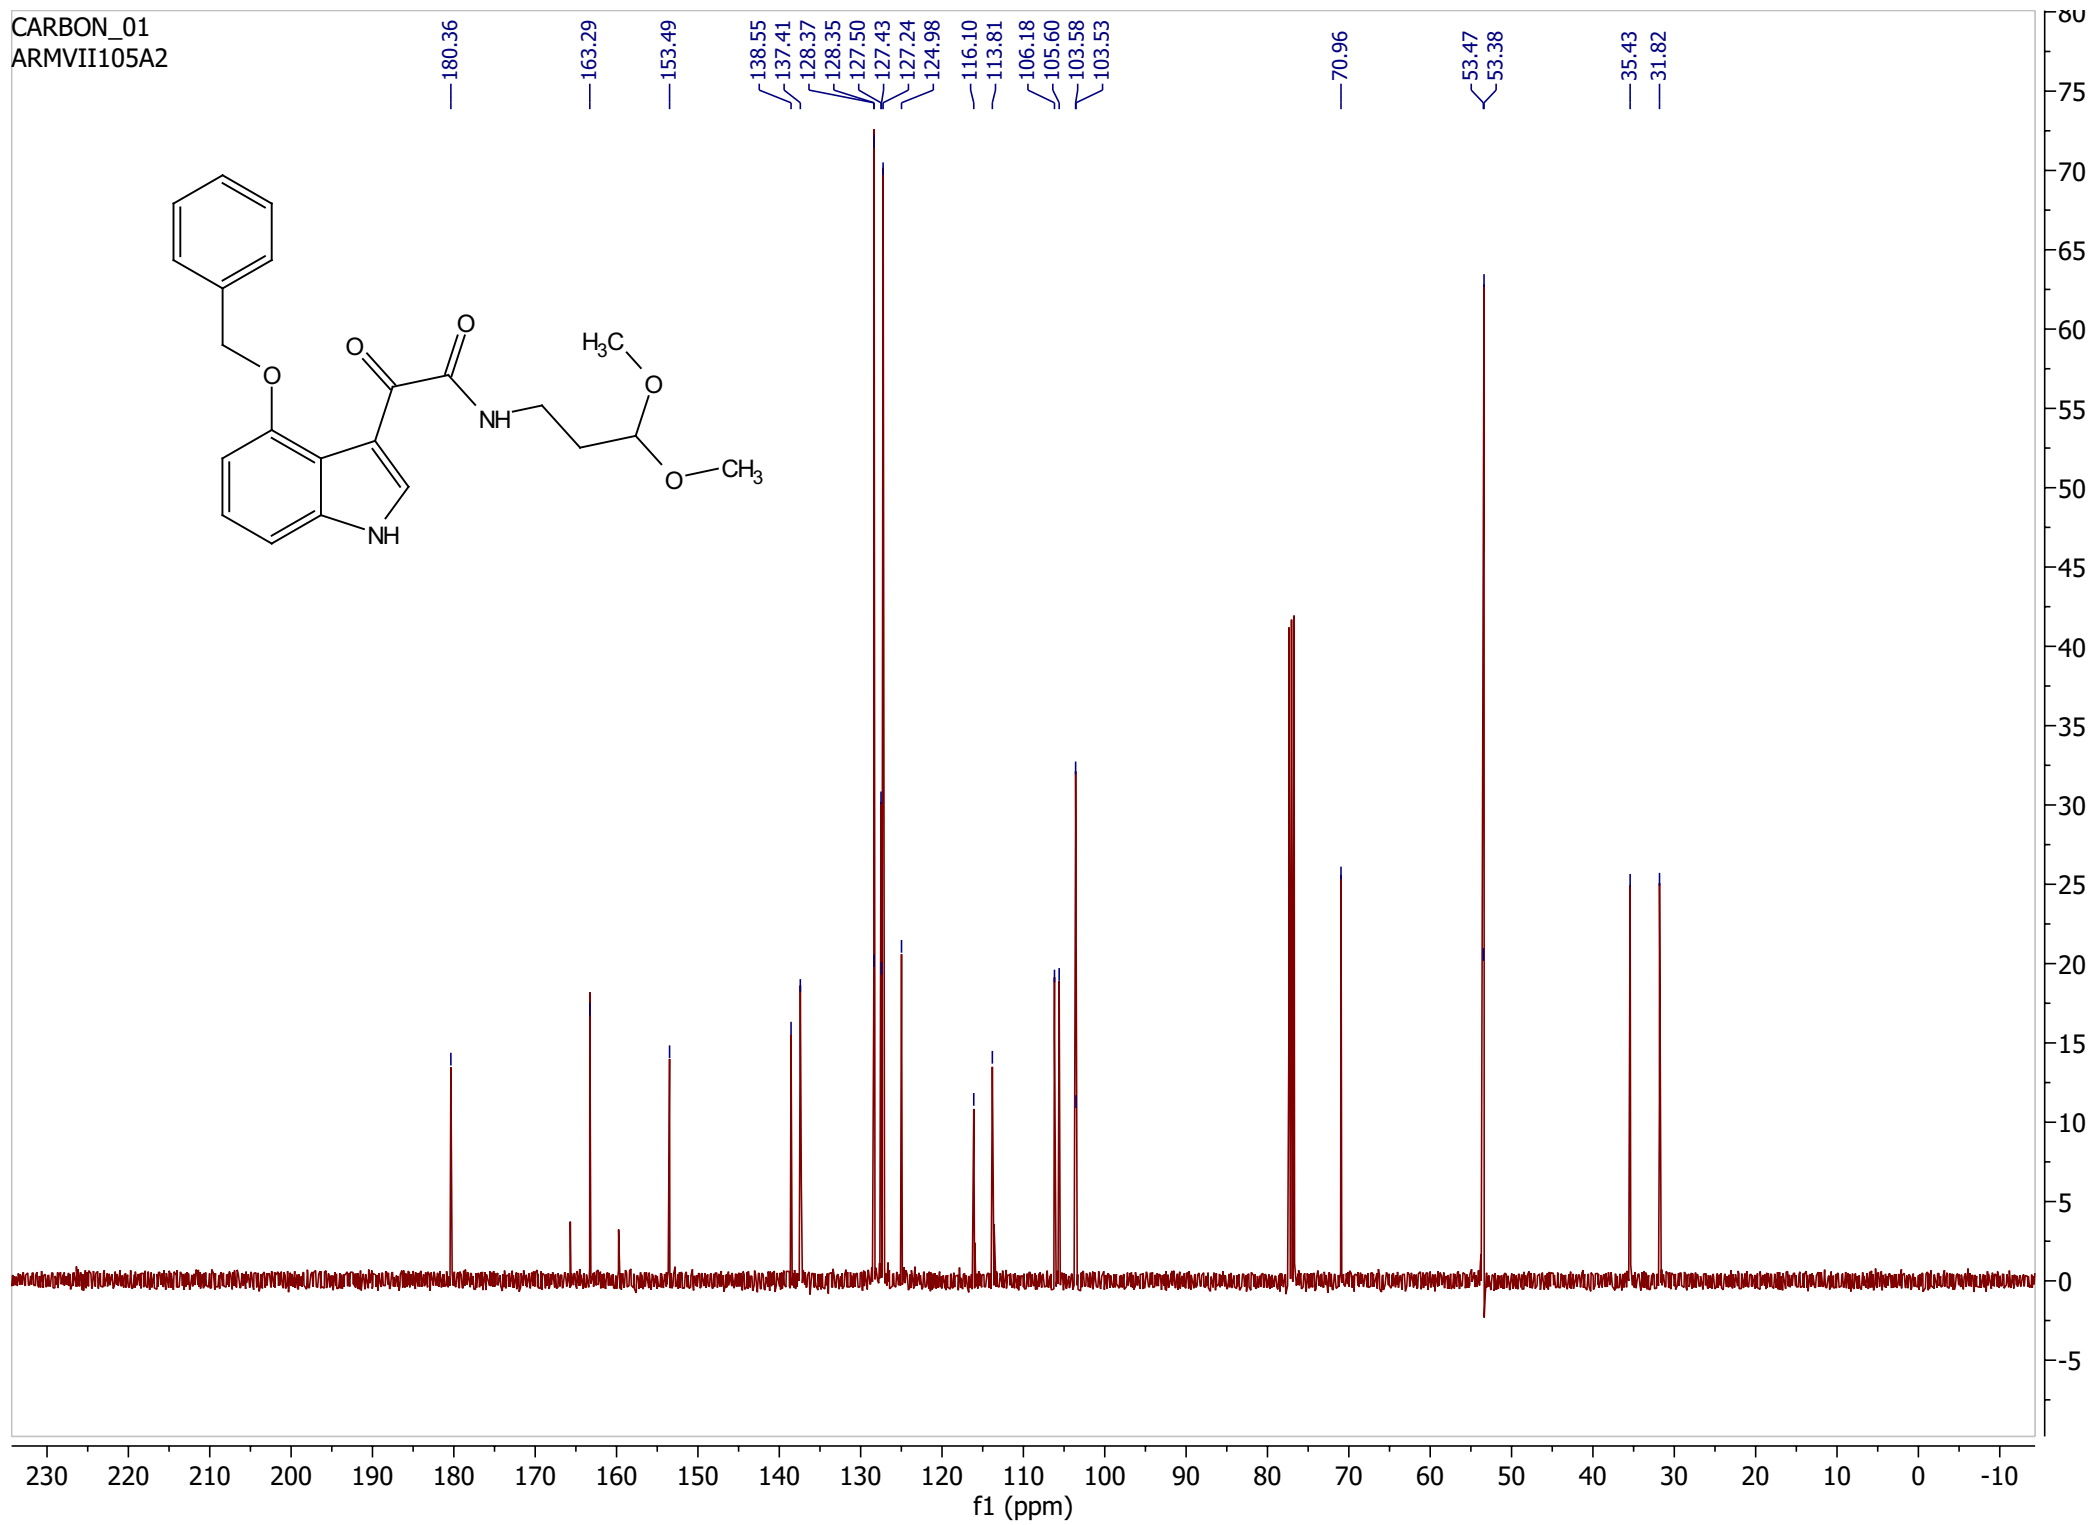

PROTON\_01  
ARMVII122A

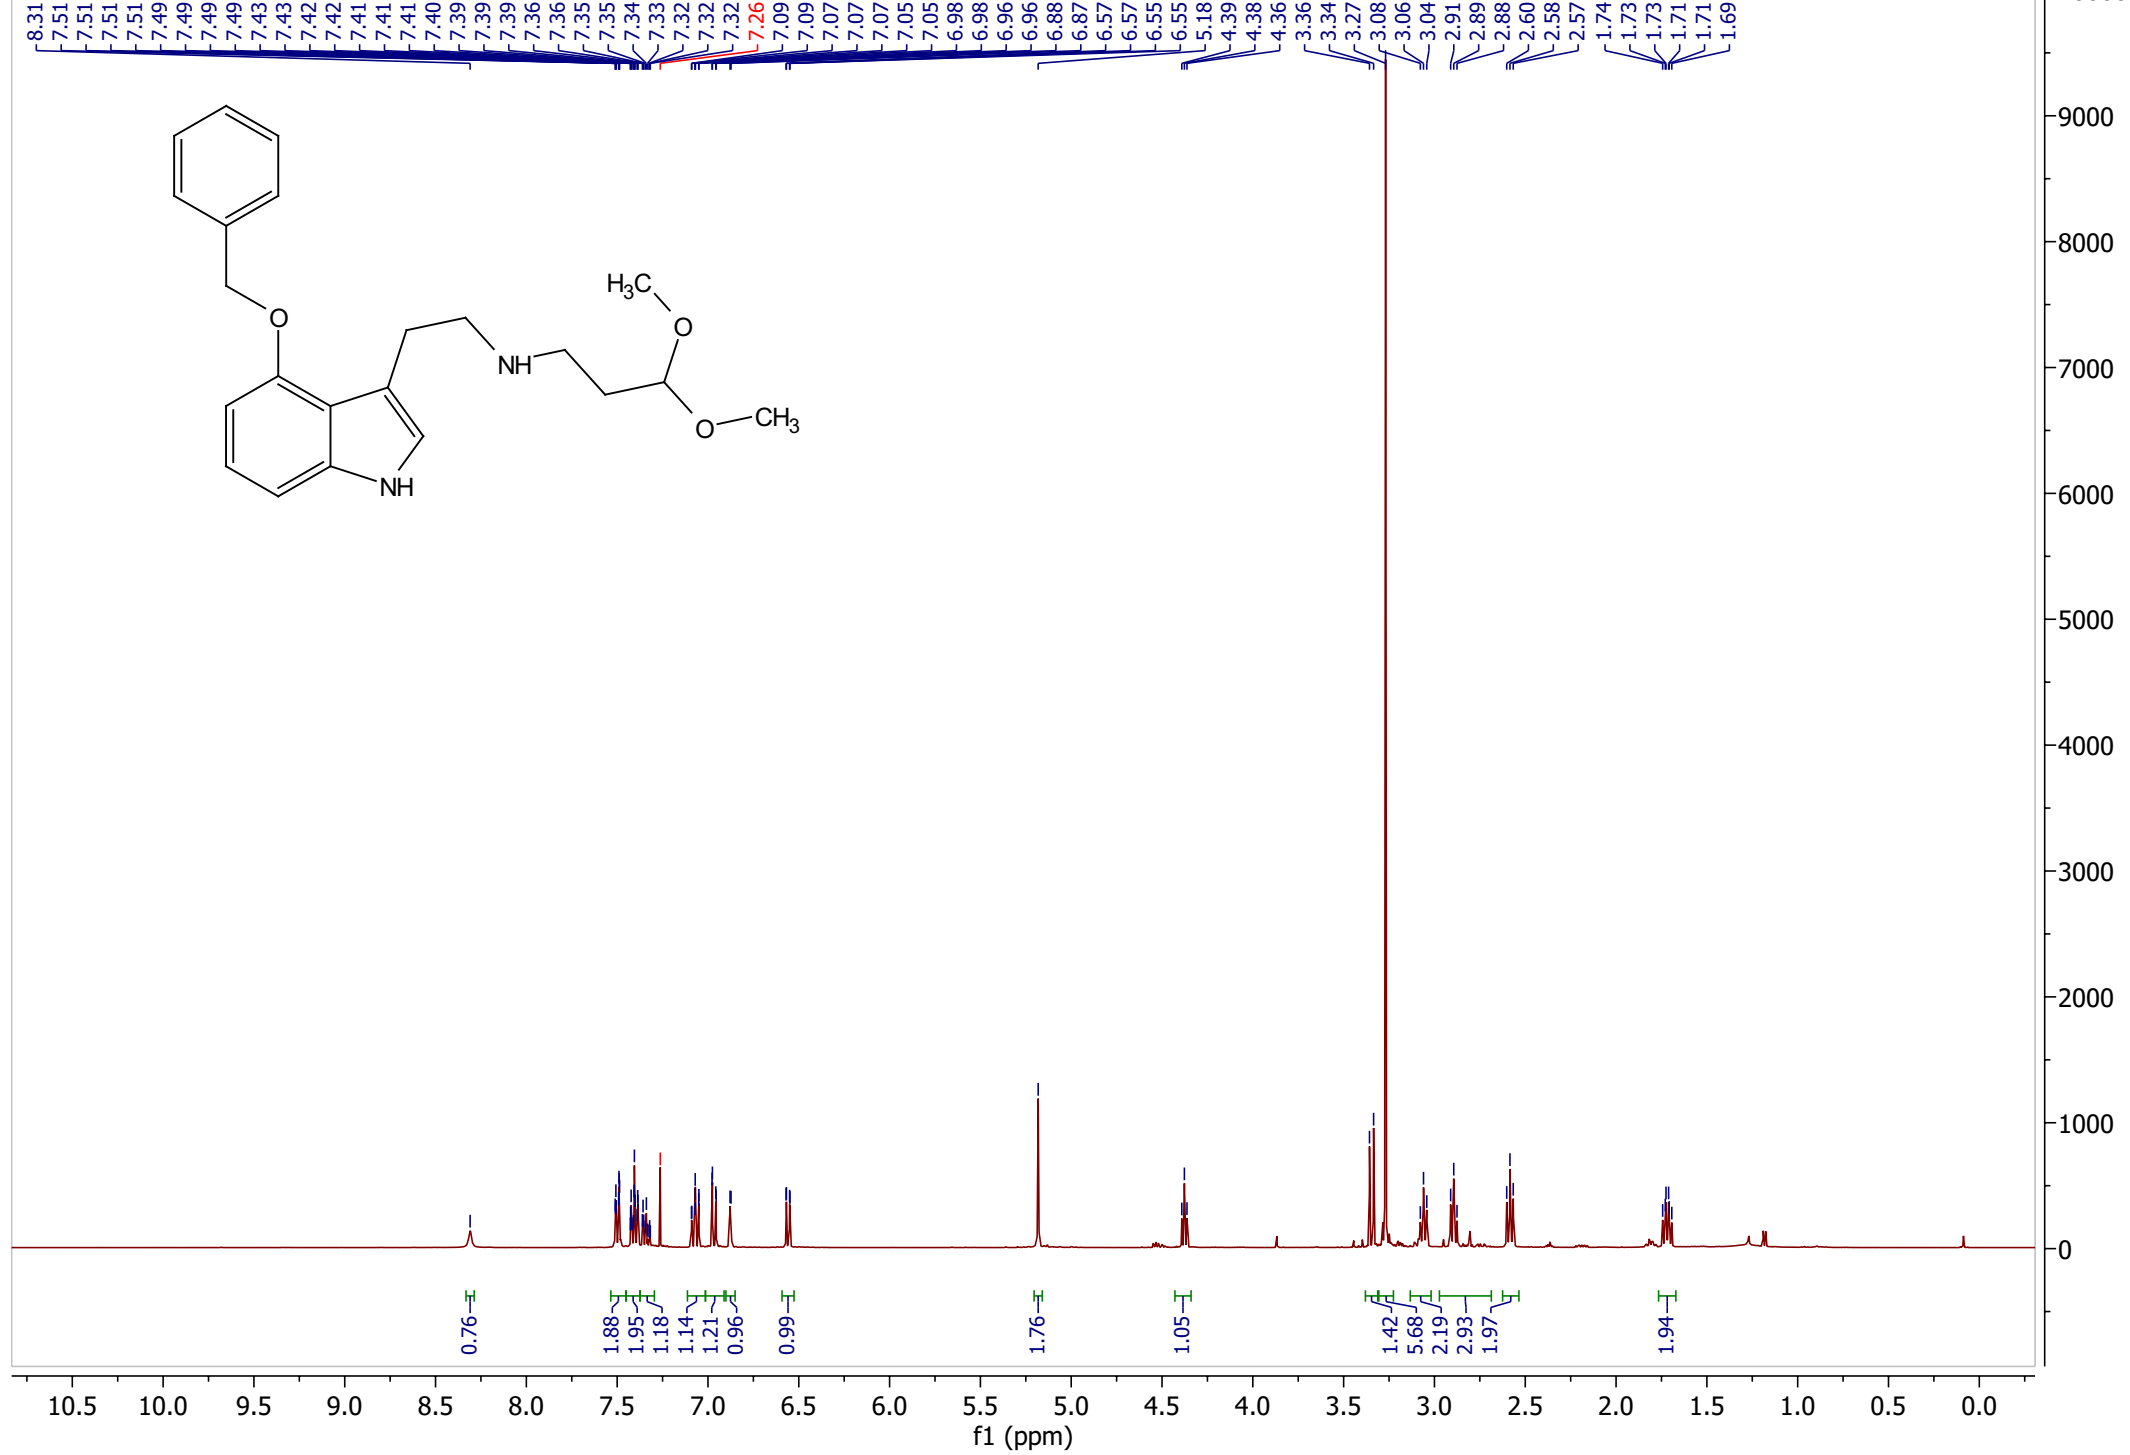

CARBON\_01  
ARMVII122A

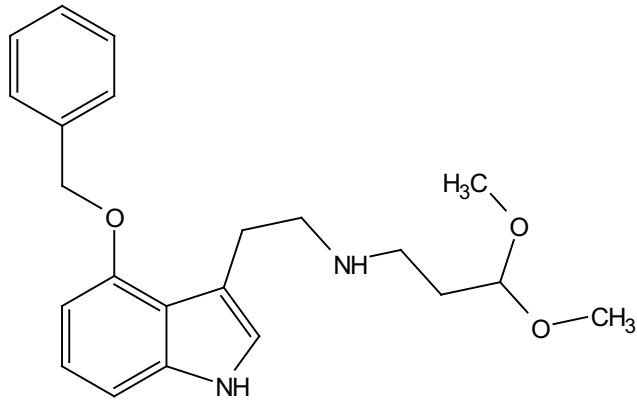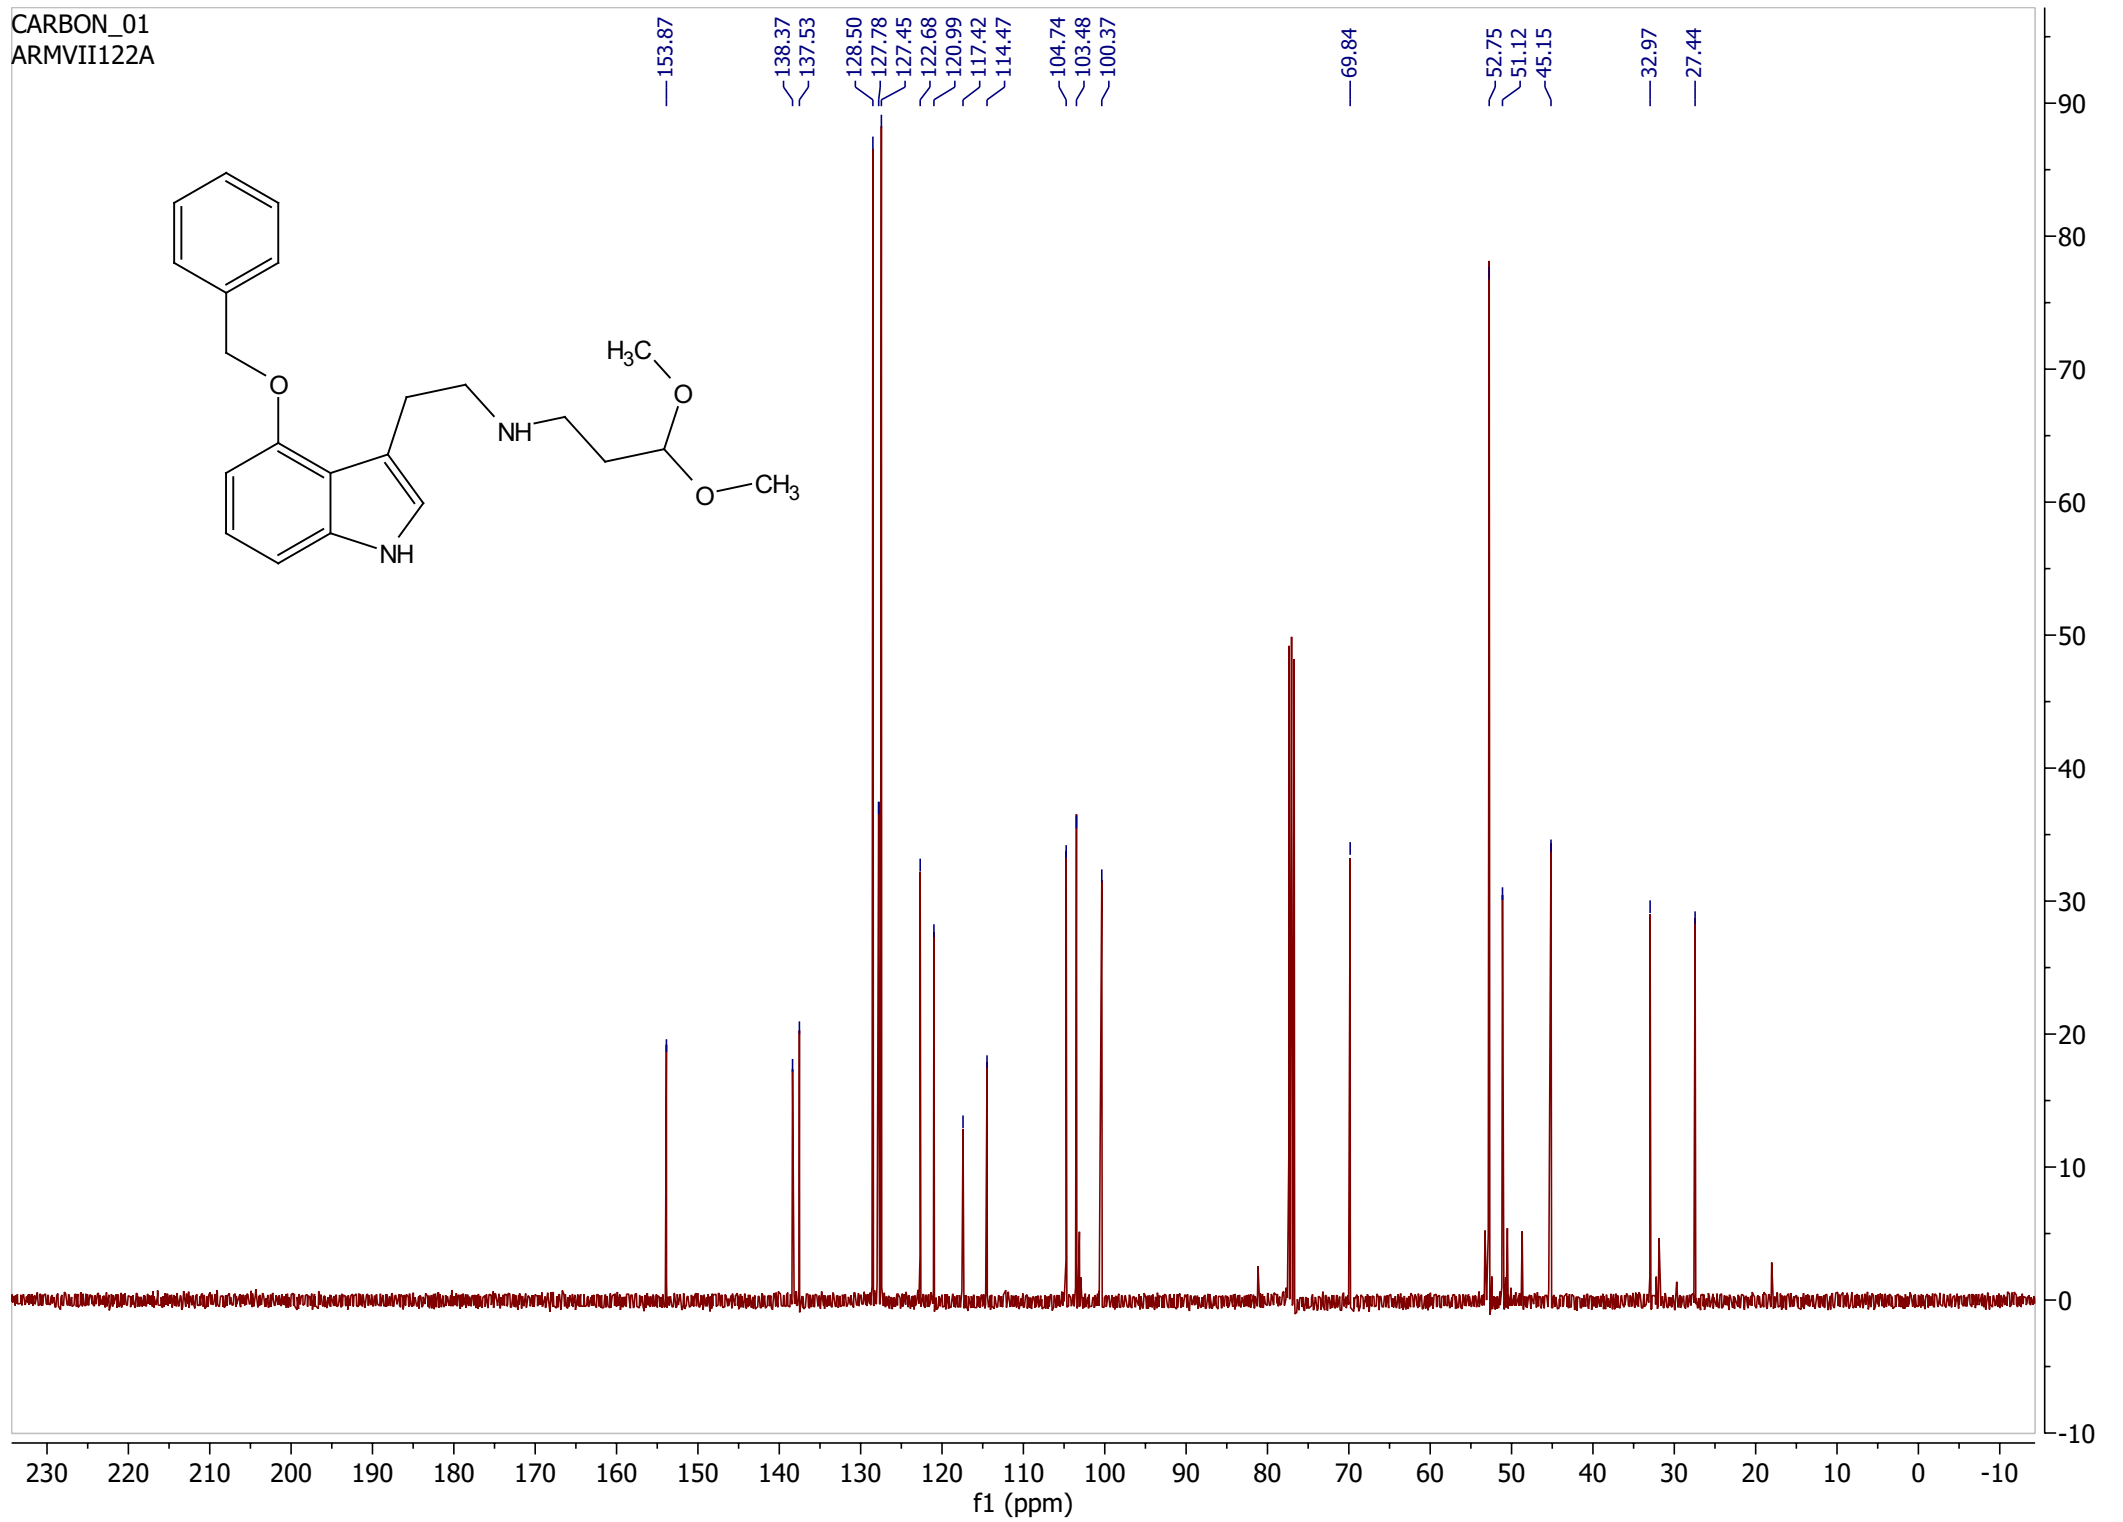

APM132A-01

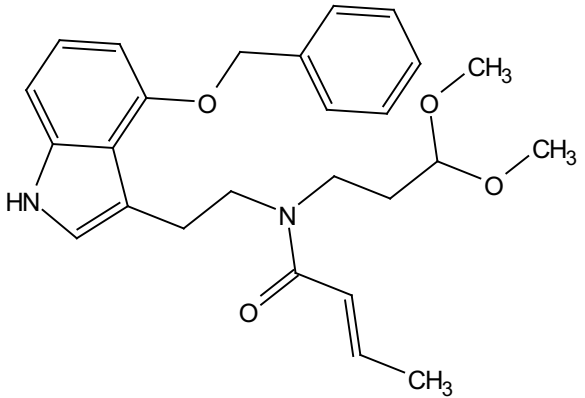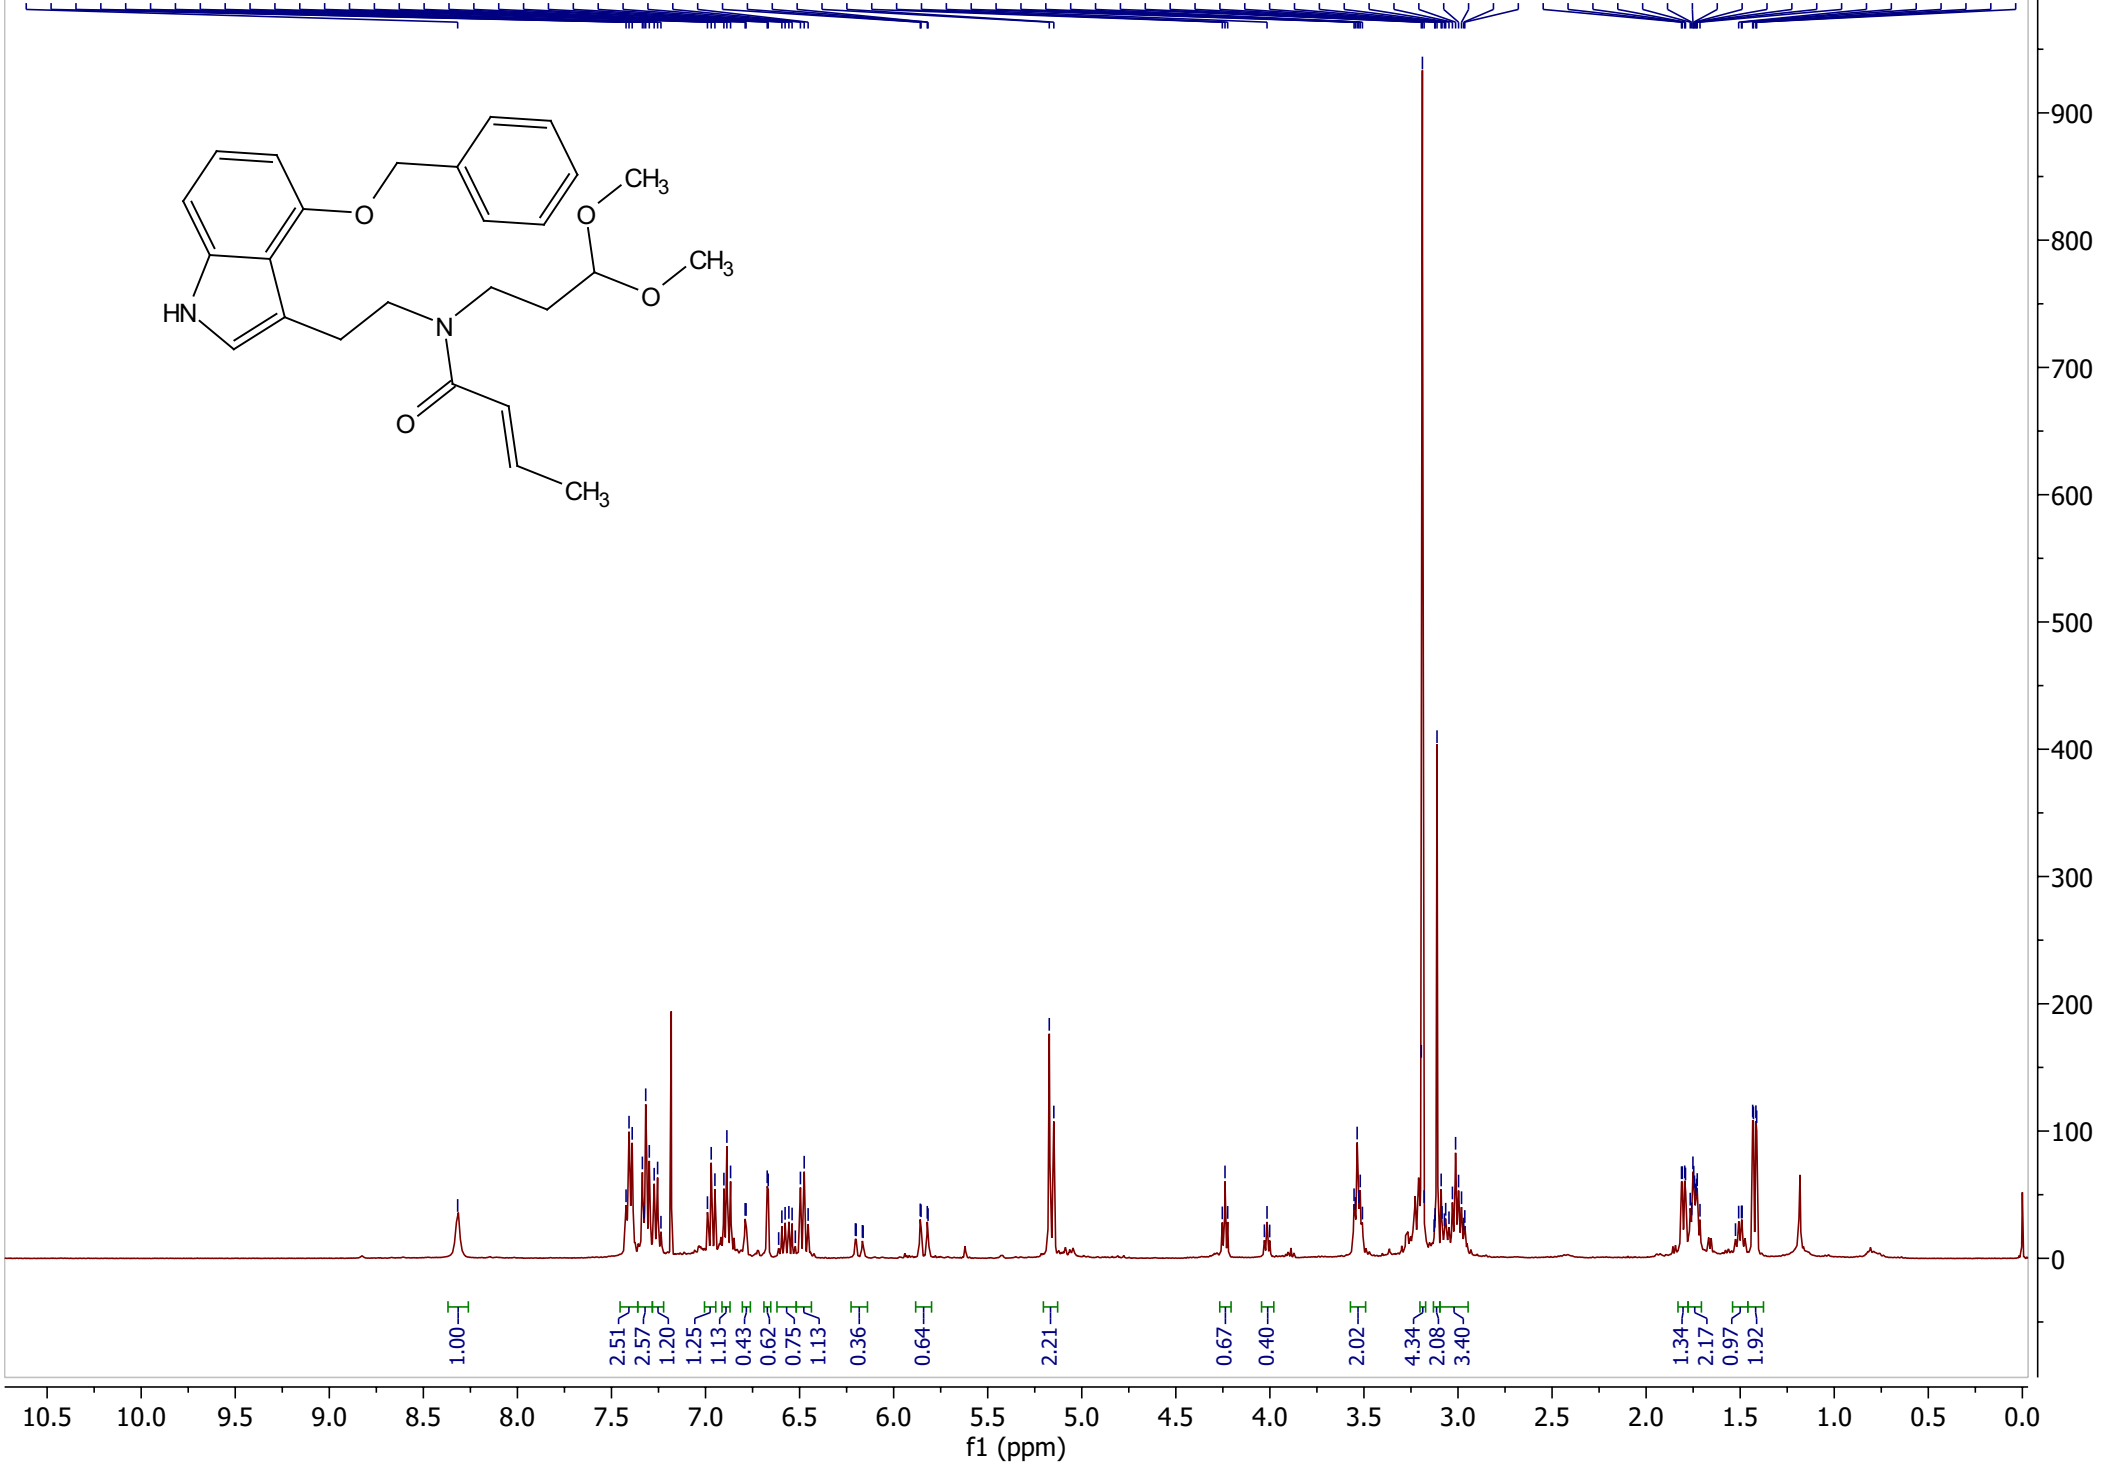

ARMVI32A\_02

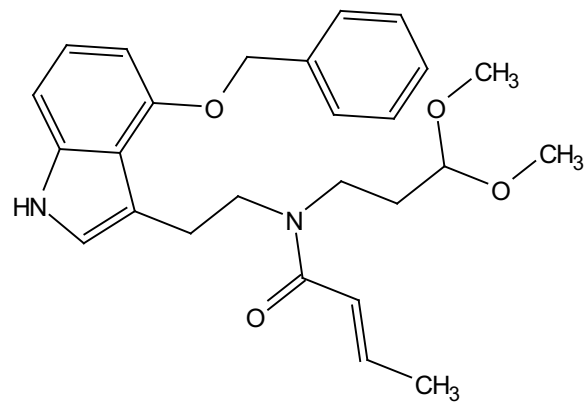

166.86

153.51

141.37

140.20

138.35

137.35

128.61

127.92

127.51

127.30

122.79

121.86

117.41

112.36

104.98

102.80

101.97

100.65

100.45

69.95

52.94

52.80

49.69

48.78

43.76

42.68

32.16

30.79

27.04

18.24

17.78

220 210 200 190 180 170 160 150 140 130 120 110 100 90 80 70 60 50 40 30 20 10 0 -10

f1 (ppm)

110  
100  
90  
80  
70  
60  
50  
40  
30  
20  
10  
0  
-10

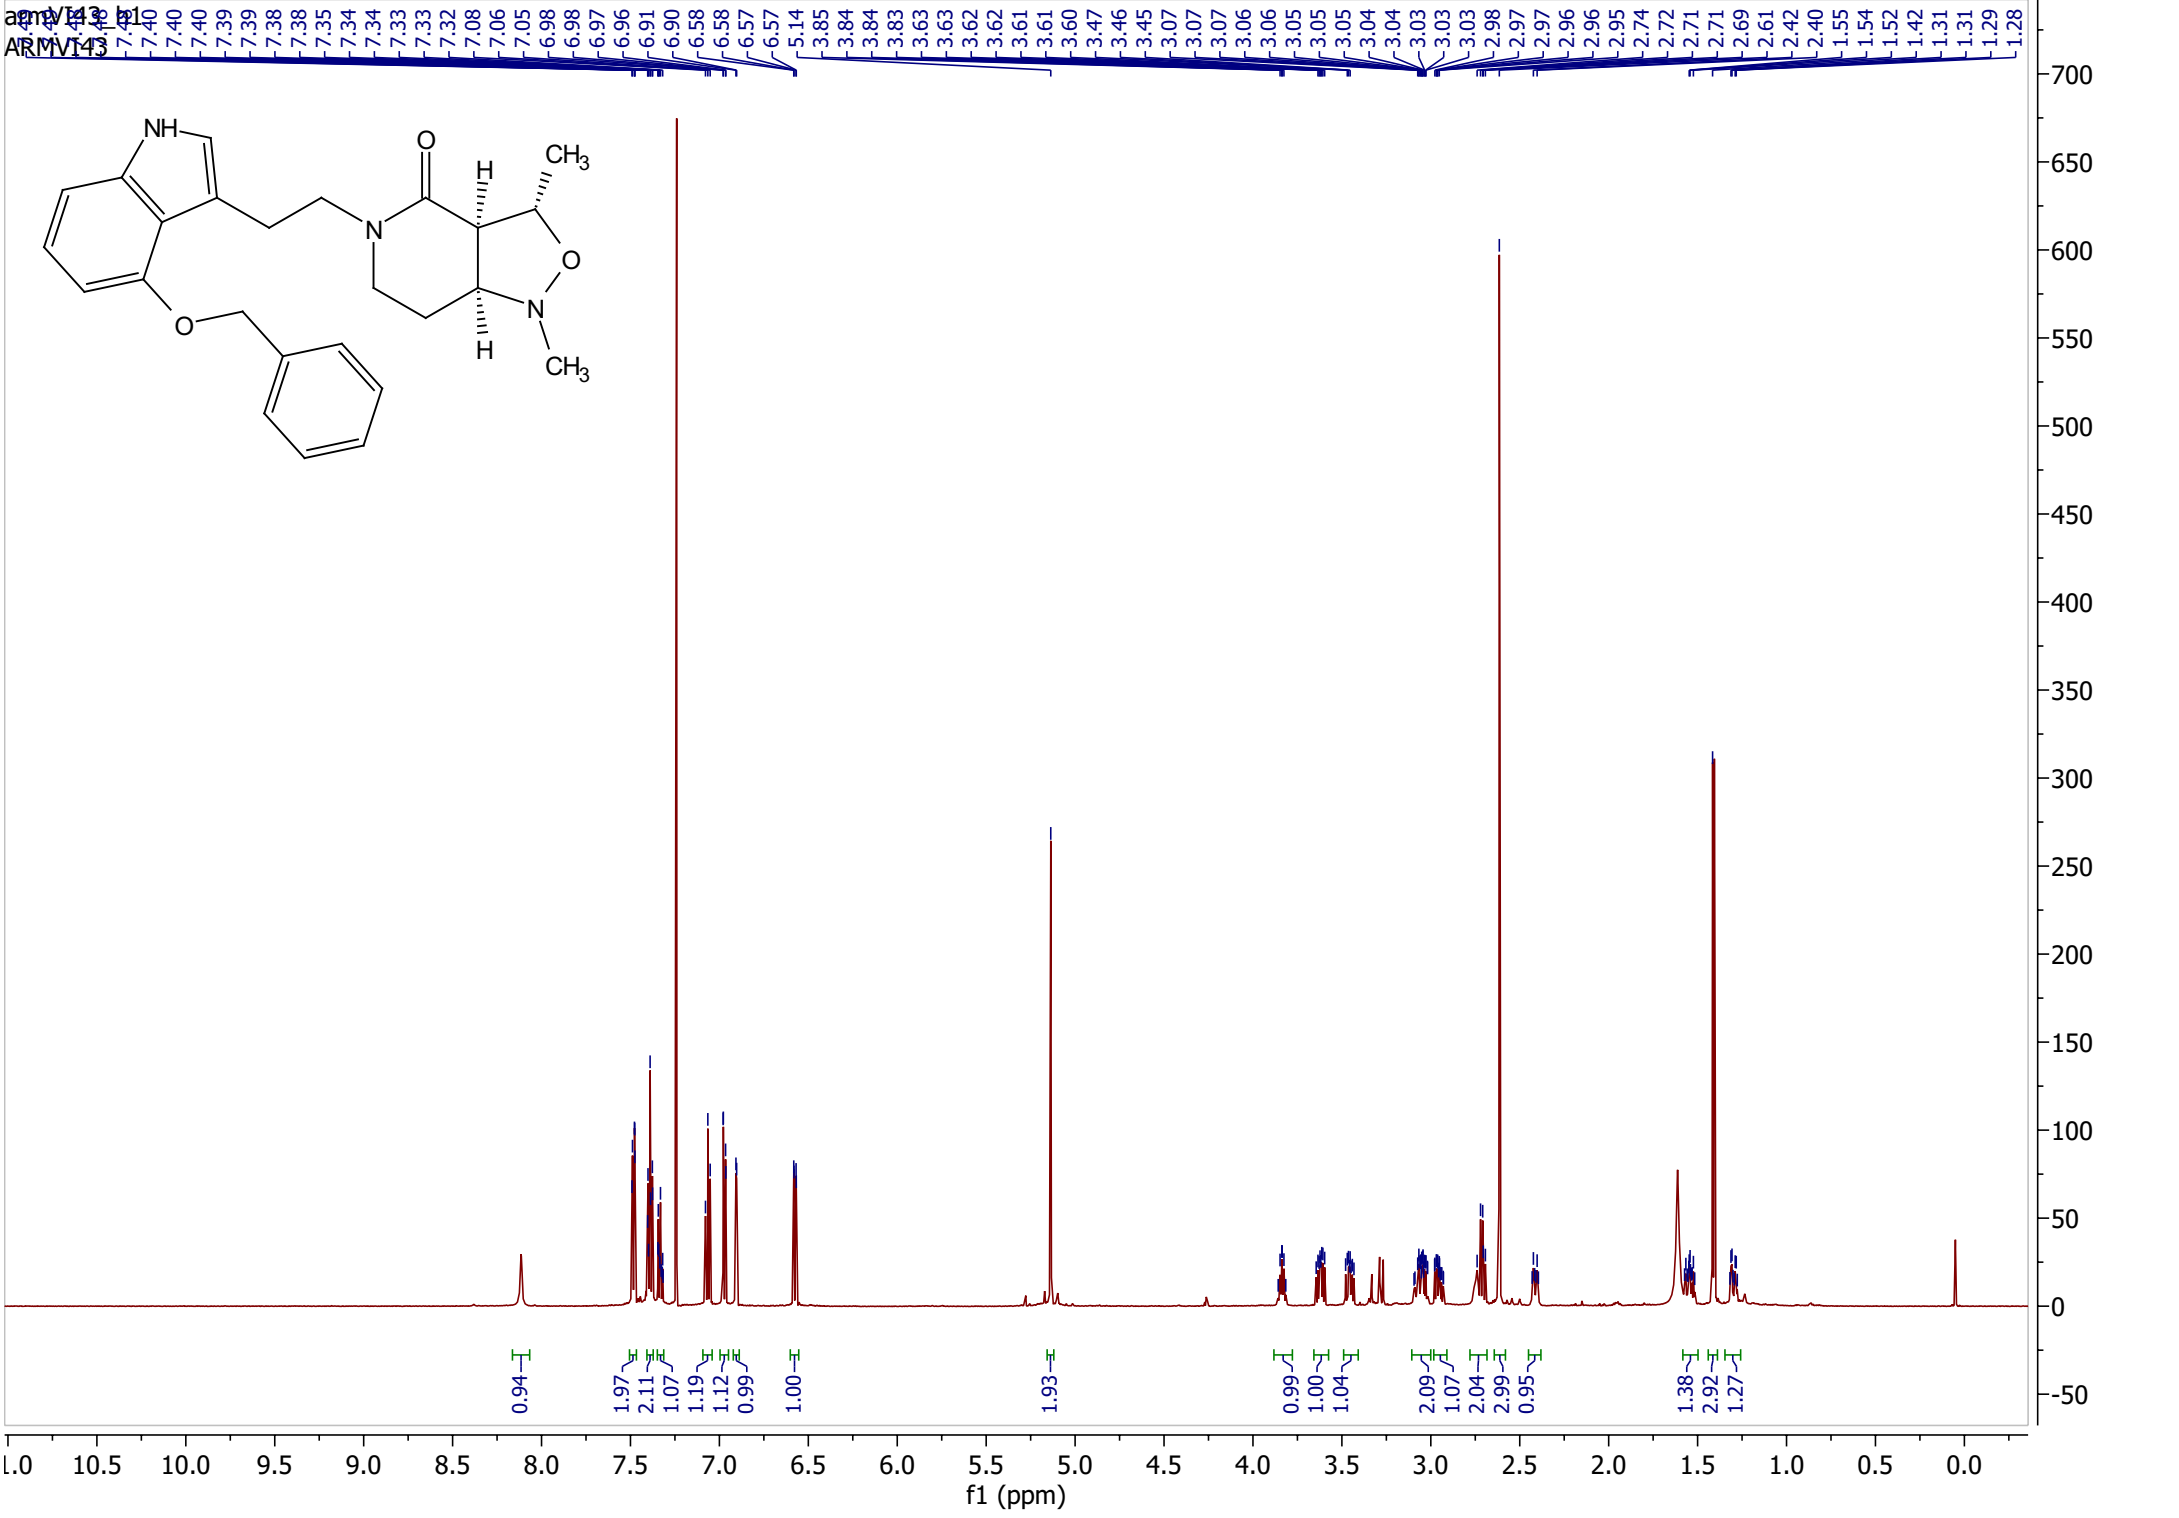

armVI43\_c13  
ARMVI43

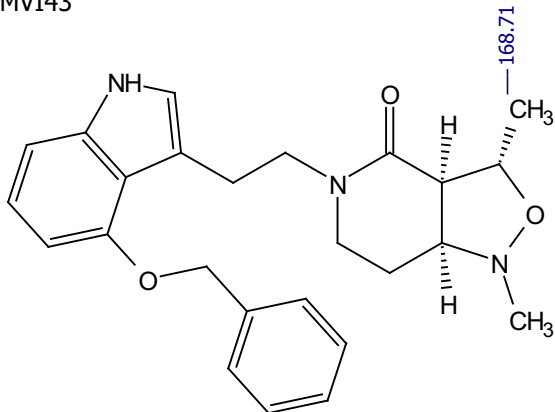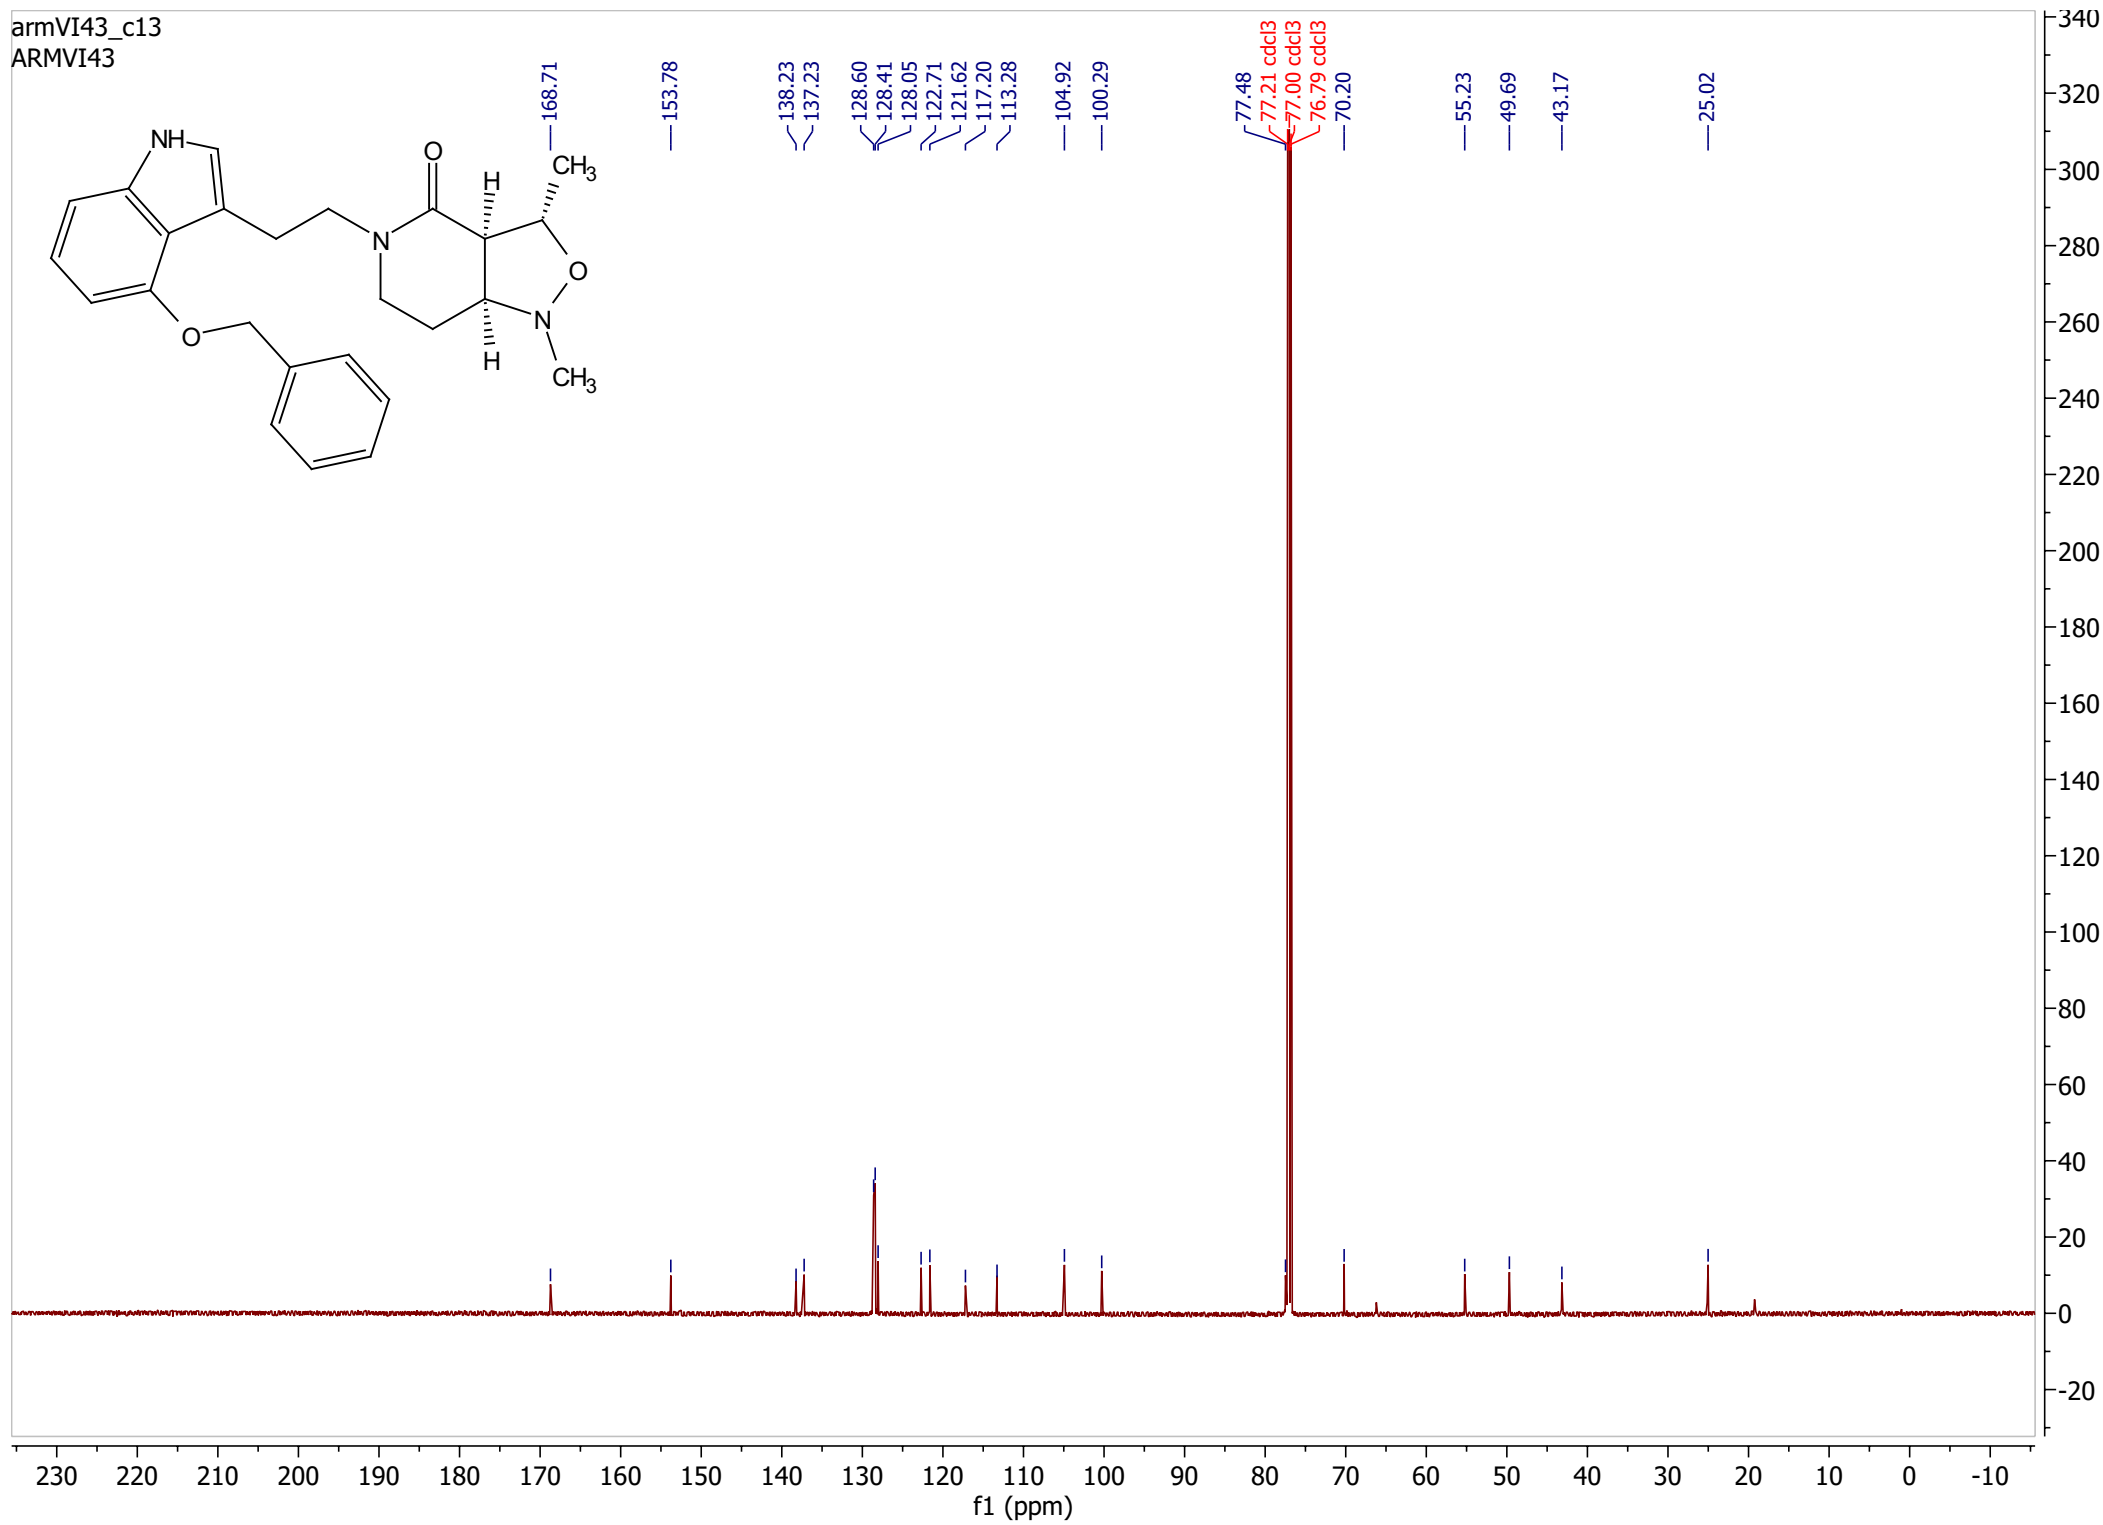

PROTON 01  
armyIII-163

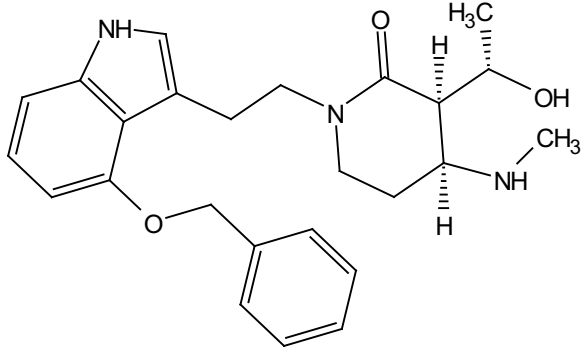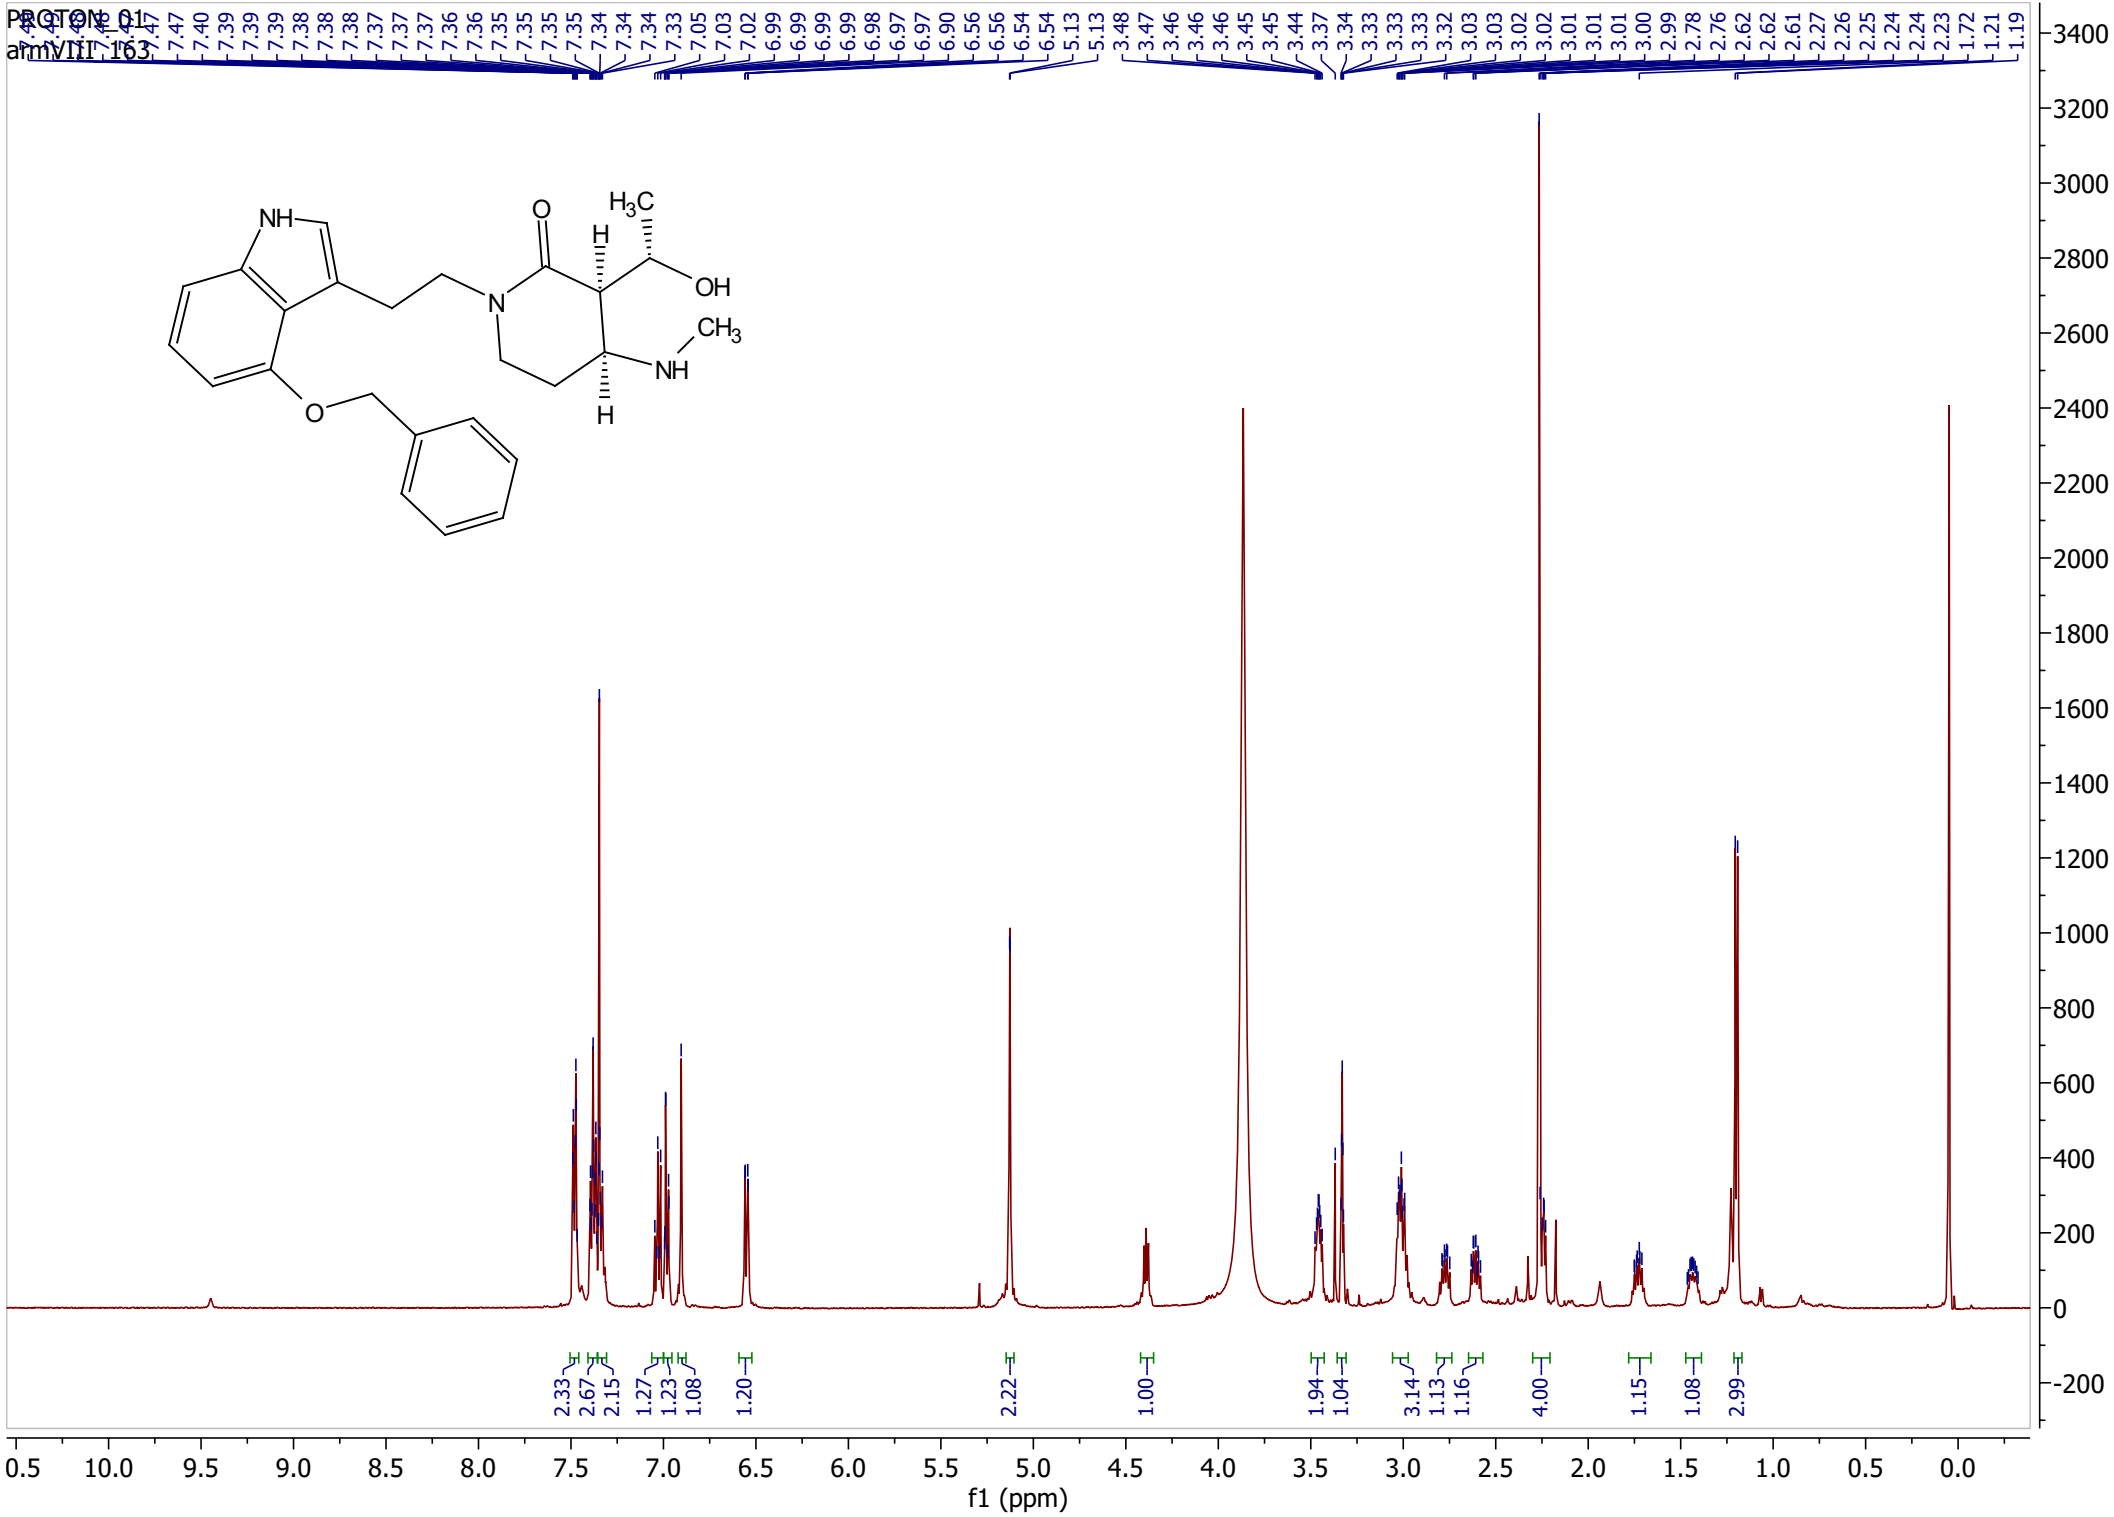



CARBON\_01  
armVIII\_163

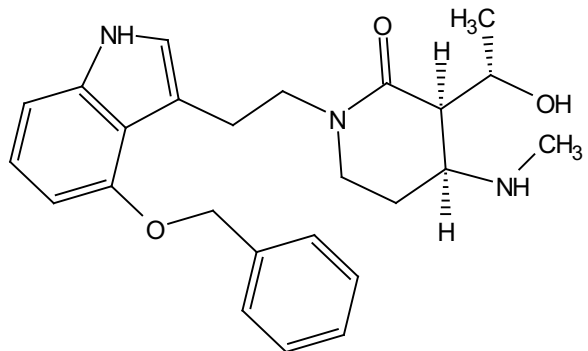

— 169.48

— 153.62

138.35

137.32

128.48

128.35

128.01

122.25

122.03

117.07

112.18

— 105.12

— 99.89

77.44

77.18

76.93

70.14

66.44

— 54.37

— 49.97

— 43.64

— 33.36

24.41

24.34

20.92

— 0.87

230 220 210 200 190 180 170 160 150 140 130 120 110 100 90 80 70 60 50 40 30 20 10 0 -10 -20 -30

f1 (ppm)

200  
190  
180  
170  
160  
150  
140  
130  
120  
110  
100  
90  
80  
70  
60  
50  
40  
30  
20  
10  
0  
-10  
-20  
-30

army112a2  
ARMY112A2

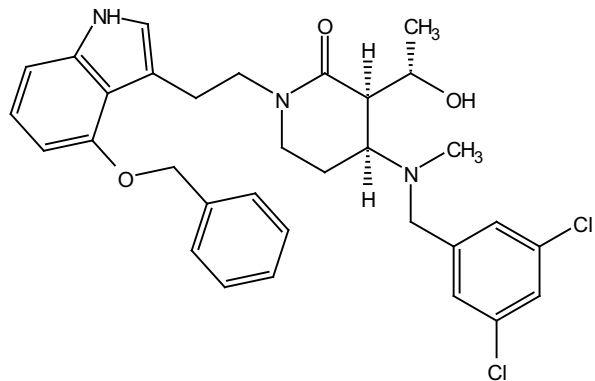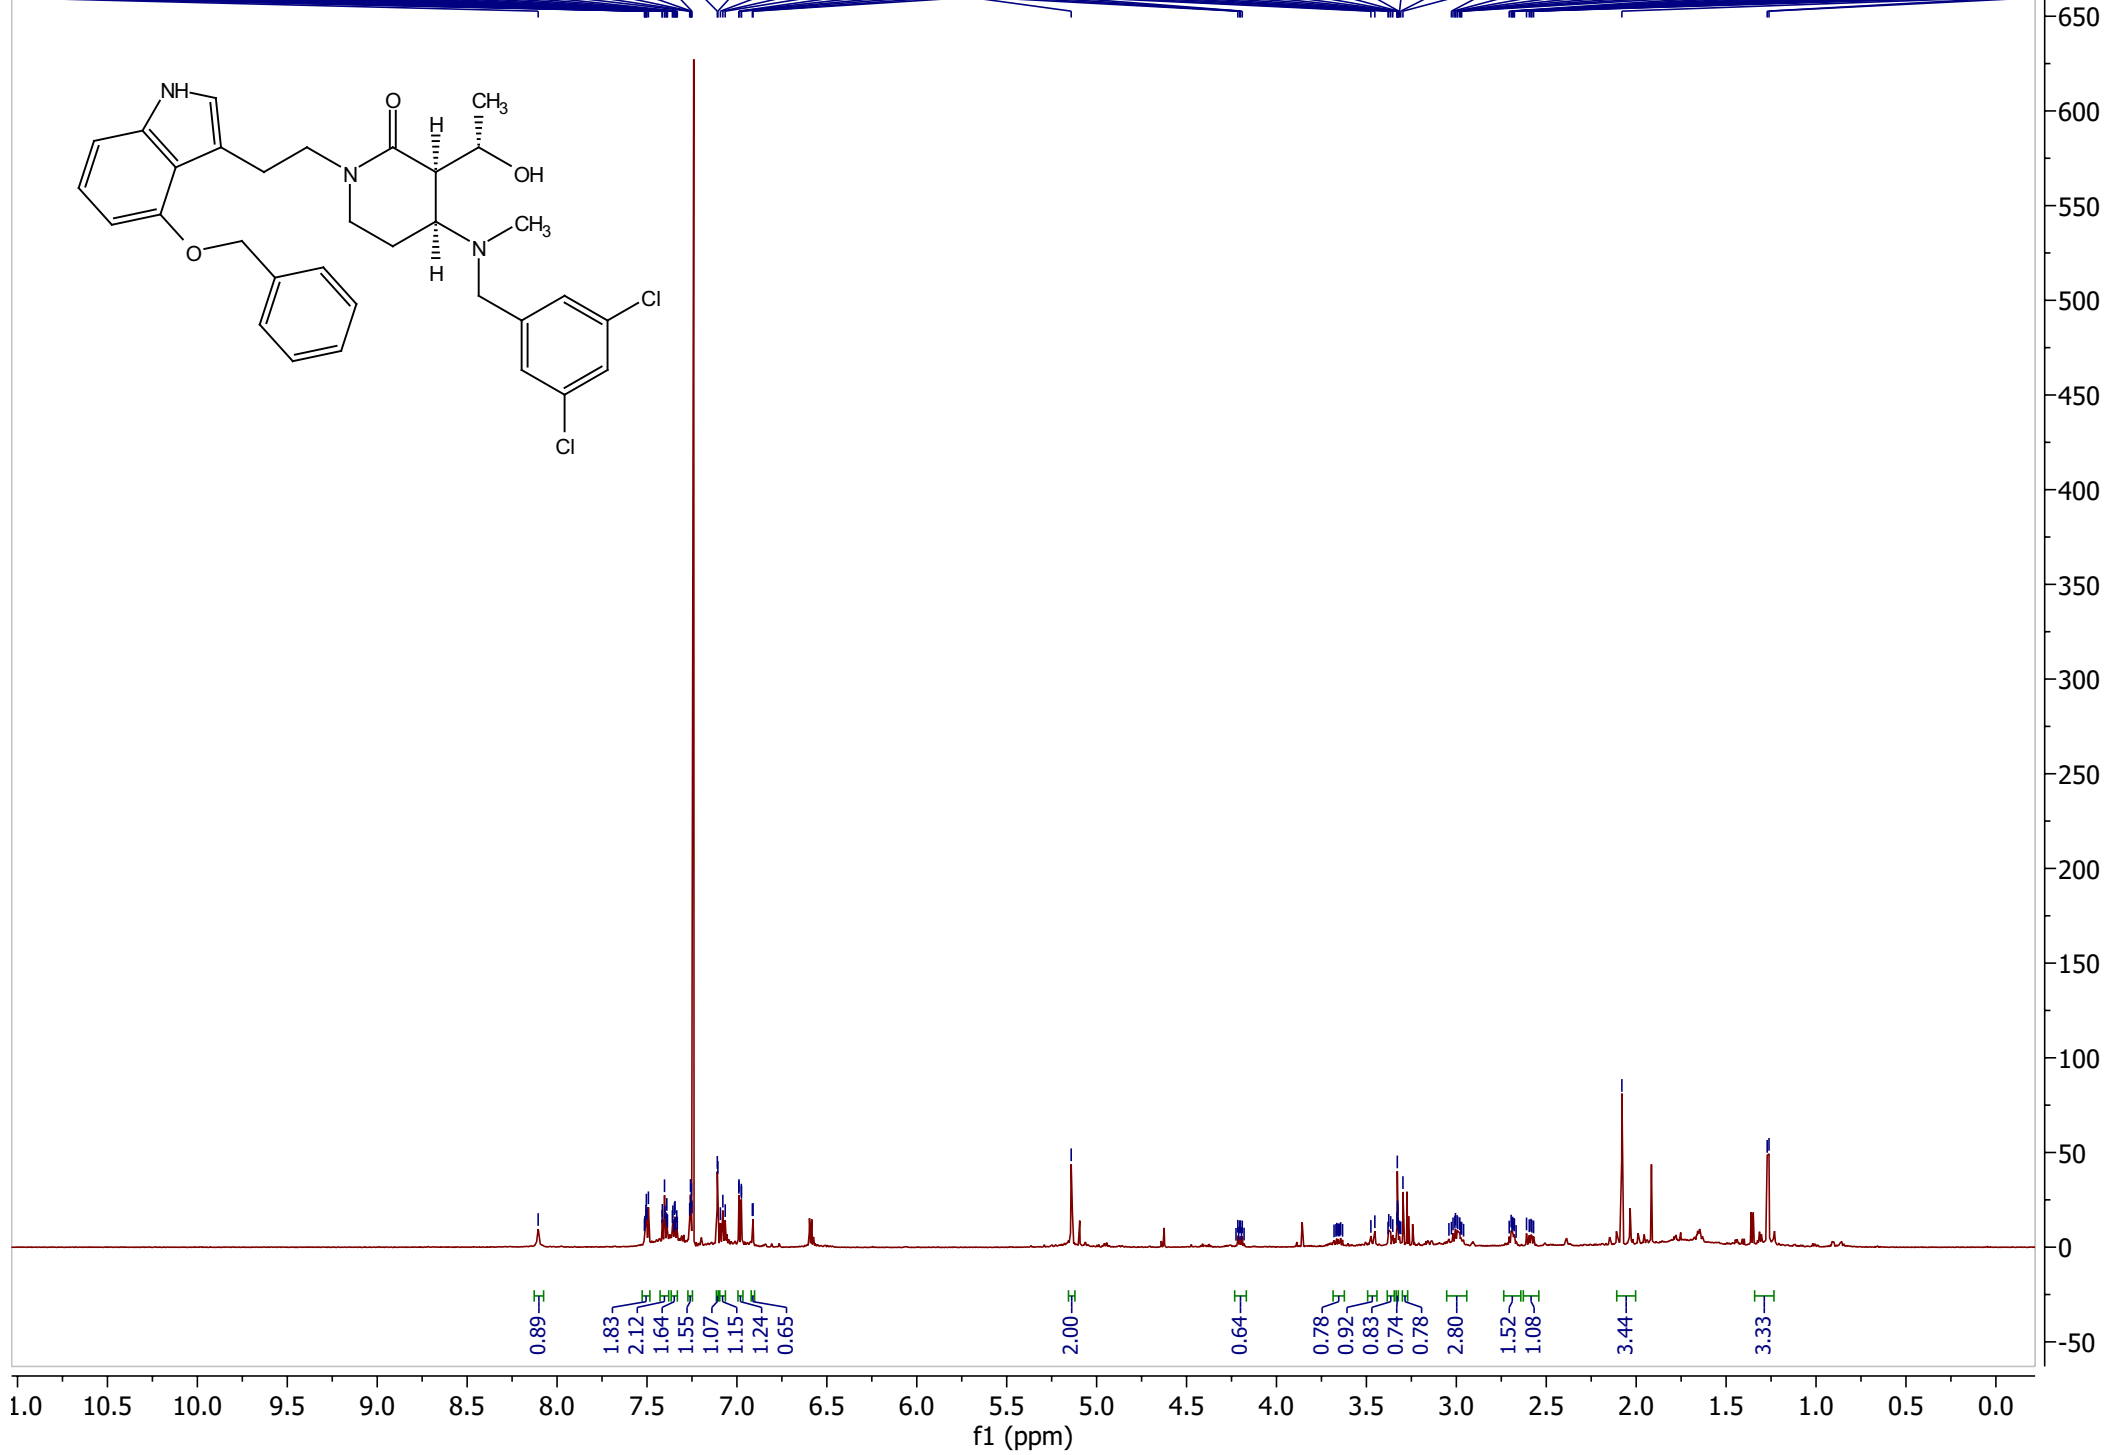

armVI112a2\_c13  
ARMVI112A2

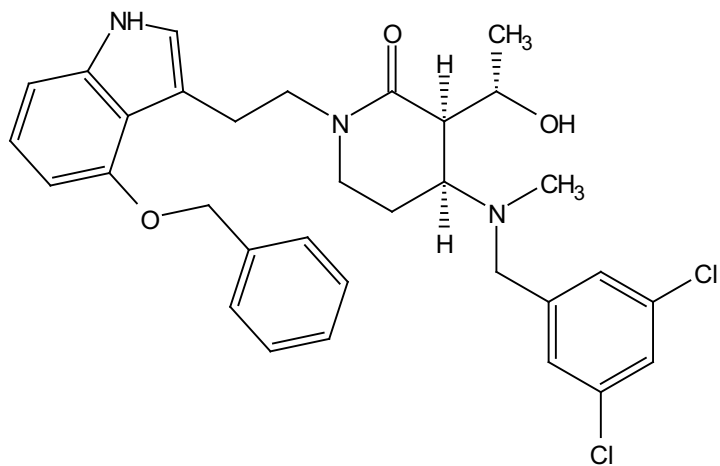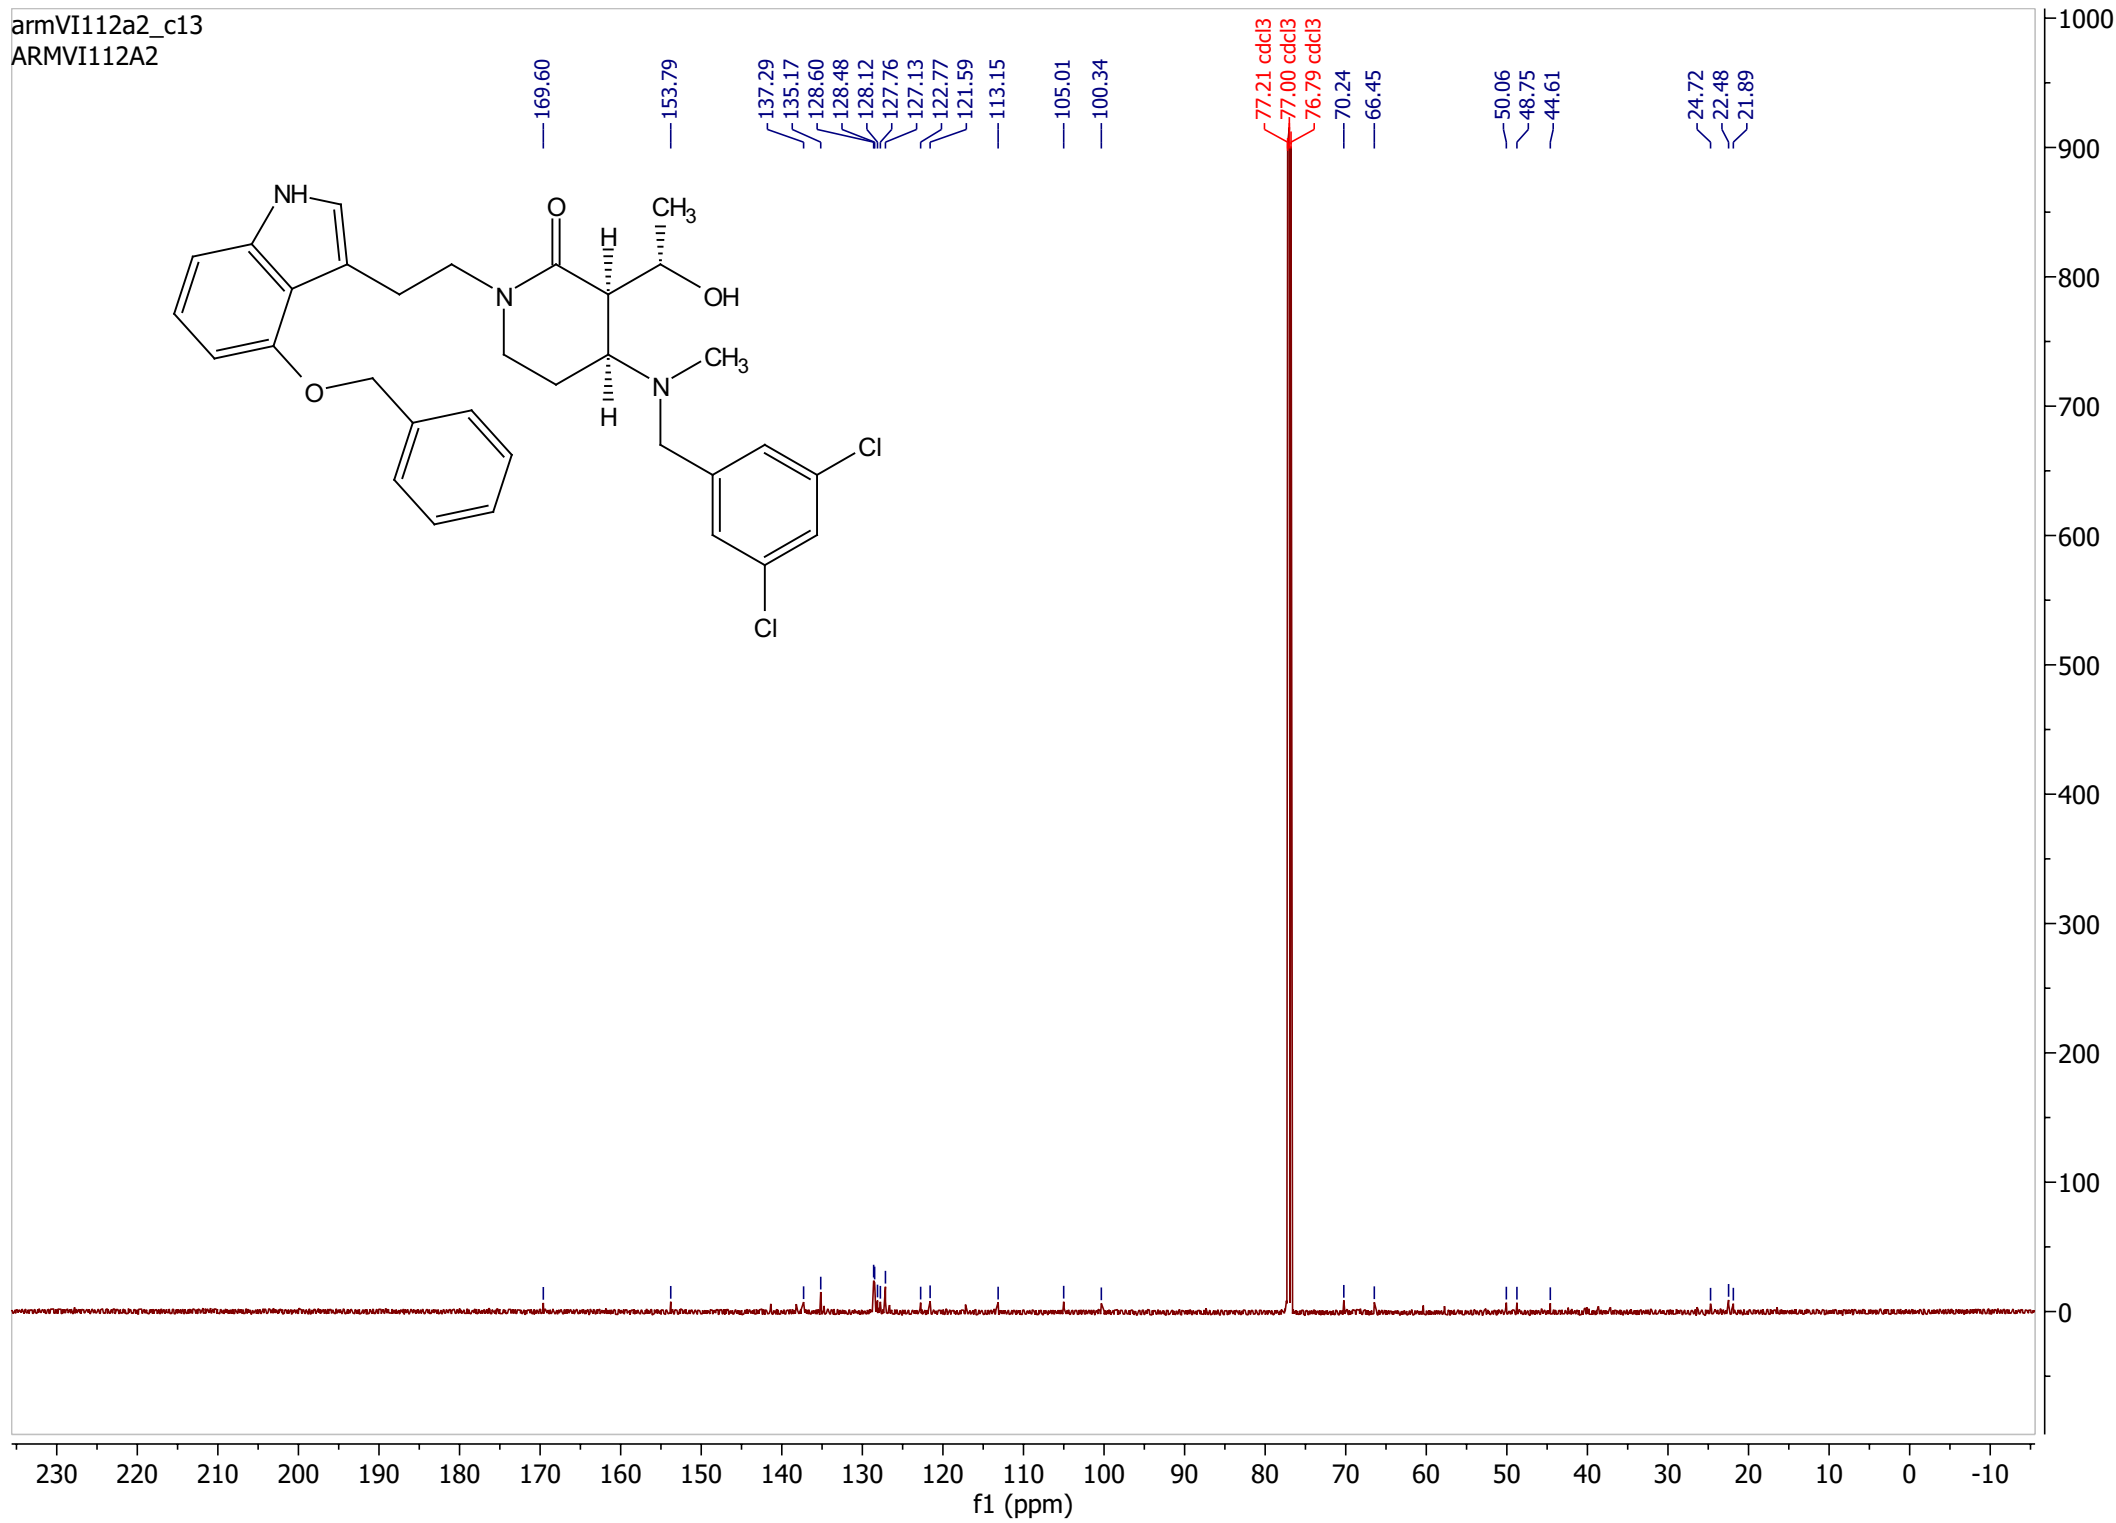

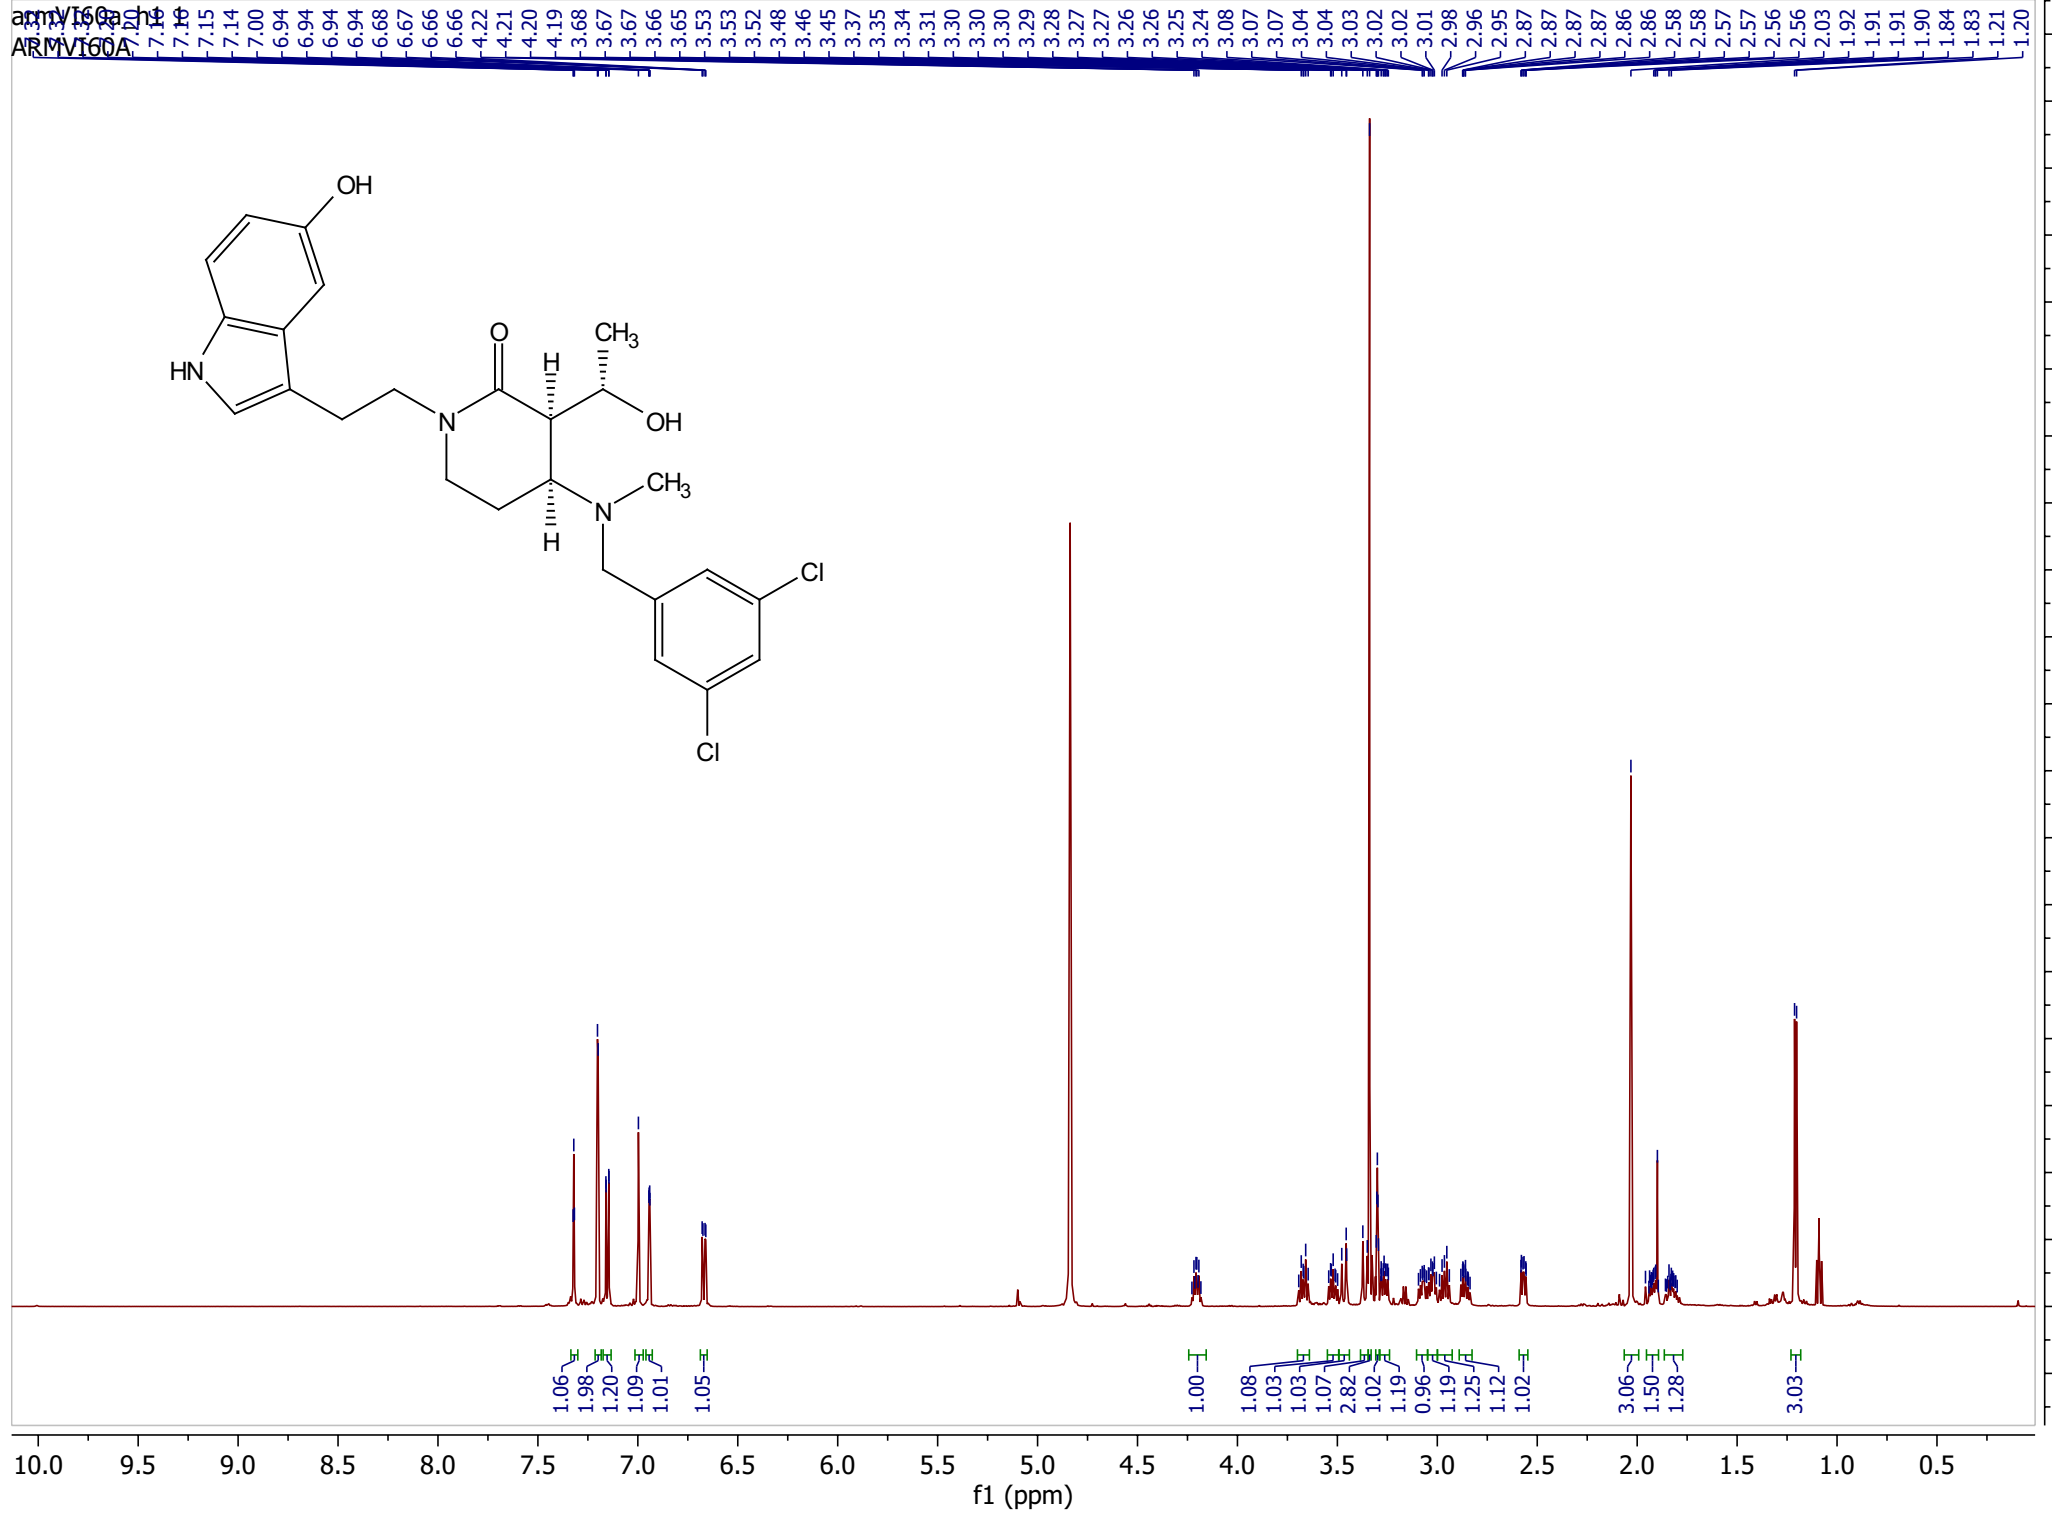

armVI60a\_c13  
ARMVI60A

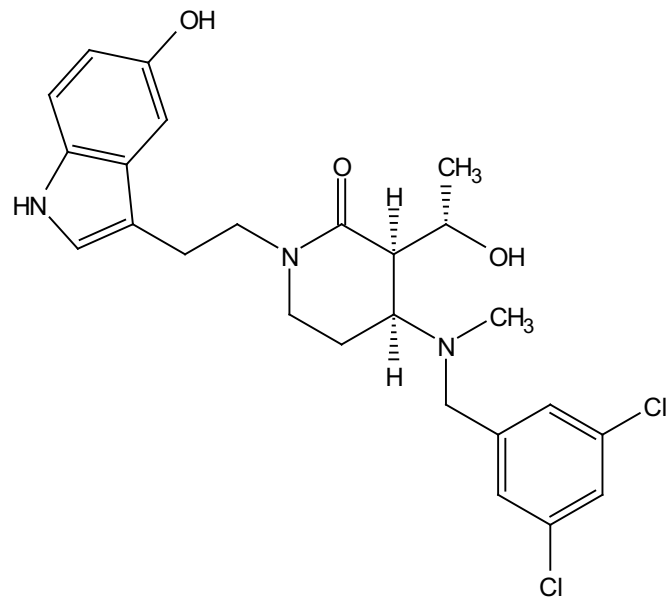

—171.89

—151.27

—143.71

—136.20

—132.98

—129.59

—128.51

—128.43

—124.52

—112.84

—112.48

—112.13

—103.51

—67.71

—61.18

—58.44

—51.14

49.28 cd3od

49.14 cd3od

49.00 cd3od

48.86 cd3od

48.72 cd3od

48.57 cd3od

—46.62

—38.47

—24.00

—22.83

—22.52

—22.47

230 220 210 200 190 180 170 160 150 140 130 120 110 100 90 80 70 60 50 40 30 20 10 0 -10  
f1 (ppm)

1100  
1000  
900  
800  
700  
600  
500  
400  
300  
200  
100  
0  
-100

PROTON\_01  
LL\_02\_150\_column

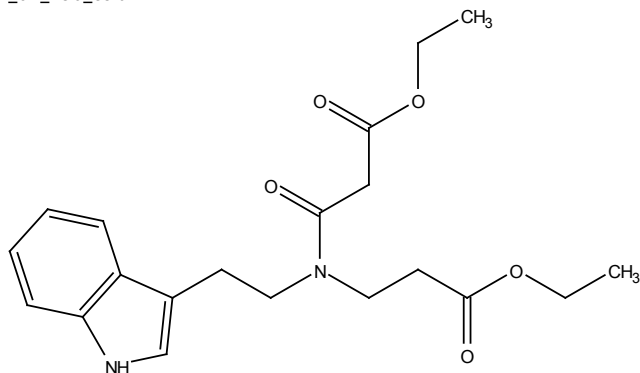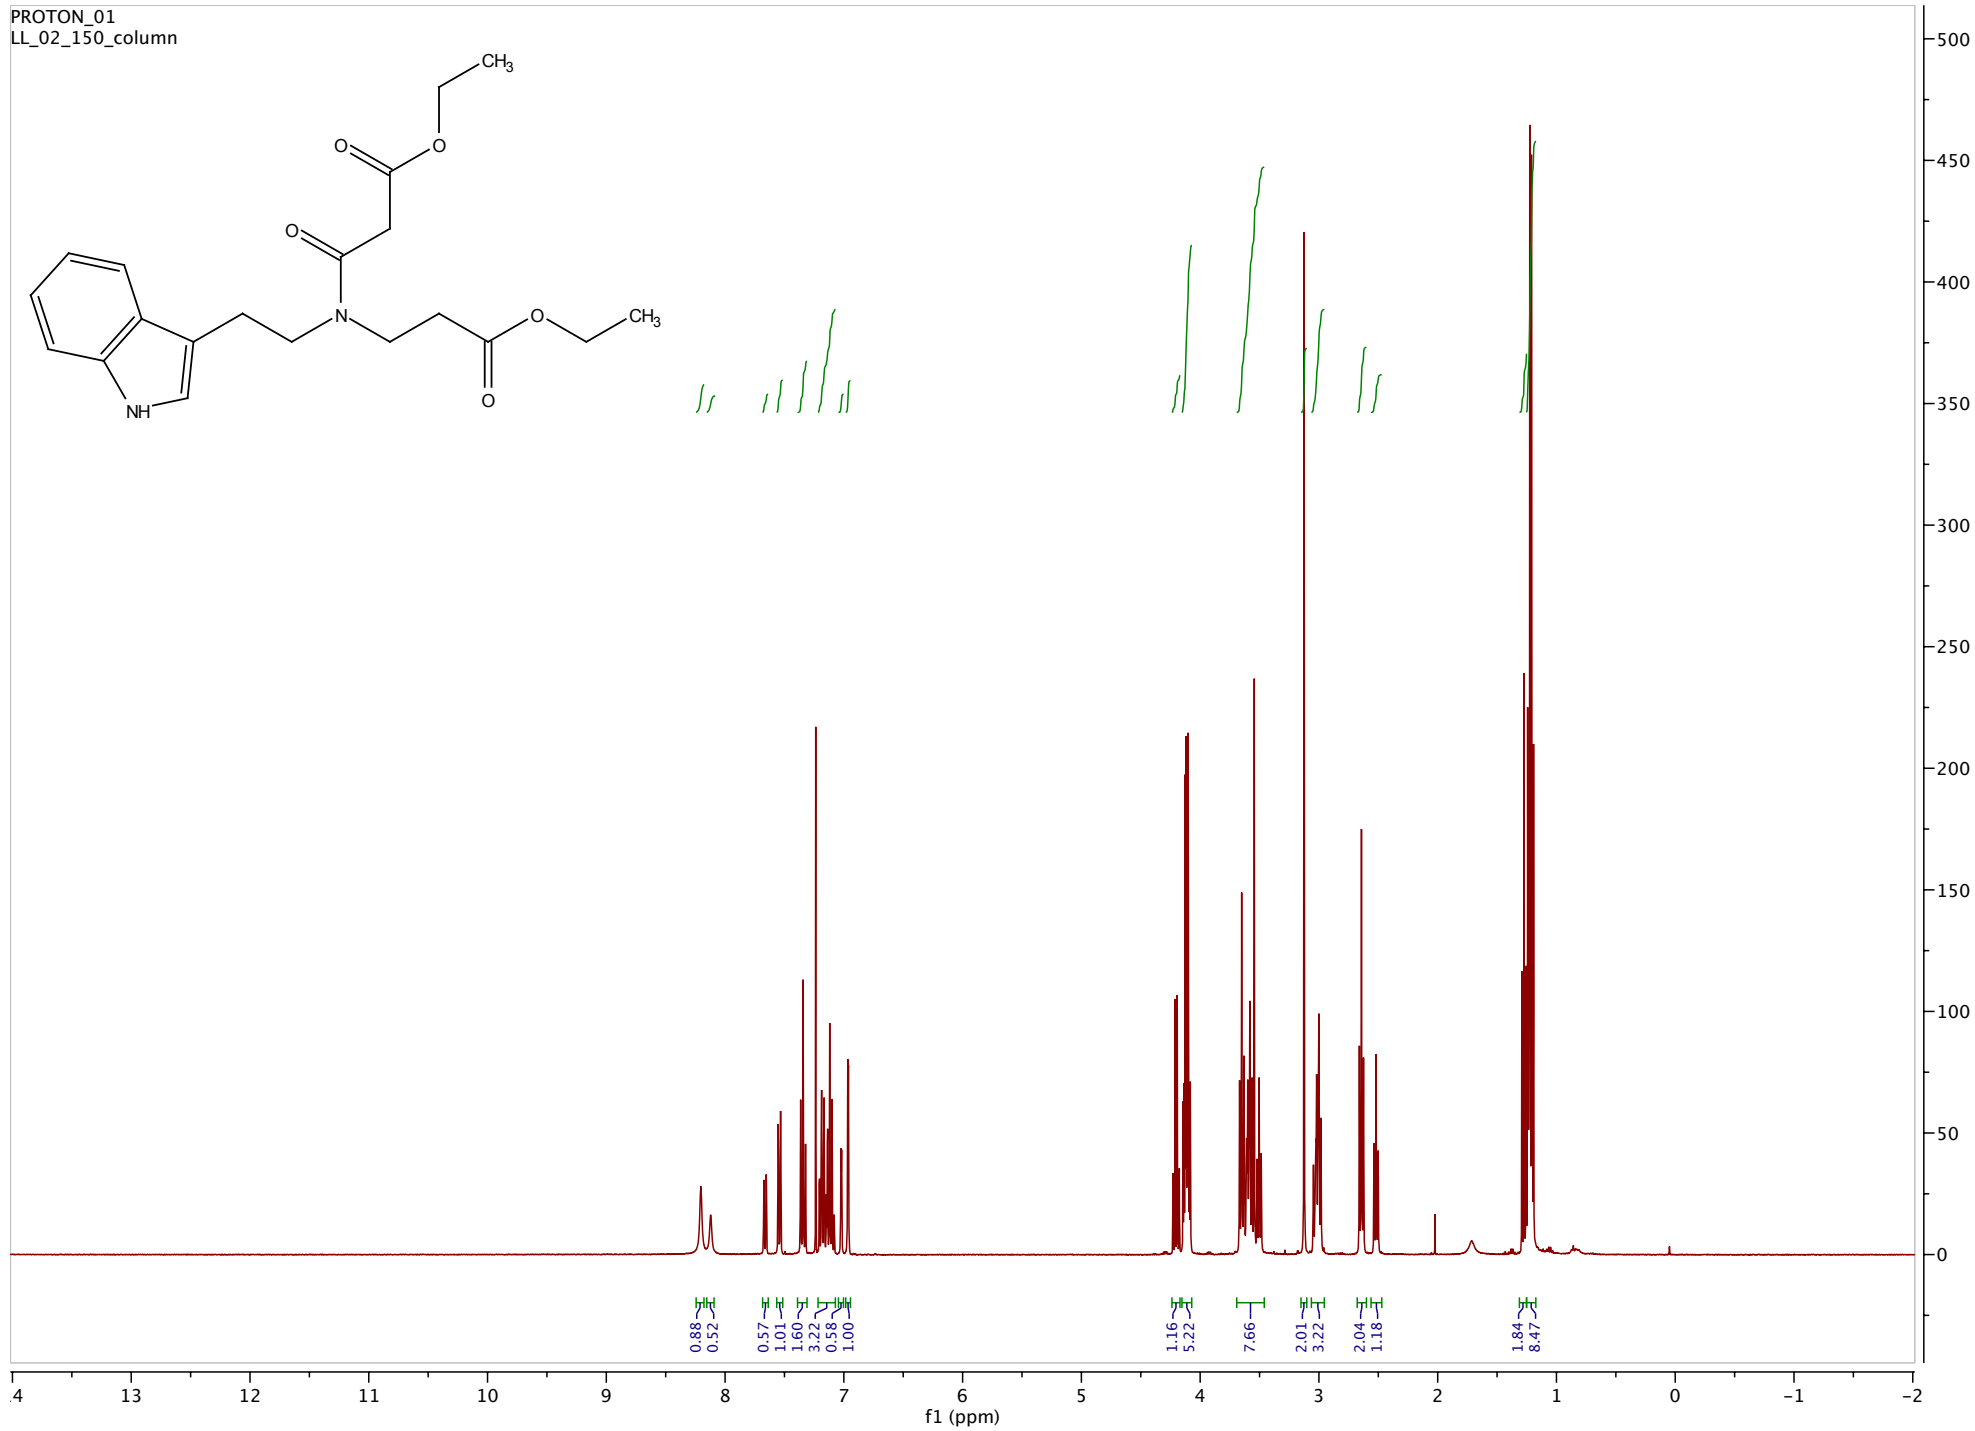

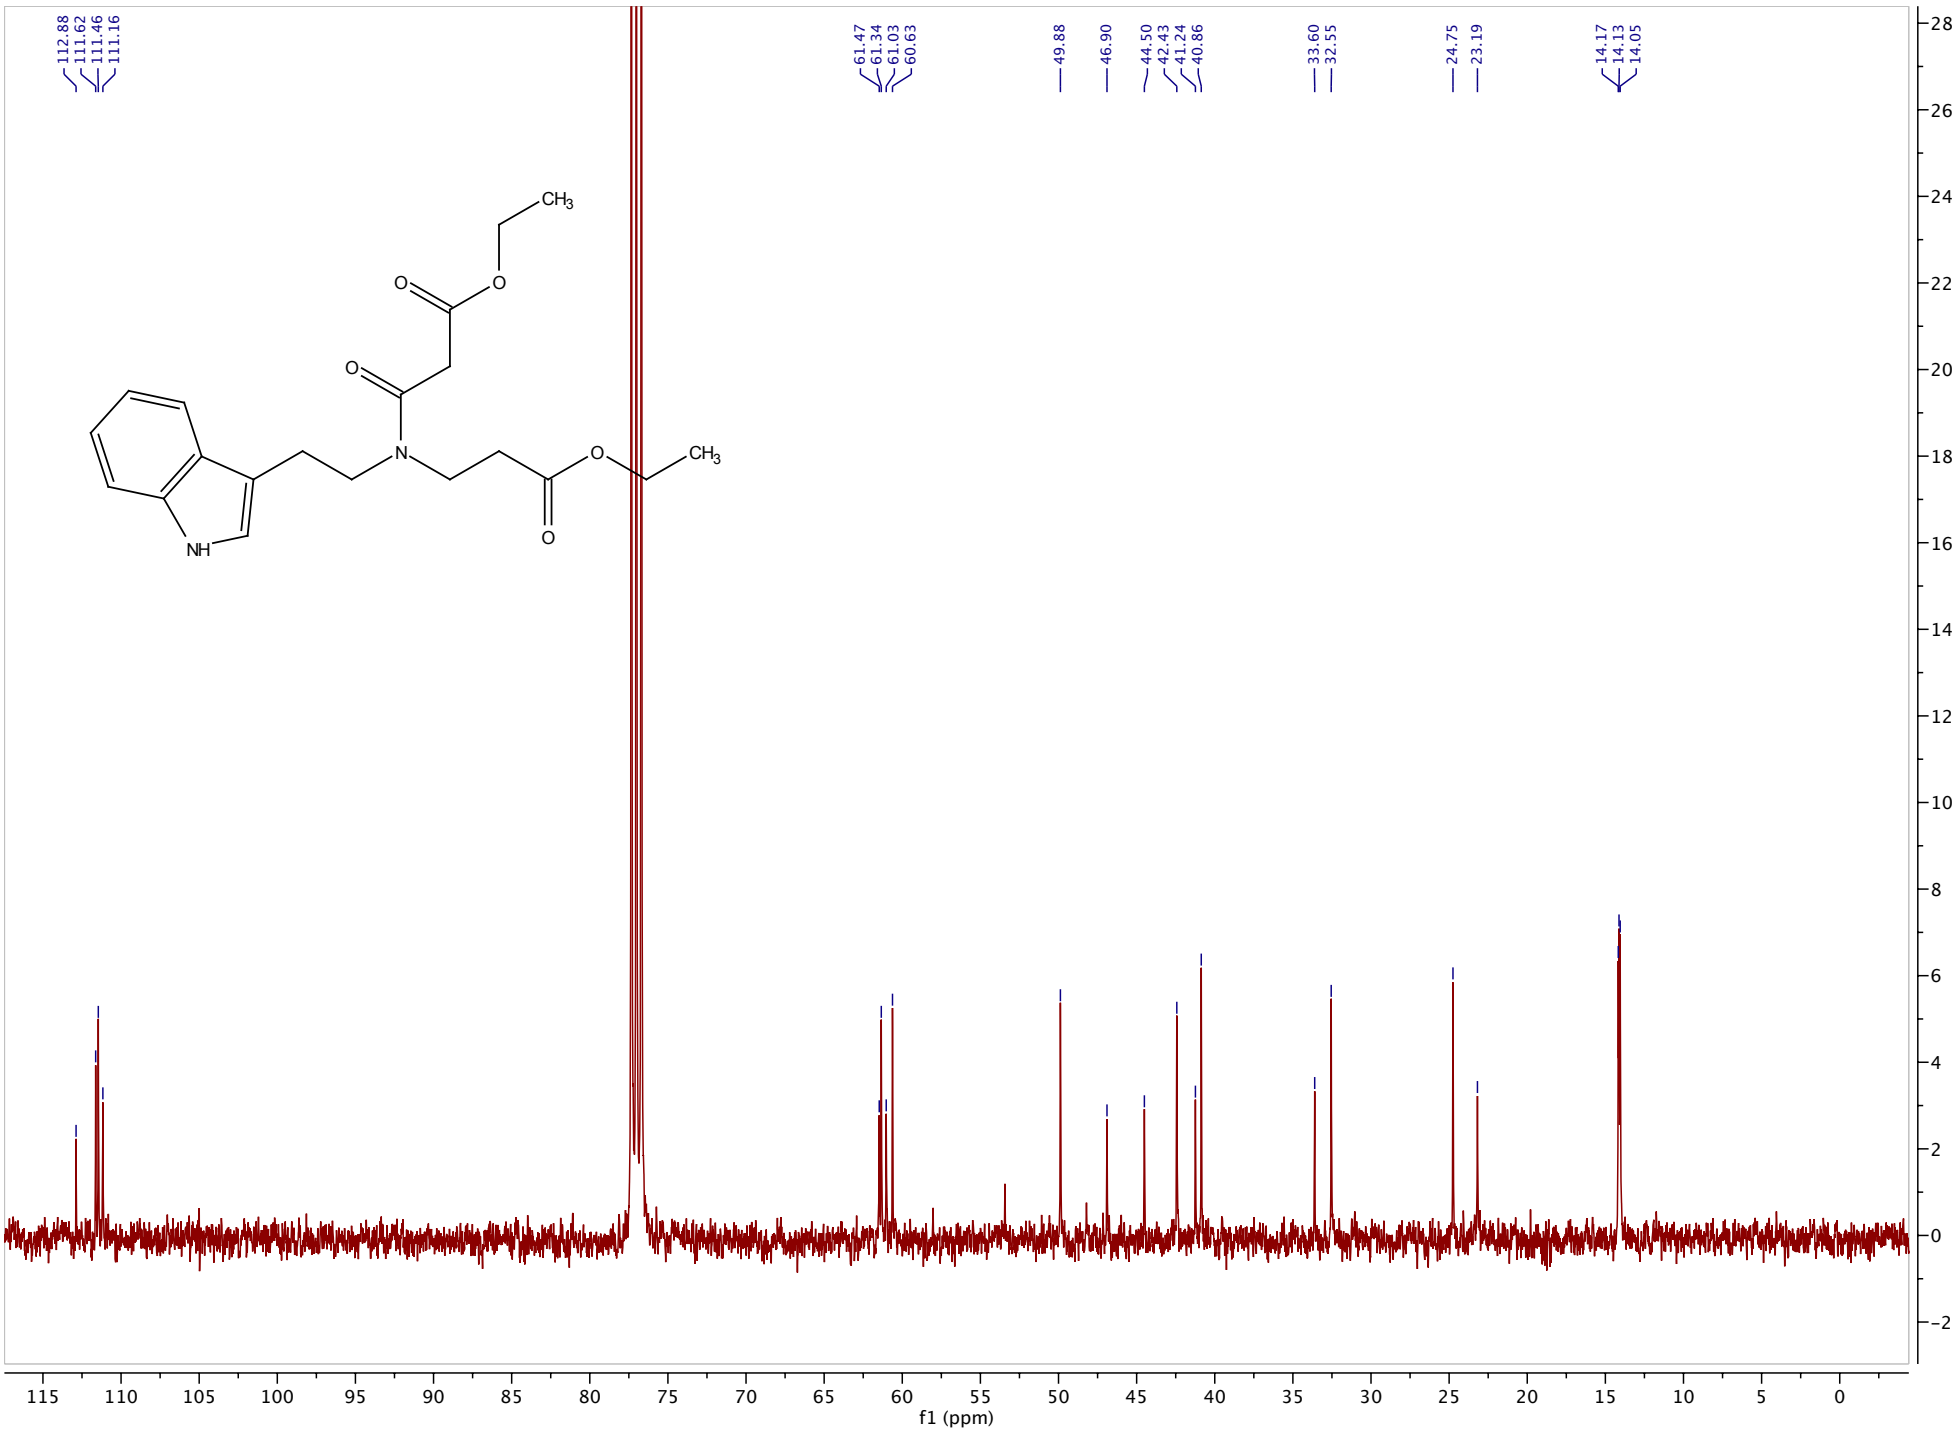

LL\_02\_124\_01

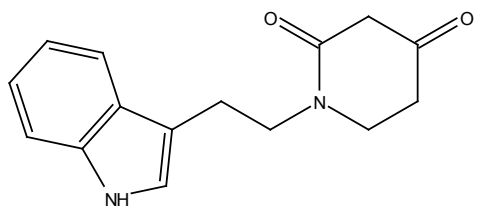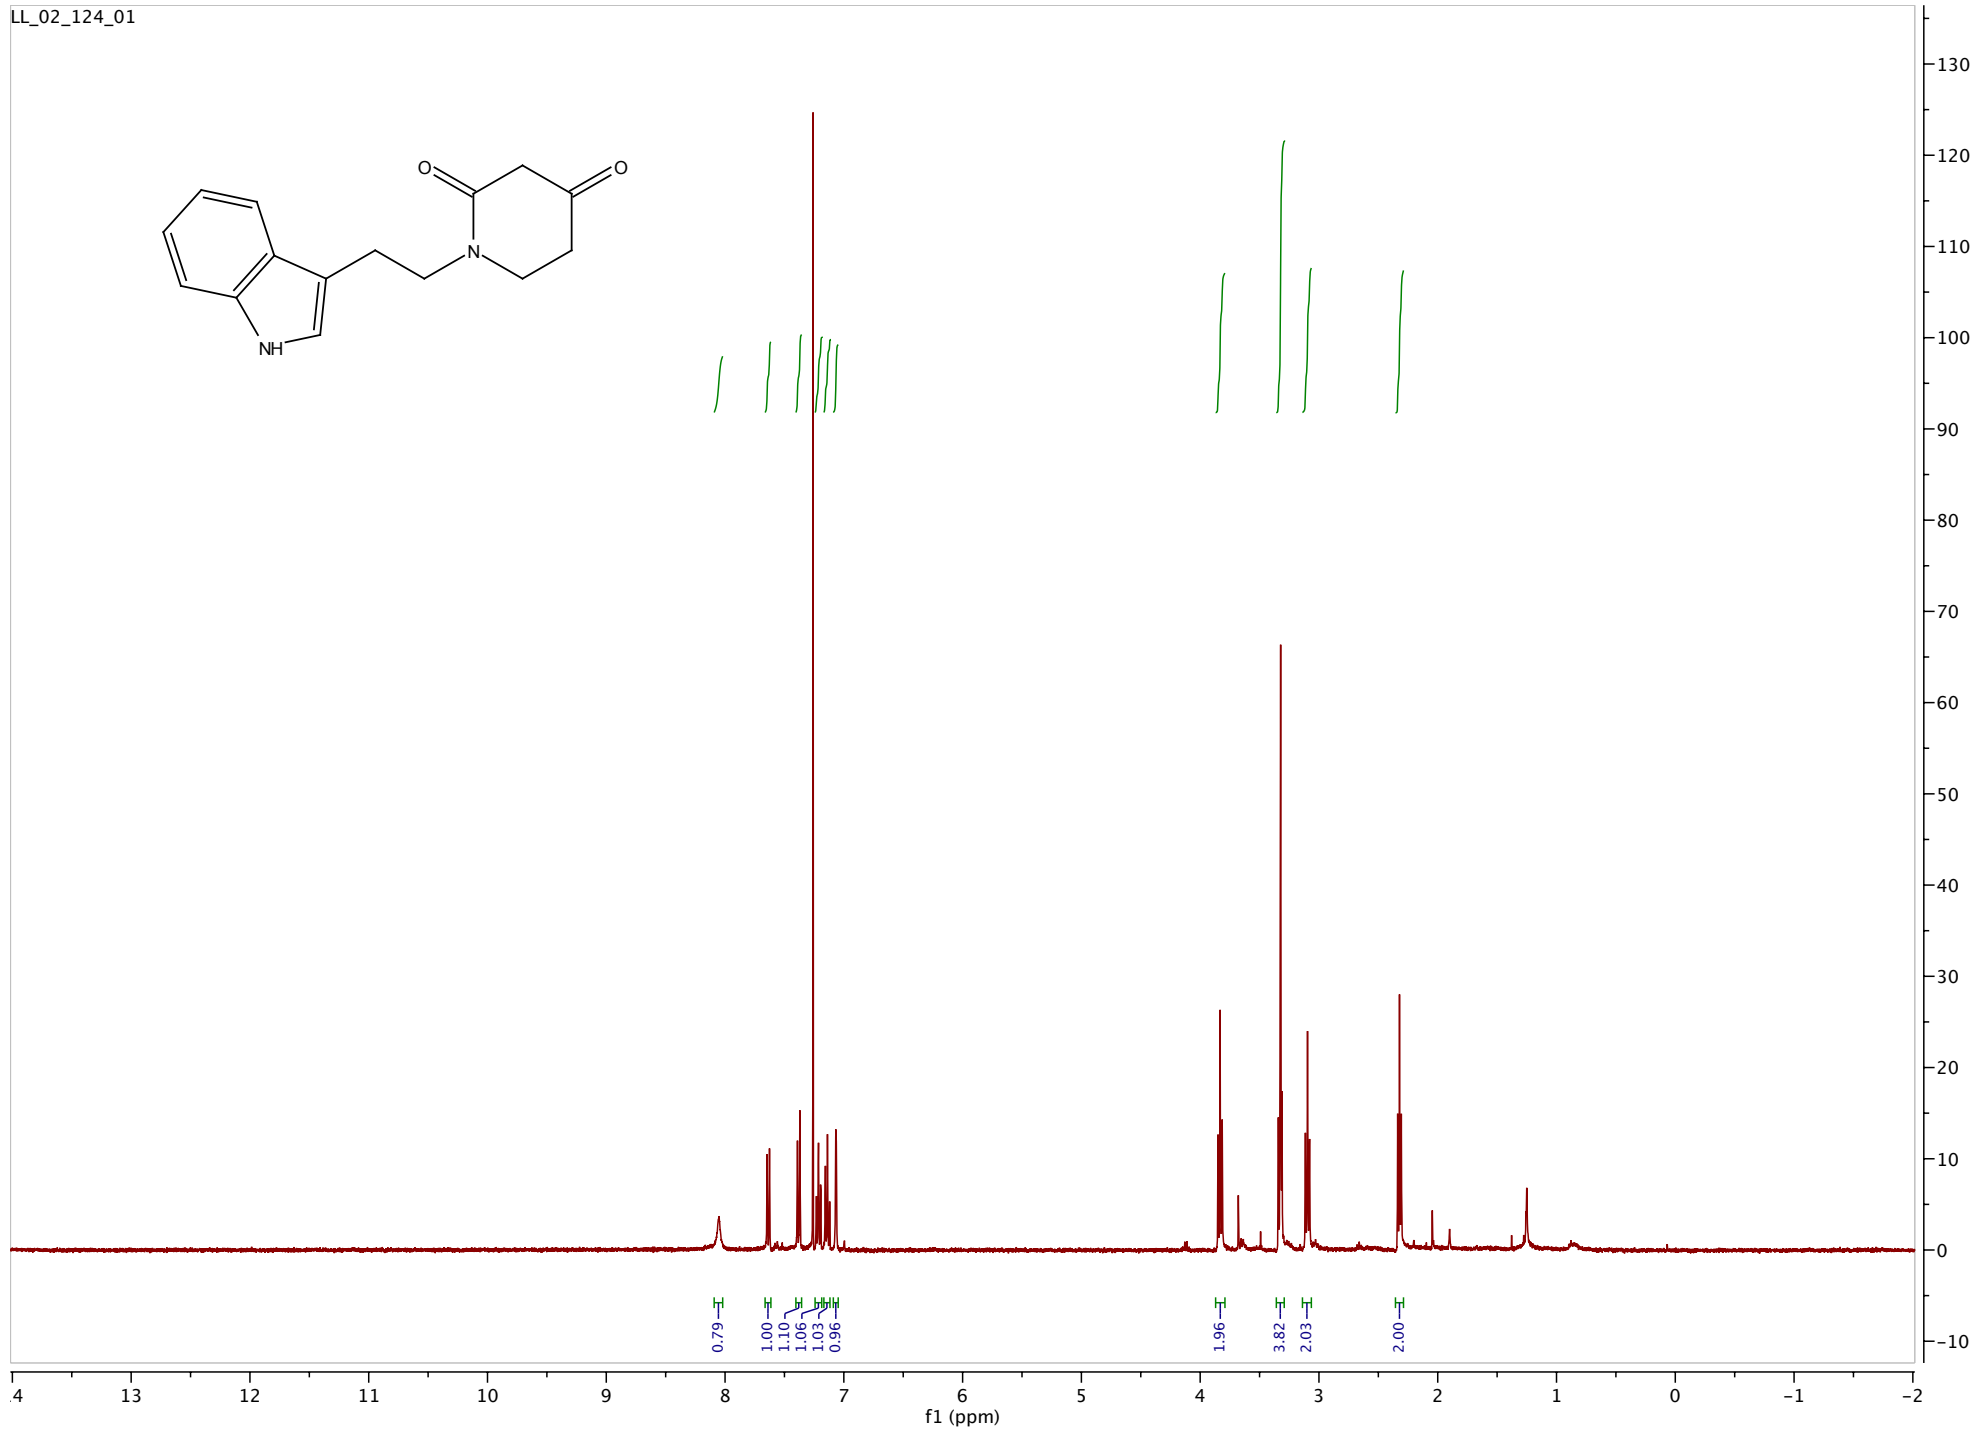



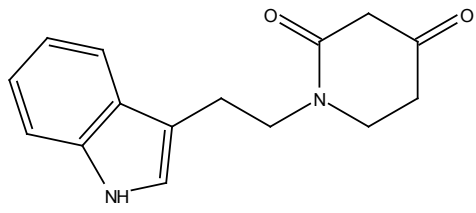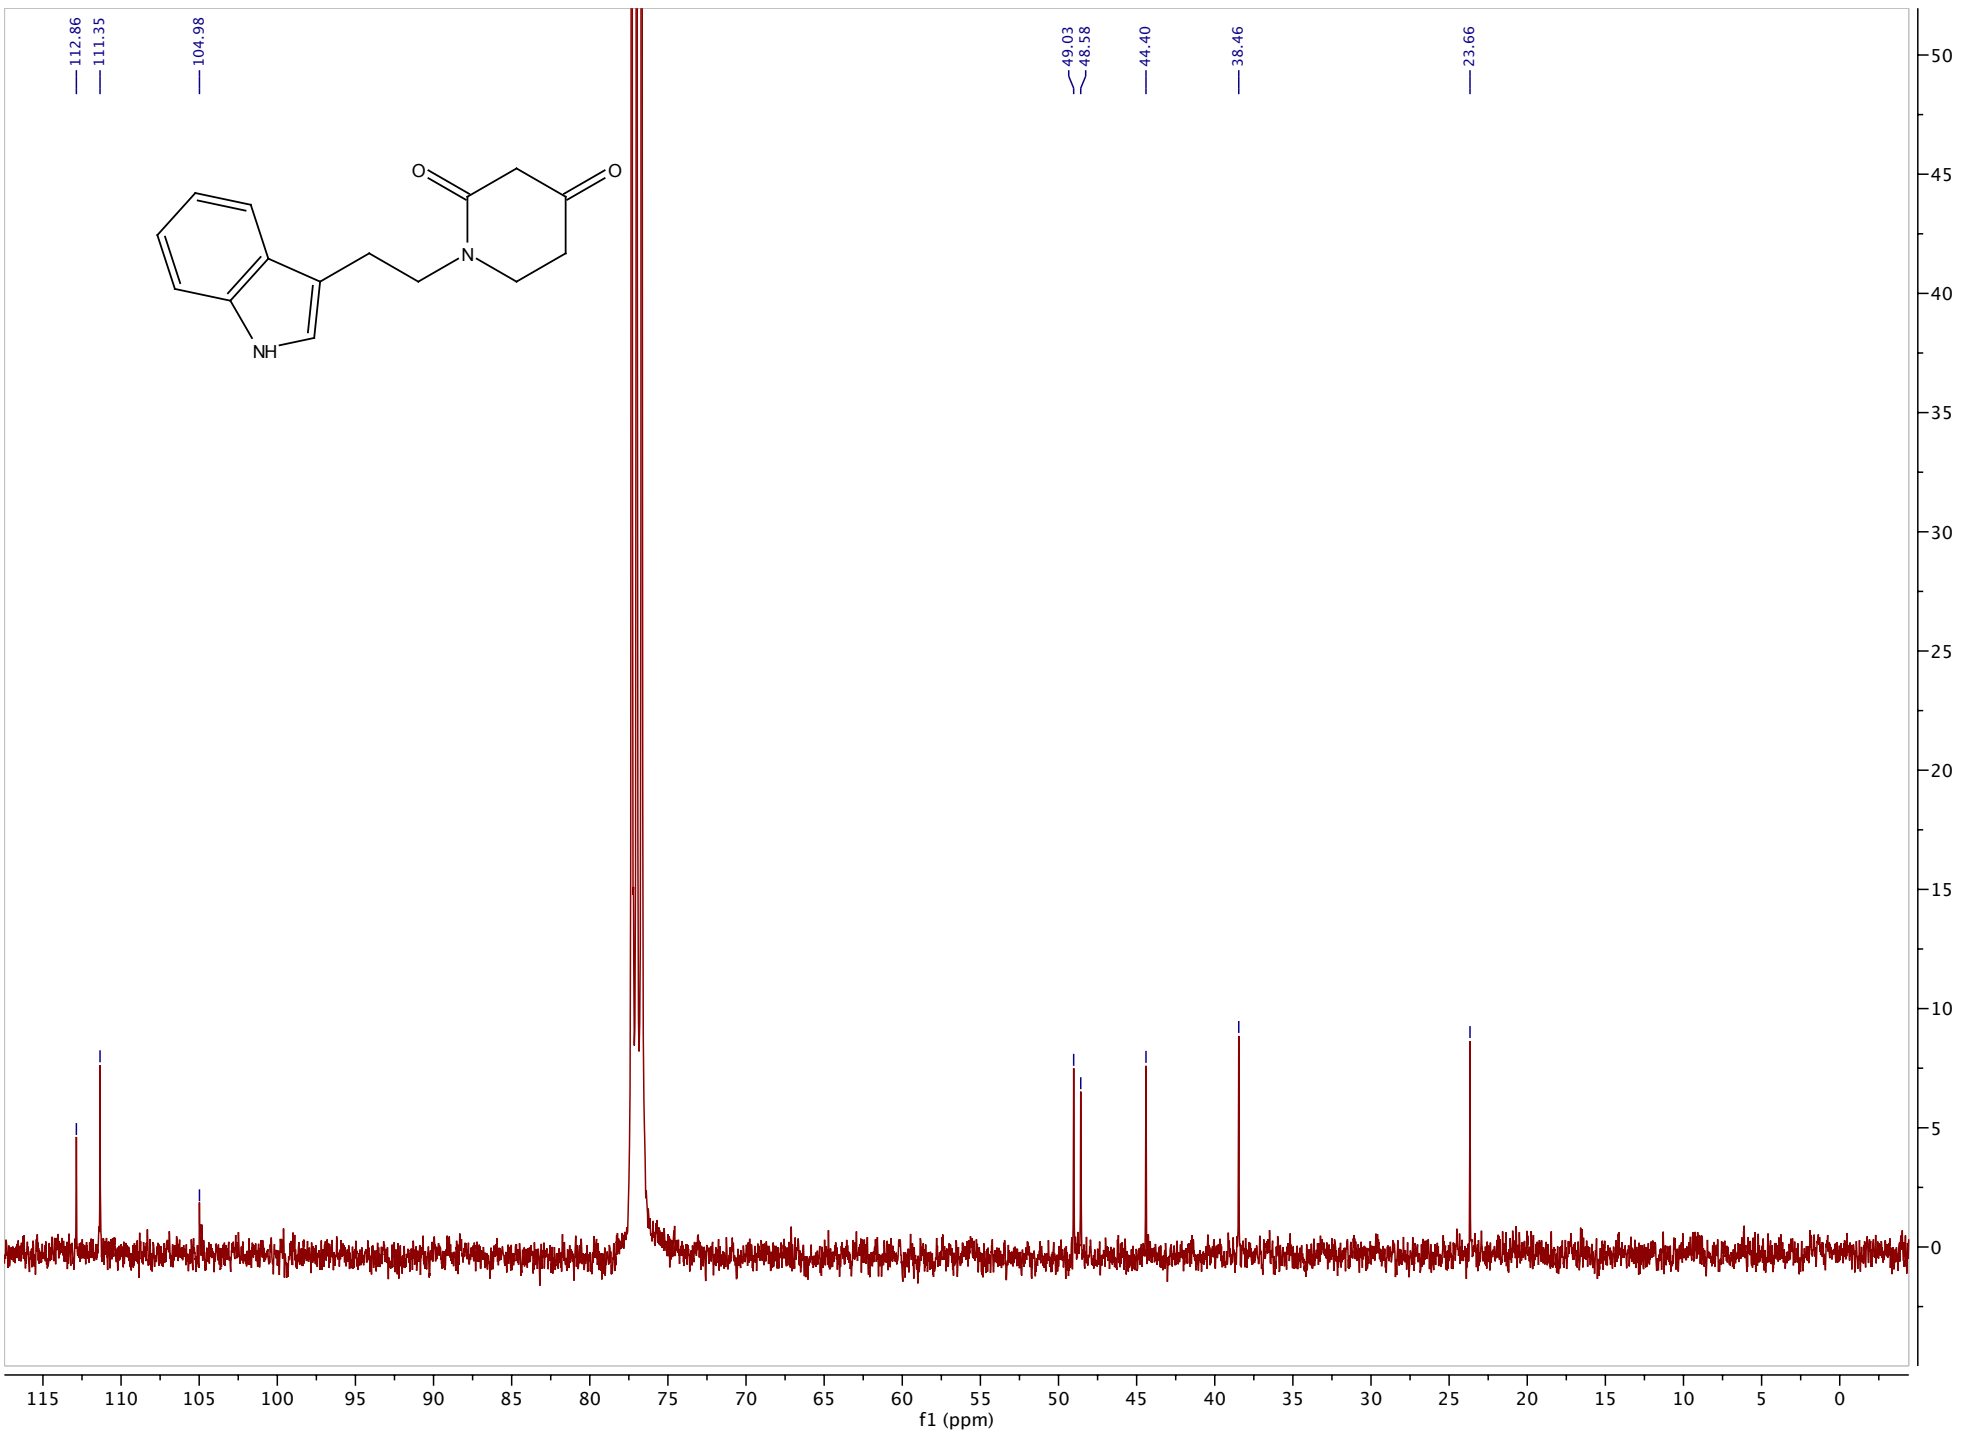

LL\_02\_97\_3\_01

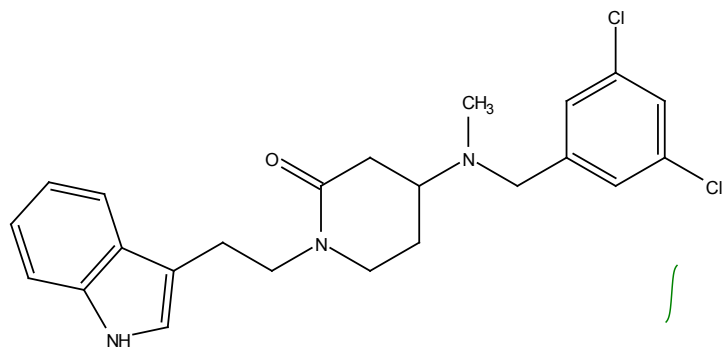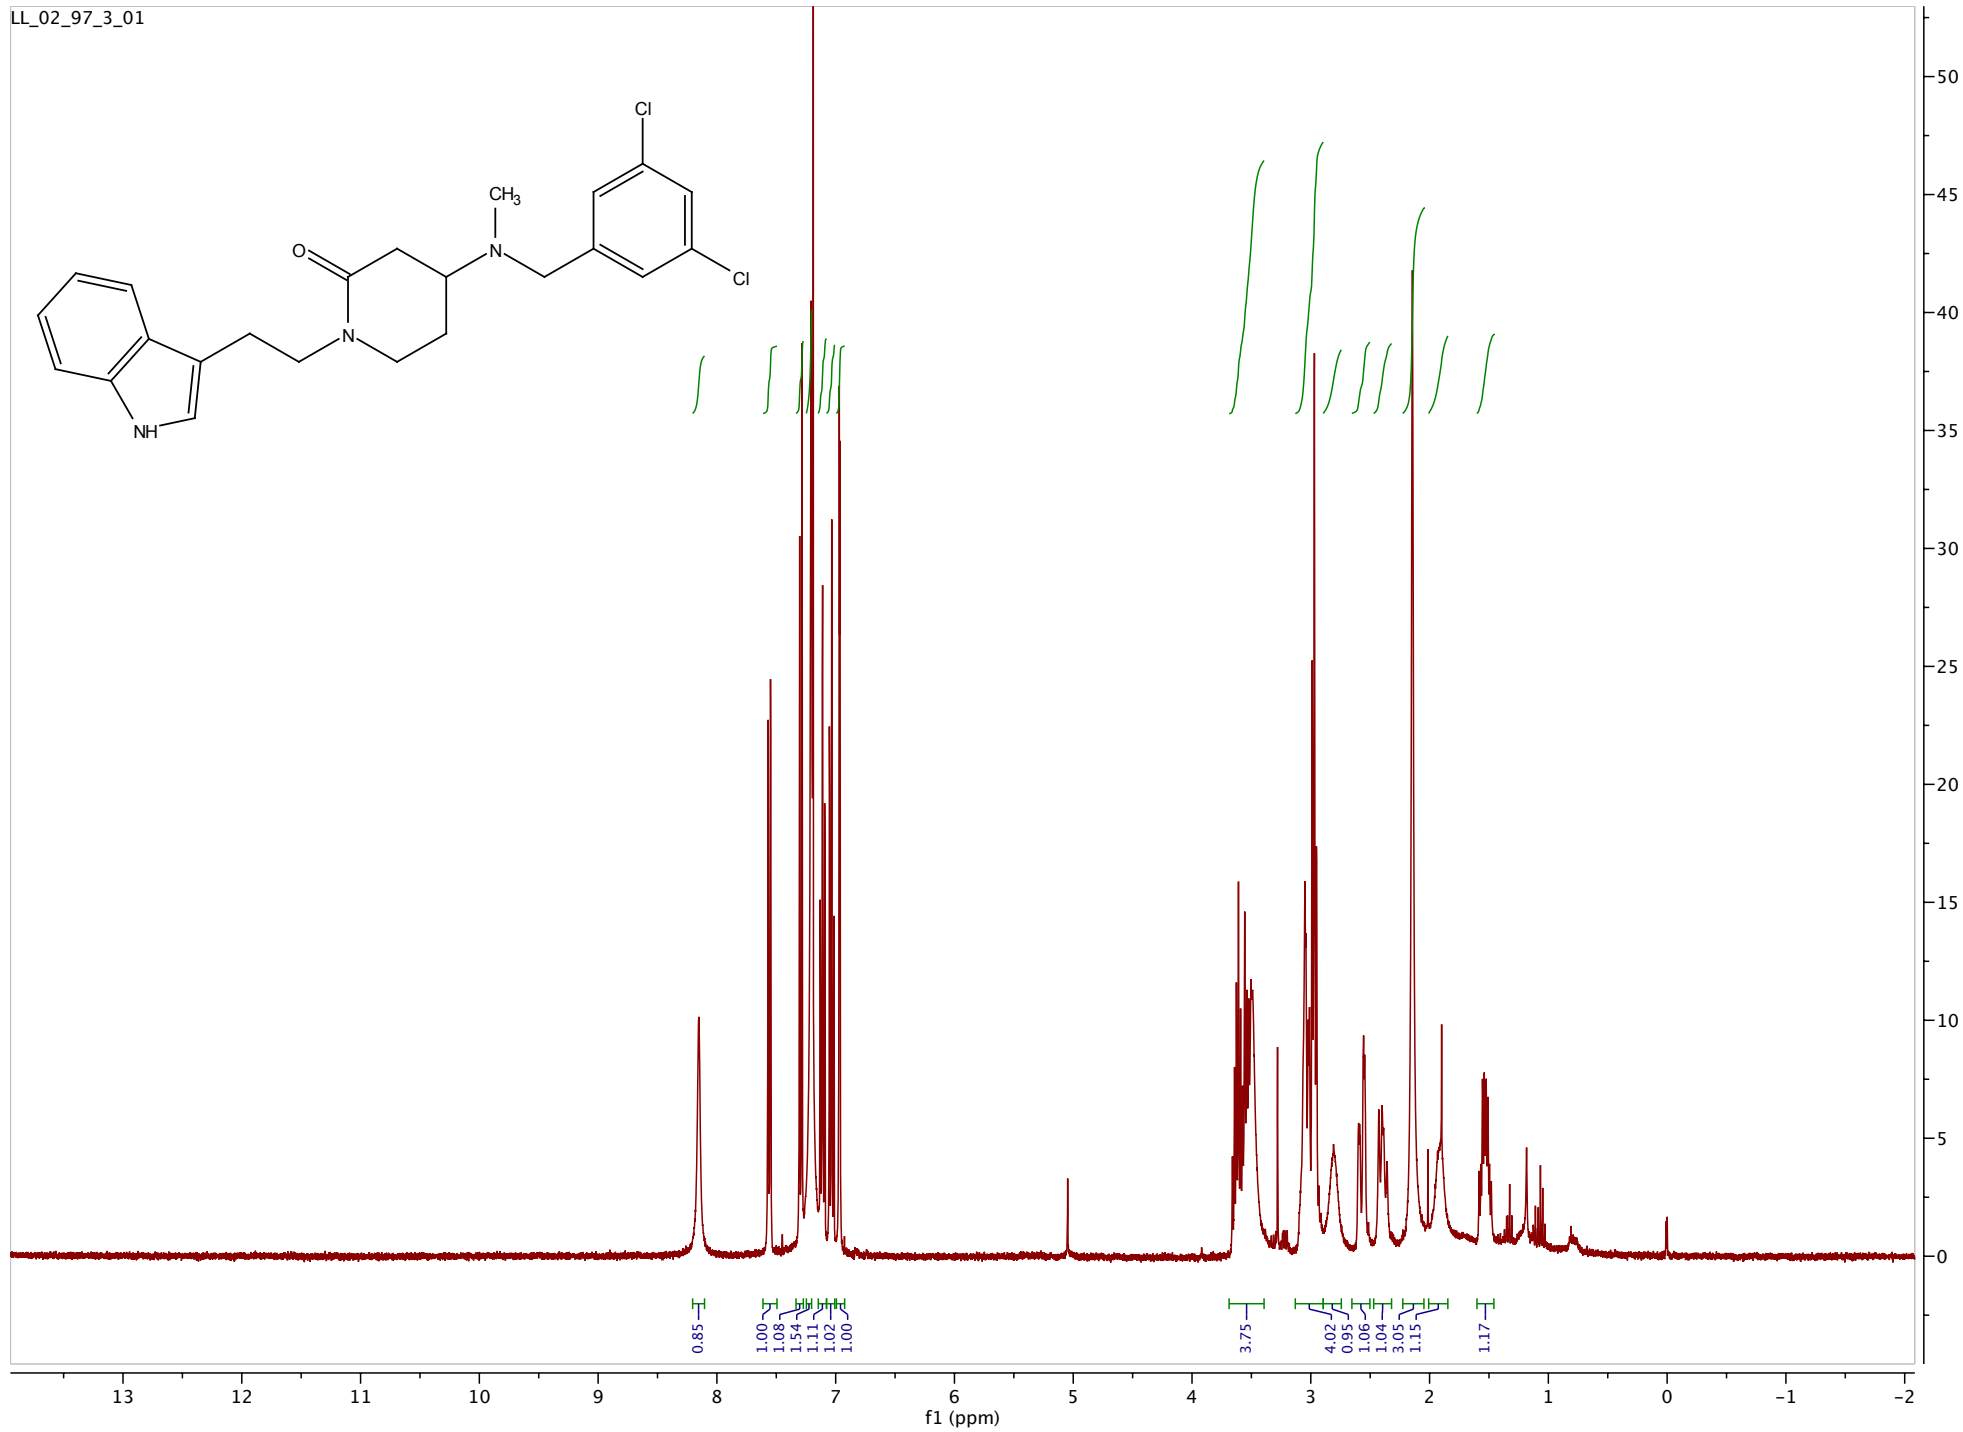

LL\_02\_97\_04\_C13\_01

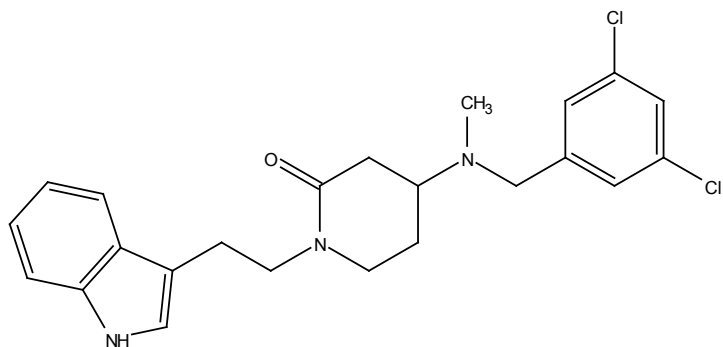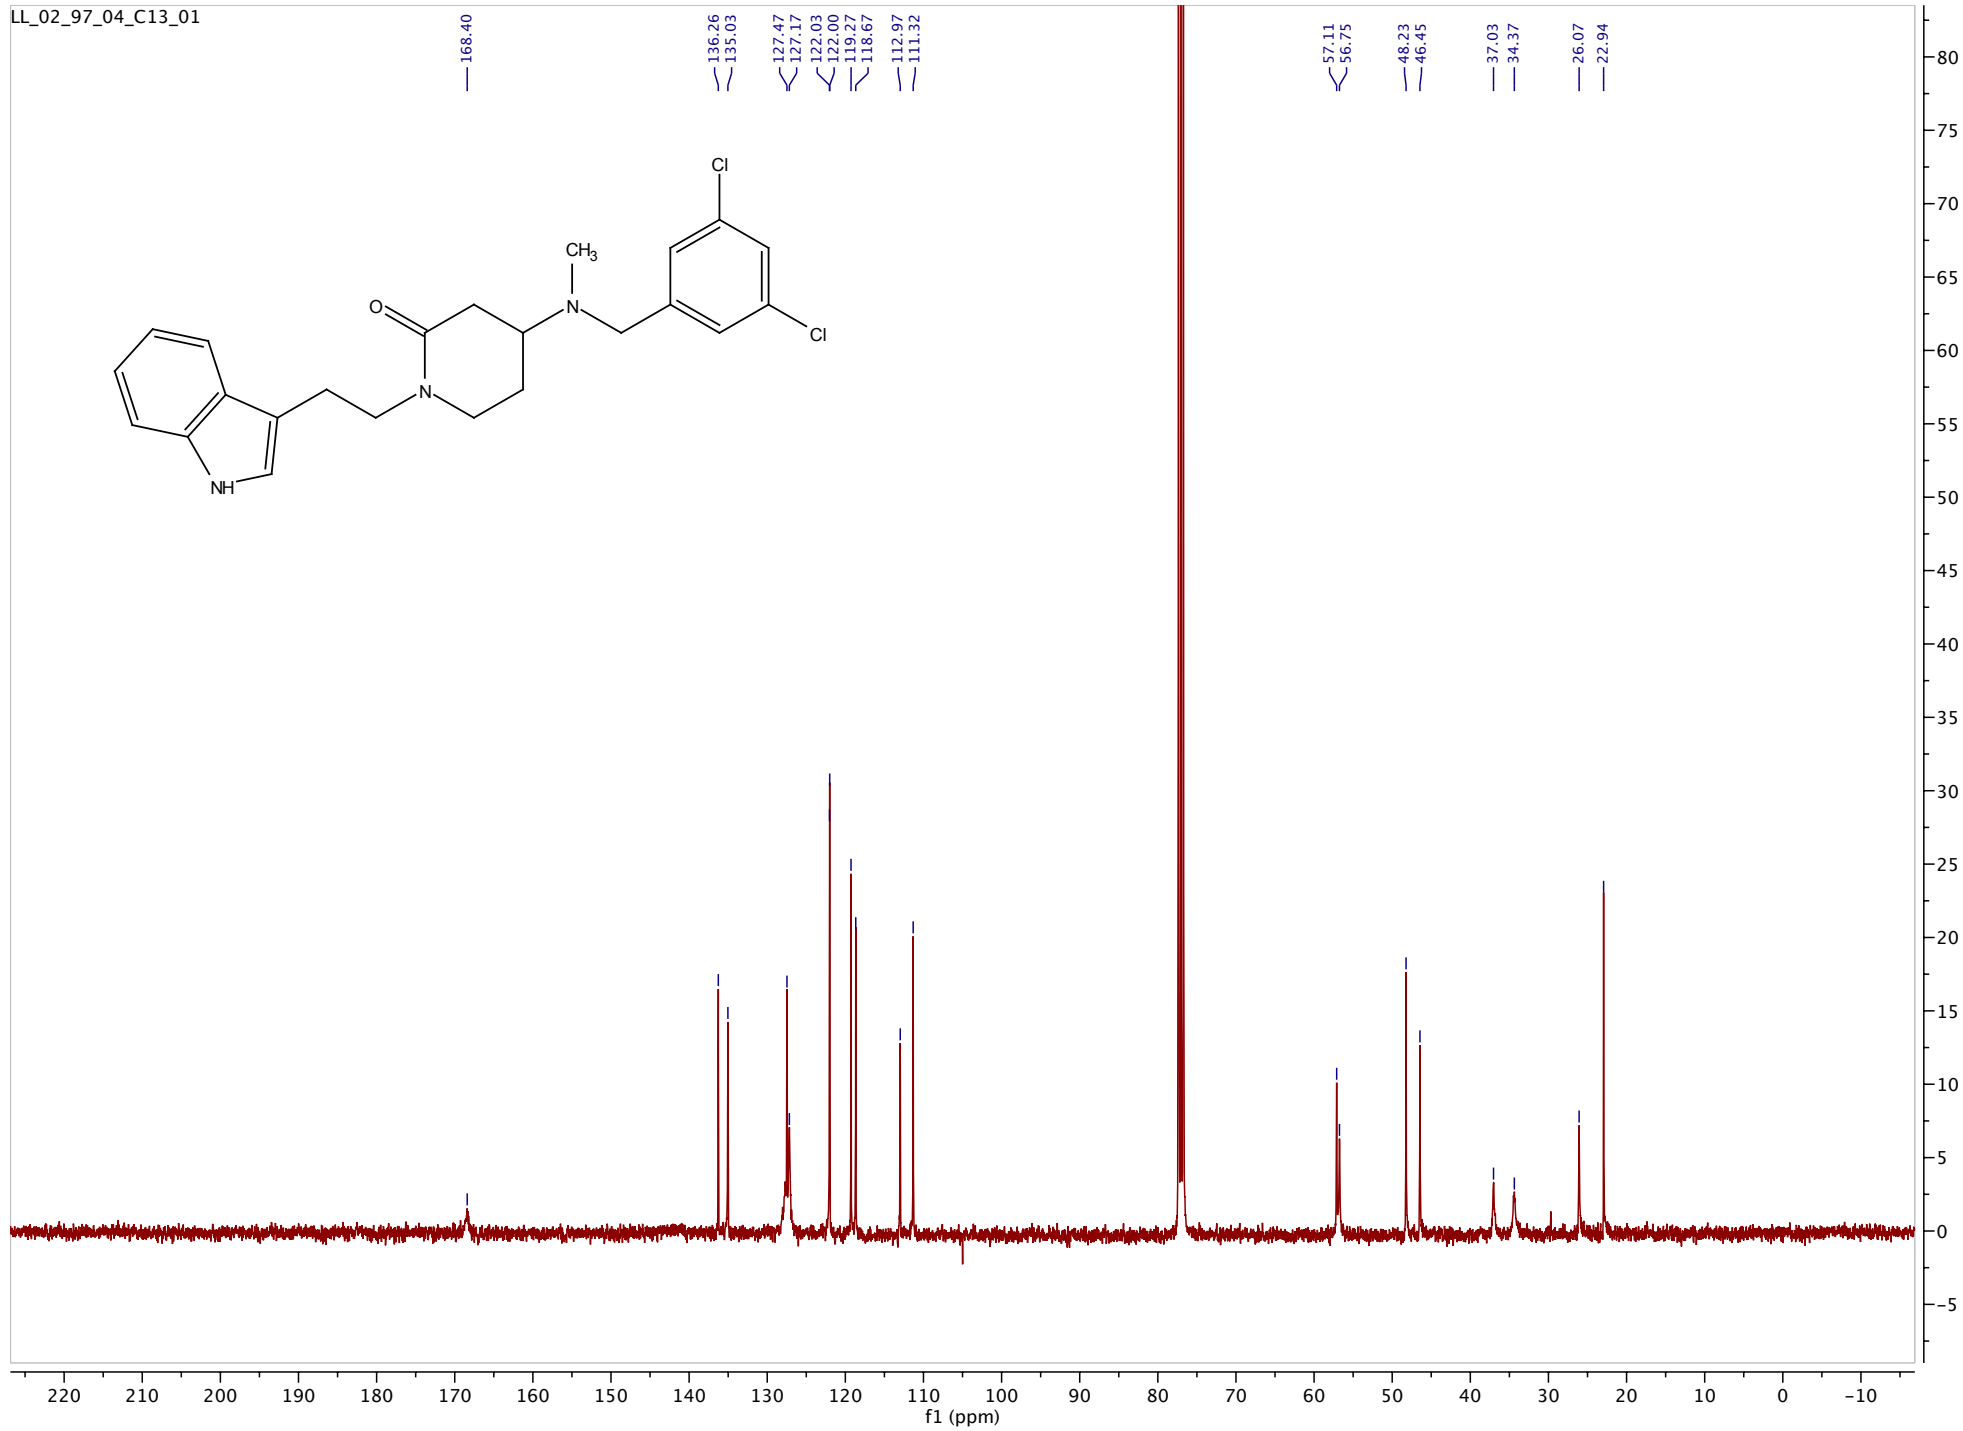

PROTON\_01  
LTL02185

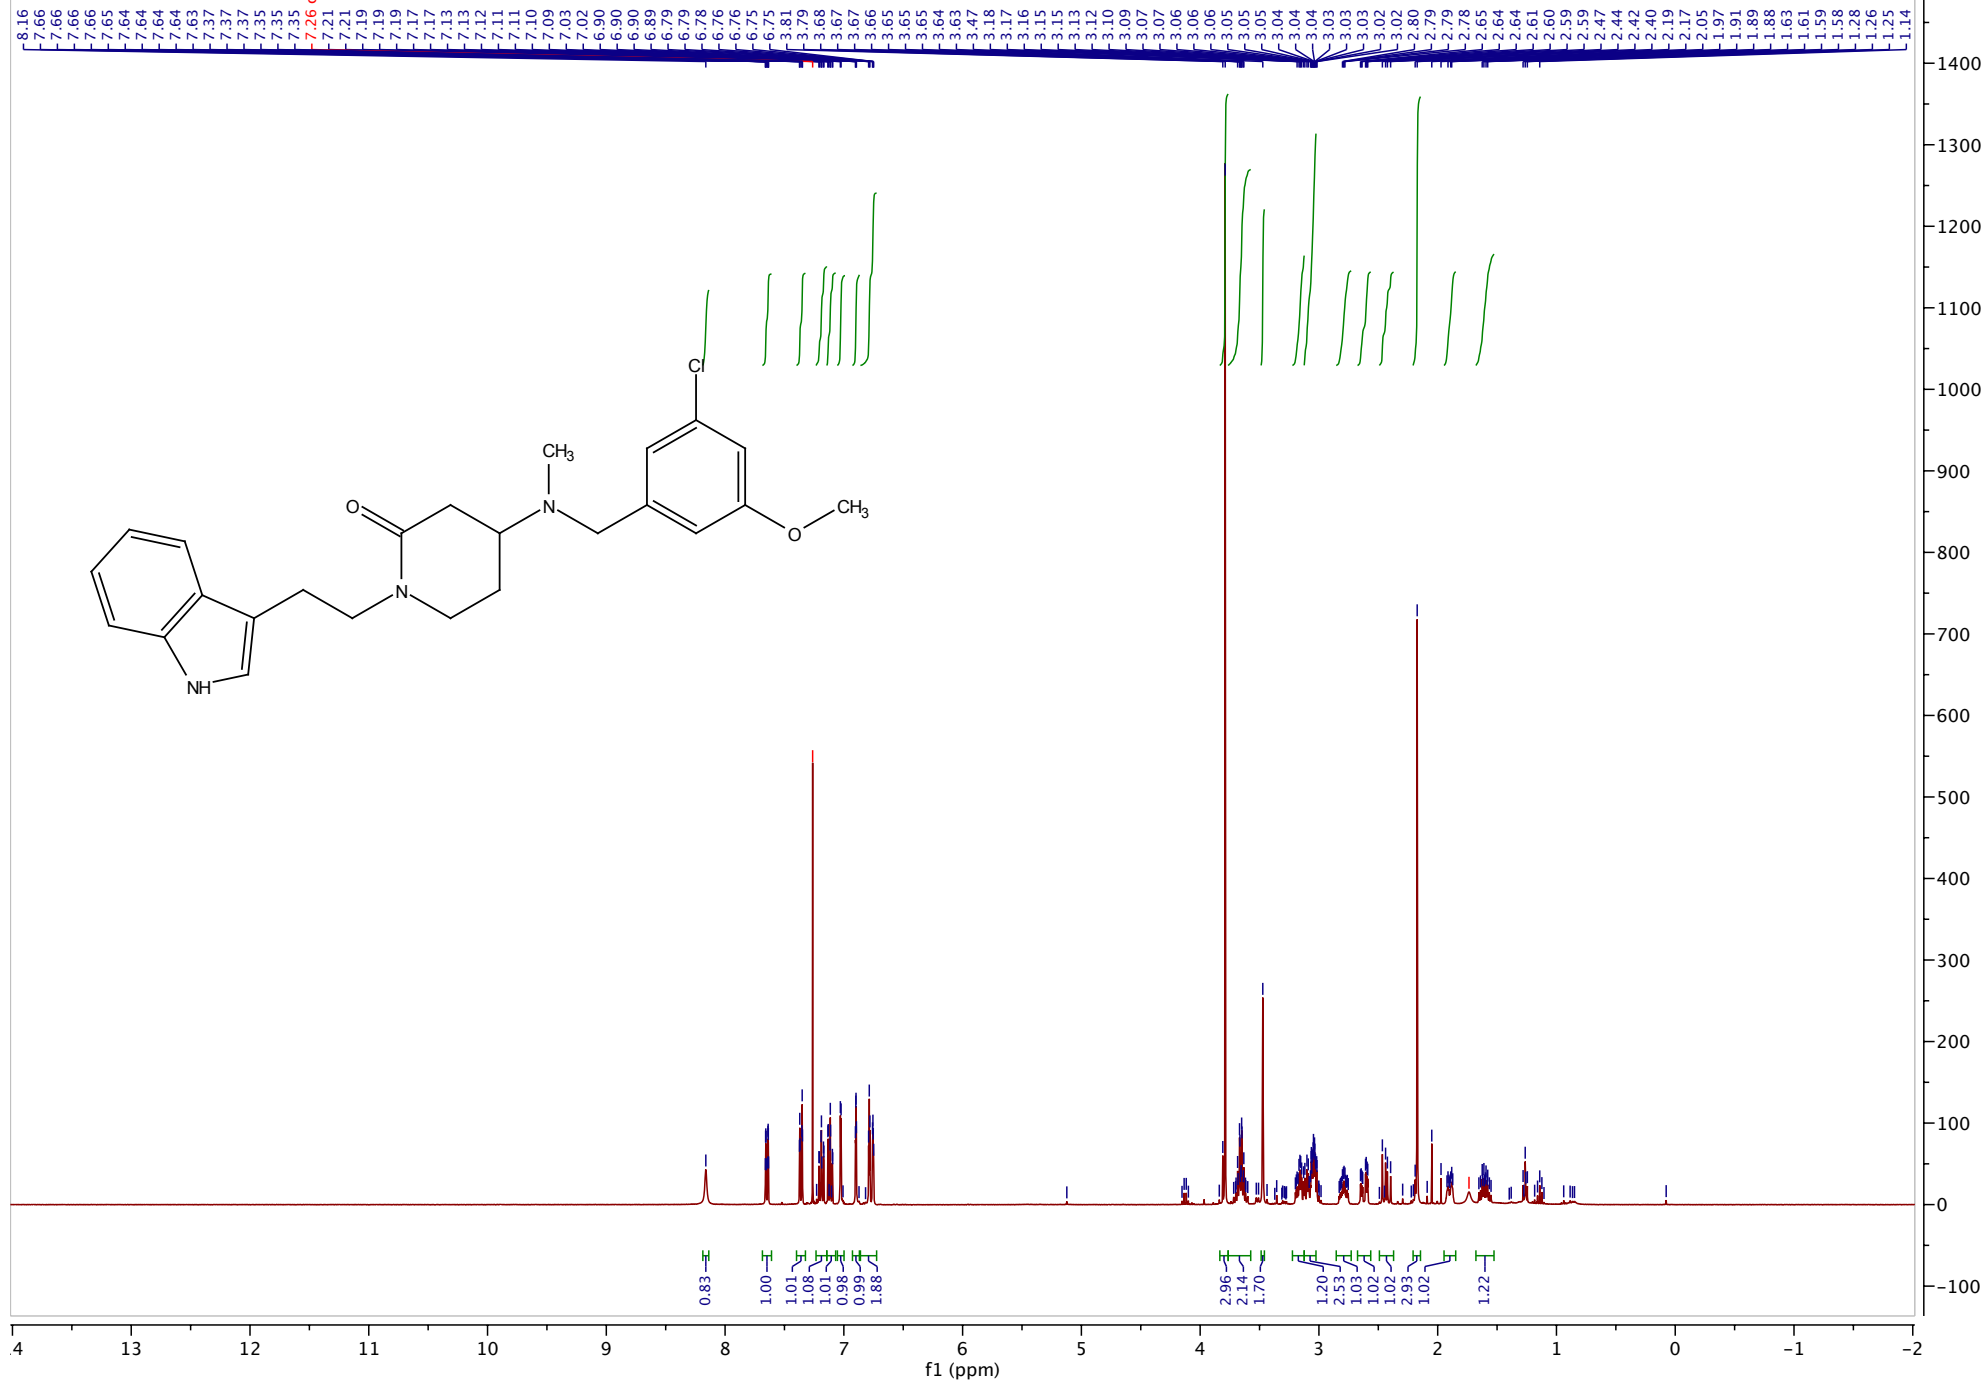

CARBON\_01  
LTL02185

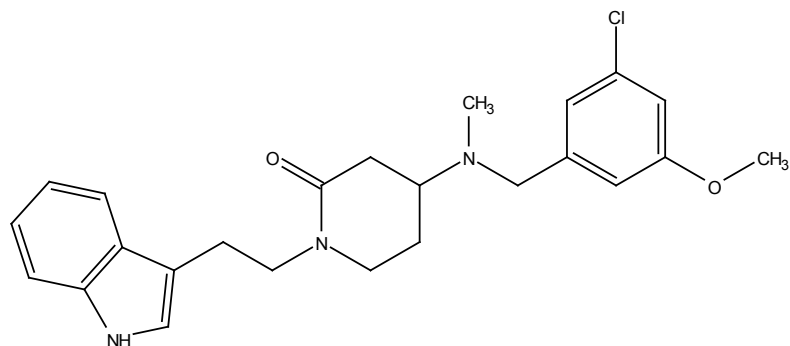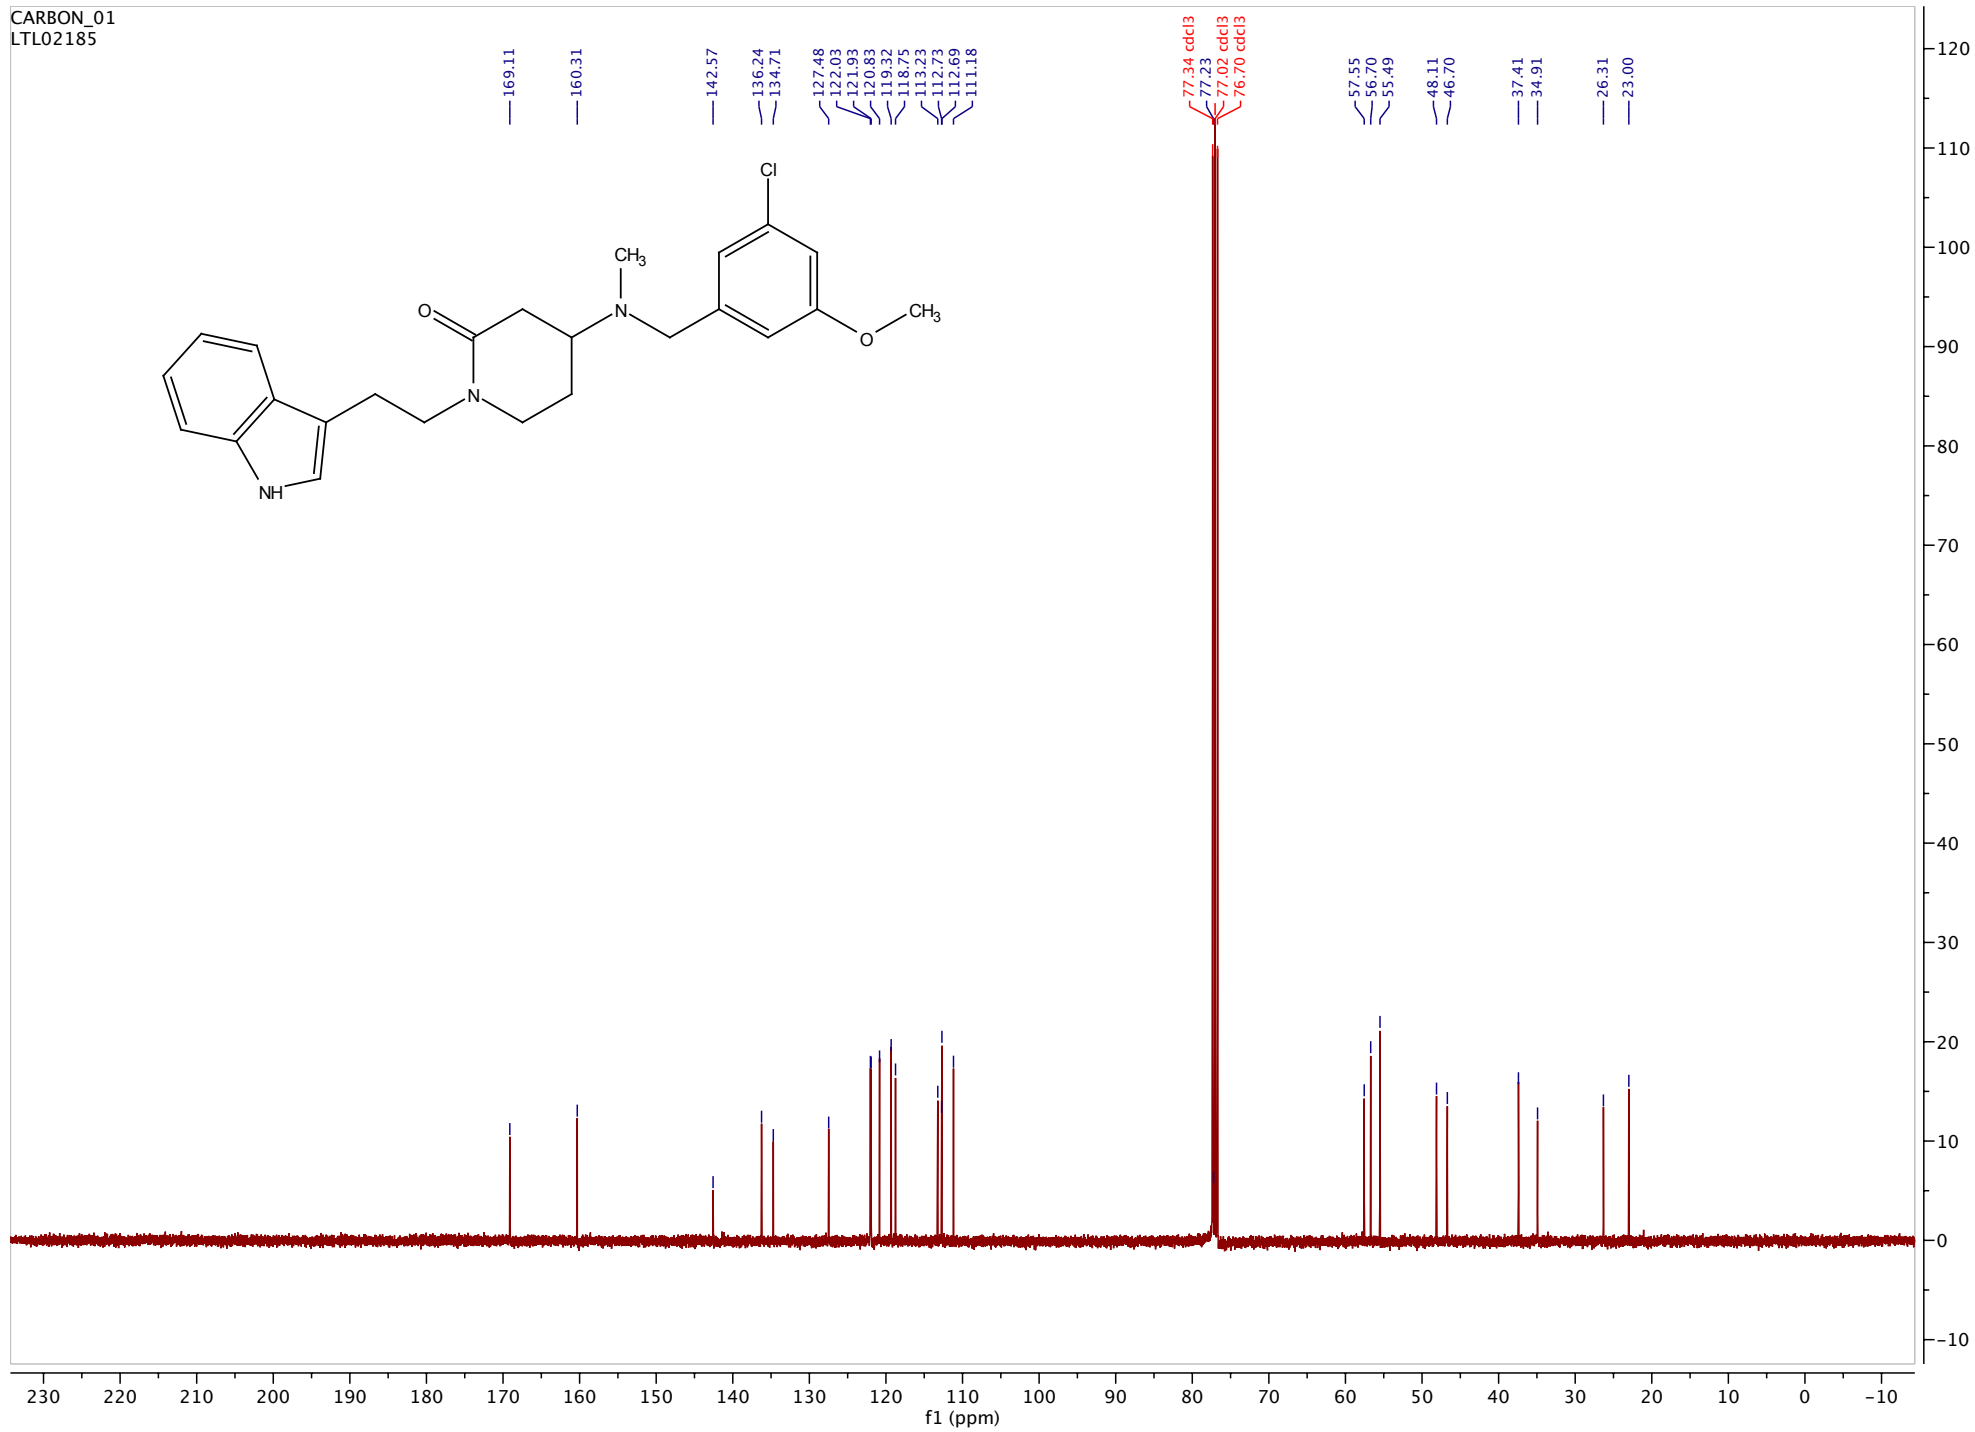

PROTON\_01  
LTL04013

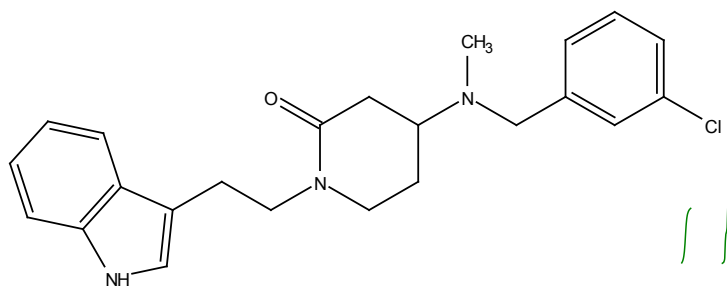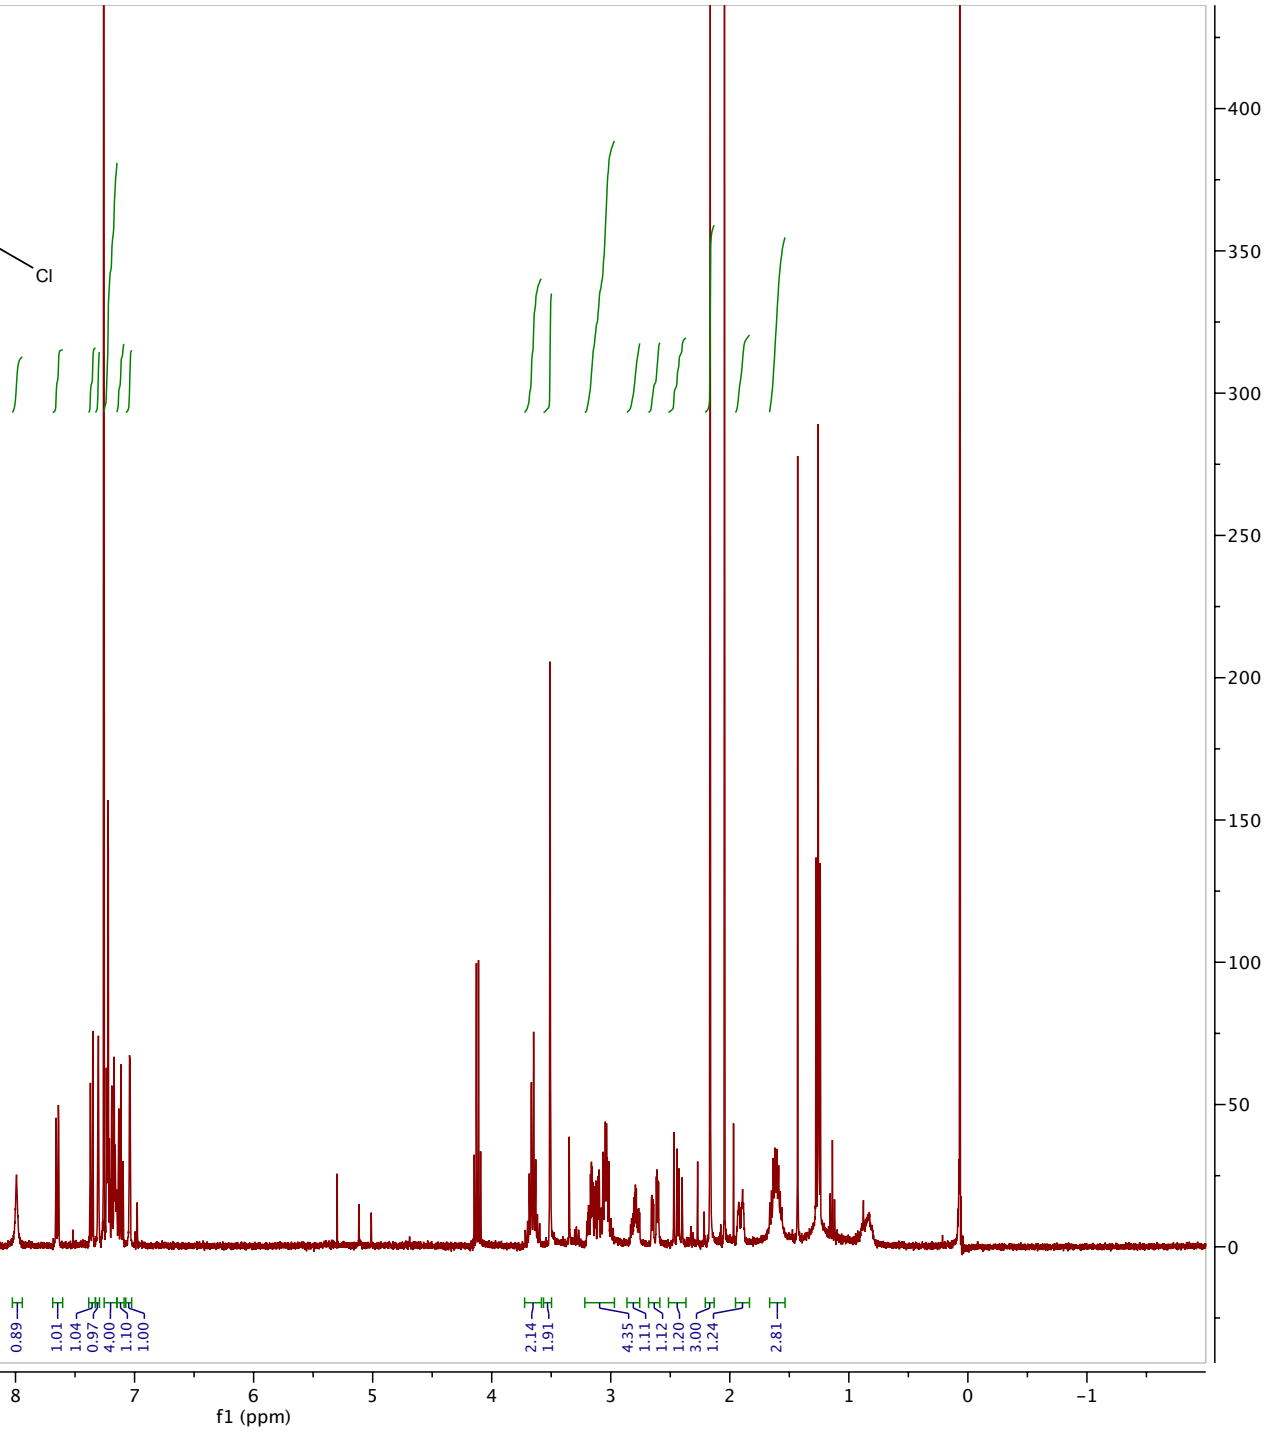

PROTON\_01  
LL\_02\_154\_lyoph

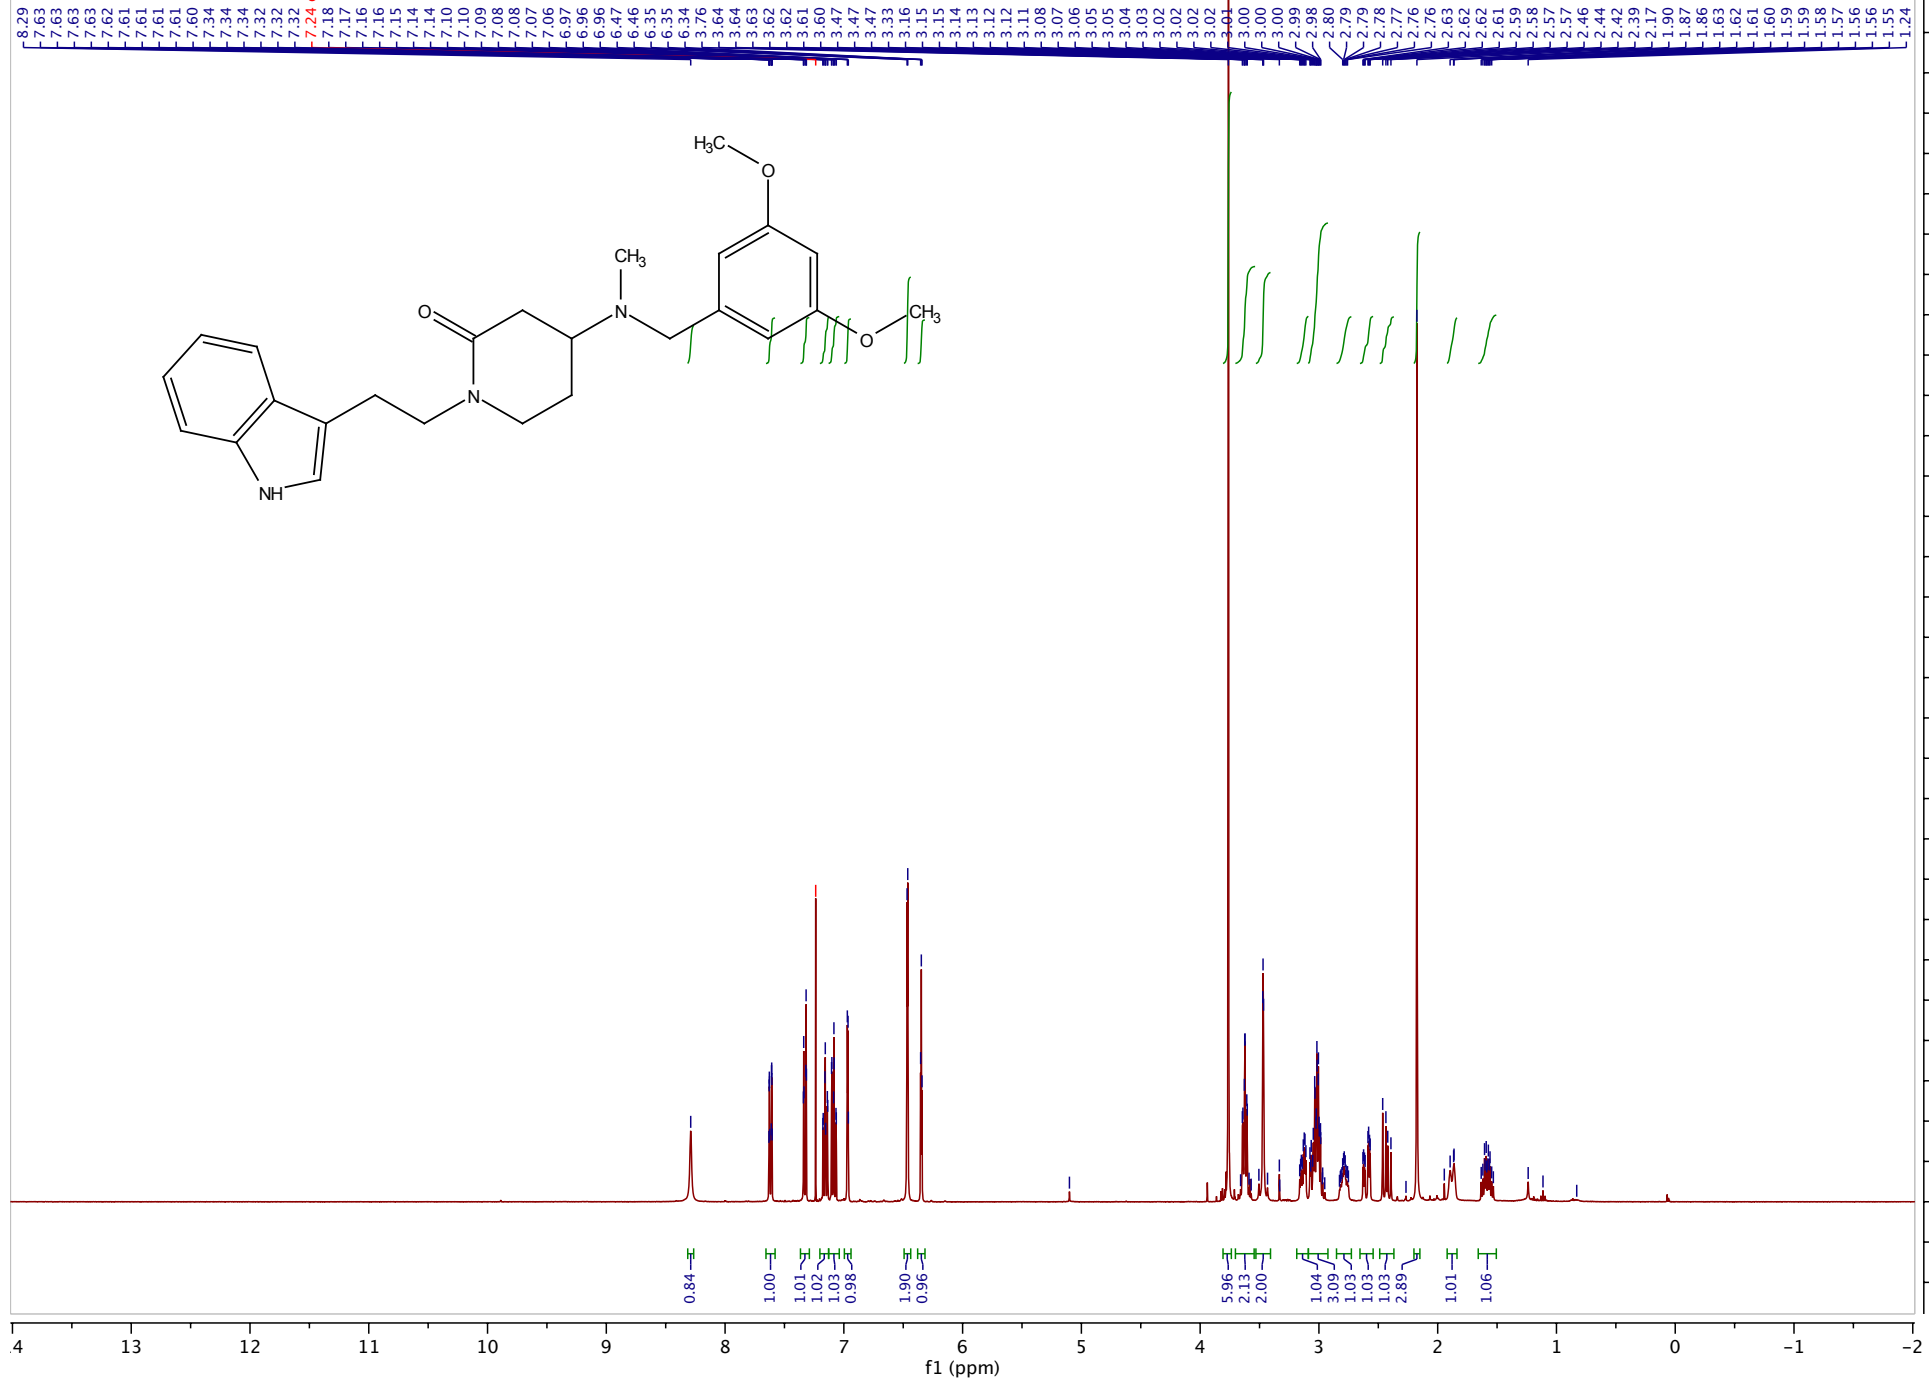

LL\_02\_153\_01

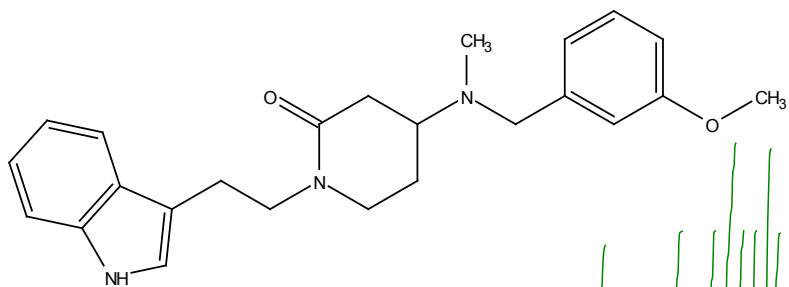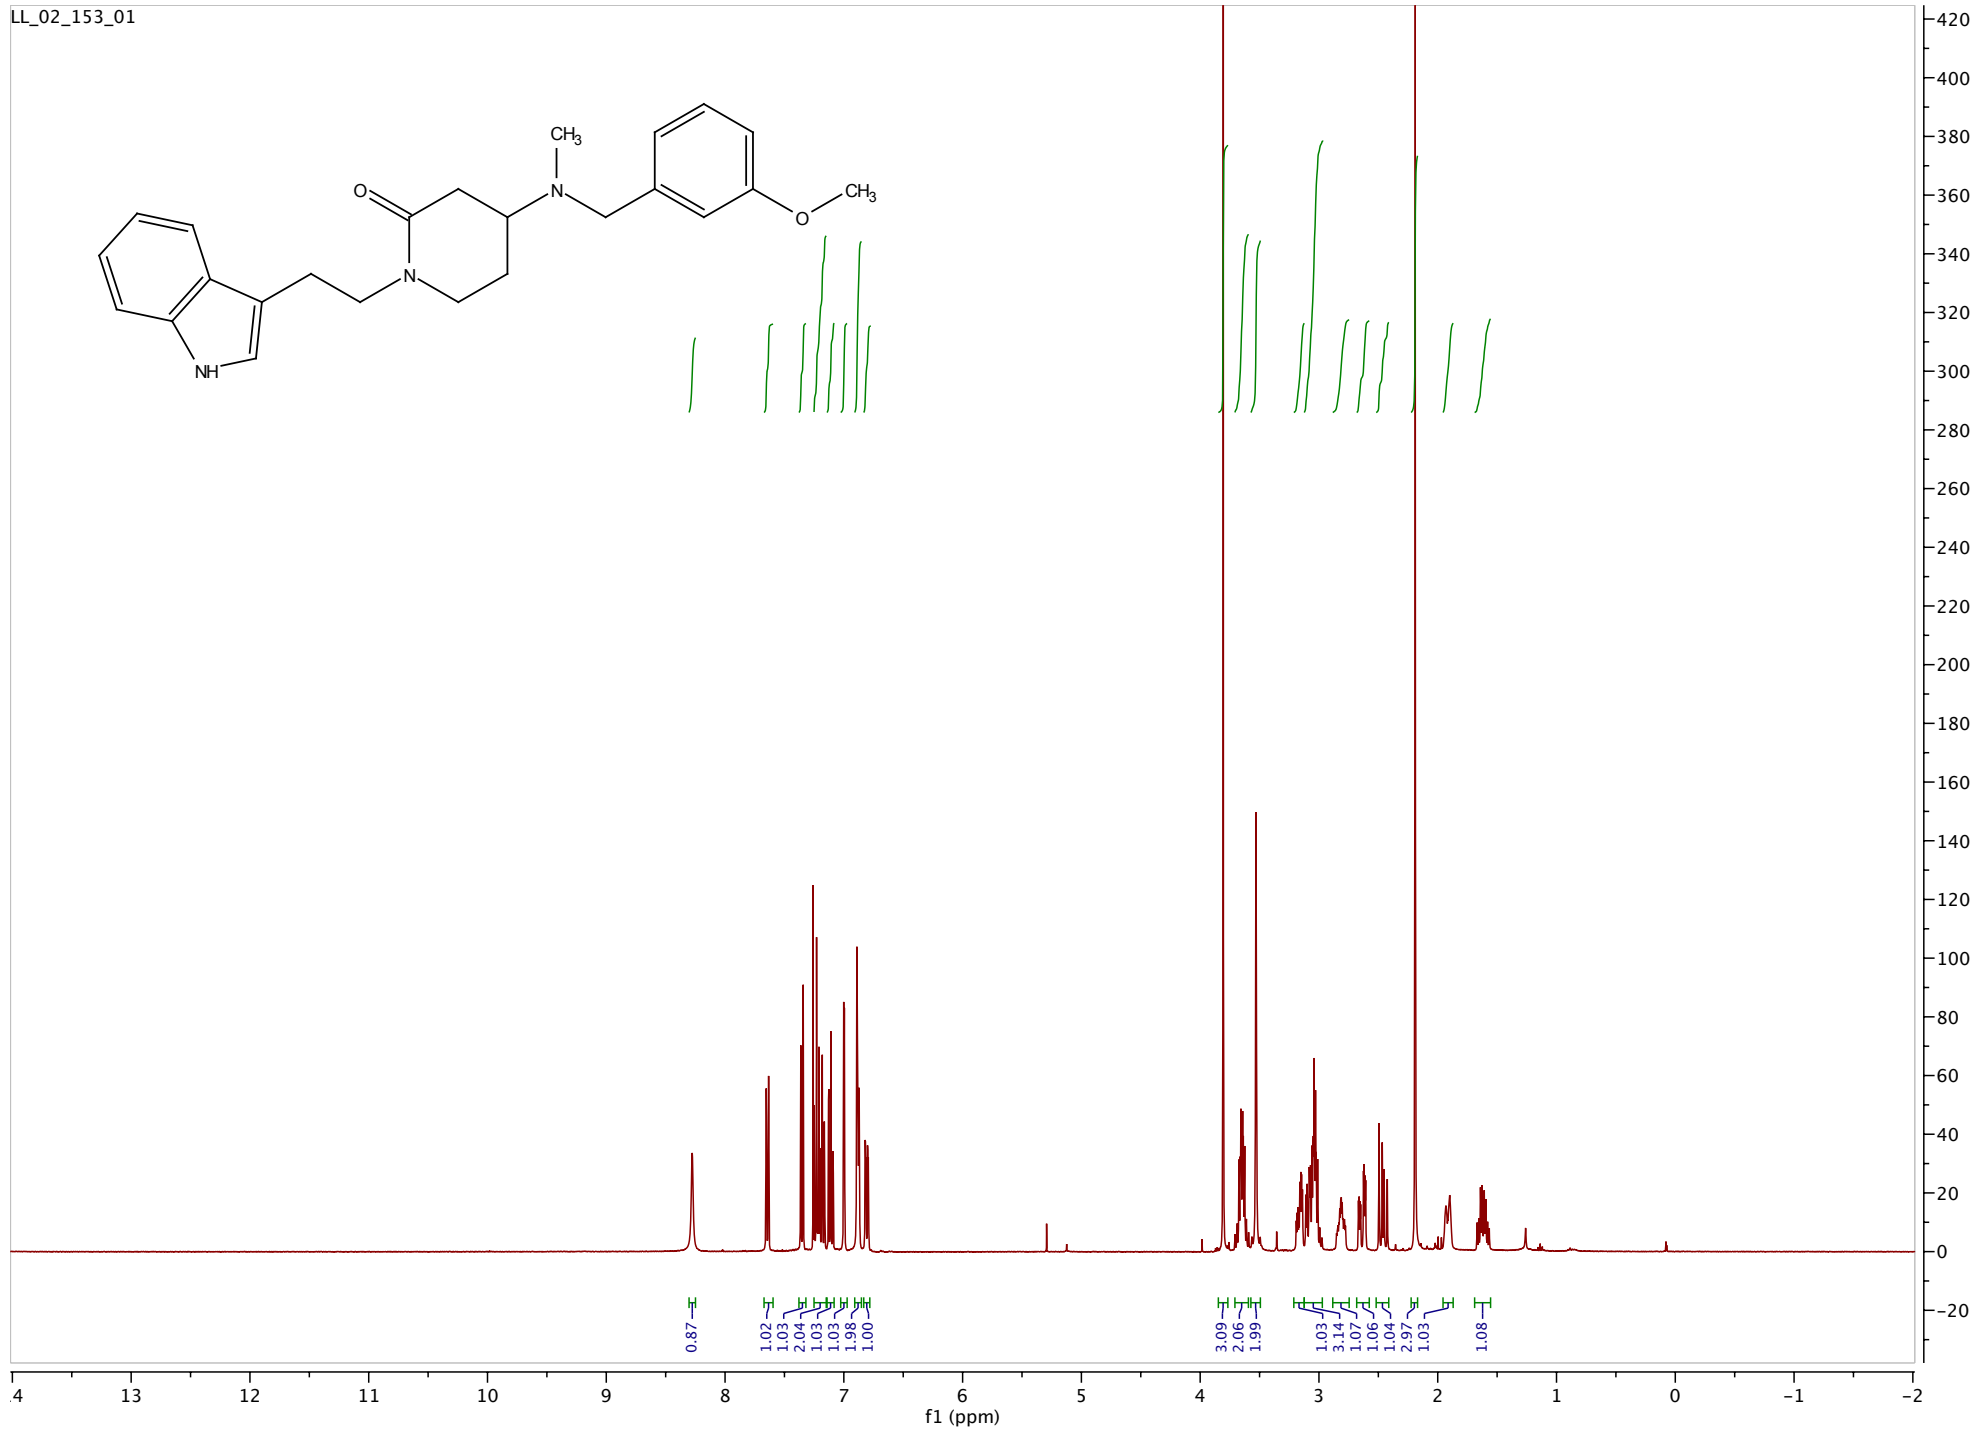



LL\_02\_153\_C13\_01

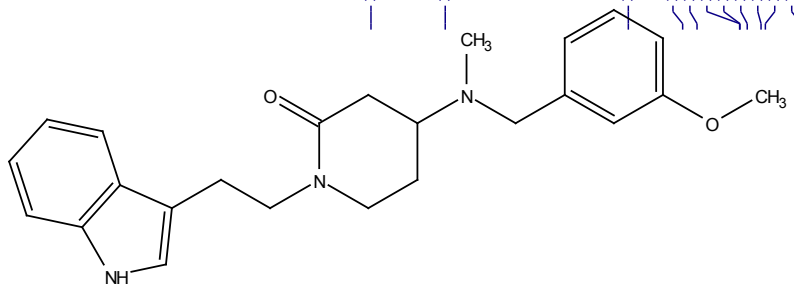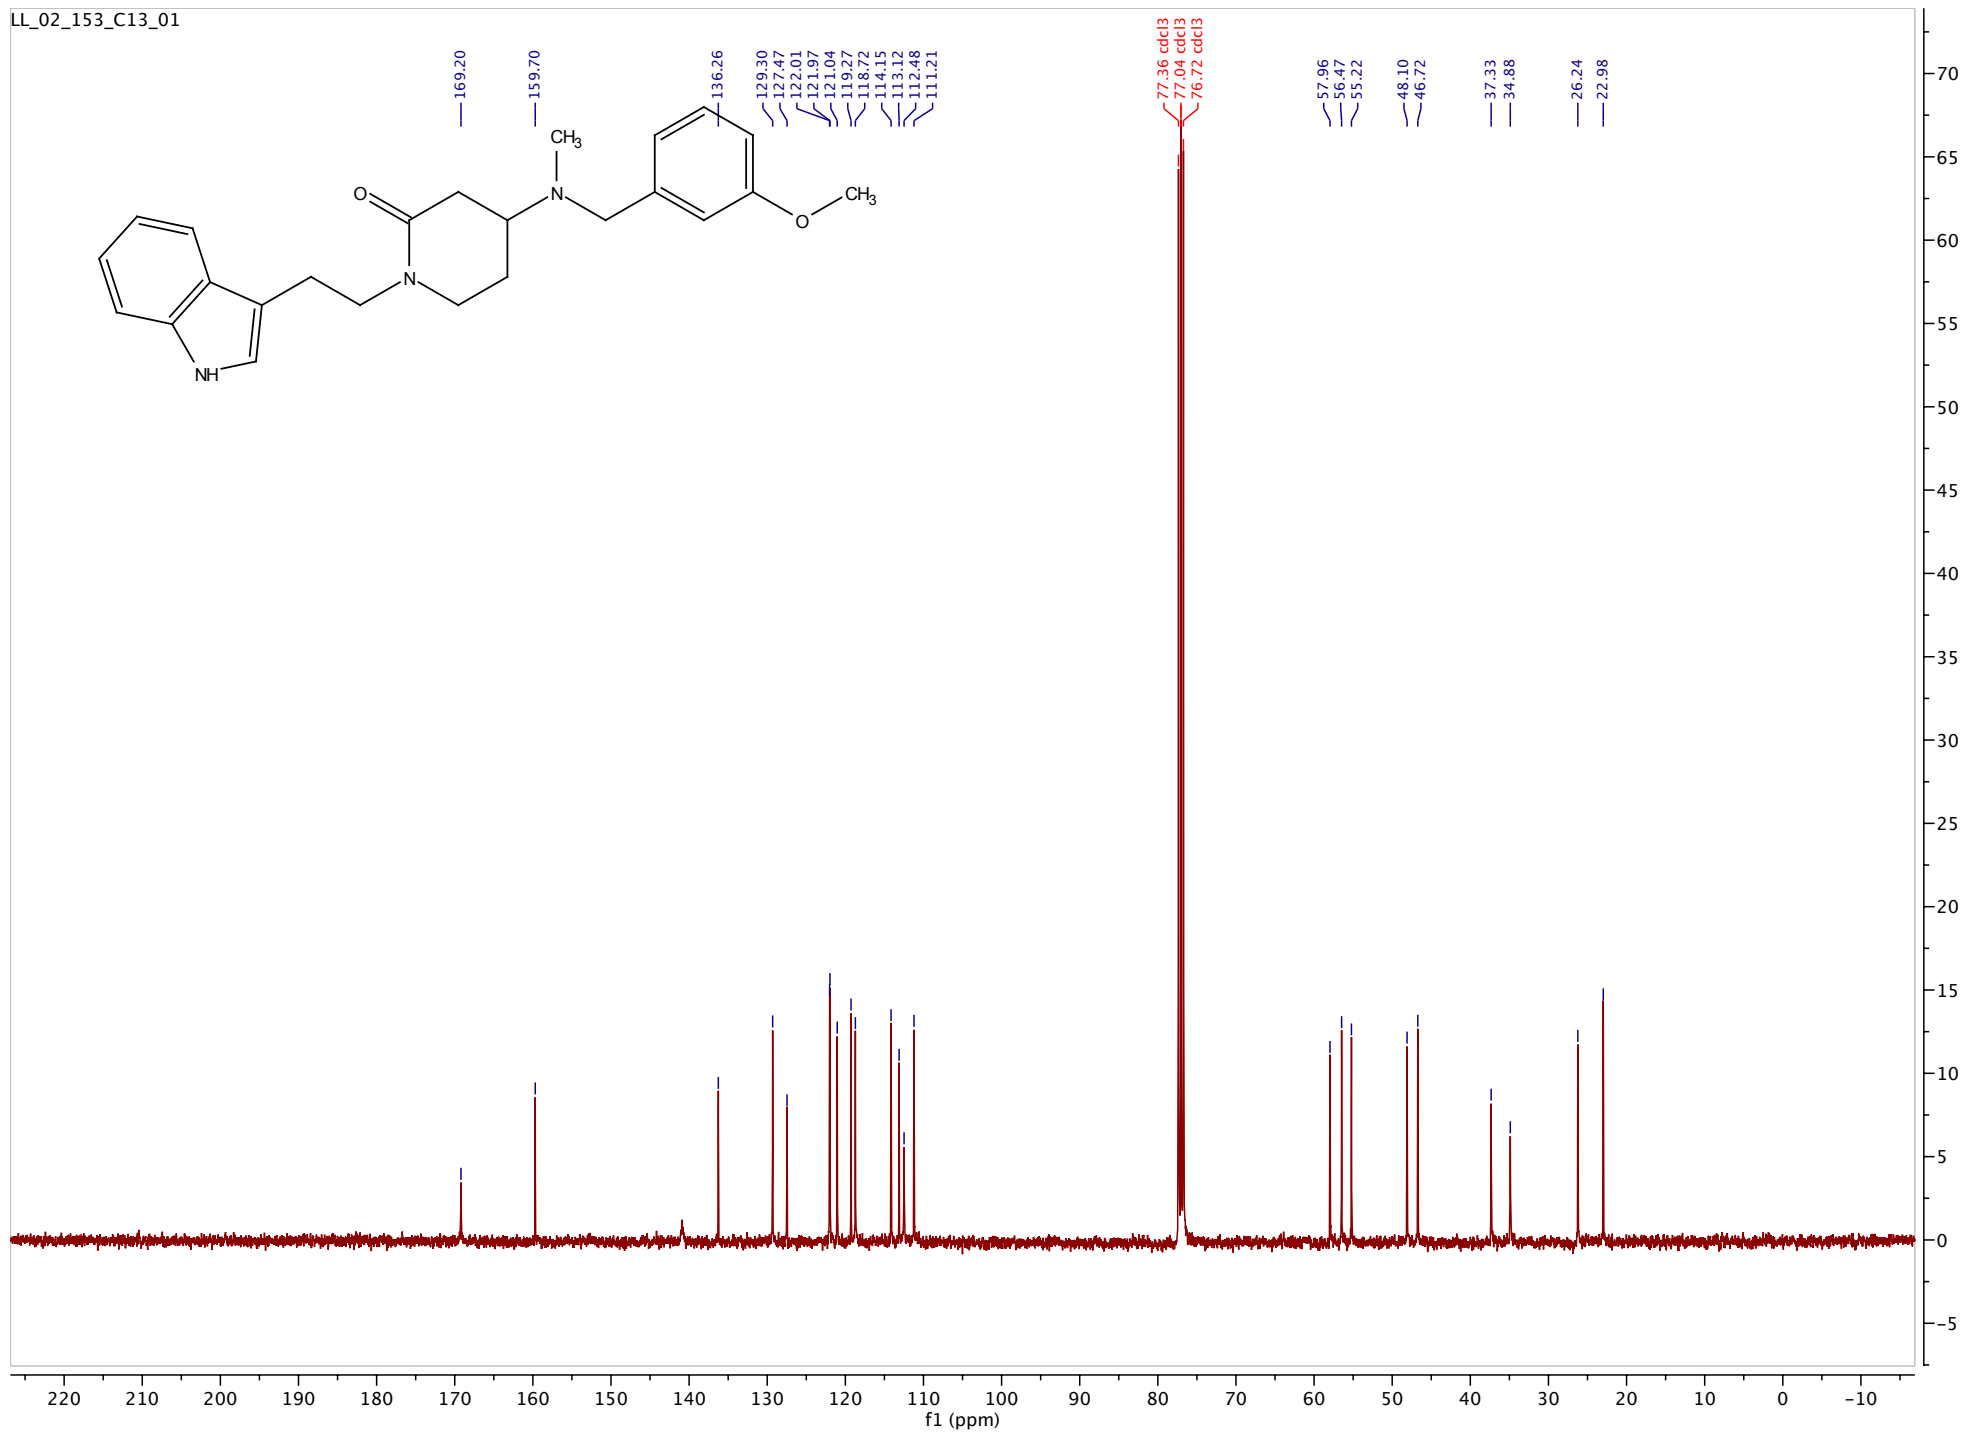

PROTON\_01  
LL\_02\_103\_purified

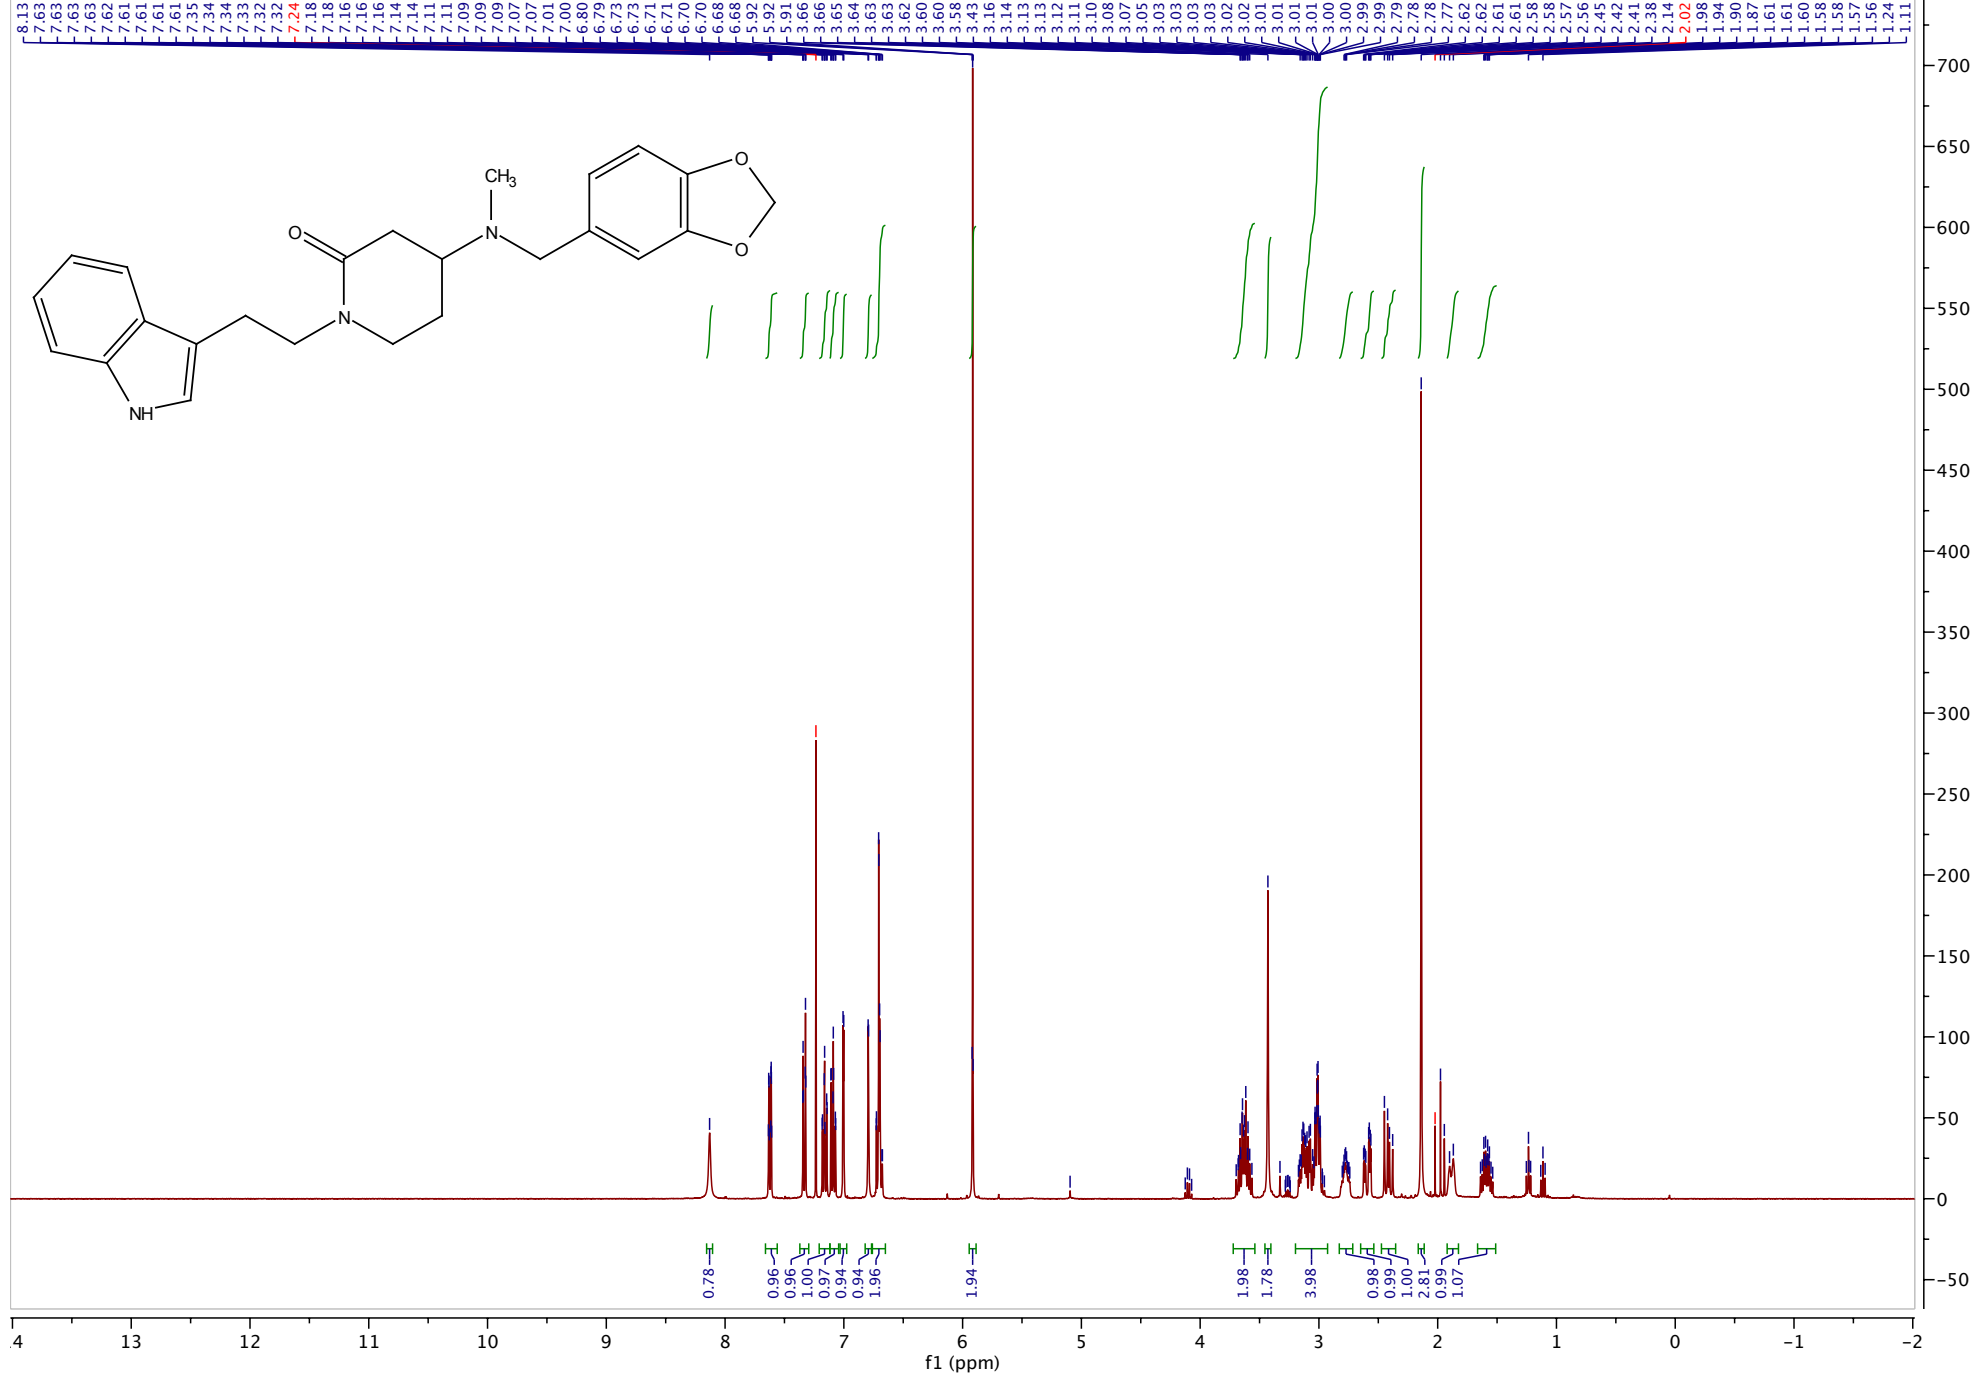

4 13 12 11 10 9 8 7 6 5 4 3 2 1 0 -1 -2

f1 (ppm)

LL\_02\_103\_repurified\_C13\_01

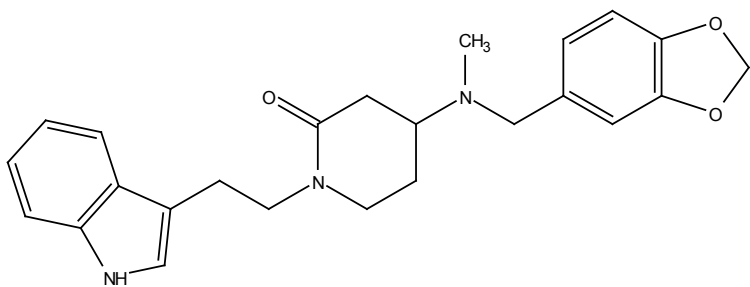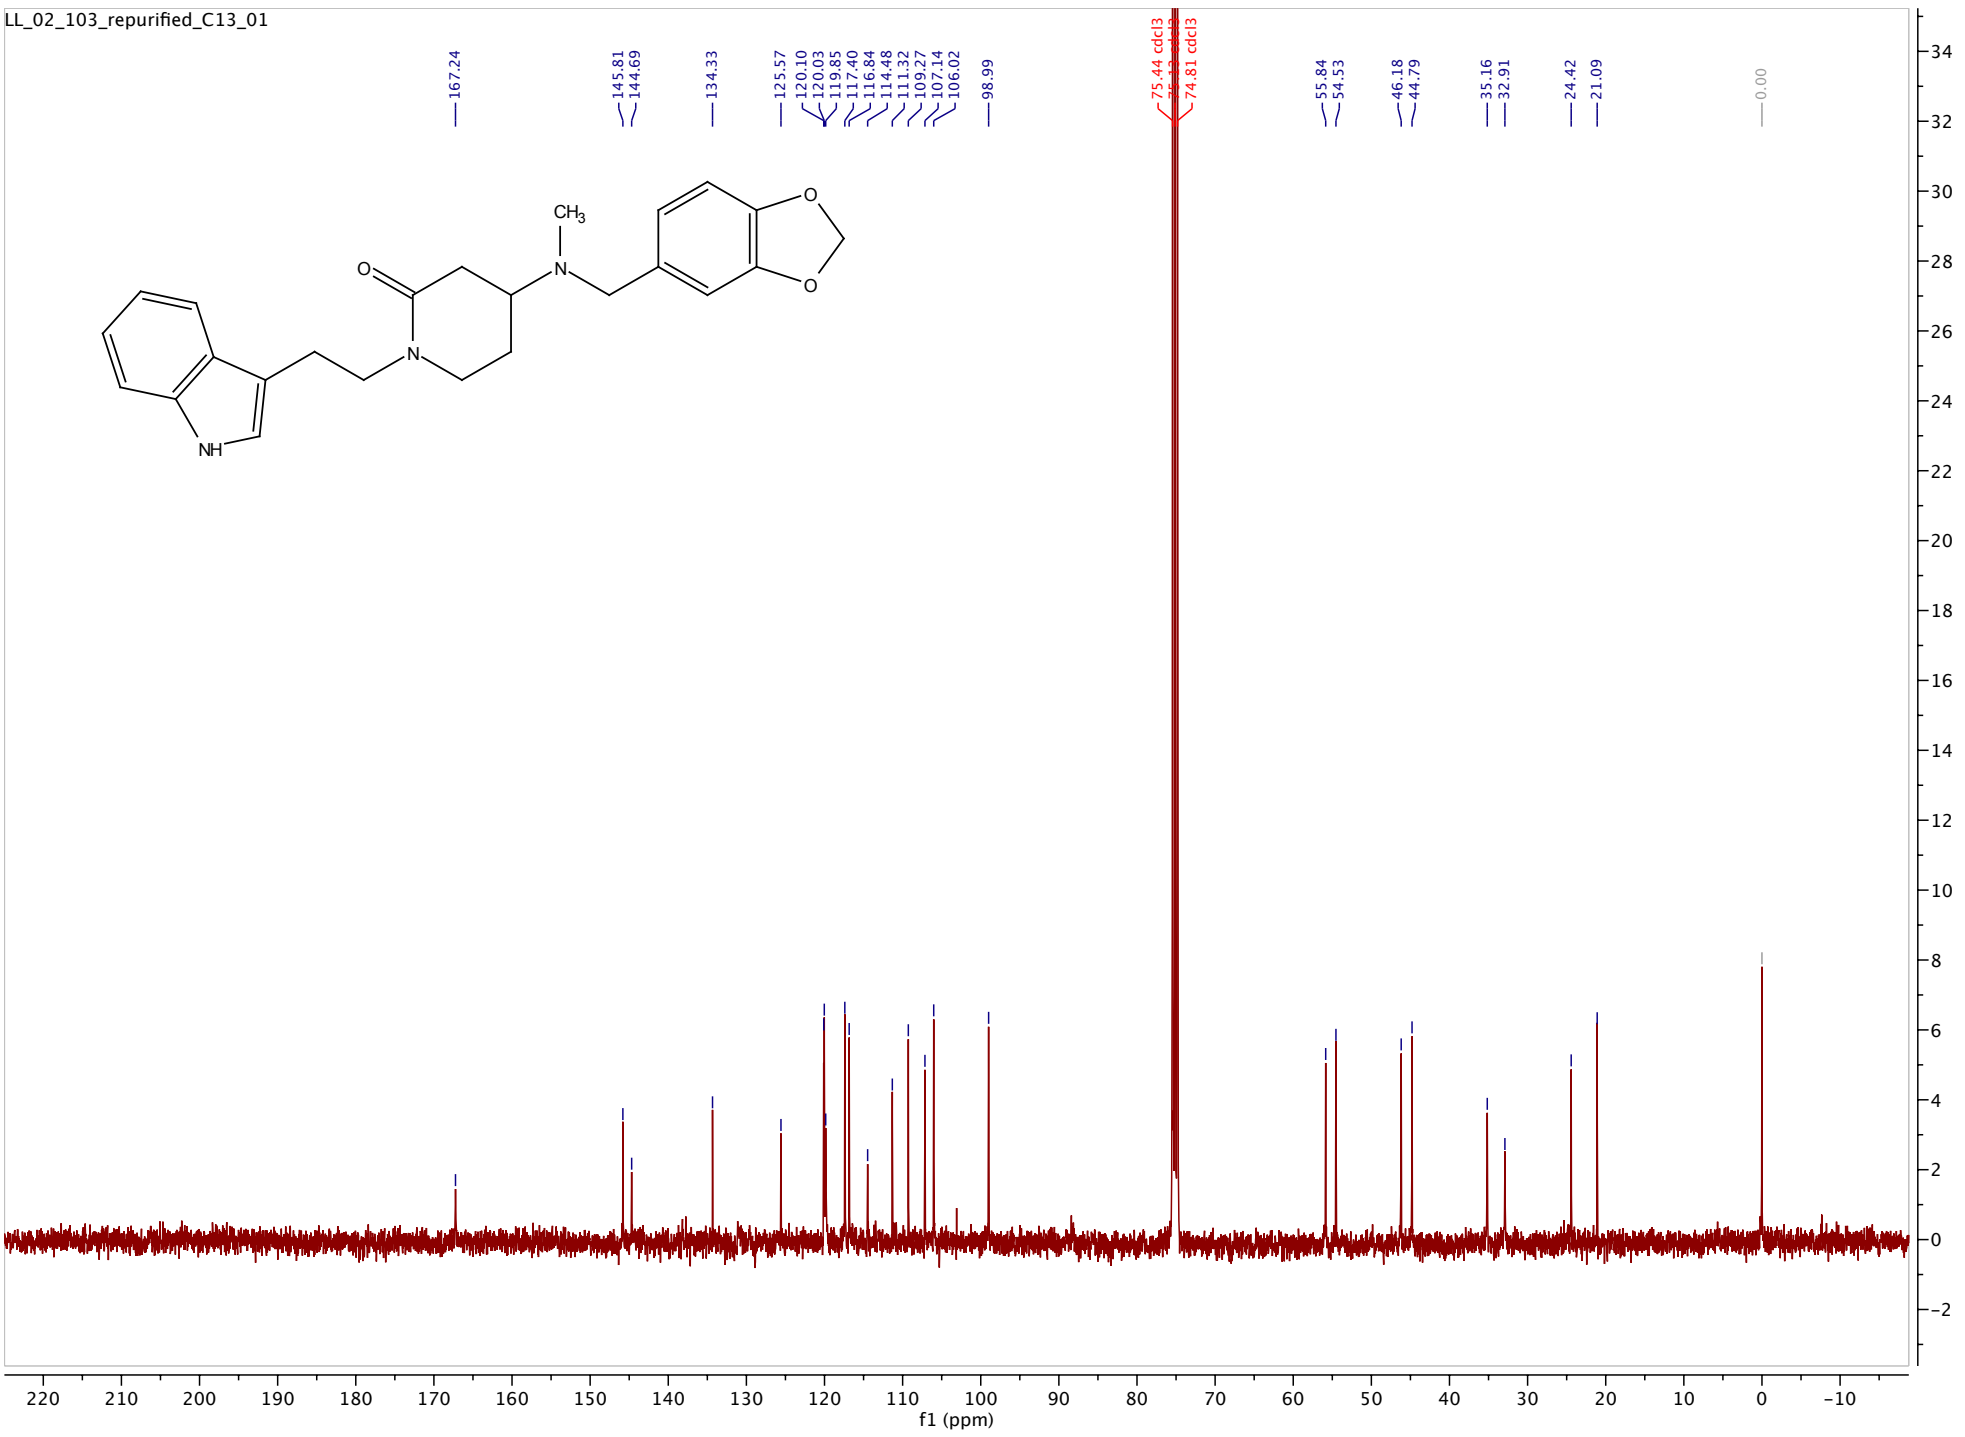

PROTON\_01  
LL\_02\_157

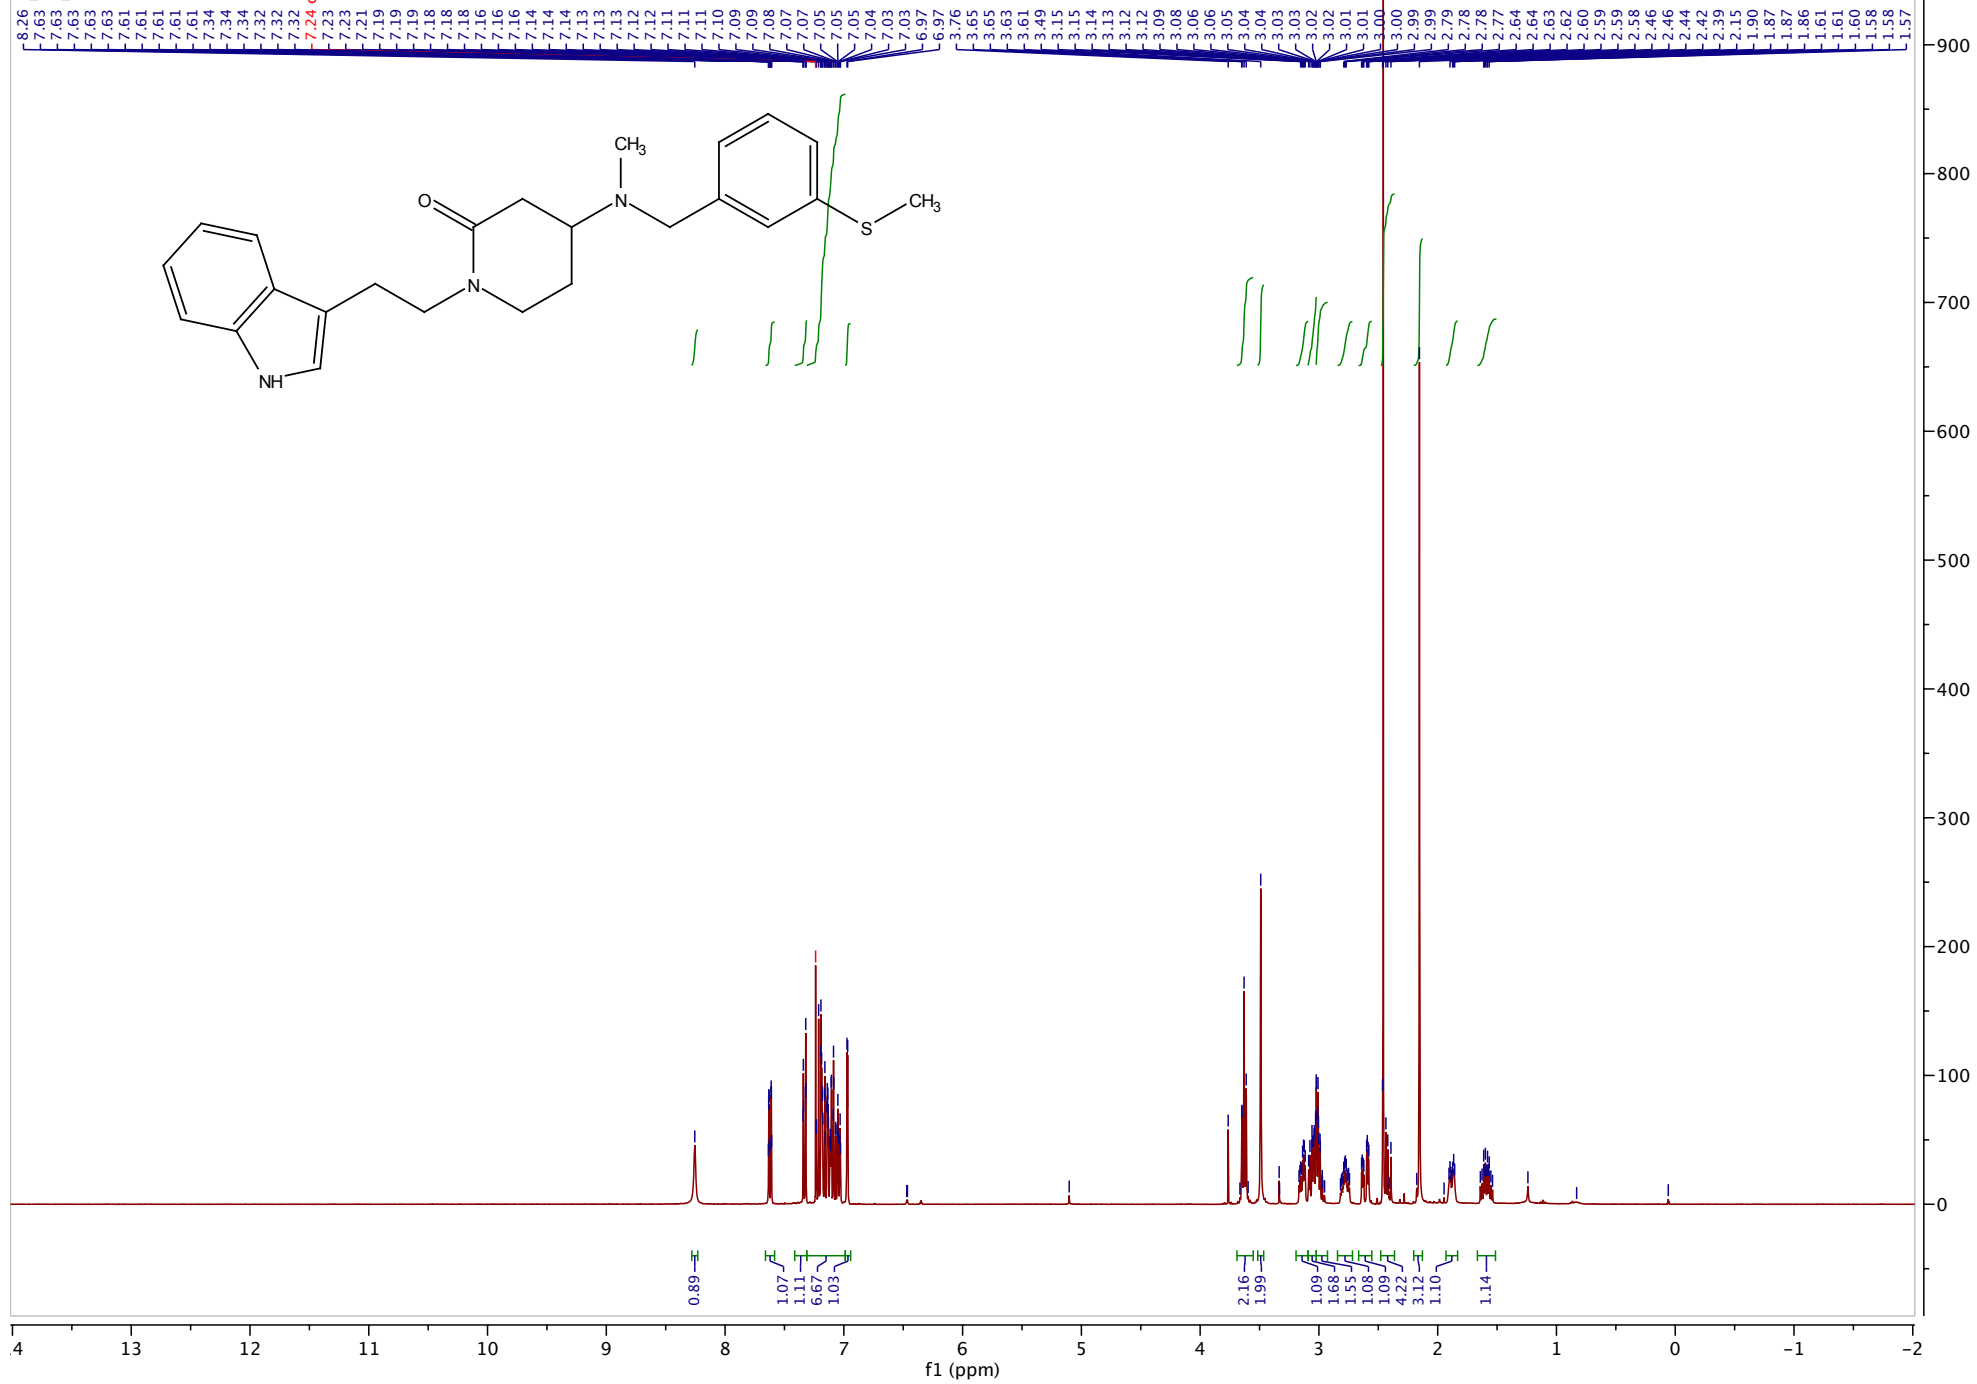

CARBON\_01  
LL\_02\_157\_C13

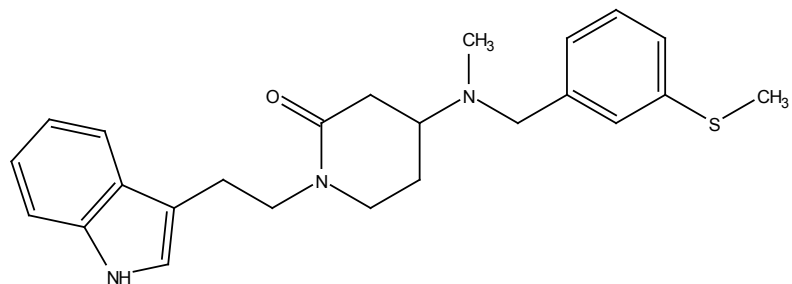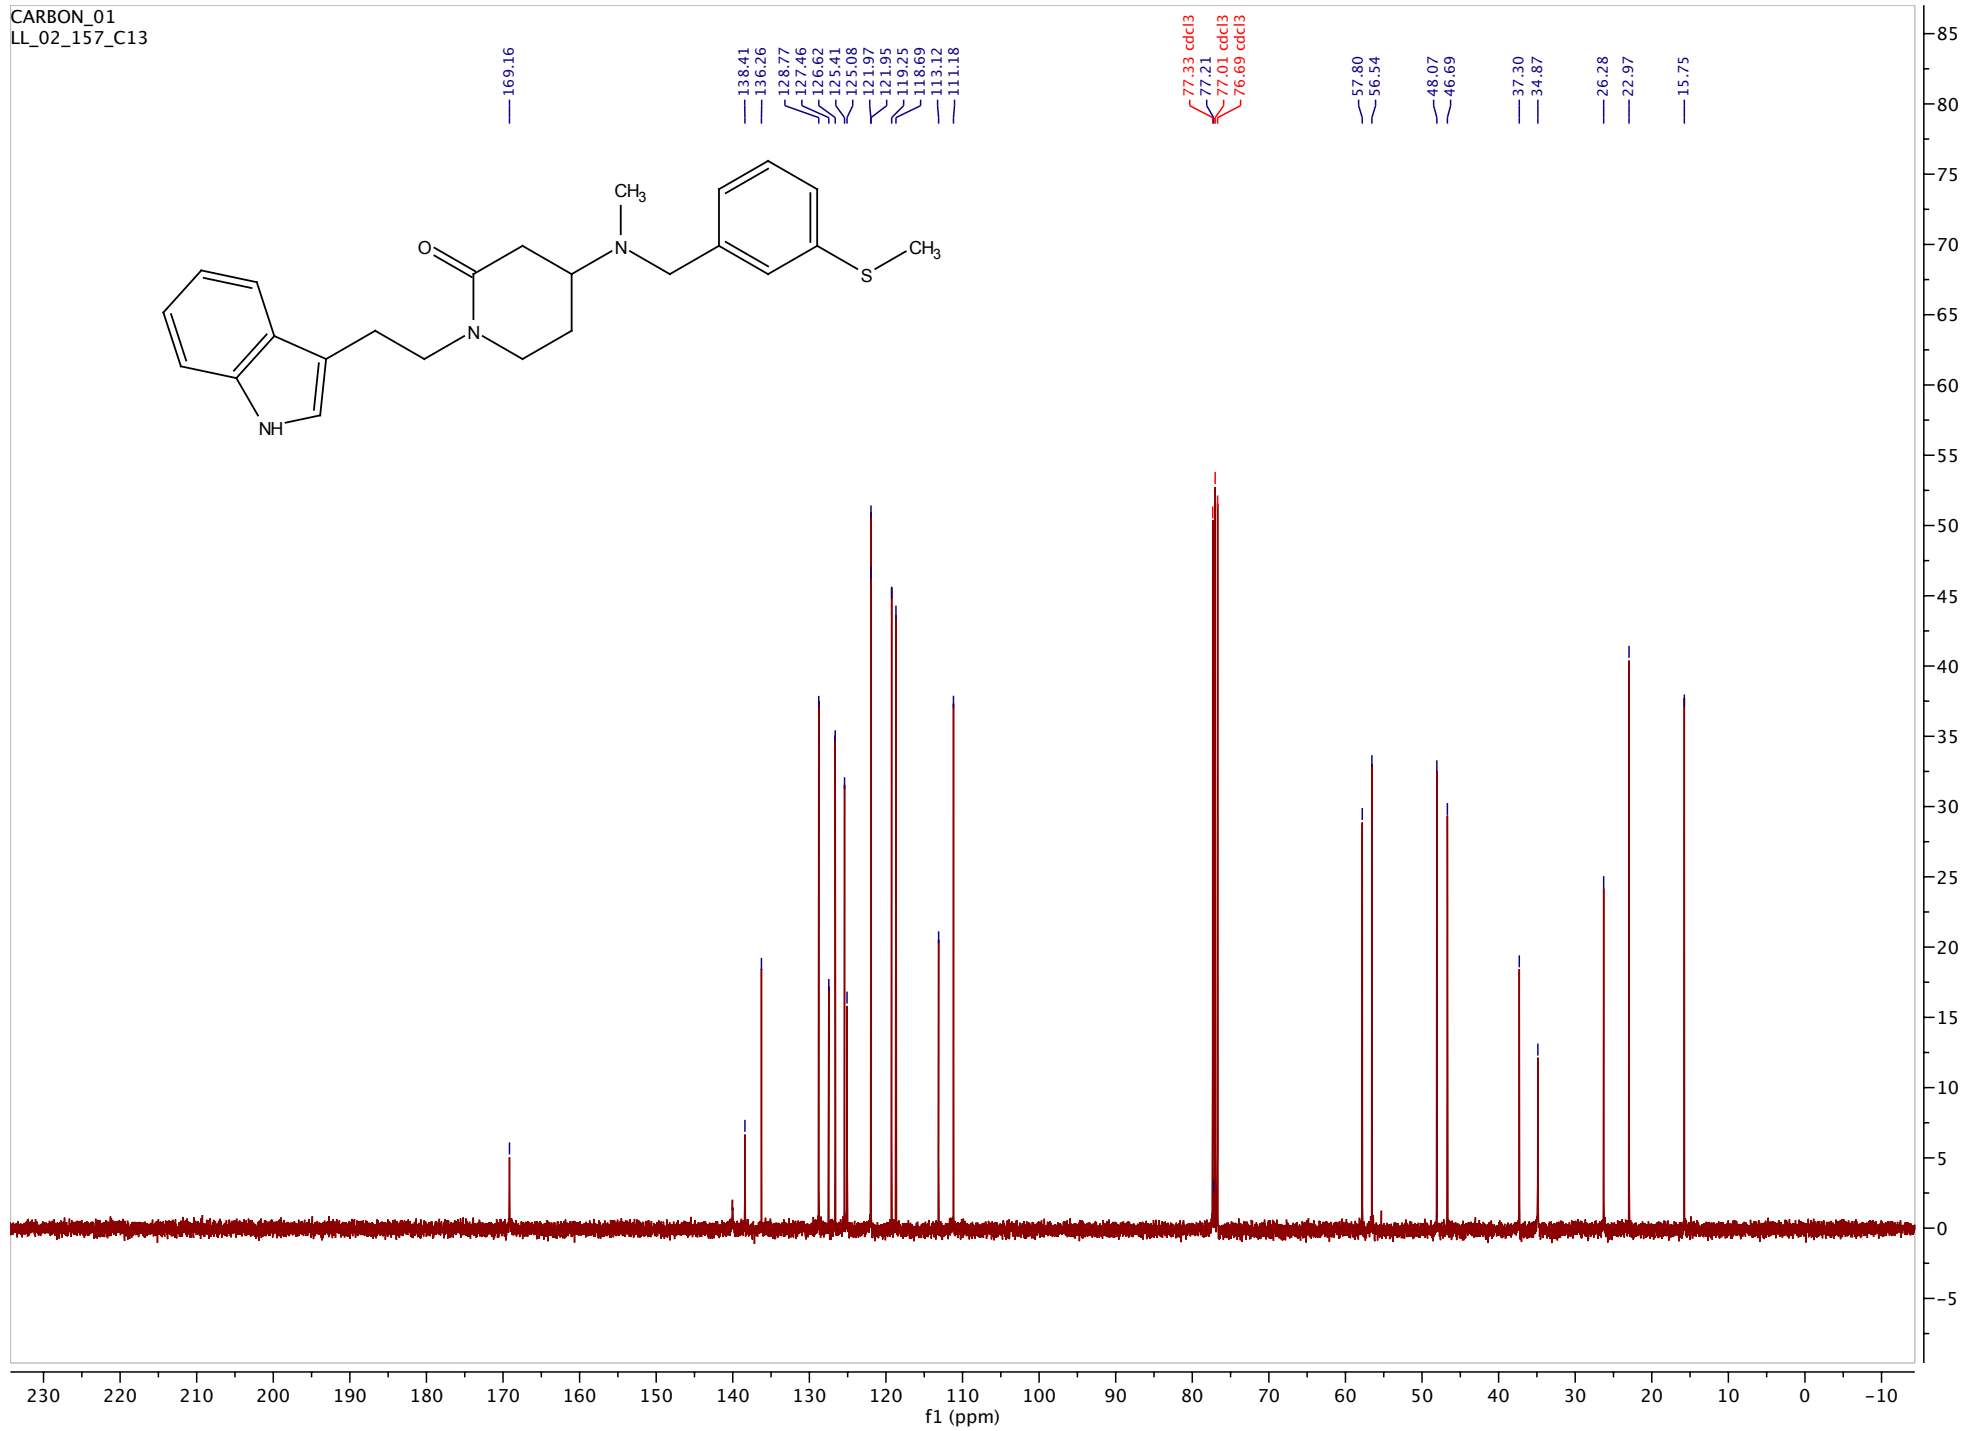

LL\_02\_144\_01

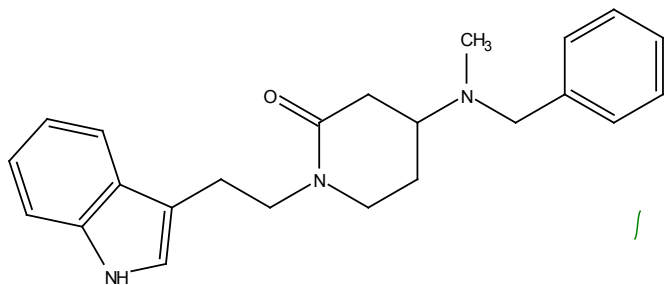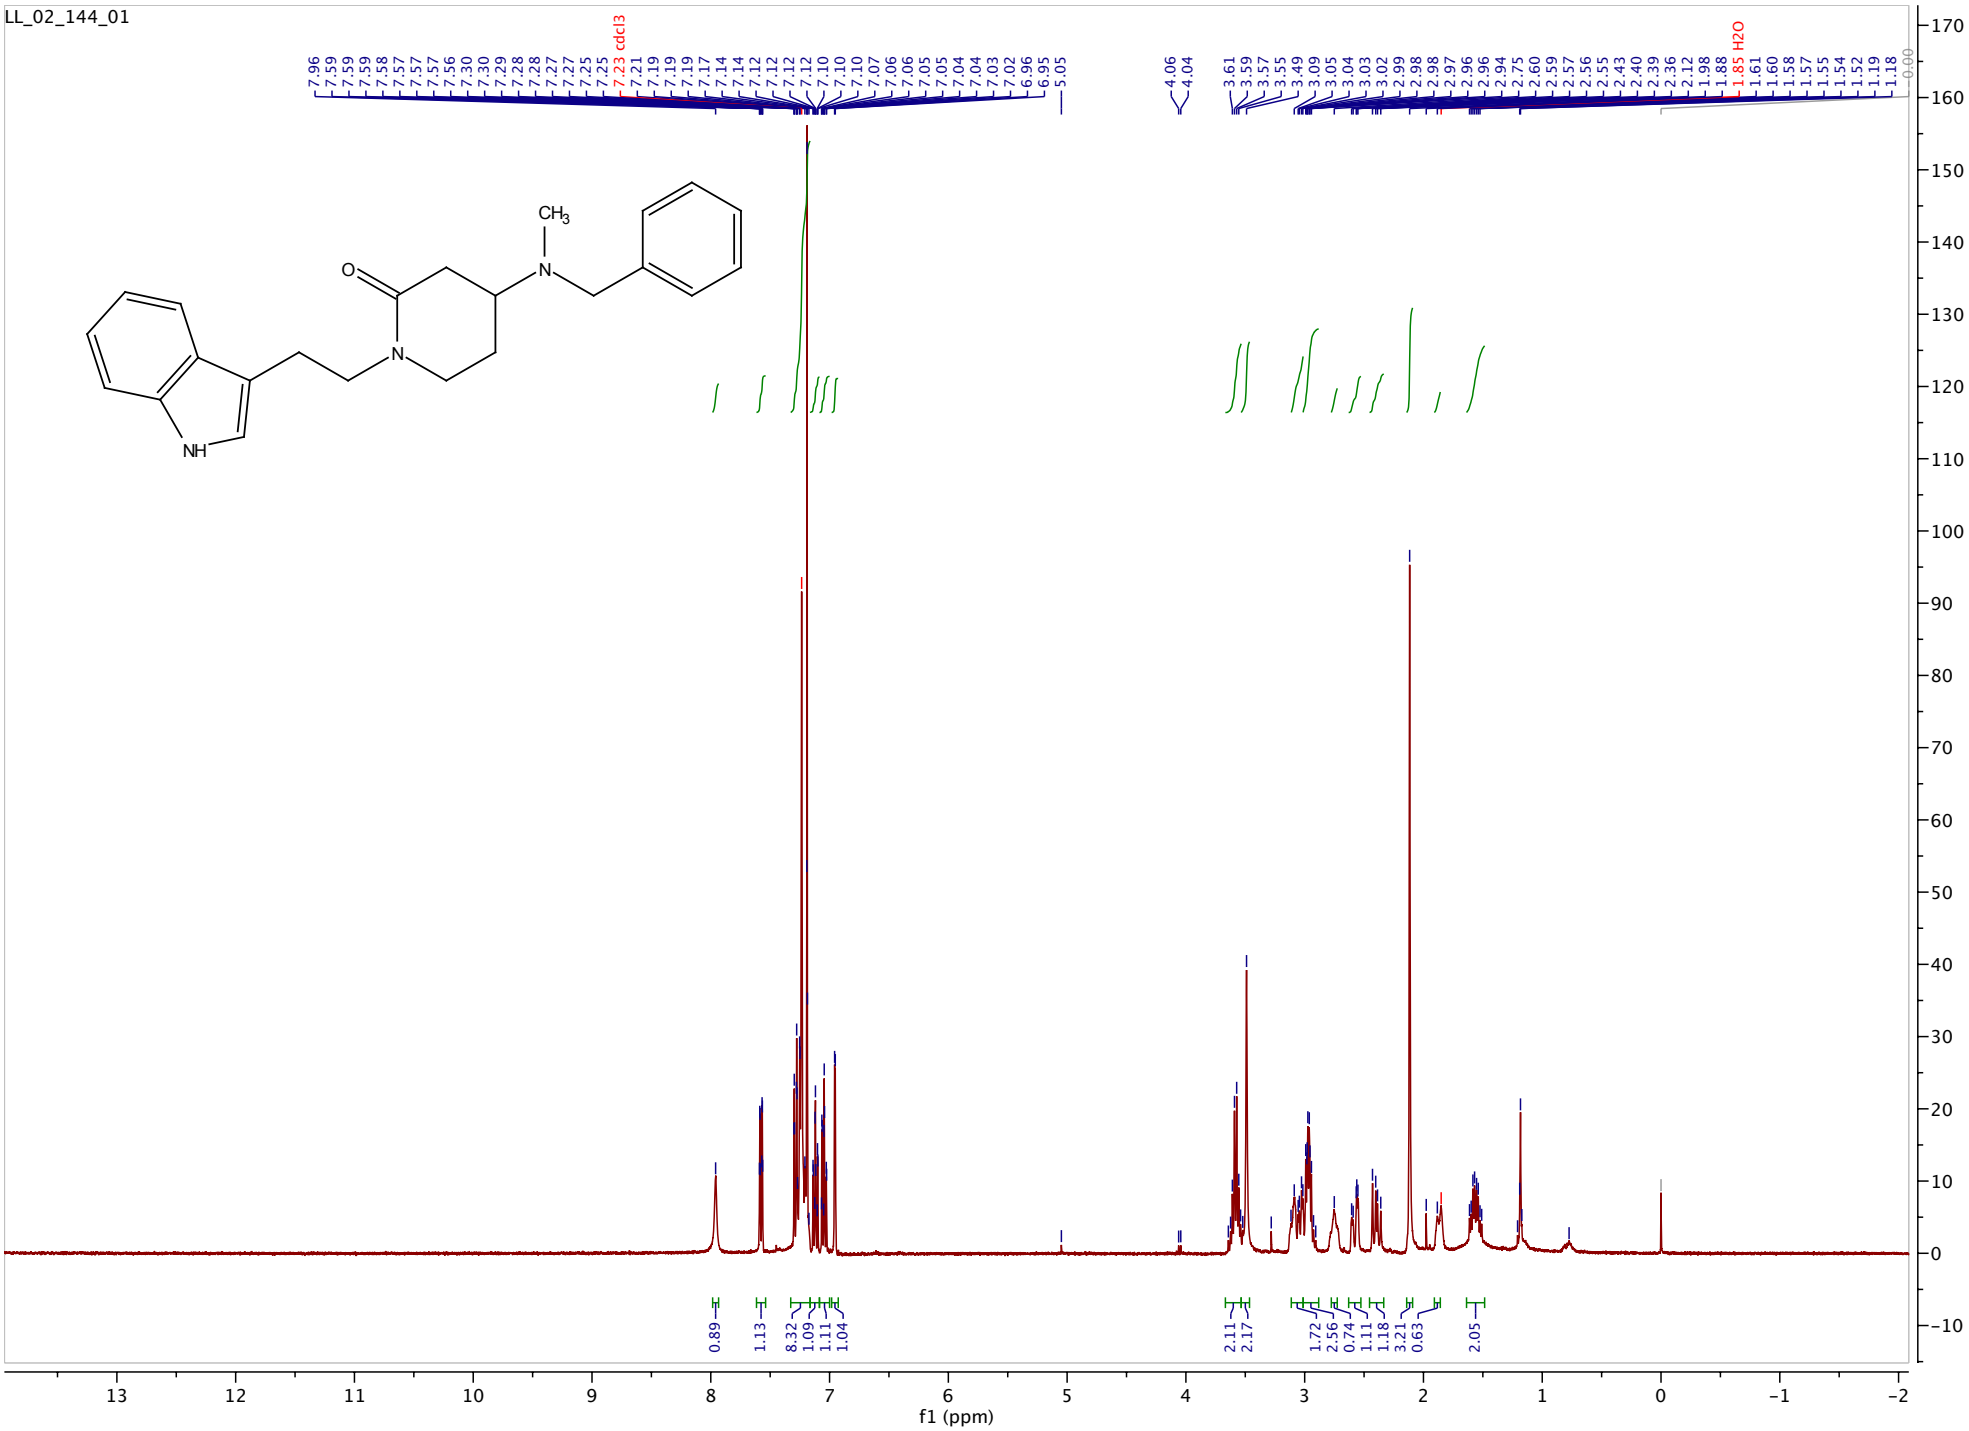

LL\_02\_144\_C13\_01

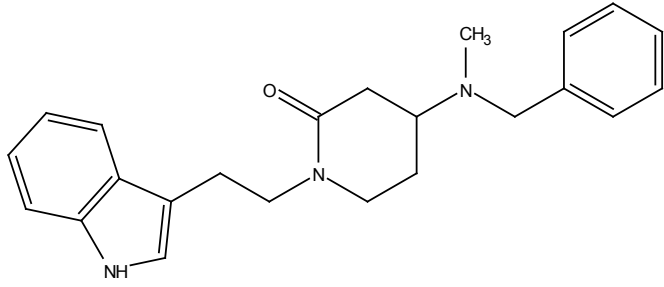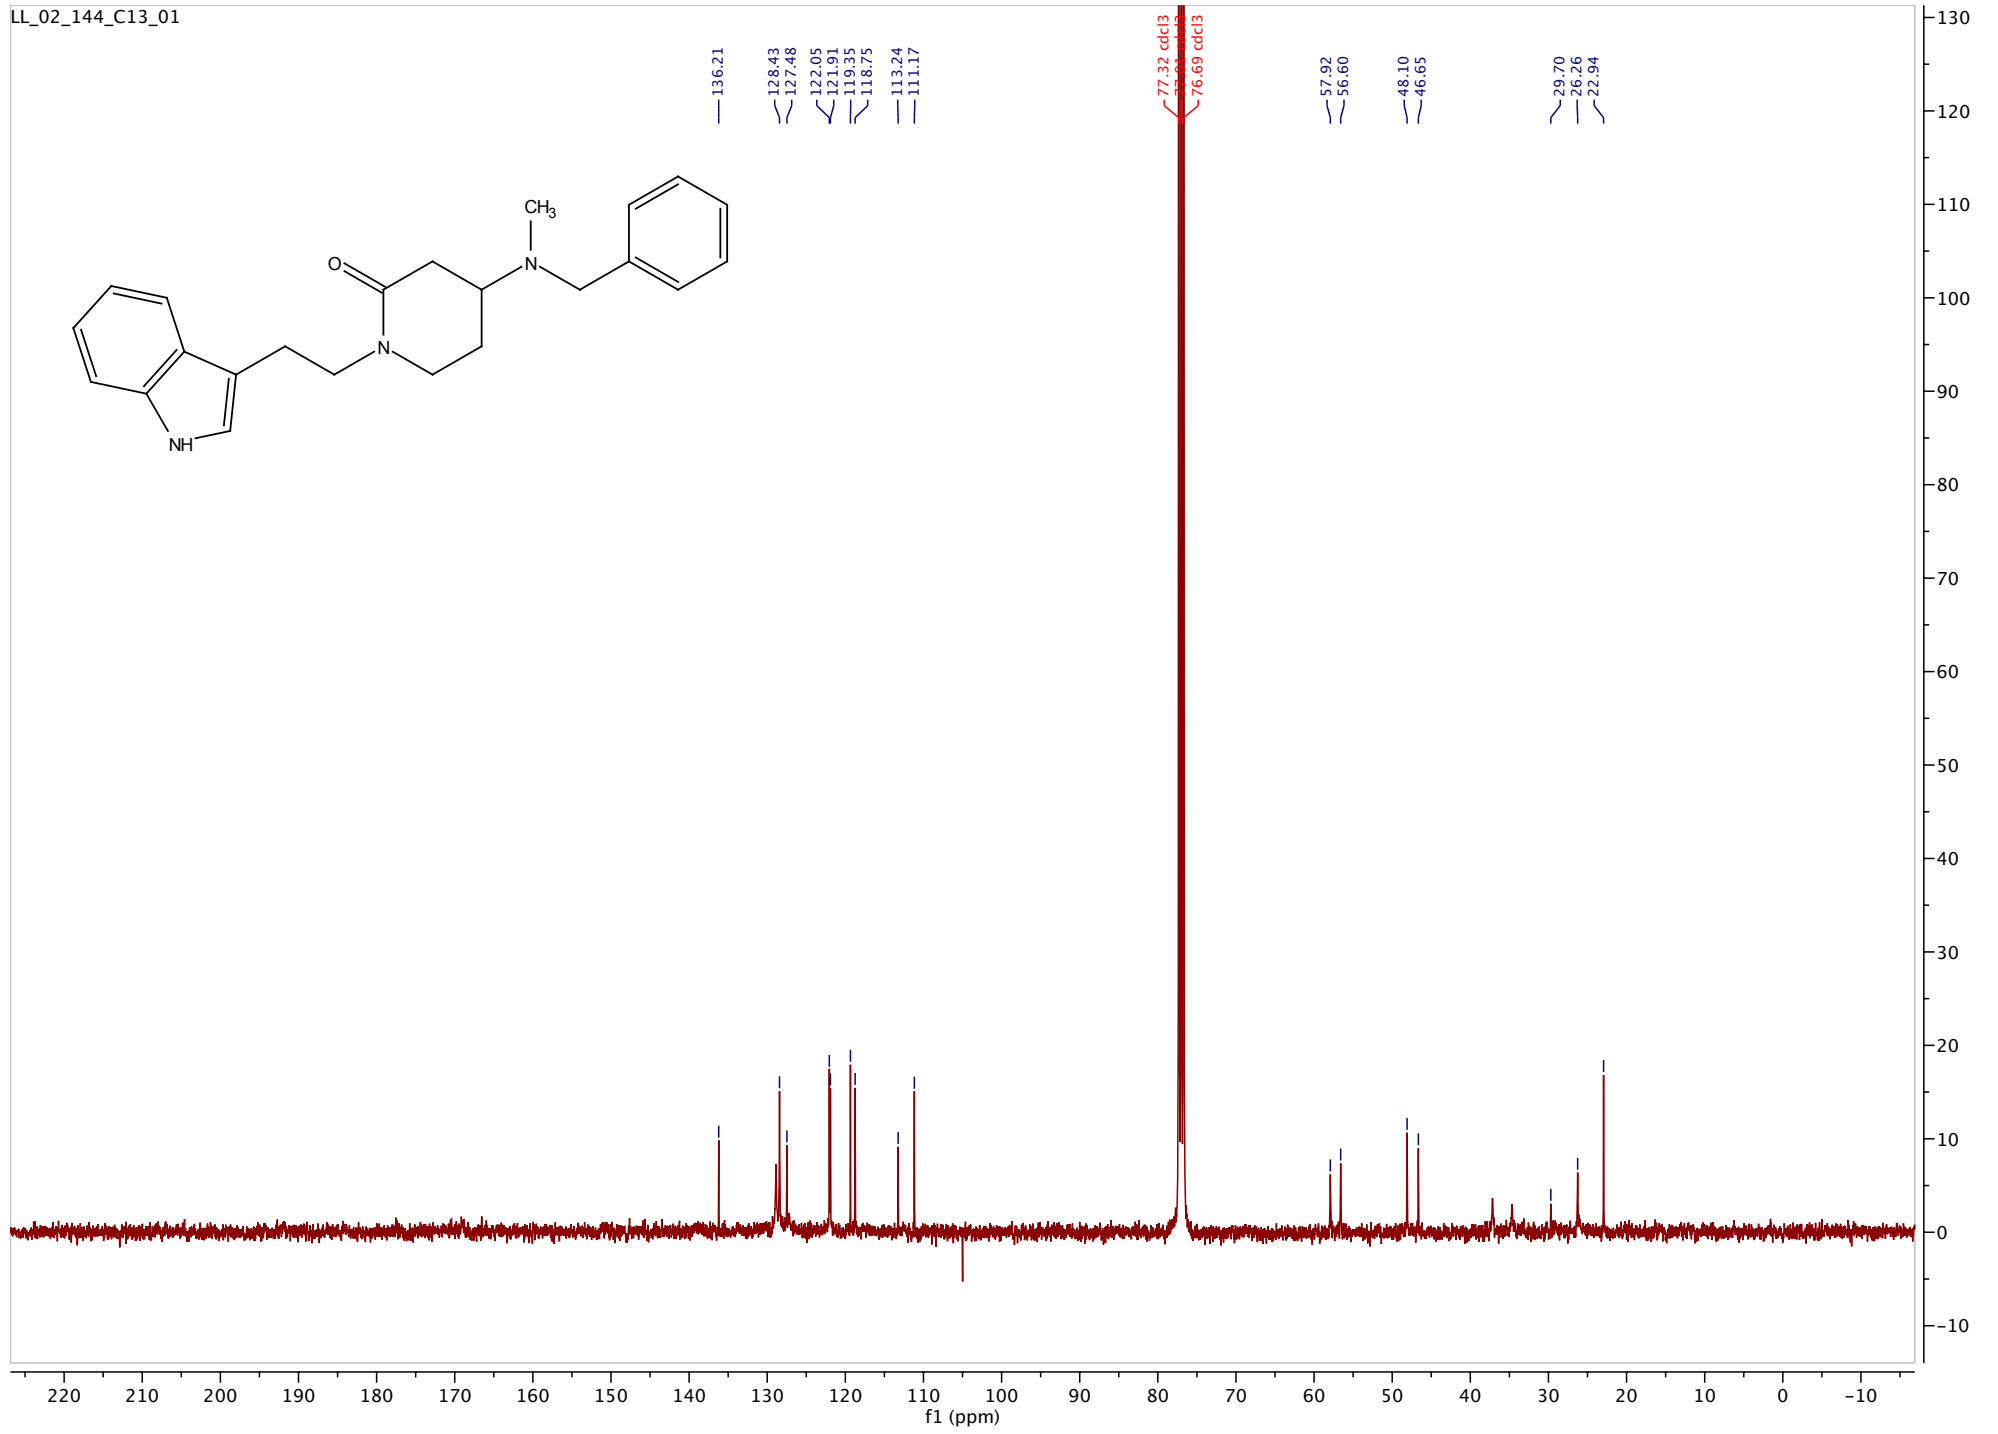

LTL02269\_column  
STANDARD 1H OBSERVE

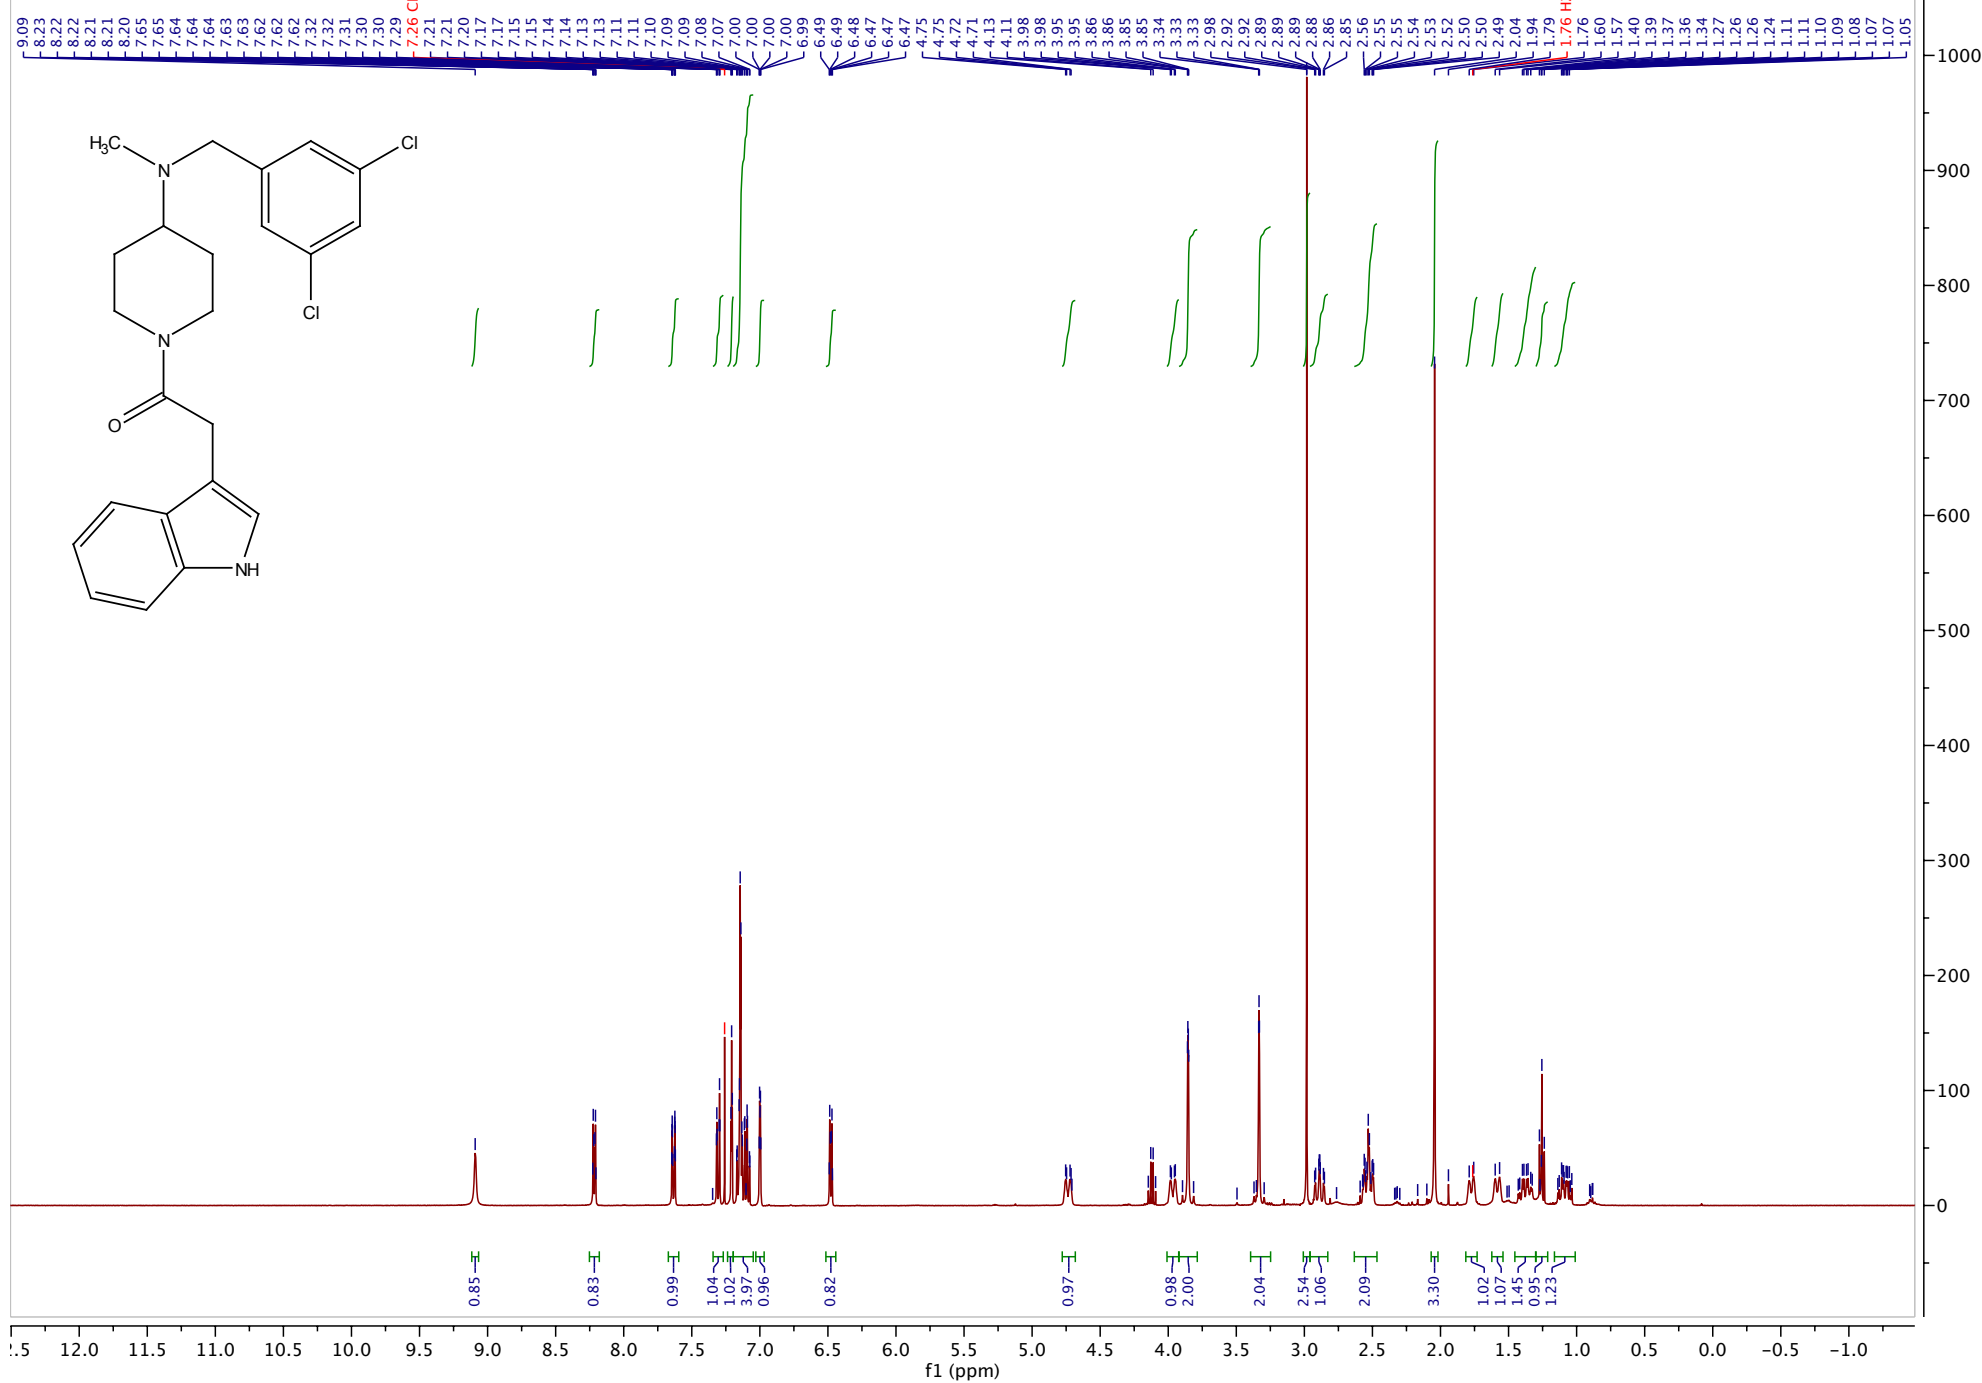



LTL03048  
STANDARD 1H OBSERVE

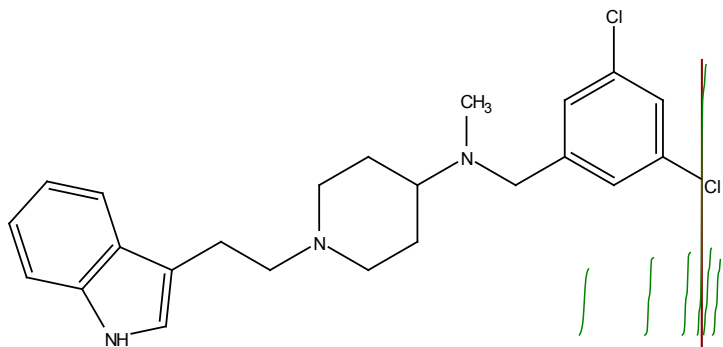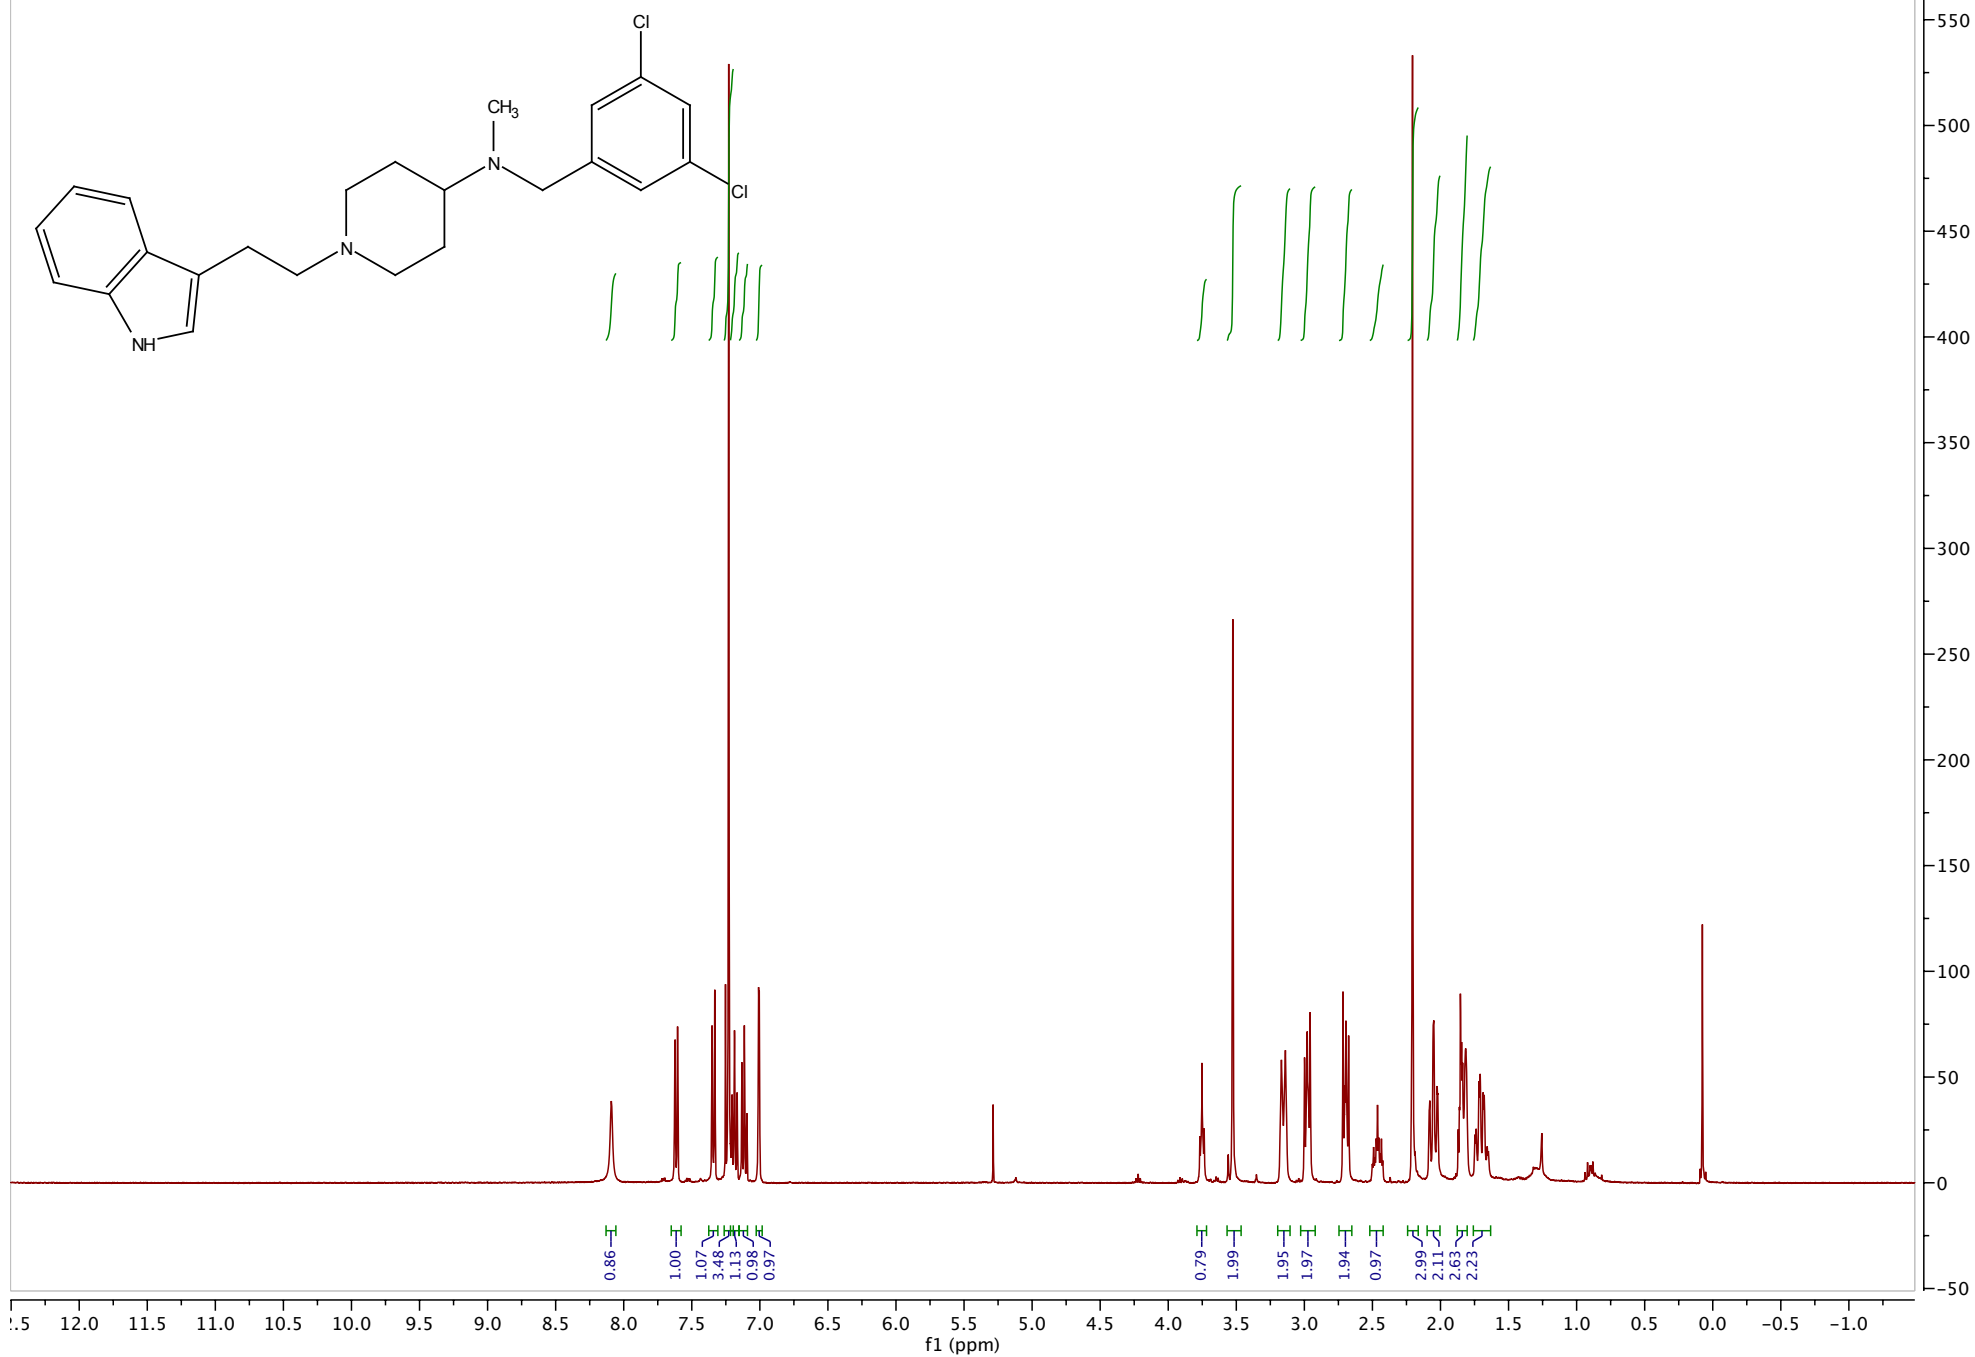

CARBON\_01  
LTL03048c13

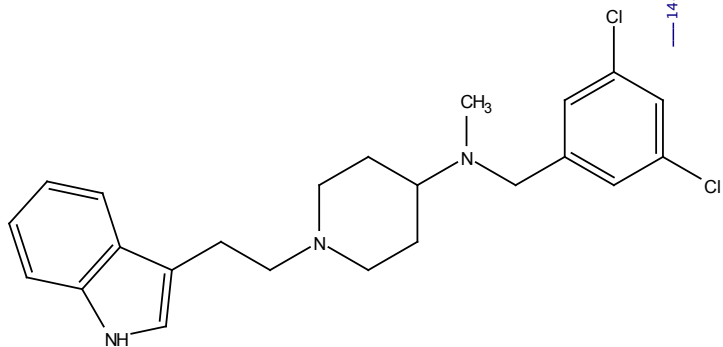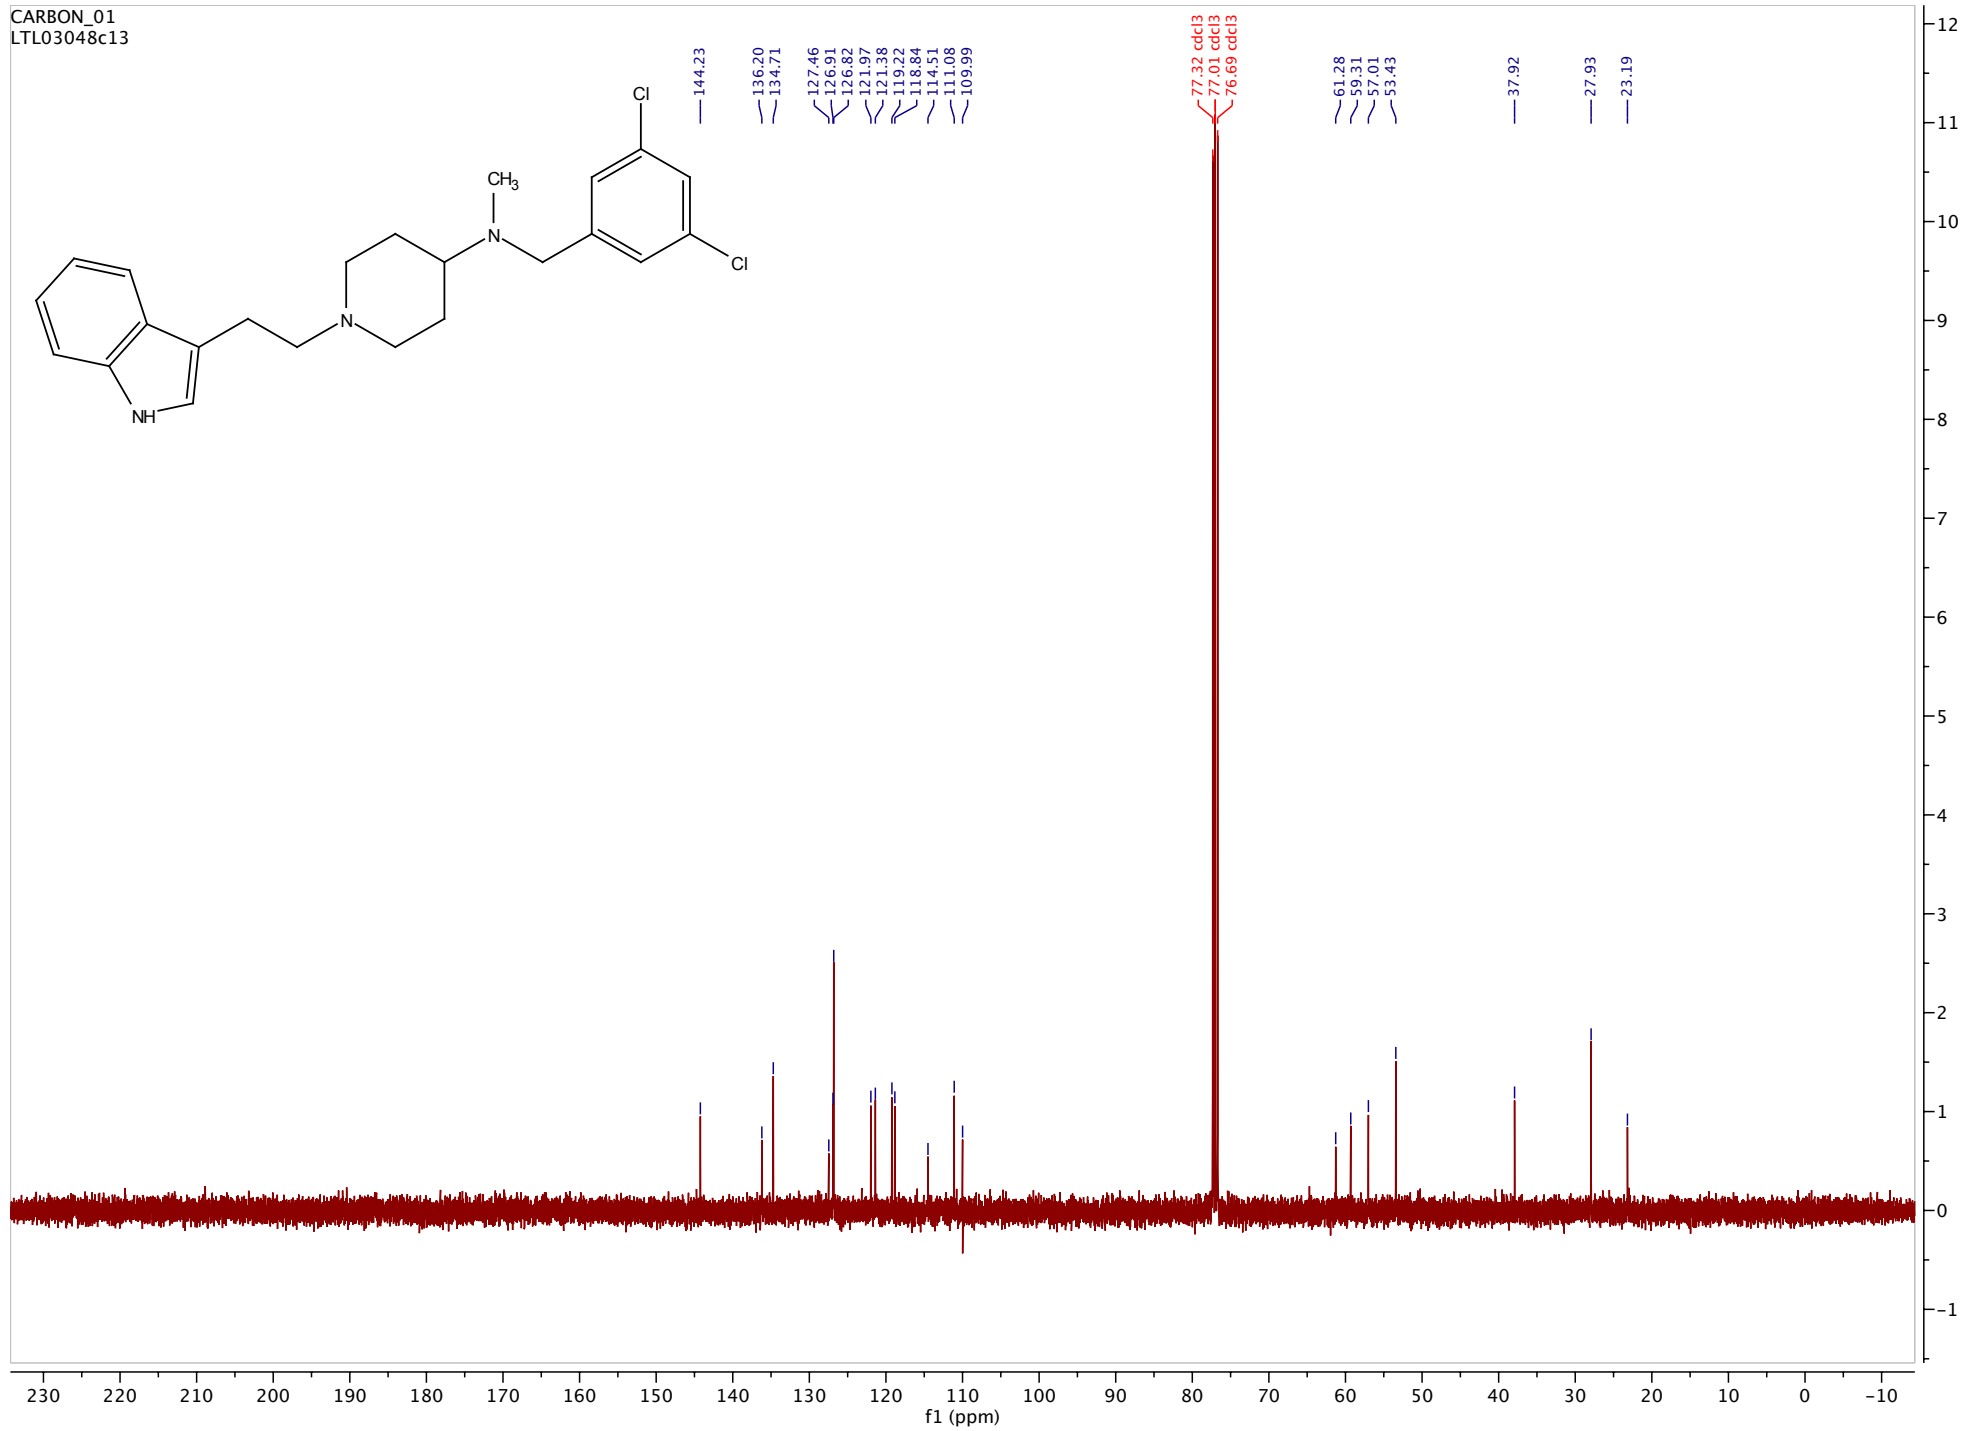

PROTON\_01  
LTL03165\_protoncarbon

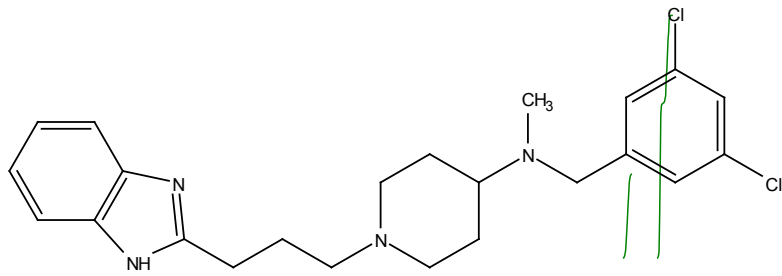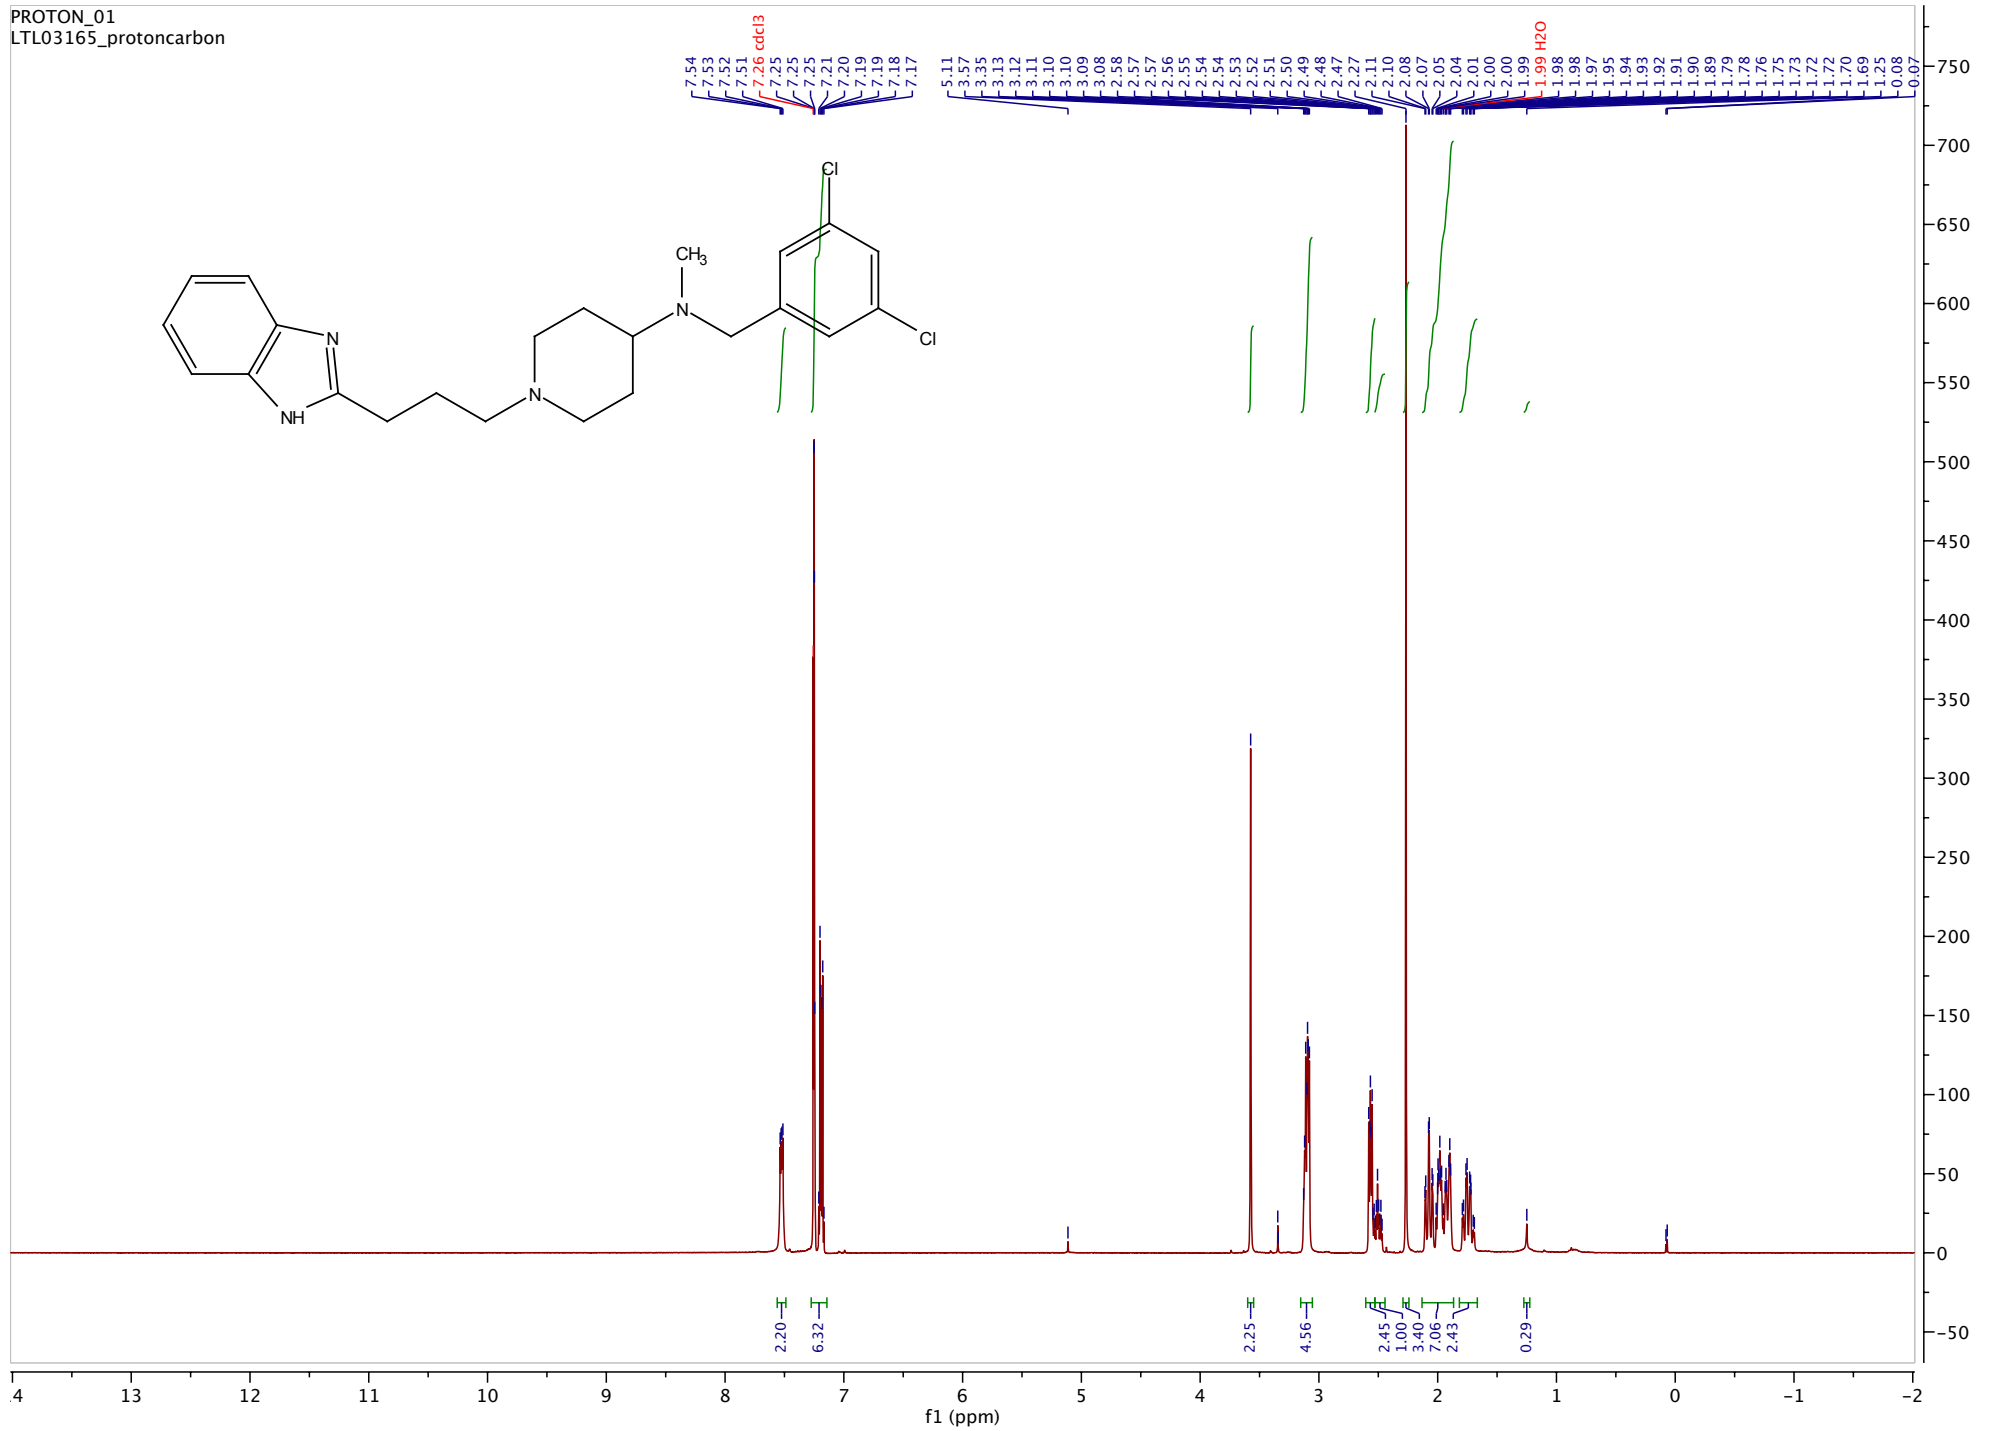

CARBON\_01  
LTL03165\_protoncarbon

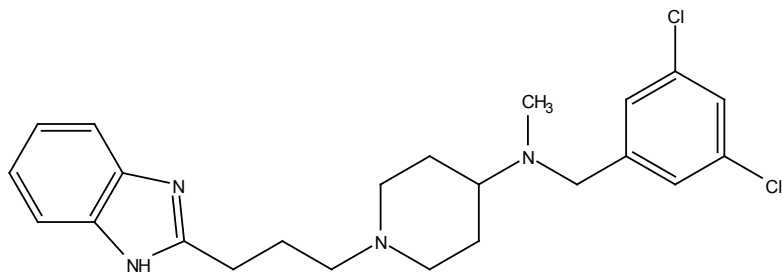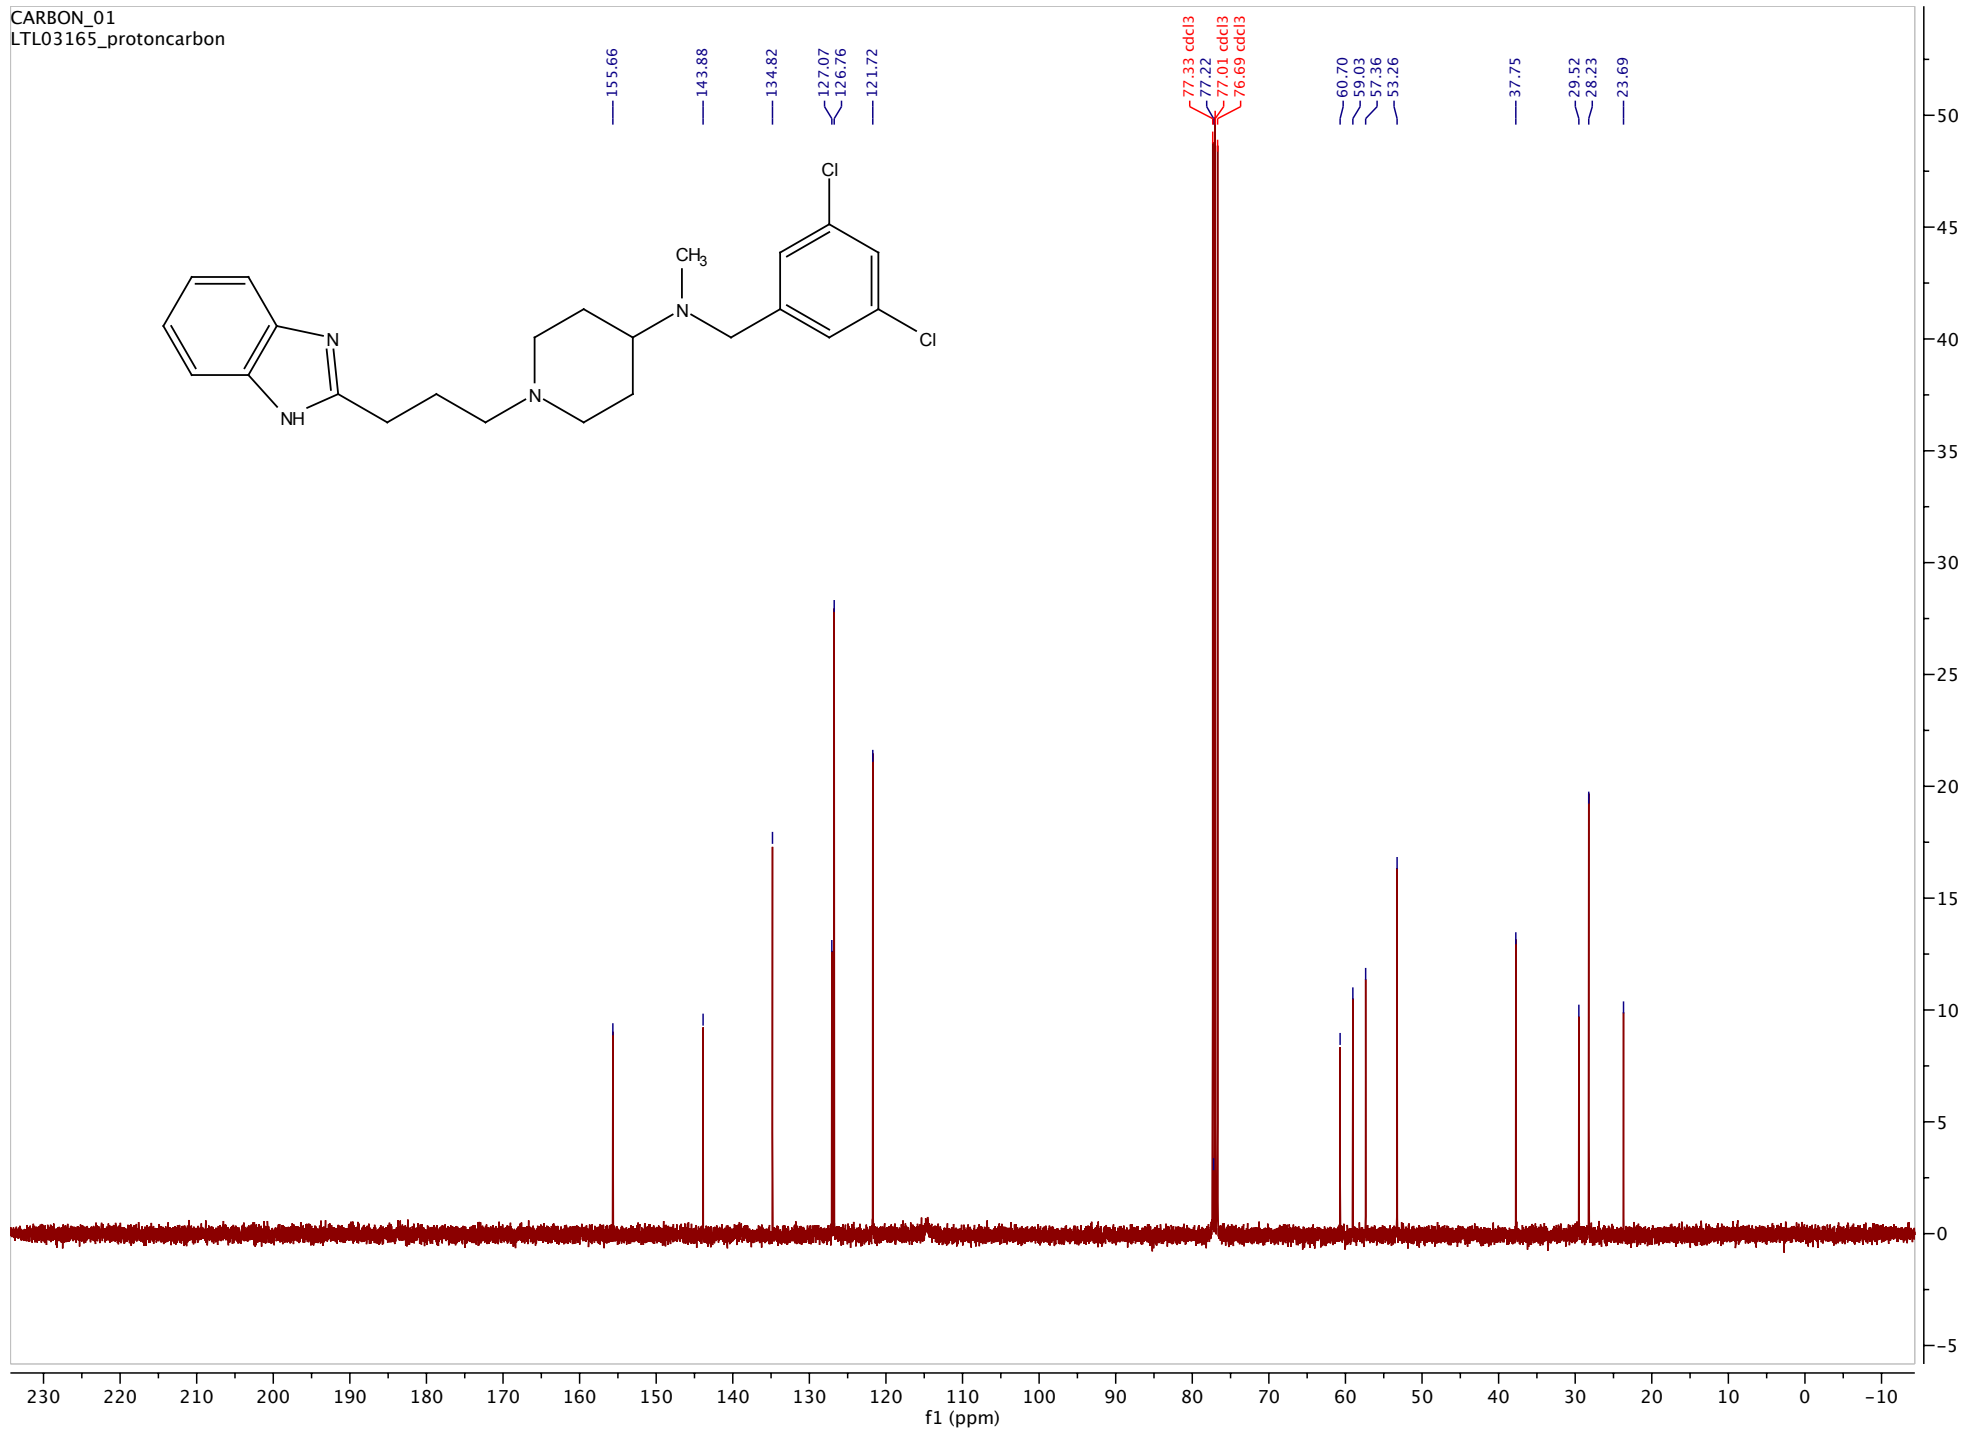

LTL03172\_1  
STANDARD 1H OBSERVE

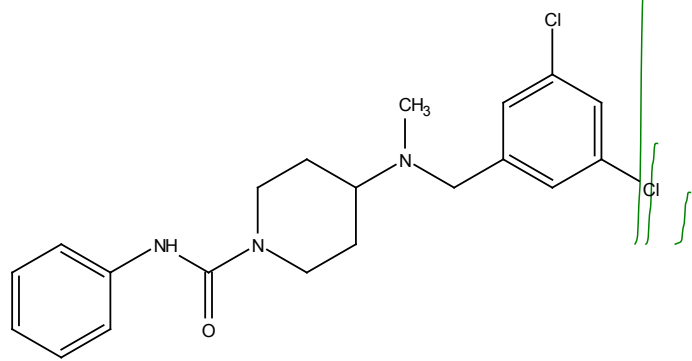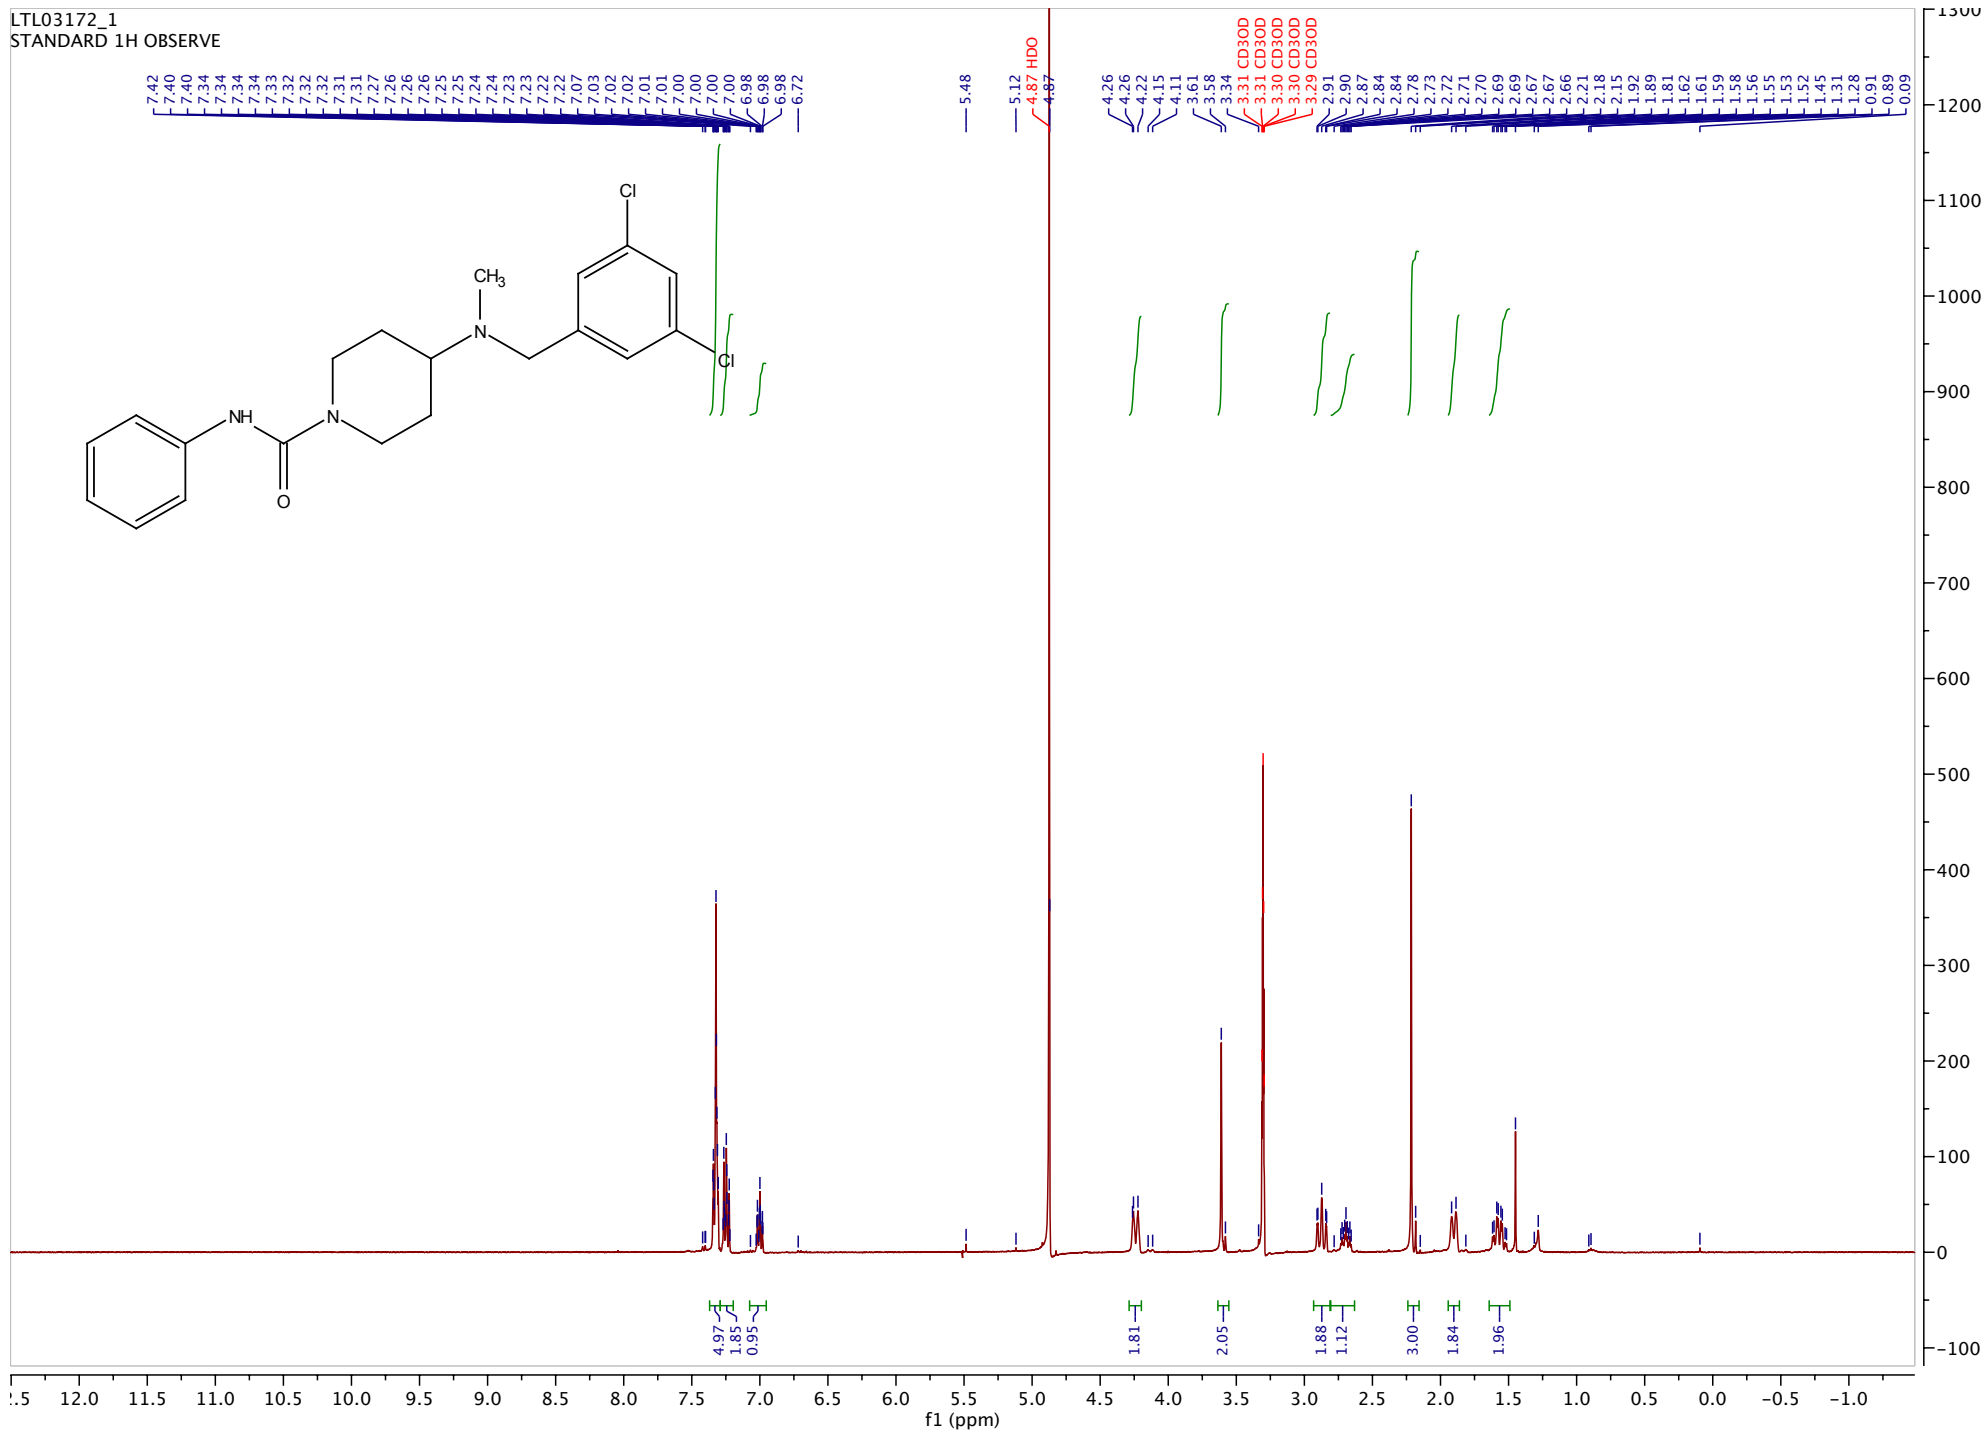

CARBON\_01  
LTL03172\_13C

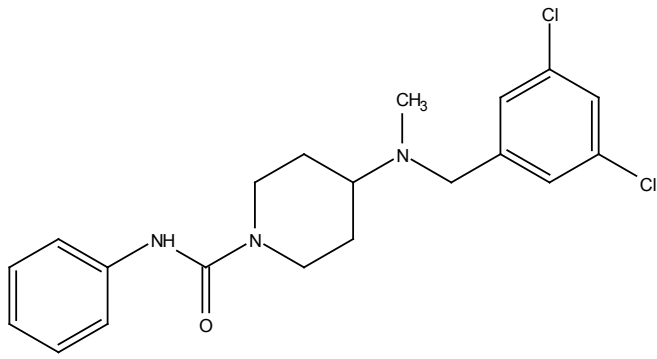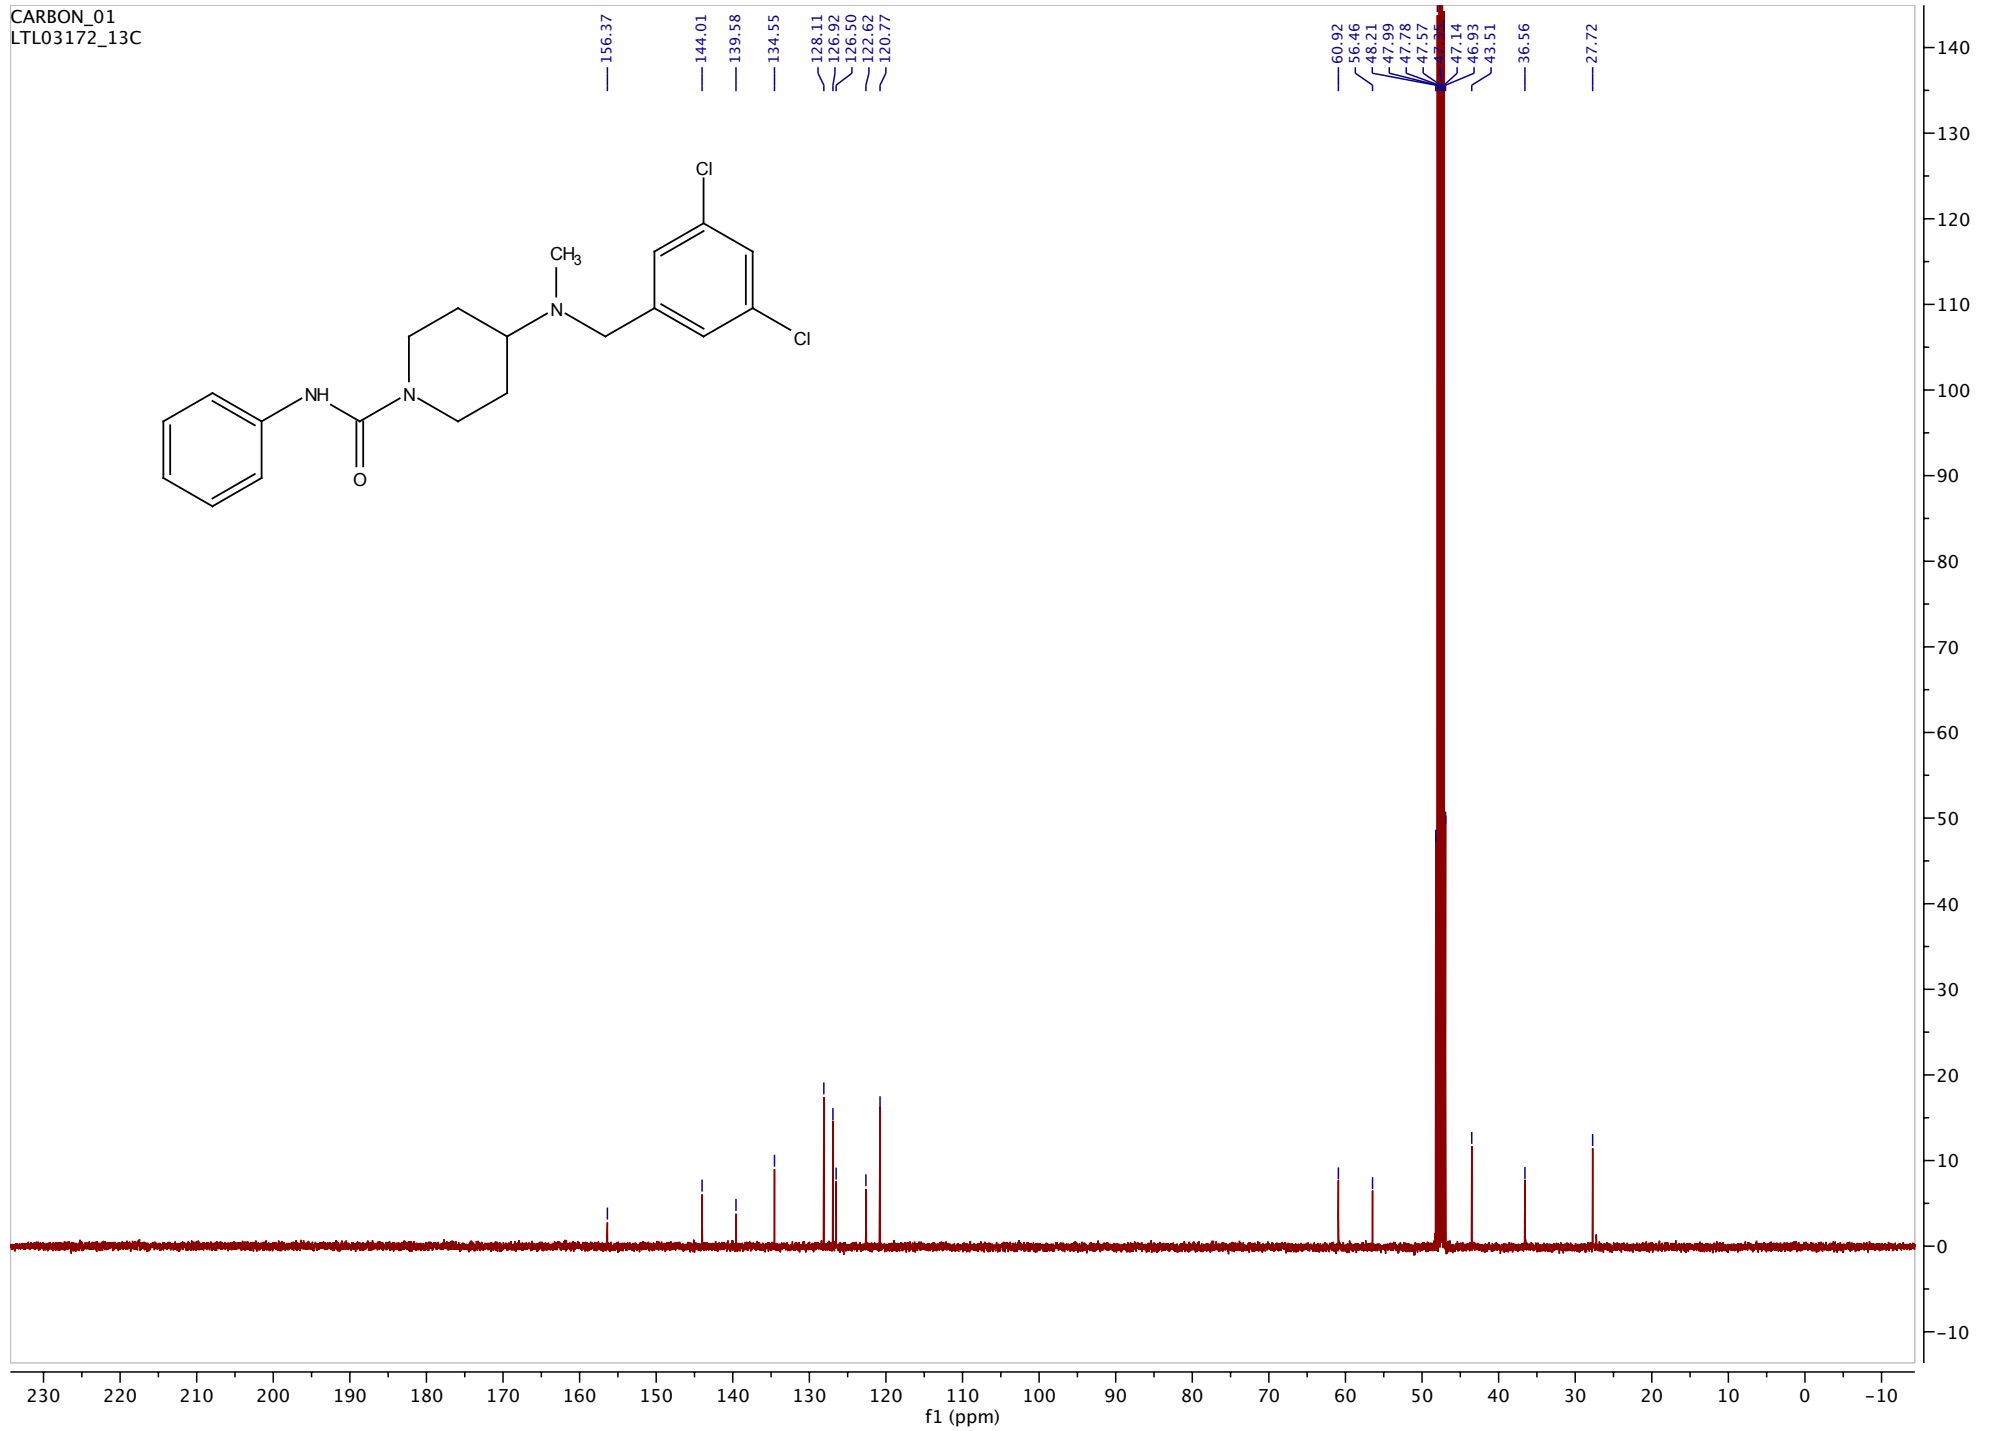

LTL03128\_CD3OD  
STANDARD 1H OBSERVE

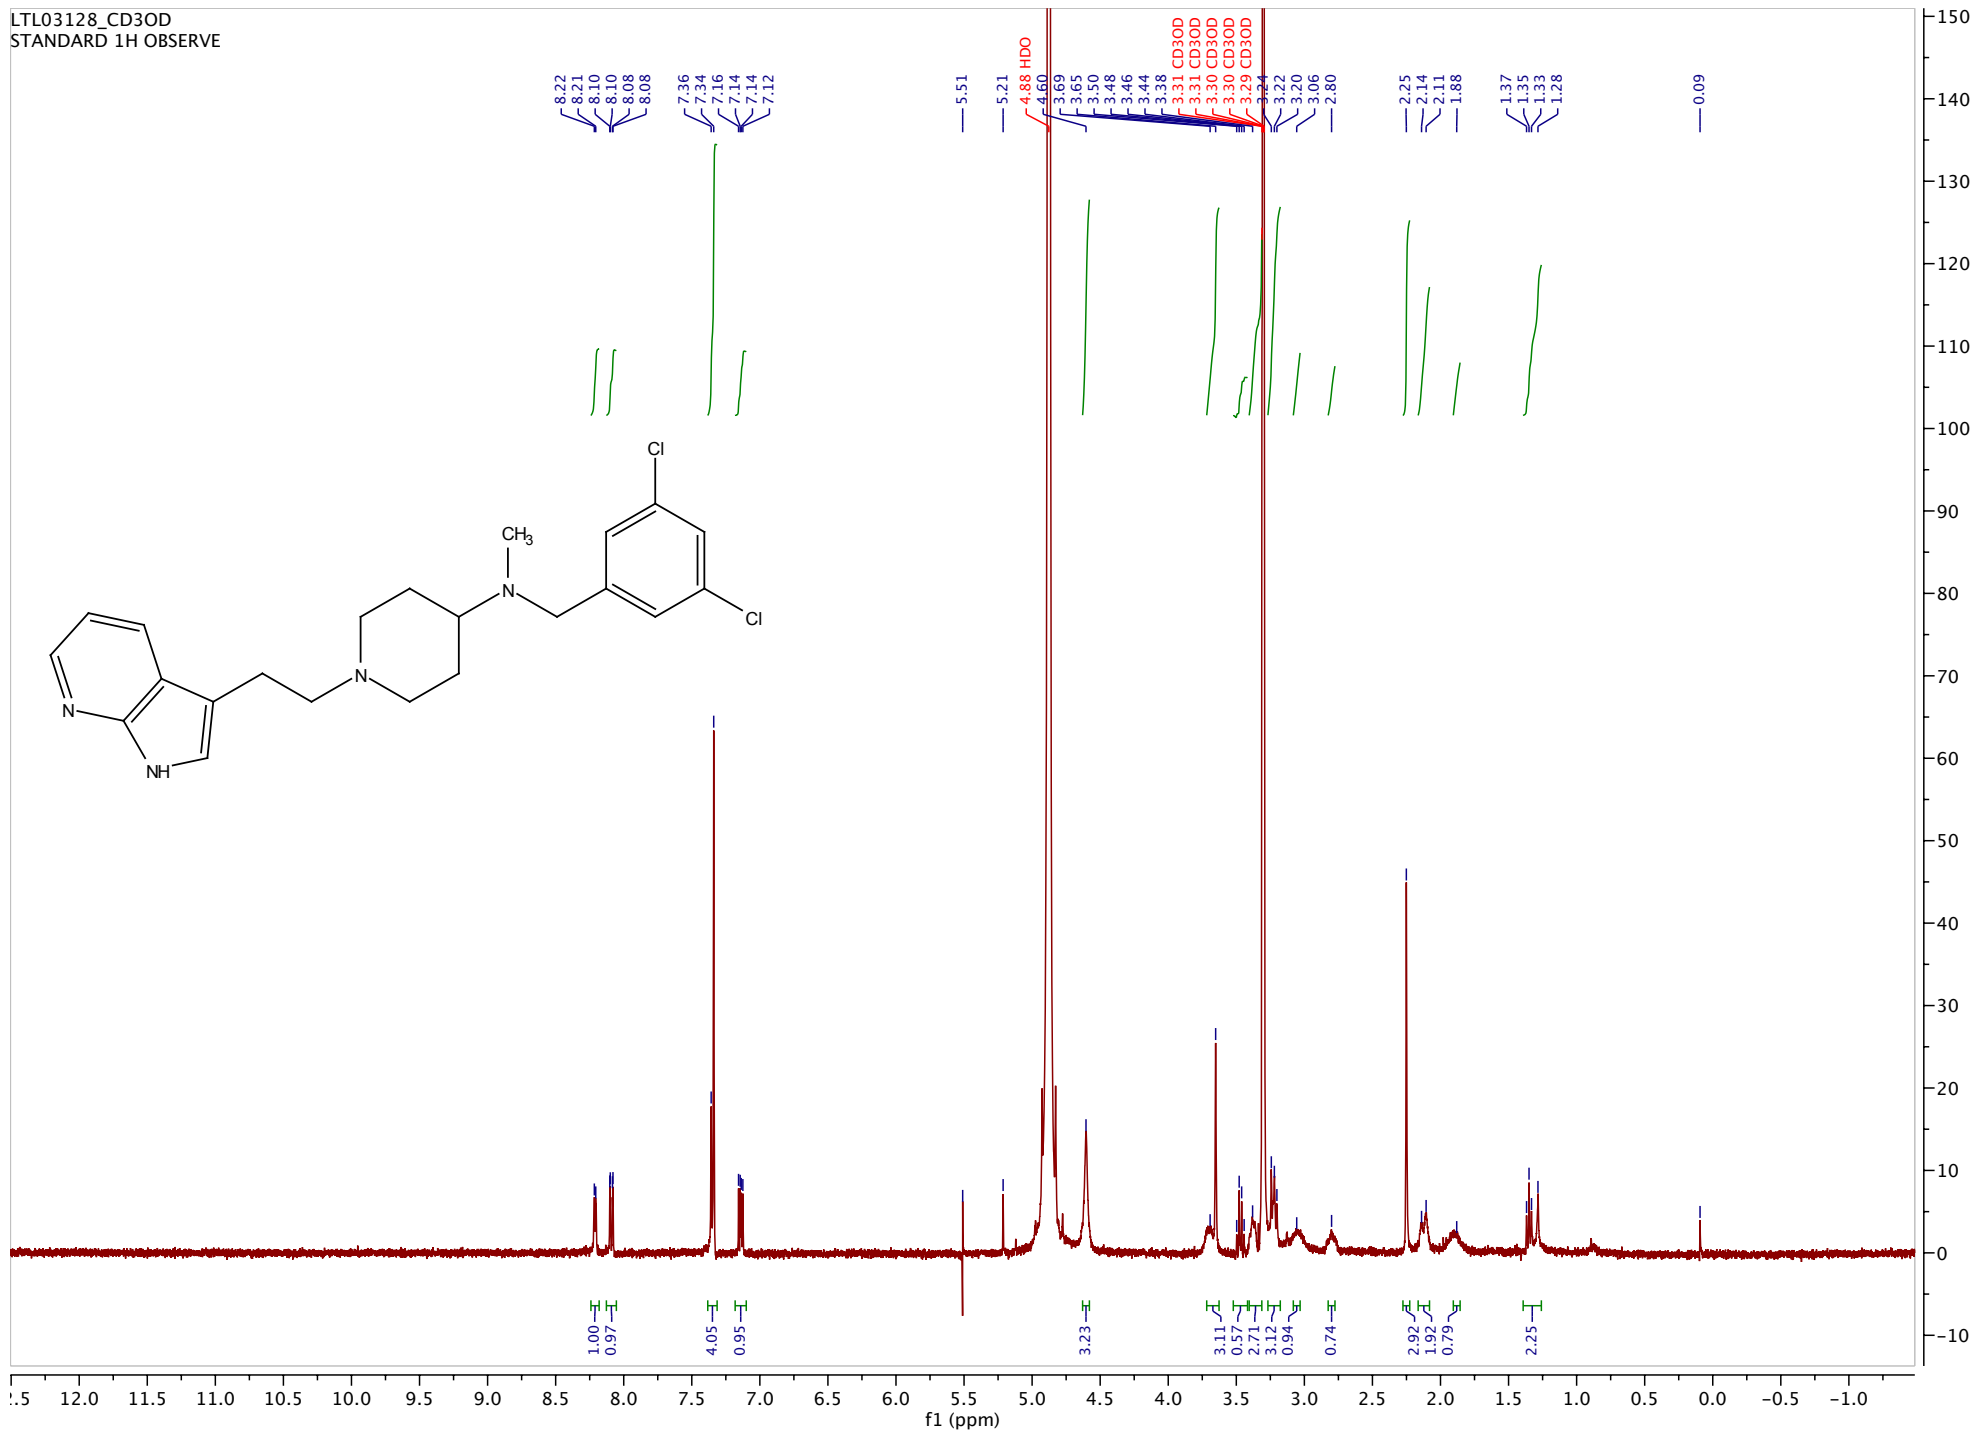

CARBON\_01  
LTL03128\_13C10k

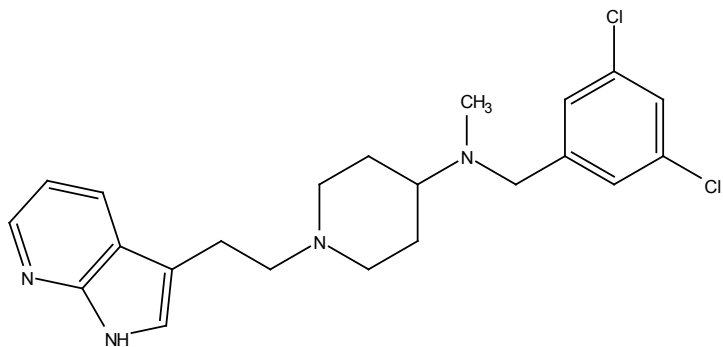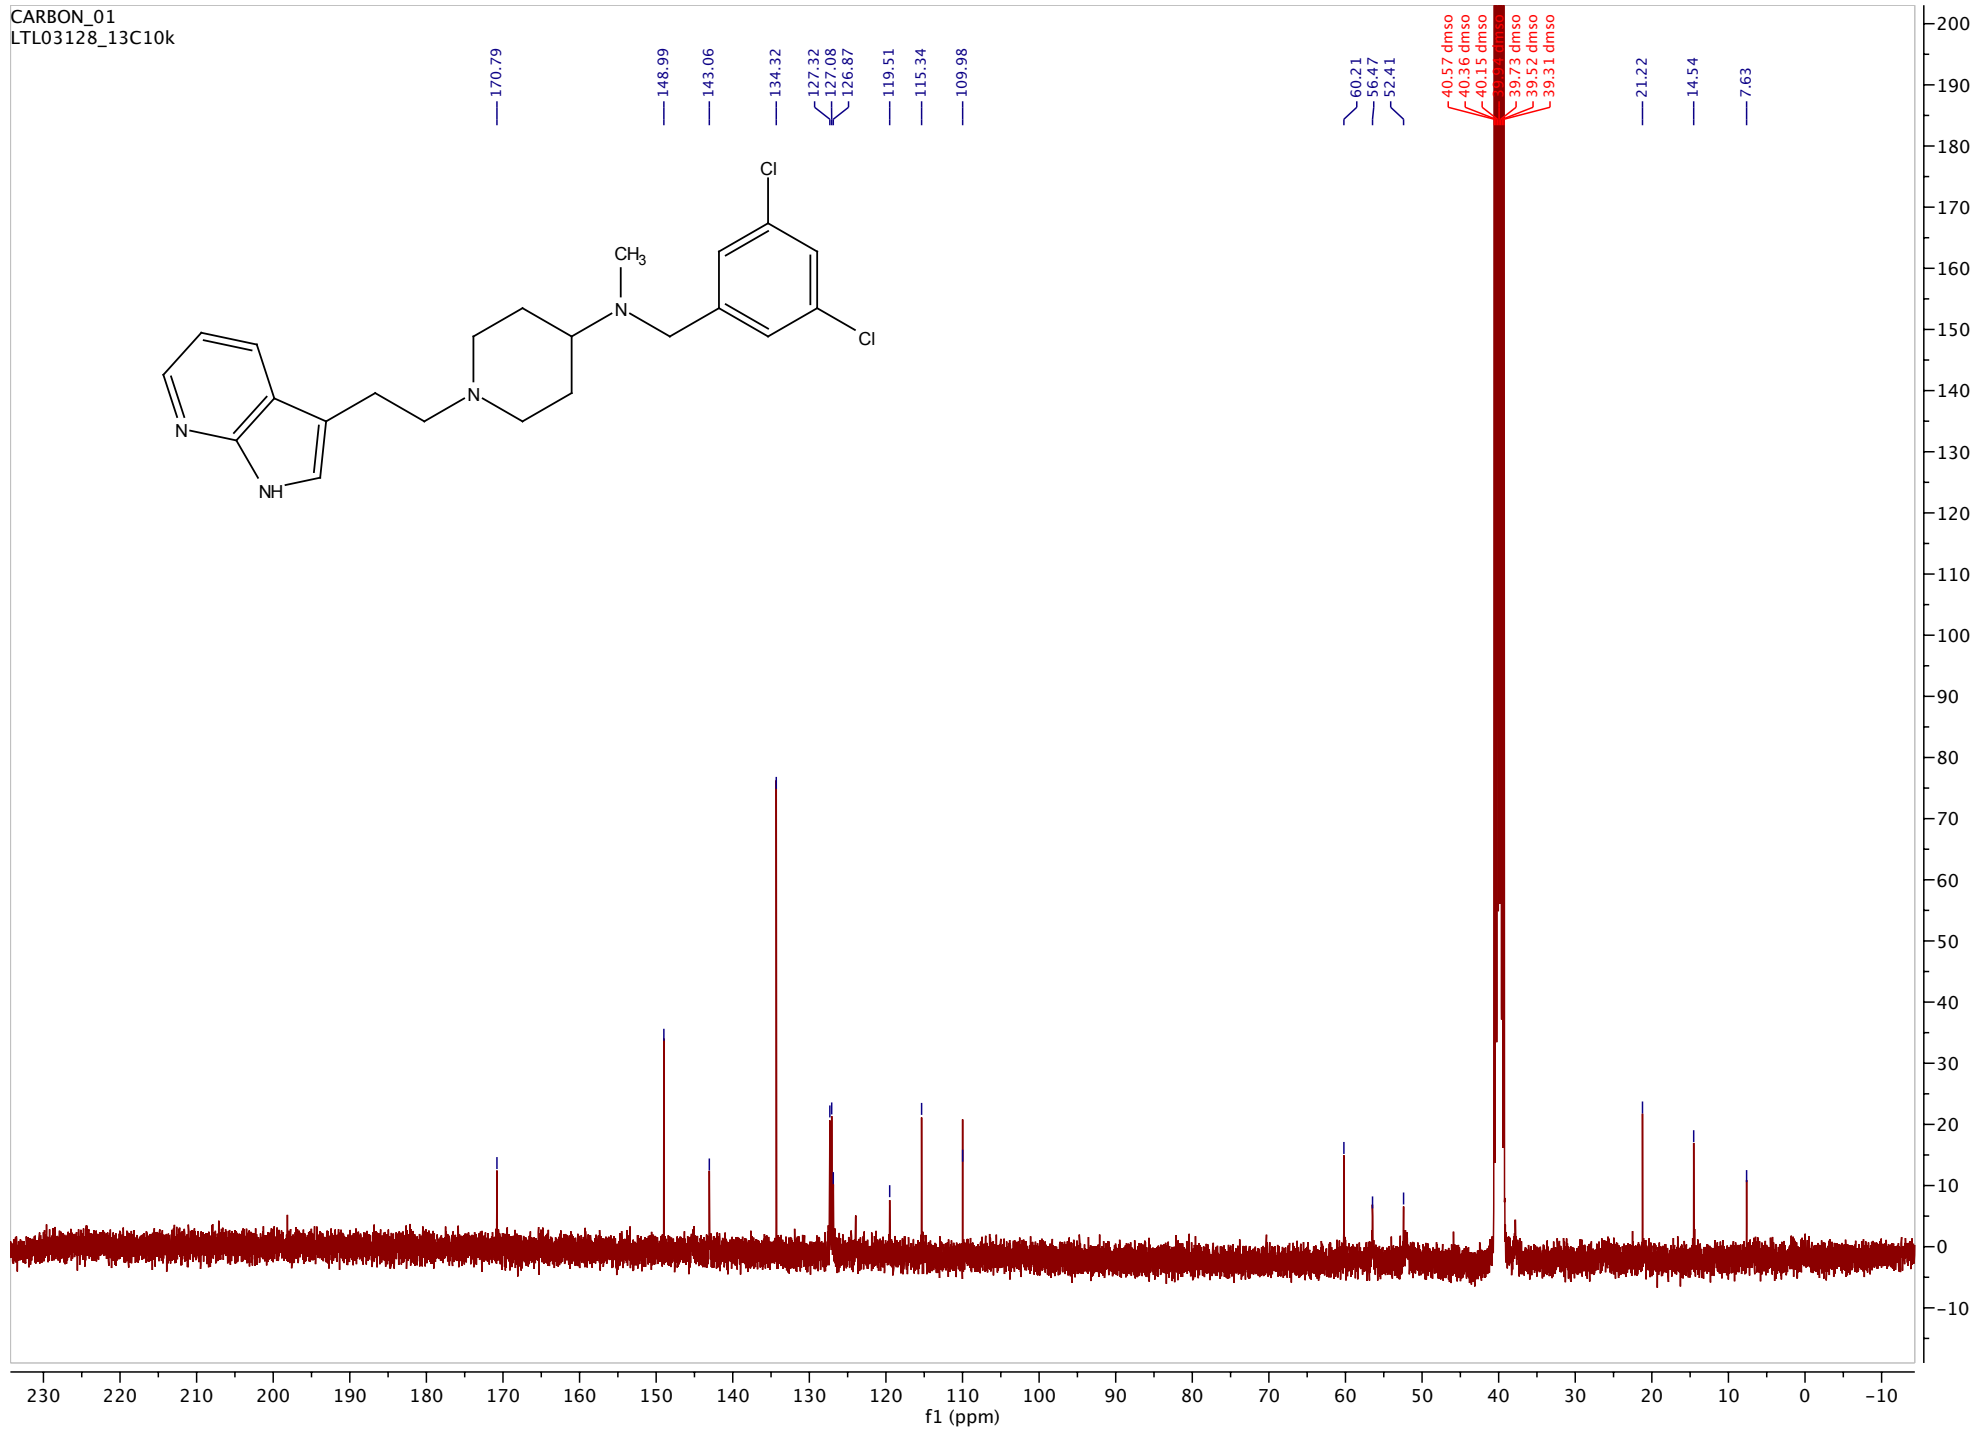



PROTON\_01  
LTL04071

10.01  
7.93  
7.35  
7.34  
7.33  
7.26 cdcl3  
7.25  
7.24  
7.24  
7.23  
7.22  
7.22  
7.22  
7.21  
7.20  
7.20  
7.19  
7.19  
7.18  
7.06  
7.05  
7.01  
7.00  
6.87  
6.86  
6.84  
6.84  
5.30  
5.12  
4.15  
4.13  
4.11  
4.10  
3.91  
3.90  
3.86  
3.71  
3.57  
3.42  
3.35  
3.31  
3.30  
3.29  
3.29  
3.27  
3.19  
3.16  
3.01  
2.97  
2.95  
2.93  
2.71  
2.70  
2.70  
2.69  
2.68  
2.68  
2.67  
2.53  
2.52  
2.51  
2.50  
2.49  
2.48  
2.47  
2.46  
2.45  
2.27  
2.22  
2.19  
2.09  
2.08  
2.07  
2.06  
2.05 H2O  
2.04  
2.04  
2.03  
1.97  
1.87  
1.84  
1.79  
1.78  
1.76  
1.75  
1.73  
1.72  
1.69  
1.69  
1.48  
1.31  
1.28  
1.26  
1.26  
1.25  
1.25  
1.16  
1.14  
1.13  
1.12  
1.11  
1.10  
0.88  
0.84  
0.07

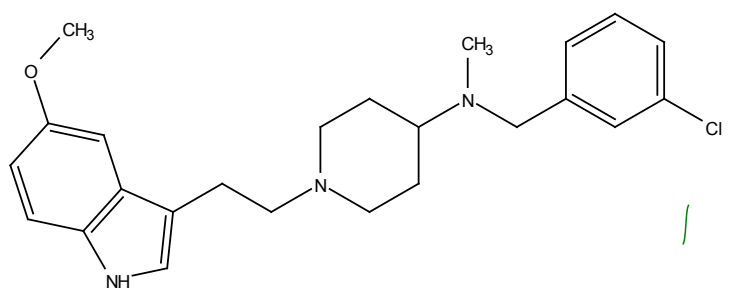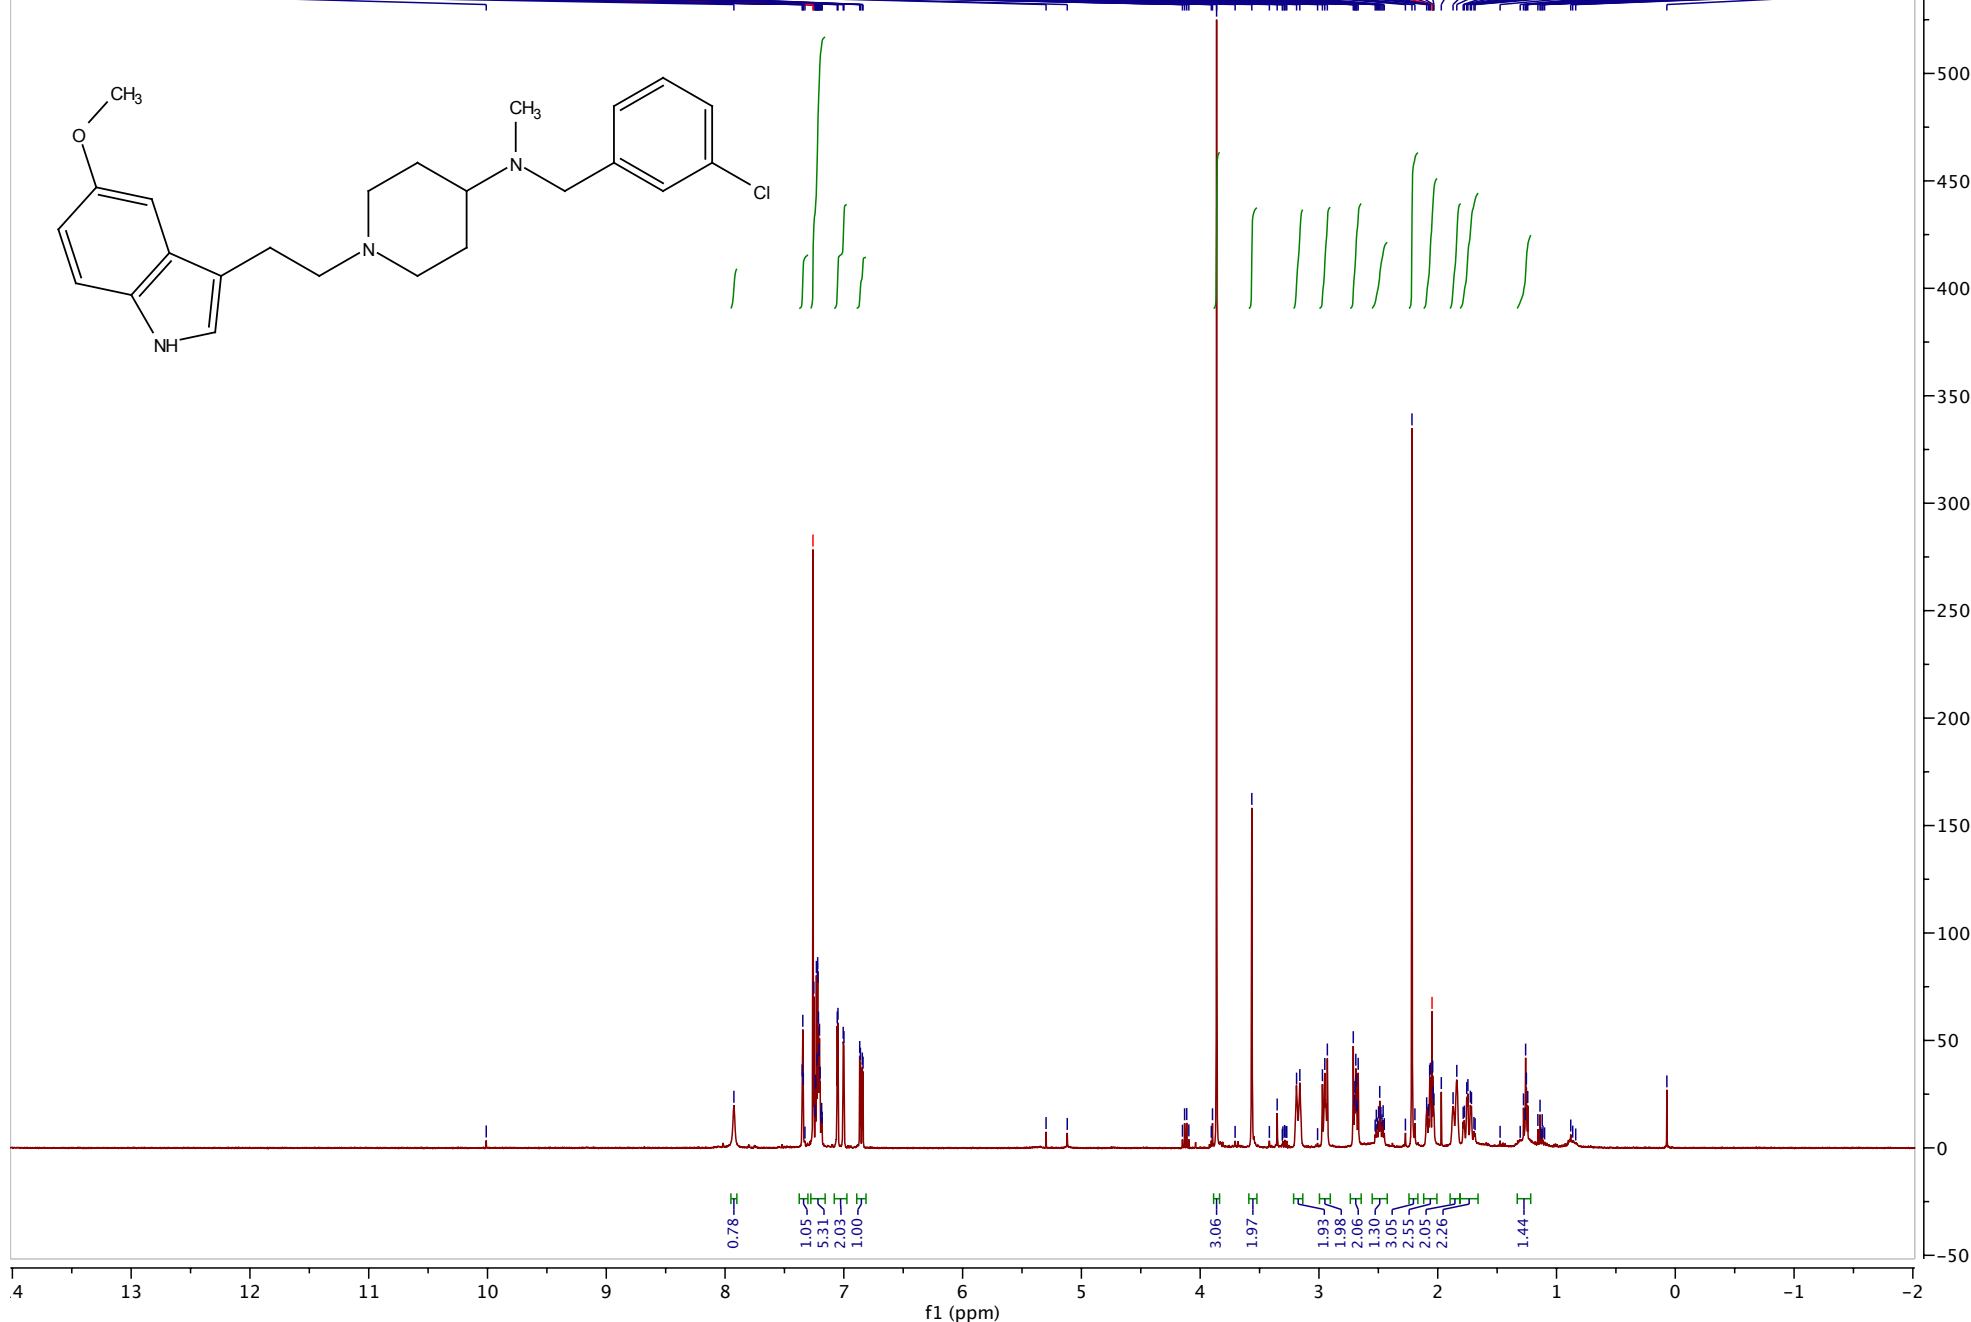

f1 (ppm)

CARBON\_01  
LTL04071\_13C

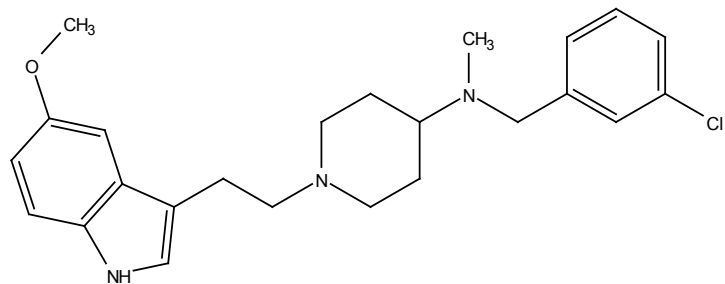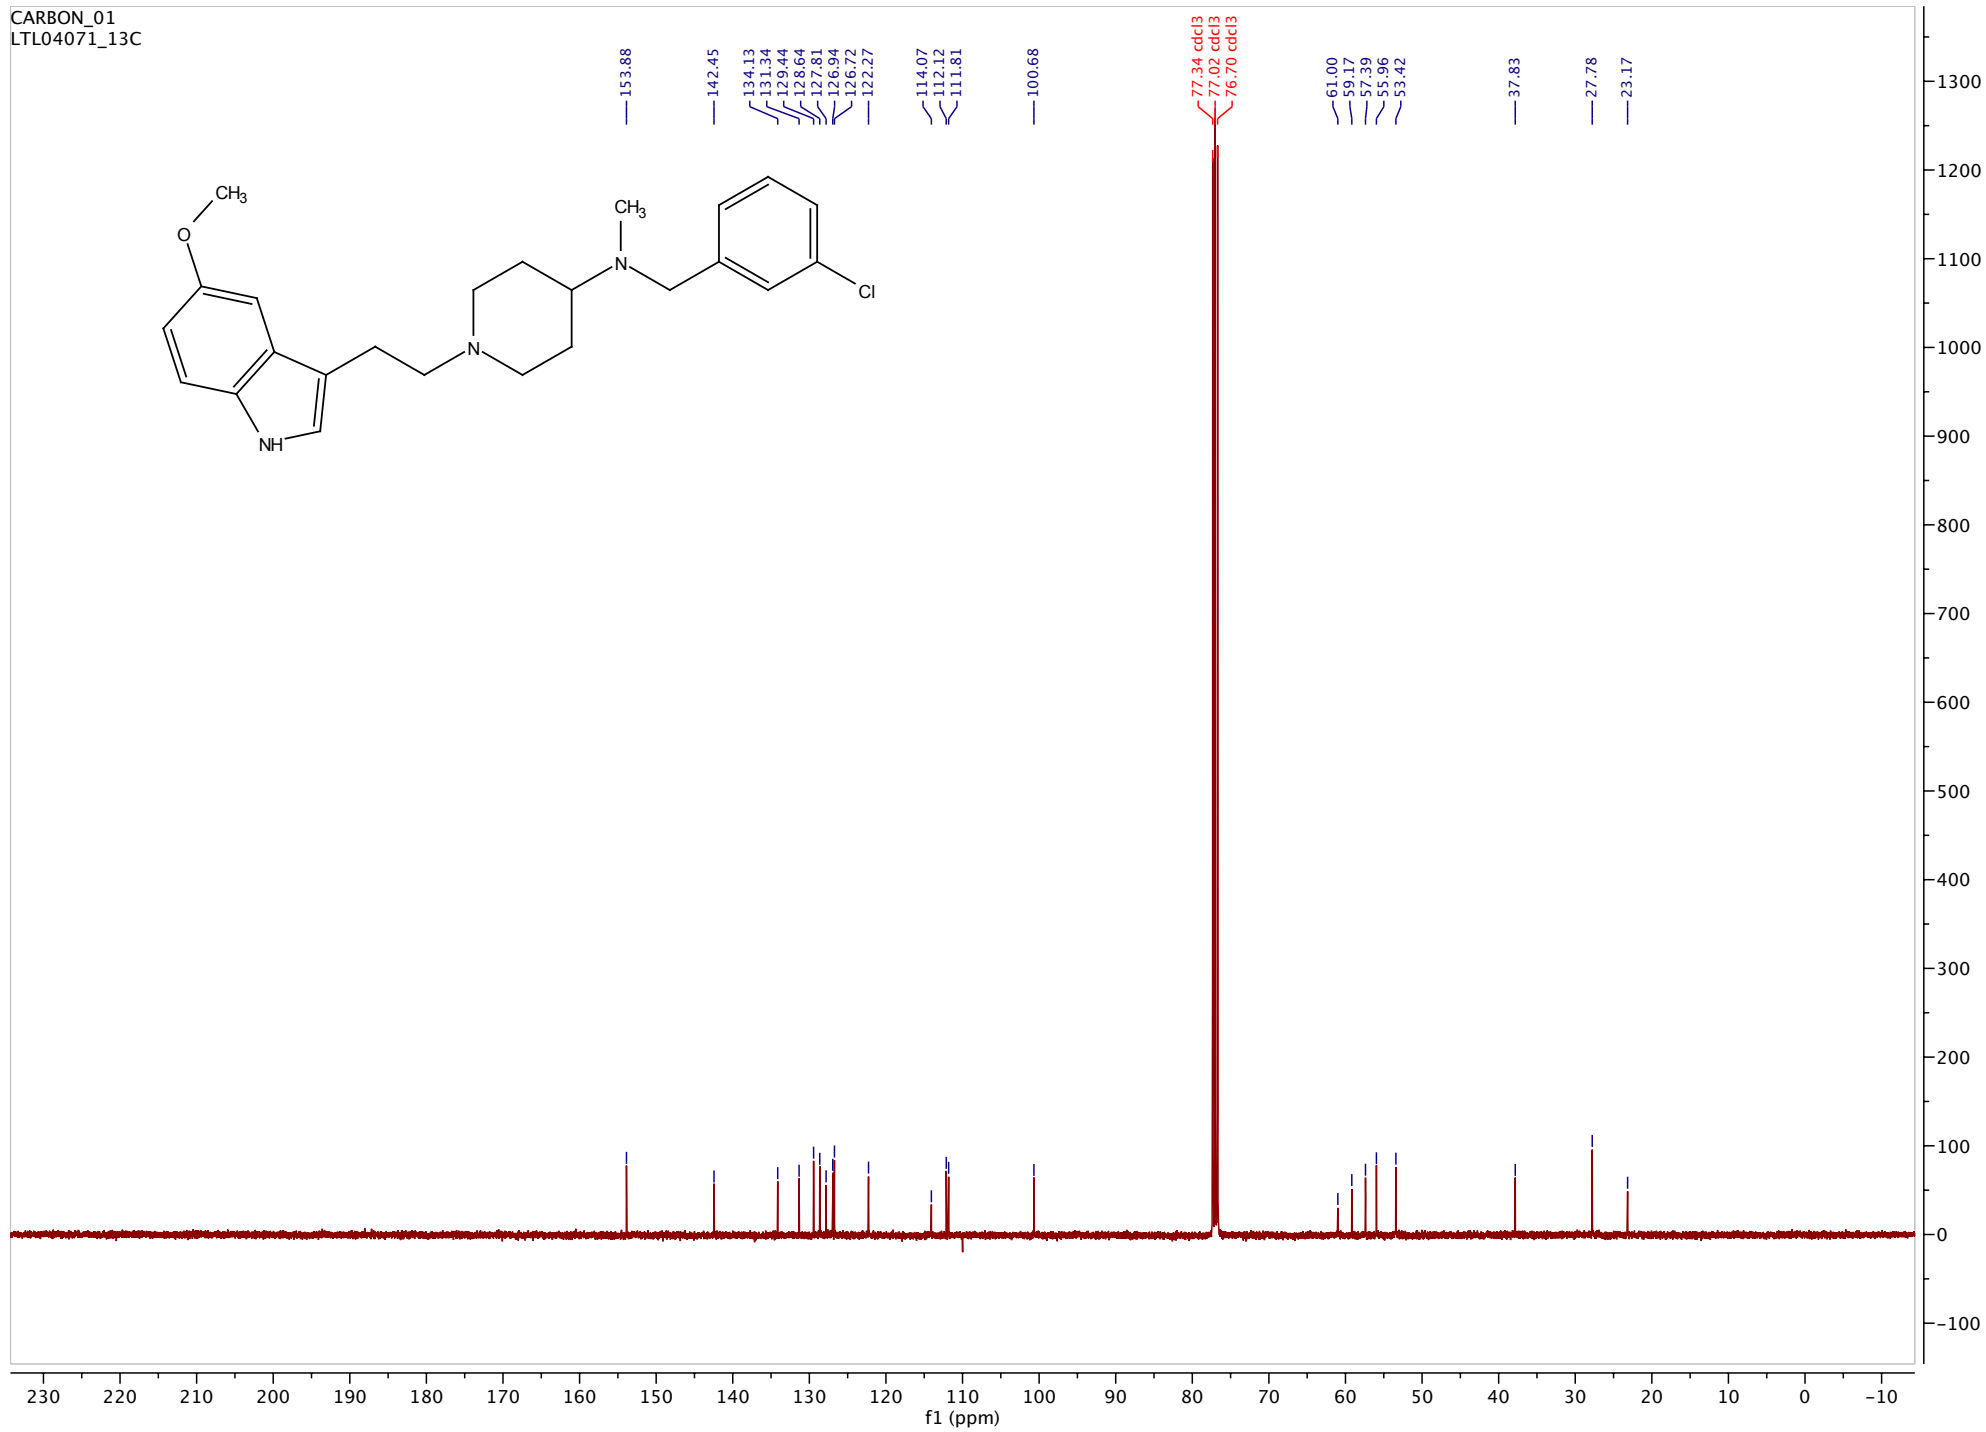

LTL03155  
STANDARD 1H OBSERVE

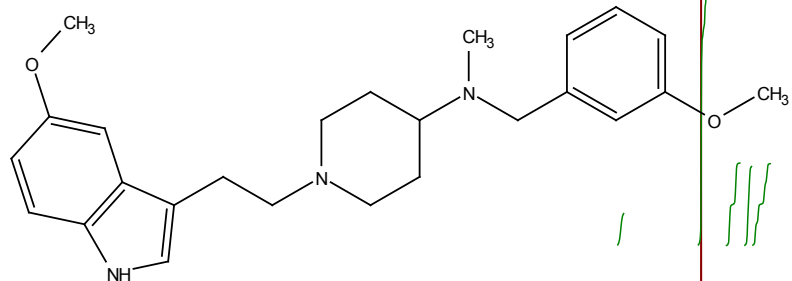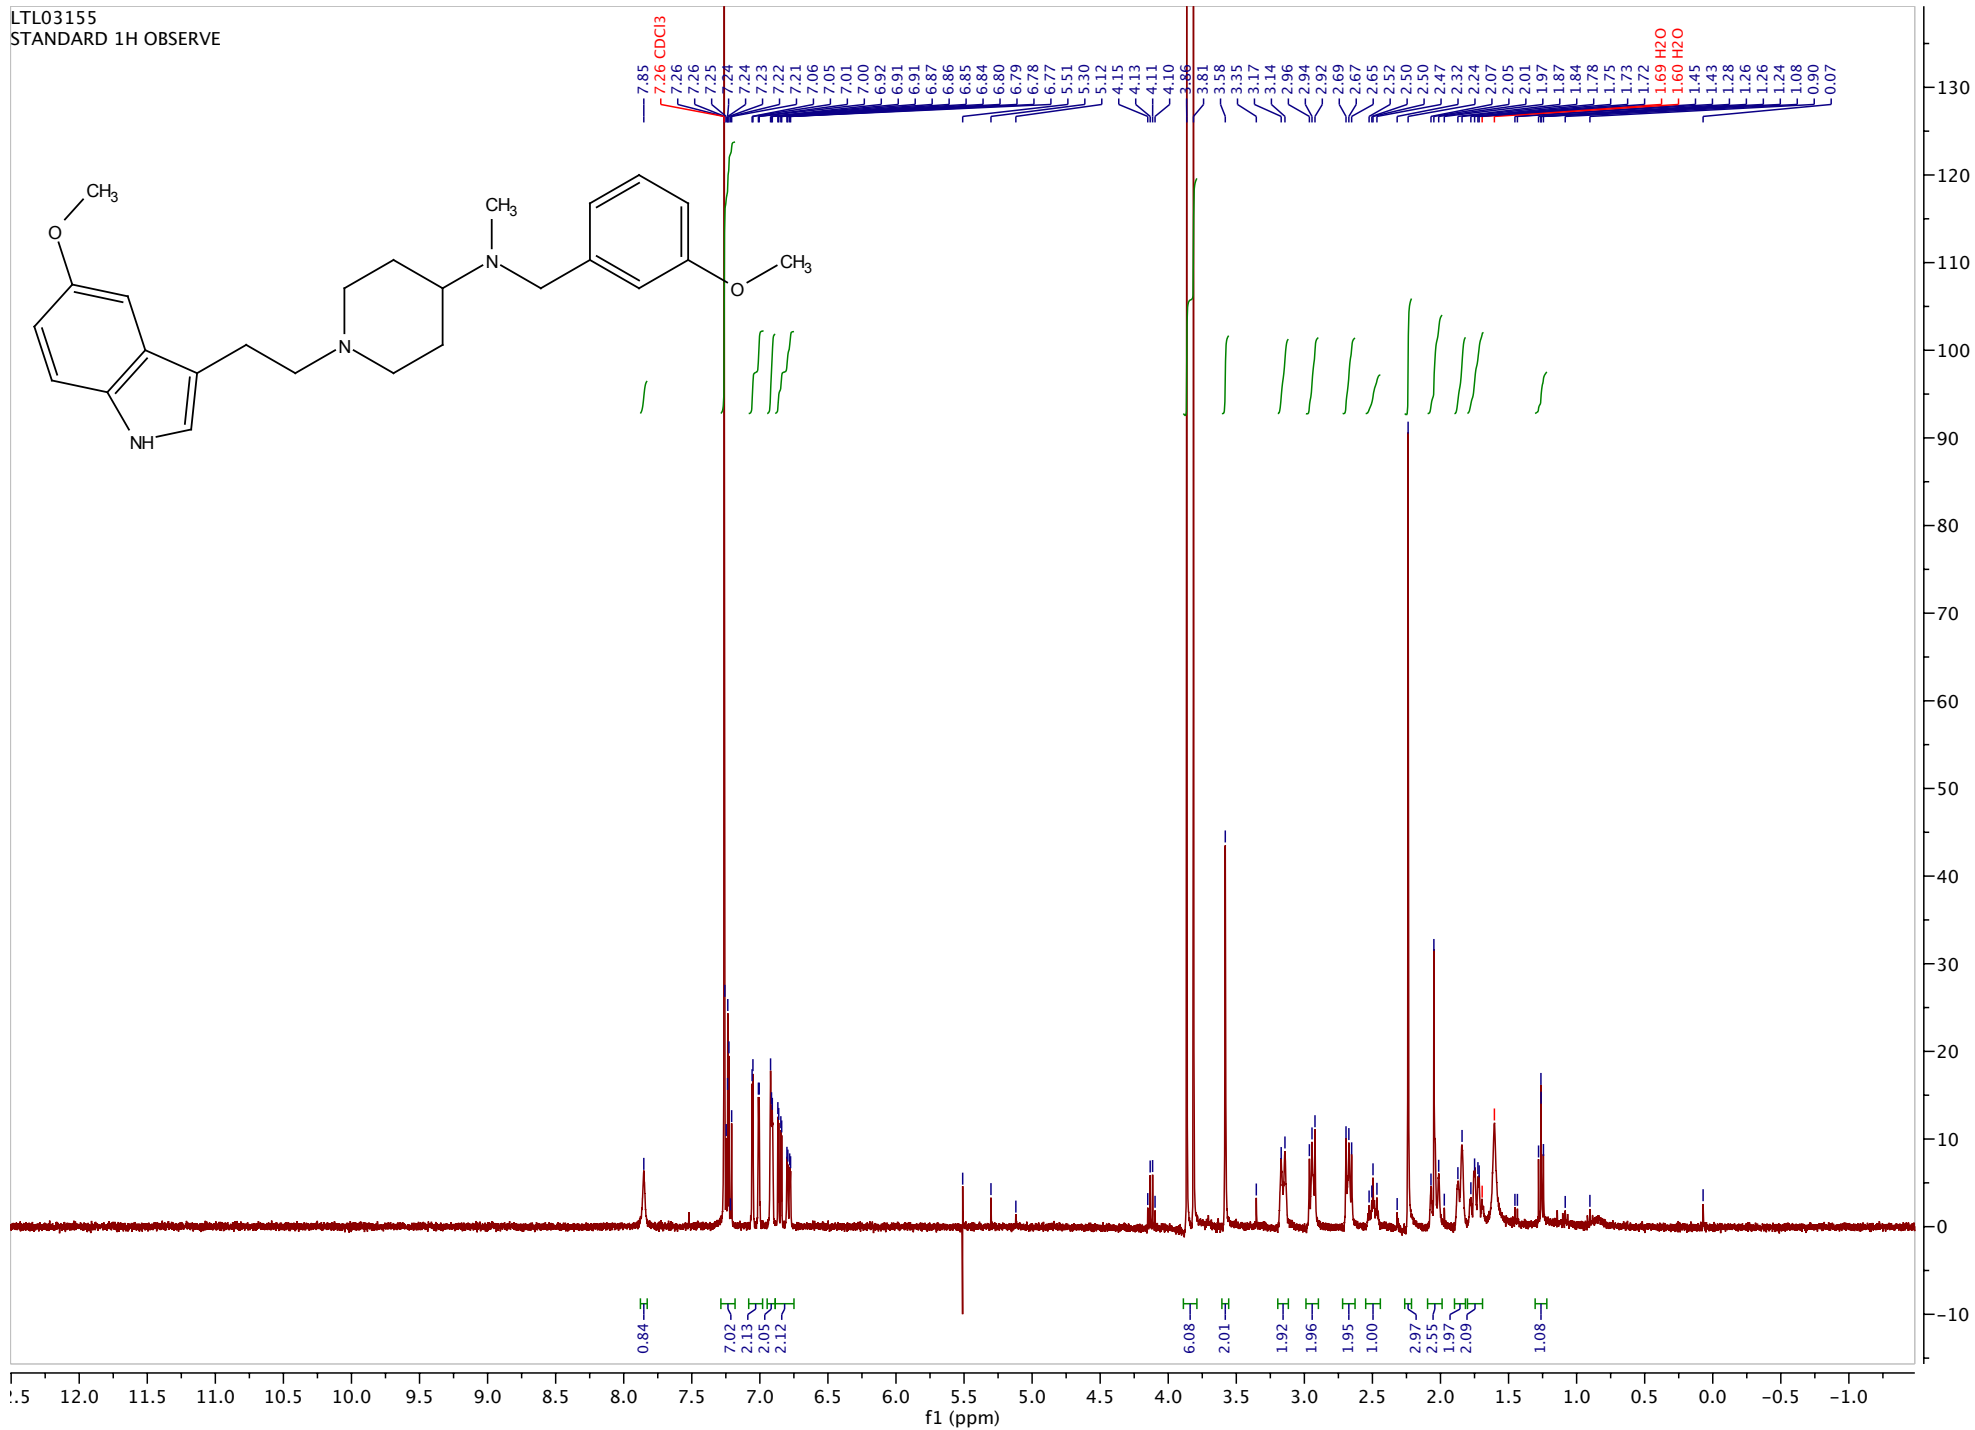

CARBON\_01  
LTL03155

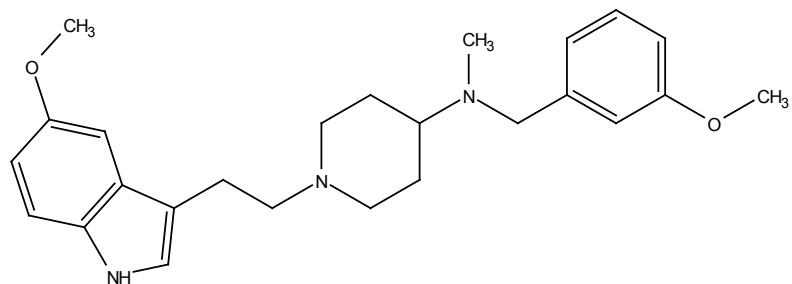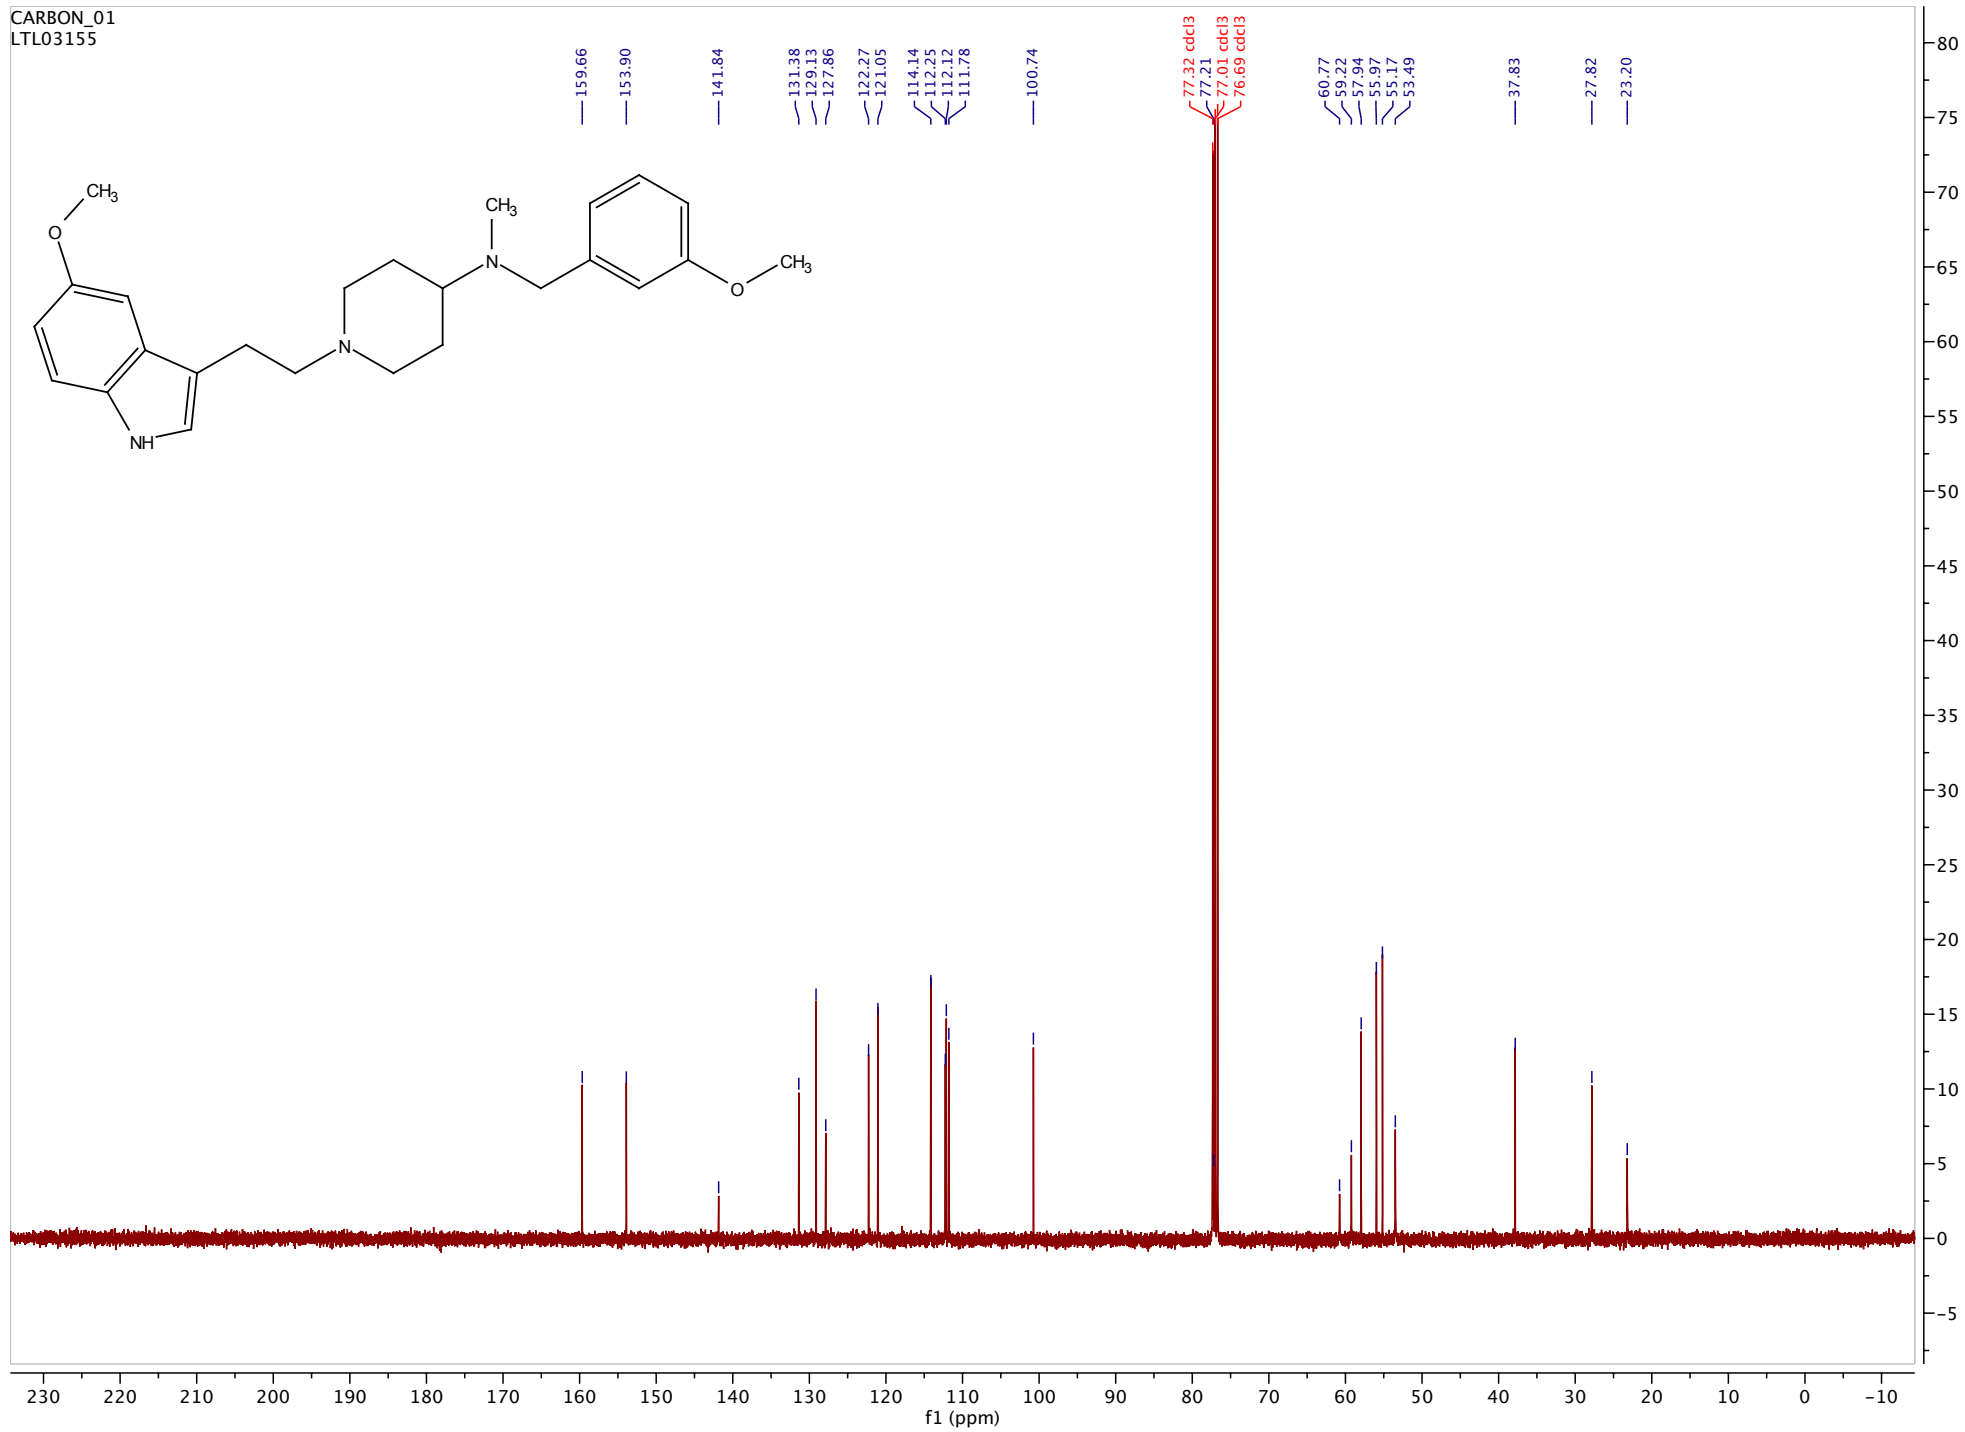

LTL03151  
STANDARD 1H OBSERVE

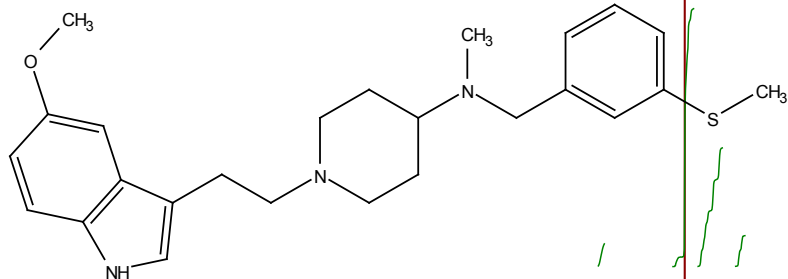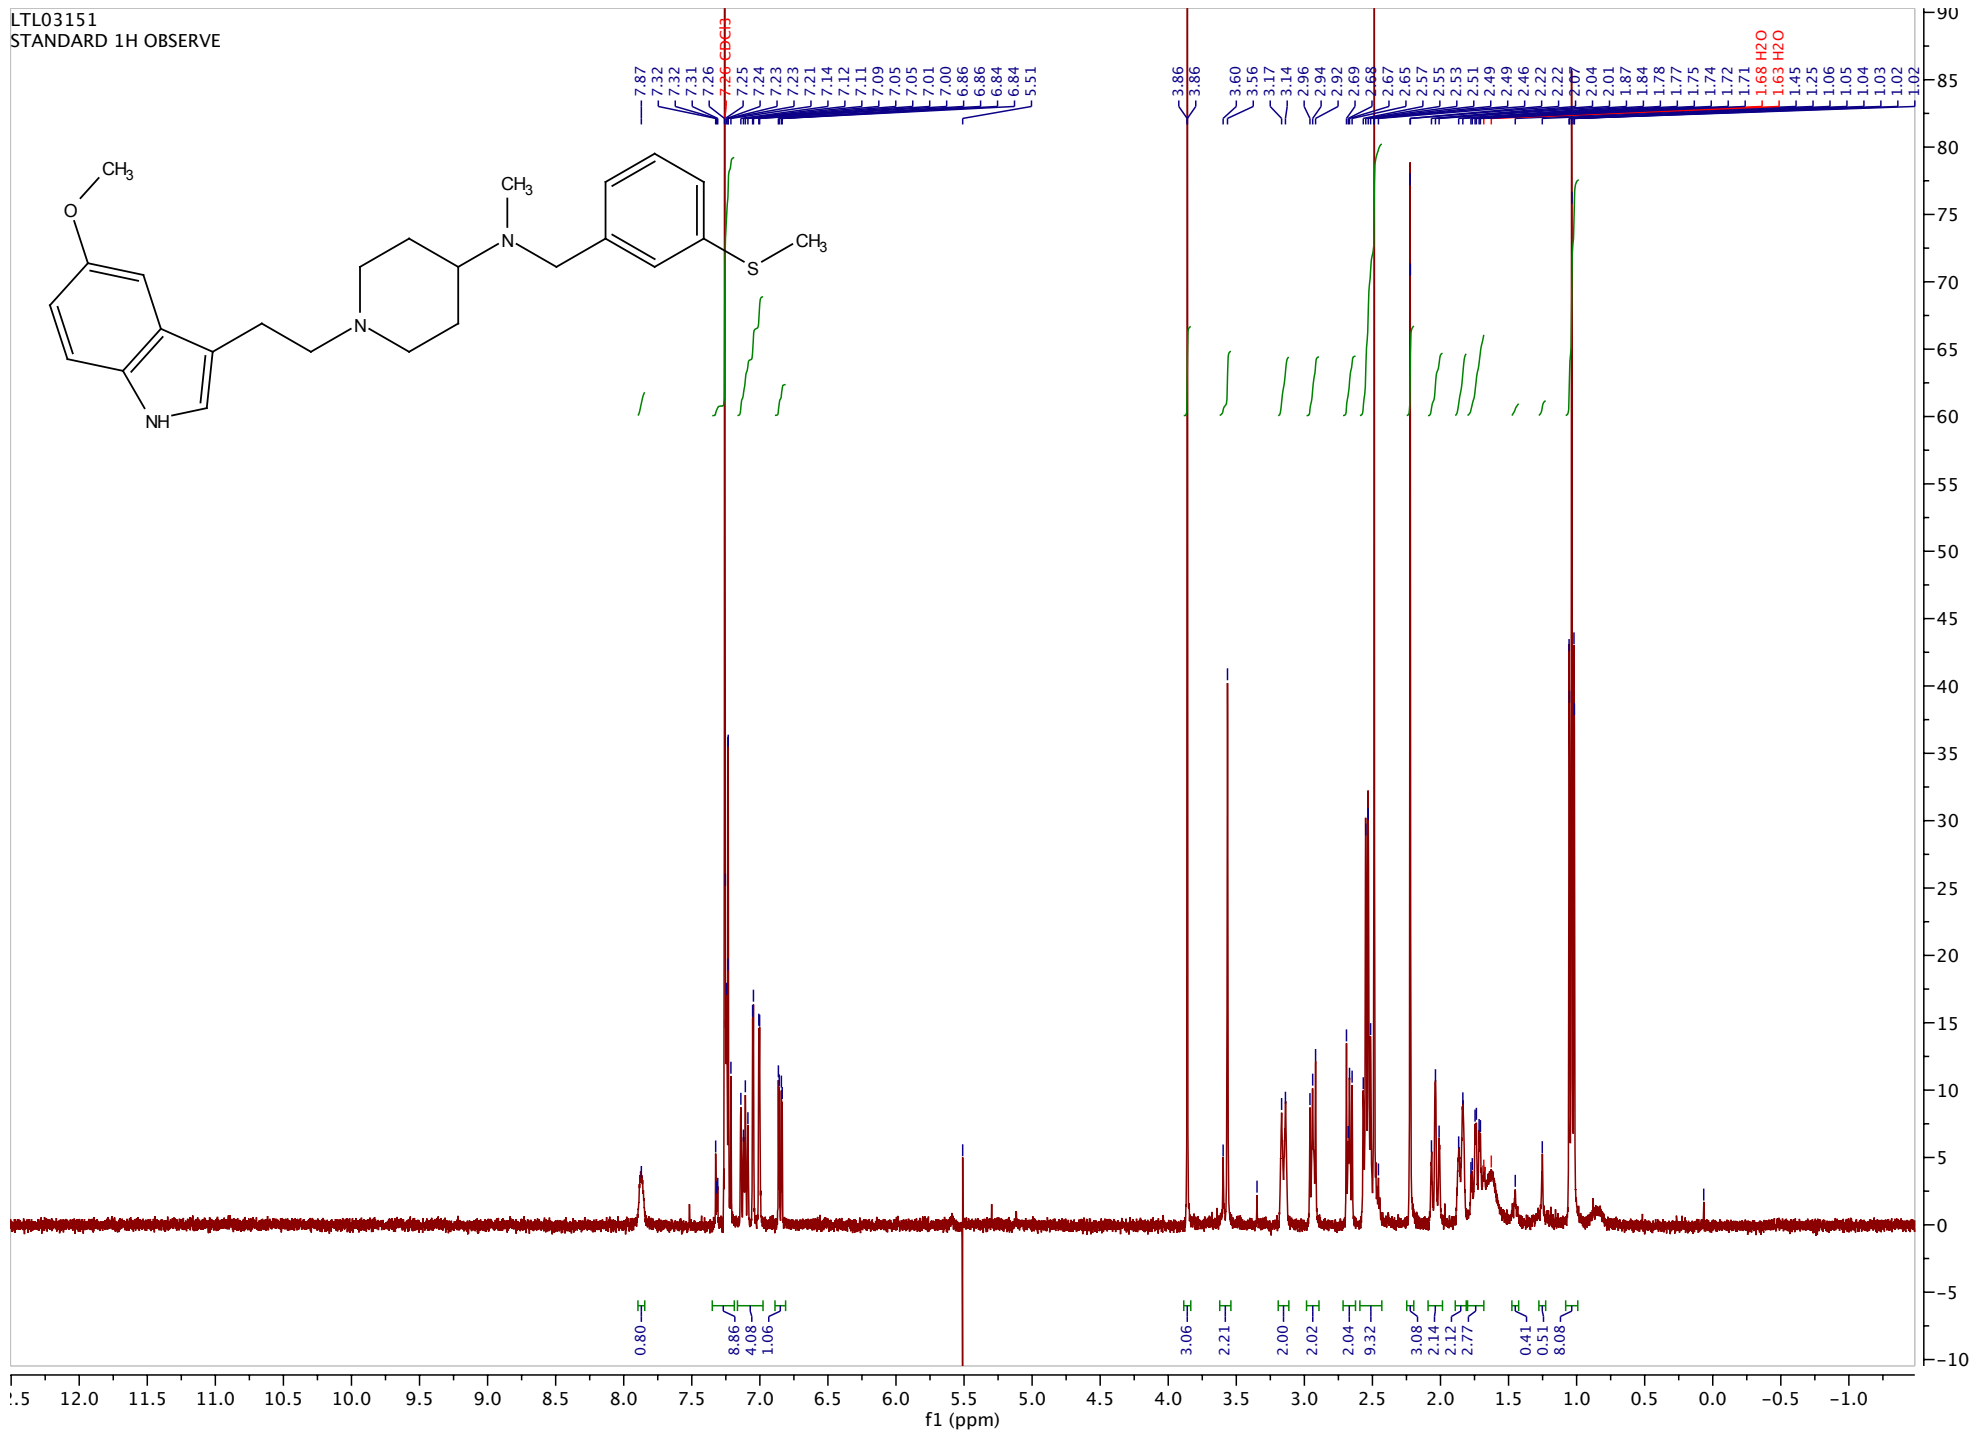

LTL03154  
STANDARD 1H OBSERVE

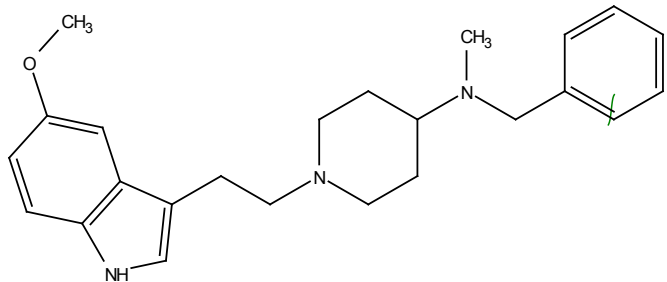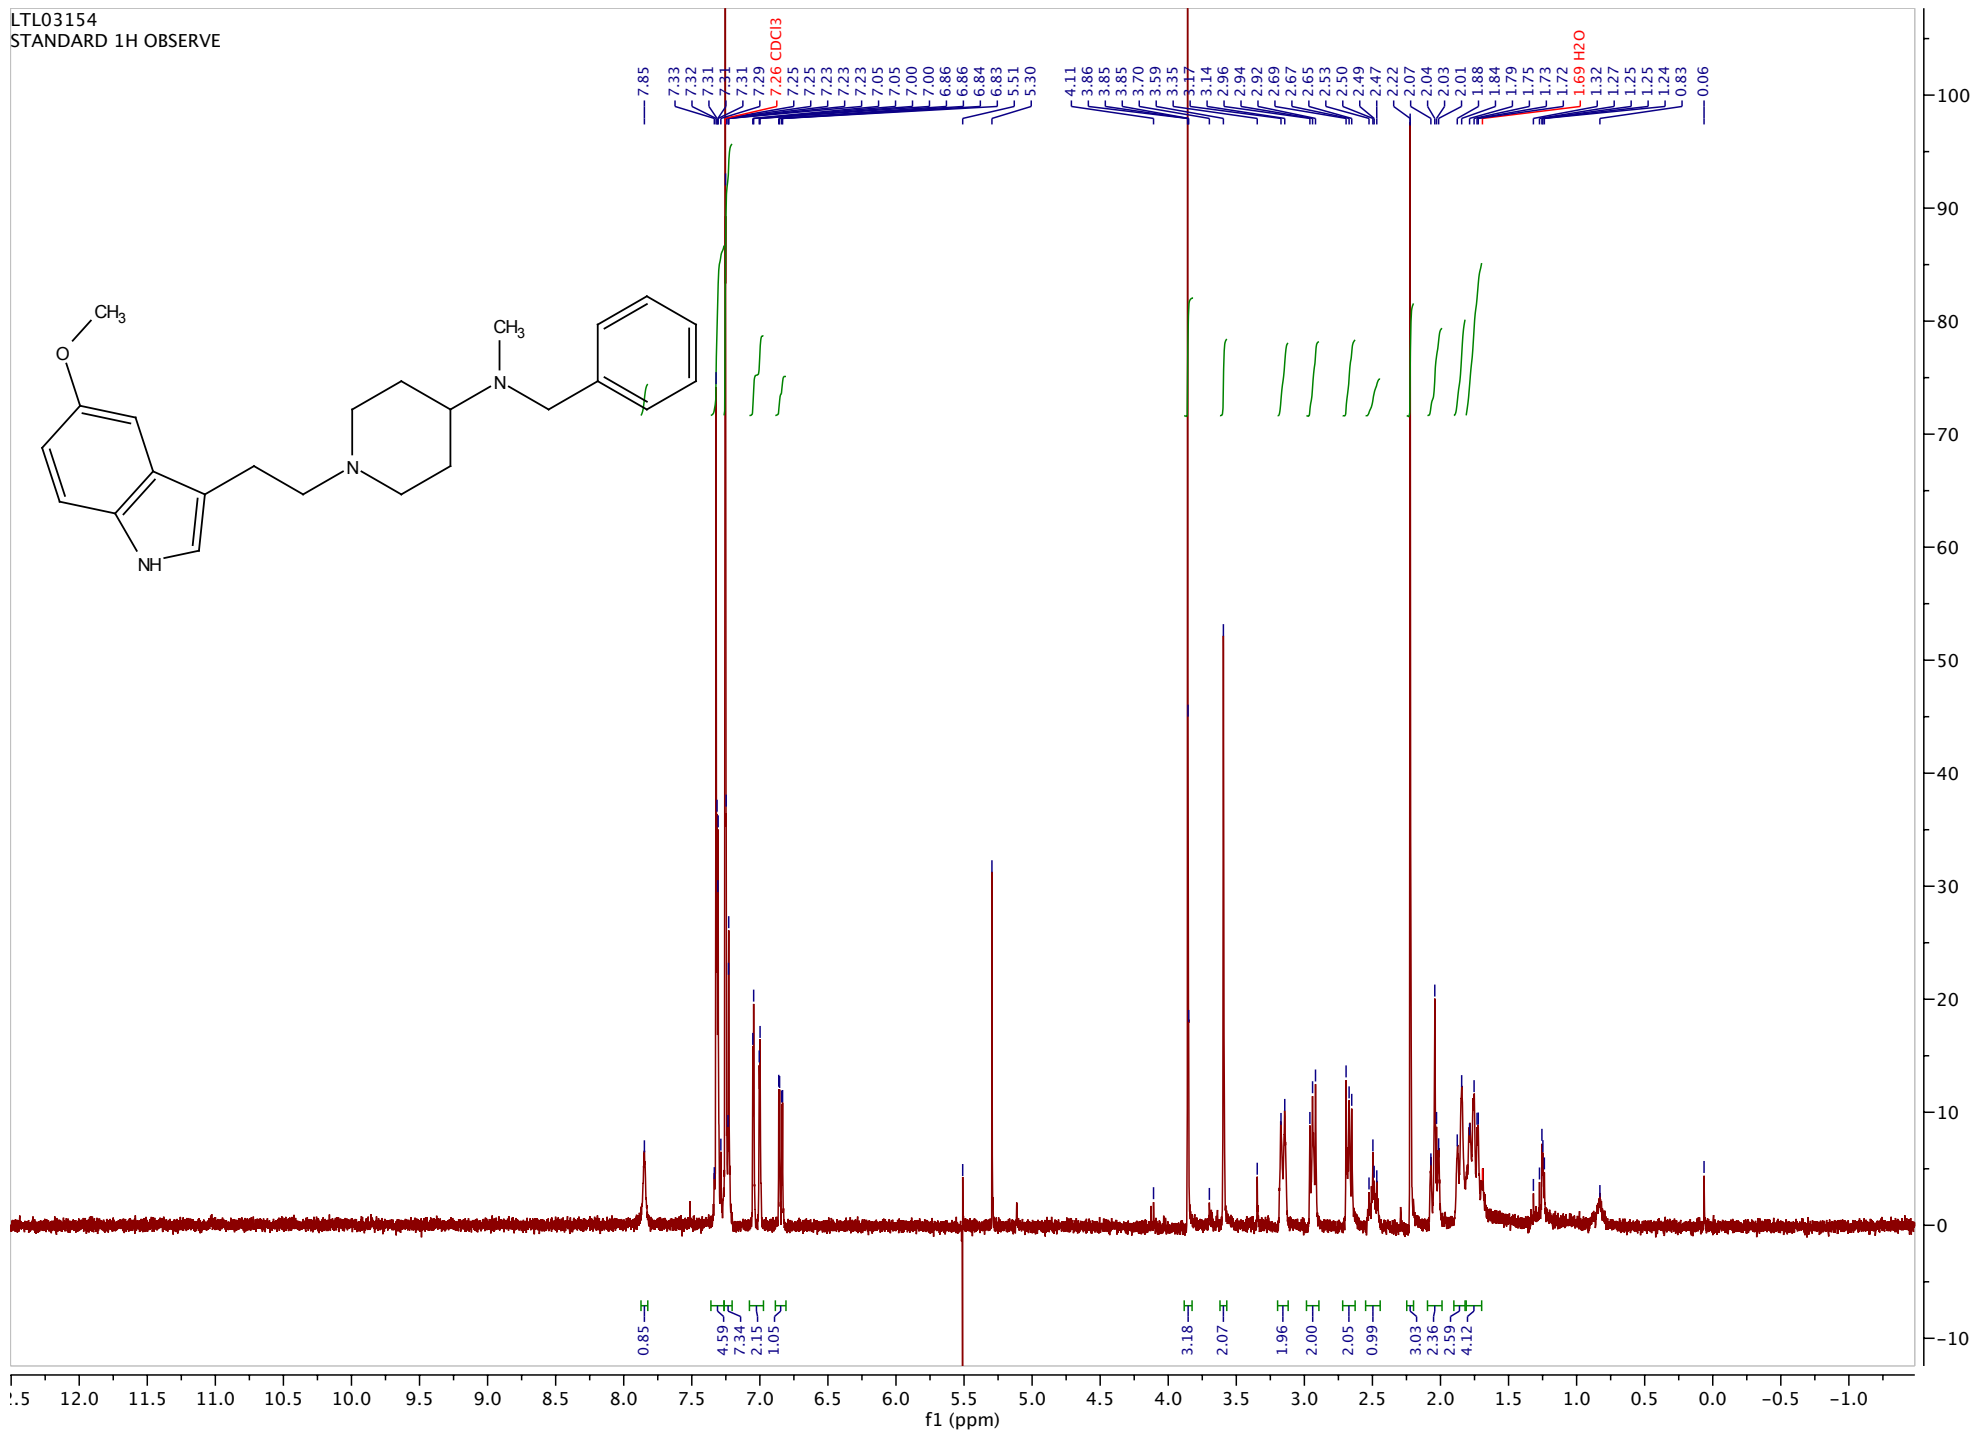

CARBON\_01  
LTL03154\_13C

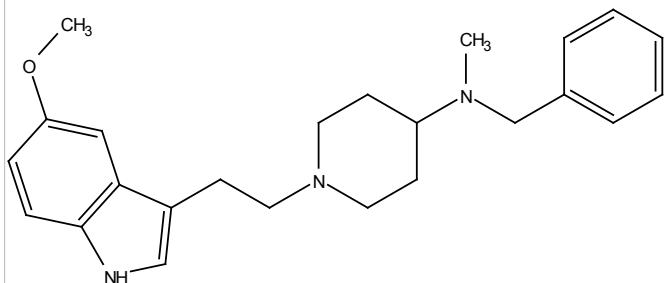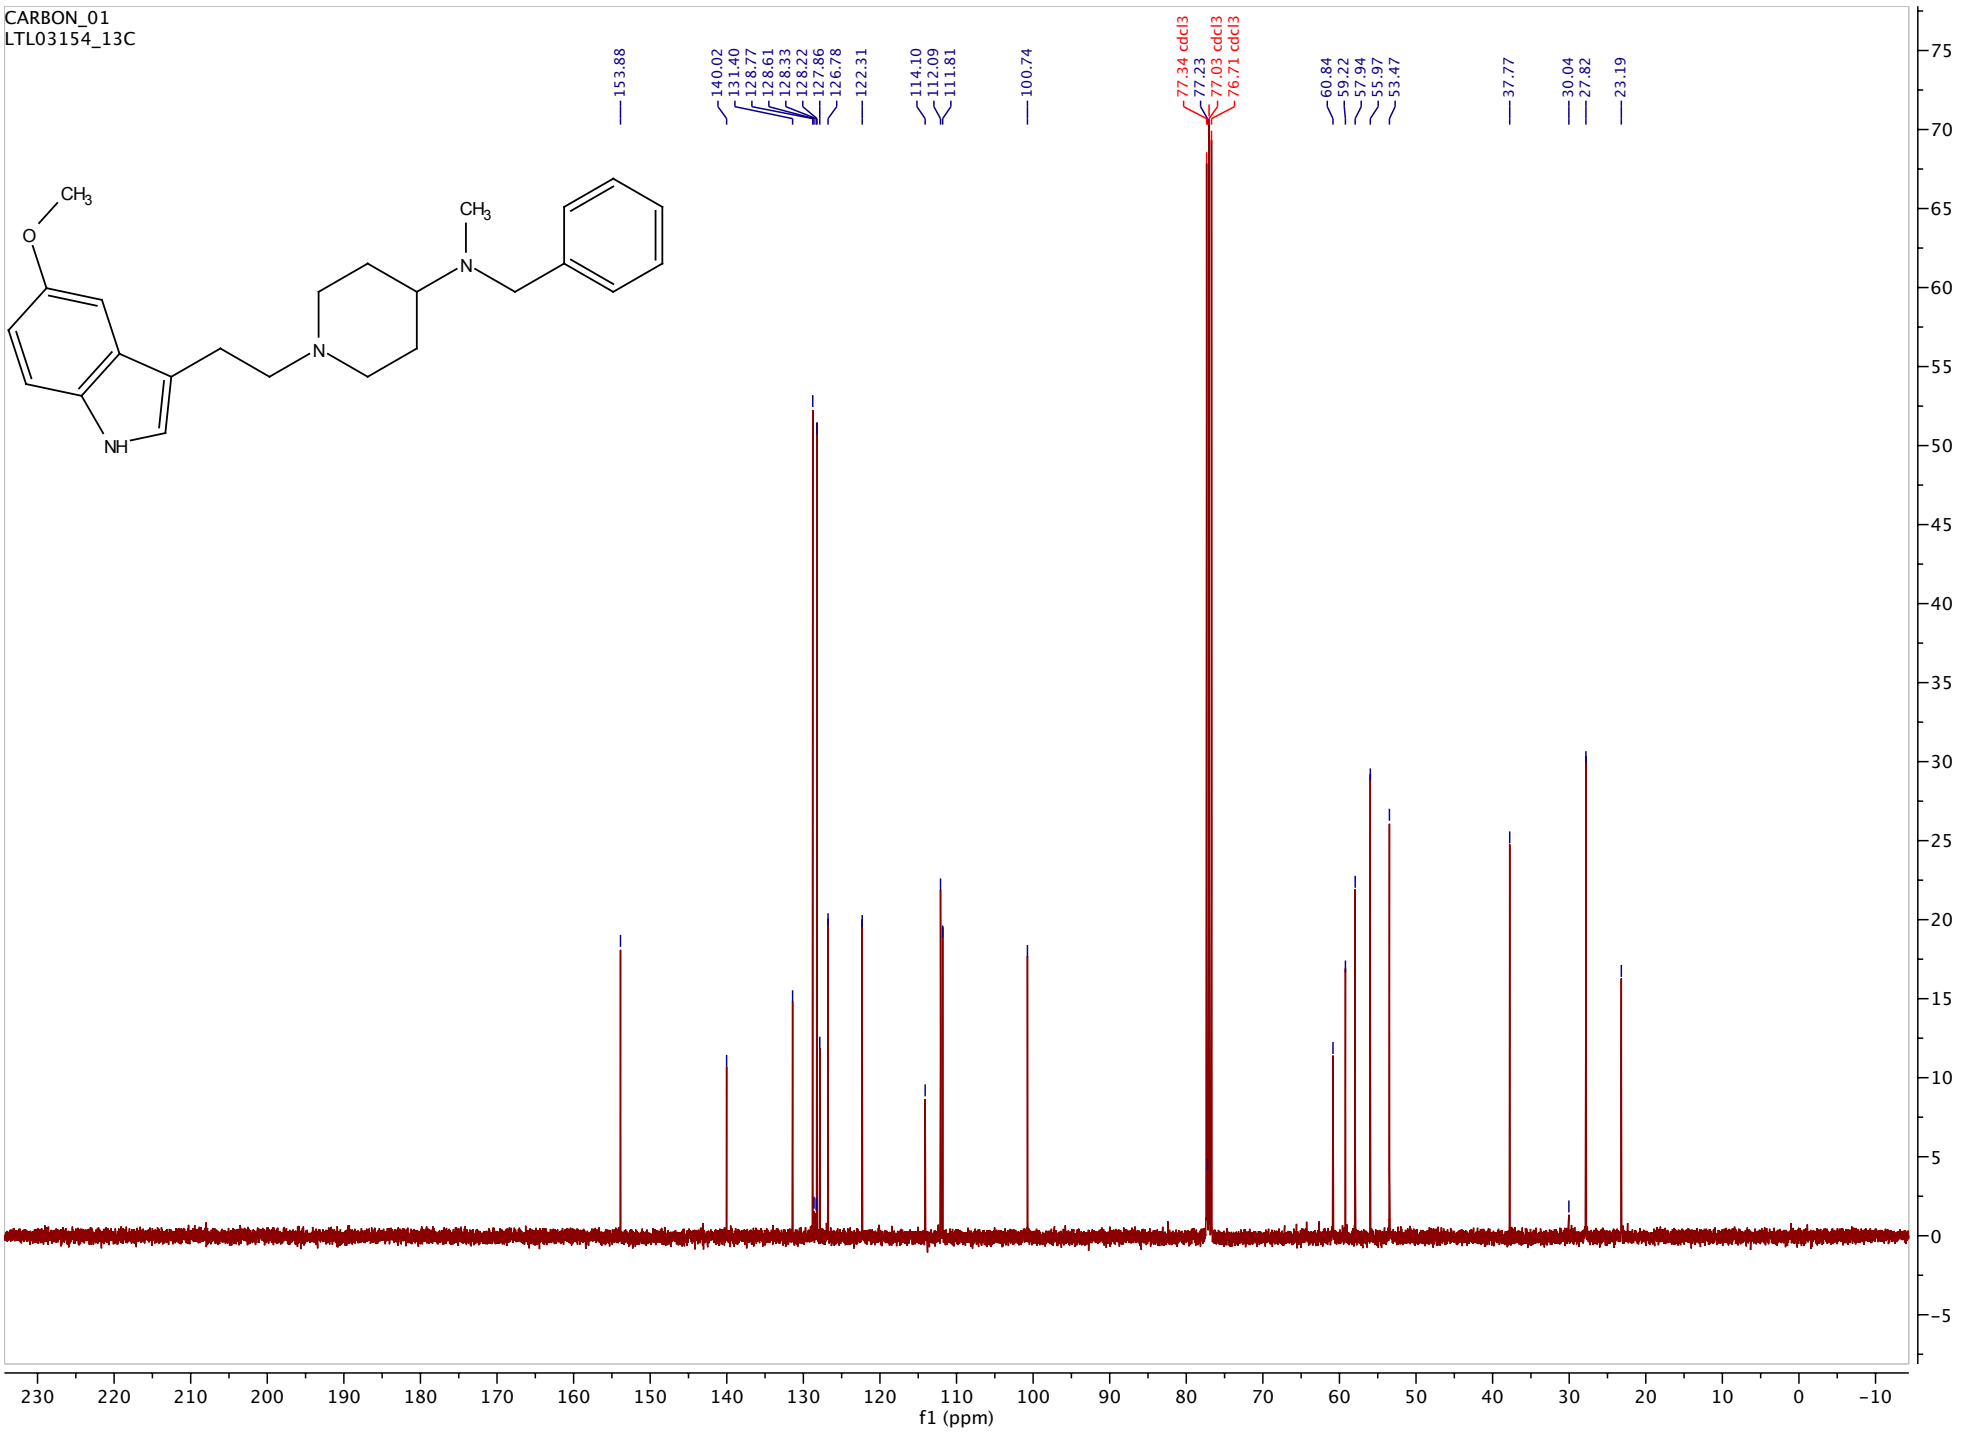

PROTON\_01  
LTL04032

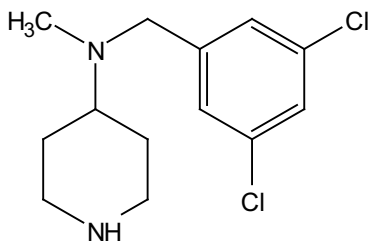

7.26  
7.21  
7.21  
7.21

3.51  
3.17  
3.16  
3.15  
3.14  
3.14  
3.13  
3.12

2.61  
2.60  
2.58  
2.57  
2.55  
2.54  
2.50  
2.18  
1.81  
1.80  
1.79  
1.79  
1.78  
1.78  
1.77  
1.48  
1.47  
1.46  
1.45  
1.45  
1.44

2.74

1.98

1.91

2.94

3.00

3.47

2.08

13 12 11 10 9 8 7 6 5 4 3 2 1 0 -1

f1 (ppm)

2000  
1900  
1800  
1700  
1600  
1500  
1400  
1300  
1200  
1100  
1000  
900  
800  
700  
600  
500  
400  
300  
200  
100  
0  
-100



PROTON\_01  
LTL04031

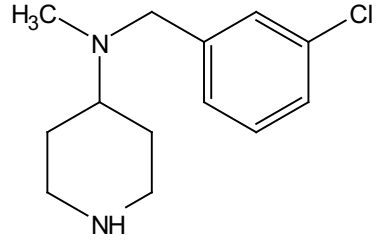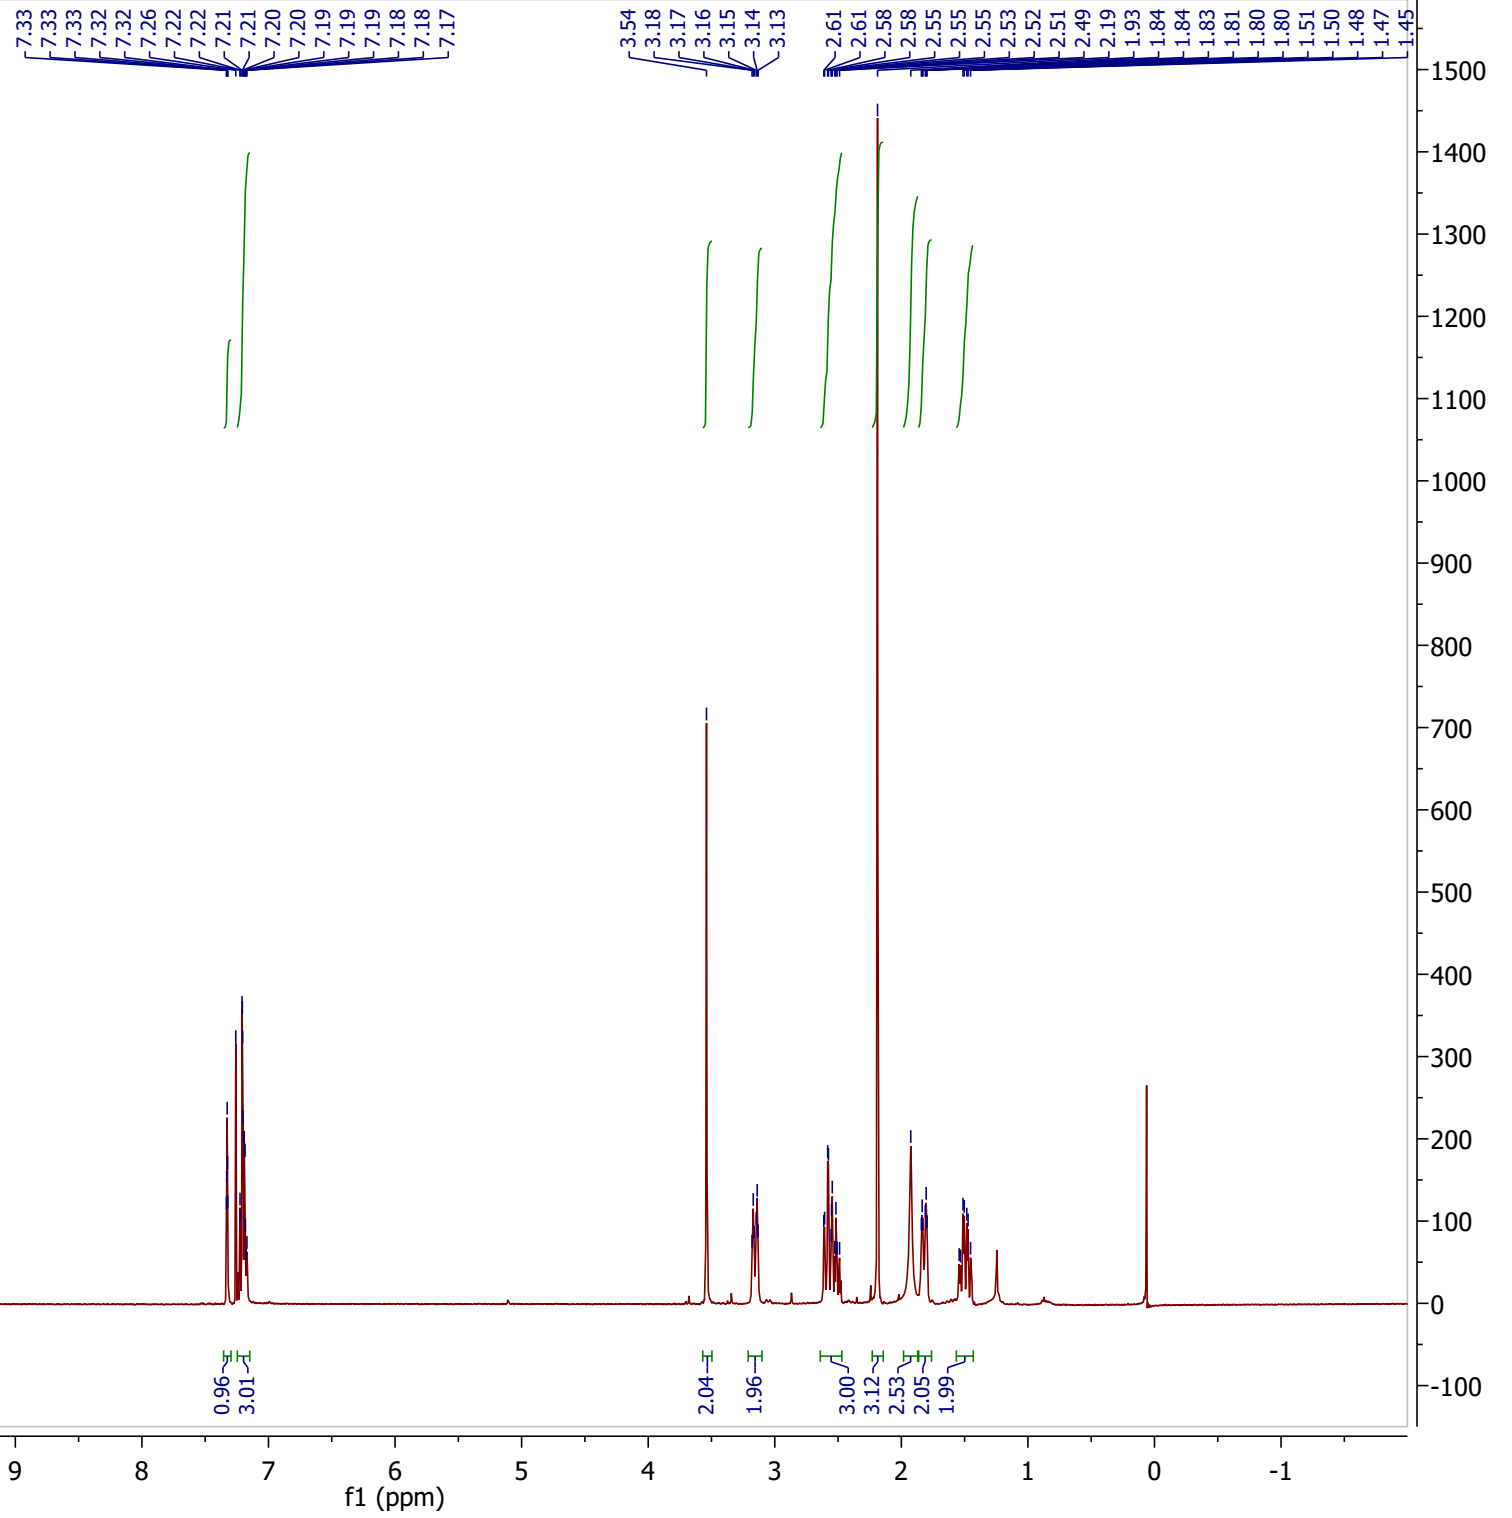

CARBON\_01  
LTL04031\_13C

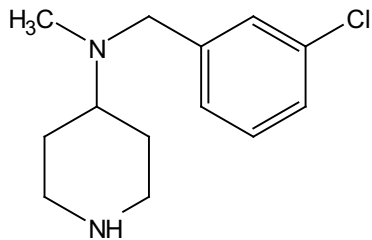

142.50  
134.12  
129.40  
128.61  
126.90  
126.68

61.21  
57.24

46.33

37.64

29.32

1.00

230 220 210 200 190 180 170 160 150 140 130 120 110 100 90 80 70 60 50 40 30 20 10 0 -10

f1 (ppm)

140  
130  
120  
110  
100  
90  
80  
70  
60  
50  
40  
30  
20  
10  
0  
-10

PROTON\_01  
LTL04029

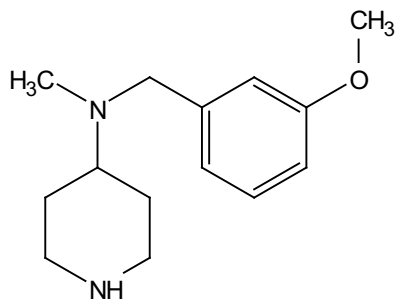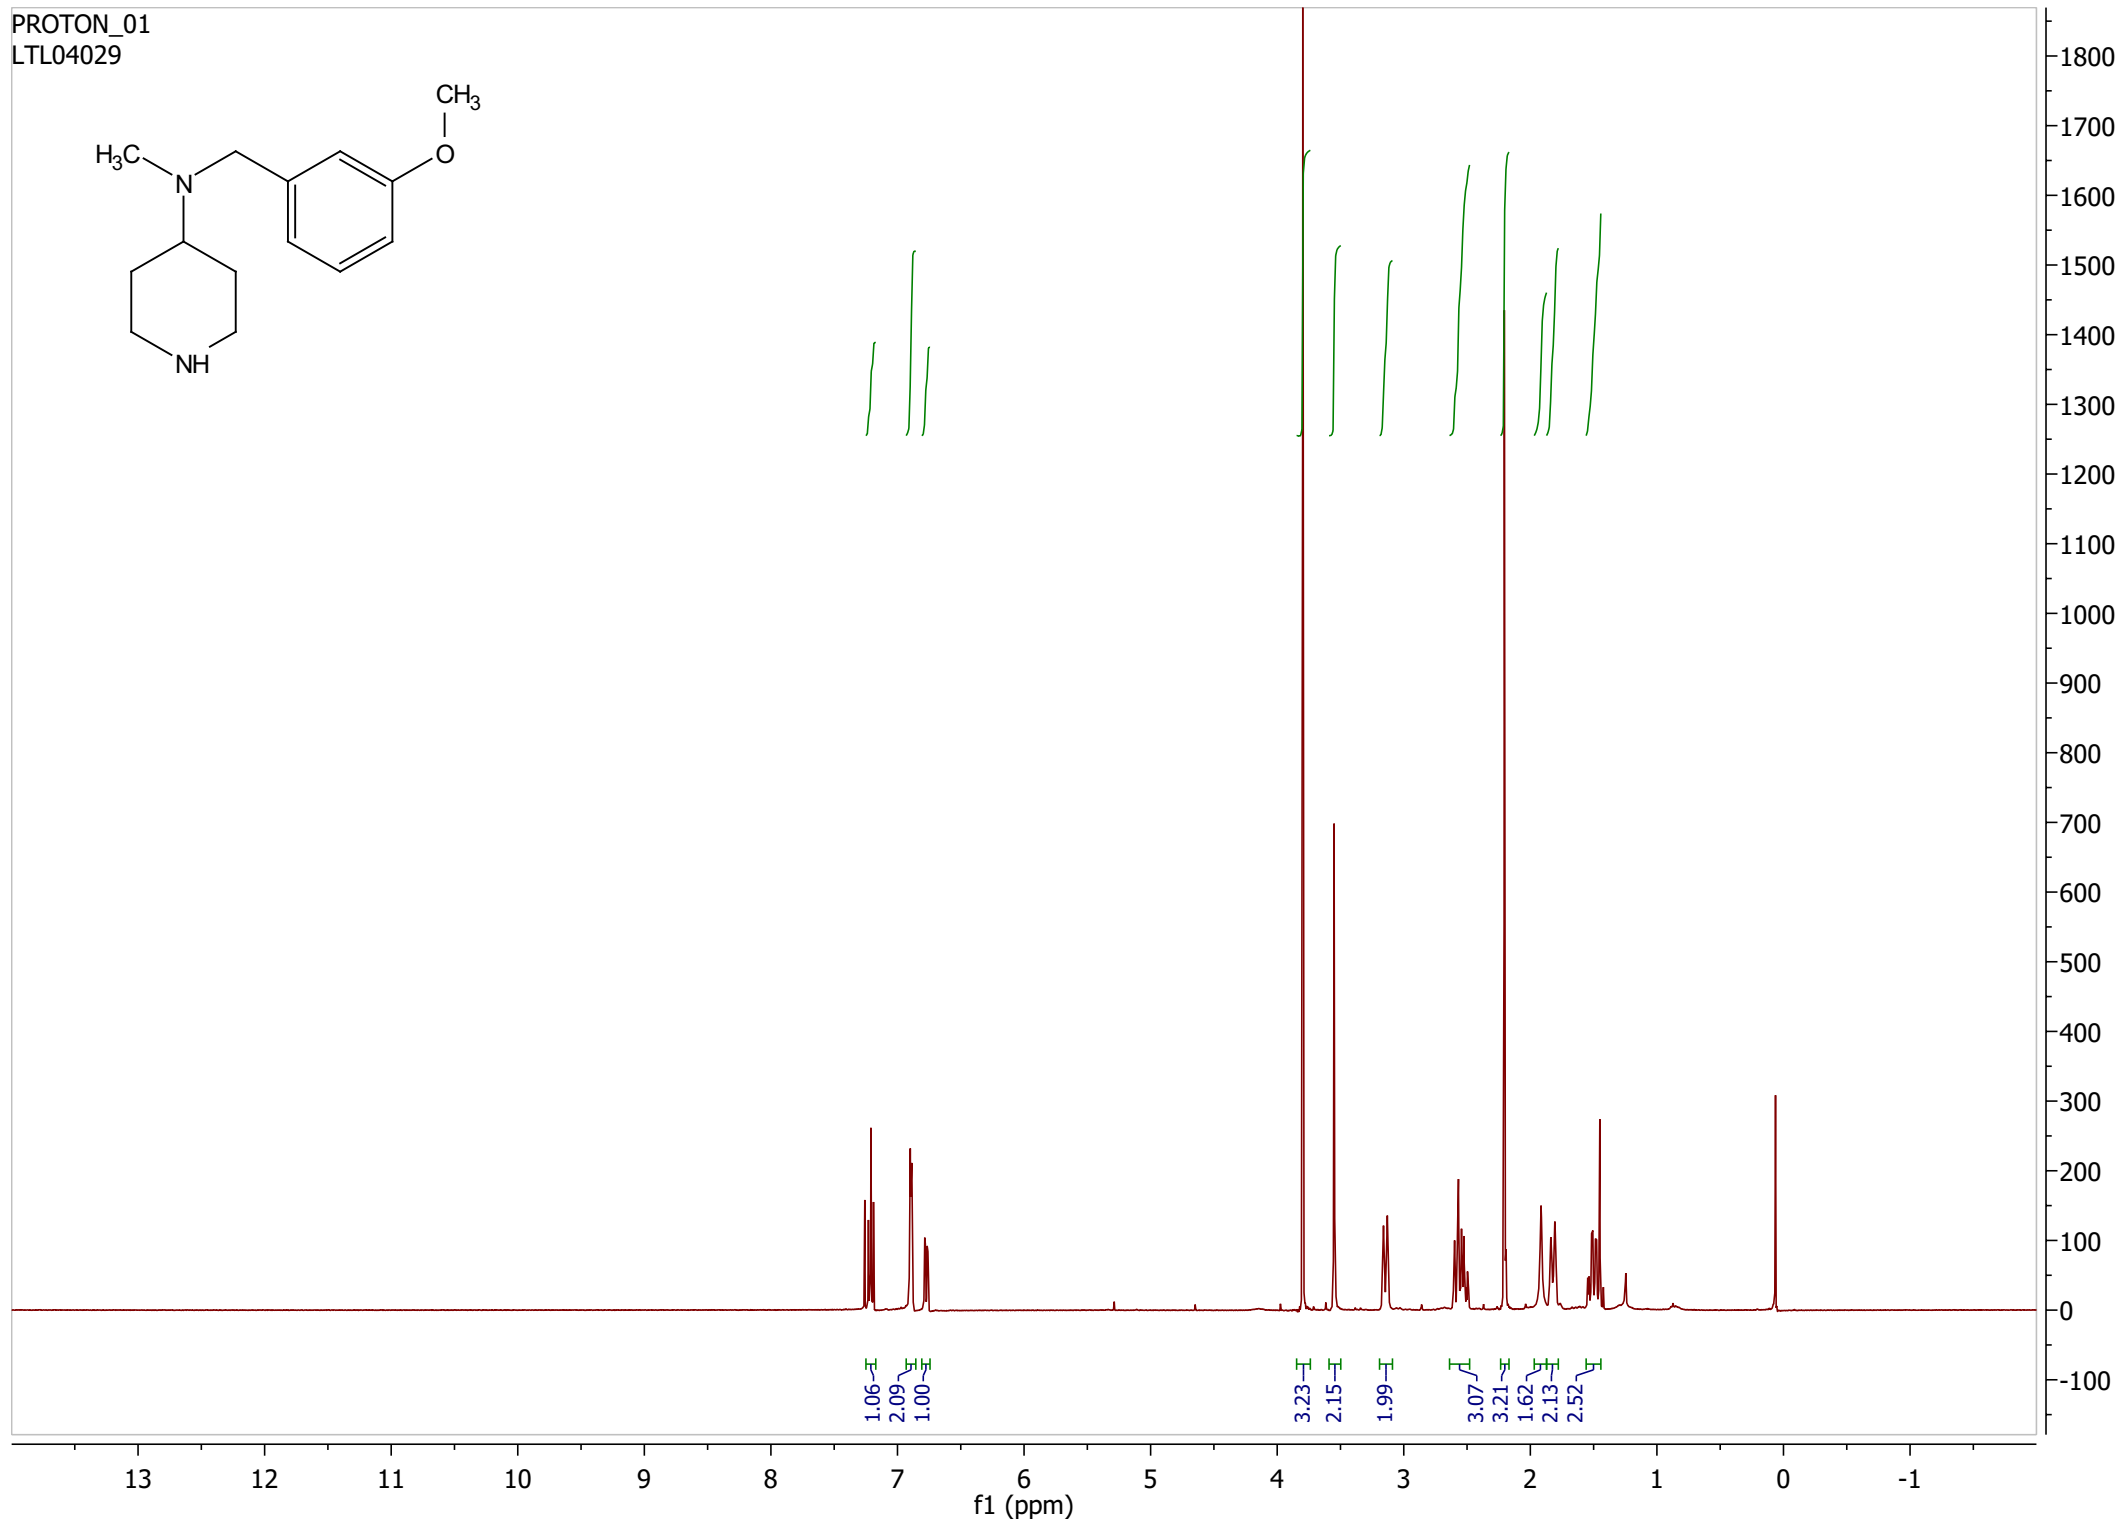

CARBON\_01  
LTL04029

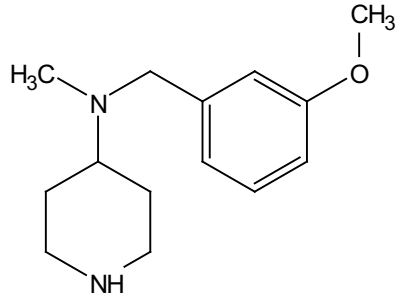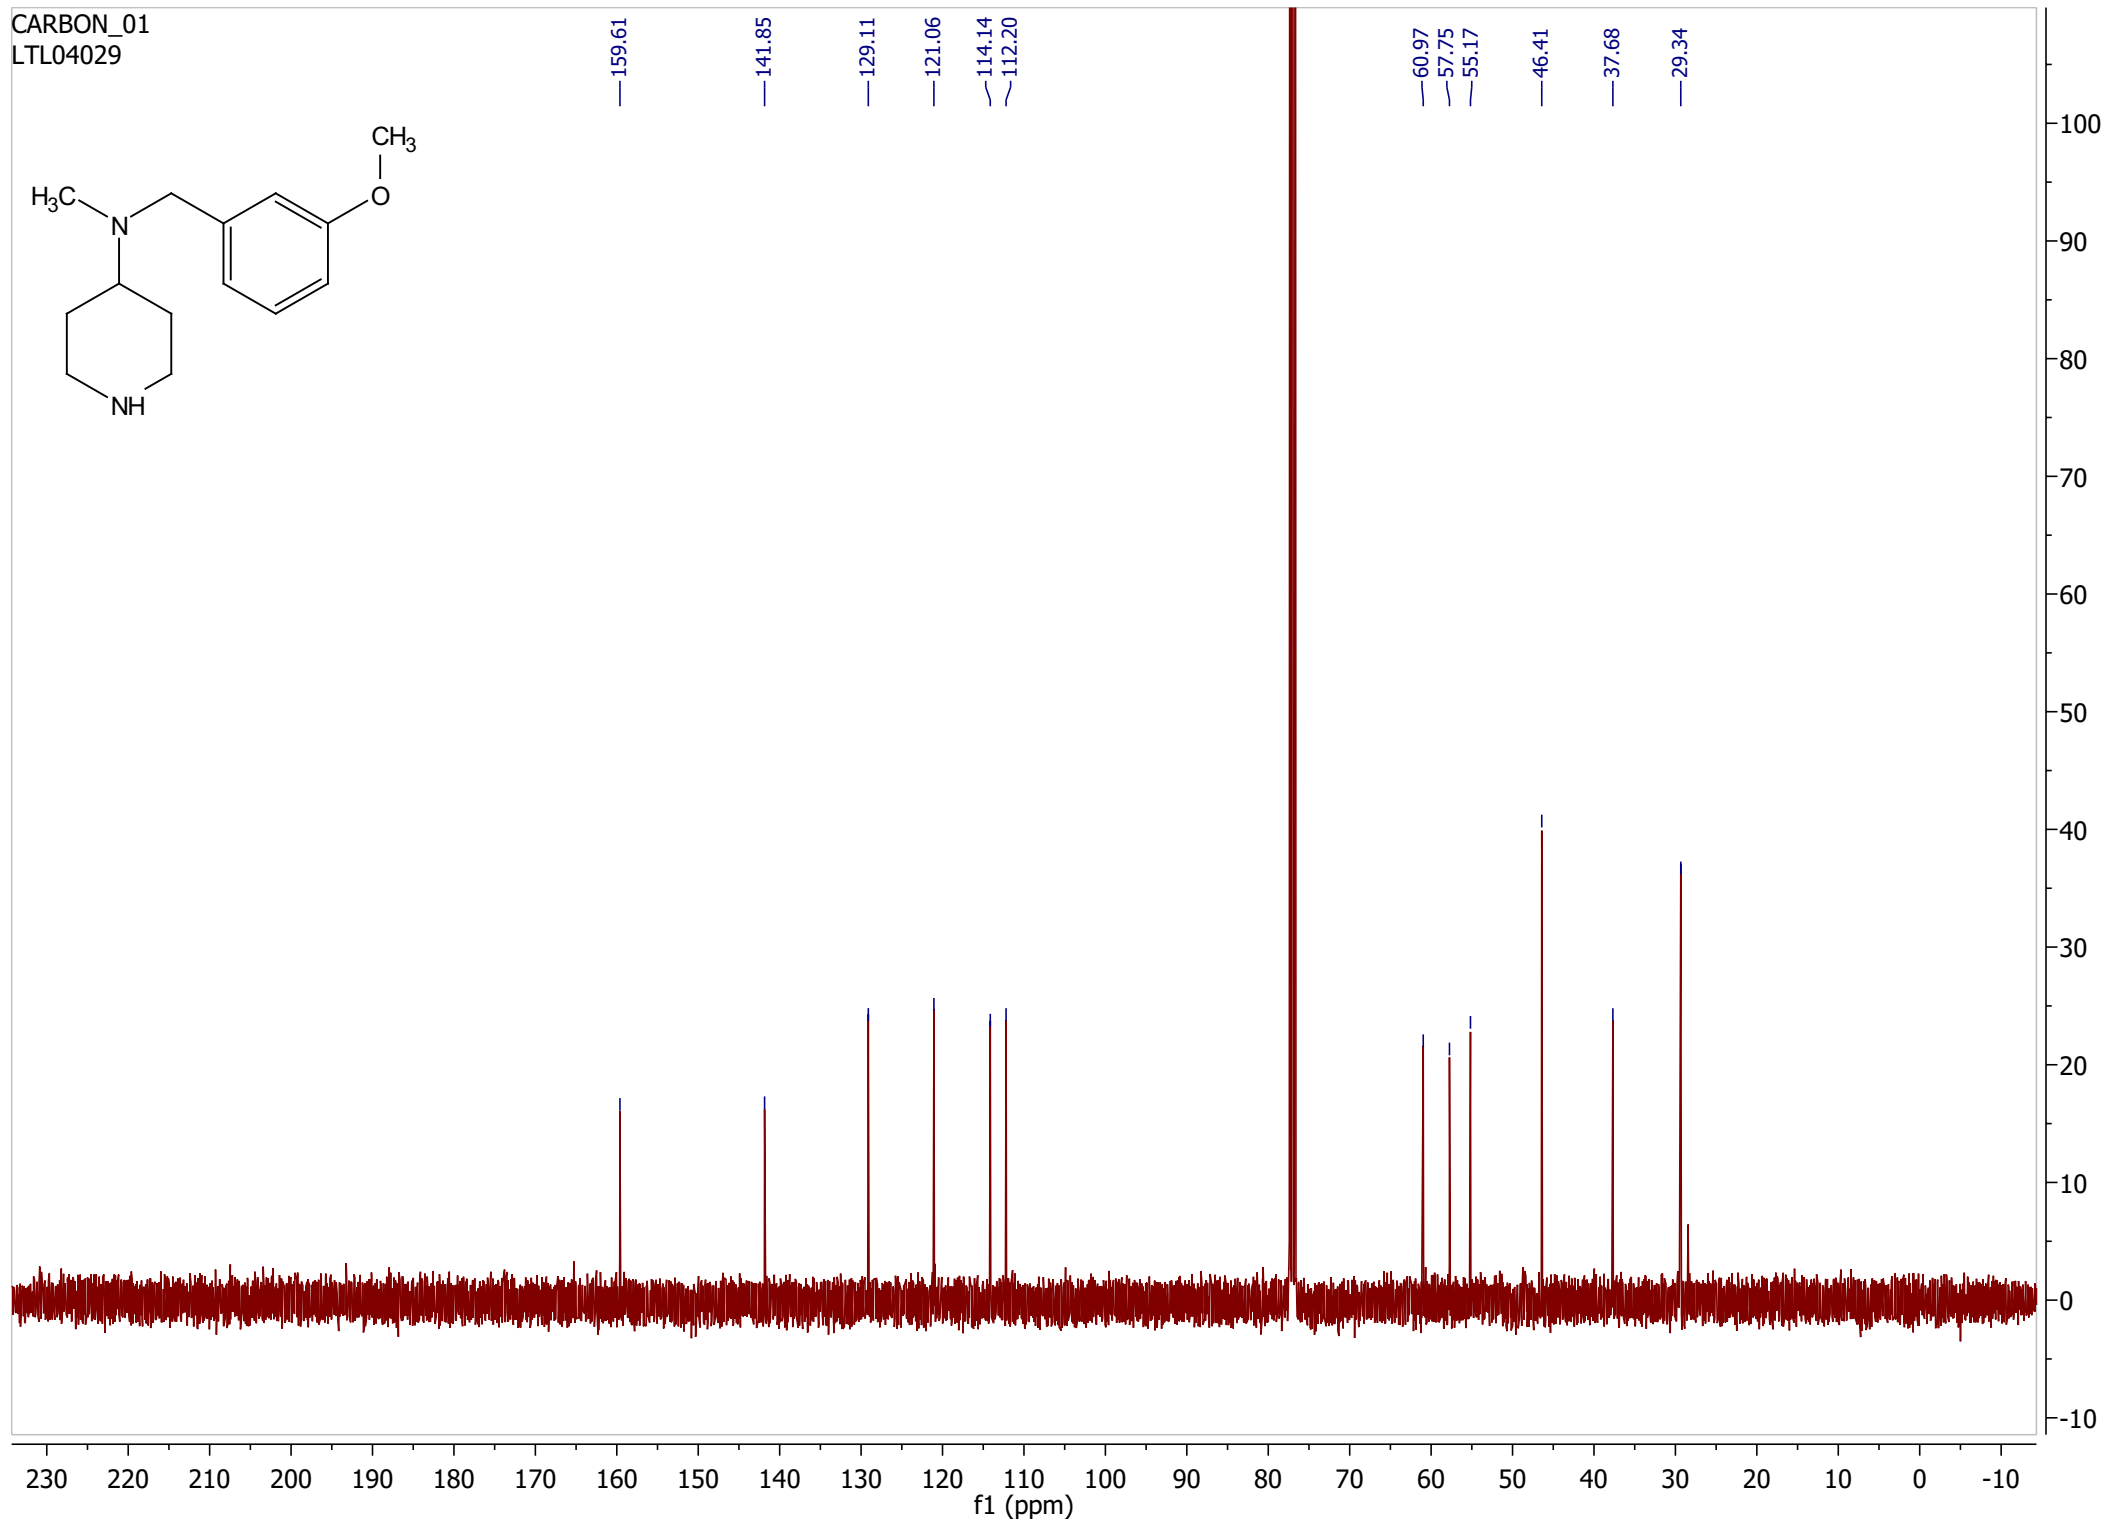

PROTON\_01  
LTL04034

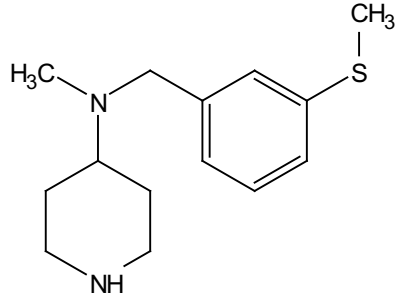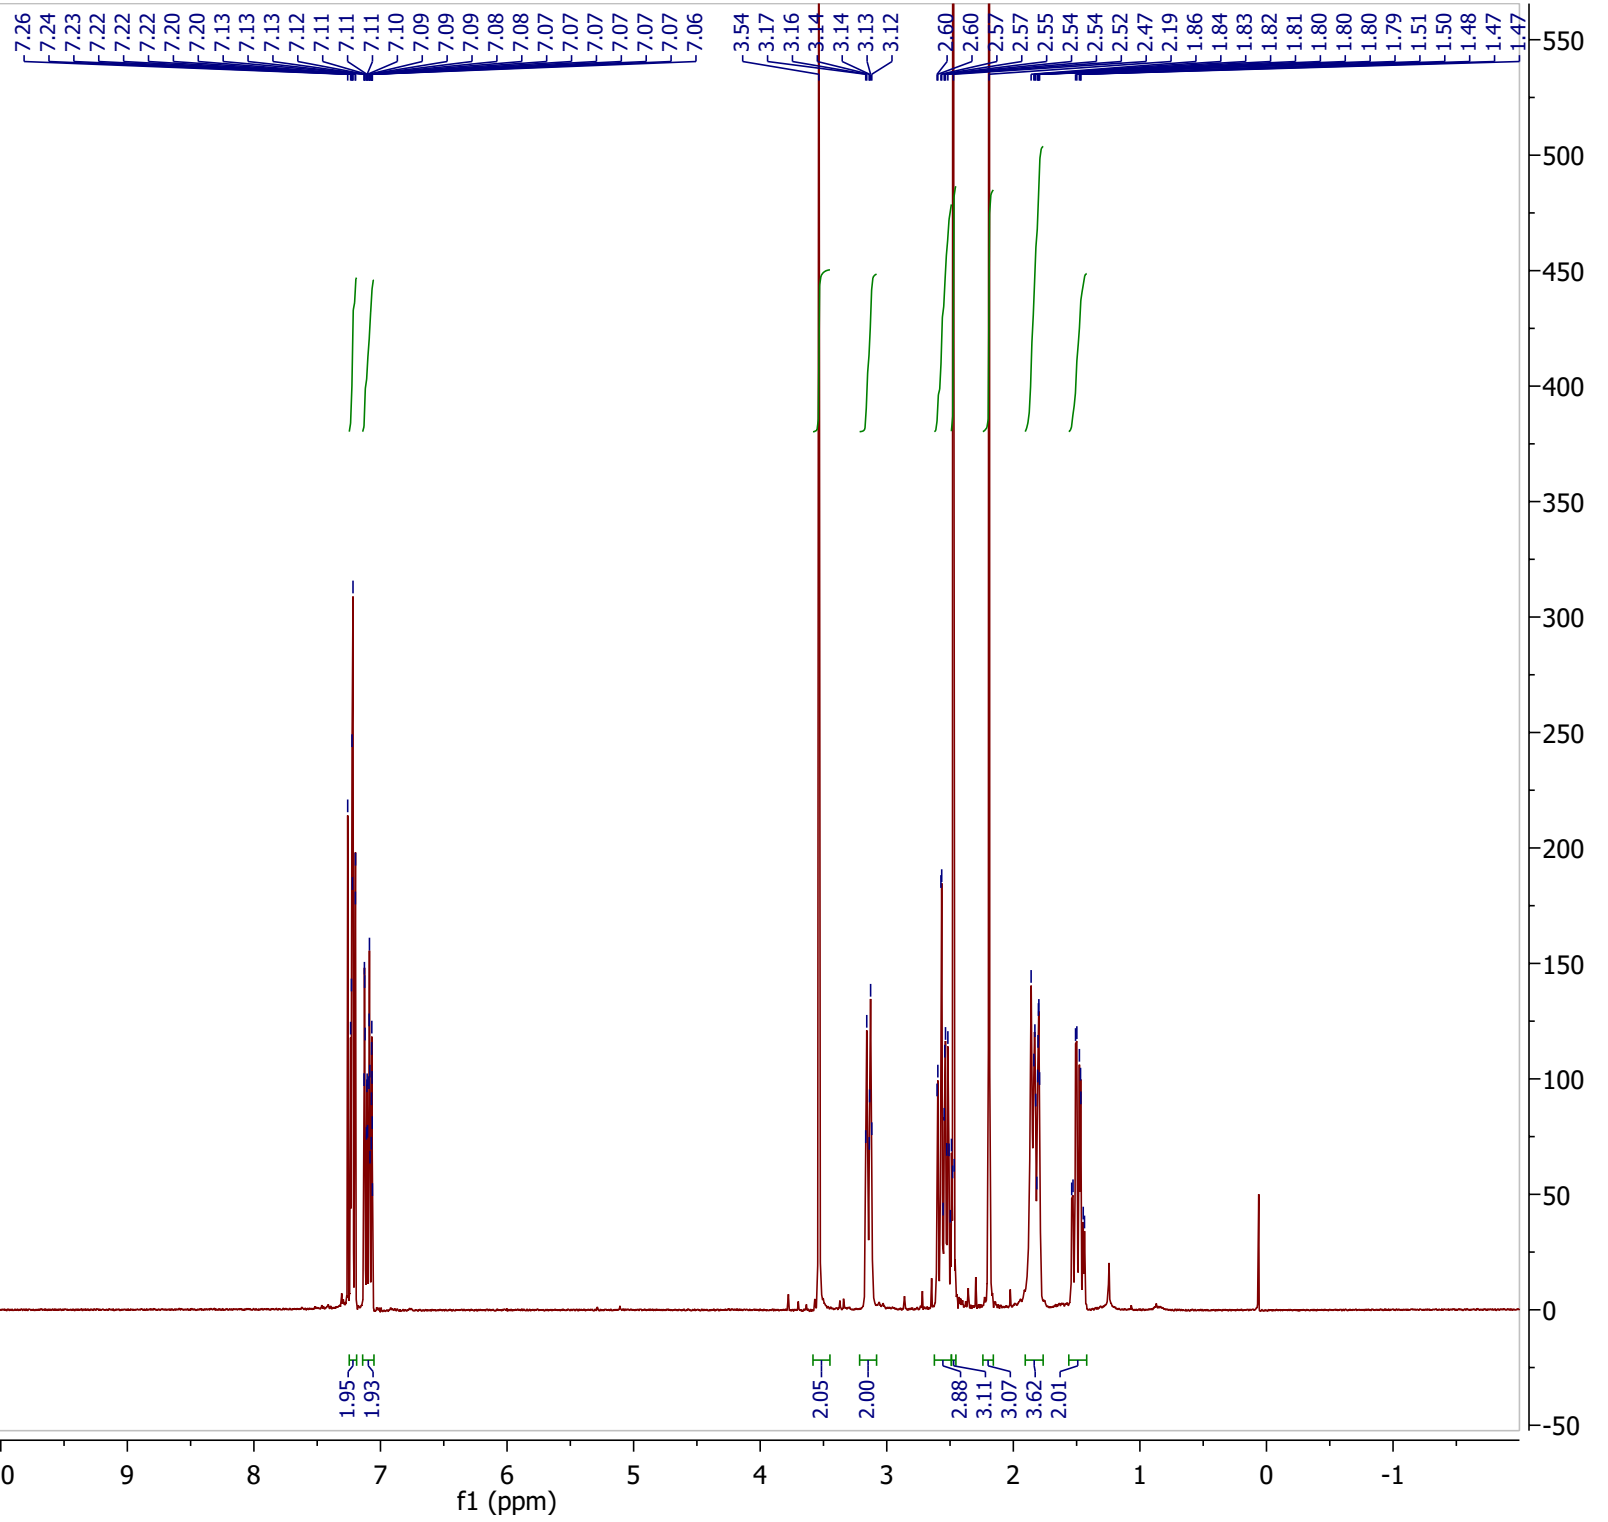

CARBON\_01  
LTL04034\_13C

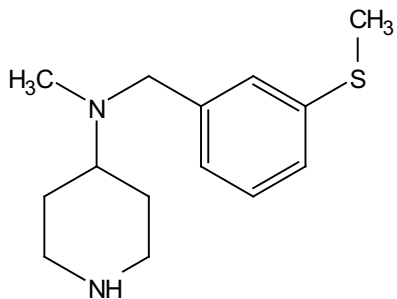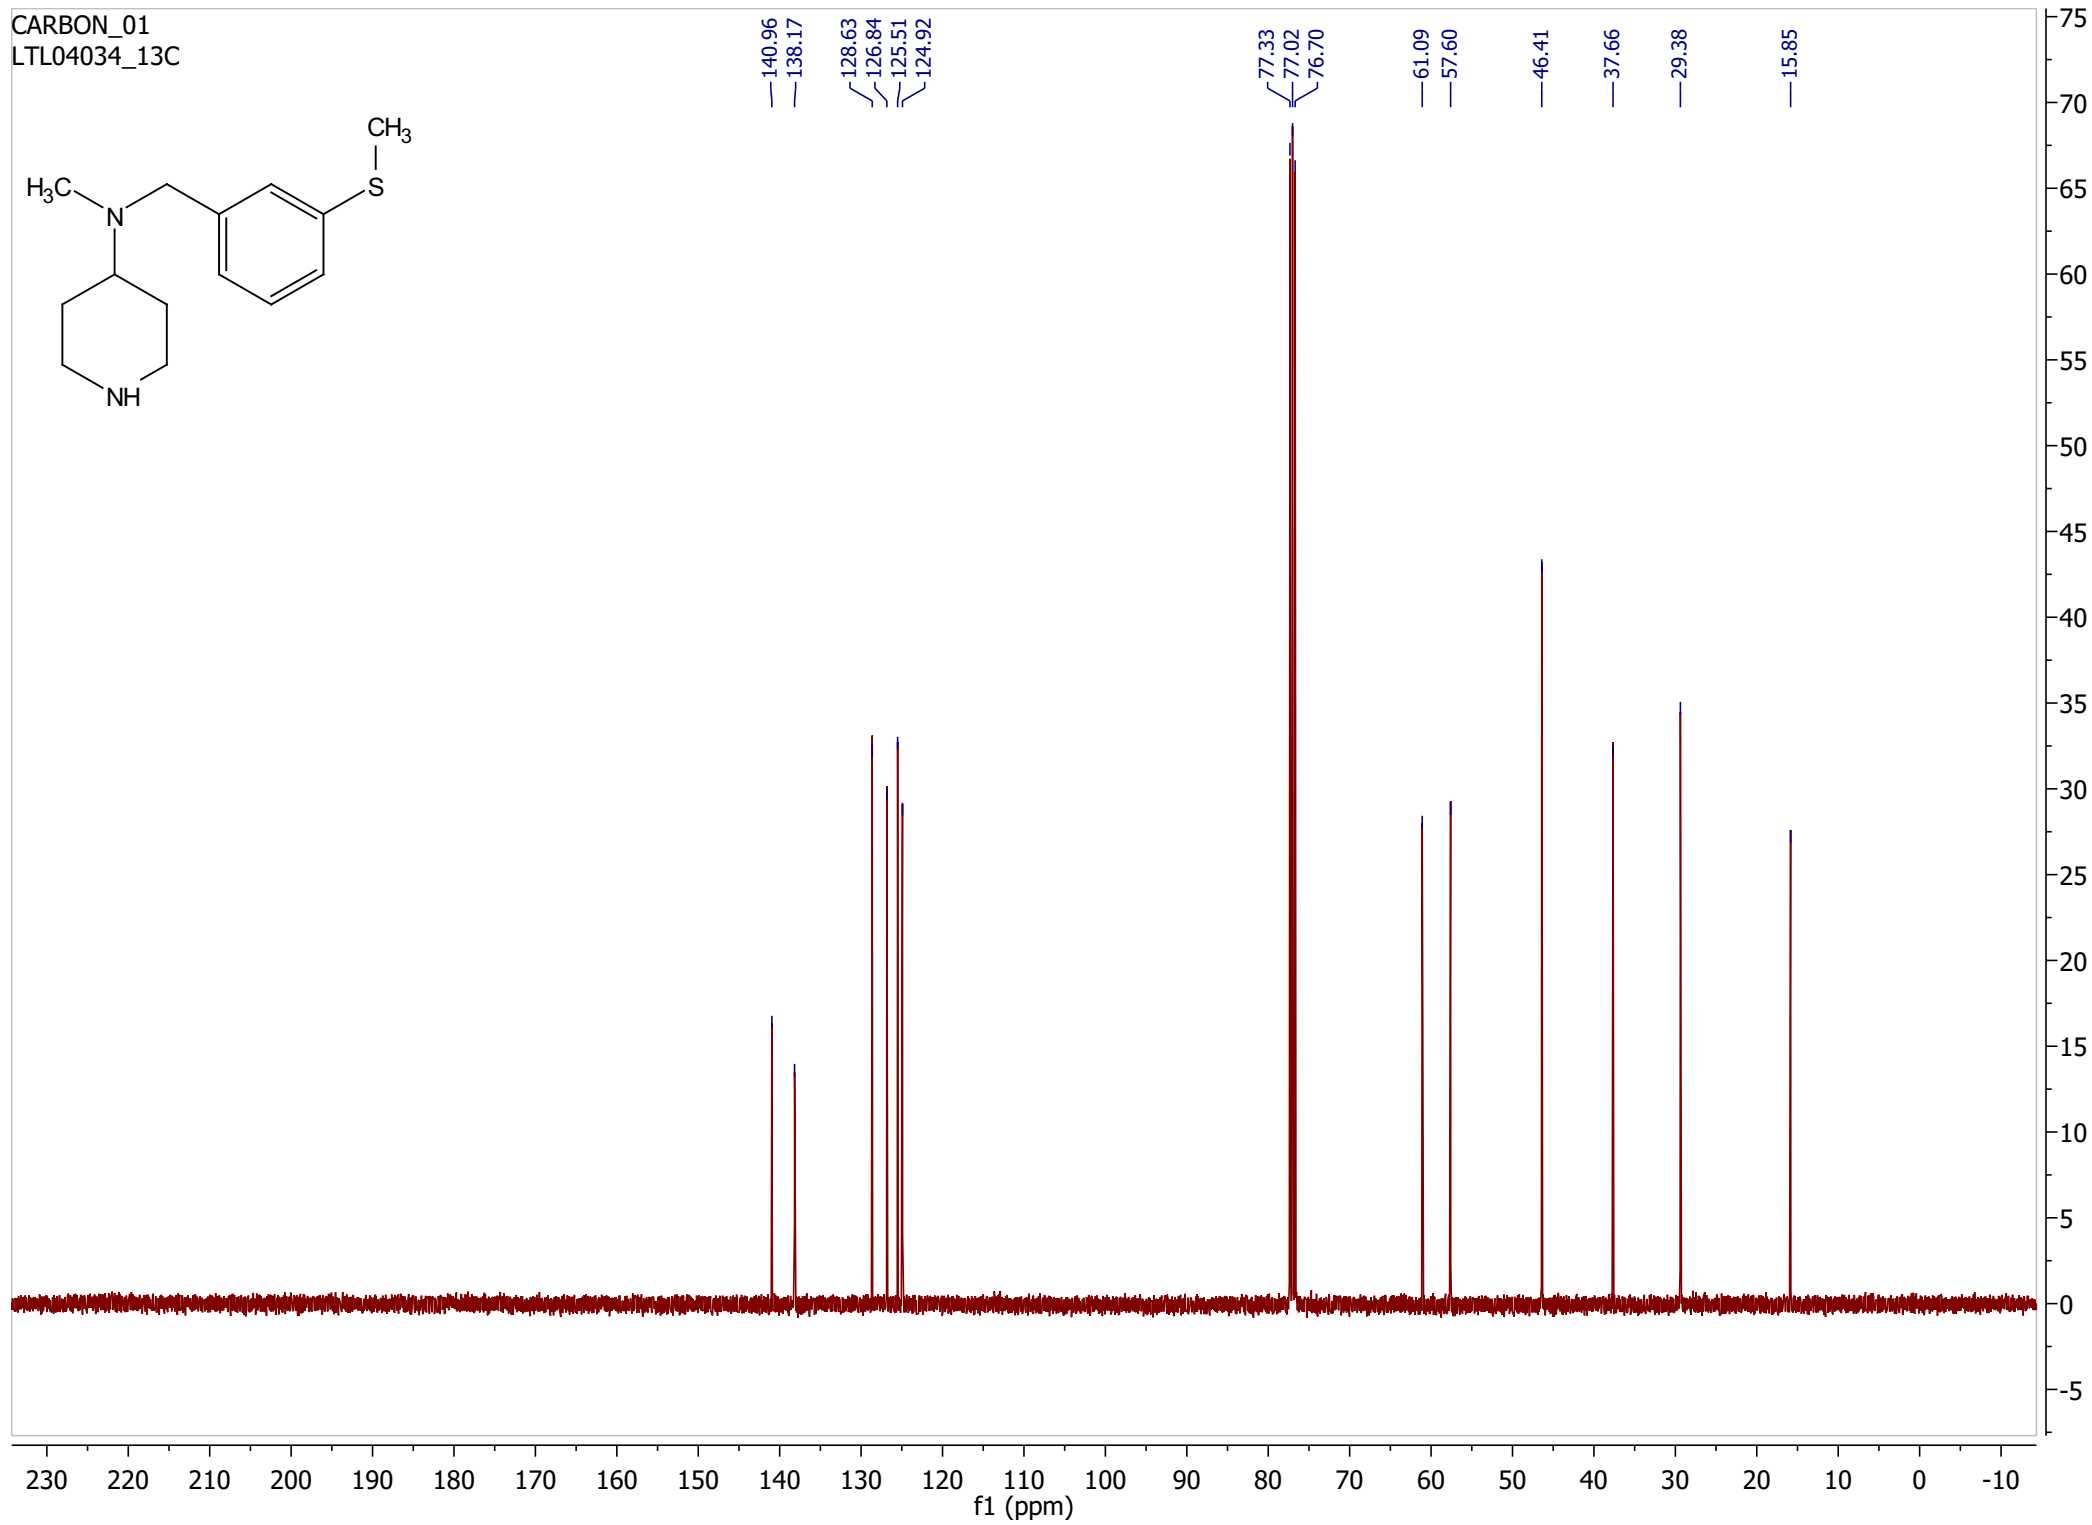

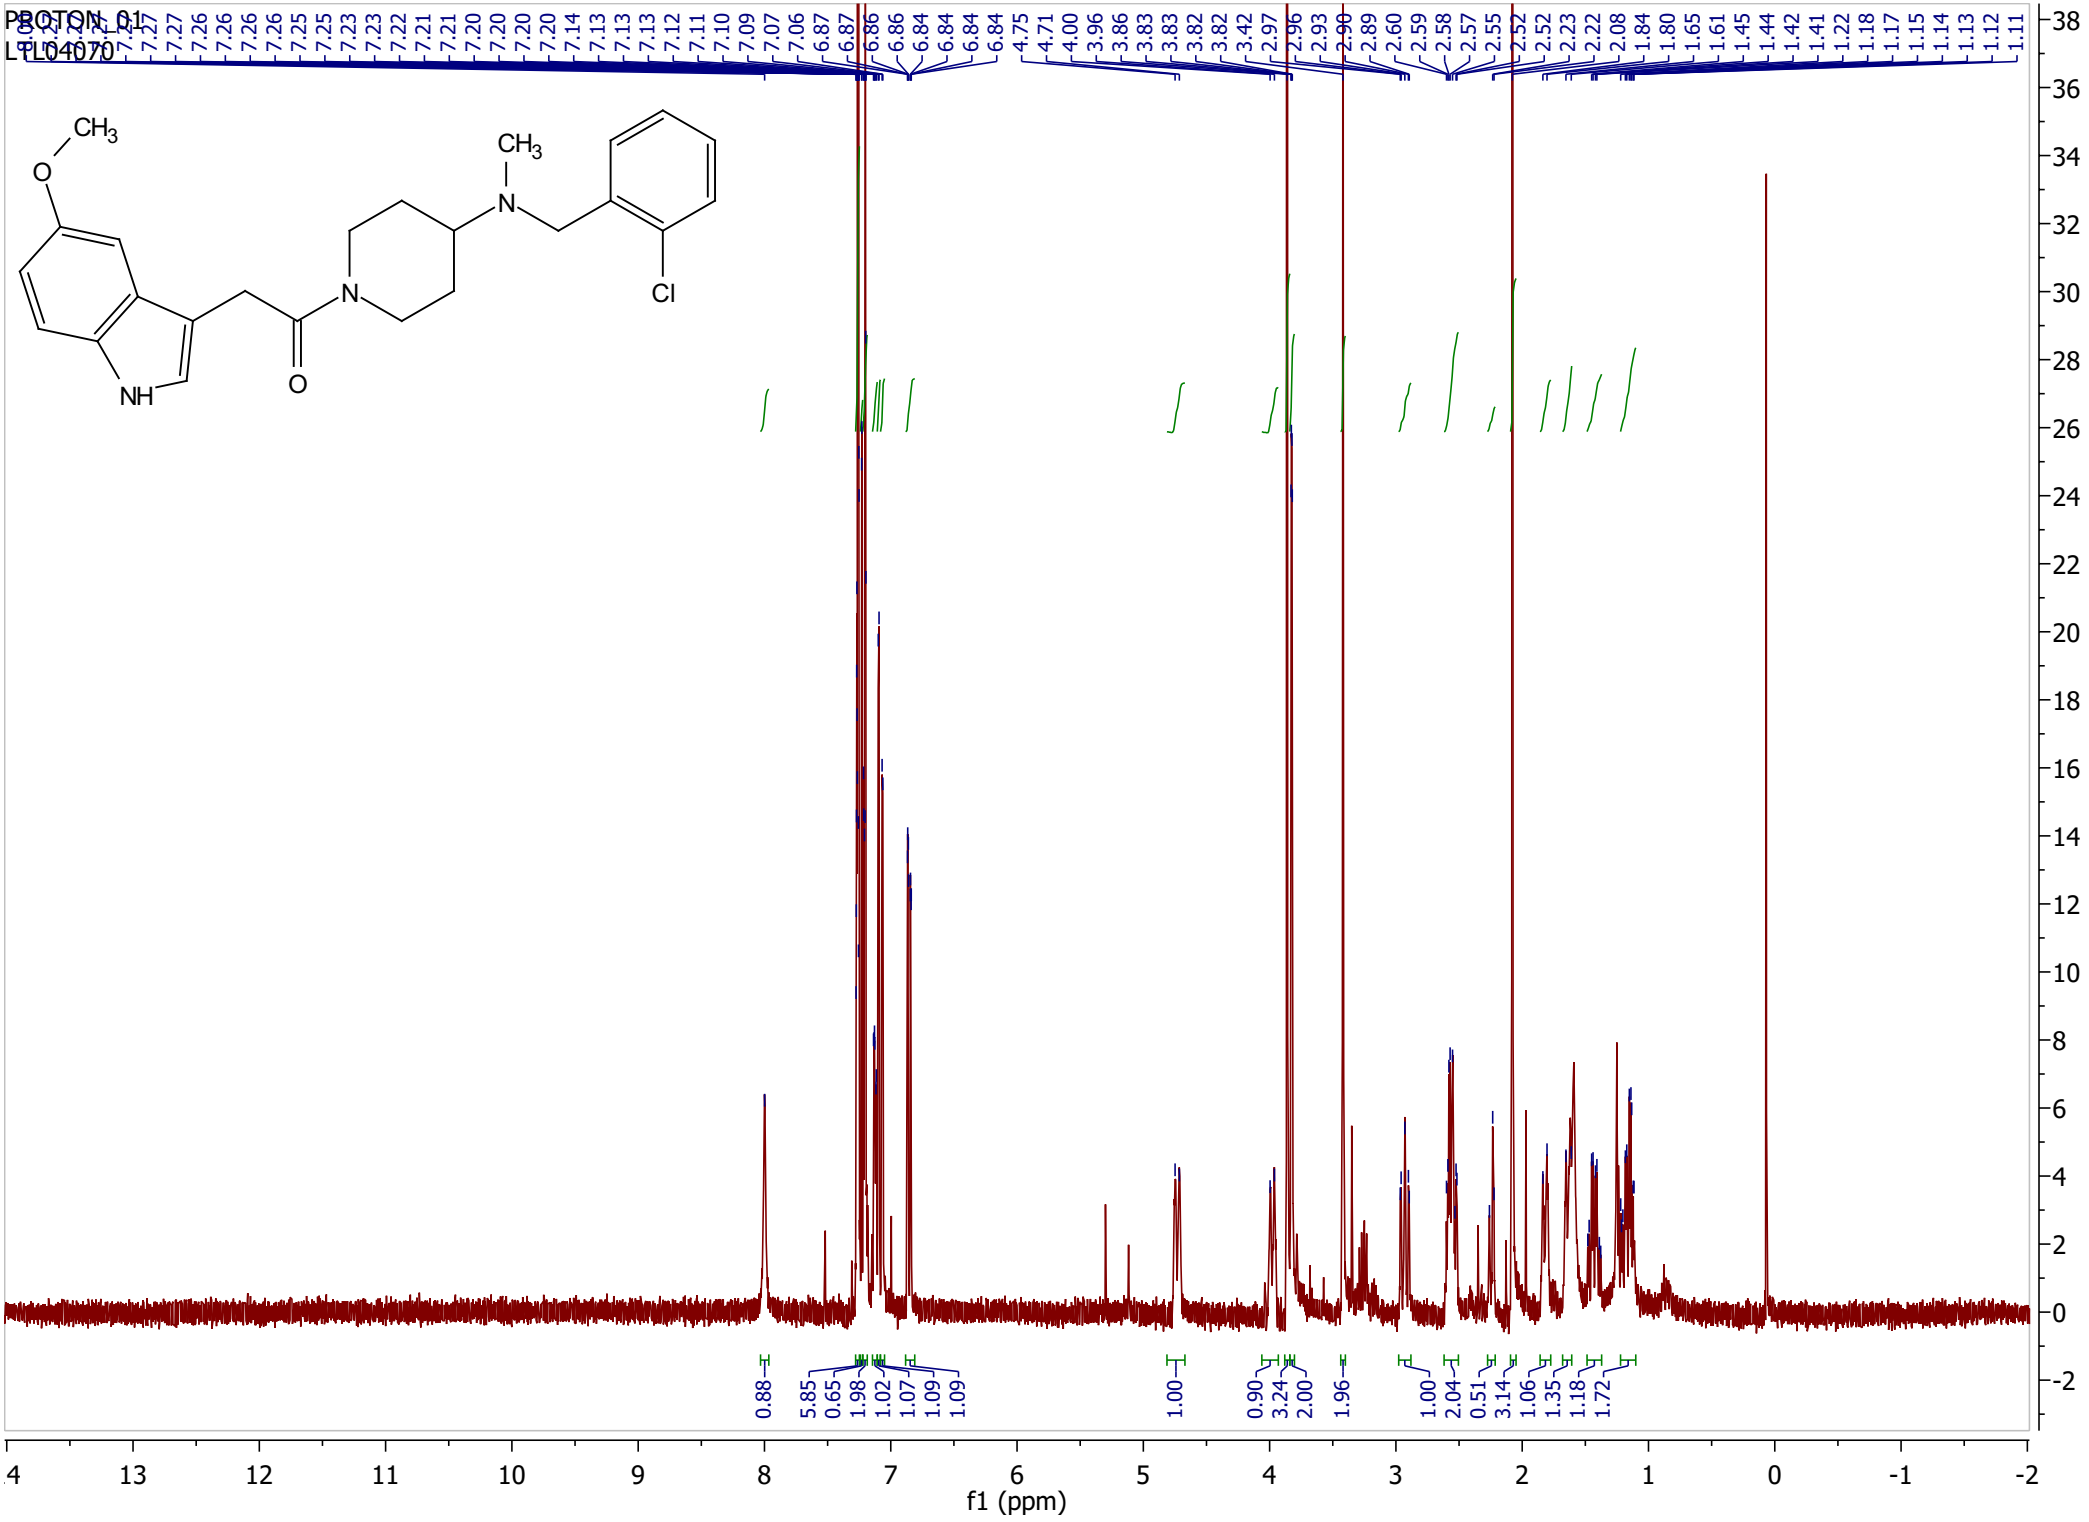

CARBON\_01  
LTL04070

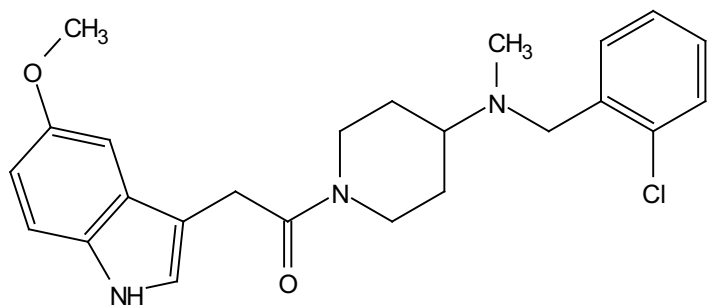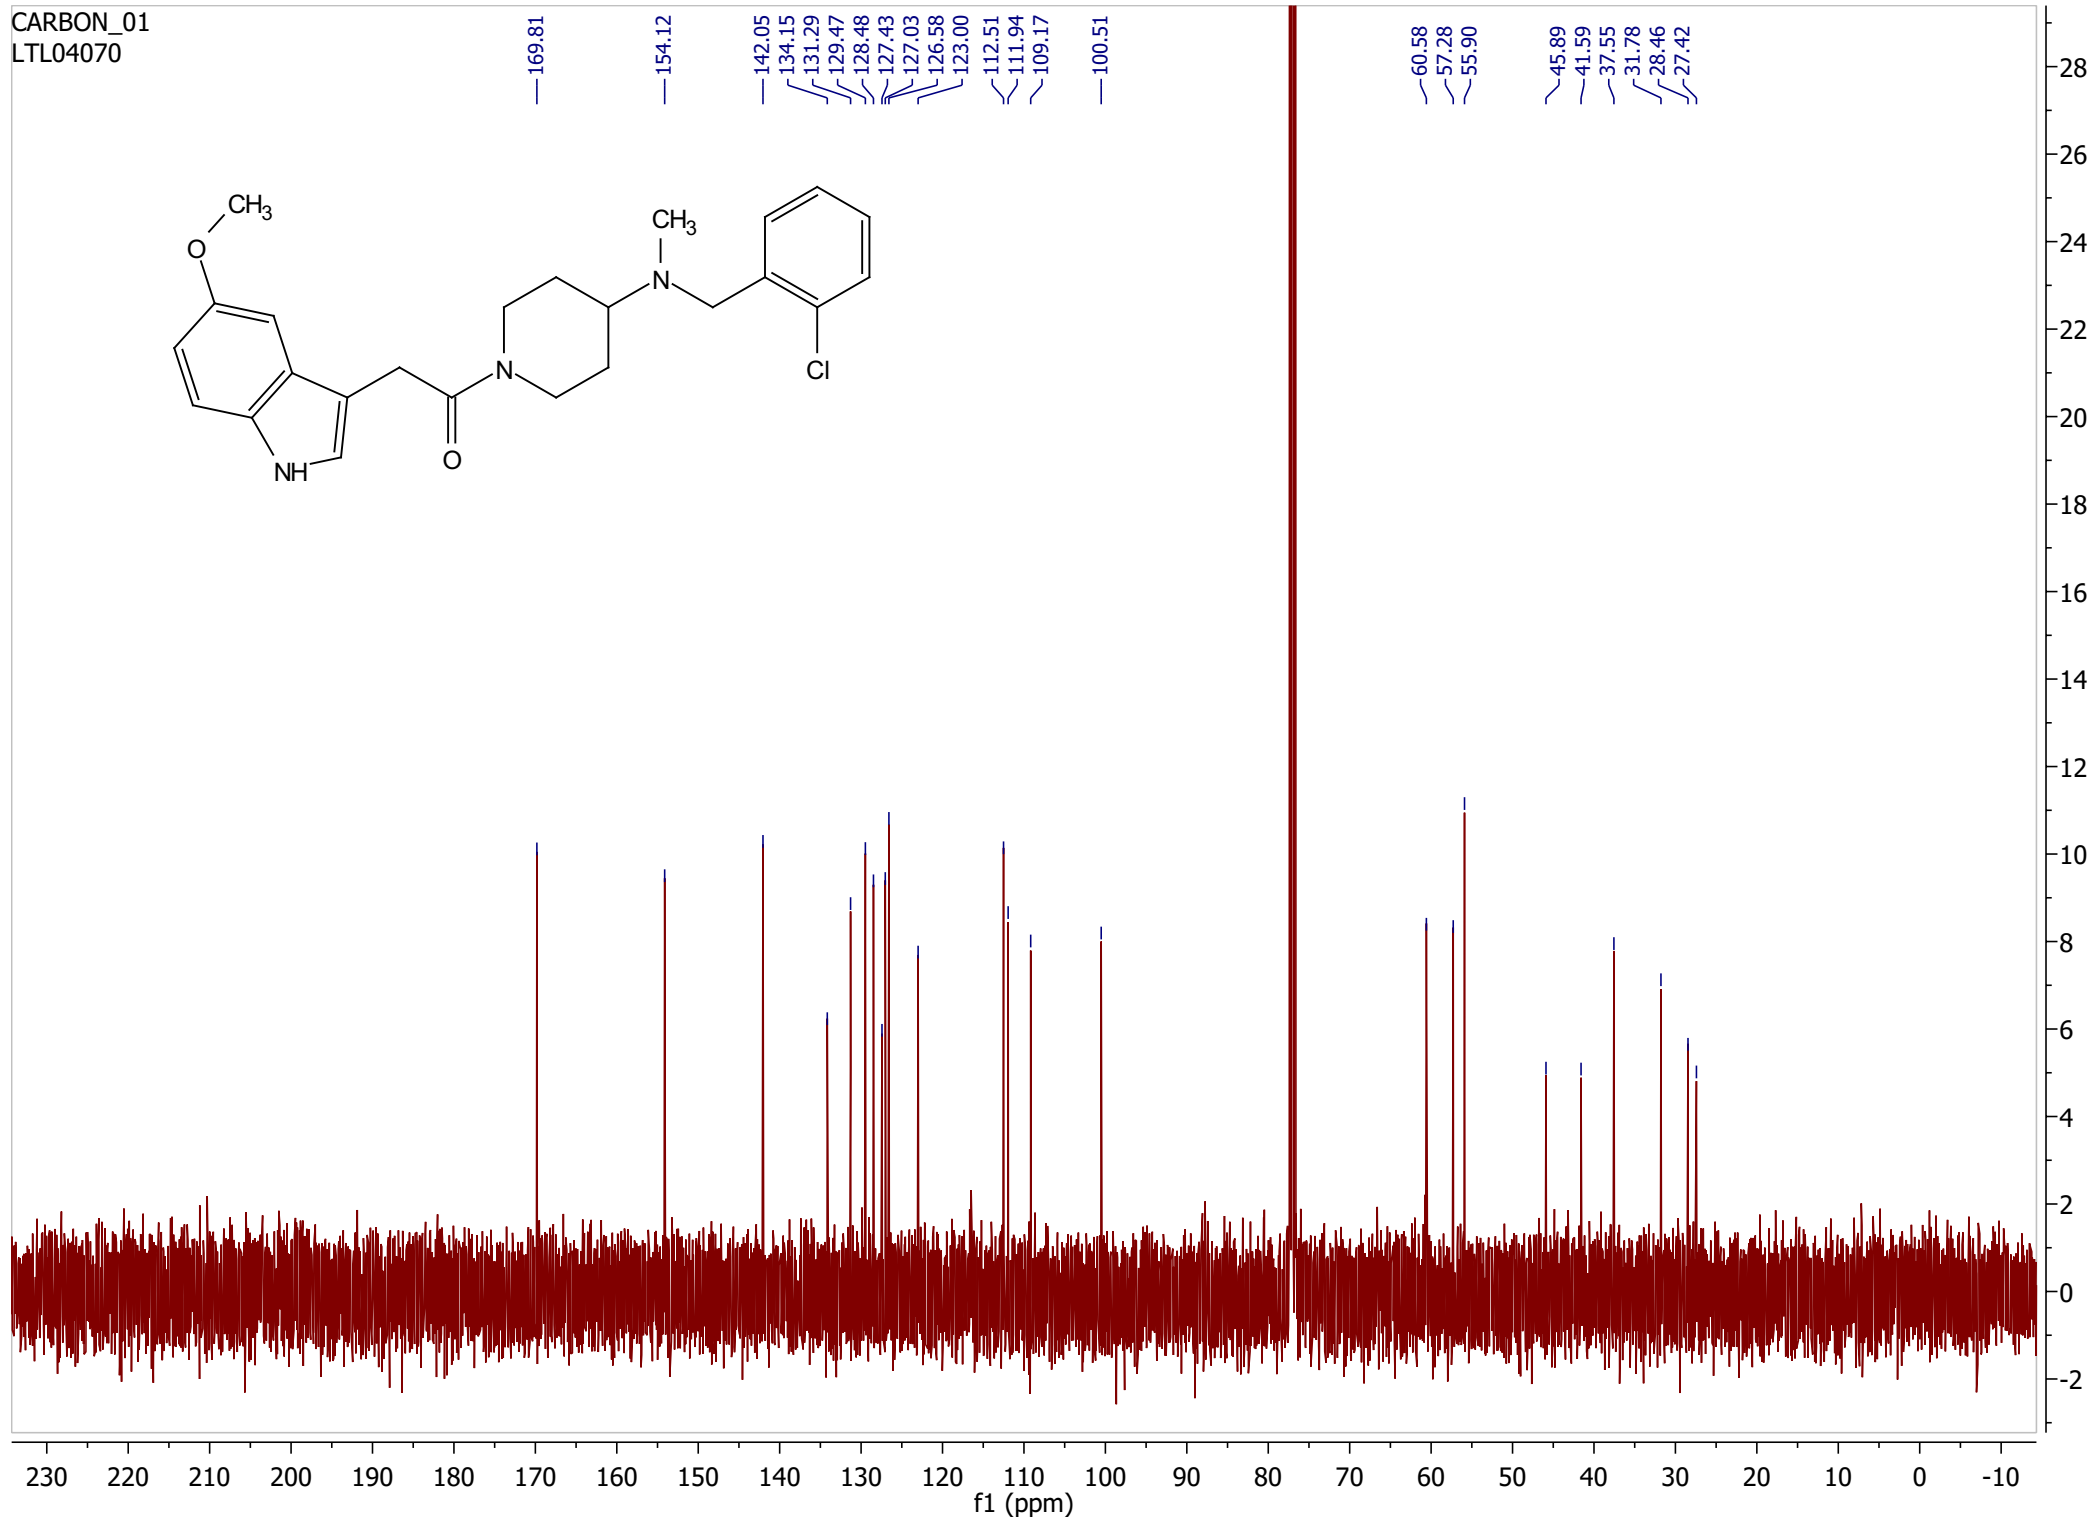



LTL03163  
STANDARD 1H OBSERVE

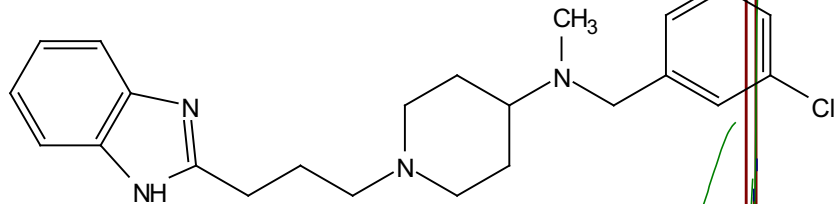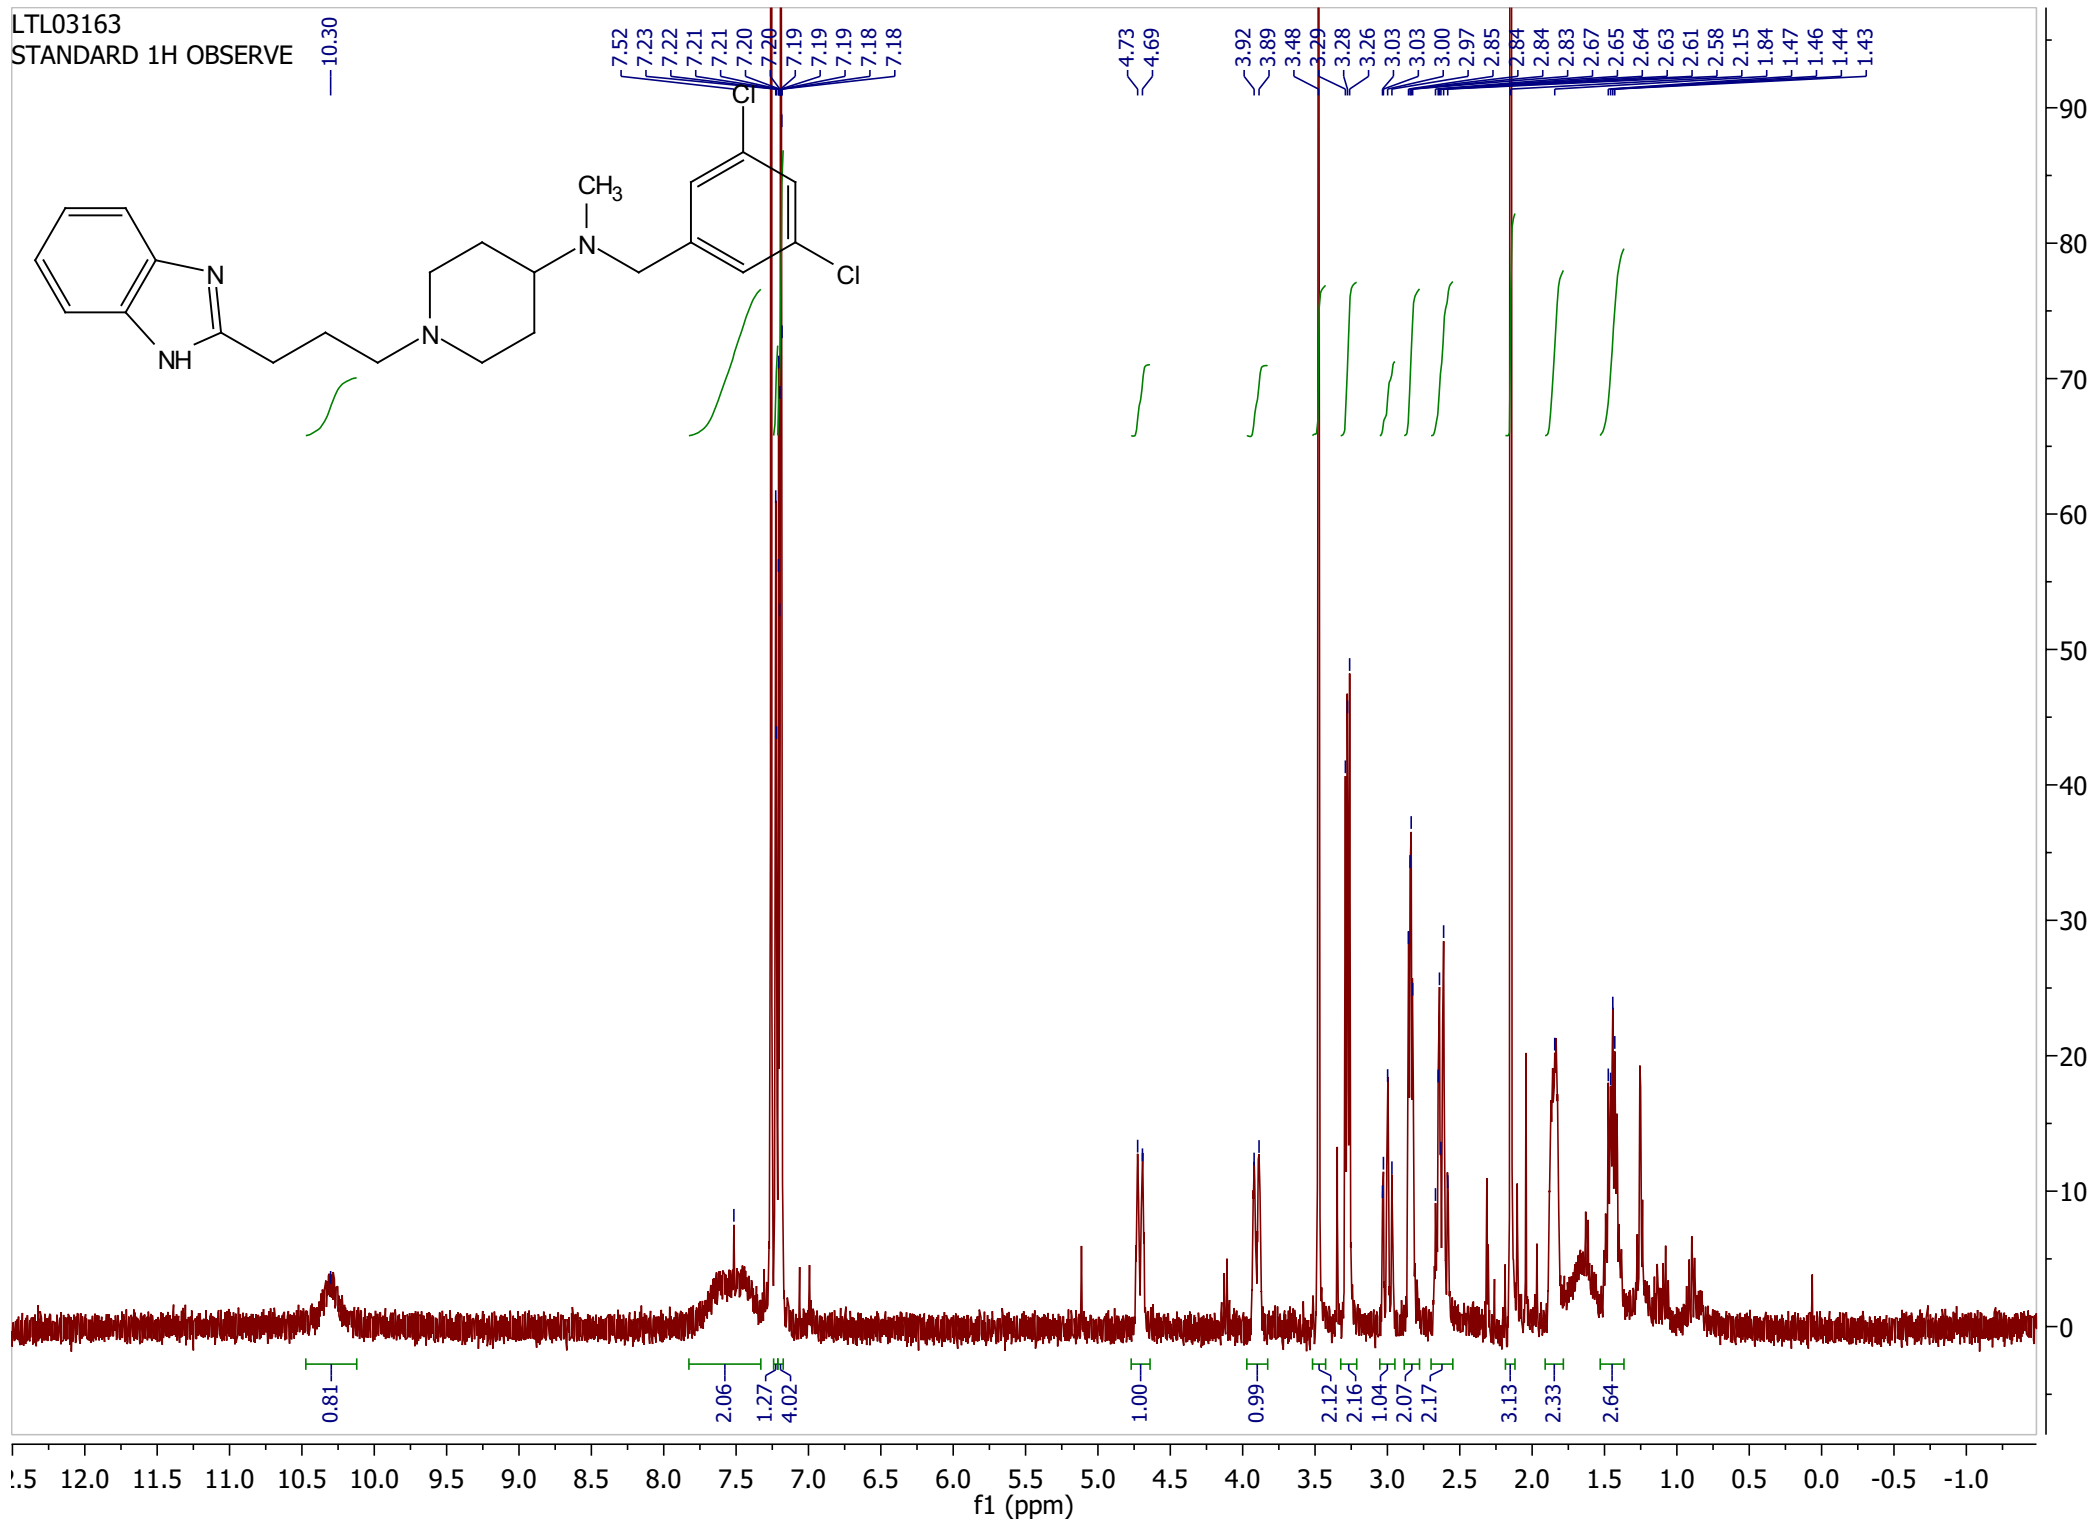

CARBON\_01  
LTL03163\_13C

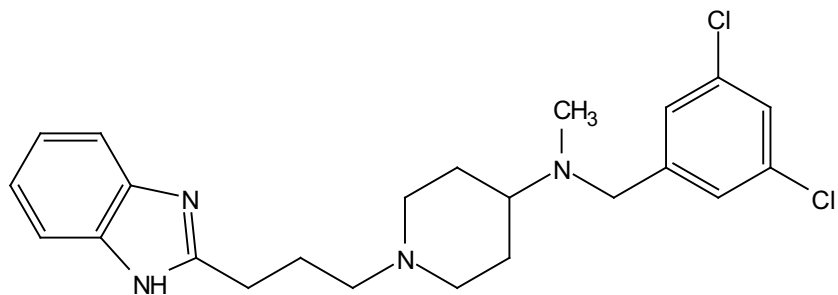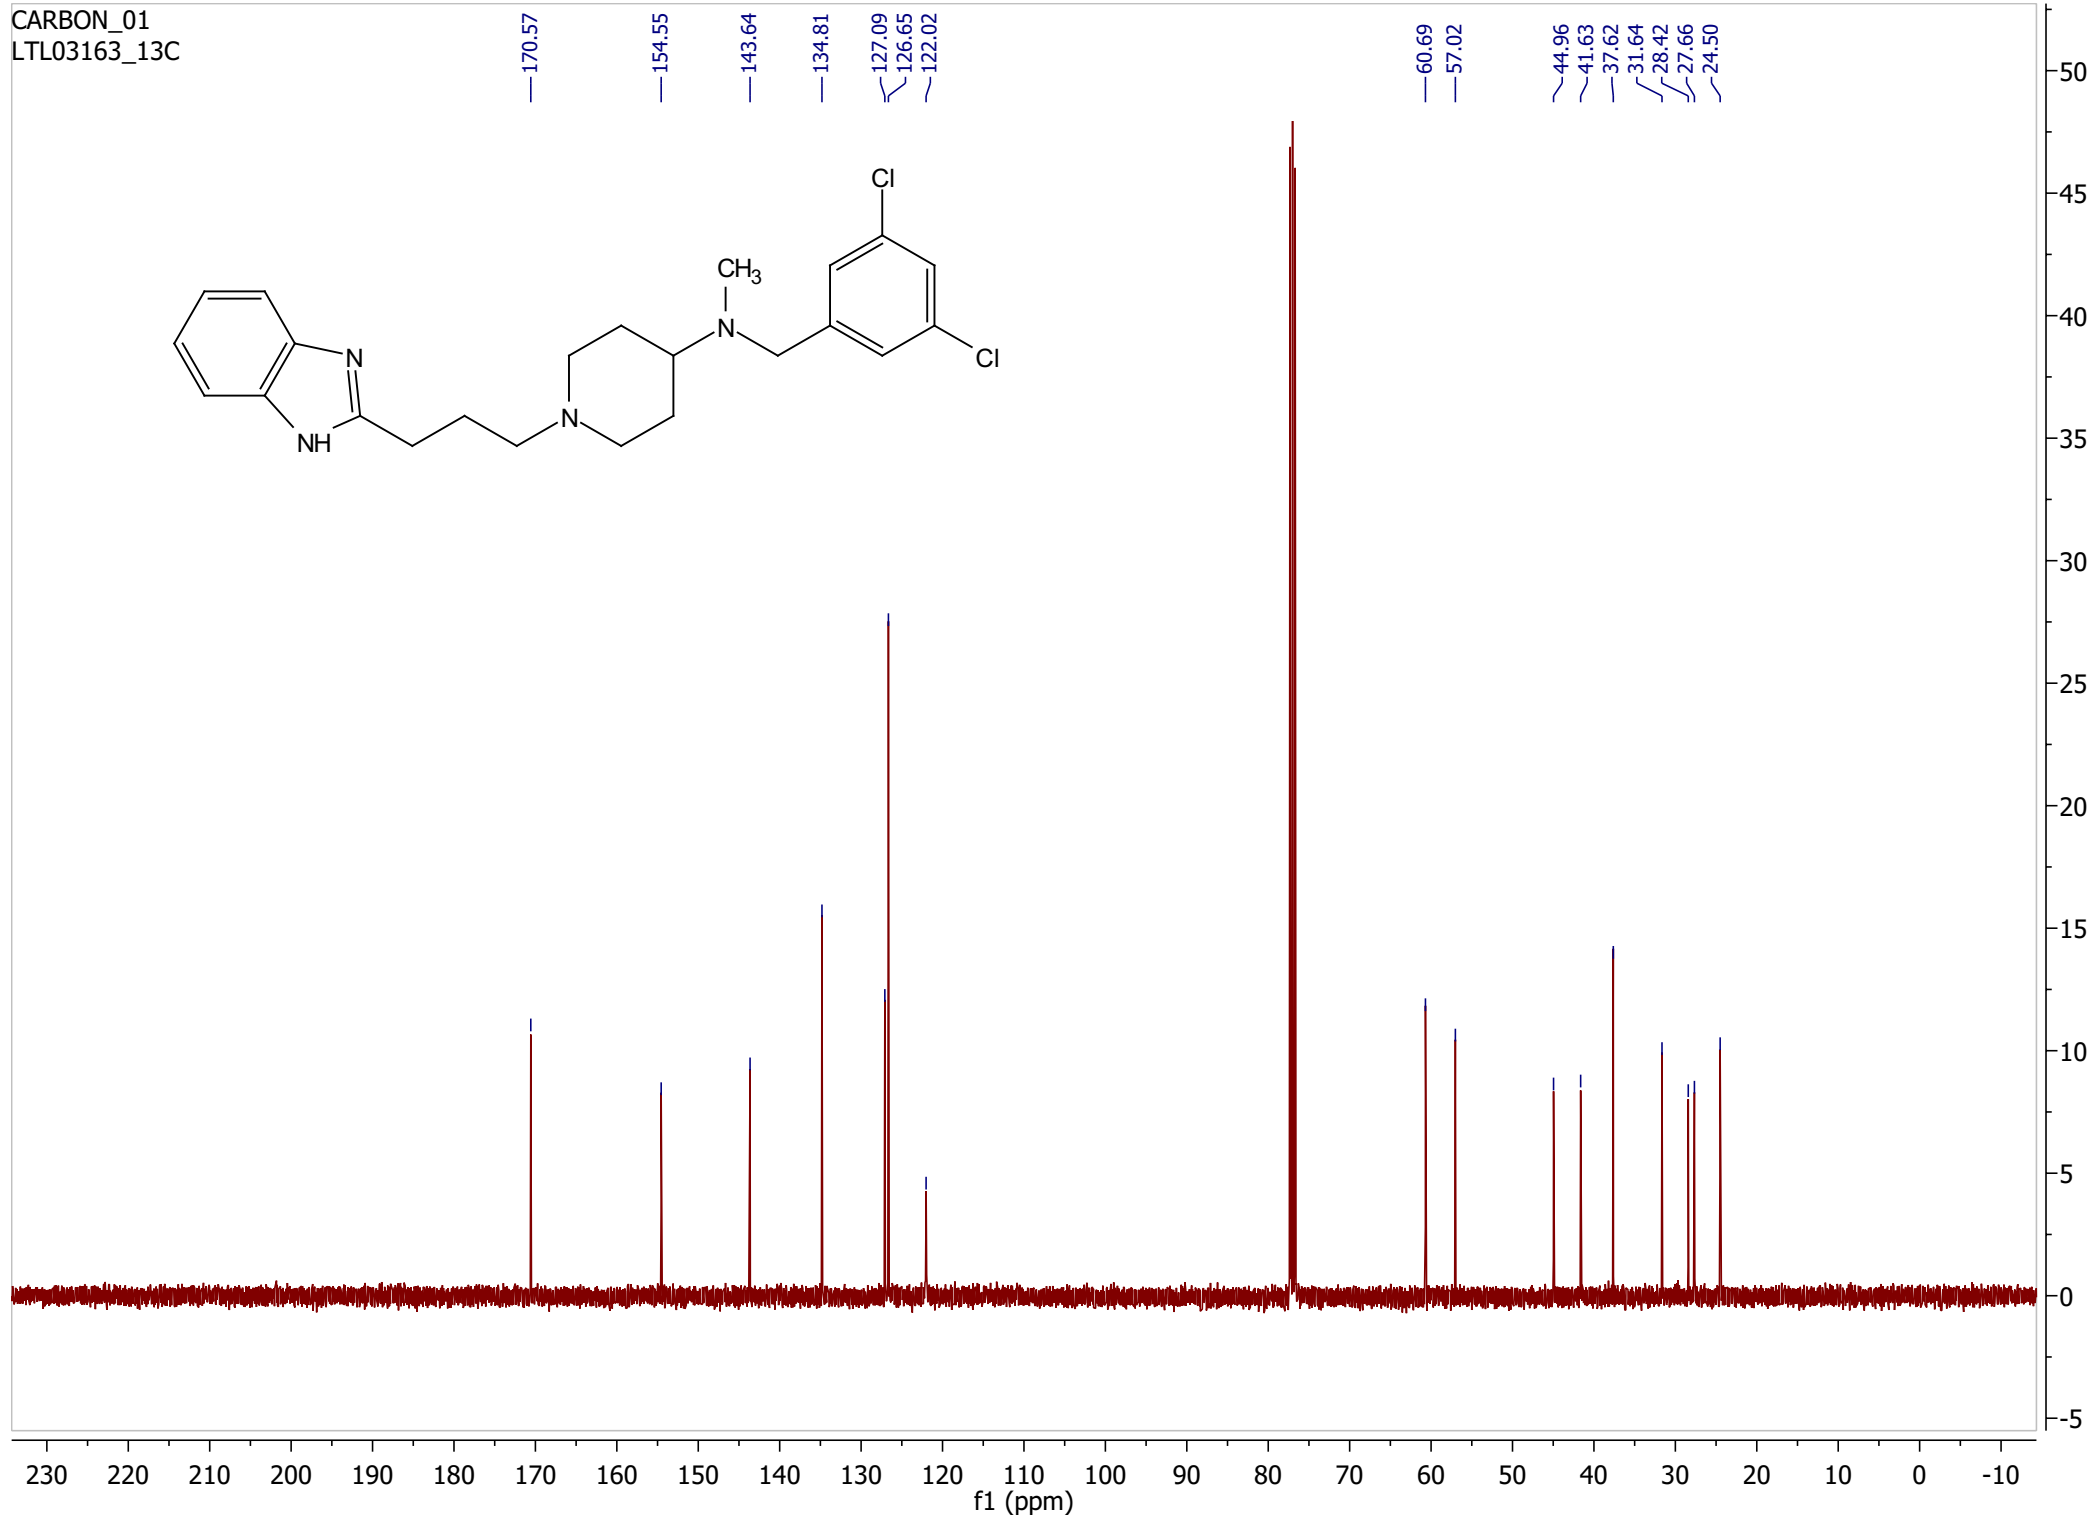

PROTON\_01  
LTL04026protoncarbon

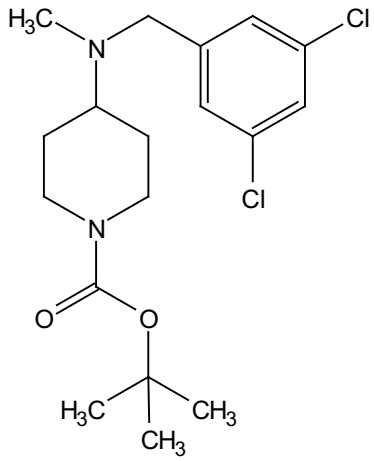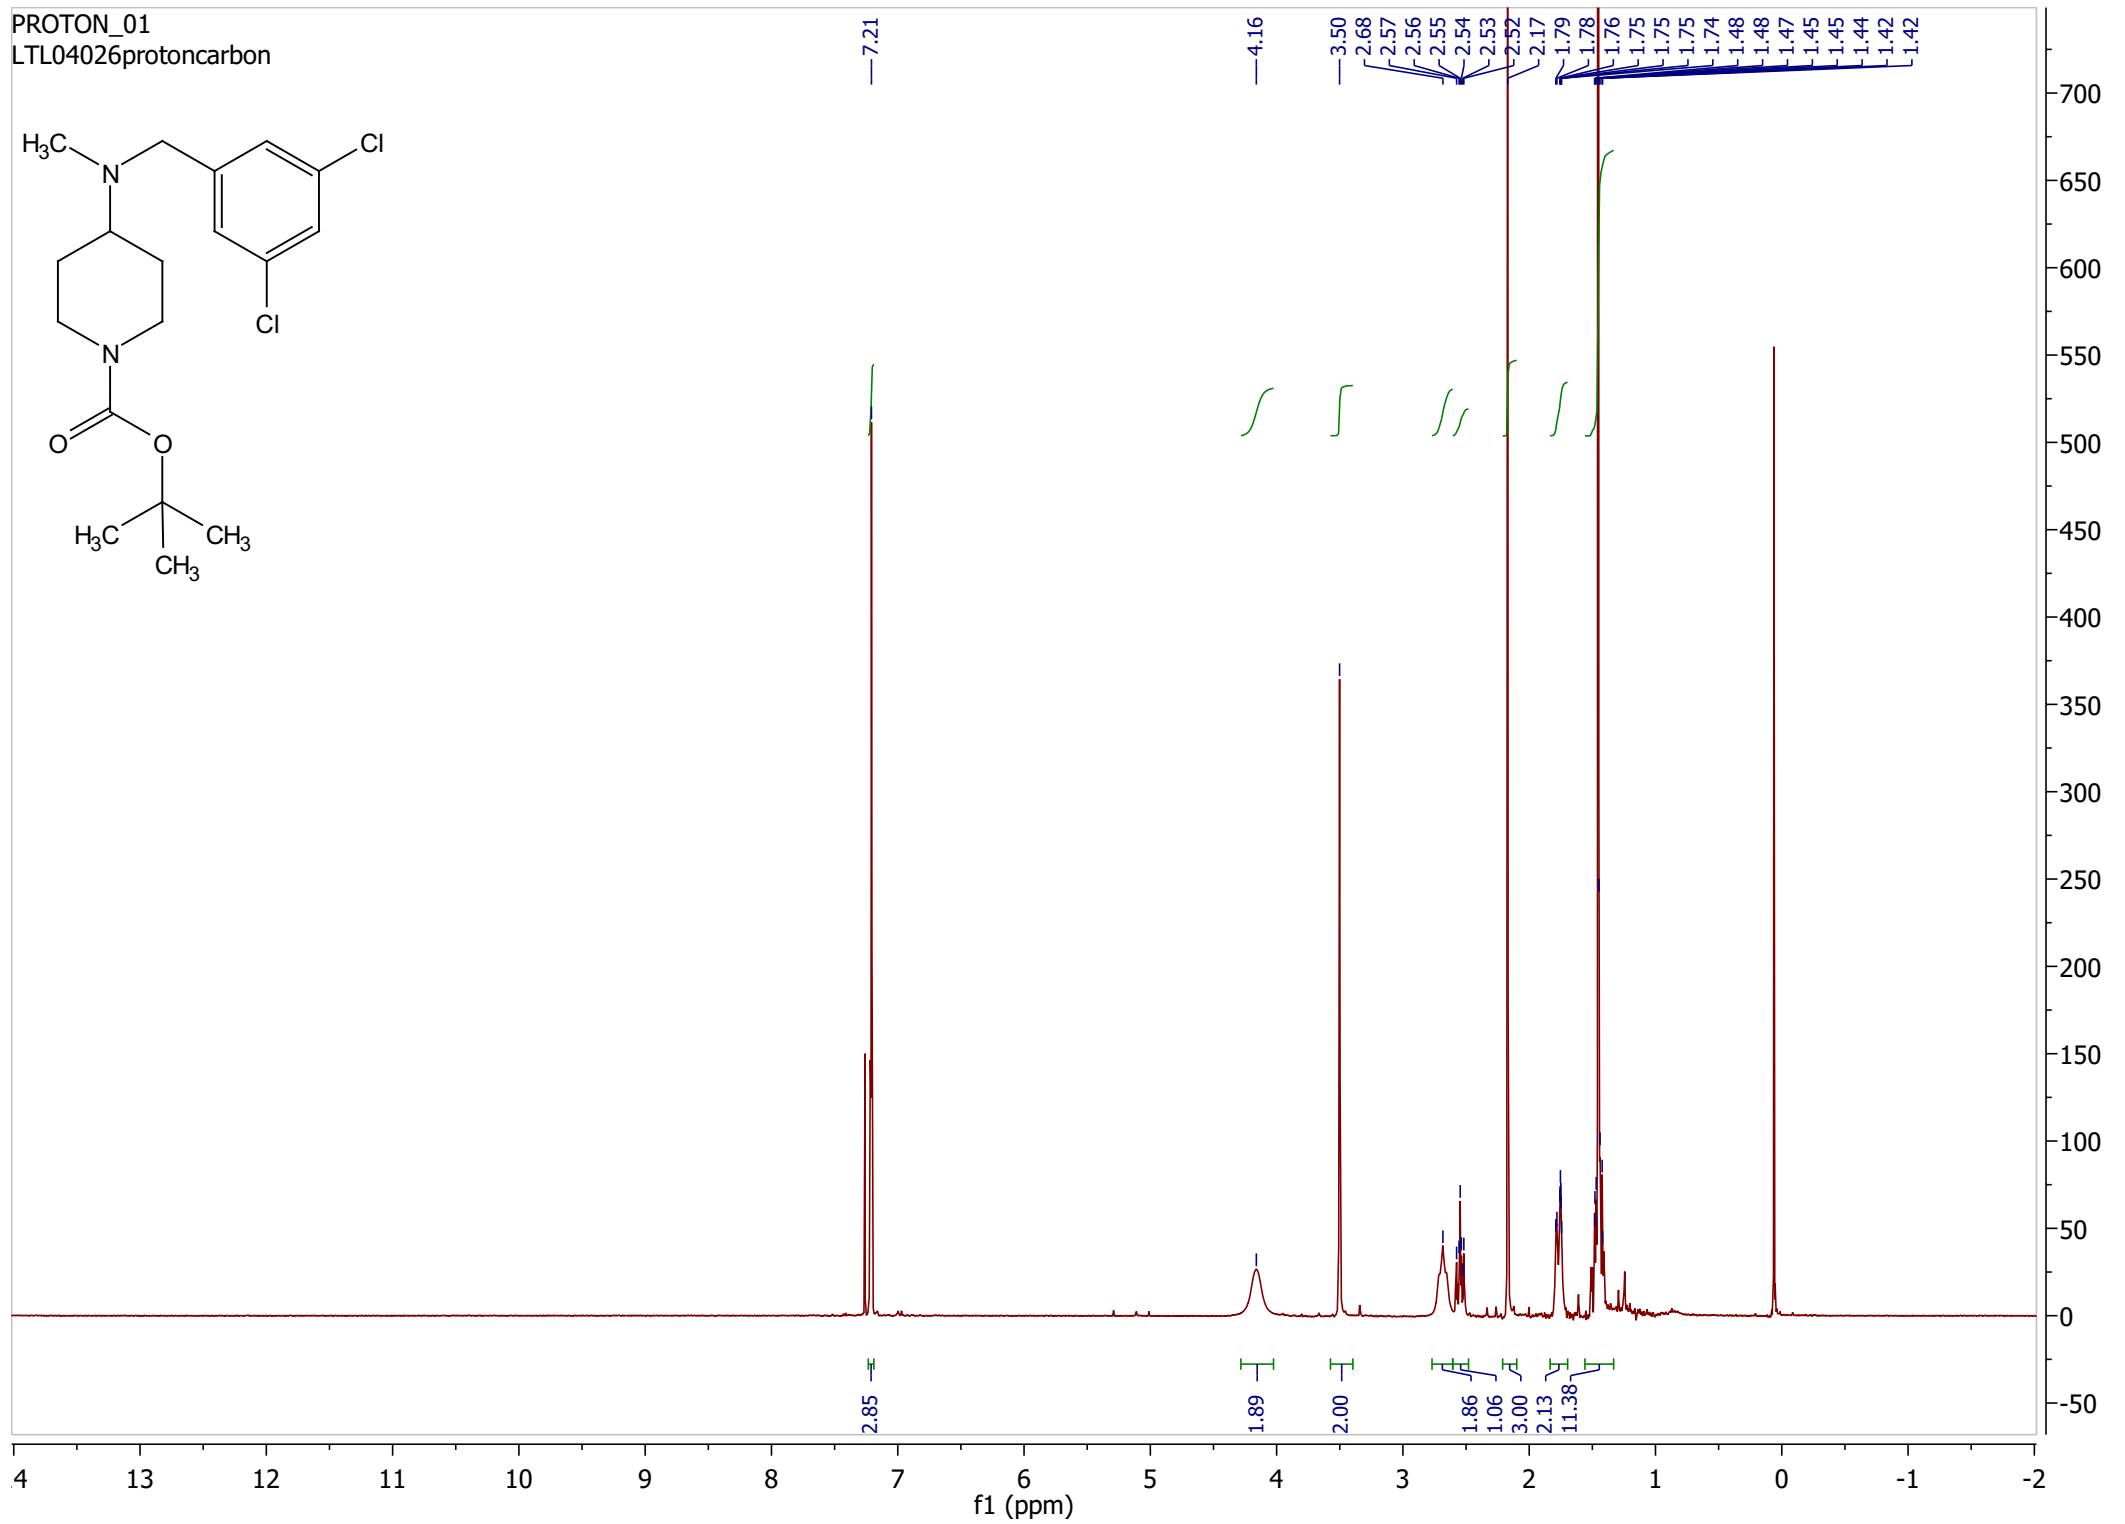

CARBON\_01  
LTL04026protoncarbon

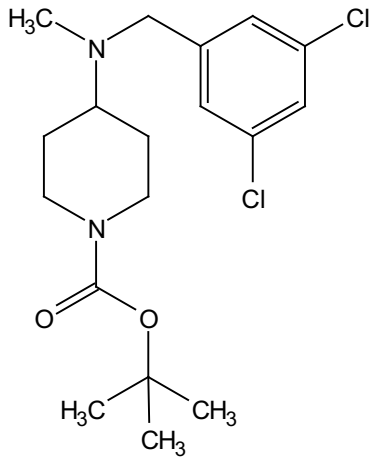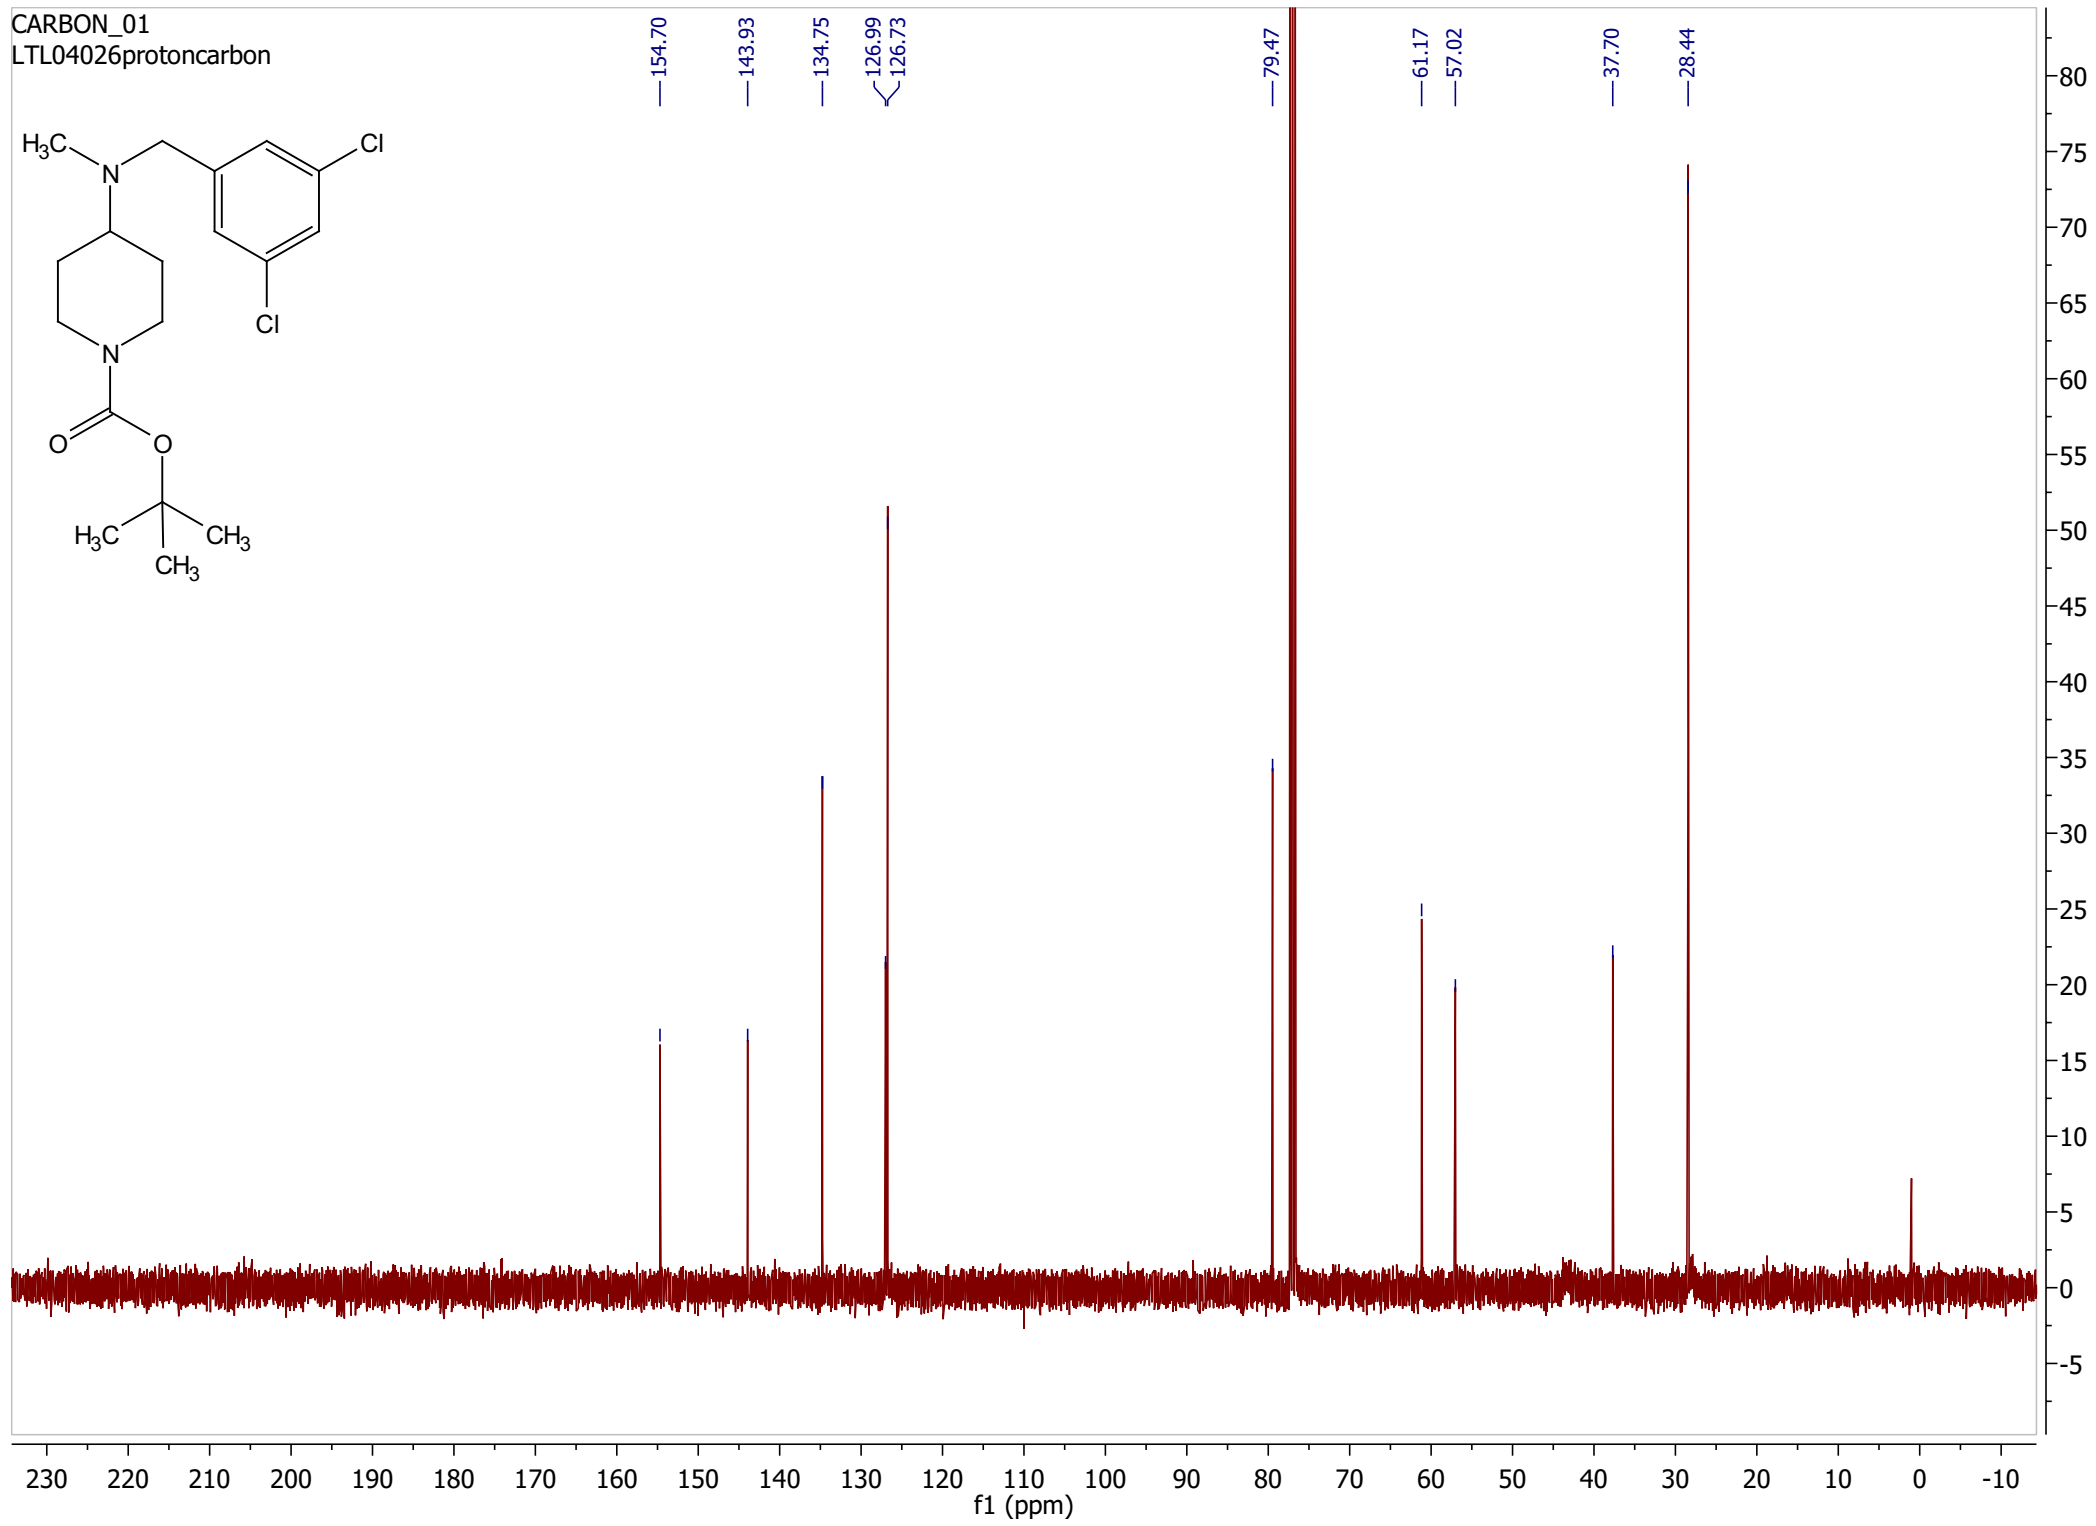

LTL04028  
STANDARD 1H OBSERVE

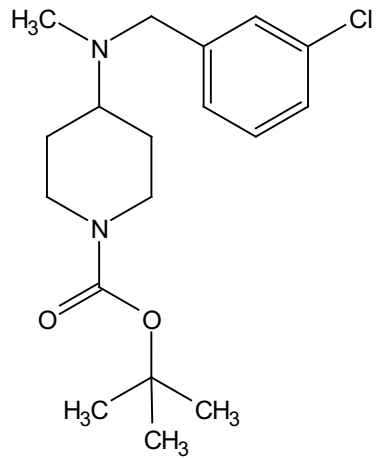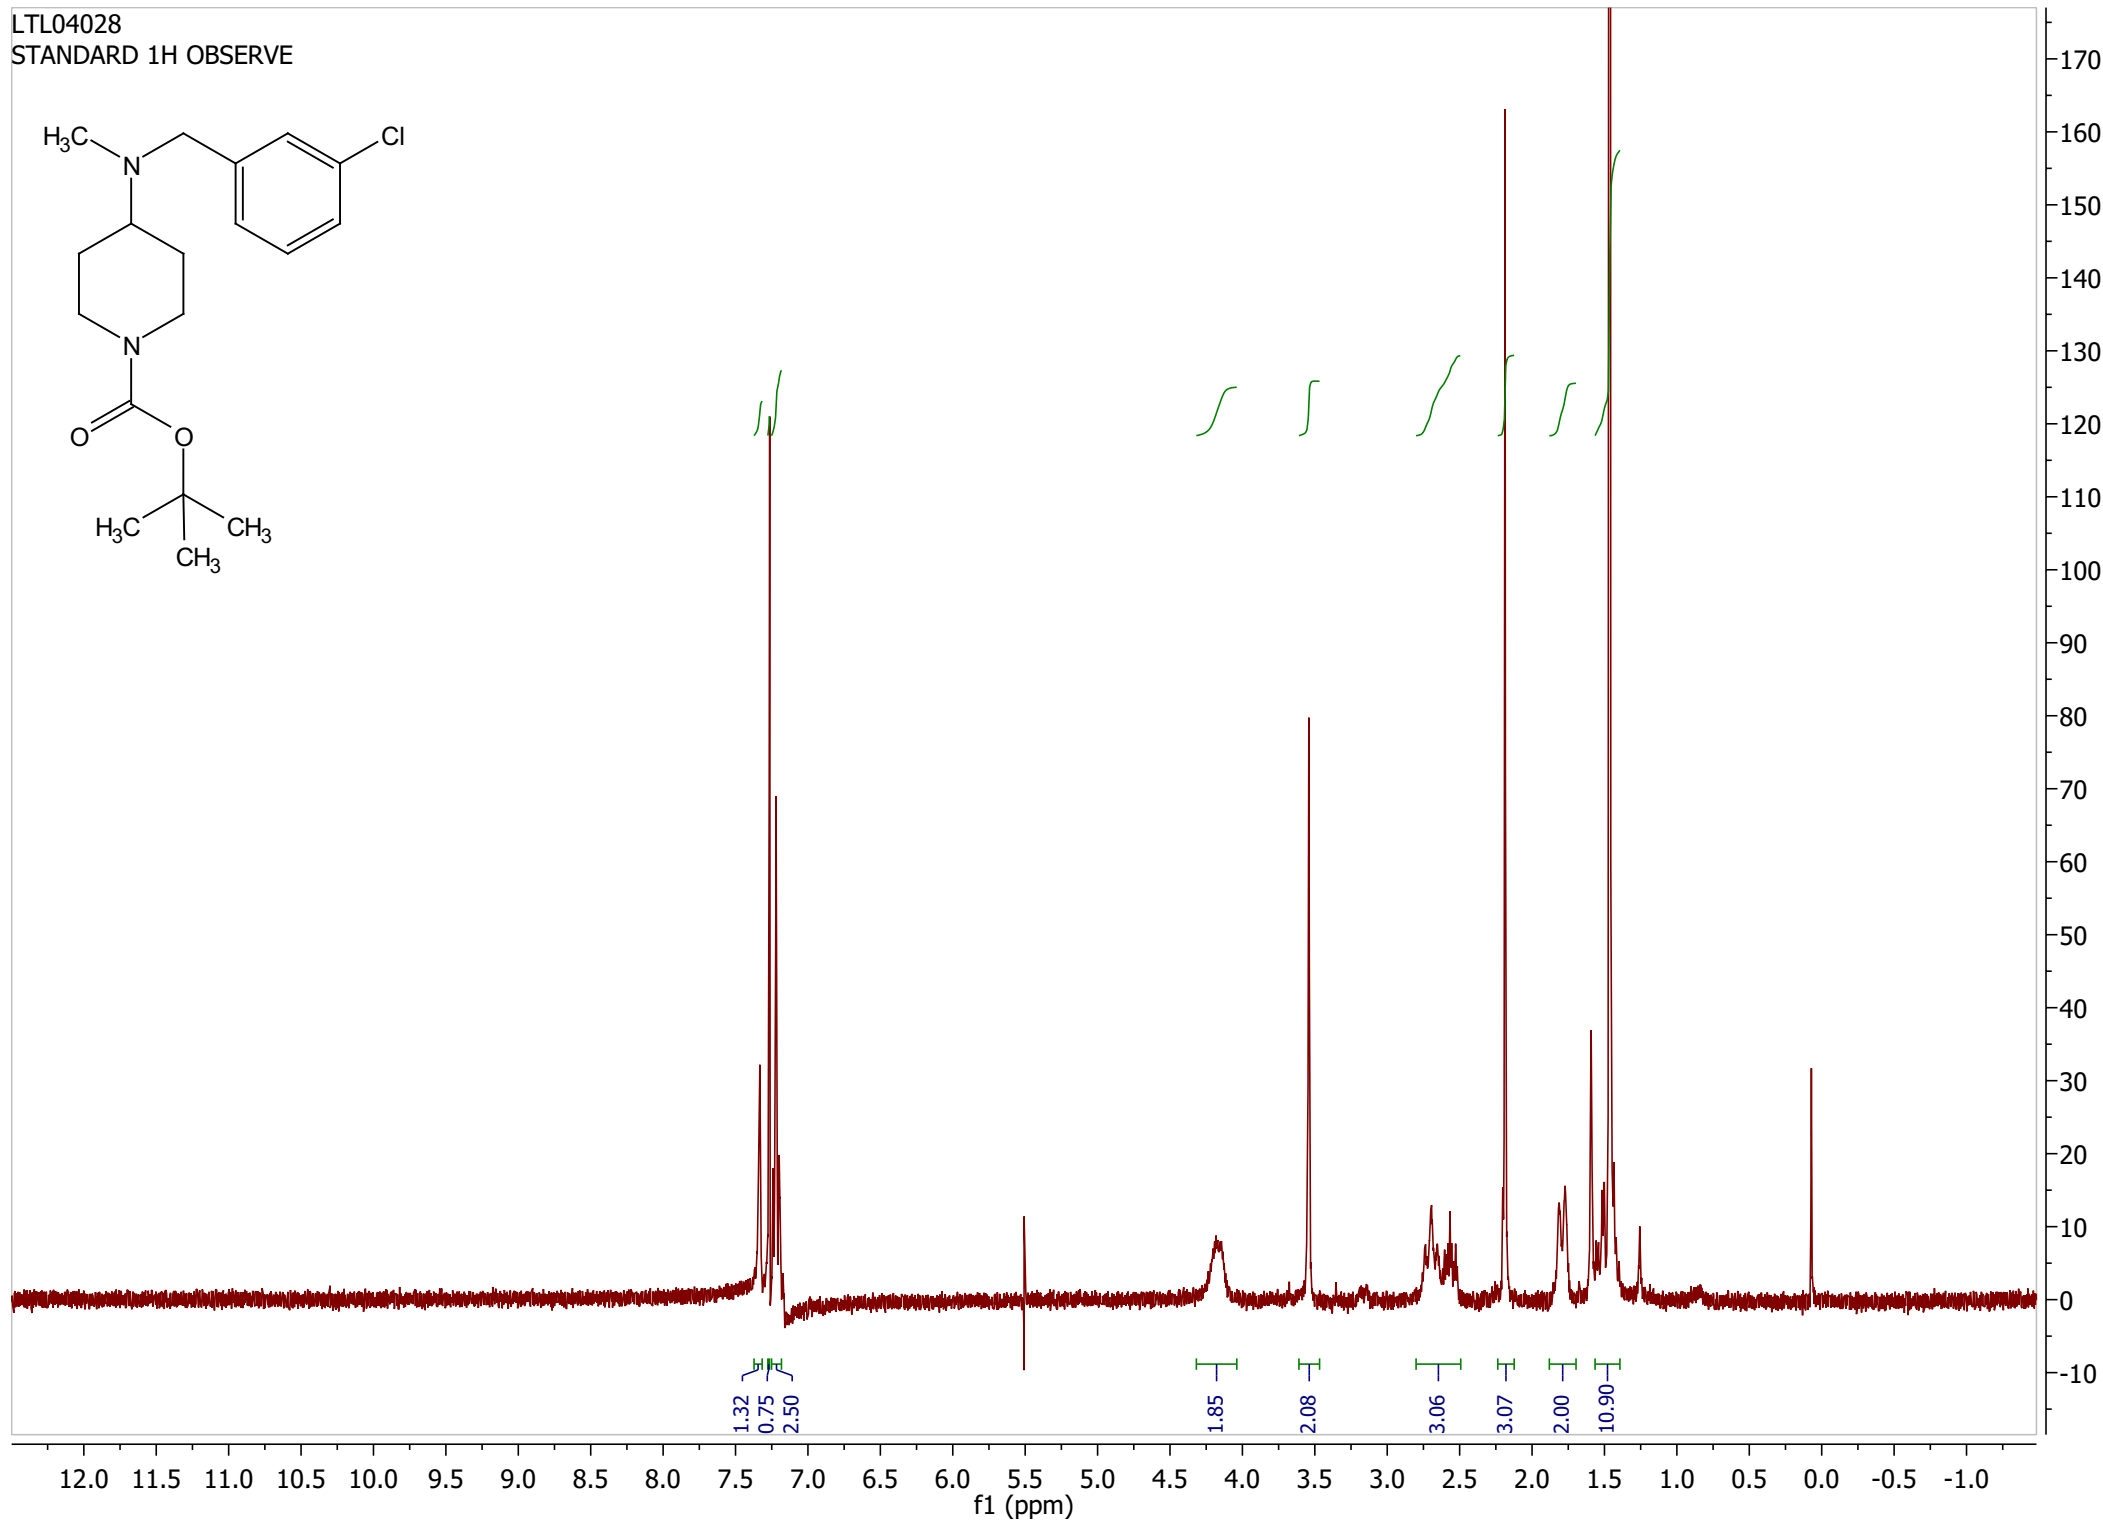

PROTON\_01  
LTL04016  
cdcl3

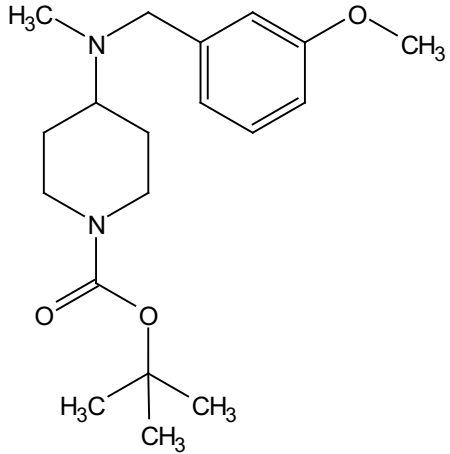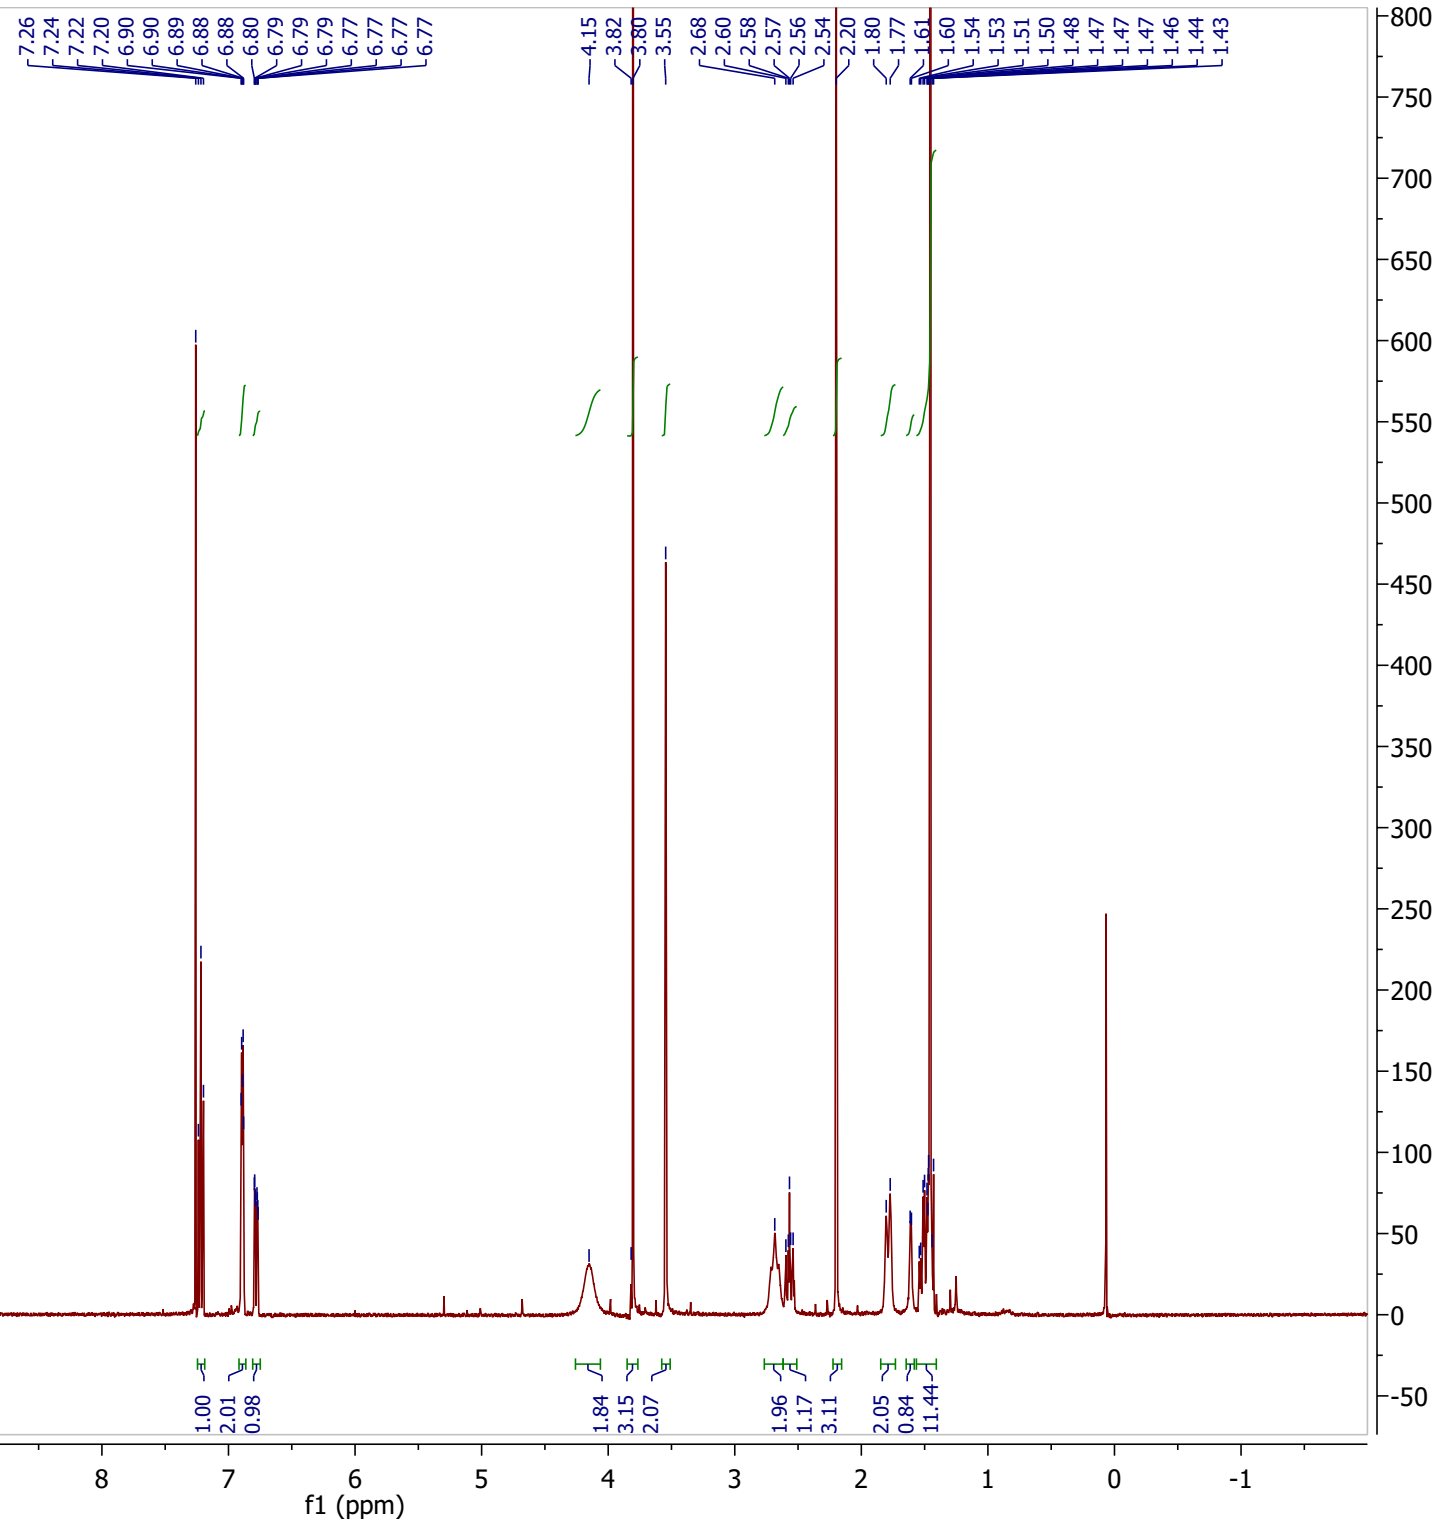

CARBON\_01  
LTL04016

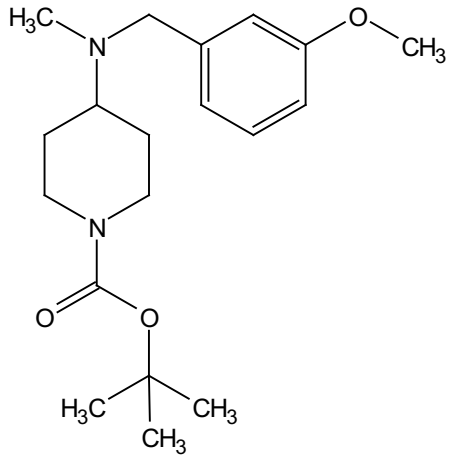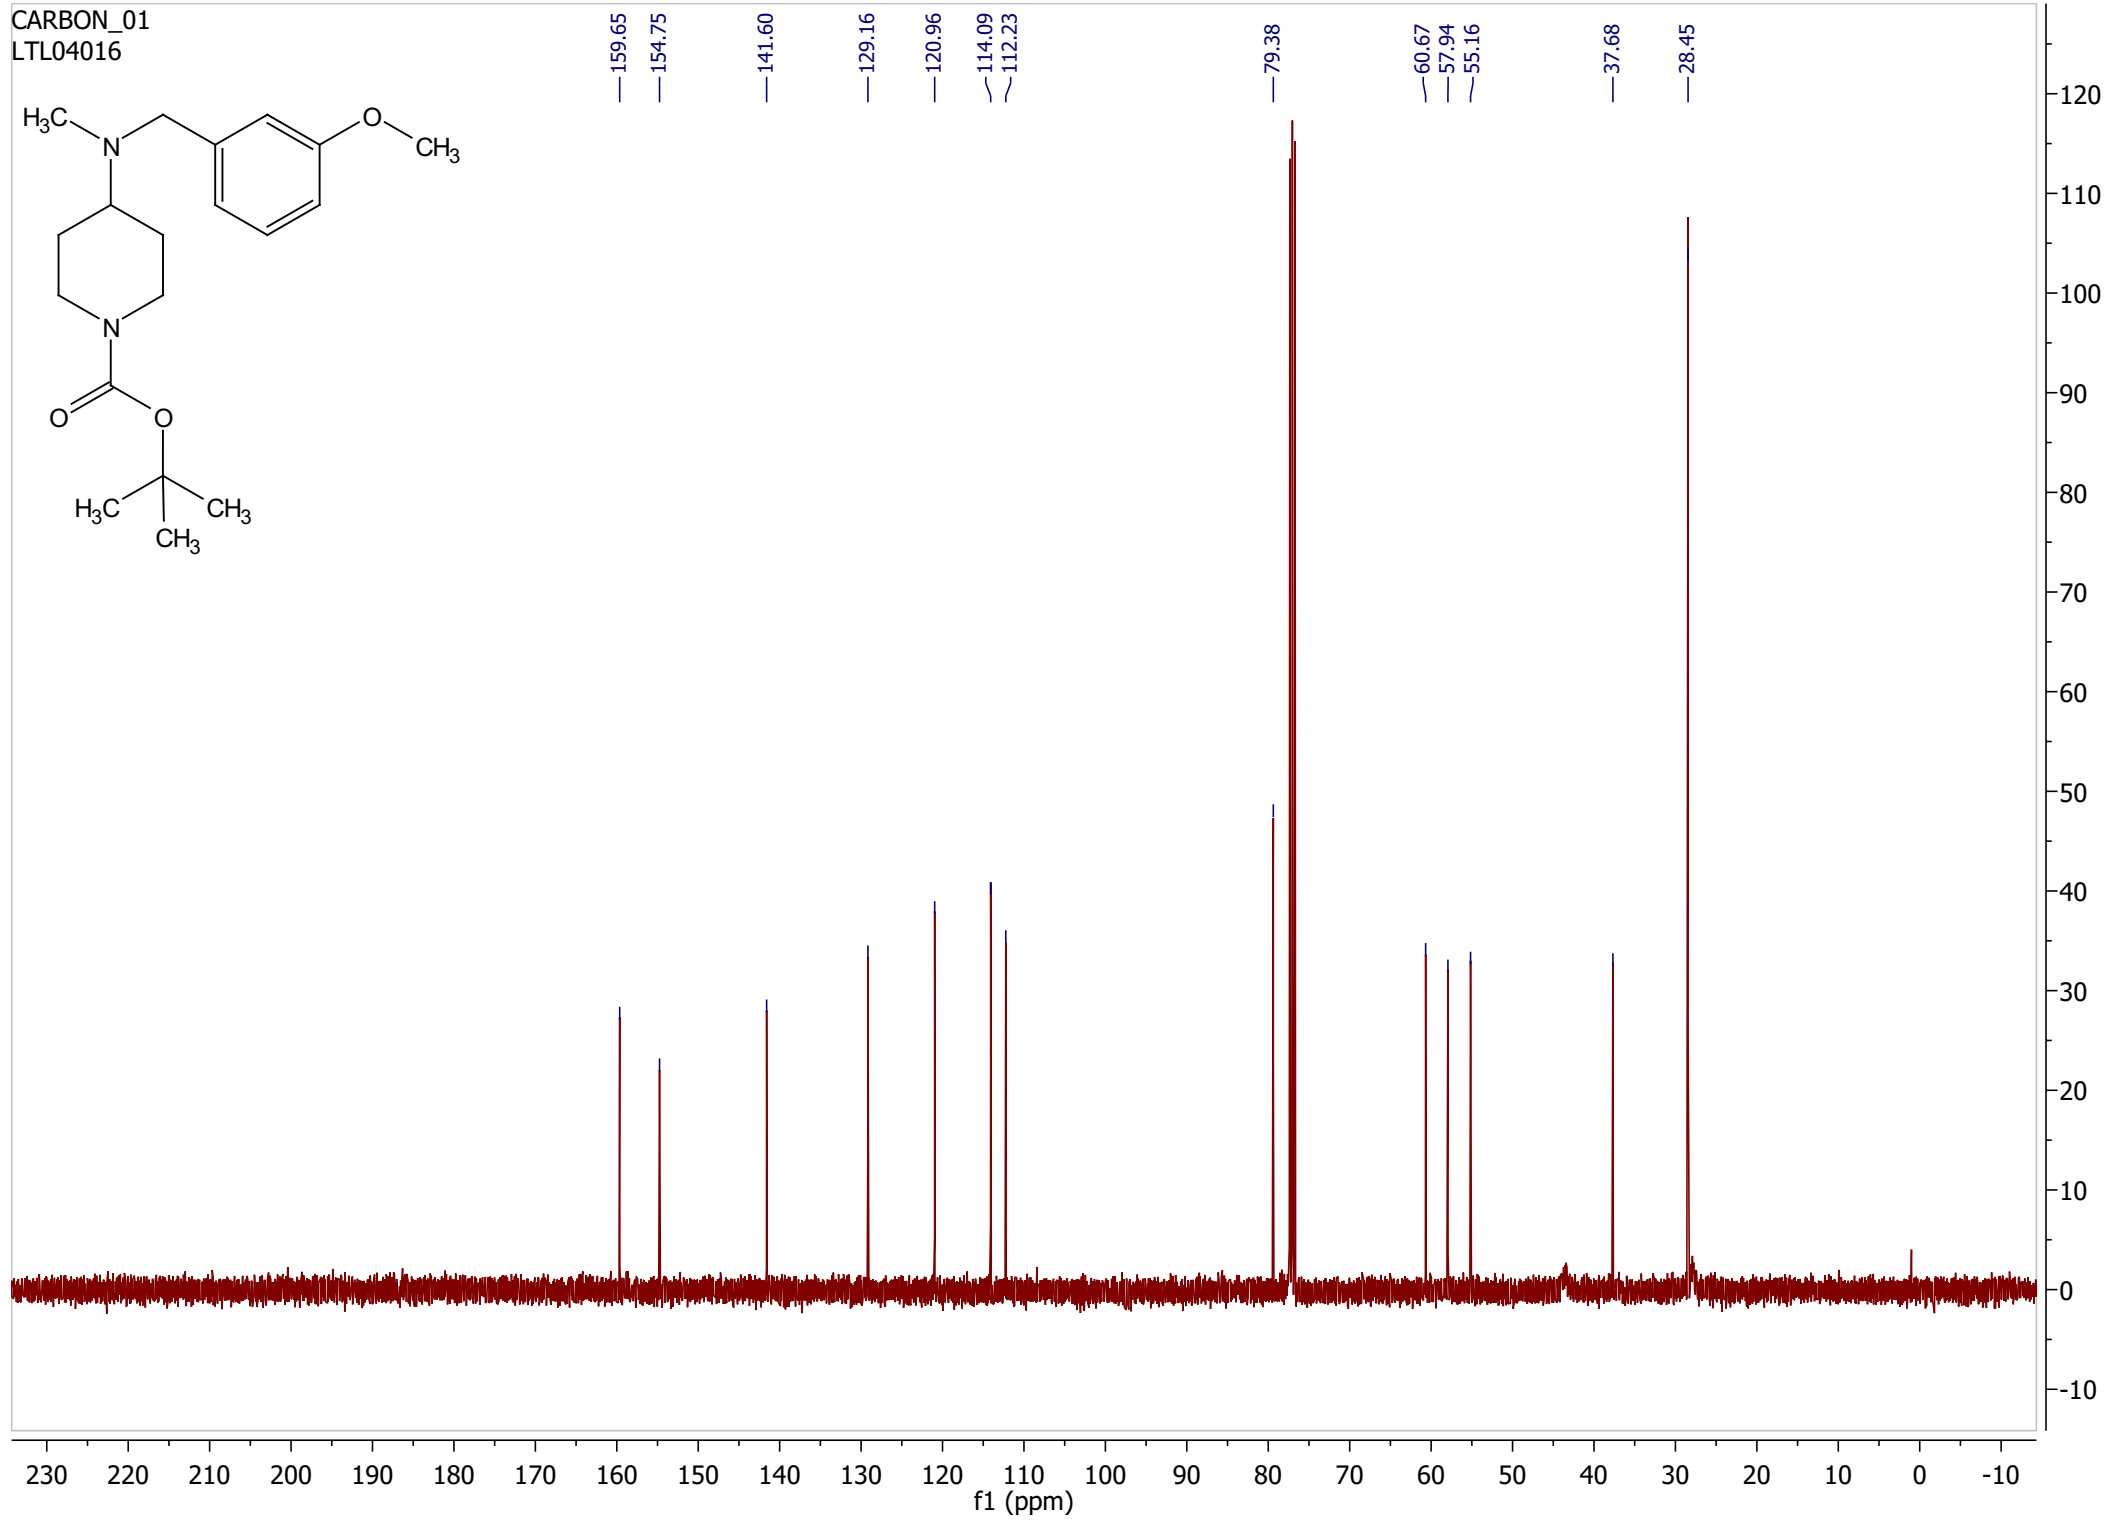

PROTON\_01  
LTL04020

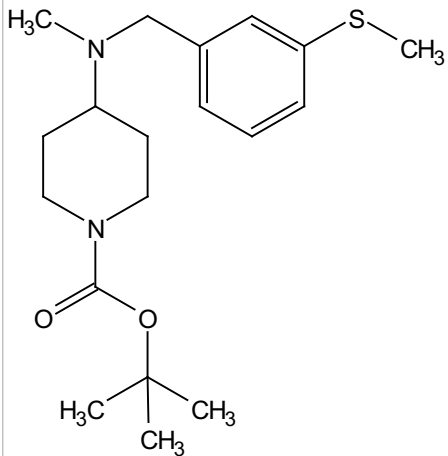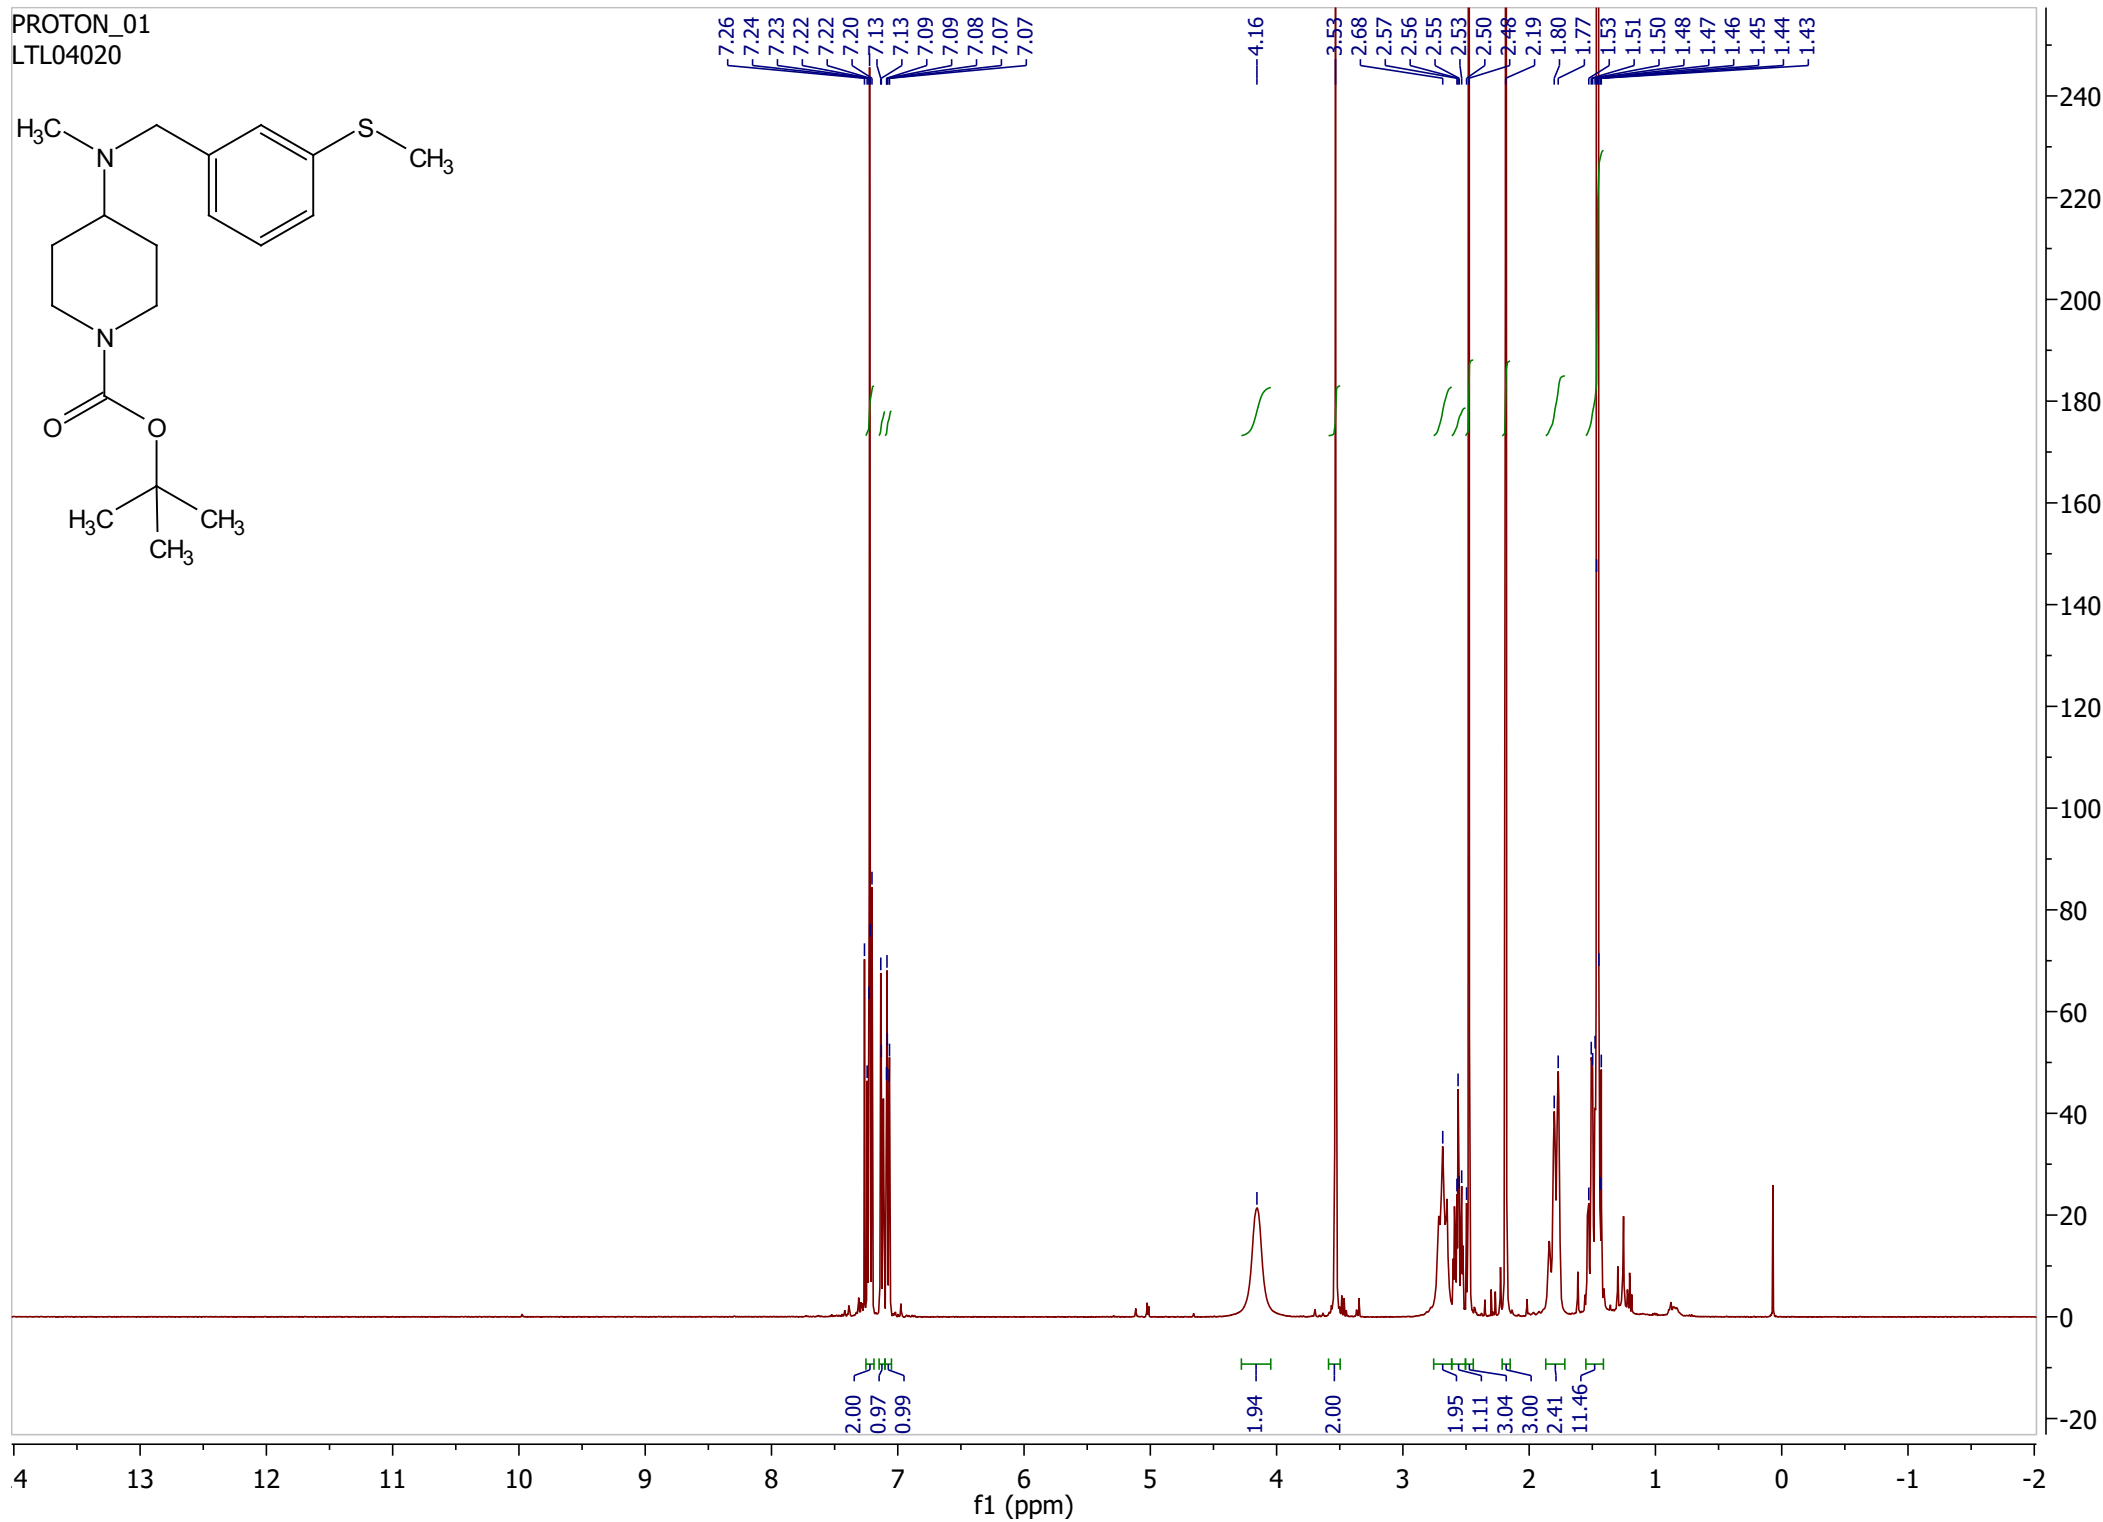



CARBON\_01  
LTL04020

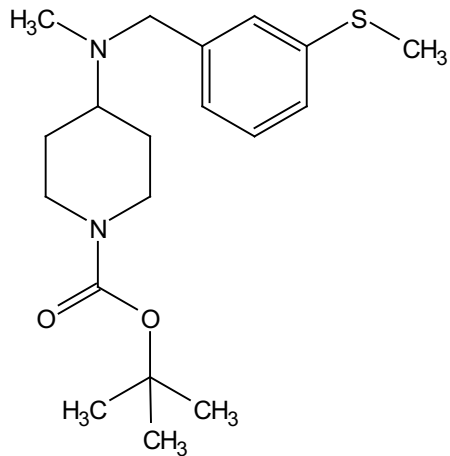

— 154.74

— 140.71

— 138.27

— 128.68

— 126.74

— 125.42

— 124.97

— 79.38

— 60.80

— 57.80

— 37.65

— 28.45

— 15.83

230 220 210 200 190 180 170 160 150 140 130 120 110 100 90 80 70 60 50 40 30 20 10 0 -10  
f1 (ppm)

PROTON\_01  
LTL03152

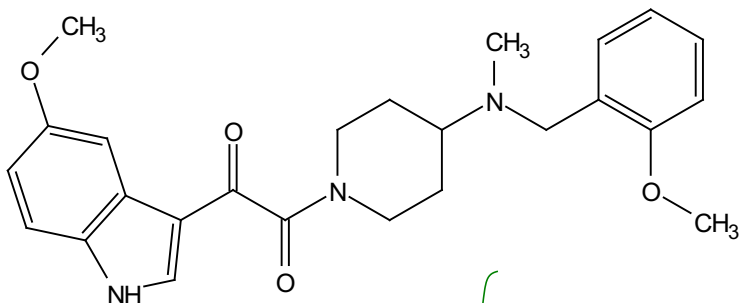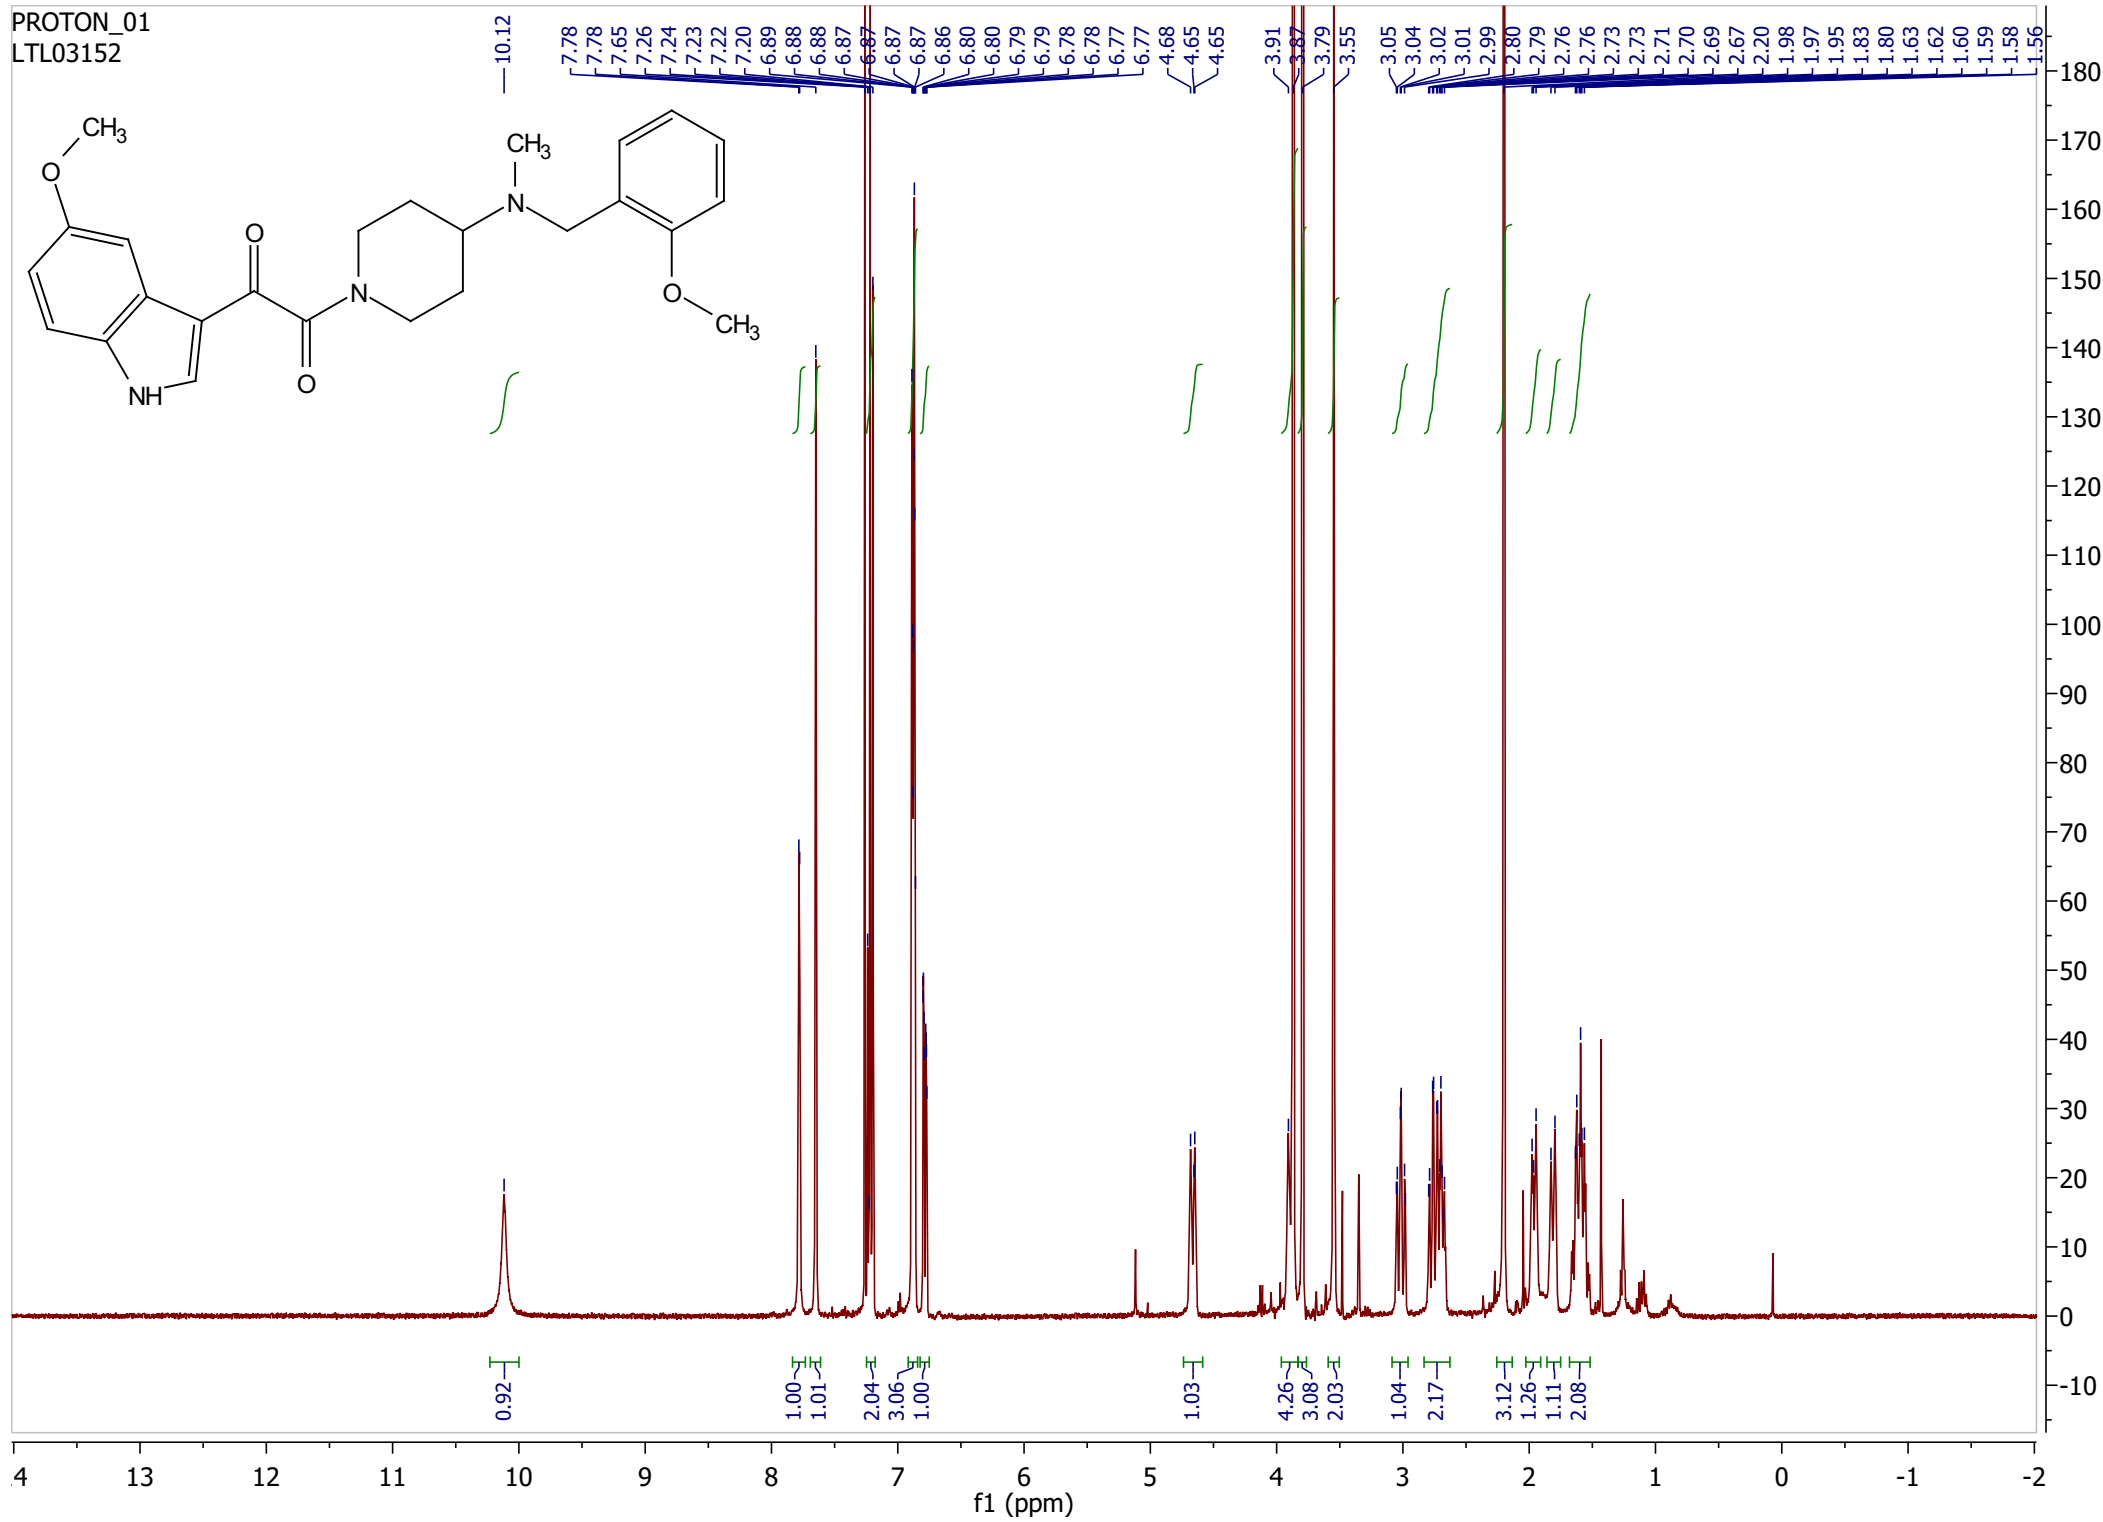

CARBON\_01  
LTL03152

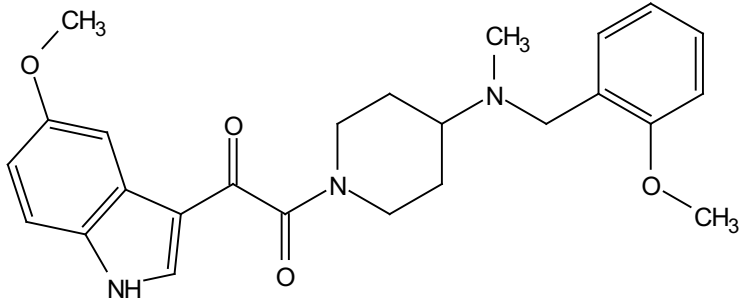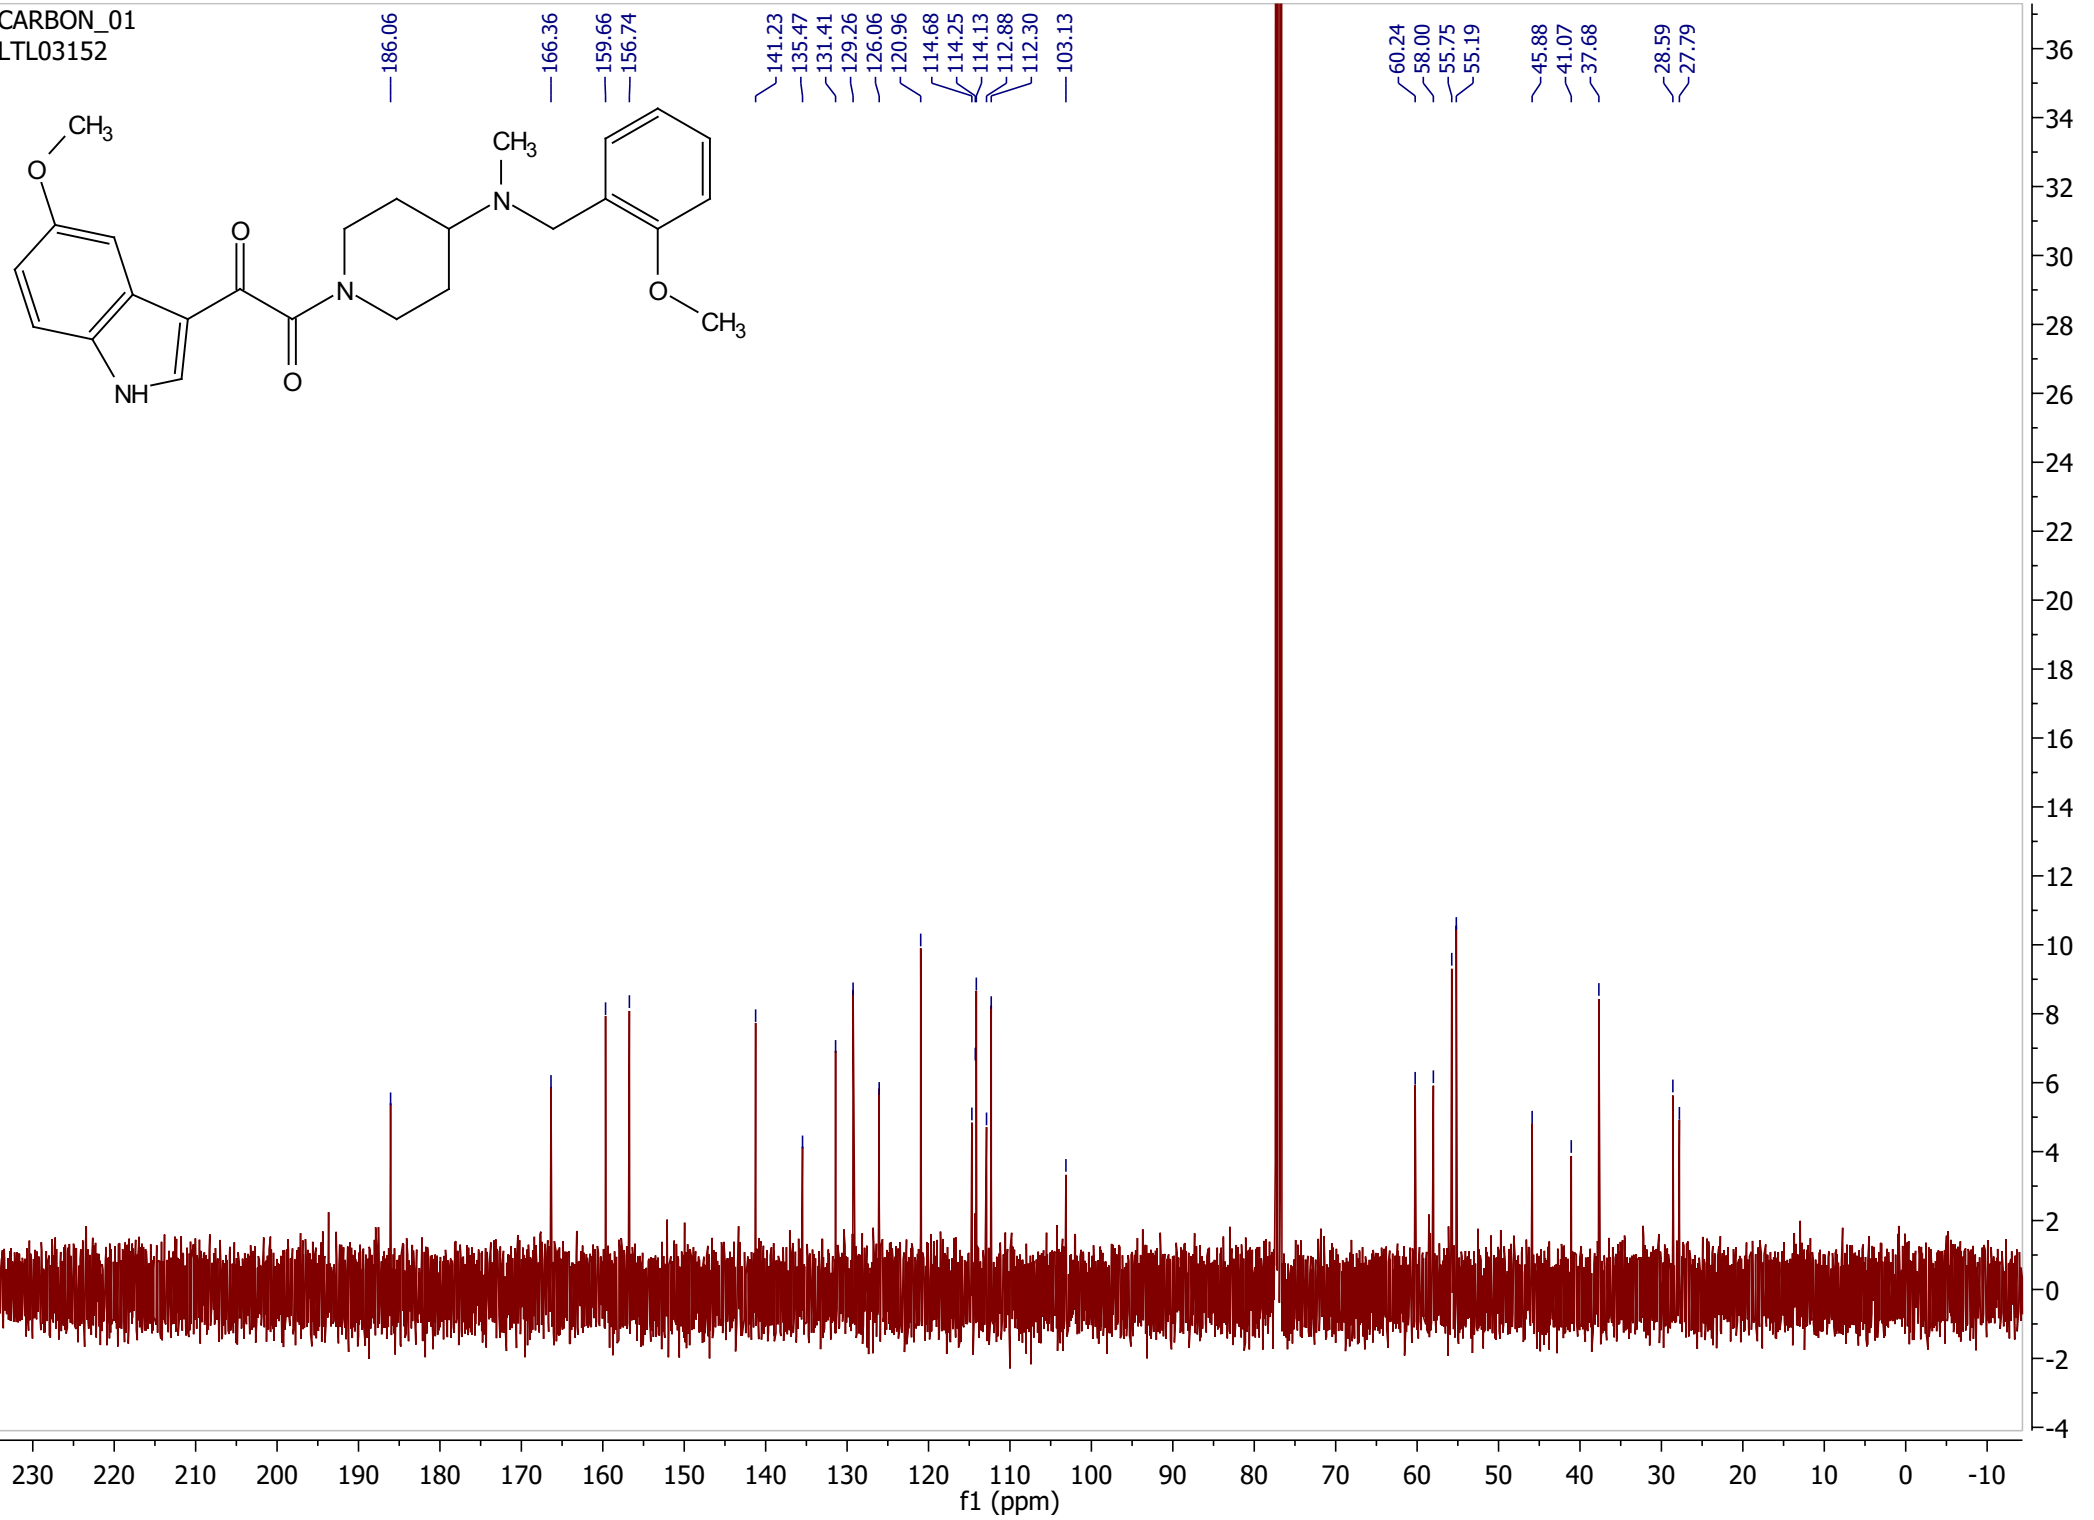

LTL03147\_hivac  
STANDARD 1H OBSERVE

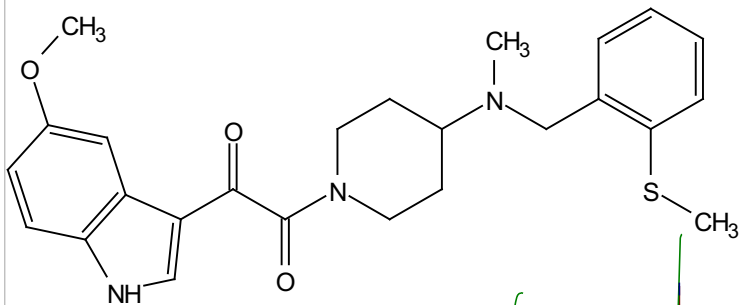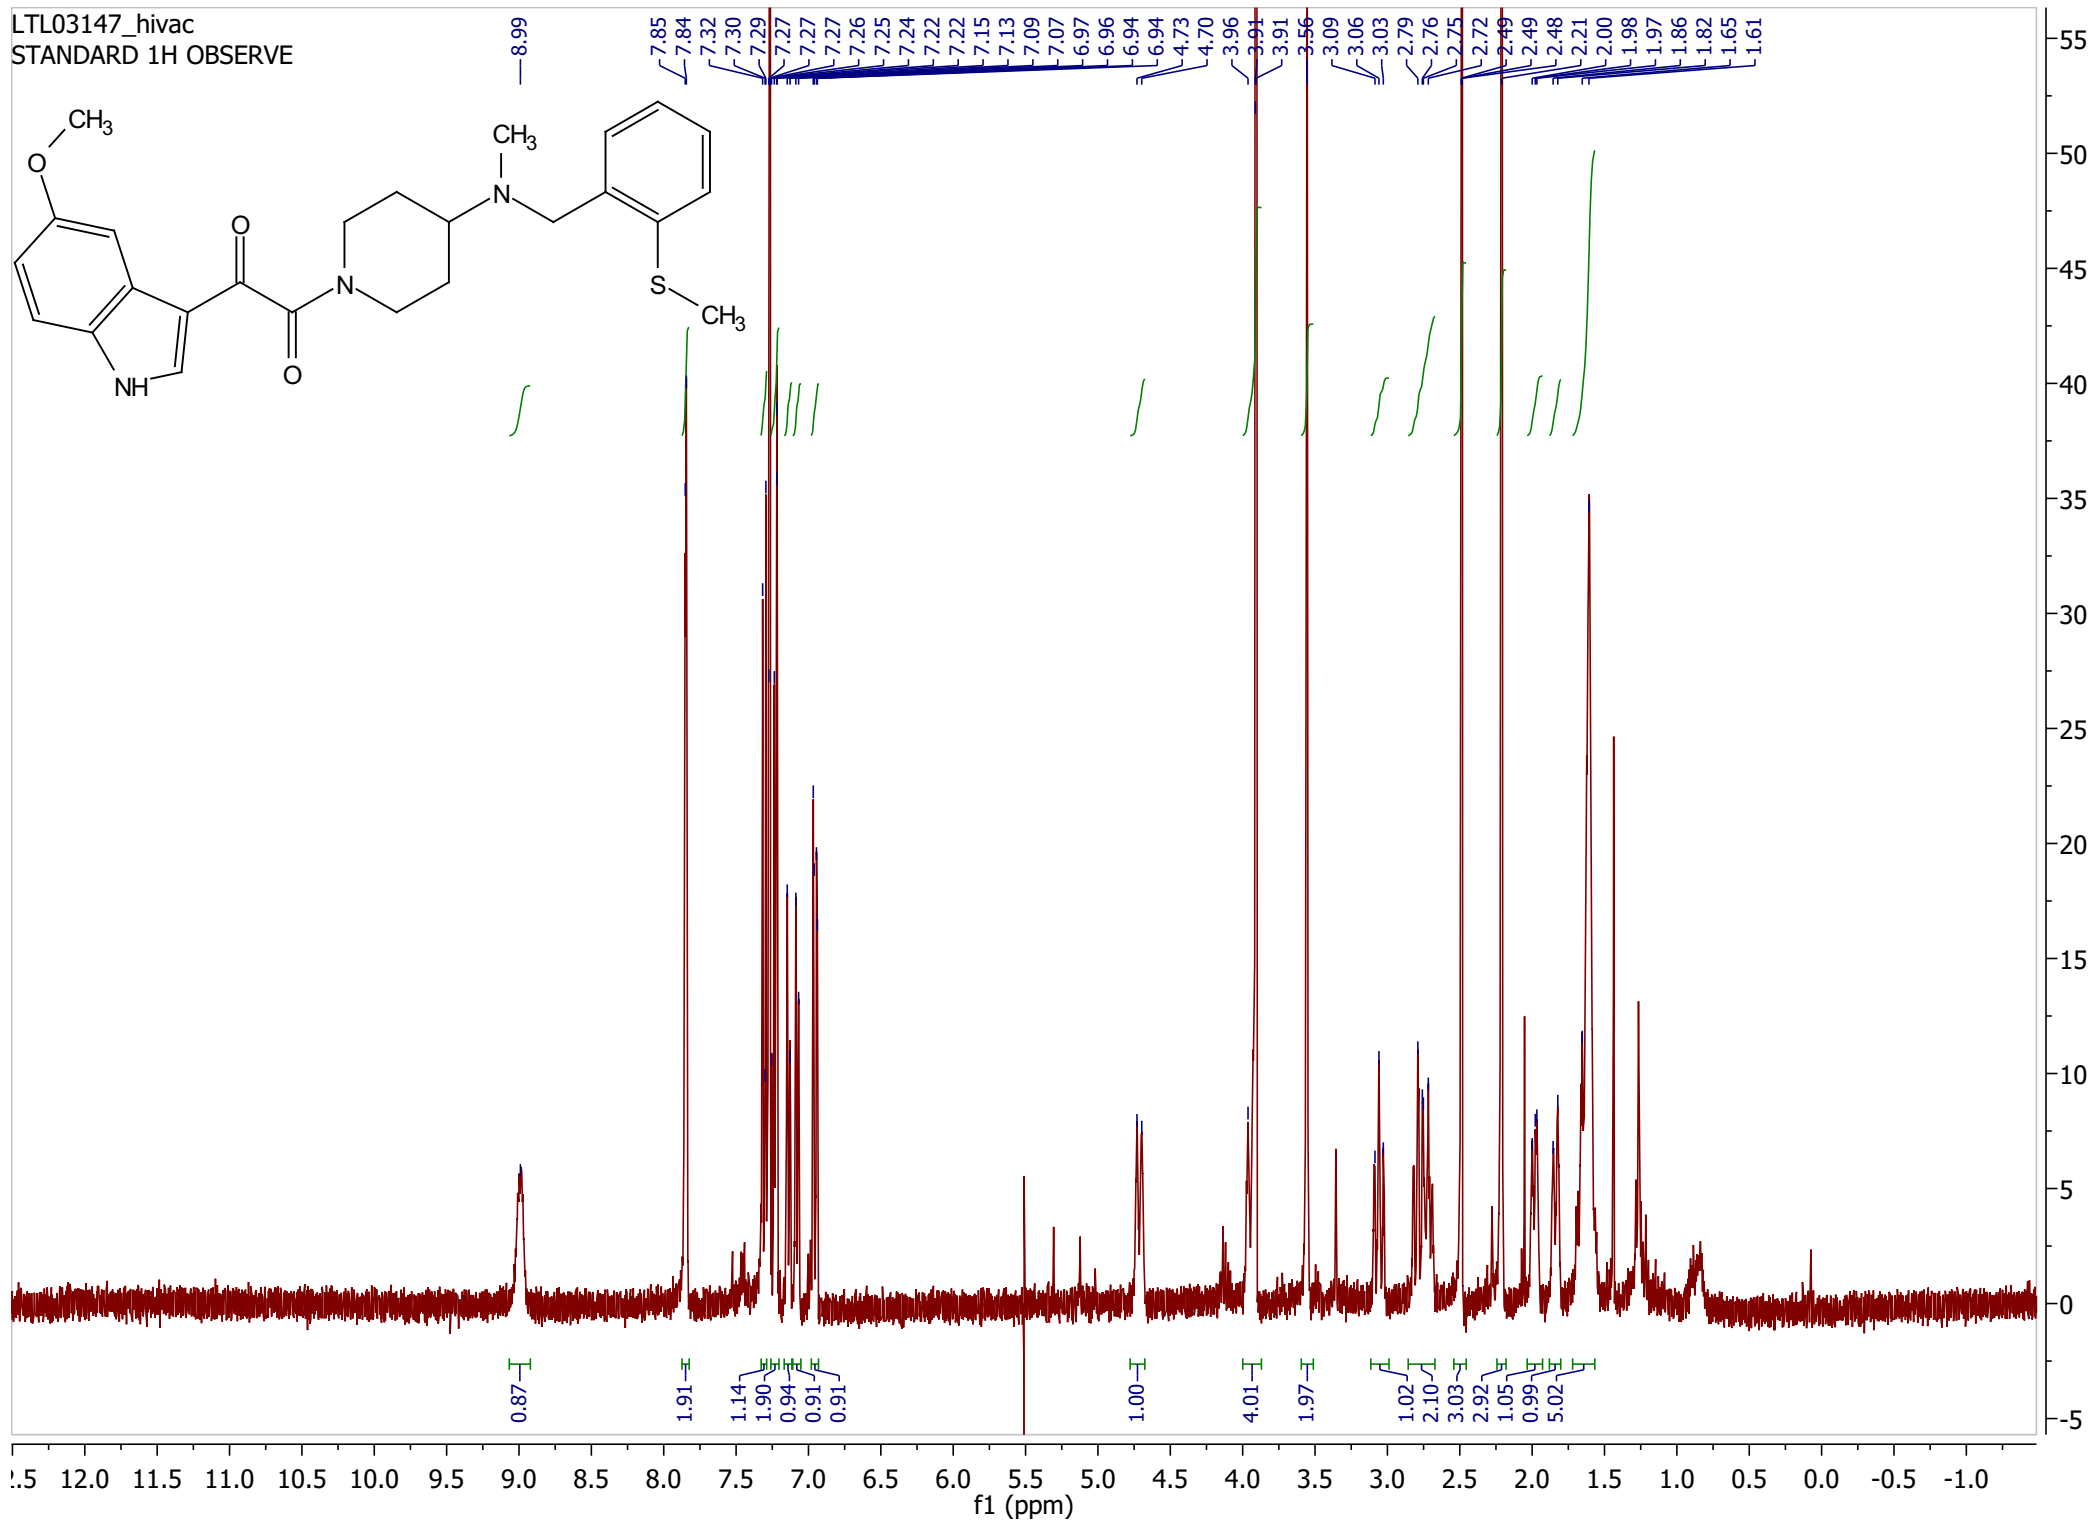

CARBON\_01  
LTL03147\_13C

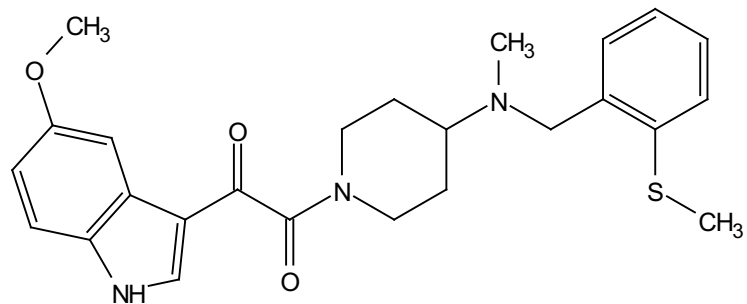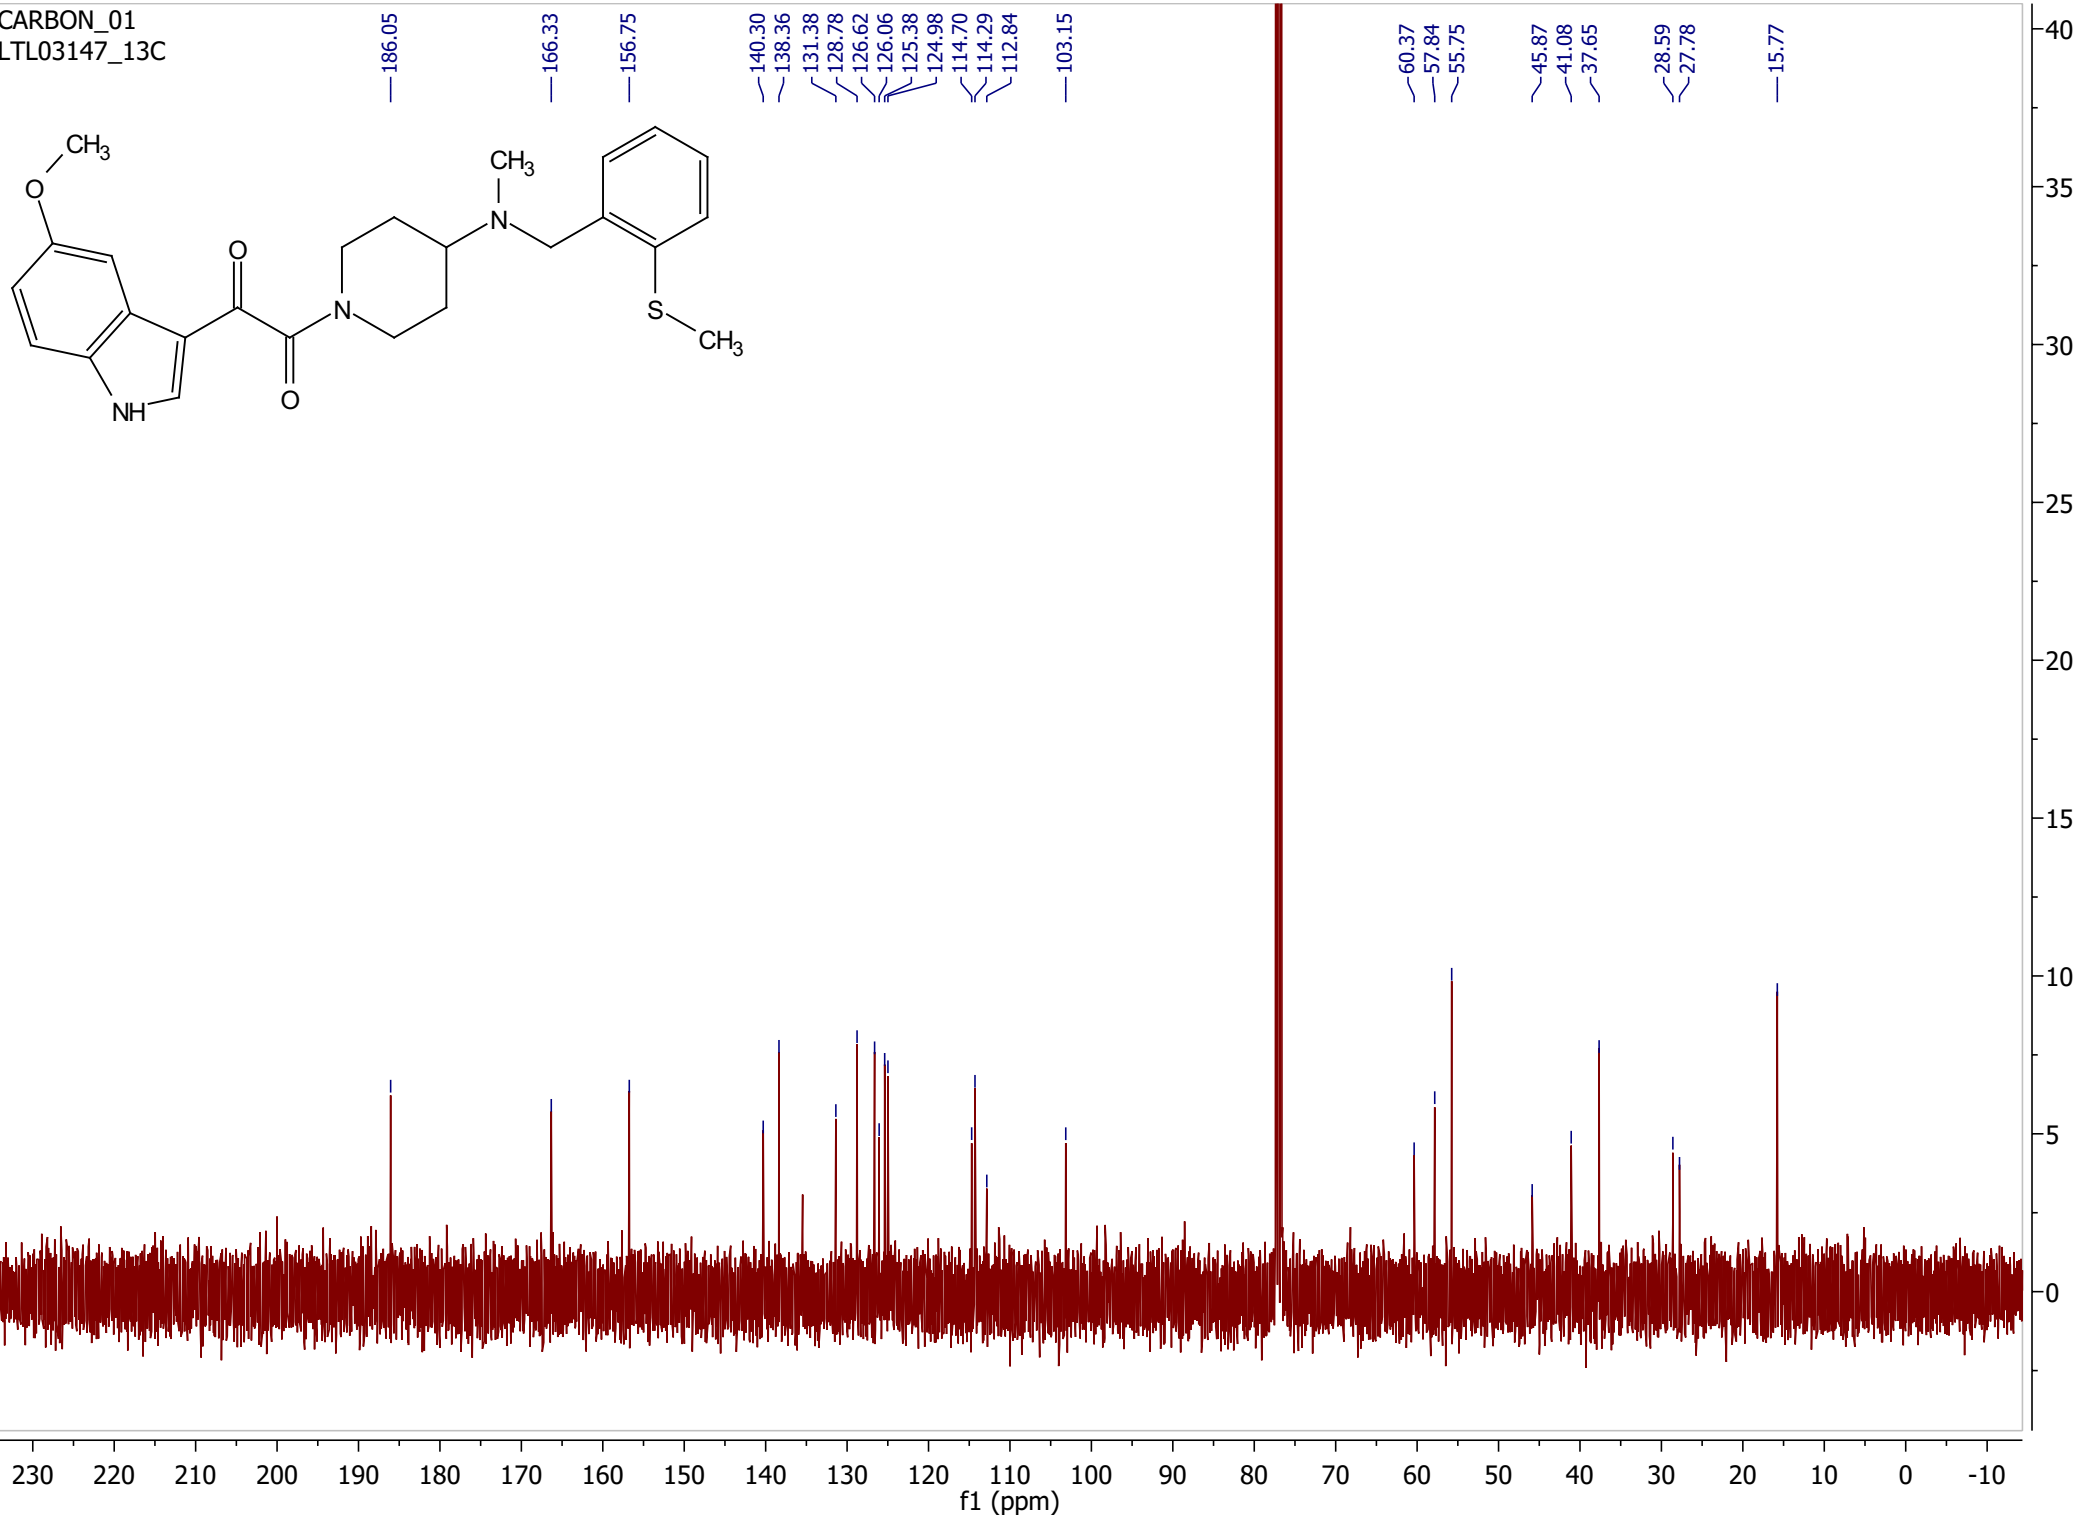

PROTON\_01  
LTL03150

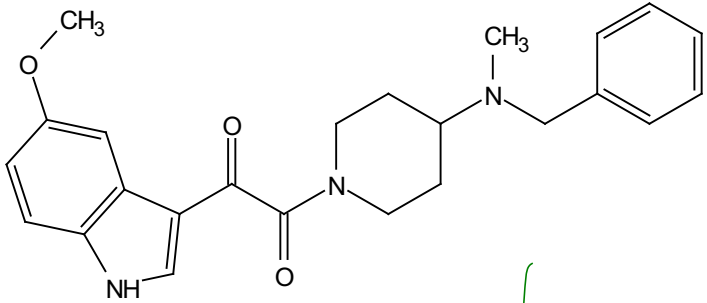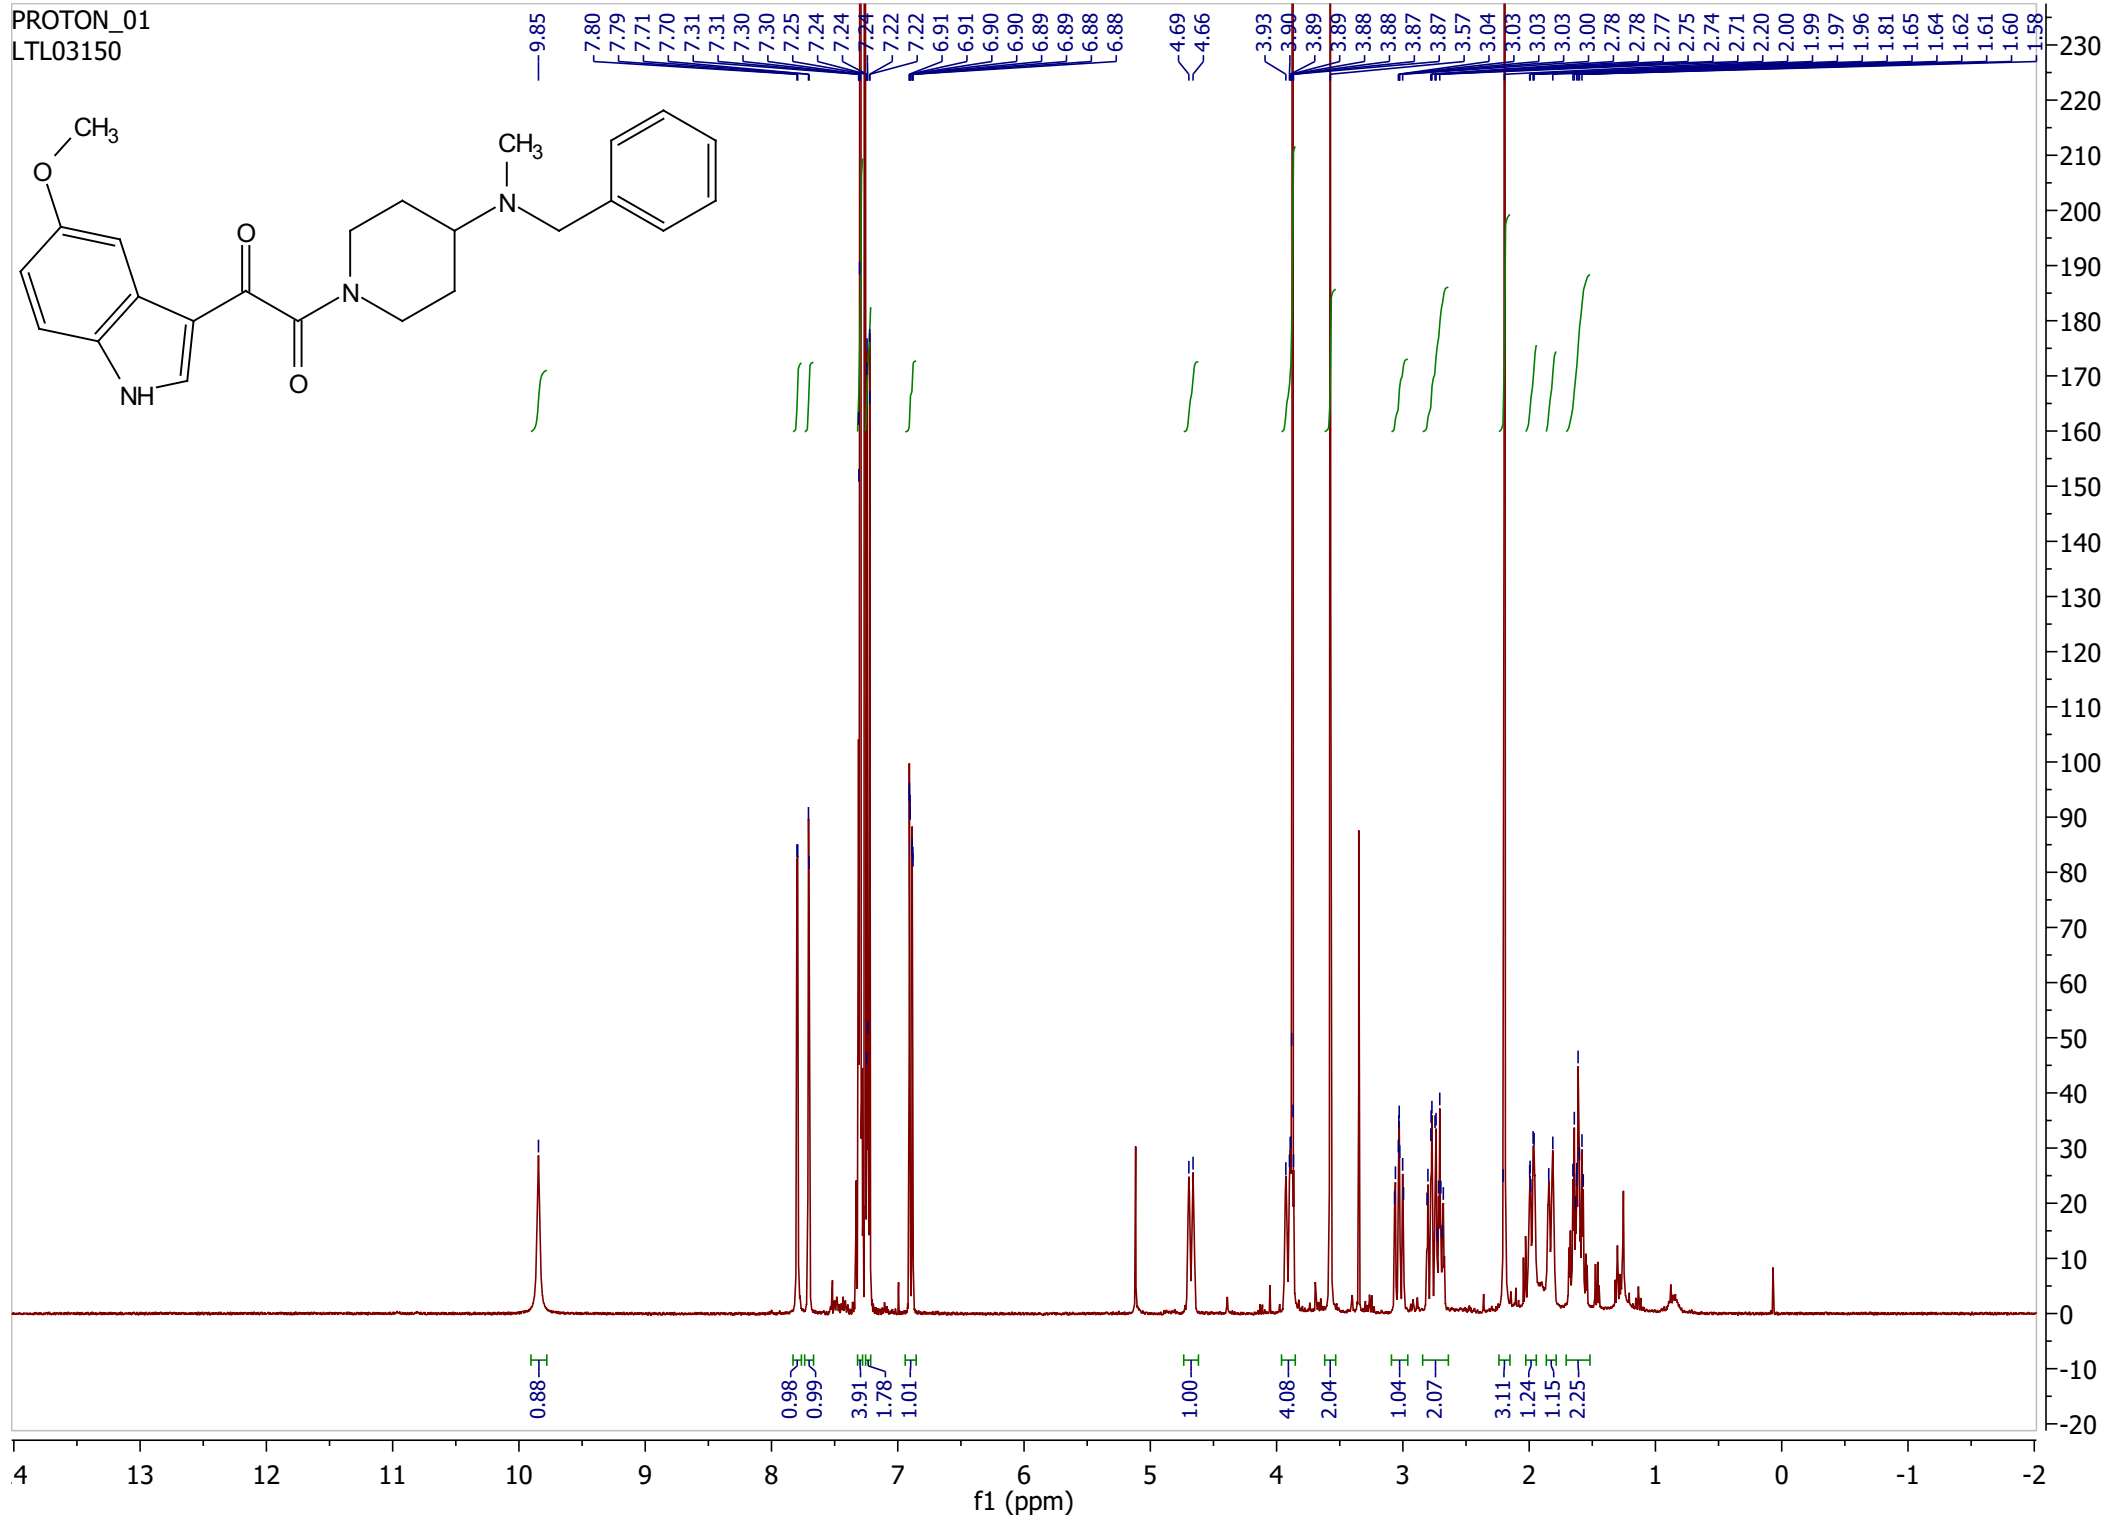

CARBON\_01  
LTL03150

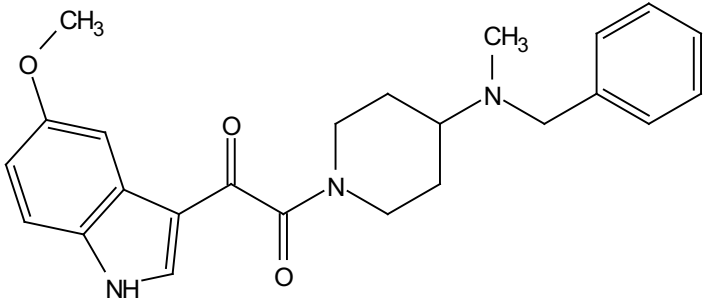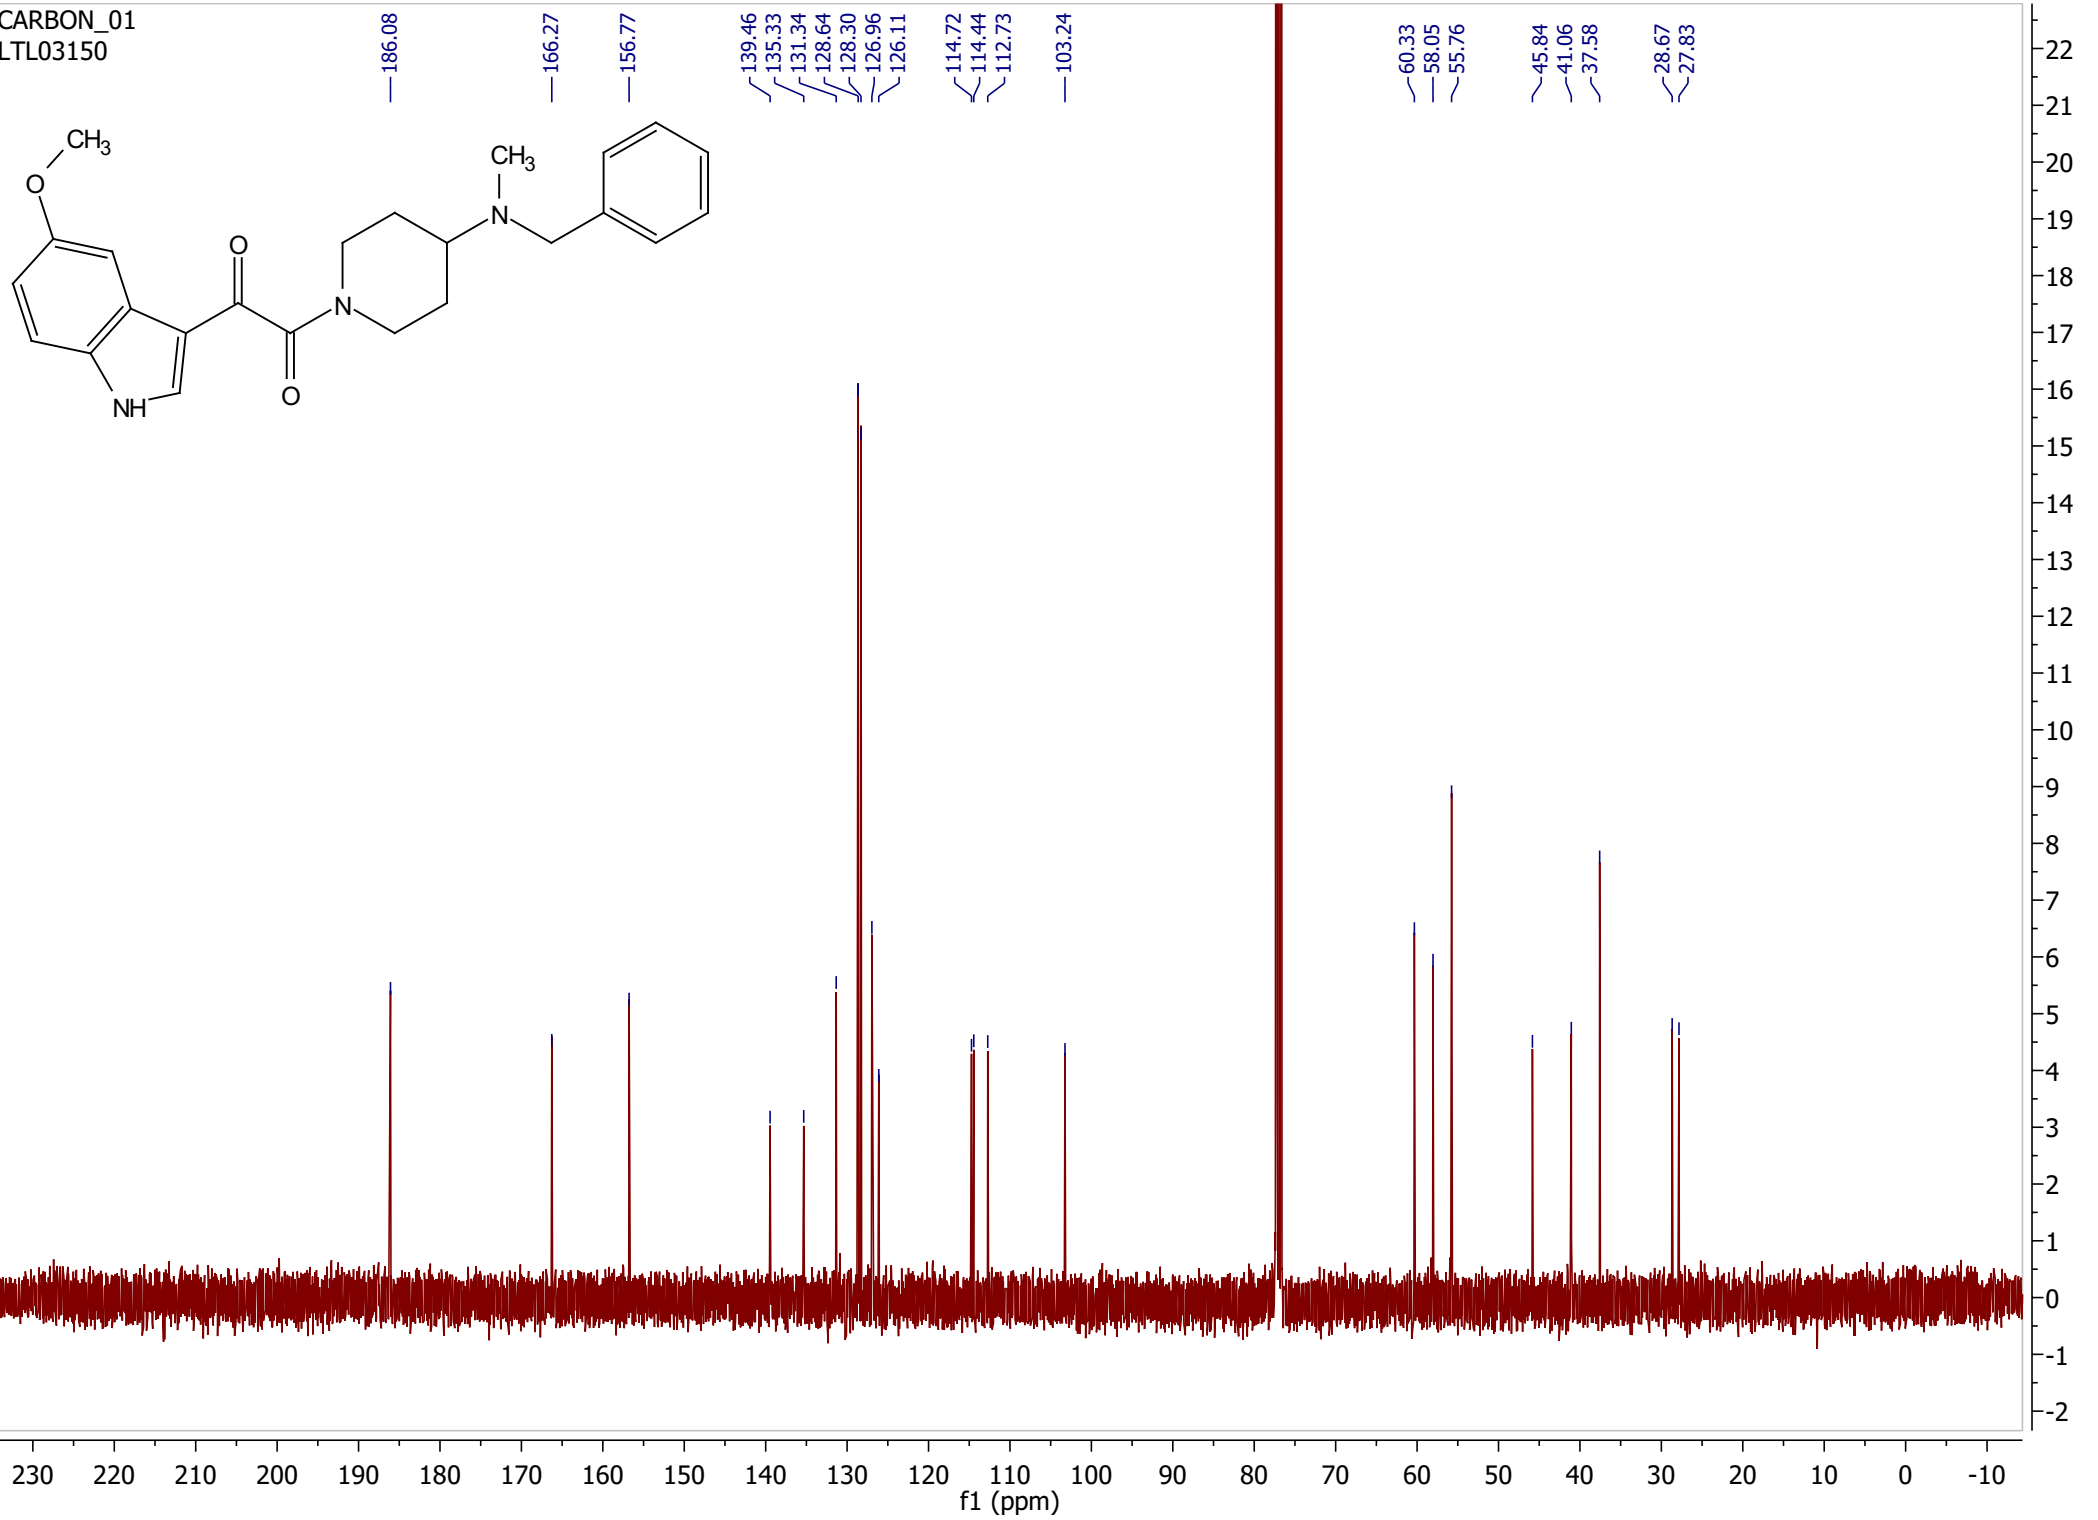

Supplement: NIHMS1578620-supplement-1.pdf [file NIHMS1578620-supplement-1.pdf]
